# Supplementary material for: Theoretical study of a derivative of chlorophosphine with aliphatic and aromatic Grignard reagents: S N 2@P or the novel S N 2@Cl followed by S N 2@C?
Source: Royal Society of Chemistry journal article supplement (doi:10.1039/d2ra00258b), 2022-01-01
Supplement: d2ra00258b1.pdf [file d2ra00258b1.pdf]

# Theoretical study of a derivative of chlorophosphine with aliphatic and aromatic Grignard reagents: $S_N2@P$ or the novel $S_N2@Cl$ followed by $S_N2@C$ ?

N. Savoo,<sup>1</sup> L. Rhyman<sup>1,2\*</sup> and P. Ramasami<sup>1,2\*</sup>

<sup>1</sup>Computational Chemistry Group, Department of Chemistry, Faculty of Science, University of Mauritius, Réduit 80837, Mauritius

<sup>2</sup>Department of Chemical Sciences, University of Johannesburg, Doornfontein Campus, Johannesburg 2028, South Africa

\*Emails: lyd.rhyman@gmail.com (LR) and p.ramasami@uom.ac.mu (PR)

## Supplementary Information

### S.1 Computational details

#### S.1.1 Distortion/interaction-activation strain model

Equation S1 shows how the D/I-ASM relates the relative electronic energy of a reaction ( $\Delta E$ ) to the relative strain ( $\Delta E_{\text{strain}}$ ) and relative interaction ( $\Delta E_{\text{int}}$ ) energies of the deformed reactant fragments along the reaction coordinate ( $\zeta$ ).

$$\Delta E(\zeta) = \Delta E_{\text{strain}}(\zeta) + \Delta E_{\text{int}}(\zeta) \quad \text{Equation S1}$$

The  $\Delta E_{\text{strain}}(\zeta)$  corresponds to the relative electronic energy necessary to distort the reactant fragments throughout the reaction while the  $\Delta E_{\text{int}}(\zeta)$  corresponds to the interactions between the deforming reactant fragments. We also investigated the effect of solvation along the PES using the D/I-ASM. The solvent-phase PES is described in terms of its components, solute energy and solvation energy, as in equation S2. The solvation energy englobes the solute-solvent interaction, as well as the formation of the solvent cavity.

$$\Delta E_{\text{solvation}}(\zeta) = \Delta E_{\text{solute}}(\zeta) + \Delta E_{\text{solvation}}(\zeta) \quad \text{Equation S2}$$

We obtained the  $\Delta E_{\text{solute}}(\zeta)$  from the SP energy values of the reactant fragments in gas phase, computed using their geometry from solvent-phase computations. Equation S3 shows a further breakdown of the  $\Delta E_{\text{solute}}$  into  $\Delta E_{\text{strain}}$  and  $\Delta E_{\text{int}}$ .

$$\Delta E_{\text{solute}}(\zeta) = \Delta E_{\text{strain}}(\zeta) + \Delta E_{\text{int}}(\zeta) \quad \text{Equation S3}$$

#### S.1.2 Diastereomeric ratio and relative Gibbs free energy barrier

Equation S4 shows how stereoselectivity of the diastereomers A and B is related to the temperature-dependent equilibrium constant K and hence to the standard-state Gibbs free energy of reaction ( $\Delta G$ ) at a particular temperature T.<sup>[1]</sup>

$$\frac{[A]}{[B]} = K = e^{-\frac{\Delta G}{RT}} \quad \text{Equation S4}$$

The extent of diastereoselectivity depends on the relative stability of the diastereomers A and B which can be calculated from the difference between the computed Gibbs free activation energies ( $\Delta\Delta G^\ddagger$ ) at a particular temperature.<sup>[2]</sup>

## S.2 Steric effect

The effect of steric congestion around the P atom in an organophosphorus reactant is a well-investigated aspect of the  $S_N2@P$  reaction:<sup>[3-5]</sup> An increase in the bulkiness of the substituents of the organophosphorus reactant changes the PES from a single-well to a triple-well and back to the archetypal double-well PES (Figure 1 in manuscript). However, this consensus was reached upon investigation of anionic  $S_N2@P$  reactions. In this section, we built on this consensus and showed that TCs, and hence single- and triple-well PESs, are not located in ion-pair  $S_N2@P$  reactions of trivalent organophosphorus reactants. Figure S1 shows the TSs of the  $S_N2@P$ -b and  $S_N2@P$ -f reactions in the gas phase and in THF. The  $\Delta G$  of the RCs, TSs, PCs and Ps are listed in Table S1.

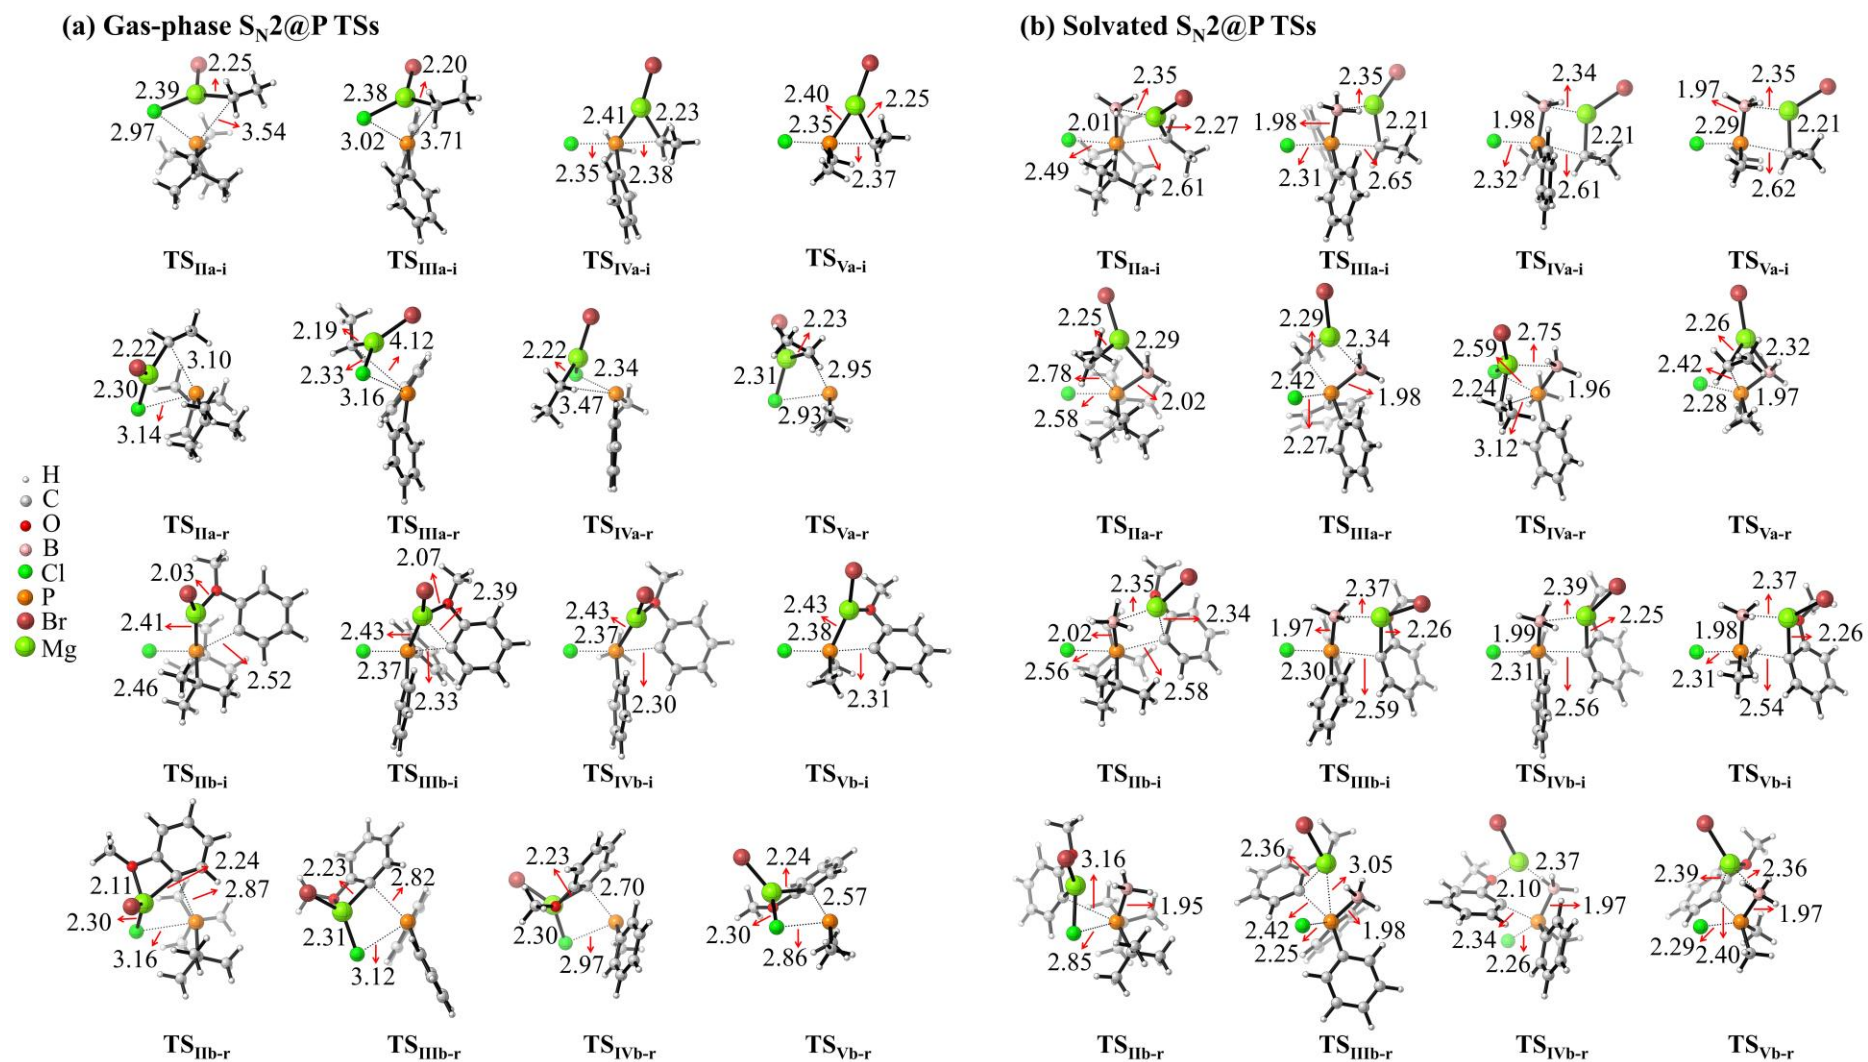

Figure S1: Geometries of the TSs of the  $S_N2@P$ -b and  $S_N2@P$ -f pathways of the  $R1_n + a$  and  $R1_n + b$  reactions in the (a) gas phase and (b) bulk-solvated with THF. The bond lengths/distances are in Å. The atom symbols are shown on the left-hand side.

Table S1:  $\Delta G$ , in kcal mol<sup>-1</sup>, of the RCs, TSs, PCs and Ps along the S<sub>N</sub>2@P-b and S<sub>N</sub>2@P-f pathways of the reactions of **R1<sub>n</sub>** with nucleophiles **a** and **b** in the gas phase and in THF. The values corresponding to the bulk-solvated phase are in brackets.

| Inversion pathway |                 |                  |                  |                  |               |                |                  |                  |                  |
|-------------------|-----------------|------------------|------------------|------------------|---------------|----------------|------------------|------------------|------------------|
| Pathway           | RC              | TS               | PC               | P                | Pathway       | RC             | TS               | PC               | P                |
| <b>Ia-i</b>       | -1.5<br>(+10.0) | +21.7<br>(+41.7) | -48.7<br>(-11.0) | -33.4<br>(-47.3) | <b>Ib-i</b>   | +1.9<br>(+8.1) | +27.7<br>(+53.9) | -43.2<br>(+14.4) | -17.5<br>(-33.7) |
| <b>IIa-i</b>      | -0.8<br>(+8.8)  | +32.2<br>(+56.0) | -48.5<br>(-15.1) | -30.9<br>(-43.7) | <b>IIb-i</b>  | -1.7<br>(+8.0) | +33.9<br>(+57.8) | -43.3<br>(-1.0)  | -14.2<br>(-20.2) |
| <b>IIIa-i</b>     | -0.6<br>(+8.8)  | +22.2<br>(+34.9) | -50.4<br>(-19.4) | -37.7<br>(-50.8) | <b>IIIb-i</b> | -0.7<br>(+9.2) | +21.0<br>(+30.1) | -46.5<br>(-39.2) | -22.3<br>(-37.0) |
| <b>IVa-i</b>      | -0.1<br>(+9.8)  | +23.0<br>(+30.8) | -51.3<br>(-17.0) | -37.2<br>(-50.8) | <b>IVb-i</b>  | -0.7<br>(+9.6) | +18.5<br>(+27.6) | -45.4<br>(-11.5) | -21.4<br>(-36.5) |
| <b>Va-i</b>       | +1.7<br>(+10.0) | +22.6<br>(+30.6) | -51.2<br>(-17.8) | -36.7<br>(-49.9) | <b>Vb-i</b>   | -0.6<br>(+8.8) | +18.8<br>(+28.6) | -44.8<br>(-11.5) | -20.4<br>(-35.9) |
| Retention pathway |                 |                  |                  |                  |               |                |                  |                  |                  |
| <b>Ia-r</b>       | +0.2<br>(+8.3)  | +21.7<br>(+44.3) | -33.9<br>(-49.0) | -33.4<br>(-47.3) | <b>Ib-r</b>   | -0.8<br>(+6.9) | +25.9<br>(+59.1) | -28.0<br>(+5.5)  | -18.1<br>(-33.7) |
| <b>IIa-r</b>      | +1.0<br>(+8.3)  | +28.3<br>(+63.7) | -28.4<br>(-12.3) | -30.9<br>(-44.5) | <b>IIb-r</b>  | +2.4<br>(+7.4) | +31.8<br>(+63.7) | -22.7<br>(-28.6) | -14.2<br>(-20.2) |
| <b>IIIa-r</b>     | +0.2<br>(+8.9)  | +23.3<br>(+48.0) | -51.5<br>(-48.7) | -37.6<br>(-50.8) | <b>IIIb-r</b> | +3.4<br>(+9.9) | +25.6<br>(+50.7) | -35.5<br>(-39.1) | -20.0<br>(-37.0) |
| <b>IVa-r</b>      | +0.7<br>(+10.3) | +24.3<br>(+44.5) | -50.8<br>(-49.2) | -37.1<br>(-50.8) | <b>IVb-r</b>  | +3.2<br>(+9.4) | +27.4<br>(+46.8) | -31.1<br>(-11.6) | -20.3<br>(-36.5) |
| <b>Va-r</b>       | -0.4<br>(+9.2)  | +26.8<br>(+47.5) | -32.3<br>(-48.3) | -36.7<br>(-49.9) | <b>Vb-r</b>   | +3.6<br>(+8.8) | +28.8<br>(+47.9) | -29.7<br>(-36.5) | -20.4<br>(-35.9) |

An increase in the substituent size in the **R1<sub>n</sub>** organophosphorus reactants causes the Cl–P–C bond angle of the TSs of the S<sub>N</sub>2@P-b pathways to bend (Figure S1), allowing for more interaction between the Mg<sup>2+</sup> cation and the Cl leaving group. In the S<sub>N</sub>2@P-f pathways, the Mg<sup>2+</sup> cation interacts with both the C atom of the nucleophile and the Cl atom of **R1<sub>n</sub>** on the same side of the P atom. An analysis of Table S1 shows that gas-phase ion-pair S<sub>N</sub>2 reactions occur mostly through unimodal PESs or through hill-and-well PESs with the PC as the minimum point, contrary to anionic S<sub>N</sub>2 reactions.<sup>[3-5]</sup> The preference of the pathway depends on the steric hindrance around the P atom of the organophosphorus reactants. On increasing the bulkiness of the substituents of **R1<sub>n</sub>**, we observed that (i) the PESs of the S<sub>N</sub>2@P-b pathways (**R1<sub>I</sub>** + **a** and **R1<sub>II</sub>** + **b**) shift back to the typical double-well shape; (ii) there is a general decrease in exergonicity in the reactions and; (iii) there is a general decrease in the  $\Delta\Delta G^\ddagger$  of the pathways. In line with the third observation, **R1<sub>II</sub>** prefers the S<sub>N</sub>2@P-f with both nucleophiles **a** and **b**. The trend in the PESs is explained through the D/I-ASM in the SI.

In the THF-solvated S<sub>N</sub>2@P-b pathways, the Mg<sup>2+</sup> cation is attracted to the high electron density of the B atom of the BH<sub>3</sub> moiety. The TSs of the S<sub>N</sub>2@P-b pathways have near-linear Cl–P–C bond angles. The combined effect of bulk solvation by THF and the ion-pair nucleophile renders the PESs of the S<sub>N</sub>2@P-b and S<sub>N</sub>2@P-f pathways (mostly) unimodal with only the TS as the stationary point. The reactions also become more exergonic than in the gas phase. As the bulkiness of the substituents increases, the Gibbs free energy barrier that reactants must overcome to reach the TS increases and the general decrease in exergonicity persists (Table S1). The S<sub>N</sub>2@P-b pathways have a lower Gibbs free energy barrier than the S<sub>N</sub>2@P-f pathways with both nucleophiles **a** and **b** in THF.

Next, we compared the S<sub>N</sub>2@P-b and S<sub>N</sub>2@Cl pathways of the **R1<sub>n</sub>** + **b** reactions in THF to investigate how the presence of less bulky substituents affects the preference of the pathway. Figure S2 illustrates

the bulk-solvated TSs of the  $S_N2@Cl$  and the consequent  $S_N2@C-f$  pathways of the  $R1_n + b$  reactions. Table 2 lists the  $\Delta G$  of the RCs, TSs, INTs and PCs of the  $S_N2@Cl$  and  $S_N2@C-f$  pathways.

(a) TSs of the  $S_N2@Cl$  pathways

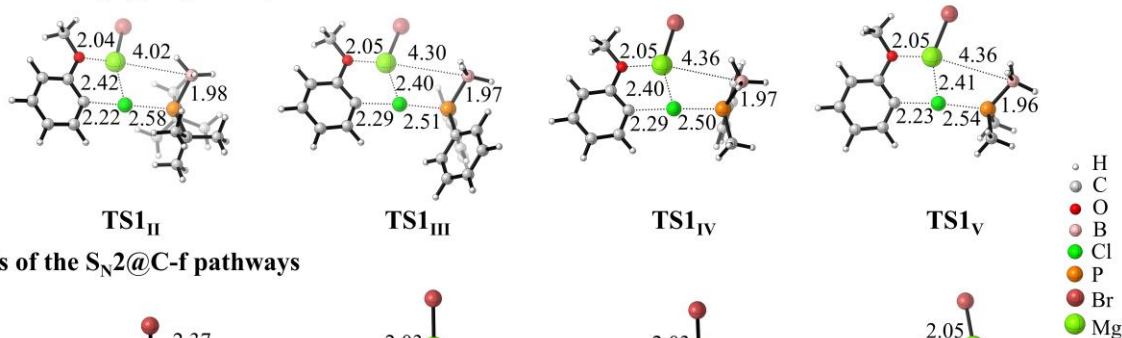

(b) TSs of the  $S_N2@C-f$  pathways

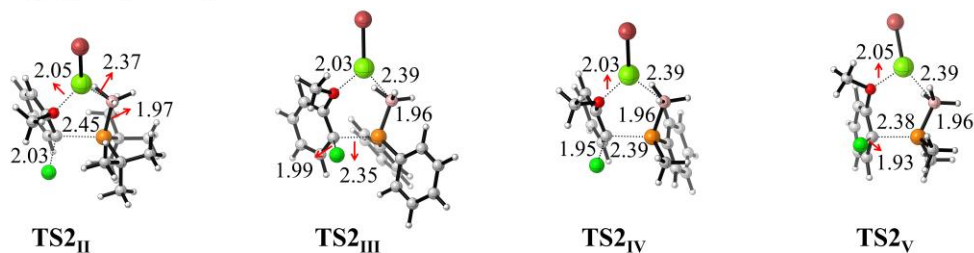

Figure S2: Geometries of the TSs of the (a)  $S_N2@Cl$  and (b)  $S_N2@C-f$  pathways of the  $R1_n + b$  bulk-solvated with THF. The bond lengths/distances are in Å. The atom symbols are shown on the right-hand side.

Table S2:  $\Delta G$  of the RCs, TSs, INTs, PCs and Ps of the THF-solvated  $S_N2@Cl$  and  $S_N2@C-f$  pathways in kcal mol<sup>-1</sup>.

| <b><math>S_N2@Cl</math> pathway</b>  |                       |                        |                         |                        |                       |
|--------------------------------------|-----------------------|------------------------|-------------------------|------------------------|-----------------------|
|                                      | <b>R1<sub>I</sub></b> | <b>R1<sub>II</sub></b> | <b>R1<sub>III</sub></b> | <b>R1<sub>IV</sub></b> | <b>R1<sub>V</sub></b> |
| <b>RC</b>                            | +6.3                  | +8.0                   | +8.2                    | +6.8                   | +8.4                  |
| <b>TS1</b>                           | +43.9                 | +48.5                  | +42.2                   | +43.4                  | +46.7                 |
| <b>INT1</b>                          | +12.7                 | +12.6                  | +8.9                    | +9.6                   | +12.4                 |
| <b><math>S_N2@C-f</math> pathway</b> |                       |                        |                         |                        |                       |
| <b>INT2</b>                          | +9.7                  | +15.2                  | +9.3                    | +14.3                  | +17.5                 |
| <b>TS2</b>                           | +54.2                 | +53.6                  | +43.7                   | +43.4                  | +46.5                 |
| <b>PC</b>                            | -4.2                  | -5.0                   | -12.2                   | -12.1                  | -12.2                 |
| <b>P</b>                             | -33.7                 | -20.2                  | -37.0                   | -36.5                  | -35.9                 |

A comparison of Tables S1 and S2 shows that, similar to the  $R1_I + b$  reaction, the Gibbs free energy barrier of the  $S_N2@P-b$  pathway of the  $R1_{II} + b$  reaction is higher (+57.8 kcal mol<sup>-1</sup>) than that of the  $S_N2@Cl$  pathway (+48.5 kcal mol<sup>-1</sup>). The reactions of  $R1_{III}$ ,  $R1_{IV}$  and  $R1_V$  investigated occur through the  $S_N2@P-b$  pathway in THF. This shows that the nucleophile  $b$  may approach the reactive backside of the P atom better when the P atom is less crowded by the presence of small substituents. As the bulkiness of the substituent increases, competing mechanisms, such as the  $S_N2@Cl$  mechanism, become more favourable.

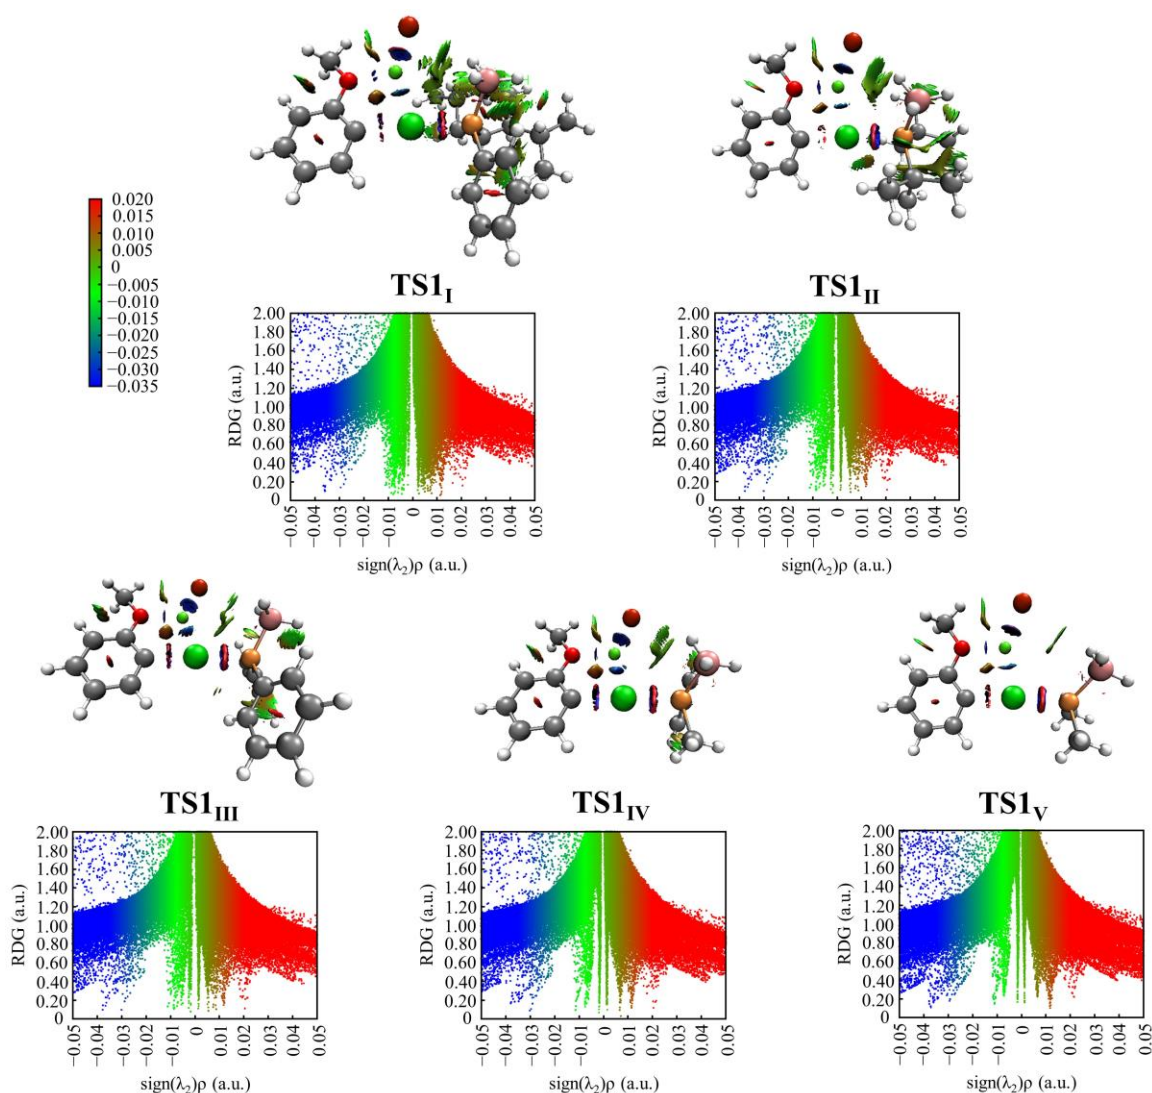

Figure S3: 2D and 3D plots of the **TS1<sub>n</sub>** of the  $S_N2@Cl$  pathways. The NCI isosurfaces correspond to an isovalue of  $s = 0.5$  a.u.

We also performed NCI analysis of the **TS1<sub>n</sub>** of the  $S_N2@Cl$  pathways and the 2D and 3D NCI plots are displayed in Figure S3. In the plot for the **TS1<sub>V</sub>**, a blue patch between the  $Mg^{2+}$  cation and the O atom shows attractive interaction which spreads over a broad intermolecular space from a value of  $sign(\lambda_2)\rho$  of  $-0.05$  to  $-0.04$  a.u. A trough at approximately  $sign(\lambda_2)\rho = -0.04$  a.u. shows the  $Mg\cdots Br$  interaction which is also depicted by a blue isosurface. The  $Mg\cdots Cl$  interaction is less attractive and represented by a pale blue isosurface and a trough at approximately  $sign(\lambda_2)\rho = -0.03$  a.u. The green isosurfaces ( $-0.03 > sign(\lambda_2)\rho > 0$ ) represent three types of van der Waals interactions:  $O-C\cdots H-C$ ,  $Br\cdots H-C$  and  $B-H\cdots Br$ . In the  $0 > sign(\lambda_2)\rho > 0.01$  region, the repulsive interactions depicted by three brown isosurfaces occur at three positions due to *pseudo*-ring enclosures. These include the  $C-O-C-C-H$  of the phenyl ring of the nucleophile **b** and the  $O-Mg-Cl-C-C$  and  $O-Mg-Br-H-C$  *pseudo*-rings formed at the TS. Between the C and Cl atoms and the Cl and P atoms, an attractive isosurface is observed enclosed by a repulsive wall at  $sign(\lambda_2)\rho = 0.02$  a.u. Finally, the non-bonded overlap between the C atoms of the phenyl ring causes a steric repulsion shown by the red region at  $sign(\lambda_2)\rho = 0.04$  a.u. Similar isosurfaces were observed in all the **TS1<sub>n</sub>**. In the **TS1<sub>I</sub>** and **TS1<sub>II</sub>**, areas of van der Waals interaction and steric repulsion were also observed between the B atom and surrounding H atoms of the substituents, and between the B atom and surrounding C atoms, respectively.

Figure S4 shows the changes in strain, interaction and solvation which are responsible for the trends in the PESs of the  $\mathbf{R1}_n + \mathbf{a}$  and  $\mathbf{R1}_n + \mathbf{b}$  reactions. A comparison of  $\Delta E_{\text{solvation}}$  along the  $\text{S}_{\text{N}}2@P\text{-b}$  and  $\text{S}_{\text{N}}2@P\text{-f}$  pathways in Figures S4 (a) shows that THF stabilises all points on the PES of the  $\text{S}_{\text{N}}2@P\text{-b}$  pathways to a greater extent than those of the  $\text{S}_{\text{N}}2@P\text{-f}$  pathways. This happens because of the charge separation along the PESs. The reactants along the inversion pathways deform to generate TSs with linear Cl–P–C bond angles, whereas along the retention pathways, the reactants deform and lead to TSs with a cyclic geometry. There is more charge separation, and hence more stabilisation by THF, along the pathways forming the TSs with linear Cl–P–C bond angles than along pathways featuring TSs with cyclic geometries.

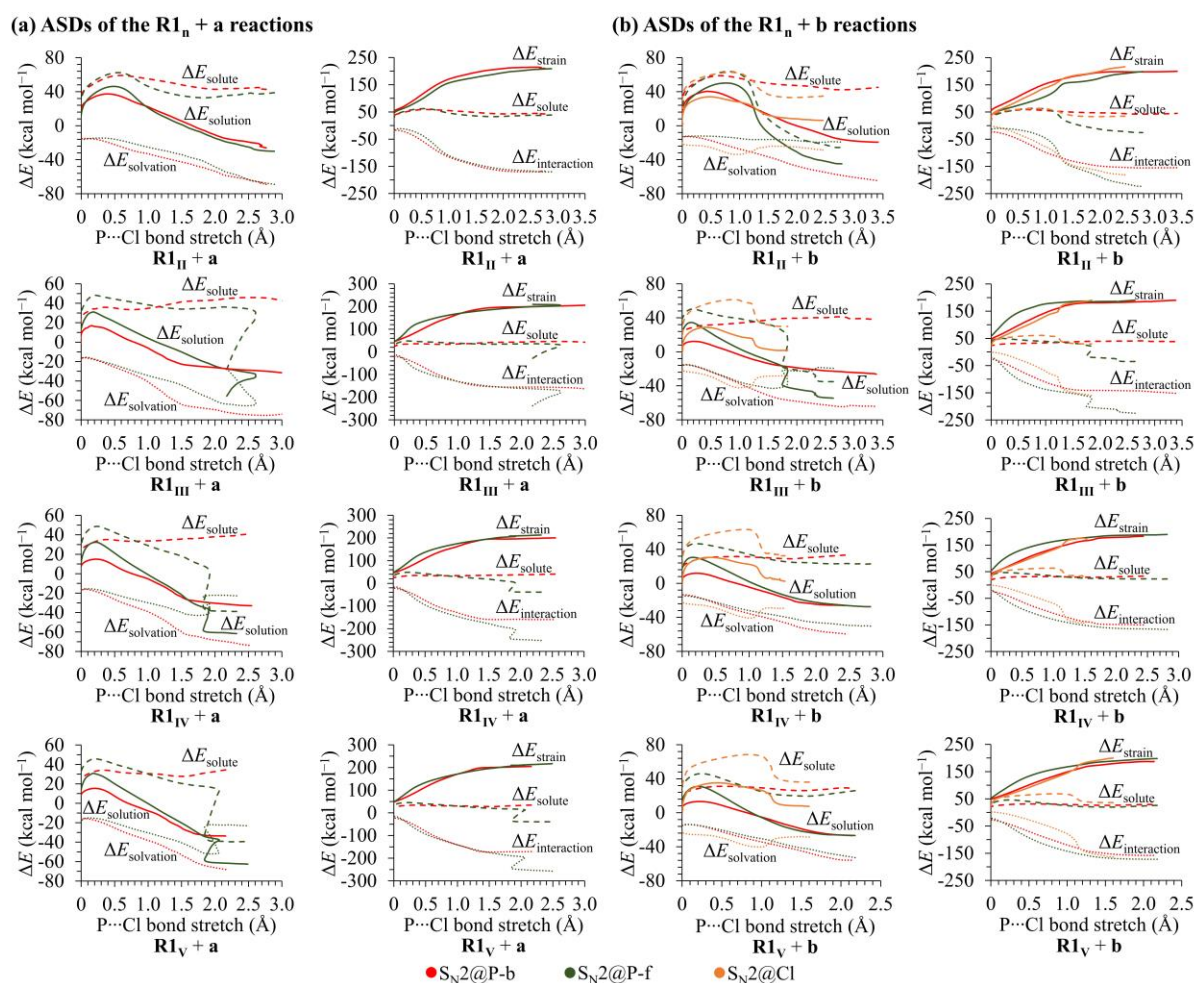

Figure S4: ASDs of the (a)  $\mathbf{R1}_n + \mathbf{a}$  and (b)  $\mathbf{R1}_n + \mathbf{b}$  reactions.

At the start of the reactions, in the presence of small substituents ( $\mathbf{R1}_{\text{III}}$ ,  $\mathbf{R1}_{\text{IV}}$  and  $\mathbf{R1}_{\text{V}}$ ), the deforming reactant fragments experience more  $\Delta E_{\text{strain}}$  and less stabilising  $\Delta E_{\text{interaction}}$  in the  $\text{S}_{\text{N}}2@P\text{-f}$  pathway than in the  $\text{S}_{\text{N}}2@P\text{-b}$  pathway. As the reactions progress, the  $\Delta E_{\text{strain}}$  becomes comparable along both pathways and  $\Delta E_{\text{int}}$  becomes more stabilising along the  $\text{S}_{\text{N}}2@P\text{-f}$  pathway. The  $\text{S}_{\text{N}}2@P\text{-b}$  pathways are preferred to the  $\text{S}_{\text{N}}2@P\text{-f}$  pathways due to more stabilisation by THF and due to lower deformational strain in the initial stages of the reaction. As the substituents of the organophosphorus reactant increase in size in  $\mathbf{R1}_{\text{II}}$  [Figure S4 (a)] and  $\mathbf{R1}_{\text{I}}$  [Figure 5 (a) in manuscript], the  $\Delta E_{\text{strain}}$  is higher throughout the inversion pathway. However, the lower Gibbs free energy barrier (Table S1) of the  $\text{S}_{\text{N}}2@P\text{-b}$  pathway is due to more stabilising  $\Delta E_{\text{interaction}}$  between deforming reactants and more stabilising  $\Delta E_{\text{solvation}}$  along the pathway. Hence, the  $\mathbf{R1}_n + \mathbf{a}$  reactions proceed through the  $\text{S}_{\text{N}}2@P\text{-b}$  pathway.

When comparing the ASDs for the  $\mathbf{R1}_n + \mathbf{b}$  reactions [Figure S4 (b)], the same trends in strain, interaction and solvation as in the  $\mathbf{R1}_n + \mathbf{a}$  reactions were observed for the  $\text{S}_{\text{N}}2@P$  pathways. The

$S_N2@Cl$  pathways experience the most stabilisation by solvent before the TS is formed, at the TS and even after the formation of the TS. This is because of higher charge separation caused by the linearity of the  $C\cdots Cl\cdots P$  backbone. The  $\Delta E_{solvation}$  becomes less stabilising than the  $S_N2@P$  pathways as the geometry becomes increasingly non-linear while the PESs progress towards the **INT1<sub>n</sub>**.

The deformed reactants along the  $S_N2@P$ -f pathway of the **R1<sub>II</sub>** + **b** reaction experience the least strain throughout the PES. However, the  $\Delta E_{interaction}$  and  $\Delta E_{solvation}$  have the least stabilising effect on the PES of the  $S_N2@P$ -f pathway. Similar to the **R1<sub>I</sub>** + **b** reaction, the  $S_N2@Cl$  pathway is favoured due to lower strain and better stabilisation by THF. As the size of the substituents decreases, the  $\Delta E_{interaction}$  of the  $S_N2@P$ -f pathways of the **R1<sub>n</sub>** + **b** reactions becomes the most stabilising. However, the  $S_N2@P$ -f pathways have the highest energy barrier due to the highest  $\Delta E_{strain}$  and the least stabilisation by THF. The  $\Delta E_{strain}$  along the  $S_N2@Cl$  pathways is lower to or comparable to the  $S_N2@P$ -b pathway in the initial stages. As the reactions progress, the strain component becomes higher than that of the  $S_N2@P$ -b pathway. The  $\Delta E_{interaction}$  remains less stabilising than that of the  $S_N2@P$ -b pathway. Although THF stabilises the  $S_N2@Cl$  pathways the most, the interplay between the  $\Delta E_{strain}$  and  $\Delta E_{interaction}$  makes the  $S_N2@P$ -b pathways preferred as the size of the substituents decreases.

### S.2.1 Use of dispersion-corrected M06-2X functional

The reactions were also investigated using the M06-2X-D3/6-31++G(d,p) method. Tables S3 and S4 list the  $\Delta G$  values along the PESs of the  $S_N2@C$ -b and  $S_N2@C$ -f pathways of the reactions of **R1<sub>I</sub>** to **R1<sub>V</sub>** with **a** and **b**. Table S5 lists the  $\Delta G$  values along the two-step  $S_N2$  reactions ( $S_N2@Cl$  and  $S_N2@C$ -f pathways). From tables S3 to S5, it is observed that the  $\Delta G$  values are lower than the values computed with the B3LYP/6-31++G(d,p) method.



**Table S3:**  $\Delta G$ , in kcal mol<sup>-1</sup>, of the RCs, TSs, PCs and Ps of the S<sub>N</sub>2@C-b and S<sub>N</sub>2@C-f pathways of the reactions of **R1<sub>I</sub>** to **R1<sub>V</sub>** with **a**.

| <b>S<sub>N</sub>2@P-b pathways</b> |           |           |           |          |
|------------------------------------|-----------|-----------|-----------|----------|
| <b>Pathways</b>                    | <b>RC</b> | <b>TS</b> | <b>PC</b> | <b>P</b> |
| <b>Ia-i</b>                        | +1.9      | +29.3     | -48.7     | -50.3    |
| <b>IIa-i</b>                       | +2.1      | +44.5     | -20.5     | -46.9    |
| <b>IIIa-i</b>                      | +4.1      | +20.3     | -58.6     | -54.6    |
| <b>IVa-i</b>                       | +3.4      | +18.2     | -54.1     | -53.4    |
| <b>Va-i</b>                        | +4.3      | +19.4     | -25.8     | -52.6    |
| <b>S<sub>N</sub>2@P-f pathways</b> |           |           |           |          |
| <b>Ia-r</b>                        | +1.9      | +41.6     | -59.0     | -50.3    |
| <b>IIa-r</b>                       | +2.5      | +50.9     | -22.0     | -48.0    |
| <b>IIIa-r</b>                      | +3.5      | +32.2     | -57.3     | -54.6    |
| <b>IVa-r</b>                       | +4.4      | +36.6     | -56.6     | -53.0    |
| <b>Va-r</b>                        | +2.6      | +35.1     | -57.0     | -52.6    |

**Table S4:**  $\Delta G$ , in kcal mol<sup>-1</sup>, of the RCs, TSs, PCs and Ps of the S<sub>N</sub>2@C-b and S<sub>N</sub>2@C-f pathways of the reactions of **R1<sub>I</sub>** to **R1<sub>V</sub>** with **b**.  $\Delta E$  values are in parentheses.

| <b>S<sub>N</sub>2@P-b pathways</b> |           |           |           |          |
|------------------------------------|-----------|-----------|-----------|----------|
| <b>Pathways</b>                    | <b>RC</b> | <b>TS</b> | <b>PC</b> | <b>P</b> |
| <b>Ib-i</b>                        | -2.7      | +31.5     | -2.9      | -34.3    |
| <b>IIb-i</b>                       | -1.5      | +40.5     | -14.1     | -30.0    |
| <b>IIIb-i</b>                      | +0.9      | +10.3     | -56.7     | -41.3    |
| <b>IVb-i</b>                       | +0.4      | +12.6     | -20.2     | -39.5    |
| <b>Vb-i</b>                        | +3.6      | +14.9     | -21.2     | -38.4    |
| <b>S<sub>N</sub>2@P-f pathways</b> |           |           |           |          |
| <b>Ib-r</b>                        | -1.7      | +47.6     | -7.6      | -37.2    |
| <b>IIb-r</b>                       | -1.3      | +50.1     | -13.1     | -30.0    |
| <b>IIIb-r</b>                      | +2.1      | +32.6     | -54.2     | -41.3    |
| <b>IVb-r</b>                       | +1.9      | +30.0     | -22.0     | -39.5    |
| <b>Vb-r</b>                        | +1.5      | +32.8     | -51.1     | -38.4    |

### S.3 Gas-phase S<sub>N</sub>2@P reactions

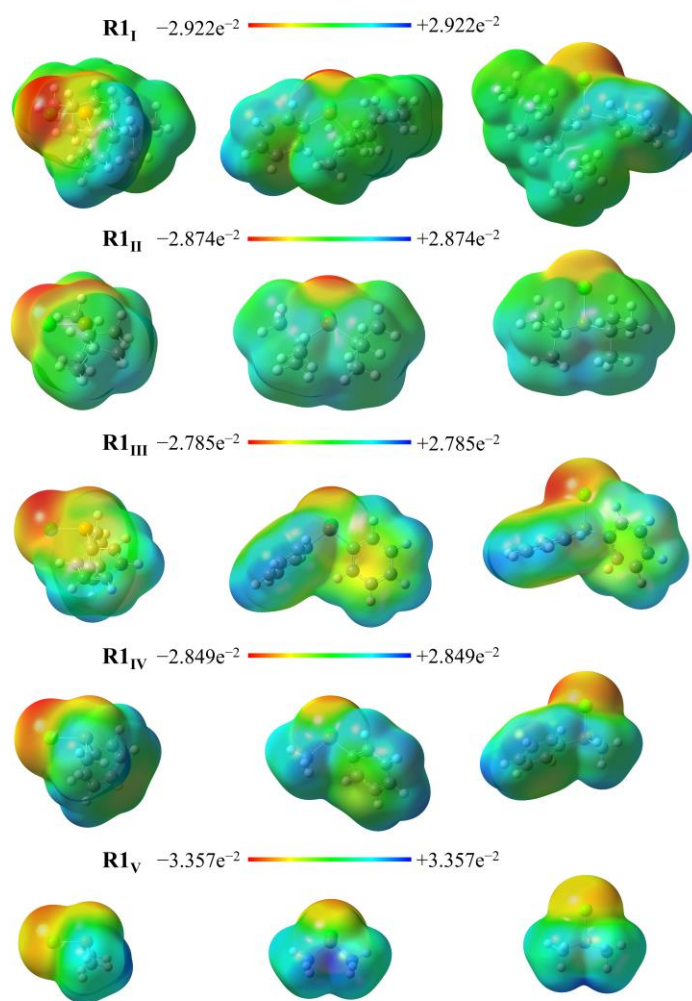

Figure S5: ESP maps (electrostatic potentials in au) in the gas phase.

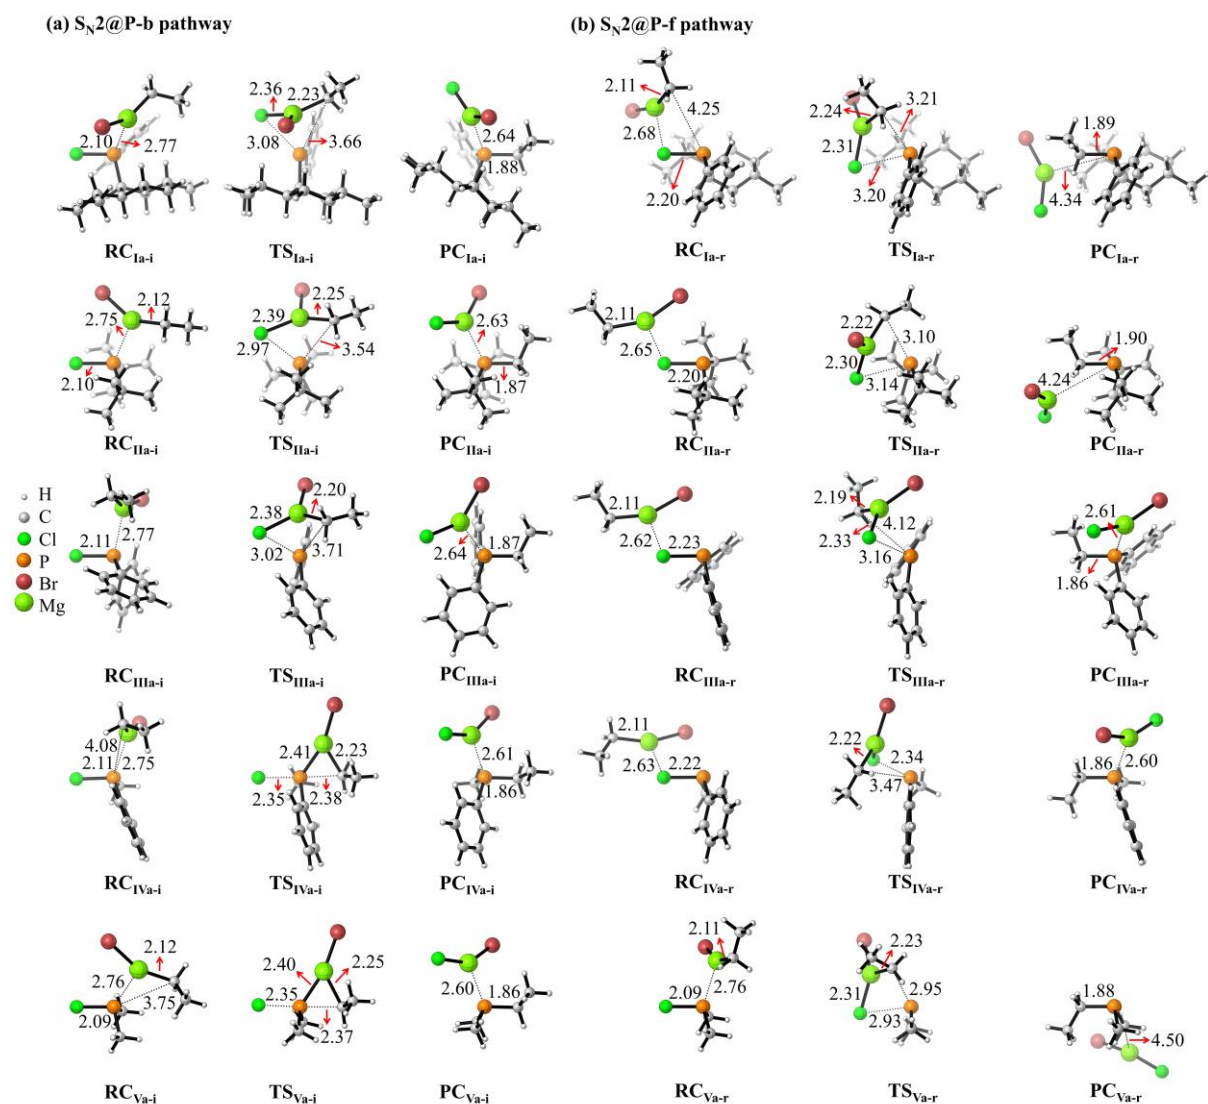

Figure S6: Gas-phase geometries of the RCs, TSs and PCs of the inversion and retention pathways of the  $S_N2@P$  reactions. Bond lengths/distances are in Å.

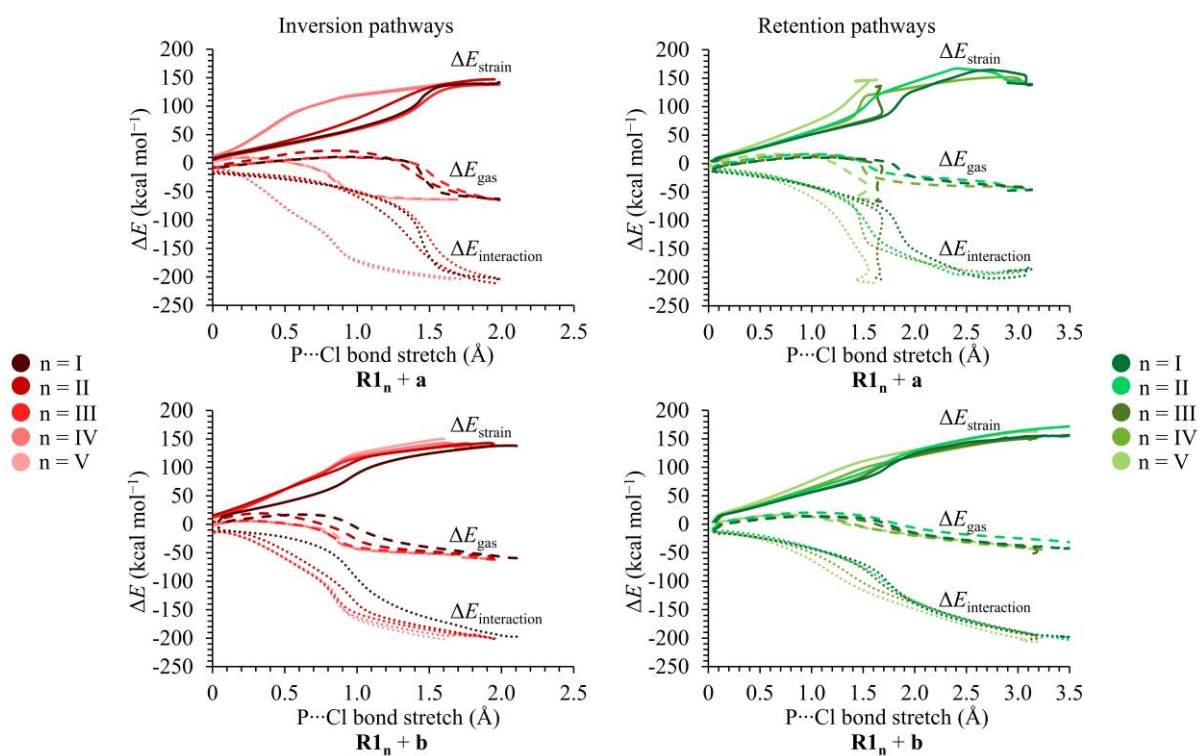

Figure S7: ASDs of the inversion and retention pathways of the  $\mathbf{R1}_n + \mathbf{a}$  and  $\mathbf{R1}_n + \mathbf{b}$   $\text{S}_{\text{N}}2@P$  reactions in the gas phase.

## S.4 THF-solvated $S_N2@P$ reactions

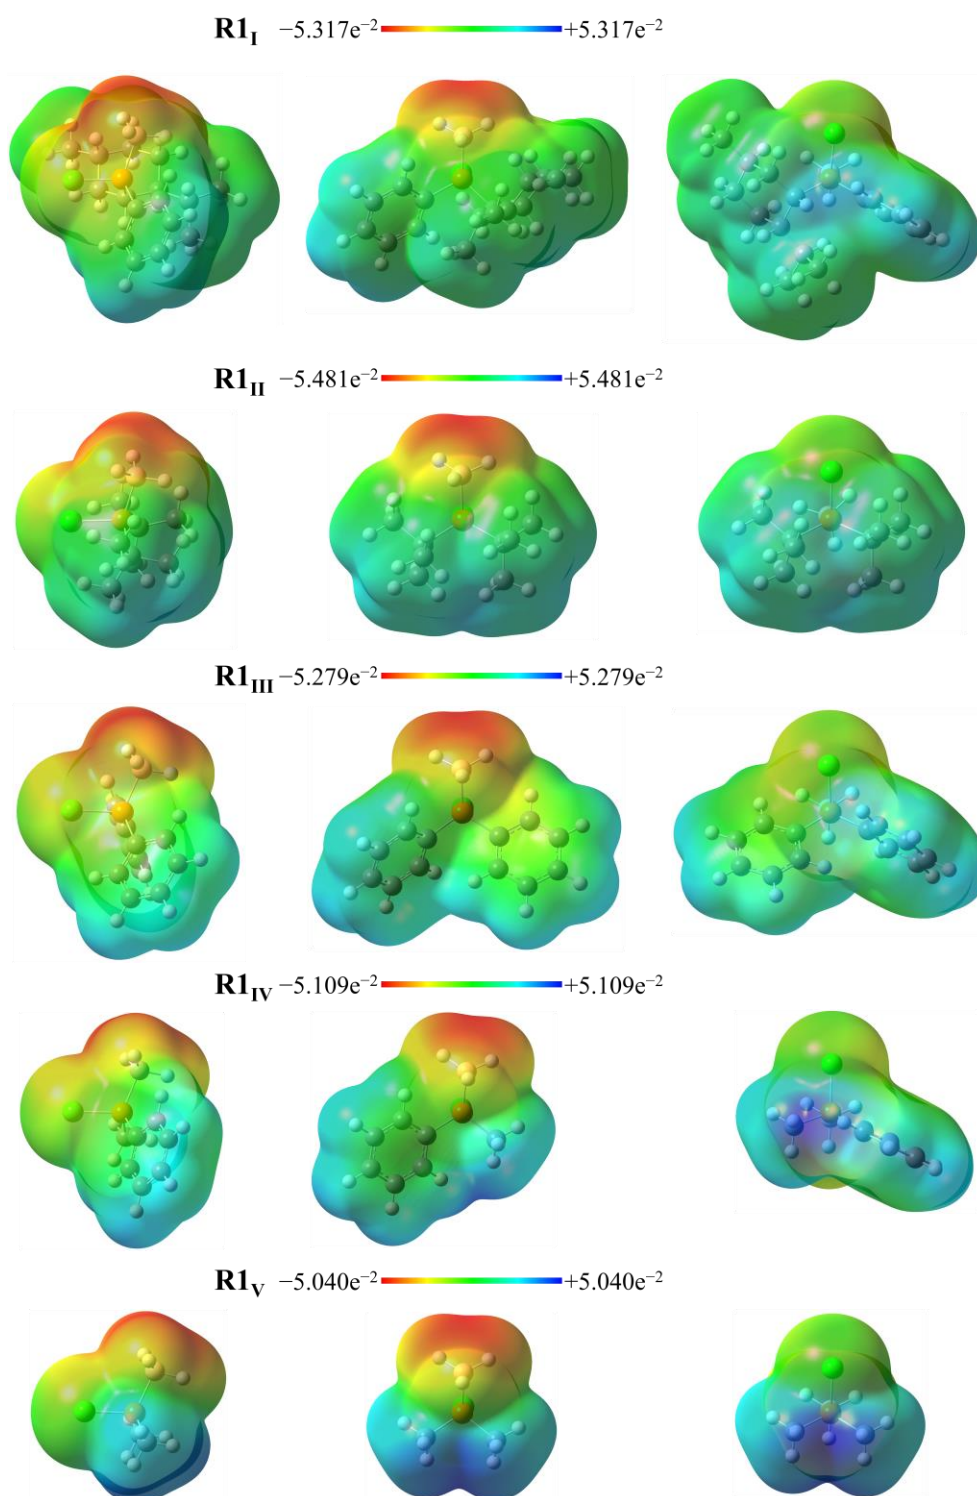

Figure S8: ESP maps (electrostatic potential in au) in THF.

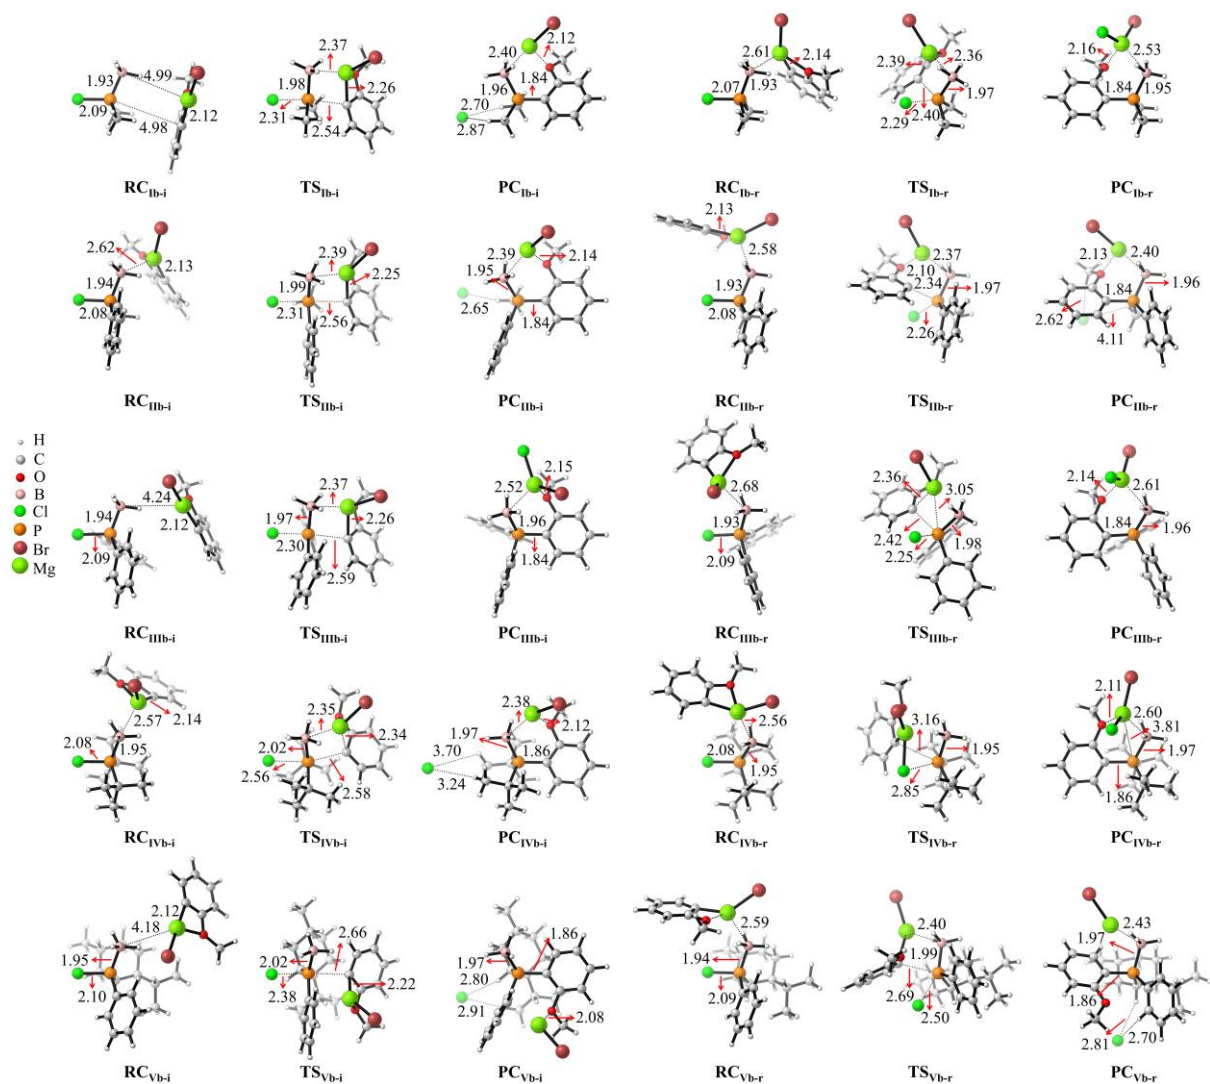

Figure S9: THF-based geometries of the RCs, TSs and PCs of the inversion and retention pathways of the  $S_N2@P$  reactions. Bond lengths/distances are in Å.

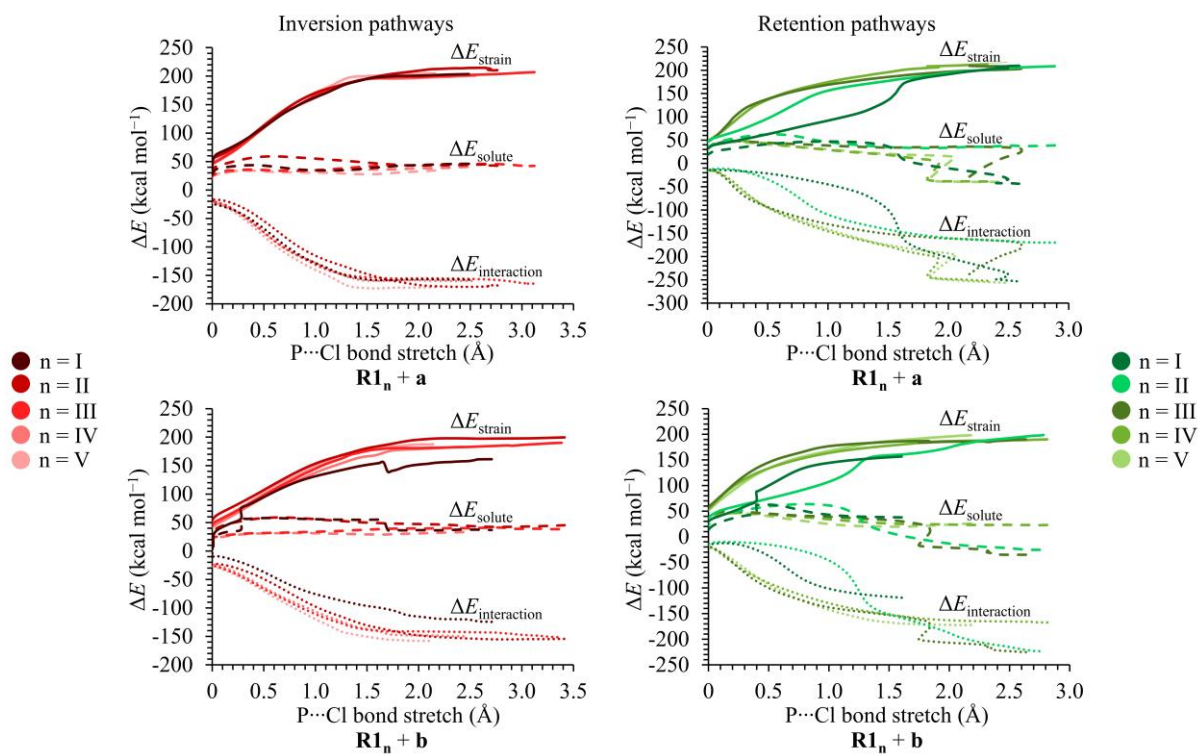

Figure S10: ASDs of the inversion and retention pathways of the  $\mathbf{R1}_n + \mathbf{a}$  and  $\mathbf{R1}_n + \mathbf{b}$   $S_N2@P$  reactions in THF.

## S.5 THF-solvated $R1_n + b$ $S_N2@Cl$ reactions

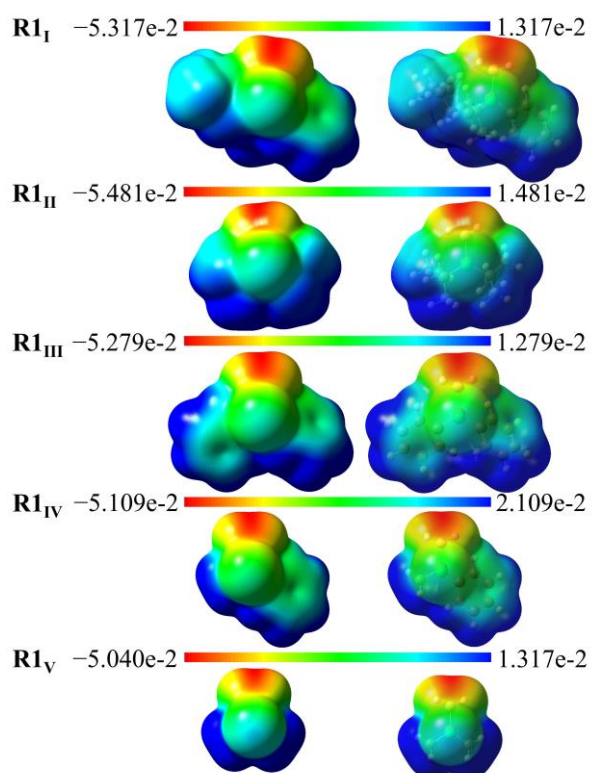

Figure S11: ESP maps (electrostatic potential in au) in THF showing the  $\sigma$ -hole at the extremity of the Cl atom.



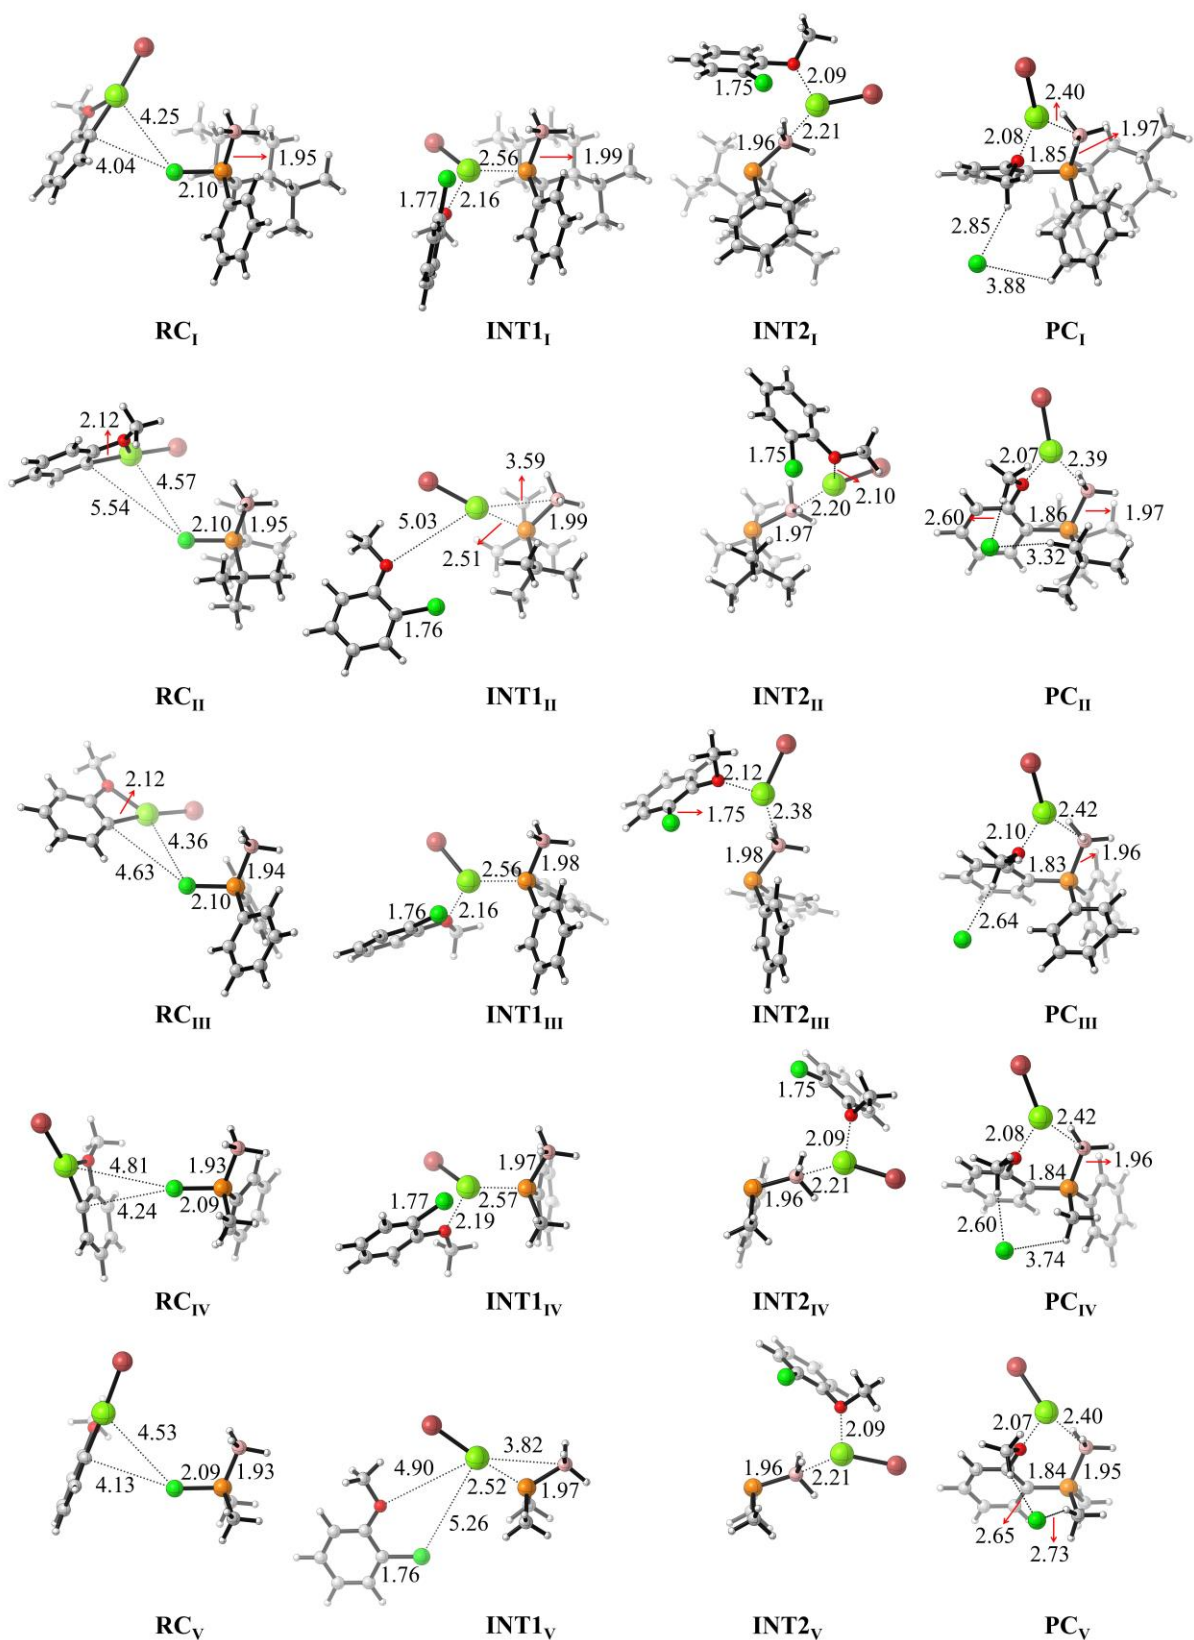

Figure S12 RCs, INTs and PCs of the  $S_N2@Cl$ ,  $S_N2@C-f$  mechanisms in THF.

## S.6 Gas-phase $R1_n + b$ $S_{N2}@Cl$ reactions

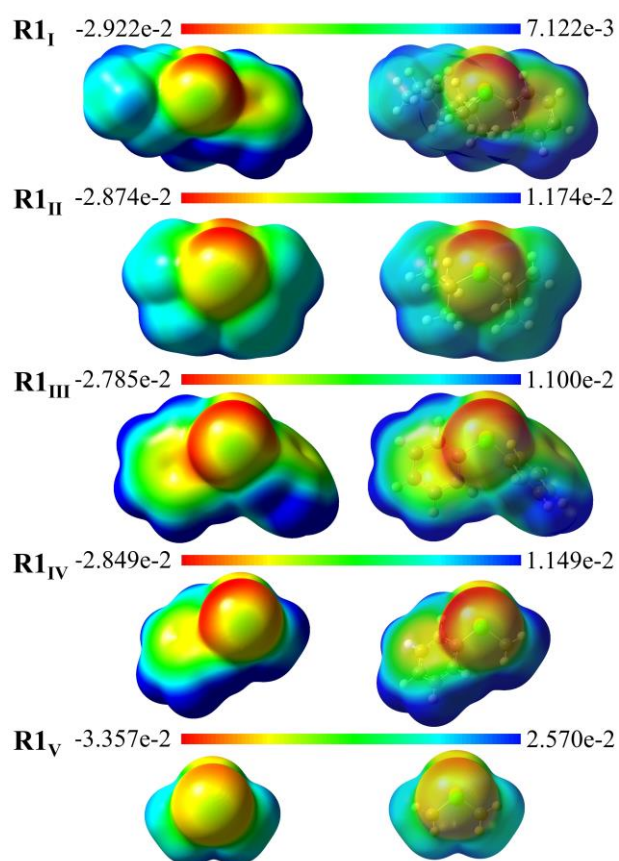

Figure S13: ESP maps (electrostatic potential in au) in the gas phase showing the  $\sigma$ -hole at the extremity of the Cl atom.

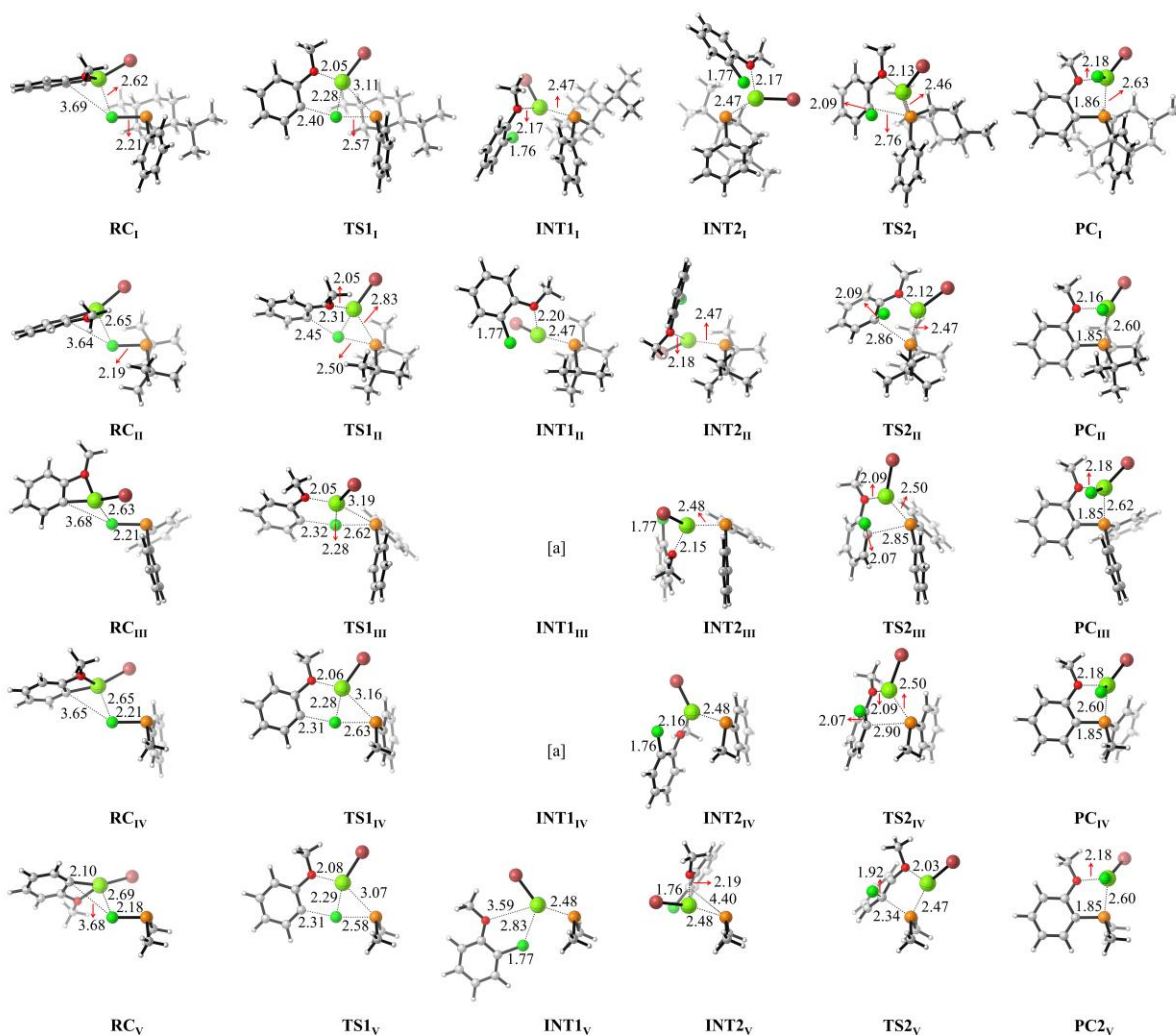

Figure S14: Geometries of the RCs, TSs, INTs, PCs and Ps of the gas-phase  $S_N2@Cl$  and  $S_N2@C-f$  pathways of the  $R1 + b$  reaction. Bond lengths/distances are in Å.

Table S3:  $\Delta G$  of the RCs, TSs, INTs, PCs and Ps of the gas-phase  $S_N2@Cl$  and  $S_N2@C-f$  pathways in kcal mol<sup>-1</sup>.

| <b><math>S_N2@Cl</math> pathway</b>  |                       |                        |                         |                        |                       |
|--------------------------------------|-----------------------|------------------------|-------------------------|------------------------|-----------------------|
|                                      | <b>R1<sub>I</sub></b> | <b>R1<sub>II</sub></b> | <b>R1<sub>III</sub></b> | <b>R1<sub>IV</sub></b> | <b>R1<sub>V</sub></b> |
| <b>RC</b>                            | -1.0                  | +1.7                   | +1.1                    | +1.6                   | +2.5                  |
| <b>TS1</b>                           | +43.1                 | +47.1                  | +44.6                   | +46.5                  | +50.9                 |
| <b>INT1</b>                          | +8.8                  | +14.6                  | [a]                     | [a]                    | +27.4                 |
| <b><math>S_N2@C-f</math> pathway</b> |                       |                        |                         |                        |                       |
| <b>INT2</b>                          | +11.4                 | +13.7                  | +9.9                    | +12.2                  | +17.7                 |
| <b>TS2</b>                           | +38.7                 | +42.1                  | +33.8                   | +35.3                  | +45.0                 |
| <b>PC</b>                            | -38.7                 | -43.1                  | -45.9                   | -44.4                  | -44.3                 |
| <b>P</b>                             | -18.1                 | -14.2                  | -20.0                   | -20.3                  | -20.4                 |

[a] INT1<sub>n</sub> converged to INT2<sub>n</sub> (n = III and IV).

A comparison of the Table S3 with Table S1 shows that the  $S_N2@Cl$  mechanisms are accompanied by higher Gibbs free activation energies than the  $S_N2@P$  mechanisms. Hence, the  $R1_n + b$  reactions occur *via* an  $S_N2@P$  mechanism in the gas phase.

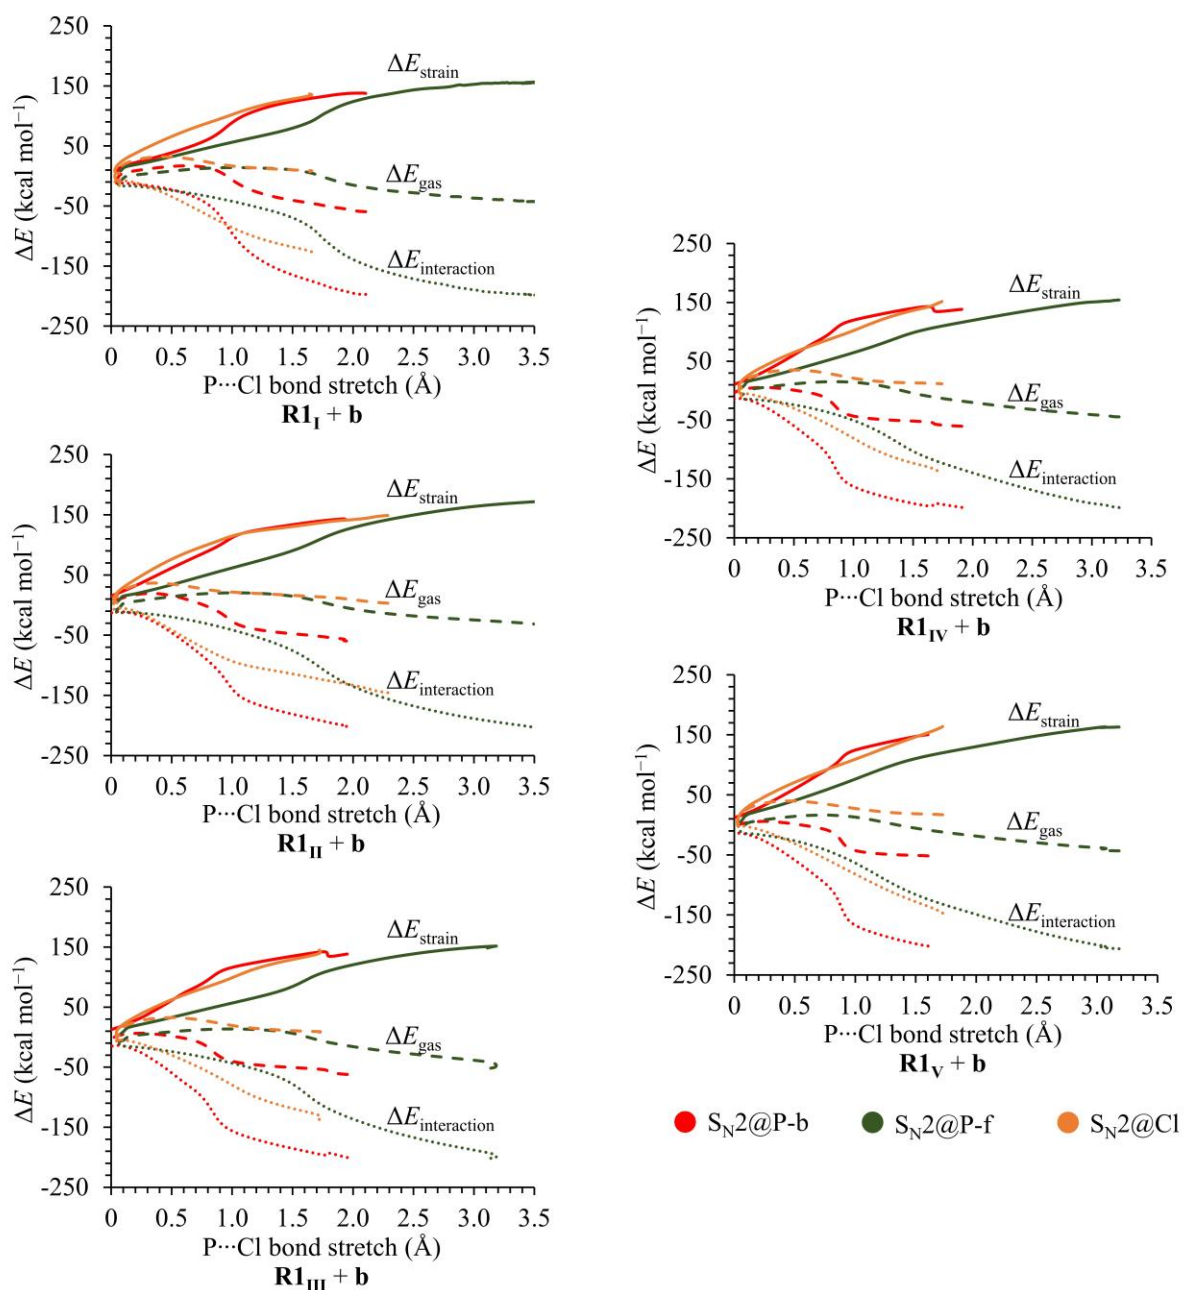

Figure S15: ASDs of the  $S_N2@P-b$ ,  $S_N2@P-f$  and  $S_N2@Cl$  pathways of the  $R1_n + b$  reactions in the gas phase.

## S.7 $\mathbf{R1}_n + \mathbf{a}$ $\text{S}_{\text{N}2@}\text{Cl}$ reaction

We also attempted to locate the TS of the  $\text{S}_{\text{N}2@}\text{Cl}$  mechanism of the  $\mathbf{R1}_n + \mathbf{a}$  reaction to compare with the  $\text{S}_{\text{N}2@}\text{P}$  pathways. However, the guess TS fails to converge. We attributed this to the fact that the  $\sigma$ -hole on the Cl atom is not attracted to the electron density on nucleophile **a**, which is lower than that of **b**.

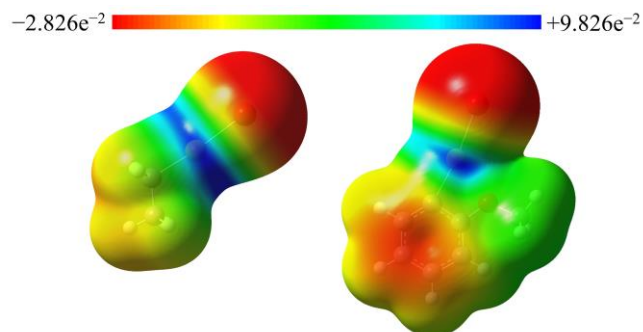

Figure S16: ESP maps of the nucleophiles **a** and **b**.

## S.8 Alternative gas-phase S<sub>N</sub>2@P reactions

Tables S4 and S5 list the gas-phase  $\Delta G$ , in kcal mol<sup>-1</sup>, of the RCs, TSs, PCs and Ps along the PES of alternative inversion and retention pathways of the S<sub>N</sub>2@P reactions of reactants **R1<sub>n</sub>** with the aliphatic and aromatic ion-pair nucleophiles **a** and **b**, respectively. The relative electronic energies ( $\Delta E$ ) are in parentheses in kcal mol<sup>-1</sup>. The alternative pathways are labelled as 2, 3 and so on. Figures S13–S16 show the RCs, TSs and PCs of the alternative gas-phase S<sub>N</sub>2@P reactions.

Table S4:  $\Delta G$ , in kcal mol<sup>-1</sup>, of the RCs, TSs, PCs and Ps along the PES of the alternative S<sub>N</sub>2@P reactions of **R1<sub>n</sub>** with nucleophile **a** in the gas phase.  $\Delta E$  are in parentheses in kcal mol<sup>-1</sup>.

| <b>Inversion pathway</b> |              |               |               |               |
|--------------------------|--------------|---------------|---------------|---------------|
| <b>Pathways</b>          | <b>RC</b>    | <b>TS</b>     | <b>PC</b>     | <b>P</b>      |
| <b>Ia-i 2</b>            | -1.9 (-13.4) | +31.6 (+18.1) | -49.8 (-62.3) | -33.4 (-35.5) |
| <b>Ia-i 3</b>            | -2.4 (-13.5) | +34.6 (+21.0) | -46.3 (-59.1) | -33.4 (-35.5) |
| <b>IIa-i 2</b>           | -0.8 (-12.2) | +32.3 (+19.2) | -48.6 (-61.3) | -30.9 (-33.3) |
| <b>IIa-i 3</b>           | +0.6 (-11.1) | +32.8 (+21.4) | -48.7 (-61.0) | -30.9 (-33.3) |
| <b>IIIa-i 2</b>          | +0.7 (-11.2) | +26.1 (+12.5) | -52.2 (-63.9) | -37.8 (-39.6) |
| <b>IVa-i 2</b>           | -0.5 (-10.6) | +23.1 (+10.5) | -51.5 (-63.3) | -37.1 (-38.5) |
| <b>IVa-i 3</b>           | +0.3 (-10.3) | +27.4 (+16.7) | -51.0 (-62.2) | -37.1 (-38.5) |
| <b>Va-i 2</b>            | -0.1 (-9.7)  | +31.8 (+21.2) | -50.8 (-61.4) | -36.7 (-38.3) |
| <b>Retention pathway</b> |              |               |               |               |
| <b>Ia-r 2</b>            | +2.6 (-8.4)  | +25.4 (+13.8) | -54.2 (-66.7) | -33.4 (-35.5) |
| <b>IIa-r 2</b>           | +3.6 (-6.2)  | +37.4 (+25.6) | -48.5 (-61.3) | -30.9 (-33.3) |
| <b>IIIa-r 2</b>          | +2.7 (-9.4)  | +24.8 (+13.1) | -50.4 (-62.9) | -37.6 (-39.5) |
| <b>IIIa-r 3</b>          | +2.8 (-7.1)  | +24.1 (+12.6) | -40.8 (-53.3) | -37.6 (-39.5) |
| <b>IVa-r 2</b>           | +2.2 (-6.9)  | +25.9 (+15.0) | -32.9 (-42.9) | -37.2 (-38.8) |
| <b>IVa-r 3</b>           | +2.8 (-6.5)  | +26.1 (+15.1) | -40.3 (-51.5) | -37.1 (-38.5) |
| <b>Va-r 2</b>            | -0.5 (-9.8)  | +27.8 (+16.5) | -50.7 (-61.6) | -36.7 (-38.3) |

(a) Gas-phase  $\mathbf{R1}_I + \mathbf{a}$   $S_N2@P$ -b pathways

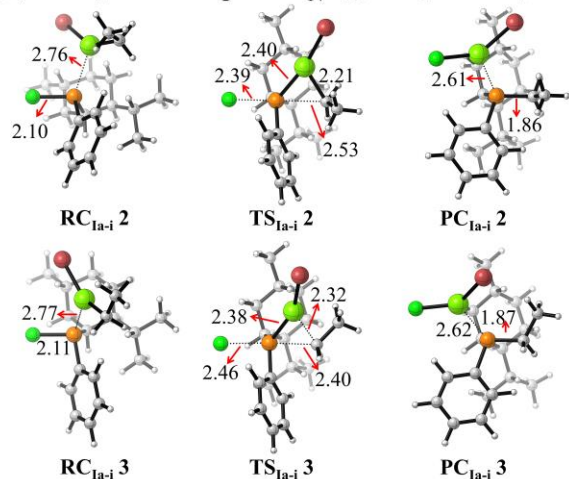

(b) Gas-phase  $\mathbf{R1}_{II} + \mathbf{a}$   $S_N2@P$ -b pathways

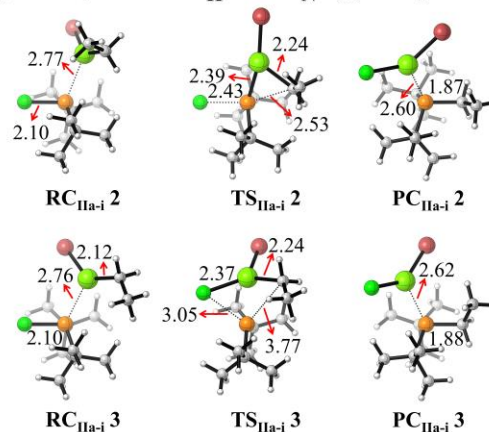

(c) Gas-phase  $\mathbf{R1}_{III} + \mathbf{a}$   $S_N2@P$ -b pathways

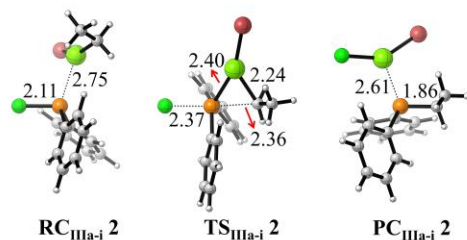

(d) Gas-phase  $\mathbf{R1}_{IV} + \mathbf{a}$   $S_N2@P$ -b pathways

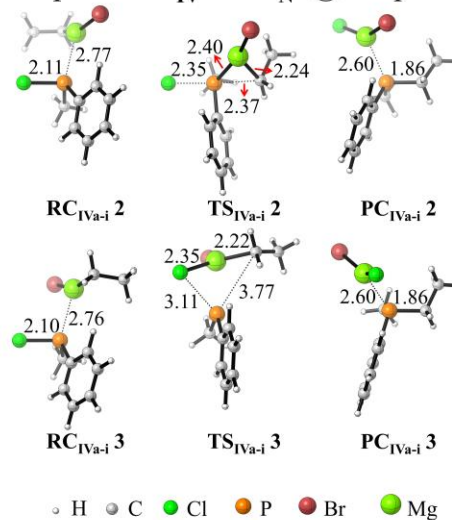

(e) Gas-phase  $\mathbf{R1}_V + \mathbf{a}$   $S_N2@P$ -b pathways

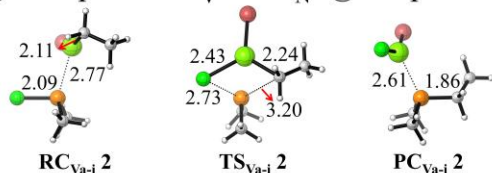

Figure S17: Alternative gas-phase  $S_N2@P$ -b pathways of the  $\mathbf{R1}_n + \mathbf{a}$  reactions. Bond lengths/distances are in Å.

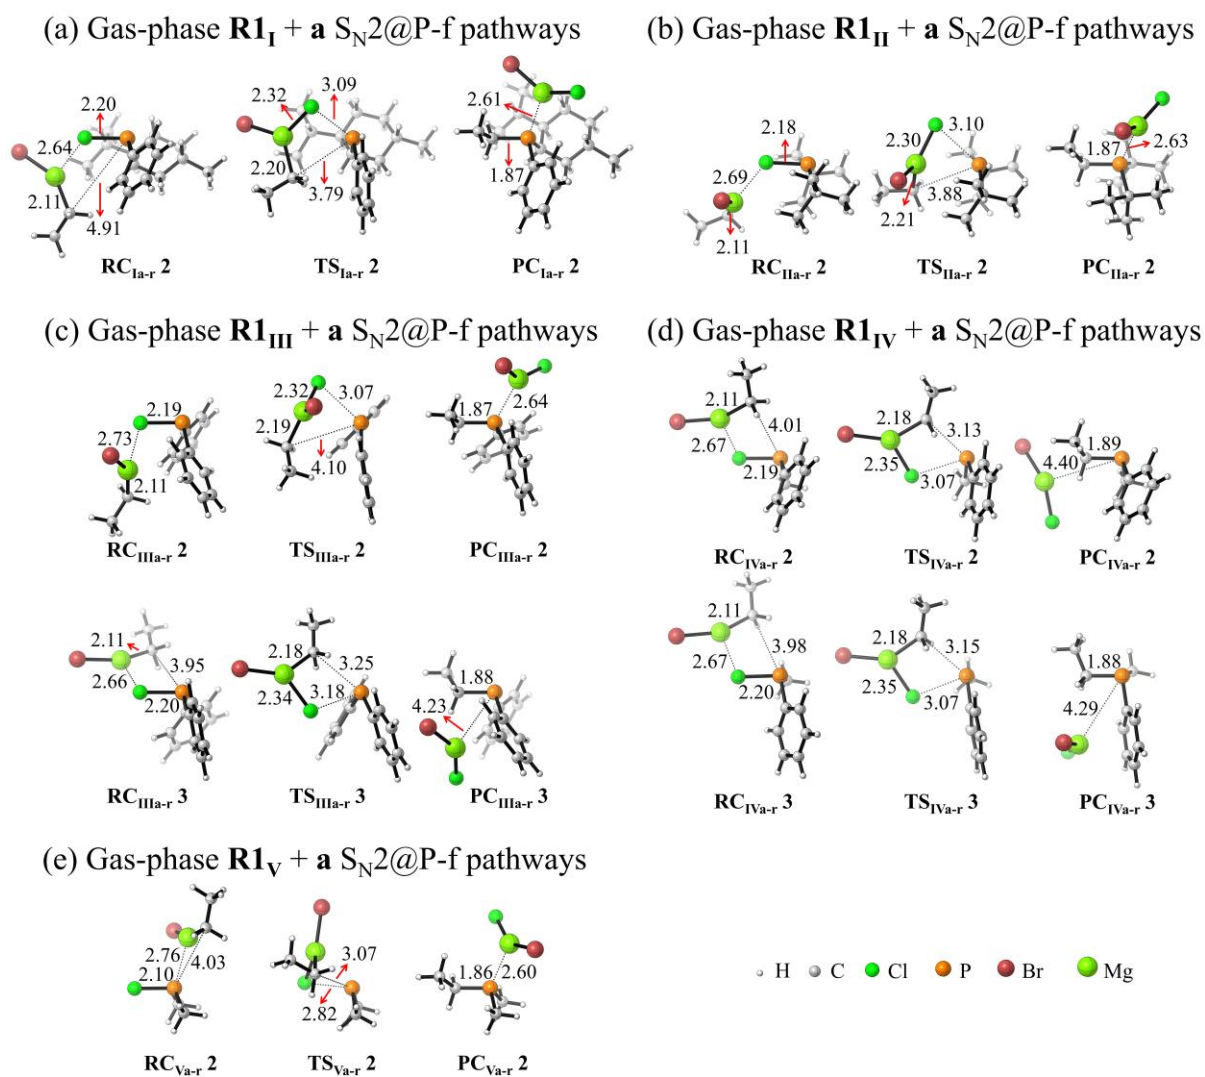

Figure S18: Alternative gas-phase  $S_N2@P$ -f pathways of the  $\mathbf{R1}_n + \mathbf{a}$  reactions. Bond lengths/distances are in Å.



Table S5:  $\Delta G$ , in kcal mol<sup>-1</sup>, of the RCs, TSs, PCs and Ps along the PES of the alternative **R1<sub>n</sub> + b** **S<sub>N</sub>2@P** reactions in the gas phase.  $\Delta E$  are in parentheses in kcal mol<sup>-1</sup>.

| <b>Inversion pathway</b> |              |               |               |               |
|--------------------------|--------------|---------------|---------------|---------------|
| <b>Pathways</b>          | <b>RC</b>    | <b>TS</b>     | <b>PC</b>     | <b>P</b>      |
| <b>Ib-i 2</b>            | +0.4 (-11.4) | +30.4 (+16.0) | -37.1 (-51.8) | -17.5 (-19.3) |
| <b>Ib-i 3</b>            | +5.7 (-5.8)  | +37.6 (+23.0) | +27.5 (+14.1) | -18.8 (-20.3) |
| <b>IIb-i 2</b>           | -1.3 (-12.8) | +42.6 (+28.7) | -31.4 (-44.9) | -14.2 (-16.7) |
| <b>IIb-i 3</b>           | -1.7 (-12.6) | +34.8 (+22.9) | -43.3 (-57.4) | -14.2 (-16.7) |
| <b>IIIb-i 2</b>          | +2.3 (-8.2)  | +27.6 (+15.1) | -46.5 (-60.1) | -22.3 (-24.5) |
| <b>IVb-i 2</b>           | -0.8 (-11.3) | +20.1 (+7.8)  | -44.9 (-57.5) | -21.2 (-22.9) |
| <b>IVb-i 3</b>           | +2.4 (-10.0) | +27.1 (+14.5) | -44.9 (-57.5) | -21.2 (-22.9) |
| <b>Vb-i 2</b>            | +3.5 (-6.4)  | +31.1 (+19.1) | -44.8 (-56.8) | -20.4 (-22.1) |
| <b>Retention pathway</b> |              |               |               |               |
| <b>Ib-r 2</b>            | +2.4 (-8.6)  | +31.6 (+19.0) | -43.6 (-57.6) | -18.1 (-20.3) |
| <b>IVb-r 2</b>           | +2.9 (-6.9)  | +28.8 (+16.3) | -35.0 (-48.8) | -21.4 (-22.8) |
| <b>IVb-r 3</b>           | +3.0 (-6.8)  | +32.4 (+20.8) | -26.3 (-38.7) | -21.4 (-22.8) |
| <b>IVb-r 4</b>           | +0.6 (-10.3) | +30.5 (+18.6) | -27.9 (-40.8) | -21.2 (-22.9) |
| <b>IVb-r 5</b>           | +2.6 (-7.1)  | +32.4 (+21.4) | -24.8 (-36.9) | -21.2 (-22.9) |
| <b>IVb-r 6</b>           | +3.0 (-6.8)  | +30.9 (+19.8) | -28.4 (-40.3) | -21.4 (-22.8) |
| <b>Vb-r 2</b>            | +3.5 (-6.4)  | +30.3 (+18.3) | -29.7 (-41.8) | -20.4 (-22.1) |

(a) Gas-phase  $\mathbf{R1}_I + \mathbf{b}$   $S_N2@P$ -b pathways

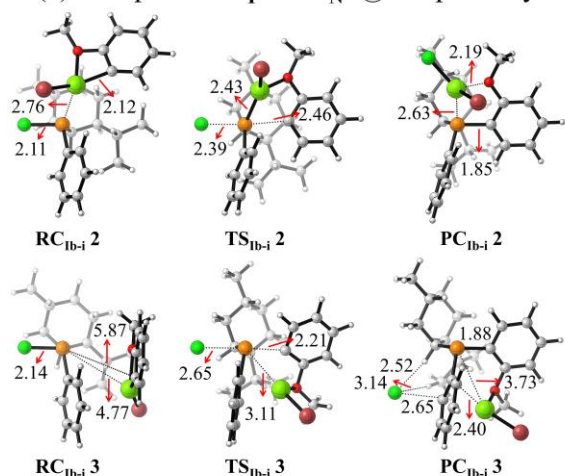

(b) Gas-phase  $\mathbf{R1}_{II} + \mathbf{b}$   $S_N2@P$ -b pathways

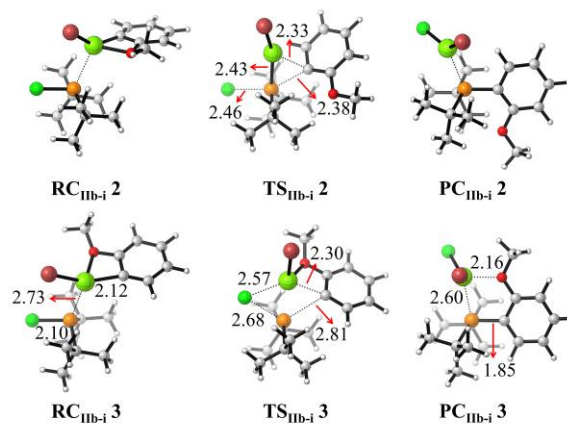

(c) Gas-phase  $\mathbf{R1}_{III} + \mathbf{b}$   $S_N2@P$ -b pathways

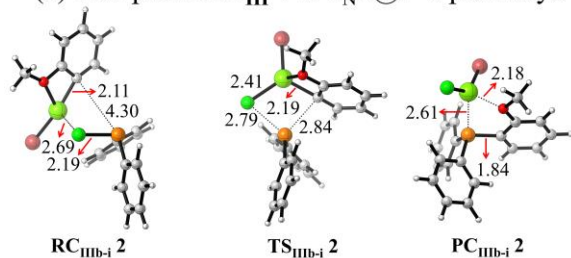

(d) Gas-phase  $\mathbf{R1}_{IV} + \mathbf{b}$   $S_N2@P$ -b pathways

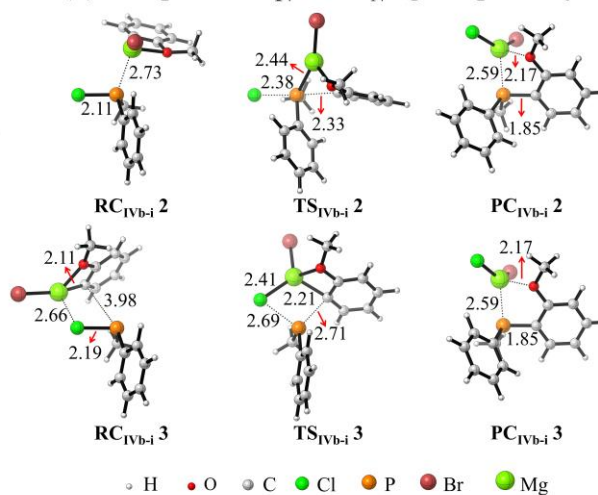

(e) Gas-phase  $\mathbf{R1}_V + \mathbf{b}$   $S_N2@P$ -b pathways

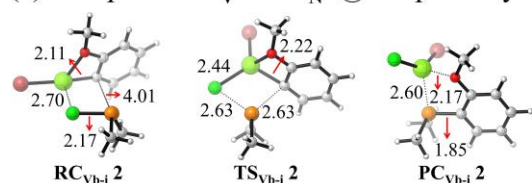

Figure S19: Alternative gas-phase  $S_N2@P$ -b pathways of the  $\mathbf{R1}_n + \mathbf{b}$  reactions. Bond lengths/distances are in Å.

(a) Gas-phase  $\mathbf{R1}_I + \mathbf{b}$   $\text{S}_N2@P$ -f pathways

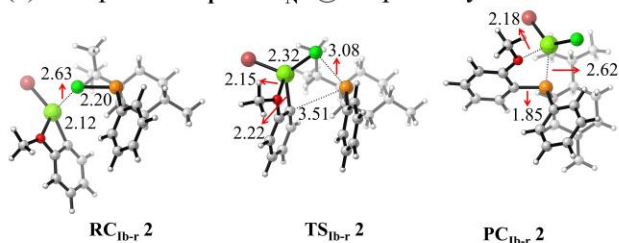

(c) Gas-phase  $\mathbf{R1}_V + \mathbf{b}$   $\text{S}_N2@P$ -f pathways

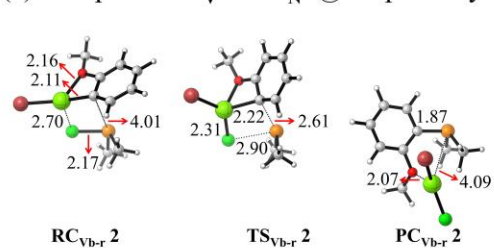

(b) Gas-phase  $\mathbf{R1}_{IV} + \mathbf{b}$   $\text{S}_N2@P$ -f pathways

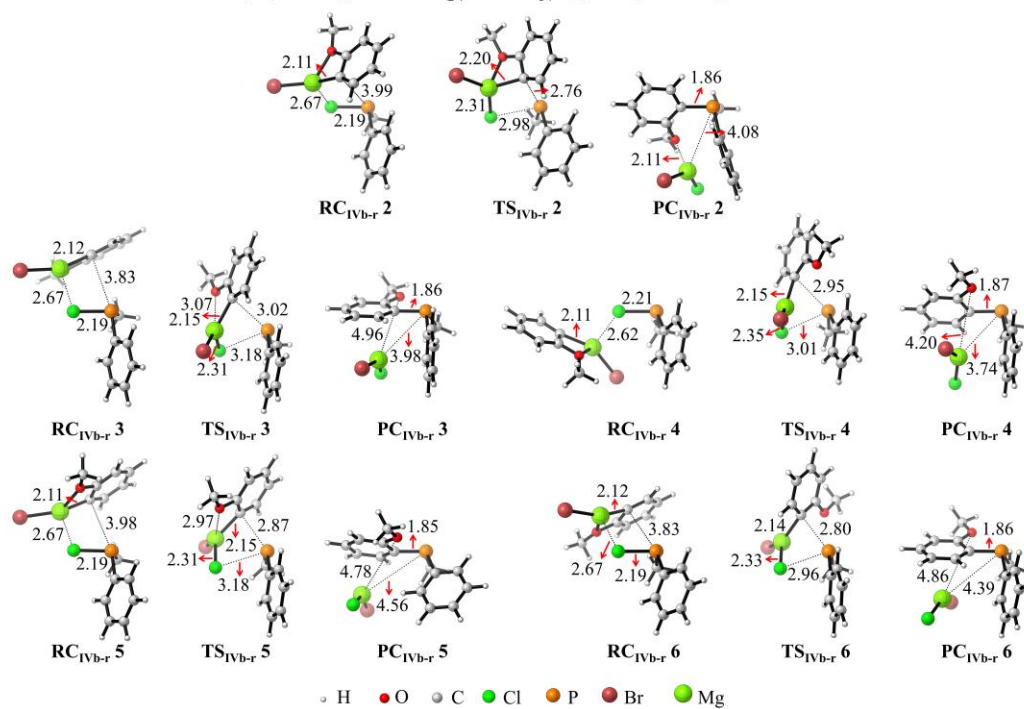

Figure S20: Alternative gas-phase  $\text{S}_N2@P$ -f pathways of the  $\mathbf{R1}_n + \mathbf{b}$  reactions. Bond lengths/distances are in Å.

## S.9 Alternative THF-solvated S<sub>N</sub>2@P reactions

Tables S6 and S7 list the THF-solvated  $\Delta G$ , in kcal mol<sup>-1</sup>, of the RCs, TSs, PCs and Ps along the PES of alternative inversion and retention pathways of the S<sub>N</sub>2@P reactions of **R1<sub>n</sub>** with the aliphatic and aromatic ion-pair nucleophiles **a** and **b**, respectively. The relative electronic energies ( $\Delta E$ ) are in parentheses in kcal mol<sup>-1</sup>. The alternative pathways are labelled as 2, 3 and so on. Figures S21–S24 show the RCs, TSs and PCs of the alternative THF-solvated S<sub>N</sub>2@P reactions.

Table S6:  $\Delta G$ , in kcal mol<sup>-1</sup>, of the RCs, TSs, PCs and Ps along the alternative inversion and retention pathways of the **R1<sub>n</sub>** + **a** S<sub>N</sub>2@P reactions in THF.  $\Delta E$  are in parentheses in kcal mol<sup>-1</sup>.

| <b>Inversion pathway</b> |              |               |               |               |
|--------------------------|--------------|---------------|---------------|---------------|
| <b>Pathways</b>          | <b>RC</b>    | <b>TS</b>     | <b>PC</b>     | <b>P</b>      |
| <b>Ia-i 2</b>            | +5.1 (-4.4)  | +57.5 (+41.9) | -37.6 (-48.5) | -42.6 (-45.8) |
| <b>Ia-i 3</b>            | +8.7 (-2.6)  | +45.4 (+30.8) | -44.8 (-57.1) | -47.3 (-50.3) |
| <b>Ia-i 4</b>            | +5.1 (-4.4)  | +61.7 (+46.2) | -36.2 (-48.6) | -47.3 (-50.3) |
| <b>IIa-i 2</b>           | +7.0 (-2.6)  | +73.5 (+58.4) | -41.8 (-53.3) | -43.7 (-47.0) |
| <b>IIa-i 3</b>           | +6.4 (-3.0)  | +58.0 (+44.5) | -40.4 (-51.4) | -43.7 (-47.0) |
| <b>IIIa-i 2</b>          | +7.7 (-0.6)  | +36.1 (+22.7) | +2.7 (-8.6)   | -50.8 (-53.6) |
| <b>IVa-i 2</b>           | +9.7 (-0.7)  | +31.8 (+17.9) | -48.9 (-60.5) | -50.4 (-52.9) |
| <b>IVa-i 3</b>           | +7.1 (-1.1)  | +34.9 (+22.8) | -48.7 (-60.7) | -50.4 (-52.9) |
| <b>IVa-i 4</b>           | +7.9 (-1.0)  | +43.1 (+28.9) | -46.4 (-57.5) | -50.8 (-53.3) |
| <b>Va-i 2</b>            | +8.3 (+0.1)  | +51.0 (+37.2) | -44.4 (-53.4) | -49.9 (-52.6) |
| <b>Retention pathway</b> |              |               |               |               |
| <b>IVa-r 2</b>           | +10.3 (+0.1) | +44.5 (+31.2) | -49.2 (-60.8) | -50.8 (-53.3) |

(a) THF-solvated  $\mathbf{R1}_I + \mathbf{a}$   $S_N2@P$ -b pathways

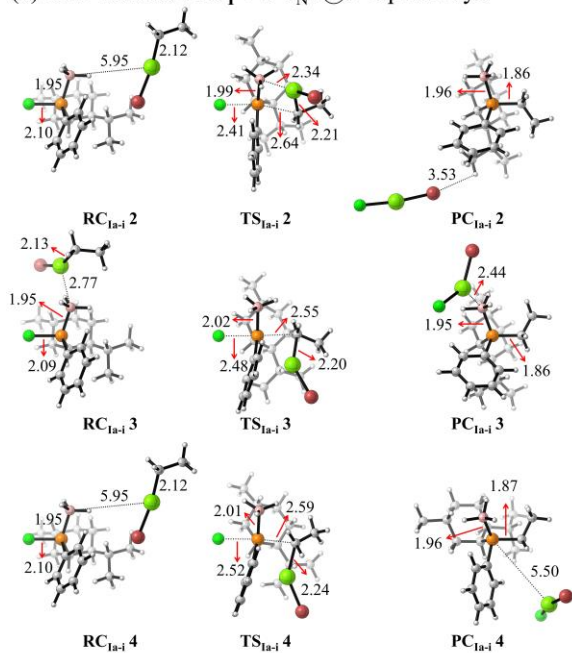

(b) THF-solvated  $\mathbf{R1}_{II} + \mathbf{a}$   $S_N2@P$ -b pathways

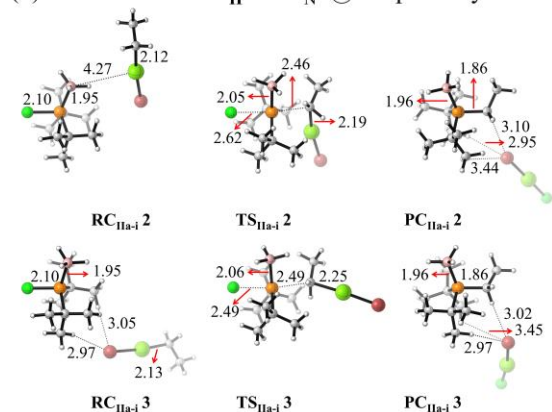

(c) THF-solvated  $\mathbf{R1}_{III} + \mathbf{a}$   $S_N2@P$ -b pathways

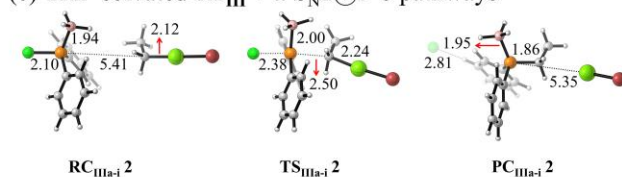

(d) THF-solvated  $\mathbf{R1}_{IV} + \mathbf{a}$   $S_N2@P$ -b pathways

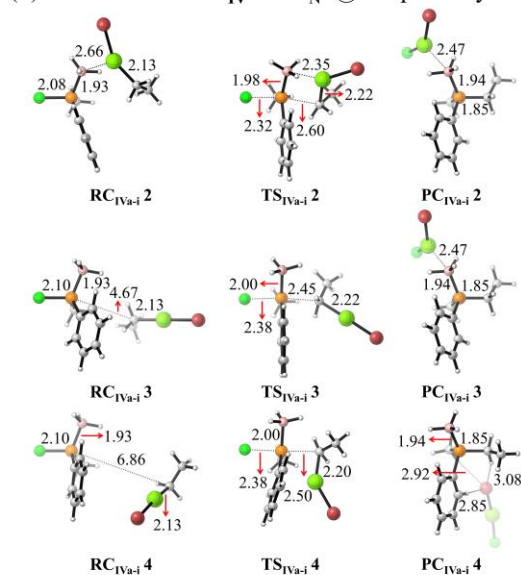

(e) THF-solvated  $\mathbf{R1}_V + \mathbf{a}$   $S_N2@P$ -b pathways

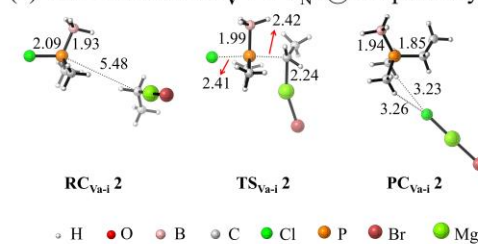

○ H    ● O    ● B    ● C    ● Cl    ● P    ● Br    ● Mg

Figure S21: Alternative THF-solvated  $S_N2@P$ -b pathways of  $\mathbf{R1}_n + \mathbf{a}$  reactions. Bond lengths/distances are in Å.

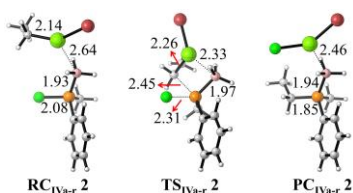

Figure S22: Alternative THF-solvated  $S_N2@P$ -f pathways of  $\mathbf{R1}_{IV} + \mathbf{a}$  reaction. Bond lengths/distances are in Å.

Table S7:  $\Delta G$ , in kcal mol<sup>-1</sup>, of the RCs, TSs, PCs and Ps along the alternative inversion and retention pathways of the **R1<sub>n</sub>** + **b** S<sub>N</sub>2@P reactions in THF.  $\Delta E$  are in parentheses in kcal mol<sup>-1</sup>

| Inversion pathway     |              |               |               |               |
|-----------------------|--------------|---------------|---------------|---------------|
| Pathways              | RC           | TS            | PC            | P             |
| <b>I<b>ib</b>-i 2</b> | +7.1 (-2.5)  | +73.1 (+57.8) | -17.3 (-32.6) | -29.4 (-33.3) |
| <b>IIIb-i 2</b>       | +7.6 (-4.2)  | +41.6 (+24.9) | -33.5 (-46.0) | -37.0 (-40.4) |
| <b>IVb-i 2</b>        | +8.7 (-2.1)  | +28.9 (+14.5) | -10.9 (-24.0) | -36.9 (-39.9) |
| <b>Vb-i 2</b>         | +7.7 (-0.4)  | +43.5 (+29.0) | +3.0 (-8.6)   | -37.6 (-40.7) |
| Retention pathway     |              |               |               |               |
| <b>I<b>ib</b>-r 2</b> | +5.9 (-6.0)  | +77.9 (+62.6) | +14.9 (+0.2)  | -33.7 (-37.2) |
| <b>I<b>ib</b>-r 3</b> | +8.6 (-3.2)  | +59.3 (+43.7) | -5.5 (-20.7)  | -29.8 (-33.3) |
| <b>I<b>ib</b>-r 4</b> | +5.0 (-5.4)  | +78.4 (+63.3) | -20.7 (-33.7) | -33.7 (-37.2) |
| <b>IIIb-r 2</b>       | +9.8 (-1.1)  | +51.4 (+37.2) | -34.0 (-47.7) | -36.6 (-40.3) |
| <b>IIIb-r 3</b>       | +11.2 (-0.2) | +51.2 (+37.0) | -32.5 (-46.3) | -36.6 (-40.3) |
| <b>IVb-r 2</b>        | +9.3 (-2.1)  | +48.9 (+34.3) | -37.2 (-50.4) | -36.5 (-39.5) |
| <b>IVb-r 3</b>        | +9.4 (-1.3)  | +46.8 (+32.2) | -11.6 (-24.6) | -36.5 (-39.5) |
| <b>IVb-r 4</b>        | +9.5 (-1.0)  | +49.6 (+36.1) | -38.3 (-52.0) | -36.5 (-39.5) |
| <b>Vb-r 2</b>         | +8.1 (-1.0)  | +48.4 (+34.9) | -36.2 (-48.4) | -37.6 (-40.7) |

(a) THF-solvated **R1<sub>II</sub>** + **b** S<sub>N</sub>2@P-b pathways

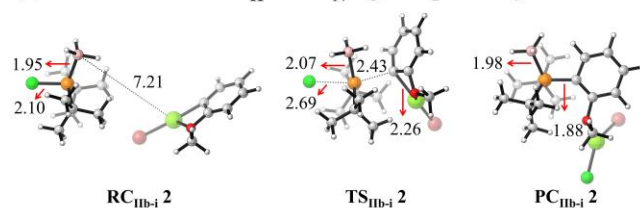

(c) THF-solvated **R1<sub>IV</sub>** + **b** S<sub>N</sub>2@P-b pathways

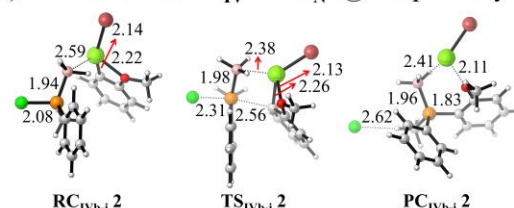

(b) THF-solvated **R1<sub>III</sub>** + **b** S<sub>N</sub>2@P-b pathways

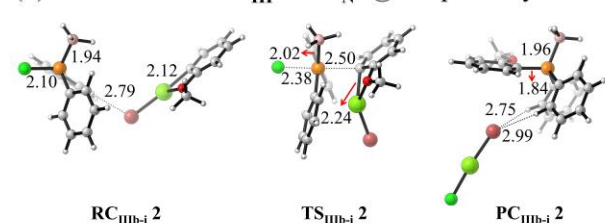

(d) THF-solvated **R1<sub>V</sub>** + **b** S<sub>N</sub>2@P-b pathways

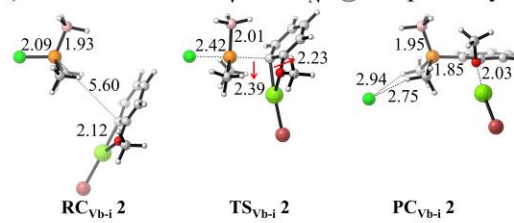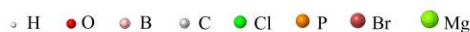

Figure S23: Alternative THF-solvated S<sub>N</sub>2@P-b pathways of **R1<sub>n</sub>** + **b** reactions. Bond lengths/distances are in Å.

(a) THF-solvated  $\mathbf{R1}_I + \mathbf{b}$   $S_N2@P$ -f pathways

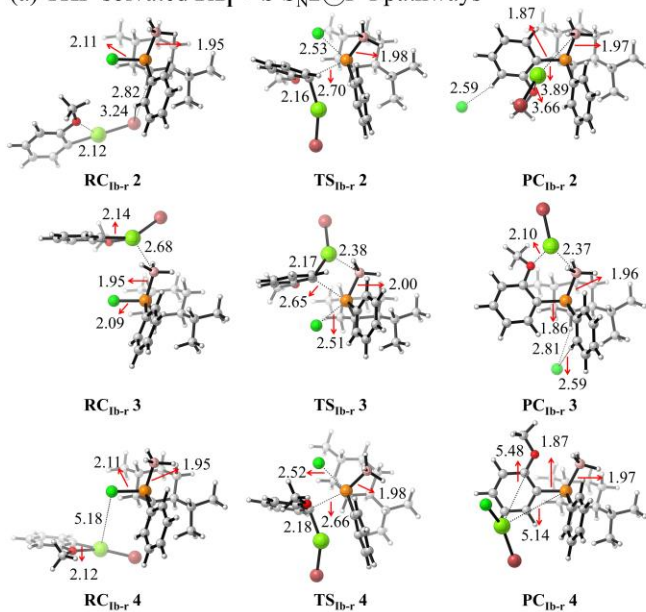

(c) THF-solvated  $\mathbf{R1}_{IV} + \mathbf{b}$   $S_N2@P$ -f pathways

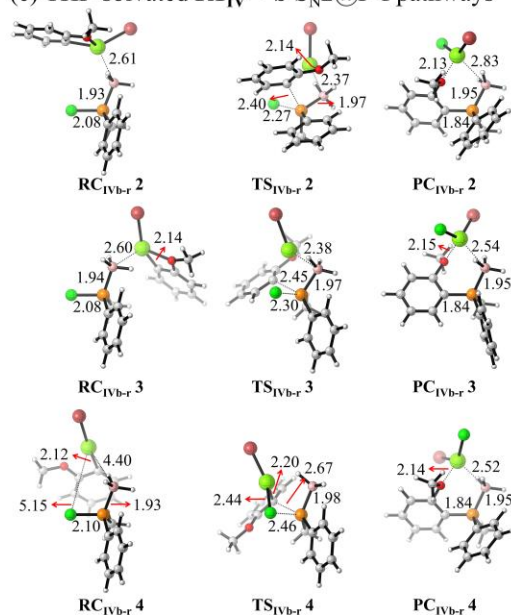

(b) THF-solvated  $\mathbf{R1}_{III} + \mathbf{b}$   $S_N2@P$ -f pathways

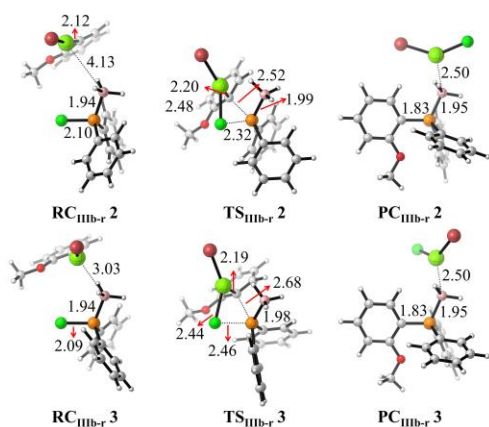

(d) THF-solvated  $\mathbf{R1}_V + \mathbf{b}$   $S_N2@P$ -f pathways

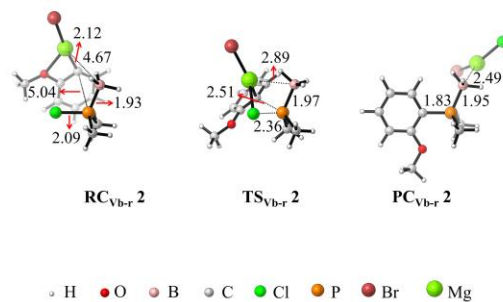

Figure S24: Alternative THF-solvated  $S_N2@P$ -f pathways of  $\mathbf{R1}_n + \mathbf{b}$  reactions. Bond lengths/distances are in Å.

## S.9 Noncovalent interactions

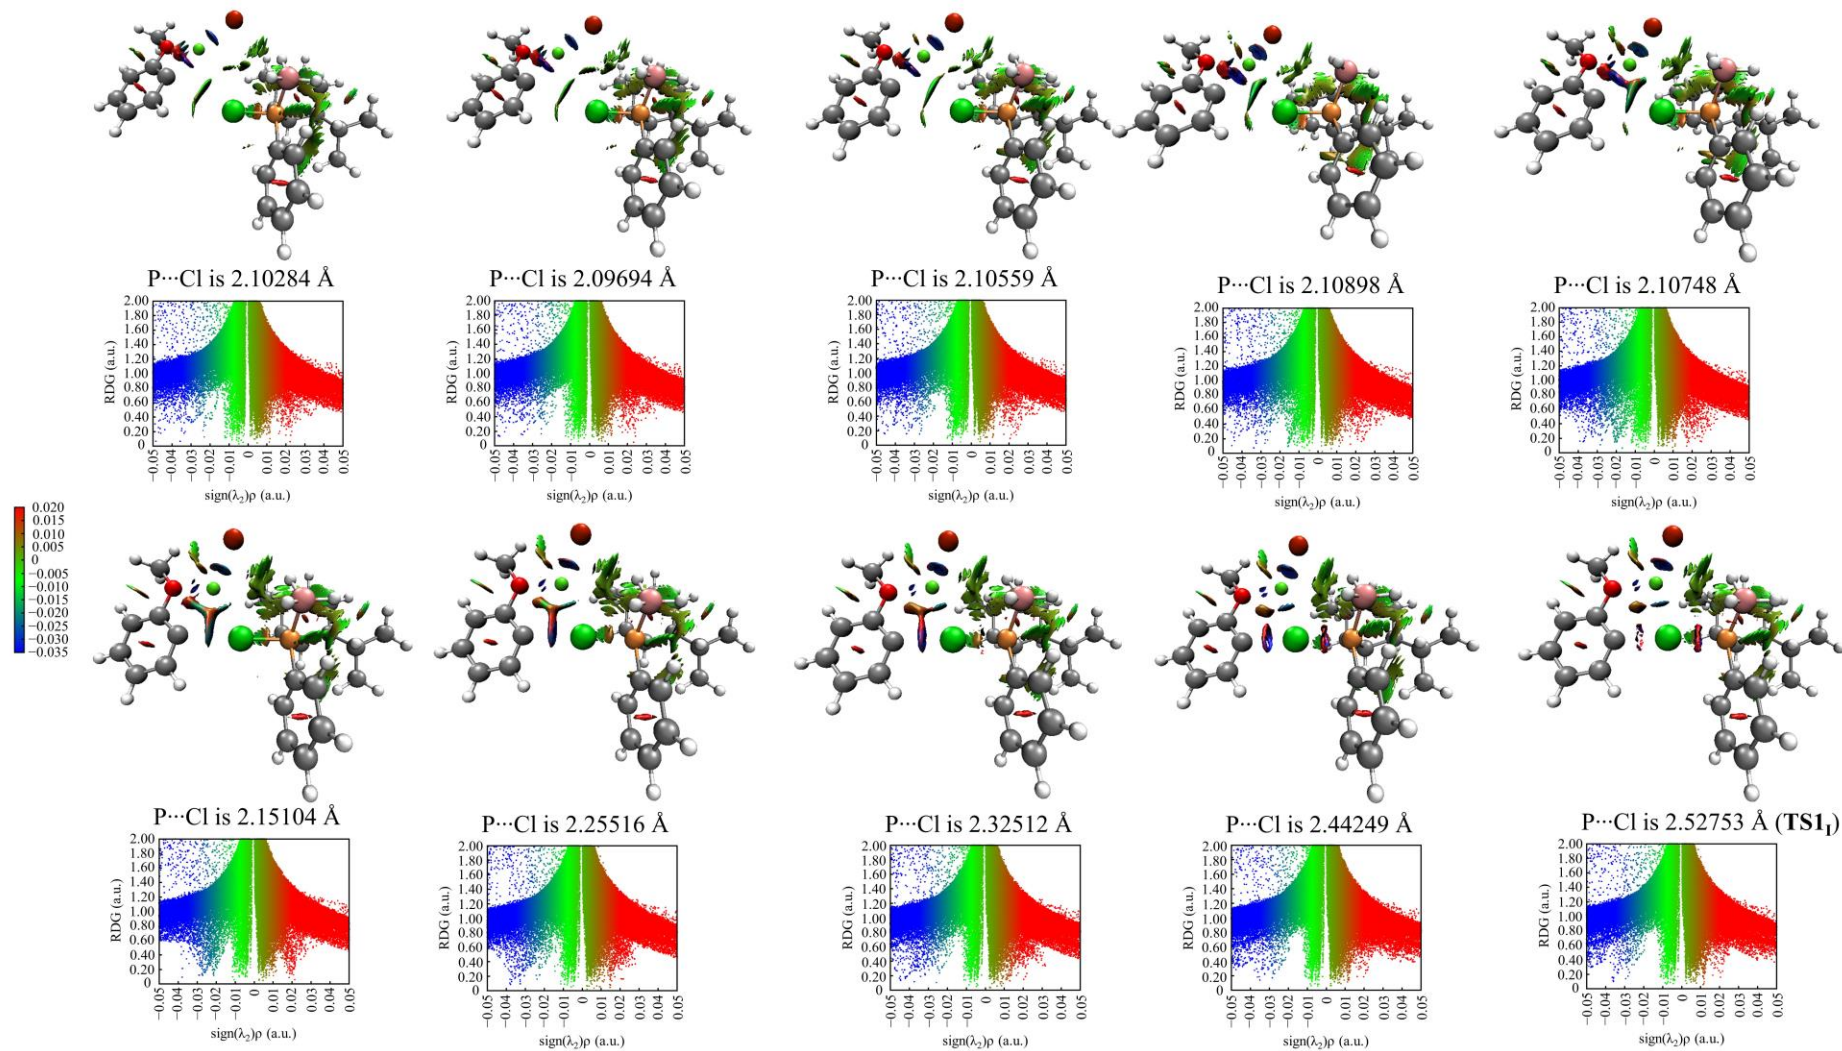

Figure S25: 2D and 3D plots of the NCI isosurfaces of along the first part of the PES of the  $\mathbf{R1I} + \mathbf{b} \text{ S}_{\text{N}}2@Cl$  mechanism in THF.



The isosurfaces in Figure S25 show the evolution of the interaction between the Cl atom and the nucleophile **b** along the first part of the PES of the **R1<sub>I</sub>** + **b** S<sub>N</sub>2@Cl mechanism in THF. At the start of the reaction, there are van der Waals forces of attraction between the Cl atom of **R1<sub>I</sub>** and phenyl ring of **b**, shown by the green isosurface. As the reaction proceeds towards the TS, the green isosurface becomes blue, which depicts attraction between the Cl atom of **R1<sub>I</sub>** and the C atom of **b**.

## S.11 Effect of temperature

We investigated the effect of temperature on the **RI**<sub>1</sub> + **a** and **RI**<sub>1</sub> + **b** reactions with a frequency computation of the optimised geometries at 193.15 K (−80 °C) both in the gas phase and in THF. Tables S8–S9 list the  $\Delta G$  of the RCs, TSs and PCs of the inversion and retention pathways in kcal mol<sup>−1</sup>. Table S10 shows the  $\Delta G$  of the RC, TSs, INTs and PC of the halogen bond-assisted mechanism of the **RI**<sub>1</sub> + **b** reaction. The temperature of 193.15 K causes a decrease in the  $\Delta G$  along the PESs in both the gas phase and in THF. The trend in the preference of pathways remains similar to the trend observed at room temperature: the S<sub>N</sub>2@P-b inversion pathway is preferred by the **RI**<sub>1</sub> + **a** reaction and the halogen bond-assisted S<sub>N</sub>2@Cl, followed by S<sub>N</sub>2@C-f, is preferred by the **RI**<sub>1</sub> + **b** reaction.

Table S8:  $\Delta G$ , in kcal mol<sup>−1</sup>, of the RCs, TSs and PCs of the inversion and retention pathways of the **RI**<sub>1</sub> + **a** reaction in the gas phase at 193.15 K. The  $\Delta G$  at room temperature is in parentheses.

| <b>Inversion pathway</b>  |               |
|---------------------------|---------------|
| <b>RC</b> <sub>Ia-i</sub> | −5.6 (−1.5)   |
| <b>TS</b> <sub>Ia-i</sub> | +17.8 (+21.7) |
| <b>PC</b> <sub>Ia-i</sub> | −53.0 (−48.7) |
| <b>Retention pathway</b>  |               |
| <b>RC</b> <sub>Ia-r</sub> | −3.0 (+0.2)   |
| <b>TS</b> <sub>Ia-r</sub> | +17.7 (+21.7) |
| <b>PC</b> <sub>Ia-r</sub> | −38.1 (−33.9) |

Table S9:  $\Delta G$ , in kcal mol<sup>−1</sup>, of the RCs, TSs and PCs of the inversion and retention pathways of the **RI**<sub>1</sub> + **b** reaction in the gas phase at 193.15 K. The  $\Delta G$  at room temperature is in parentheses.

| <b>Inversion pathway</b>  |               |
|---------------------------|---------------|
| <b>RC</b> <sub>Ib-i</sub> | −1.6 (+1.9)   |
| <b>TS</b> <sub>Ib-i</sub> | +23.7 (+27.7) |
| <b>PC</b> <sub>Ib-i</sub> | −48.1 (−43.2) |
| <b>Retention pathway</b>  |               |
| <b>RC</b> <sub>Ib-r</sub> | −4.2 (−0.8)   |
| <b>TS</b> <sub>Ib-r</sub> | +21.7 (+25.9) |
| <b>PC</b> <sub>Ib-r</sub> | −32.6 (−28.0) |

Table S10:  $\Delta G$ , in kcal mol<sup>−1</sup>, of the RCs, TSs and PCs of the inversion and retention pathways of the **RI**<sub>1</sub> + **a** reaction in THF at 193.15 K. The  $\Delta G$  at room temperature is in parentheses.

| <b>Inversion pathway</b>  |               |
|---------------------------|---------------|
| <b>RC</b> <sub>Ia-i</sub> | +5.9 (+10.0)  |
| <b>TS</b> <sub>Ia-i</sub> | +36.6 (+41.7) |
| <b>PC</b> <sub>Ia-i</sub> | −15.4 (−11.0) |
| <b>Retention pathway</b>  |               |
| <b>RC</b> <sub>Ia-r</sub> | +4.5 (+8.3)   |
| <b>TS</b> <sub>Ia-r</sub> | +40.2 (+44.3) |
| <b>PC</b> <sub>Ia-r</sub> | −53.3 (−49.0) |

Table S11:  $\Delta G$ , in kcal mol<sup>-1</sup>, of the RCs, TSs and PCs of the inversion and retention pathways of the **R1<sub>I</sub> + b** reaction in THF at 193.15 K. The  $\Delta G$  at room temperature is in parentheses.

| <b>Inversion pathway</b> |               |
|--------------------------|---------------|
| <b>RC<sub>Ib-i</sub></b> | +4.3 (+8.1)   |
| <b>TS<sub>Ib-i</sub></b> | +48.2 (+53.9) |
| <b>PC<sub>Ib-i</sub></b> | +8.9 (+14.4)  |
| <b>Retention pathway</b> |               |
| <b>RC<sub>Ib-r</sub></b> | +3.1 (+6.9)   |
| <b>TS<sub>Ib-r</sub></b> | +54.0 (+59.1) |
| <b>PC<sub>Ib-r</sub></b> | +0.8 (+5.5)   |

Table S10:  $\Delta G$ , in kcal mol<sup>-1</sup>, of the RCs, TSs, INTs and PCs of halogen bond-assisted reaction mechanism for the **R1<sub>I</sub> + b** reaction in THF at 193.15 K. The  $\Delta G$  at room temperature is in parentheses.

|                         |               |
|-------------------------|---------------|
| <b>RC<sub>I</sub></b>   | +3.7 (+6.3)   |
| <b>TS1<sub>I</sub></b>  | +38.9 (+43.9) |
| <b>INT1<sub>I</sub></b> | +7.3 (+12.7)  |
| <b>INT2<sub>I</sub></b> | +6.0 (+9.7)   |
| <b>TS2<sub>I</sub></b>  | +48.7 (+54.2) |
| <b>PC<sub>I</sub></b>   | -9.1 (-4.2)   |

## S.12 Coordinates

### S.12.1 Gas-phase reactions in manuscript

#### R1r

E = -1425.796240    ZPVE = 0.365813    NIMAG = 0.

|   |           |           |           |
|---|-----------|-----------|-----------|
| 6 | 0.81644   | 0.000516  | 0.649576  |
| 6 | 2.331227  | 1.479196  | -0.77703  |
| 6 | 3.182969  | -0.80932  | -0.003498 |
| 6 | 2.073524  | -0.797421 | 1.06085   |
| 6 | 3.551436  | 0.633535  | -0.3795   |
| 6 | 0.037296  | 2.42615   | 0.000227  |
| 6 | 4.403533  | -1.605971 | 0.472841  |
| 6 | -0.898725 | 2.572395  | 1.213441  |
| 6 | 0.498544  | 3.826928  | -0.443976 |
| 1 | 0.13361   | 0.008471  | 1.504751  |
| 1 | 2.66441   | 2.50522   | -0.9577   |
| 1 | 1.921104  | 1.113249  | -1.728232 |
| 1 | 2.790154  | -1.306114 | -0.903303 |
| 1 | 1.801244  | -1.820437 | 1.33489   |
| 1 | 2.470803  | -0.3263   | 1.973339  |
| 1 | 4.283991  | 0.633914  | -1.19704  |
| 1 | 4.048738  | 1.105035  | 0.482436  |
| 1 | -0.545978 | 2.002416  | -0.831068 |
| 1 | 4.136329  | -2.64383  | 0.700833  |
| 1 | 5.188923  | -1.621914 | -0.291503 |
| 1 | 4.831651  | -1.162252 | 1.380921  |
| 1 | -0.356225 | 3.001417  | 2.065907  |
| 1 | -1.730288 | 3.24531   | 0.978206  |
| 1 | -1.333462 | 1.622552  | 1.532429  |
| 1 | 1.173749  | 4.273071  | 0.297879  |

|    |           |           |           |
|----|-----------|-----------|-----------|
| 1  | -0.365086 | 4.493183  | -0.54496  |
| 1  | 1.015919  | 3.815407  | -1.406917 |
| 6  | -1.900014 | -0.567731 | -0.29572  |
| 6  | -2.771045 | 0.023491  | -1.223499 |
| 6  | -2.414488 | -0.99029  | 0.941575  |
| 6  | -4.1217   | 0.214746  | -0.914283 |
| 1  | -2.392107 | 0.333254  | -2.194246 |
| 6  | -3.76314  | -0.809902 | 1.24743   |
| 1  | -1.764467 | -1.47896  | 1.661819  |
| 6  | -4.618871 | -0.200925 | 0.321892  |
| 1  | -4.782215 | 0.677836  | -1.64168  |
| 1  | -4.148819 | -1.145912 | 2.205857  |
| 1  | -5.668799 | -0.060821 | 0.562478  |
| 17 | 0.068324  | -2.864932 | -0.408871 |
| 6  | 1.227868  | 1.472244  | 0.304659  |
| 1  | 1.692582  | 1.856124  | 1.229316  |
| 15 | -0.135758 | -0.774794 | -0.820901 |

### R1<sub>II</sub>

E = -1117.304696      ZPVE = 0.246396      NIMAG = 0.

|    |           |           |           |
|----|-----------|-----------|-----------|
| 15 | 0.005074  | 0.249873  | 0.779851  |
| 17 | -0.036045 | 2.21376   | -0.061814 |
| 6  | -1.585101 | -0.468776 | -0.029252 |
| 6  | -1.607223 | -1.987712 | 0.243622  |
| 1  | -2.613091 | -2.373901 | 0.036581  |
| 1  | -0.911105 | -2.532286 | -0.400233 |
| 1  | -1.37478  | -2.227574 | 1.287857  |
| 6  | -1.80404  | -0.199618 | -1.52719  |

|   |           |           |           |
|---|-----------|-----------|-----------|
| 1 | -2.797359 | -0.56904  | -1.814153 |
| 1 | -1.768162 | 0.868519  | -1.756002 |
| 1 | -1.07093  | -0.708597 | -2.155532 |
| 6 | -2.733965 | 0.190524  | 0.771037  |
| 1 | -3.693602 | -0.217665 | 0.429677  |
| 1 | -2.64687  | -0.00609  | 1.844857  |
| 1 | -2.760503 | 1.274273  | 0.623618  |
| 6 | 1.597963  | -0.443785 | -0.03679  |
| 6 | 1.611457  | -0.555637 | -1.568423 |
| 1 | 2.622579  | -0.819527 | -1.905576 |
| 1 | 0.936095  | -1.336166 | -1.92898  |
| 1 | 1.338229  | 0.389721  | -2.046594 |
| 6 | 1.847854  | -1.828242 | 0.605823  |
| 1 | 2.838478  | -2.188306 | 0.301208  |
| 1 | 1.838069  | -1.77684  | 1.700236  |
| 1 | 1.118267  | -2.578466 | 0.292356  |
| 6 | 2.736141  | 0.499632  | 0.417539  |
| 1 | 2.737363  | 0.644111  | 1.503739  |
| 1 | 3.699786  | 0.055863  | 0.137886  |
| 1 | 2.665668  | 1.48164   | -0.056068 |

**R1m**

E = -1264.903251    ZPVE = 0.183825    NIMAG = 0.

|   |           |           |           |
|---|-----------|-----------|-----------|
| 6 | -1.435307 | 0.074489  | -0.252112 |
| 6 | -2.559494 | -0.046305 | -1.083687 |
| 6 | -1.454881 | -0.526841 | 1.018029  |
| 6 | -3.682702 | -0.764012 | -0.659639 |
| 1 | -2.556213 | 0.422097  | -2.064645 |

|    |           |           |           |
|----|-----------|-----------|-----------|
| 6  | -2.576986 | -1.236621 | 1.442501  |
| 1  | -0.593071 | -0.435998 | 1.672273  |
| 6  | -3.691561 | -1.358205 | 0.603239  |
| 1  | -4.545678 | -0.854226 | -1.312847 |
| 1  | -2.584905 | -1.696029 | 2.426799  |
| 1  | -4.563468 | -1.913564 | 0.936859  |
| 17 | 0.052023  | 2.659106  | 0.483335  |
| 15 | -0.014099 | 1.048723  | -0.913601 |
| 6  | 1.420442  | 0.025862  | -0.340151 |
| 6  | 1.443138  | -1.329684 | -0.717084 |
| 6  | 2.546768  | 0.568947  | 0.295128  |
| 6  | 2.559003  | -2.123689 | -0.448244 |
| 1  | 0.584301  | -1.77475  | -1.212596 |
| 6  | 3.661836  | -0.229962 | 0.565255  |
| 1  | 2.55078   | 1.611804  | 0.593768  |
| 6  | 3.672818  | -1.576373 | 0.195444  |
| 1  | 2.555039  | -3.170543 | -0.738199 |
| 1  | 4.521438  | 0.204619  | 1.067557  |
| 1  | 4.540424  | -2.194676 | 0.406288  |

### **R1<sub>IV</sub>**

E = -1073.161639      ZPVE = 0.130411      NIMAG = 0.

|    |           |           |           |
|----|-----------|-----------|-----------|
| 17 | -2.316313 | 0.944074  | 0.783211  |
| 15 | -1.330677 | -0.838458 | 0.150293  |
| 6  | -1.801574 | -0.777838 | -1.646383 |
| 1  | -2.877373 | -0.949787 | -1.739038 |
| 1  | -1.544758 | 0.170821  | -2.125351 |
| 1  | -1.273174 | -1.591348 | -2.156349 |

|   |          |           |           |
|---|----------|-----------|-----------|
| 6 | 0.423655 | -0.266575 | 0.057391  |
| 6 | 1.385391 | -1.096233 | 0.654621  |
| 6 | 0.843999 | 0.912178  | -0.581155 |
| 6 | 2.743988 | -0.767848 | 0.597484  |
| 1 | 1.071029 | -2.001311 | 1.168349  |
| 6 | 2.197184 | 1.245276  | -0.629343 |
| 1 | 0.11218  | 1.581544  | -1.024227 |
| 6 | 3.150277 | 0.402919  | -0.04412  |
| 1 | 3.477903 | -1.420622 | 1.061025  |
| 1 | 2.510473 | 2.16216   | -1.120494 |
| 1 | 4.203673 | 0.664895  | -0.083867 |

**R1v**

E = -881.418727      ZPVE = 0.076697      NIMAG = 0.

|    |           |           |           |
|----|-----------|-----------|-----------|
| 17 | 0.257024  | -1.562552 | 0         |
| 15 | -0.666418 | 0.354126  | 0         |
| 6  | 0.257024  | 1.124877  | 1.415731  |
| 1  | -0.040673 | 0.643652  | 2.350987  |
| 1  | 1.342791  | 1.051145  | 1.301561  |
| 1  | -0.030832 | 2.181681  | 1.470135  |
| 6  | 0.257024  | 1.124877  | -1.415731 |
| 1  | 1.342791  | 1.051145  | -1.301561 |
| 1  | -0.040673 | 0.643652  | -2.350987 |
| 1  | -0.030832 | 2.181681  | -1.470135 |

**Nucleophile a**

E = -2851.112773      ZPVE = 0.064954      NIMAG = 0.



|    |           |           |           |
|----|-----------|-----------|-----------|
| 6  | -2.642586 | 0.612788  | 0.000154  |
| 1  | -2.856774 | 1.245181  | -0.873056 |
| 1  | -2.856718 | 1.244993  | 0.873514  |
| 6  | -3.581909 | -0.610838 | 0.000052  |
| 1  | -3.432404 | -1.245463 | 0.881453  |
| 1  | -4.639538 | -0.312239 | 0.000117  |
| 1  | -3.432459 | -1.245275 | -0.881493 |
| 12 | -0.577227 | 0.243663  | 0.000048  |
| 35 | 1.756902  | -0.074938 | -0.000067 |

**Nucleophile b**

E = -3118.095888    ZPVE = 0.123724    NIMAG = 0.

|    |           |           |           |
|----|-----------|-----------|-----------|
| 12 | 0.786393  | -0.416458 | -0.000001 |
| 35 | 3.134896  | -0.266011 | 0.000039  |
| 6  | -1.24189  | -0.917329 | -0.000053 |
| 6  | -1.64387  | 0.422494  | -0.000001 |
| 6  | -2.275054 | -1.859943 | -0.000109 |
| 6  | -2.959663 | 0.871689  | -0.000001 |
| 6  | -3.623428 | -1.467246 | -0.000113 |
| 1  | -2.04137  | -2.922511 | -0.000152 |
| 6  | -3.960084 | -0.112436 | -0.000059 |
| 1  | -3.224129 | 1.923977  | 0.000041  |
| 1  | -4.409161 | -2.2176   | -0.000158 |
| 1  | -5.002948 | 0.191332  | -0.000062 |
| 8  | -0.508691 | 1.286191  | 0.000057  |
| 6  | -0.678544 | 2.705792  | 0.000058  |
| 1  | -1.219568 | 3.024799  | 0.896944  |

|   |           |          |          |
|---|-----------|----------|----------|
| 1 | 0.323383  | 3.135428 | 0.000073 |
| 1 | -1.219545 | 3.024803 | -0.89684 |

MgClBr

E = -3232.161622    ZPVE = 0.002541    NIMAG = 0.

|    |   |   |           |
|----|---|---|-----------|
| 17 | 0 | 0 | -2.884437 |
| 12 | 0 | 0 | -0.689014 |
| 35 | 0 | 0 | 1.637246  |

**R11 + a S<sub>N</sub>2@P-b pathway**

**RC<sub>1a-i</sub>**

E = -4276.931440    ZPVE = 0.431783    NIMAG = 0.

|   |           |           |           |
|---|-----------|-----------|-----------|
| 6 | 0.216286  | -1.795286 | 0.258675  |
| 6 | -1.477242 | -0.96584  | 1.971127  |
| 6 | 1.019958  | -0.903811 | 2.550722  |
| 6 | 1.249247  | -1.907781 | 1.408026  |
| 6 | -0.416315 | -1.037796 | 3.078846  |
| 6 | -2.35593  | -2.040968 | -0.234128 |
| 6 | 2.06052   | -1.078812 | 3.663017  |
| 6 | -2.199683 | -3.27515  | -1.140531 |
| 6 | -3.760322 | -2.058888 | 0.395725  |
| 1 | 0.427584  | -2.588982 | -0.466628 |
| 1 | -2.459955 | -1.14773  | 2.413075  |
| 1 | -1.533659 | 0.053269  | 1.562131  |
| 1 | 1.138936  | 0.115034  | 2.146126  |
| 1 | 2.270013  | -1.820556 | 1.024313  |

|    |           |           |           |
|----|-----------|-----------|-----------|
| 1  | 1.159687  | -2.925666 | 1.815135  |
| 1  | -0.612463 | -0.266068 | 3.833853  |
| 1  | -0.50667  | -2.005212 | 3.595946  |
| 1  | -2.307791 | -1.142925 | -0.859398 |
| 1  | 3.078874  | -0.939896 | 3.283309  |
| 1  | 1.900981  | -0.35557  | 4.470208  |
| 1  | 1.999374  | -2.083895 | 4.098756  |
| 1  | -2.29842  | -4.199648 | -0.556244 |
| 1  | -2.979817 | -3.284375 | -1.90872  |
| 1  | -1.238792 | -3.306802 | -1.661389 |
| 1  | -3.857624 | -2.862964 | 1.137576  |
| 1  | -4.511468 | -2.236107 | -0.381162 |
| 1  | -4.011368 | -1.109606 | 0.874631  |
| 6  | 2.302668  | -0.110548 | -0.944461 |
| 6  | 2.995865  | 0.962553  | -0.364058 |
| 6  | 3.017948  | -1.083983 | -1.662875 |
| 6  | 4.386746  | 1.0504    | -0.482927 |
| 1  | 2.456606  | 1.734075  | 0.176496  |
| 6  | 4.403285  | -0.98878  | -1.785309 |
| 1  | 2.493061  | -1.906775 | -2.138578 |
| 6  | 5.090722  | 0.077398  | -1.193183 |
| 1  | 4.911894  | 1.886249  | -0.030582 |
| 1  | 4.946977  | -1.743345 | -2.346137 |
| 1  | 6.169652  | 0.150269  | -1.293269 |
| 17 | -0.137482 | -0.691863 | -2.656352 |
| 6  | -1.225349 | -1.976077 | 0.831336  |
| 1  | -1.198616 | -2.972265 | 1.306109  |
| 6  | 0.517128  | 3.75085   | 0.530827  |
| 1  | 1.352963  | 3.818449  | -0.183183 |
| 1  | -0.06014  | 4.674332  | 0.367792  |

|    |           |           |           |
|----|-----------|-----------|-----------|
| 6  | 1.07092   | 3.76361   | 1.971319  |
| 1  | 1.714297  | 4.633065  | 2.173291  |
| 1  | 0.265111  | 3.789434  | 2.715629  |
| 1  | 1.671873  | 2.871288  | 2.196432  |
| 15 | 0.480288  | -0.182951 | -0.712933 |
| 12 | -0.783494 | 2.198668  | -0.080549 |
| 35 | -3.063572 | 1.743094  | -0.675995 |

**TS<sub>1a-i</sub>**

E = -4276.891567      ZPVE = 0.429453      NIMAG = 1.

|   |           |          |           |
|---|-----------|----------|-----------|
| 6 | -0.615291 | 1.923192 | -0.308242 |
| 6 | 1.769558  | 2.192843 | 0.565356  |
| 6 | -0.185817 | 2.373973 | 2.201738  |
| 6 | -1.118966 | 2.602616 | 1.001763  |
| 6 | 1.230089  | 2.848862 | 1.843535  |
| 6 | 1.386203  | 1.740872 | -1.961496 |
| 6 | -0.726587 | 3.057773 | 3.462203  |
| 6 | 0.497895  | 2.060223 | -3.17768  |
| 6 | 2.83282   | 2.17572  | -2.253327 |
| 1 | -1.276548 | 2.241183 | -1.122047 |
| 1 | 2.747115  | 2.625983 | 0.336045  |
| 1 | 1.959192  | 1.127345 | 0.743087  |
| 1 | -0.137311 | 1.289896 | 2.399486  |
| 1 | -2.136646 | 2.275912 | 1.241423  |
| 1 | -1.176863 | 3.682654 | 0.79945   |
| 1 | 1.91378   | 2.64442  | 2.676443  |
| 1 | 1.207461  | 3.942916 | 1.719293  |
| 1 | 1.407192  | 0.648514 | -1.835725 |

|    |           |           |           |
|----|-----------|-----------|-----------|
| 1  | -1.722917 | 2.68518   | 3.726779  |
| 1  | -0.065105 | 2.882748  | 4.317518  |
| 1  | -0.802419 | 4.142871  | 3.317416  |
| 1  | 0.424497  | 3.144353  | -3.336533 |
| 1  | 0.924893  | 1.618581  | -4.083301 |
| 1  | -0.518193 | 1.66226   | -3.08723  |
| 1  | 2.918741  | 3.270119  | -2.289827 |
| 1  | 3.151921  | 1.785496  | -3.225145 |
| 1  | 3.533866  | 1.795999  | -1.506981 |
| 6  | -2.559045 | -0.223505 | -0.23889  |
| 6  | -3.000487 | -1.531021 | 0.094304  |
| 6  | -3.532439 | 0.734481  | -0.620274 |
| 6  | -4.351885 | -1.857262 | 0.059592  |
| 1  | -2.275016 | -2.284785 | 0.375919  |
| 6  | -4.880157 | 0.398886  | -0.659882 |
| 1  | -3.236577 | 1.738398  | -0.900911 |
| 6  | -5.294582 | -0.895202 | -0.316483 |
| 1  | -4.669608 | -2.861806 | 0.320138  |
| 1  | -5.611715 | 1.142102  | -0.961776 |
| 1  | -6.34933  | -1.15176  | -0.348565 |
| 17 | -0.165853 | -2.270365 | -2.108188 |
| 6  | 0.836775  | 2.373769  | -0.650883 |
| 1  | 0.750897  | 3.458624  | -0.835999 |
| 6  | -0.087454 | -2.902817 | 1.831692  |
| 1  | -0.796708 | -2.213218 | 2.296688  |
| 1  | -0.639197 | -3.750272 | 1.399141  |
| 6  | 1.020648  | -3.329844 | 2.787215  |
| 1  | 0.611049  | -3.822508 | 3.686349  |
| 1  | 1.718852  | -4.038886 | 2.328438  |
| 1  | 1.614787  | -2.476852 | 3.131995  |

|    |           |           |           |
|----|-----------|-----------|-----------|
| 15 | -0.789449 | 0.062675  | -0.201095 |
| 12 | 0.884175  | -2.089928 | -0.006655 |
| 35 | 3.178668  | -1.340903 | 0.162642  |

**PC<sub>1a-i</sub>**

E = -4277.010399    ZPVE = 0.434871    NIMAG = 0.

|   |           |           |           |
|---|-----------|-----------|-----------|
| 6 | 0.153962  | 1.612257  | 0.716185  |
| 6 | -2.380503 | 1.37698   | 1.012341  |
| 6 | -1.48969  | 3.146594  | -0.593225 |
| 6 | -0.11543  | 2.996939  | 0.081359  |
| 6 | -2.596289 | 2.767629  | 0.400878  |
| 6 | -0.819984 | -0.089537 | 2.474302  |
| 6 | -1.678961 | 4.561638  | -1.153981 |
| 6 | 0.552286  | -0.192387 | 3.162343  |
| 6 | -1.93018  | -0.312896 | 3.517735  |
| 1 | 1.060468  | 1.715565  | 1.319381  |
| 1 | -3.174553 | 1.189356  | 1.740482  |
| 1 | -2.493549 | 0.606226  | 0.240458  |
| 1 | -1.548405 | 2.440649  | -1.432958 |
| 1 | 0.682192  | 3.268858  | -0.620023 |
| 1 | -0.054666 | 3.735773  | 0.894956  |
| 1 | -3.572794 | 2.804163  | -0.097671 |
| 1 | -2.626635 | 3.5215    | 1.202809  |
| 1 | -0.910407 | -0.923285 | 1.756461  |
| 1 | -0.905945 | 4.81105   | -1.890479 |
| 1 | -2.652979 | 4.662918  | -1.645043 |
| 1 | -1.630502 | 5.310264  | -0.353394 |
| 1 | 0.690358  | 0.637719  | 3.866754  |

|    |           |           |           |
|----|-----------|-----------|-----------|
| 1  | 0.624438  | -1.12452  | 3.731434  |
| 1  | 1.392165  | -0.178336 | 2.462317  |
| 1  | -1.97824  | 0.529858  | 4.218994  |
| 1  | -1.72402  | -1.217031 | 4.099479  |
| 1  | -2.914519 | -0.436099 | 3.061129  |
| 6  | 2.553122  | 0.274948  | -0.269509 |
| 6  | 3.249054  | -0.917102 | -0.017817 |
| 6  | 3.279271  | 1.477356  | -0.365078 |
| 6  | 4.639489  | -0.904959 | 0.14058   |
| 1  | 2.716488  | -1.860343 | 0.057266  |
| 6  | 4.665398  | 1.485349  | -0.208193 |
| 1  | 2.769807  | 2.415611  | -0.56375  |
| 6  | 5.349679  | 0.291899  | 0.046547  |
| 1  | 5.160149  | -1.837493 | 0.336936  |
| 1  | 5.210269  | 2.421875  | -0.285711 |
| 1  | 6.428734  | 0.298819  | 0.169692  |
| 17 | 0.997343  | -3.833671 | 0.034565  |
| 6  | -1.005517 | 1.242565  | 1.695447  |
| 1  | -0.955003 | 2.034588  | 2.463303  |
| 6  | 0.568484  | 0.832459  | -2.286657 |
| 1  | 0.530155  | 1.924812  | -2.313795 |
| 1  | 1.520188  | 0.543616  | -2.74429  |
| 6  | -0.59156  | 0.221385  | -3.083731 |
| 1  | -0.573619 | 0.608176  | -4.108663 |
| 1  | -0.515408 | -0.86893  | -3.142468 |
| 1  | -1.569178 | 0.450205  | -2.652797 |
| 15 | 0.71866   | 0.242038  | -0.505511 |
| 12 | -0.428665 | -2.12798  | -0.301639 |
| 35 | -2.742615 | -1.989562 | -0.879235 |

**P<sub>1a-i</sub>**

E = -1044.805304      ZPVE = 0.430489      NIMAG = 0.

|   |           |           |           |
|---|-----------|-----------|-----------|
| 6 | -0.527808 | 0.181855  | -0.564428 |
| 6 | -2.976914 | 0.050756  | 0.140007  |
| 6 | -1.836123 | -2.069127 | -0.720518 |
| 6 | -0.707348 | -1.179409 | -1.274603 |
| 6 | -3.14515  | -1.271975 | -0.62216  |
| 6 | -1.814351 | 2.367703  | 0.121595  |
| 6 | -2.004987 | -3.337898 | -1.566815 |
| 6 | -0.796429 | 3.256343  | -0.615681 |
| 6 | -3.182662 | 3.075671  | 0.122866  |
| 1 | 0.130461  | 0.775627  | -1.208192 |
| 1 | -3.937953 | 0.5733    | 0.147598  |
| 1 | -2.726959 | -0.147146 | 1.192167  |
| 1 | -1.569317 | -2.382747 | 0.296255  |
| 1 | 0.23952   | -1.732994 | -1.279945 |
| 1 | -0.934642 | -0.972628 | -2.332891 |
| 1 | -3.919872 | -1.886975 | -0.145389 |
| 1 | -3.506694 | -1.051983 | -1.638627 |
| 1 | -1.483534 | 2.273511  | 1.164416  |
| 1 | -1.07723  | -3.920935 | -1.604862 |
| 1 | -2.790337 | -3.98514  | -1.159478 |
| 1 | -2.282208 | -3.08685  | -2.598437 |
| 1 | -1.051067 | 3.34233   | -1.680449 |
| 1 | -0.794076 | 4.267577  | -0.194047 |
| 1 | 0.225733  | 2.875509  | -0.546616 |
| 1 | -3.611139 | 3.112313  | -0.887644 |
| 1 | -3.073667 | 4.108718  | 0.471194  |



|    |           |           |           |
|----|-----------|-----------|-----------|
| 1  | -3.910012 | 2.589378  | 0.778624  |
| 6  | 2.209709  | 0.123497  | 0.293387  |
| 6  | 2.909093  | 1.333496  | 0.136184  |
| 6  | 2.844809  | -1.060219 | -0.121899 |
| 6  | 4.183765  | 1.366518  | -0.435576 |
| 1  | 2.453585  | 2.259373  | 0.478147  |
| 6  | 4.123911  | -1.033181 | -0.685109 |
| 1  | 2.34776   | -2.018263 | -0.005956 |
| 6  | 4.796142  | 0.180821  | -0.848906 |
| 1  | 4.70119   | 2.315587  | -0.545781 |
| 1  | 4.593624  | -1.962069 | -0.99758  |
| 1  | 5.790085  | 0.200921  | -1.286691 |
| 6  | -1.889852 | 0.941238  | -0.491651 |
| 1  | -2.186469 | 1.08389   | -1.546818 |
| 6  | 0.436433  | -1.47948  | 1.878692  |
| 1  | 0.376636  | -2.300008 | 1.155709  |
| 1  | 1.411119  | -1.571965 | 2.372553  |
| 6  | -0.66686  | -1.610467 | 2.938089  |
| 1  | -0.583434 | -2.56942  | 3.46223   |
| 1  | -0.593134 | -0.811918 | 3.68355   |
| 1  | -1.669171 | -1.562911 | 2.501751  |
| 15 | 0.513263  | 0.211272  | 1.056958  |

**R1<sub>II</sub> + a S<sub>N</sub>2@P-b pathway**

**RC<sub>IIa-i</sub>**

E = -3968.437426      ZPVE = 0.312509      NIMAG = 0.

|    |             |              |              |
|----|-------------|--------------|--------------|
| 15 | 1.007718000 | -0.112117000 | -0.502983000 |
| 17 | 0.903218000 | 0.033368000  | -2.592425000 |
| 6  | 2.570061000 | -1.190992000 | -0.288438000 |

|    |              |              |              |
|----|--------------|--------------|--------------|
| 6  | 2.126866000  | -2.606468000 | -0.731213000 |
| 1  | 2.969527000  | -3.296854000 | -0.605489000 |
| 1  | 1.300585000  | -2.986421000 | -0.121762000 |
| 1  | 1.829368000  | -2.633253000 | -1.783390000 |
| 6  | 2.928593000  | -1.225469000 | 1.212579000  |
| 1  | 3.679242000  | -2.007965000 | 1.375430000  |
| 1  | 3.363880000  | -0.281987000 | 1.552847000  |
| 1  | 2.067188000  | -1.465063000 | 1.844660000  |
| 6  | 3.792831000  | -0.764694000 | -1.118557000 |
| 1  | 4.585377000  | -1.510316000 | -0.979940000 |
| 1  | 3.564796000  | -0.717738000 | -2.186205000 |
| 1  | 4.193538000  | 0.201946000  | -0.808771000 |
| 6  | -0.736379000 | -1.836421000 | 3.563709000  |
| 1  | -0.564169000 | -2.568140000 | 4.367286000  |
| 1  | -1.622621000 | -1.256963000 | 3.851894000  |
| 1  | 0.114484000  | -1.141370000 | 3.589188000  |
| 6  | -0.908877000 | -2.498547000 | 2.179171000  |
| 1  | -1.751472000 | -3.205419000 | 2.226891000  |
| 1  | -0.028856000 | -3.127023000 | 1.970162000  |
| 12 | -1.284965000 | -1.225057000 | 0.528577000  |
| 35 | -2.942441000 | -0.253032000 | -0.906614000 |
| 6  | 1.218677000  | 1.708103000  | 0.032400000  |
| 6  | 2.533655000  | 2.368462000  | -0.409352000 |
| 1  | 2.485837000  | 3.440620000  | -0.182283000 |
| 1  | 3.399481000  | 1.961883000  | 0.120235000  |
| 1  | 2.699416000  | 2.265769000  | -1.485668000 |
| 6  | 1.091105000  | 1.744819000  | 1.573227000  |
| 1  | 1.109404000  | 2.792095000  | 1.896803000  |
| 1  | 0.144991000  | 1.318265000  | 1.924158000  |
| 1  | 1.908062000  | 1.230237000  | 2.083706000  |

|   |              |             |              |
|---|--------------|-------------|--------------|
| 6 | 0.021808000  | 2.478051000 | -0.574495000 |
| 1 | -0.936599000 | 1.985896000 | -0.381101000 |
| 1 | -0.012152000 | 3.477452000 | -0.125021000 |
| 1 | 0.122277000  | 2.595800000 | -1.655790000 |

**TS<sub>IIa-i</sub>**

E = -3968.383025      ZPVE = 0.310230      NIMAG = 1.

|    |           |           |           |
|----|-----------|-----------|-----------|
| 15 | 1.031667  | 0.083297  | 0.044743  |
| 17 | -0.221052 | -0.90394  | -2.457152 |
| 6  | 2.620892  | -0.946047 | 0.031729  |
| 6  | 2.274741  | -2.366936 | -0.465975 |
| 1  | 3.186328  | -2.975651 | -0.42967  |
| 1  | 1.525615  | -2.851653 | 0.164893  |
| 1  | 1.903355  | -2.360424 | -1.492007 |
| 6  | 3.156547  | -1.054325 | 1.483644  |
| 1  | 4.005461  | -1.74961  | 1.480153  |
| 1  | 3.509626  | -0.103222 | 1.882821  |
| 1  | 2.404473  | -1.463853 | 2.166316  |
| 6  | 3.685869  | -0.341441 | -0.910202 |
| 1  | 4.560828  | -1.003273 | -0.911877 |
| 1  | 3.317322  | -0.277656 | -1.938245 |
| 1  | 4.024375  | 0.648154  | -0.597796 |
| 6  | -1.856388 | -1.856818 | 2.58647   |
| 1  | -2.139467 | -2.691912 | 3.250052  |
| 1  | -2.766792 | -1.283241 | 2.383693  |
| 1  | -1.184668 | -1.209436 | 3.161433  |
| 6  | -1.197438 | -2.359809 | 1.312771  |
| 1  | -1.831953 | -3.066949 | 0.752232  |

|    |           |           |           |
|----|-----------|-----------|-----------|
| 1  | -0.223403 | -2.824089 | 1.472192  |
| 12 | -1.377116 | -0.872815 | -0.365407 |
| 35 | -3.234694 | 0.654313  | -0.153236 |
| 6  | 1.370491  | 1.912178  | 0.412437  |
| 6  | 1.5156    | 2.579516  | -0.986069 |
| 1  | 1.54127   | 3.667026  | -0.840636 |
| 1  | 2.438671  | 2.285398  | -1.492976 |
| 1  | 0.672897  | 2.351511  | -1.645092 |
| 6  | 2.567229  | 2.287619  | 1.303963  |
| 1  | 2.581106  | 3.379031  | 1.41518   |
| 1  | 2.477404  | 1.861949  | 2.307684  |
| 1  | 3.530672  | 1.993244  | 0.88307   |
| 6  | 0.069929  | 2.422661  | 1.081881  |
| 1  | -0.054221 | 2.006917  | 2.087652  |
| 1  | 0.128694  | 3.513726  | 1.178509  |
| 1  | -0.829868 | 2.184774  | 0.507117  |

**PCIIa-i**

E = -3968.519922      ZPVE = 0.316043      NIMAG = 0.

|    |           |           |           |
|----|-----------|-----------|-----------|
| 15 | -0.929995 | -0.234159 | 0.284675  |
| 17 | 1.030953  | 3.255471  | -0.516317 |
| 6  | -2.488135 | 0.867912  | 0.129908  |
| 6  | -2.241159 | 2.082792  | 1.056848  |
| 1  | -3.106995 | 2.753062  | 0.993213  |
| 1  | -2.137437 | 1.794864  | 2.10845   |
| 1  | -1.358078 | 2.65505   | 0.760926  |
| 6  | -3.797028 | 0.176153  | 0.562934  |
| 1  | -4.608272 | 0.914003  | 0.535222  |

|    |           |           |           |
|----|-----------|-----------|-----------|
| 1  | -4.081022 | -0.645331 | -0.095956 |
| 1  | -3.748166 | -0.207817 | 1.586509  |
| 6  | -2.620028 | 1.382088  | -1.318171 |
| 1  | -3.438028 | 2.111129  | -1.363538 |
| 1  | -1.712188 | 1.892671  | -1.654665 |
| 1  | -2.859498 | 0.581916  | -2.024203 |
| 6  | 0.277402  | -1.054027 | 2.759245  |
| 1  | 0.111902  | -1.455294 | 3.765217  |
| 1  | 0.749007  | -0.071952 | 2.873284  |
| 1  | 0.993125  | -1.701434 | 2.248378  |
| 6  | -1.061363 | -0.947839 | 2.012242  |
| 1  | -1.734155 | -0.292956 | 2.572891  |
| 1  | -1.55594  | -1.923559 | 1.959525  |
| 12 | 1.320105  | 1.062571  | -0.117008 |
| 35 | 3.153152  | -0.469986 | 0.005217  |
| 6  | -0.94305  | -1.737163 | -0.908964 |
| 6  | -0.381045 | -1.265932 | -2.269384 |
| 1  | -0.377172 | -2.108348 | -2.971588 |
| 1  | -0.973815 | -0.465638 | -2.720141 |
| 1  | 0.65677   | -0.925568 | -2.177297 |
| 6  | -2.326348 | -2.381745 | -1.109386 |
| 1  | -2.2078   | -3.290691 | -1.712108 |
| 1  | -2.787758 | -2.678078 | -0.161896 |
| 1  | -3.019579 | -1.726819 | -1.643042 |
| 6  | 0.019947  | -2.801948 | -0.334963 |
| 1  | -0.363245 | -3.255989 | 0.583668  |
| 1  | 0.126628  | -3.605358 | -1.073917 |
| 1  | 1.018737  | -2.401584 | -0.142003 |

**P11a-i**

E = -736.311758      ZPVE = 0.311601      NIMAG = 0.

|    |           |           |           |
|----|-----------|-----------|-----------|
| 15 | -0.011095 | 0.350312  | -0.678037 |
| 6  | -1.303284 | -0.911162 | 0.019635  |
| 6  | -1.7013   | -0.70631  | 1.493512  |
| 1  | -2.449445 | -1.458173 | 1.779823  |
| 1  | -0.852197 | -0.813636 | 2.173524  |
| 1  | -2.150595 | 0.275781  | 1.668031  |
| 6  | -0.813876 | -2.360204 | -0.175187 |
| 1  | -1.641599 | -3.051324 | 0.032267  |
| 1  | -0.48349  | -2.544155 | -1.203102 |
| 1  | 0.00326   | -2.621861 | 0.502052  |
| 6  | -2.557803 | -0.735482 | -0.871056 |
| 1  | -3.337597 | -1.439588 | -0.55059  |
| 1  | -2.979334 | 0.271129  | -0.811692 |
| 1  | -2.329269 | -0.938177 | -1.922199 |
| 6  | -1.687625 | 2.646712  | -0.106338 |
| 1  | -2.581703 | 2.11164   | 0.225577  |
| 1  | -1.758394 | 2.773929  | -1.192017 |
| 1  | -1.7198   | 3.642873  | 0.350135  |
| 6  | -0.389791 | 1.924593  | 0.288759  |
| 1  | 0.445283  | 2.594363  | 0.064676  |
| 1  | -0.368939 | 1.75145   | 1.37146   |
| 6  | 1.749595  | -0.070484 | 0.002464  |
| 6  | 2.324733  | -1.233266 | -0.837414 |
| 1  | 3.374565  | -1.400048 | -0.561859 |
| 1  | 1.793482  | -2.173632 | -0.680185 |
| 1  | 2.291653  | -1.002205 | -1.907469 |
| 6  | 1.844966  | -0.411837 | 1.500658  |

|   |          |           |           |
|---|----------|-----------|-----------|
| 1 | 2.898366 | -0.541893 | 1.785201  |
| 1 | 1.43437  | 0.384     | 2.130861  |
| 1 | 1.326917 | -1.342461 | 1.747633  |
| 6 | 2.636529 | 1.166127  | -0.279122 |
| 1 | 2.426482 | 1.996049  | 0.401326  |
| 1 | 3.690444 | 0.893212  | -0.140245 |
| 1 | 2.521091 | 1.525916  | -1.308123 |

**R1<sub>III</sub> + a S<sub>N</sub>2@P-b pathway**

**RC<sub>IIIa-i</sub>**

E = -4116.035688      ZPVE = 0.250003      NIMAG = 0.

|    |           |           |           |
|----|-----------|-----------|-----------|
| 6  | -0.181422 | 1.910258  | 0.169016  |
| 6  | 1.058108  | 2.401673  | -0.270925 |
| 6  | -1.261406 | 2.792712  | 0.353767  |
| 6  | 1.208345  | 3.766635  | -0.53579  |
| 1  | 1.89755   | 1.725229  | -0.404052 |
| 6  | -1.100659 | 4.151054  | 0.092649  |
| 1  | -2.218859 | 2.418026  | 0.702516  |
| 6  | 0.133991  | 4.638568  | -0.355196 |
| 1  | 2.167059  | 4.142048  | -0.880265 |
| 1  | -1.934958 | 4.830976  | 0.237618  |
| 1  | 0.254714  | 5.698578  | -0.559158 |
| 17 | -0.591356 | 0.070115  | 2.612567  |
| 6  | 0.788595  | -3.676173 | 0.59151   |
| 1  | 1.613345  | -4.341493 | 0.888121  |
| 1  | 0.175664  | -3.560652 | 1.498552  |
| 6  | -0.050866 | -4.363772 | -0.507001 |
| 1  | -0.446874 | -5.339291 | -0.186413 |
| 1  | -0.915956 | -3.757077 | -0.804294 |

|    |           |           |           |
|----|-----------|-----------|-----------|
| 1  | 0.535576  | -4.546975 | -1.416393 |
| 15 | -0.323313 | 0.123152  | 0.520046  |
| 12 | 1.632885  | -1.798354 | 0.126649  |
| 35 | 3.525445  | -0.47853  | -0.557614 |
| 6  | -1.987318 | -0.326647 | -0.121805 |
| 6  | -2.286797 | 0.024491  | -1.450819 |
| 6  | -2.891417 | -1.119097 | 0.599552  |
| 6  | -3.480354 | -0.398253 | -2.037455 |
| 1  | -1.598304 | 0.635678  | -2.027671 |
| 6  | -4.08734  | -1.533864 | 0.007974  |
| 1  | -2.672513 | -1.40393  | 1.622821  |
| 6  | -4.38436  | -1.176657 | -1.308975 |
| 1  | -3.70369  | -0.114769 | -3.061629 |
| 1  | -4.784142 | -2.139405 | 0.579738  |
| 1  | -5.31365  | -1.502963 | -1.766141 |

**TSIIIa-i**

E = -4116.000107    ZPVE = 0.248280    NIMAG = 1.

|   |           |           |           |
|---|-----------|-----------|-----------|
| 6 | -0.635272 | -1.858503 | 0.000185  |
| 6 | 0.583673  | -2.522102 | 0.305025  |
| 6 | -1.786549 | -2.635169 | -0.290425 |
| 6 | 0.621256  | -3.910874 | 0.390473  |
| 1 | 1.490581  | -1.940368 | 0.458229  |
| 6 | -1.729436 | -4.020947 | -0.221921 |
| 1 | -2.709494 | -2.149017 | -0.585981 |
| 6 | -0.530804 | -4.659962 | 0.130514  |
| 1 | 1.553096  | -4.407798 | 0.640506  |
| 1 | -2.611439 | -4.610592 | -0.45266  |



|    |           |           |           |
|----|-----------|-----------|-----------|
| 1  | -0.494888 | -5.74416  | 0.18483   |
| 17 | 0.567933  | 1.516189  | -2.446862 |
| 6  | 1.140883  | 2.980914  | 1.157288  |
| 1  | 1.696101  | 3.833049  | 0.734373  |
| 1  | 0.069521  | 3.195529  | 1.075387  |
| 6  | 1.586118  | 2.654685  | 2.577067  |
| 1  | 1.498445  | 3.524453  | 3.250719  |
| 1  | 0.984034  | 1.851723  | 3.018409  |
| 1  | 2.631325  | 2.327222  | 2.615655  |
| 15 | -0.517373 | -0.079343 | -0.125712 |
| 12 | 1.694215  | 1.481522  | -0.349753 |
| 35 | 3.500808  | -0.084499 | 0.111261  |
| 6  | -2.204305 | 0.552438  | 0.011222  |
| 6  | -3.135267 | 0.007334  | 0.927661  |
| 6  | -2.554247 | 1.721431  | -0.703307 |
| 6  | -4.376968 | 0.610789  | 1.112695  |
| 1  | -2.874724 | -0.864729 | 1.517764  |
| 6  | -3.808122 | 2.301796  | -0.52778  |
| 1  | -1.847437 | 2.148526  | -1.407402 |
| 6  | -4.720457 | 1.751023  | 0.378526  |
| 1  | -5.076055 | 0.19242   | 1.830532  |
| 1  | -4.072192 | 3.187474  | -1.097325 |
| 1  | -5.693046 | 2.213288  | 0.518861  |

**PCIIIa-i**

E = -4116.120878    ZPVE = 0.253275    NIMAG = 0.

|   |           |          |           |
|---|-----------|----------|-----------|
| 6 | 0.360963  | 1.671789 | -0.309372 |
| 6 | -0.896203 | 2.175849 | -0.688845 |

|    |           |           |           |
|----|-----------|-----------|-----------|
| 6  | 1.516578  | 2.404257  | -0.625801 |
| 6  | -0.988993 | 3.396727  | -1.361539 |
| 1  | -1.805148 | 1.62244   | -0.466733 |
| 6  | 1.415544  | 3.625453  | -1.295763 |
| 1  | 2.496317  | 2.020281  | -0.361219 |
| 6  | 0.163462  | 4.12622   | -1.662363 |
| 1  | -1.965396 | 3.773491  | -1.651337 |
| 1  | 2.317317  | 4.181038  | -1.536479 |
| 1  | 0.087795  | 5.073334  | -2.188328 |
| 17 | -0.689532 | -3.246544 | -1.590187 |
| 6  | 0.247918  | 0.486674  | 2.388453  |
| 1  | 0.391968  | -0.454923 | 2.932028  |
| 1  | 1.071049  | 1.152477  | 2.667168  |
| 6  | -1.093723 | 1.126403  | 2.770031  |
| 1  | -1.134836 | 1.26666   | 3.855044  |
| 1  | -1.213252 | 2.10837   | 2.302905  |
| 1  | -1.943327 | 0.508183  | 2.46937   |
| 15 | 0.422921  | 0.054981  | 0.579464  |
| 12 | -1.466918 | -1.515519 | -0.398127 |
| 35 | -3.547846 | -0.5621   | 0.306339  |
| 6  | 2.153307  | -0.548497 | 0.412068  |
| 6  | 3.195701  | -0.12205  | 1.254143  |
| 6  | 2.441278  | -1.468671 | -0.610399 |
| 6  | 4.495712  | -0.597707 | 1.070104  |
| 1  | 3.007807  | 0.583563  | 2.056527  |
| 6  | 3.744448  | -1.935987 | -0.796277 |
| 1  | 1.649136  | -1.841111 | -1.252788 |
| 6  | 4.773265  | -1.504434 | 0.043403  |
| 1  | 5.28931   | -0.259843 | 1.73024   |
| 1  | 3.947055  | -2.649096 | -1.589558 |

|   |         |           |           |
|---|---------|-----------|-----------|
| 1 | 5.78452 | -1.874757 | -0.097022 |
|---|---------|-----------|-----------|

**P<sub>IIIa-i</sub>**

E = -883.919984      ZPVE = 0.248631      NIMAG = 0.

|    |           |           |           |
|----|-----------|-----------|-----------|
| 6  | -1.330334 | -0.149017 | 0.240533  |
| 6  | -2.491655 | -0.309155 | 1.012948  |
| 6  | -1.210047 | -0.886128 | -0.950046 |
| 6  | -3.51401  | -1.171401 | 0.602415  |
| 1  | -2.593312 | 0.241693  | 1.944596  |
| 6  | -2.226517 | -1.751018 | -1.359692 |
| 1  | -0.312357 | -0.79309  | -1.555207 |
| 6  | -3.382882 | -1.894123 | -0.585007 |
| 1  | -4.405811 | -1.281569 | 1.213149  |
| 1  | -2.115806 | -2.31568  | -2.281491 |
| 1  | -4.172358 | -2.568859 | -0.903743 |
| 6  | -0.2032   | 2.403669  | -0.450375 |
| 1  | 0.657283  | 3.070304  | -0.31668  |
| 1  | -0.140969 | 1.981621  | -1.460847 |
| 6  | -1.502874 | 3.204105  | -0.288585 |
| 1  | -1.550017 | 4.011985  | -1.027007 |
| 1  | -2.383924 | 2.570641  | -0.43281  |
| 1  | -1.572601 | 3.654999  | 0.707149  |
| 15 | -0.043417 | 1.052035  | 0.841666  |
| 6  | 1.52135   | 0.194425  | 0.33618   |
| 6  | 2.394565  | 0.654326  | -0.662454 |
| 6  | 1.892895  | -0.951663 | 1.064662  |
| 6  | 3.594414  | -0.014777 | -0.931298 |
| 1  | 2.150274  | 1.537241  | -1.243762 |

|   |          |           |           |
|---|----------|-----------|-----------|
| 6 | 3.081375 | -1.627175 | 0.789277  |
| 1 | 1.242342 | -1.319322 | 1.854691  |
| 6 | 3.94045  | -1.158568 | -0.210845 |
| 1 | 4.254643 | 0.360471  | -1.708588 |
| 1 | 3.341948 | -2.513795 | 1.360646  |
| 1 | 4.870751 | -1.678156 | -0.421367 |

**R1<sub>IV</sub> + a S<sub>N</sub>2@P-b pathway**

**RC<sub>IVa-i</sub>**

E = -3924.291525      ZPVE = 0.196575      NIMAG = 0.

|    |              |              |              |
|----|--------------|--------------|--------------|
| 17 | -0.841690000 | 1.068443000  | 1.305630000  |
| 6  | -0.260255000 | -3.246936000 | -0.835032000 |
| 1  | -0.883313000 | -2.426481000 | -1.225442000 |
| 1  | -0.951466000 | -4.095840000 | -0.725040000 |
| 6  | 0.819557000  | -3.607970000 | -1.878426000 |
| 1  | 1.418528000  | -4.471234000 | -1.562468000 |
| 1  | 0.390953000  | -3.863770000 | -2.859158000 |
| 1  | 1.524214000  | -2.783089000 | -2.049386000 |
| 15 | 0.967601000  | -0.016077000 | 1.335474000  |
| 12 | 0.395098000  | -2.694989000 | 1.093480000  |
| 35 | 0.913107000  | -3.211536000 | 3.384816000  |
| 6  | 1.652271000  | 0.498791000  | 2.959529000  |
| 1  | 1.750264000  | 1.583661000  | 3.044240000  |
| 1  | 0.976895000  | 0.129440000  | 3.733951000  |
| 1  | 2.622121000  | 0.012822000  | 3.104241000  |
| 6  | 1.987391000  | 0.829760000  | 0.073774000  |
| 6  | 1.672221000  | 0.596884000  | -1.277501000 |
| 6  | 3.082933000  | 1.648791000  | 0.390951000  |
| 6  | 2.431724000  | 1.182142000  | -2.289725000 |

|   |             |              |              |
|---|-------------|--------------|--------------|
| 1 | 0.834019000 | -0.043625000 | -1.538665000 |
| 6 | 3.846285000 | 2.226138000  | -0.626398000 |
| 1 | 3.349945000 | 1.842071000  | 1.424198000  |
| 6 | 3.520593000 | 1.997375000  | -1.965269000 |
| 1 | 2.177129000 | 0.998029000  | -3.328928000 |
| 1 | 4.692779000 | 2.856371000  | -0.370683000 |
| 1 | 4.114916000 | 2.449277000  | -2.753775000 |

**TSIVa-i**

E = -3924.258873      ZPVE = 0.196301      NIMAG = 1.

|    |           |           |           |
|----|-----------|-----------|-----------|
| 17 | 1.195023  | 2.792083  | -0.823913 |
| 6  | -0.297412 | -0.97677  | 1.610633  |
| 1  | -1.195285 | -0.81606  | 2.244698  |
| 1  | 0.52926   | -1.047894 | 2.314123  |
| 6  | -0.419691 | -2.282472 | 0.799468  |
| 1  | 0.55174   | -2.563763 | 0.385039  |
| 1  | -0.802389 | -3.121515 | 1.392778  |
| 1  | -1.104165 | -2.236916 | -0.076381 |
| 15 | 0.504492  | 0.91505   | 0.402816  |
| 12 | -1.670538 | -0.066304 | 0.102161  |
| 35 | -3.933029 | -0.32328  | -0.418497 |
| 6  | 0.820845  | 1.800377  | 1.998671  |
| 1  | 1.840318  | 2.190812  | 1.980464  |
| 1  | 0.144206  | 2.657029  | 2.041817  |
| 1  | 0.670744  | 1.16342   | 2.871253  |
| 6  | 1.976415  | -0.08848  | -0.03943  |
| 6  | 2.132279  | -0.487359 | -1.375077 |
| 6  | 2.944492  | -0.460462 | 0.903436  |

|   |          |           |           |
|---|----------|-----------|-----------|
| 6 | 3.228479 | -1.263132 | -1.757223 |
| 1 | 1.416275 | -0.163813 | -2.125183 |
| 6 | 4.048023 | -1.224878 | 0.516617  |
| 1 | 2.850228 | -0.15482  | 1.940954  |
| 6 | 4.189509 | -1.632655 | -0.812502 |
| 1 | 3.33818  | -1.564112 | -2.794812 |
| 1 | 4.795735 | -1.500237 | 1.25469   |
| 1 | 5.047242 | -2.227847 | -1.111262 |

**PC<sub>IVa-i</sub>**

E = -3924.378831    ZPVE = 0.199352    NIMAG = 0.

|    |           |           |           |
|----|-----------|-----------|-----------|
| 17 | -0.876211 | 3.176042  | -0.176871 |
| 6  | 0.107057  | -2.110515 | -0.892145 |
| 1  | -0.834813 | -2.589567 | -0.602553 |
| 1  | 0.907846  | -2.846382 | -0.754905 |
| 6  | 0.034401  | -1.640508 | -2.349925 |
| 1  | 0.943886  | -1.113275 | -2.655645 |
| 1  | -0.095158 | -2.497075 | -3.018978 |
| 1  | -0.821105 | -0.974475 | -2.506086 |
| 15 | 0.35417   | -0.718762 | 0.316095  |
| 12 | -1.540903 | 1.045917  | 0.016312  |
| 35 | -3.407052 | -0.443129 | 0.143645  |
| 6  | 0.193868  | -1.571786 | 1.950154  |
| 1  | 0.404096  | -0.865153 | 2.757662  |
| 1  | -0.834907 | -1.927758 | 2.054918  |
| 1  | 0.88221   | -2.417898 | 2.034499  |
| 6  | 2.124099  | -0.245244 | 0.183997  |
| 6  | 2.454779  | 1.105847  | -0.008003 |

|   |          |           |           |
|---|----------|-----------|-----------|
| 6 | 3.156329 | -1.195044 | 0.282178  |
| 6 | 3.794014 | 1.497394  | -0.102988 |
| 1 | 1.671448 | 1.855267  | -0.082635 |
| 6 | 4.491179 | -0.801225 | 0.186185  |
| 1 | 2.926023 | -2.2464   | 0.43349   |
| 6 | 4.811651 | 0.547098  | -0.007136 |
| 1 | 4.035608 | 2.545384  | -0.252379 |
| 1 | 5.280028 | -1.543887 | 0.262542  |
| 1 | 5.851269 | 0.85232   | -0.081798 |

**P<sub>IVa-i</sub>**

E = -692.176821      ZPVE = 0.195001      NIMAG = 0.

|    |           |           |           |
|----|-----------|-----------|-----------|
| 6  | 2.25932   | 0.686397  | 0.540459  |
| 1  | 3.323543  | 0.419995  | 0.503621  |
| 1  | 1.914294  | 0.472844  | 1.560486  |
| 6  | 2.08052   | 2.174389  | 0.214471  |
| 1  | 1.026774  | 2.468606  | 0.262563  |
| 1  | 2.632536  | 2.798566  | 0.9261    |
| 1  | 2.44696   | 2.407814  | -0.791073 |
| 15 | 1.405649  | -0.447517 | -0.689098 |
| 6  | 1.755744  | -2.089705 | 0.129997  |
| 1  | 1.497794  | -2.109279 | 1.194578  |
| 1  | 1.193253  | -2.876159 | -0.381584 |
| 1  | 2.822007  | -2.315266 | 0.024428  |
| 6  | -0.382364 | -0.196535 | -0.23977  |
| 6  | -1.27533  | 0.146479  | -1.267398 |
| 6  | -0.889846 | -0.328394 | 1.064368  |
| 6  | -2.633917 | 0.352347  | -1.004595 |

|   |           |           |           |
|---|-----------|-----------|-----------|
| 1 | -0.900694 | 0.251788  | -2.282343 |
| 6 | -2.244919 | -0.124372 | 1.332223  |
| 1 | -0.227154 | -0.592669 | 1.884536  |
| 6 | -3.121422 | 0.216998  | 0.296573  |
| 1 | -3.307346 | 0.616975  | -1.815091 |
| 1 | -2.617663 | -0.231504 | 2.347379  |
| 1 | -4.175765 | 0.375421  | 0.504889  |

**R1<sub>v</sub> + a S<sub>N</sub>2@P-b pathway**

**RC<sub>Va-i</sub>**

E = -3732.545114      ZPVE = 0.142563      NIMAG = 0.

|    |           |           |           |
|----|-----------|-----------|-----------|
| 17 | -1.923239 | -2.203023 | -0.236867 |
| 6  | 0.554199  | 2.884216  | 0.586853  |
| 1  | 1.411869  | 3.307466  | 1.131151  |
| 1  | -0.286402 | 2.952302  | 1.296082  |
| 6  | 0.253666  | 3.76964   | -0.642051 |
| 1  | -0.60635  | 3.404572  | -1.220728 |
| 1  | 0.025416  | 4.81083   | -0.369665 |
| 1  | 1.103051  | 3.804741  | -1.335336 |
| 15 | -1.5693   | -0.165096 | 0.057371  |
| 12 | 0.992115  | 0.842326  | 0.224527  |
| 35 | 2.44587   | -1.025679 | -0.042536 |
| 6  | -2.605273 | 0.585366  | -1.271562 |
| 1  | -2.195145 | 0.324291  | -2.250278 |
| 1  | -3.643181 | 0.246298  | -1.212424 |
| 1  | -2.568373 | 1.674373  | -1.15788  |
| 6  | -2.573465 | 0.169303  | 1.56833   |
| 1  | -3.613166 | -0.143197 | 1.438041  |
| 1  | -2.142055 | -0.359467 | 2.421972  |



|   |           |          |          |
|---|-----------|----------|----------|
| 1 | -2.536688 | 1.245336 | 1.770269 |
|---|-----------|----------|----------|

**TS<sub>Va-i</sub>**

E = -3732.515826    ZPVE = 0.143017    NIMAG = 1.

|    |           |           |           |
|----|-----------|-----------|-----------|
| 17 | -2.851143 | -1.85672  | -0.459507 |
| 6  | -0.253332 | 1.929923  | 0.586475  |
| 1  | 0.474806  | 1.832077  | 1.419492  |
| 1  | -1.046363 | 2.557492  | 0.991977  |
| 6  | 0.408401  | 2.608285  | -0.631043 |
| 1  | -0.342613 | 2.914563  | -1.365343 |
| 1  | 0.999212  | 3.492527  | -0.363909 |
| 1  | 1.118971  | 1.967246  | -1.19547  |
| 15 | -1.59758  | 0.046934  | 0.092182  |
| 12 | 0.799805  | 0.038957  | -0.01366  |
| 35 | 3.04632   | -0.606472 | -0.009246 |
| 6  | -2.65203  | 1.130498  | -0.980918 |
| 1  | -2.40457  | 0.950642  | -2.029618 |
| 1  | -3.688987 | 0.826821  | -0.82773  |
| 1  | -2.531965 | 2.188569  | -0.744779 |
| 6  | -2.322612 | 0.10113   | 1.798605  |
| 1  | -3.410338 | 0.14185   | 1.705797  |
| 1  | -2.07069  | -0.828357 | 2.313824  |
| 1  | -1.96576  | 0.956834  | 2.373462  |

**PC<sub>Va-i</sub>**

E = -3732.634254    ZPVE = 0.145595    NIMAG = 0.

|    |           |           |           |
|----|-----------|-----------|-----------|
| 17 | -0.696739 | 3.119922  | -0.314029 |
| 6  | 1.832756  | -1.653125 | -0.651826 |
| 1  | 1.175947  | -2.418255 | -0.222912 |
| 1  | 2.86725   | -1.992956 | -0.516438 |
| 6  | 1.499641  | -1.45976  | -2.137516 |
| 1  | 2.122173  | -0.688927 | -2.604272 |
| 1  | 1.664124  | -2.391496 | -2.687801 |
| 1  | 0.448413  | -1.183933 | -2.270601 |
| 15 | 1.571398  | -0.124111 | 0.369133  |
| 12 | -0.785656 | 0.901713  | -0.037622 |
| 35 | -2.154913 | -1.048615 | 0.145244  |
| 6  | 3.057401  | 0.924356  | 0.052837  |
| 1  | 3.069916  | 1.243489  | -0.992745 |
| 1  | 3.003109  | 1.823841  | 0.672147  |
| 1  | 3.983202  | 0.384198  | 0.276209  |
| 6  | 1.814788  | -0.730816 | 2.096938  |
| 1  | 2.776744  | -1.241737 | 2.208118  |
| 1  | 1.777198  | 0.10997   | 2.79566   |
| 1  | 1.007833  | -1.424153 | 2.349469  |

**P<sub>Va-i</sub>**

E = -500.432930      ZPVE = 0.141195      NIMAG = 0.

|   |          |           |           |
|---|----------|-----------|-----------|
| 6 | 1.013989 | -0.690442 | 0.359012  |
| 1 | 1.049471 | -1.764342 | 0.135607  |
| 1 | 0.83543  | -0.595286 | 1.439352  |
| 6 | 2.35109  | -0.041163 | -0.023342 |
| 1 | 2.368163 | 1.026179  | 0.222943  |
| 1 | 3.1825   | -0.512744 | 0.512527  |

|    |           |           |           |
|----|-----------|-----------|-----------|
| 1  | 2.546741  | -0.137864 | -1.096746 |
| 15 | -0.450298 | -0.001472 | -0.589938 |
| 6  | -0.672597 | 1.633554  | 0.284503  |
| 1  | 0.140011  | 2.314918  | 0.014886  |
| 1  | -1.609351 | 2.094831  | -0.044555 |
| 1  | -0.697523 | 1.526656  | 1.376238  |
| 6  | -1.816752 | -0.970037 | 0.234022  |
| 1  | -1.772253 | -0.9151   | 1.328767  |
| 1  | -2.787093 | -0.586222 | -0.096835 |
| 1  | -1.75601  | -2.020434 | -0.068274 |

**RI + a SN2@P-f pathway**

**RC<sub>Ia-r</sub>**

E = -4276.923179      ZPVE = 0.431496      NIMAG = 0.

|   |           |           |           |
|---|-----------|-----------|-----------|
| 6 | -1.228107 | -0.880731 | 0.486262  |
| 6 | -2.023716 | -3.128124 | -0.406313 |
| 6 | -3.757516 | -1.431814 | 0.430239  |
| 6 | -2.612243 | -0.716854 | 1.169115  |
| 6 | -3.404425 | -2.914375 | 0.234408  |
| 6 | 0.534578  | -2.730006 | -0.143466 |
| 6 | -5.090387 | -1.25278  | 1.166569  |
| 6 | 1.604231  | -2.256075 | 0.858535  |
| 6 | 0.758215  | -4.229244 | -0.413847 |
| 1 | -0.488185 | -0.379631 | 1.118805  |
| 1 | -1.818766 | -4.201591 | -0.438648 |
| 1 | -2.038946 | -2.785825 | -1.45052  |
| 1 | -3.865121 | -0.976817 | -0.567945 |
| 1 | -2.852077 | 0.341312  | 1.3077    |

|    |           |           |           |
|----|-----------|-----------|-----------|
| 1  | -2.524399 | -1.147371 | 2.177692  |
| 1  | -4.175736 | -3.405842 | -0.371997 |
| 1  | -3.421866 | -3.408796 | 1.217733  |
| 1  | 0.696318  | -2.207925 | -1.094332 |
| 1  | -5.351775 | -0.193554 | 1.26807   |
| 1  | -5.90722  | -1.751338 | 0.632905  |
| 1  | -5.039507 | -1.683107 | 2.174625  |
| 1  | 1.615428  | -2.902975 | 1.744586  |
| 1  | 2.603768  | -2.281725 | 0.413163  |
| 1  | 1.408951  | -1.243275 | 1.235331  |
| 1  | 0.497469  | -4.835112 | 0.463482  |
| 1  | 1.814147  | -4.412658 | -0.638993 |
| 1  | 0.175573  | -4.593158 | -1.26427  |
| 6  | -1.87054  | 1.692831  | -0.742329 |
| 6  | -2.929968 | 2.185604  | -1.521919 |
| 6  | -1.358865 | 2.488849  | 0.297502  |
| 6  | -3.488441 | 3.438949  | -1.250741 |
| 1  | -3.317619 | 1.59057   | -2.344843 |
| 6  | -1.913101 | 3.739791  | 0.562577  |
| 1  | -0.526613 | 2.13975   | 0.899783  |
| 6  | -2.980565 | 4.215929  | -0.20872  |
| 1  | -4.309047 | 3.807363  | -1.859108 |
| 1  | -1.509141 | 4.34551   | 1.368407  |
| 1  | -3.407465 | 5.192543  | -0.000043 |
| 17 | 0.871646  | 0.521898  | -1.464387 |
| 6  | -0.898191 | -2.405443 | 0.365736  |
| 1  | -0.941847 | -2.7797   | 1.403134  |
| 6  | 1.835925  | 1.674198  | 2.241228  |
| 1  | 1.58724   | 2.718255  | 1.99104   |
| 1  | 0.876364  | 1.213662  | 2.525484  |

|    |           |          |           |
|----|-----------|----------|-----------|
| 6  | 2.78163   | 1.664359 | 3.462267  |
| 1  | 2.353948  | 2.176403 | 4.337187  |
| 1  | 3.026803  | 0.643247 | 3.781344  |
| 1  | 3.735468  | 2.15871  | 3.240567  |
| 15 | -1.251684 | 0.019216 | -1.192971 |
| 12 | 2.624438  | 0.770359 | 0.500783  |
| 35 | 4.566194  | 0.157939 | -0.743234 |

**TS<sub>1a-r</sub>**

E = -4276.885950      ZPVE = 0.429632      NIMAG = 1.

|   |           |          |           |
|---|-----------|----------|-----------|
| 6 | -1.548703 | 0.926228 | -0.698527 |
| 6 | -1.496737 | 3.089133 | 0.636007  |
| 6 | -3.758029 | 1.929098 | 0.238943  |
| 6 | -3.090186 | 1.122285 | -0.892285 |
| 6 | -3.014912 | 3.257827 | 0.46024   |
| 6 | 0.680447  | 2.253734 | -0.564875 |
| 6 | -5.247076 | 2.150384 | -0.051605 |
| 6 | 1.201452  | 1.88053  | -1.965103 |
| 6 | 1.370049  | 3.54755  | -0.103127 |
| 1 | -1.152871 | 0.426288 | -1.587326 |
| 1 | -1.041754 | 4.080242 | 0.714391  |
| 1 | -1.278476 | 2.57832  | 1.584139  |
| 1 | -3.68255  | 1.345906 | 1.17065   |
| 1 | -3.596081 | 0.158244 | -1.0155   |
| 1 | -3.218552 | 1.66515  | -1.840748 |
| 1 | -3.437758 | 3.774782 | 1.330514  |
| 1 | -3.200776 | 3.909068 | -0.407602 |
| 1 | 0.988324  | 1.472093 | 0.149518  |

|    |           |           |           |
|----|-----------|-----------|-----------|
| 1  | -5.779439 | 1.199496  | -0.167701 |
| 1  | -5.727942 | 2.706658  | 0.760374  |
| 1  | -5.38392  | 2.725987  | -0.97577  |
| 1  | 0.985771  | 2.693042  | -2.670479 |
| 1  | 2.283821  | 1.727853  | -1.943065 |
| 1  | 0.749388  | 0.967195  | -2.364417 |
| 1  | 1.063299  | 4.400784  | -0.721849 |
| 1  | 2.454256  | 3.435049  | -0.195054 |
| 1  | 1.154146  | 3.785582  | 0.941985  |
| 6  | -1.719279 | -1.817871 | 0.2052    |
| 6  | -1.810871 | -2.808999 | 1.221685  |
| 6  | -1.985401 | -2.204187 | -1.133301 |
| 6  | -2.190387 | -4.109514 | 0.916611  |
| 1  | -1.567755 | -2.539    | 2.245315  |
| 6  | -2.379588 | -3.505924 | -1.429268 |
| 1  | -1.904191 | -1.483578 | -1.938174 |
| 6  | -2.484349 | -4.457733 | -0.409063 |
| 1  | -2.256078 | -4.853816 | 1.70388   |
| 1  | -2.592463 | -3.784003 | -2.456858 |
| 1  | -2.785445 | -5.473633 | -0.647503 |
| 17 | 1.158709  | -0.861761 | 2.494393  |
| 6  | -0.871467 | 2.322074  | -0.546911 |
| 1  | -1.159411 | 2.874674  | -1.4572   |
| 6  | 1.36816   | -1.969461 | -1.161124 |
| 1  | 0.779413  | -2.735189 | -0.643544 |
| 1  | 0.700417  | -1.34505  | -1.763089 |
| 6  | 2.511995  | -2.547022 | -1.993118 |
| 1  | 2.13936   | -3.122431 | -2.858029 |
| 1  | 3.170104  | -1.766767 | -2.391358 |
| 1  | 3.140451  | -3.23306  | -1.412295 |

|    |           |           |          |
|----|-----------|-----------|----------|
| 15 | -1.335323 | -0.179756 | 0.808218 |
| 12 | 2.272629  | -0.784062 | 0.46222  |
| 35 | 4.285892  | 0.480467  | 0.06857  |

**PC<sub>1a-r</sub>**

E = -4277.019369    ZPVE = 0.434798    NIMAG = 0.

|   |           |          |           |
|---|-----------|----------|-----------|
| 6 | -0.22648  | 1.725563 | -0.689197 |
| 6 | 1.473286  | 1.956864 | 1.201894  |
| 6 | -1.030366 | 2.159659 | 1.730943  |
| 6 | -1.262622 | 2.415639 | 0.231927  |
| 6 | 0.400172  | 2.56809  | 2.114377  |
| 6 | 2.35739   | 1.735905 | -1.231158 |
| 6 | -2.076376 | 2.882243 | 2.588262  |
| 6 | 2.157736  | 2.236239 | -2.673528 |
| 6 | 3.744299  | 2.184752 | -0.734018 |
| 1 | -0.436552 | 2.036728 | -1.719343 |
| 1 | 2.447732  | 2.366201 | 1.479724  |
| 1 | 1.564062  | 0.874771 | 1.390405  |
| 1 | -1.138898 | 1.081493 | 1.922967  |
| 1 | -2.280097 | 2.124732 | -0.046084 |
| 1 | -1.190771 | 3.497705 | 0.045757  |
| 1 | 0.601676  | 2.295913 | 3.157565  |
| 1 | 0.47837   | 3.664513 | 2.058427  |
| 1 | 2.377042  | 0.639525 | -1.236381 |
| 1 | -3.091414 | 2.556362 | 2.335555  |
| 1 | -1.916687 | 2.68311  | 3.65345   |
| 1 | -2.024663 | 3.968171 | 2.438245  |
| 1 | 2.17766   | 3.333201 | -2.707705 |

|    |           |           |           |
|----|-----------|-----------|-----------|
| 1  | 2.962646  | 1.872243  | -3.320732 |
| 1  | 1.21312   | 1.909532  | -3.117948 |
| 1  | 3.777111  | 3.268454  | -0.560647 |
| 1  | 4.504205  | 1.946976  | -1.485669 |
| 1  | 4.038044  | 1.677955  | 0.188318  |
| 6  | -2.292859 | -0.407198 | -0.774326 |
| 6  | -2.945986 | -1.099509 | 0.257539  |
| 6  | -3.050171 | 0.063967  | -1.861913 |
| 6  | -4.328136 | -1.308841 | 0.205323  |
| 1  | -2.384201 | -1.469355 | 1.110826  |
| 6  | -4.427951 | -0.149358 | -1.913739 |
| 1  | -2.570346 | 0.601726  | -2.675172 |
| 6  | -5.070207 | -0.83766  | -0.878529 |
| 1  | -4.817257 | -1.84501  | 1.013064  |
| 1  | -4.999307 | 0.220255  | -2.760392 |
| 1  | -6.14268  | -1.004019 | -0.91965  |
| 17 | -0.398903 | -2.005199 | 2.983248  |
| 6  | 1.208416  | 2.20978   | -0.29724  |
| 1  | 1.16039   | 3.306159  | -0.414042 |
| 6  | 0.097267  | -0.770431 | -2.361412 |
| 1  | -0.424229 | -0.20953  | -3.14526  |
| 1  | 1.162228  | -0.544257 | -2.446865 |
| 6  | -0.118907 | -2.281566 | -2.526407 |
| 1  | 0.219954  | -2.600204 | -3.517623 |
| 1  | 0.464675  | -2.841726 | -1.788828 |
| 1  | -1.172792 | -2.558519 | -2.427071 |
| 15 | -0.46698  | -0.162022 | -0.690441 |
| 12 | 0.797742  | -1.506523 | 1.148946  |
| 35 | 2.914374  | -1.998884 | 0.143325  |



**P<sub>Ia-r</sub>**

E = -1044.804084      ZPVE = 0.430657      NIMAG = 0.

|   |           |           |           |
|---|-----------|-----------|-----------|
| 6 | -0.876857 | 0.020668  | -0.874721 |
| 6 | -2.416462 | 1.137814  | 0.841876  |
| 6 | -3.250944 | -0.905888 | -0.473623 |
| 6 | -2.136011 | -0.63414  | -1.495248 |
| 6 | -3.625232 | 0.40533   | 0.234697  |
| 6 | -0.08975  | 2.203759  | 0.355139  |
| 6 | -4.470309 | -1.565956 | -1.129149 |
| 6 | 0.844872  | 2.648813  | -0.784524 |
| 6 | -0.547653 | 3.449839  | 1.136526  |
| 1 | -0.211135 | 0.26603   | -1.711303 |
| 1 | -2.759978 | 2.104419  | 1.222932  |
| 1 | -2.042807 | 0.584132  | 1.710696  |
| 1 | -2.859041 | -1.606901 | 0.279987  |
| 1 | -1.859036 | -1.563976 | -2.005452 |
| 1 | -2.533462 | 0.04362   | -2.267159 |
| 1 | -4.372573 | 0.213147  | 1.01599   |
| 1 | -4.110084 | 1.067607  | -0.49919  |
| 1 | 0.494788  | 1.58146   | 1.044038  |
| 1 | -4.201481 | -2.517011 | -1.602752 |
| 1 | -5.257335 | -1.767806 | -0.393203 |
| 1 | -4.897719 | -0.916102 | -1.903406 |
| 1 | 0.302737  | 3.278629  | -1.502123 |
| 1 | 1.678524  | 3.239592  | -0.389666 |
| 1 | 1.277686  | 1.807113  | -1.329413 |
| 1 | -1.215832 | 4.074712  | 0.529428  |
| 1 | 0.318328  | 4.063701  | 1.407918  |

|    |           |           |           |
|----|-----------|-----------|-----------|
| 1  | -1.072345 | 3.198618  | 2.062654  |
| 6  | 1.899738  | -0.754305 | -0.211836 |
| 6  | 2.49473   | -0.938052 | -1.474365 |
| 6  | 2.691163  | -0.204988 | 0.809939  |
| 6  | 3.814183  | -0.552801 | -1.718915 |
| 1  | 1.918619  | -1.398168 | -2.274197 |
| 6  | 4.018702  | 0.165328  | 0.57498   |
| 1  | 2.278601  | -0.053048 | 1.802398  |
| 6  | 4.584154  | 0.000085  | -0.691522 |
| 1  | 4.244626  | -0.699015 | -2.705801 |
| 1  | 4.608805  | 0.588224  | 1.383718  |
| 1  | 5.61491   | 0.290152  | -0.873596 |
| 6  | -1.279329 | 1.359113  | -0.180214 |
| 1  | -1.725669 | 1.962937  | -0.991723 |
| 6  | -0.119471 | -1.29373  | 1.834399  |
| 1  | -1.198498 | -1.399524 | 1.983286  |
| 1  | 0.162639  | -0.331045 | 2.275344  |
| 6  | 0.596719  | -2.451613 | 2.549864  |
| 1  | 0.378398  | -2.433492 | 3.623752  |
| 1  | 0.268177  | -3.418526 | 2.155022  |
| 1  | 1.683095  | -2.399236 | 2.429933  |
| 15 | 0.152906  | -1.359727 | -0.019863 |

**R1<sub>II</sub> + a** SN2@P-f pathway

**RC<sub>IIa-r</sub>**

E = -3968.432239      ZPVE = 0.311808      NIMAG = 0.

|    |           |           |           |
|----|-----------|-----------|-----------|
| 15 | -1.379714 | -0.1098   | 0.374098  |
| 17 | 0.061863  | 1.16497   | -0.689442 |
| 6  | -1.993312 | -1.201238 | -1.073249 |

|    |           |           |           |
|----|-----------|-----------|-----------|
| 6  | -0.7358   | -1.85768  | -1.690431 |
| 1  | -1.052512 | -2.695361 | -2.323668 |
| 1  | -0.186166 | -1.155618 | -2.323281 |
| 1  | -0.048787 | -2.243997 | -0.931313 |
| 6  | -2.814084 | -0.52696  | -2.181782 |
| 1  | -2.998281 | -1.253453 | -2.983678 |
| 1  | -3.789033 | -0.182245 | -1.826462 |
| 1  | -2.282968 | 0.321909  | -2.622856 |
| 6  | -2.823788 | -2.316588 | -0.388541 |
| 1  | -3.111824 | -3.052705 | -1.148823 |
| 1  | -2.245189 | -2.843241 | 0.377422  |
| 1  | -3.74379  | -1.943892 | 0.068892  |
| 6  | 5.23456   | 1.894203  | -0.745791 |
| 1  | 5.617851  | 1.010726  | -1.27149  |
| 1  | 5.548997  | 1.797048  | 0.300862  |
| 1  | 5.767967  | 2.76425   | -1.157488 |
| 6  | 3.703132  | 2.023258  | -0.87778  |
| 1  | 3.366693  | 2.945036  | -0.378732 |
| 1  | 3.434982  | 2.162296  | -1.936318 |
| 12 | 2.543078  | 0.43466   | -0.121062 |
| 35 | 2.237428  | -1.683572 | 0.966136  |
| 6  | -2.643442 | 1.258873  | 0.831302  |
| 6  | -3.036482 | 2.282099  | -0.24714  |
| 1  | -3.57     | 1.828729  | -1.083714 |
| 1  | -3.70173  | 3.030823  | 0.201853  |
| 1  | -2.165682 | 2.811919  | -0.641748 |
| 6  | -1.971352 | 2.001899  | 2.011126  |
| 1  | -2.672388 | 2.739628  | 2.420494  |
| 1  | -1.6914   | 1.317638  | 2.81875   |
| 1  | -1.073206 | 2.539906  | 1.692854  |

|   |           |           |          |
|---|-----------|-----------|----------|
| 6 | -3.901765 | 0.533748  | 1.359708 |
| 1 | -4.488937 | 0.085206  | 0.55378  |
| 1 | -3.65936  | -0.246672 | 2.090495 |
| 1 | -4.544125 | 1.264004  | 1.866662 |

**TS<sub>IIa-r</sub>**

E = -3968.390977      ZPVE = 0.310744      NIMAG = 1.

|    |           |           |           |
|----|-----------|-----------|-----------|
| 15 | -1.320897 | -0.096309 | 0.633886  |
| 17 | 0.029645  | -0.44288  | -2.176533 |
| 6  | -2.885797 | -0.791324 | -0.196709 |
| 6  | -2.581391 | -2.261737 | -0.567285 |
| 1  | -3.516441 | -2.746965 | -0.87287  |
| 1  | -1.872747 | -2.325732 | -1.395127 |
| 1  | -2.181479 | -2.825711 | 0.281919  |
| 6  | -3.478514 | -0.063039 | -1.41054  |
| 1  | -4.336317 | -0.637708 | -1.782668 |
| 1  | -3.845579 | 0.933976  | -1.153406 |
| 1  | -2.753465 | 0.024621  | -2.222123 |
| 6  | -3.922996 | -0.801341 | 0.96687   |
| 1  | -4.82227  | -1.318943 | 0.609844  |
| 1  | -3.558611 | -1.341126 | 1.846875  |
| 1  | -4.22277  | 0.202878  | 1.276987  |
| 6  | 1.1536    | -1.659089 | 2.556058  |
| 1  | 0.34689   | -0.98024  | 2.867353  |
| 1  | 2.107997  | -1.132857 | 2.661751  |
| 1  | 1.151527  | -2.488854 | 3.281483  |
| 6  | 0.936159  | -2.153299 | 1.145959  |
| 1  | 1.79117   | -2.740907 | 0.766649  |

|    |           |           |           |
|----|-----------|-----------|-----------|
| 1  | 0.017178  | -2.718052 | 0.996222  |
| 12 | 1.521395  | -0.72137  | -0.447824 |
| 35 | 3.679579  | 0.266962  | -0.171266 |
| 6  | -1.173589 | 1.796525  | 0.449937  |
| 6  | -1.294659 | 2.47499   | -0.923686 |
| 1  | -2.27346  | 2.328958  | -1.380945 |
| 1  | -1.14916  | 3.554451  | -0.78886  |
| 1  | -0.537388 | 2.113797  | -1.620381 |
| 6  | 0.198306  | 2.148264  | 1.071982  |
| 1  | 0.273472  | 3.236324  | 1.186106  |
| 1  | 0.332924  | 1.701473  | 2.062916  |
| 1  | 1.039194  | 1.842408  | 0.439961  |
| 6  | -2.290821 | 2.330962  | 1.393147  |
| 1  | -3.28619  | 2.219287  | 0.955648  |
| 1  | -2.28412  | 1.856951  | 2.381282  |
| 1  | -2.114646 | 3.402857  | 1.547964  |

**PCIIa-r**

E = -3968.484826    ZPVE = 0.314715    NIMAG = 0.

|    |           |           |           |
|----|-----------|-----------|-----------|
| 15 | 1.788919  | -0.710364 | 0.795021  |
| 17 | -1.341586 | 2.787274  | -1.372616 |
| 6  | 2.913672  | 0.783891  | 0.336603  |
| 6  | 2.813652  | 1.777658  | 1.516372  |
| 1  | 3.574819  | 2.5581    | 1.394     |
| 1  | 1.842976  | 2.281367  | 1.556674  |
| 1  | 2.993318  | 1.289741  | 2.480858  |
| 6  | 2.592433  | 1.533802  | -0.968284 |
| 1  | 3.264942  | 2.396492  | -1.064959 |

|    |           |           |           |
|----|-----------|-----------|-----------|
| 1  | 2.746065  | 0.909342  | -1.852687 |
| 1  | 1.570376  | 1.924428  | -0.994969 |
| 6  | 4.36721   | 0.260295  | 0.291337  |
| 1  | 5.054767  | 1.10489   | 0.155775  |
| 1  | 4.638766  | -0.247941 | 1.222404  |
| 1  | 4.537847  | -0.435018 | -0.534044 |
| 6  | -0.183849 | 0.316631  | 2.657914  |
| 1  | 0.511134  | 1.02147   | 3.119726  |
| 1  | -0.103351 | -0.633285 | 3.193836  |
| 1  | -1.202179 | 0.694783  | 2.805653  |
| 6  | 0.119585  | 0.109273  | 1.16432   |
| 1  | -0.625774 | -0.598277 | 0.774478  |
| 1  | 0.072431  | 1.072401  | 0.623815  |
| 12 | -1.954125 | 0.895488  | -0.391068 |
| 35 | -3.58107  | -0.651409 | 0.315975  |
| 6  | 1.324715  | -1.714933 | -0.786425 |
| 6  | 0.389246  | -1.026048 | -1.802548 |
| 1  | 0.744769  | -0.050197 | -2.136695 |
| 1  | 0.273253  | -1.661092 | -2.689955 |
| 1  | -0.631315 | -0.925022 | -1.401192 |
| 6  | 0.61612   | -2.983108 | -0.25286  |
| 1  | 0.326744  | -3.625911 | -1.094092 |
| 1  | 1.272237  | -3.559739 | 0.405939  |
| 1  | -0.299199 | -2.751275 | 0.303573  |
| 6  | 2.612976  | -2.156397 | -1.50957  |
| 1  | 3.108861  | -1.326756 | -2.020376 |
| 1  | 3.328674  | -2.61141  | -0.816571 |
| 1  | 2.365372  | -2.90822  | -2.269505 |

**R1<sub>III</sub> + a S<sub>N</sub>2@P-f pathway**

**R1Ma-r**

E = -1264.903326    ZPVE = 0.183787    NIMAG = 0.

|    |           |           |           |
|----|-----------|-----------|-----------|
| 6  | 1.442039  | 0.136966  | 0.352929  |
| 6  | 1.919716  | -0.810519 | 1.275506  |
| 6  | 2.136792  | 0.32231   | -0.850461 |
| 6  | 3.05091   | -1.576256 | 0.987908  |
| 1  | 1.408928  | -0.950219 | 2.225817  |
| 6  | 3.276577  | -0.437128 | -1.131279 |
| 1  | 1.795743  | 1.065366  | -1.563623 |
| 6  | 3.733223  | -1.390293 | -0.217885 |
| 1  | 3.404826  | -2.306895 | 1.709486  |
| 1  | 3.807084  | -0.28069  | -2.066321 |
| 1  | 4.619936  | -1.977268 | -0.43888  |
| 17 | -0.123189 | 2.645065  | -0.53999  |
| 15 | -0.063684 | 1.068332  | 0.893035  |
| 6  | -1.424043 | -0.01073  | 0.260058  |
| 6  | -2.642989 | 0.055546  | 0.955429  |
| 6  | -1.313802 | -0.87425  | -0.842108 |
| 6  | -3.733914 | -0.719721 | 0.553757  |
| 1  | -2.737705 | 0.716013  | 1.813725  |
| 6  | -2.402731 | -1.649774 | -1.241207 |
| 1  | -0.376662 | -0.94378  | -1.385322 |
| 6  | -3.614277 | -1.572952 | -0.545437 |
| 1  | -4.671195 | -0.658669 | 1.099107  |
| 1  | -2.306887 | -2.31498  | -2.094657 |
| 1  | -4.459594 | -2.179156 | -0.858291 |

**RCMa-r**

E = -4116.031804      ZPVE = 0.249112      NIMAG = 0.

|    |              |              |              |
|----|--------------|--------------|--------------|
| 6  | -0.828991000 | 1.411407000  | 0.133864000  |
| 6  | -0.633634000 | 2.540412000  | -0.677895000 |
| 6  | -0.945588000 | 1.574884000  | 1.525327000  |
| 6  | -0.550933000 | 3.813757000  | -0.107962000 |
| 1  | -0.506893000 | 2.420258000  | -1.750147000 |
| 6  | -0.855046000 | 2.846436000  | 2.090517000  |
| 1  | -1.083703000 | 0.709894000  | 2.166893000  |
| 6  | -0.664150000 | 3.968017000  | 1.274522000  |
| 1  | -0.384999000 | 4.678046000  | -0.743770000 |
| 1  | -0.932334000 | 2.964125000  | 3.167518000  |
| 1  | -0.588957000 | 4.955764000  | 1.719702000  |
| 17 | 0.208247000  | -1.468177000 | 0.637182000  |
| 6  | 3.771500000  | -1.940638000 | 1.844955000  |
| 1  | 3.662875000  | -1.338306000 | 2.760594000  |
| 1  | 3.221538000  | -2.870844000 | 2.053102000  |
| 6  | 5.263383000  | -2.259438000 | 1.616572000  |
| 1  | 5.721123000  | -2.775361000 | 2.474117000  |
| 1  | 5.414740000  | -2.905344000 | 0.742480000  |
| 1  | 5.853993000  | -1.351454000 | 1.441851000  |
| 15 | -0.944744000 | -0.181928000 | -0.770200000 |
| 12 | 2.751930000  | -0.921673000 | 0.307065000  |
| 35 | 2.647961000  | 0.543108000  | -1.597306000 |
| 6  | -2.621803000 | -0.814204000 | -0.352268000 |
| 6  | -2.966699000 | -2.049884000 | -0.934688000 |
| 6  | -3.594056000 | -0.117280000 | 0.384271000  |
| 6  | -4.236494000 | -2.593631000 | -0.750165000 |
| 1  | -2.232920000 | -2.591229000 | -1.526717000 |
| 6  | -4.872024000 | -0.656451000 | 0.552556000  |



|   |              |              |              |
|---|--------------|--------------|--------------|
| 1 | -3.361087000 | 0.847715000  | 0.820002000  |
| 6 | -5.193539000 | -1.895515000 | -0.006185000 |
| 1 | -4.483354000 | -3.552707000 | -1.195792000 |
| 1 | -5.615617000 | -0.105636000 | 1.121178000  |
| 1 | -6.186794000 | -2.312950000 | 0.130326000  |

**TS<sub>IIIa-r</sub>**

E = -4115.996535      ZPVE = 0.247938      NIMAG = 1.

|    |           |           |           |
|----|-----------|-----------|-----------|
| 6  | -0.475176 | -1.490386 | 0.302309  |
| 6  | 0.633272  | -2.009824 | 1.023586  |
| 6  | -1.150082 | -2.337175 | -0.612545 |
| 6  | 0.989542  | -3.348478 | 0.896641  |
| 1  | 1.20838   | -1.352931 | 1.671783  |
| 6  | -0.769825 | -3.667888 | -0.749263 |
| 1  | -1.95492  | -1.941409 | -1.222561 |
| 6  | 0.286144  | -4.179884 | 0.017208  |
| 1  | 1.824716  | -3.740095 | 1.468589  |
| 1  | -1.286856 | -4.307434 | -1.458149 |
| 1  | 0.576137  | -5.220819 | -0.09137  |
| 17 | 0.072601  | 2.602435  | -1.29471  |
| 6  | 2.153203  | -0.488113 | -2.150533 |
| 1  | 1.485761  | -1.260603 | -1.74815  |
| 1  | 1.784807  | -0.176276 | -3.134924 |
| 6  | 3.610686  | -0.935756 | -2.172233 |
| 1  | 3.747082  | -1.869294 | -2.746031 |
| 1  | 4.261846  | -0.187031 | -2.639666 |
| 1  | 4.000374  | -1.121503 | -1.164491 |
| 15 | -0.816461 | 0.245945  | 0.608546  |

|    |           |           |           |
|----|-----------|-----------|-----------|
| 12 | 1.857238  | 1.19638   | -0.785091 |
| 35 | 3.051552  | 1.182864  | 1.326183  |
| 6  | -2.58023  | 0.432224  | 0.260691  |
| 6  | -3.071865 | 1.708538  | -0.107056 |
| 6  | -3.514785 | -0.587551 | 0.572773  |
| 6  | -4.440996 | 1.938434  | -0.197048 |
| 1  | -2.369807 | 2.497662  | -0.353218 |
| 6  | -4.883321 | -0.341229 | 0.496757  |
| 1  | -3.169971 | -1.55896  | 0.908187  |
| 6  | -5.350107 | 0.917295  | 0.103852  |
| 1  | -4.800951 | 2.916187  | -0.501852 |
| 1  | -5.585792 | -1.12957  | 0.750024  |
| 1  | -6.418027 | 1.103467  | 0.037549  |

**PCIIIa-r**

E = -4116.122655    ZPVE = 0.253125    NIMAG = 0.

|    |           |           |           |
|----|-----------|-----------|-----------|
| 6  | -0.968528 | 1.616089  | 0.33528   |
| 6  | -0.112551 | 2.466959  | -0.382117 |
| 6  | -2.187738 | 2.121014  | 0.822758  |
| 6  | -0.473751 | 3.799022  | -0.608702 |
| 1  | 0.835941  | 2.096356  | -0.760148 |
| 6  | -2.541913 | 3.451065  | 0.596869  |
| 1  | -2.867527 | 1.47894   | 1.375267  |
| 6  | -1.684505 | 4.292547  | -0.120627 |
| 1  | 0.19759   | 4.447158  | -1.163833 |
| 1  | -3.485701 | 3.82979   | 0.97824   |
| 1  | -1.960927 | 5.328349  | -0.294863 |
| 17 | 2.1135    | -2.857975 | 1.190363  |

|    |           |           |           |
|----|-----------|-----------|-----------|
| 6  | -0.871968 | -0.463542 | 2.414499  |
| 1  | -1.931549 | -0.245371 | 2.584738  |
| 1  | -0.734877 | -1.540558 | 2.553463  |
| 6  | 0.022743  | 0.314583  | 3.387506  |
| 1  | -0.256481 | 0.083639  | 4.420444  |
| 1  | 1.076407  | 0.041731  | 3.266015  |
| 1  | -0.070447 | 1.396364  | 3.25058   |
| 15 | -0.460216 | -0.123138 | 0.629676  |
| 12 | 1.982858  | -0.888657 | 0.11064   |
| 35 | 3.224138  | 0.670165  | -1.190435 |
| 6  | -1.645268 | -1.177935 | -0.310666 |
| 6  | -1.576319 | -2.572867 | -0.137208 |
| 6  | -2.556258 | -0.649549 | -1.238222 |
| 6  | -2.423866 | -3.415202 | -0.858466 |
| 1  | -0.850512 | -3.008006 | 0.544586  |
| 6  | -3.399575 | -1.498854 | -1.960061 |
| 1  | -2.611606 | 0.421458  | -1.401519 |
| 6  | -3.338874 | -2.880874 | -1.770255 |
| 1  | -2.360515 | -4.48946  | -0.712758 |
| 1  | -4.100197 | -1.076129 | -2.674294 |
| 1  | -3.994758 | -3.538268 | -2.333229 |

**PIIIa-r**

E = -883.919780      ZPVE = 0.248603      NIMAG = 0.

|   |           |           |           |
|---|-----------|-----------|-----------|
| 6 | -1.382185 | -0.012555 | -0.322886 |
| 6 | -1.867393 | -0.873026 | -1.32411  |
| 6 | -2.036573 | -0.008105 | 0.91984   |
| 6 | -2.953203 | -1.717921 | -1.086023 |

|    |           |           |           |
|----|-----------|-----------|-----------|
| 1  | -1.389181 | -0.87719  | -2.300612 |
| 6  | -3.133758 | -0.842179 | 1.157088  |
| 1  | -1.696957 | 0.646401  | 1.716545  |
| 6  | -3.592613 | -1.702711 | 0.157     |
| 1  | -3.306205 | -2.378177 | -1.873266 |
| 1  | -3.626803 | -0.819719 | 2.125203  |
| 1  | -4.444409 | -2.35081  | 0.342259  |
| 6  | 0.081965  | 2.361031  | 0.580276  |
| 1  | 0.044241  | 1.896672  | 1.573147  |
| 1  | 1.069933  | 2.829868  | 0.500785  |
| 6  | -1.014816 | 3.422163  | 0.419214  |
| 1  | -0.922083 | 4.194499  | 1.19109   |
| 1  | -0.947801 | 3.913668  | -0.557222 |
| 1  | -2.016229 | 2.987584  | 0.502453  |
| 15 | 0.060689  | 1.062719  | -0.775613 |
| 6  | 1.51277   | 0.030844  | -0.240921 |
| 6  | 2.753824  | 0.318298  | -0.835128 |
| 6  | 1.450356  | -1.00054  | 0.710012  |
| 6  | 3.904694  | -0.386719 | -0.473269 |
| 1  | 2.817412  | 1.094885  | -1.593855 |
| 6  | 2.598196  | -1.714611 | 1.06475   |
| 1  | 0.501076  | -1.255686 | 1.171148  |
| 6  | 3.829095  | -1.407284 | 0.478238  |
| 1  | 4.854863  | -0.146962 | -0.942542 |
| 1  | 2.529608  | -2.512031 | 1.799833  |
| 1  | 4.720042  | -1.963892 | 0.754737  |

**R1<sub>IV</sub> + a S<sub>N</sub>2@P-f pathway**

**RC<sub>IVa-r</sub>**

E = -3924.285141      ZPVE = 0.195705      NIMAG = 0.

|    |           |           |           |
|----|-----------|-----------|-----------|
| 17 | -0.006099 | -0.507502 | 0.209086  |
| 6  | 2.33493   | 2.452909  | 0.014049  |
| 1  | 1.475732  | 2.725303  | -0.619659 |
| 1  | 2.040236  | 2.748437  | 1.034646  |
| 6  | 3.564644  | 3.281758  | -0.410747 |
| 1  | 4.431284  | 3.081738  | 0.23136   |
| 1  | 3.876987  | 3.052462  | -1.437129 |
| 1  | 3.381516  | 4.365772  | -0.369139 |
| 15 | -1.400784 | 1.106796  | -0.30776  |
| 12 | 2.510951  | 0.351055  | -0.004632 |
| 35 | 3.652565  | -1.738391 | -0.063192 |
| 6  | -1.33122  | 2.024534  | 1.298122  |
| 1  | -1.508876 | 1.398025  | 2.17554   |
| 1  | -0.356517 | 2.511196  | 1.382433  |
| 1  | -2.102984 | 2.802049  | 1.254196  |
| 6  | -2.981843 | 0.184461  | -0.1567   |
| 6  | -3.428983 | -0.464033 | 1.007967  |
| 6  | -3.790317 | 0.159403  | -1.305762 |
| 6  | -4.66232  | -1.112776 | 1.022599  |
| 1  | -2.809737 | -0.47922  | 1.899793  |
| 6  | -5.031503 | -0.483416 | -1.286815 |
| 1  | -3.448064 | 0.643889  | -2.216572 |
| 6  | -5.466929 | -1.119447 | -0.123415 |
| 1  | -4.996801 | -1.616013 | 1.924938  |
| 1  | -5.649536 | -0.491944 | -2.17948  |
| 1  | -6.427749 | -1.625441 | -0.107452 |

**TSIVa-r**

E = -3924.249447      ZPVE = 0.194469      NIMAG = 1.

|    |           |           |           |
|----|-----------|-----------|-----------|
| 17 | -0.085592 | -0.874266 | -0.552354 |
| 6  | -1.284231 | 1.960545  | 0.481157  |
| 1  | -0.567837 | 1.511058  | 1.183059  |
| 1  | -0.842029 | 2.004126  | -0.525867 |
| 6  | -1.860974 | 3.275791  | 0.95096   |
| 1  | -2.6061   | 3.663277  | 0.246577  |
| 1  | -2.35318  | 3.17108   | 1.924641  |
| 1  | -1.094298 | 4.061232  | 1.06755   |
| 15 | 1.766833  | 1.548547  | -0.203283 |
| 12 | -2.175874 | 0.02103   | 0.053231  |
| 35 | -4.290425 | -1.064738 | 0.079248  |
| 6  | 1.66473   | 1.687634  | -2.043499 |
| 1  | 1.330834  | 0.763148  | -2.52114  |
| 1  | 0.963117  | 2.487196  | -2.292786 |
| 1  | 2.654829  | 1.958018  | -2.431299 |
| 6  | 2.941856  | 0.212554  | 0.053739  |
| 6  | 3.439272  | -0.666338 | -0.93495  |
| 6  | 3.44034   | 0.099959  | 1.37367   |
| 6  | 4.413617  | -1.605178 | -0.61578  |
| 1  | 3.052026  | -0.6243   | -1.94669  |
| 6  | 4.411738  | -0.846016 | 1.691001  |
| 1  | 3.060704  | 0.763947  | 2.146184  |
| 6  | 4.900227  | -1.69798  | 0.695657  |
| 1  | 4.788996  | -2.27644  | -1.382147 |
| 1  | 4.78569   | -0.921375 | 2.707292  |
| 1  | 5.655733  | -2.439006 | 0.939712  |

PCIVa-r

E = -3924.359612      ZPVE = 0.198487      NIMAG = 0.

|    |           |           |           |
|----|-----------|-----------|-----------|
| 17 | 1.340835  | 2.100884  | 2.362669  |
| 6  | -2.000574 | 1.196044  | -0.890267 |
| 1  | -1.174958 | 1.046214  | -1.595597 |
| 1  | -1.588923 | 1.671508  | 0.013051  |
| 6  | -3.061963 | 2.109064  | -1.519692 |
| 1  | -3.891849 | 2.30563   | -0.832679 |
| 1  | -2.62331  | 3.075412  | -1.789482 |
| 1  | -3.476304 | 1.663106  | -2.429768 |
| 15 | -2.666515 | -0.510554 | -0.462848 |
| 12 | 1.276815  | 0.742517  | 0.589968  |
| 35 | 2.039479  | 0.374818  | -1.619662 |
| 6  | -3.598227 | -0.125581 | 1.106469  |
| 1  | -3.05787  | 0.530775  | 1.797191  |
| 1  | -4.537678 | 0.364791  | 0.834572  |
| 1  | -3.850069 | -1.057959 | 1.620418  |
| 6  | -1.101067 | -1.27646  | 0.203785  |
| 6  | -0.475573 | -0.895515 | 1.410191  |
| 6  | -0.499007 | -2.294465 | -0.554018 |
| 6  | 0.72797   | -1.500643 | 1.825445  |
| 1  | -0.932951 | -0.154931 | 2.061441  |
| 6  | 0.695116  | -2.896175 | -0.146921 |
| 1  | -0.969829 | -2.613028 | -1.479797 |
| 6  | 1.319477  | -2.496024 | 1.035812  |
| 1  | 1.171451  | -1.211711 | 2.775154  |
| 1  | 1.145372  | -3.668254 | -0.763005 |
| 1  | 2.249989  | -2.958577 | 1.349562  |

**P1V<sub>a-r</sub>**

E = -692.176347      ZPVE = 0.194948      NIMAG = 0.

|    |           |           |           |
|----|-----------|-----------|-----------|
| 6  | 2.019389  | 0.045661  | 1.061529  |
| 1  | 1.588125  | -0.539499 | 1.88238   |
| 1  | 1.740254  | 1.092799  | 1.236408  |
| 6  | 3.546728  | -0.108237 | 1.05692   |
| 1  | 4.013958  | 0.496565  | 0.27206   |
| 1  | 3.972389  | 0.214211  | 2.013767  |
| 1  | 3.841208  | -1.150611 | 0.893716  |
| 15 | 1.215933  | -0.590661 | -0.51373  |
| 6  | 1.662514  | 0.786128  | -1.695587 |
| 1  | 2.729154  | 0.721949  | -1.931838 |
| 1  | 1.106324  | 0.651643  | -2.627993 |
| 1  | 1.451322  | 1.786323  | -1.301071 |
| 6  | -0.567382 | -0.200147 | -0.161597 |
| 6  | -1.490351 | -1.257306 | -0.209564 |
| 6  | -1.044006 | 1.083566  | 0.155944  |
| 6  | -2.847395 | -1.043456 | 0.053726  |
| 1  | -1.140596 | -2.256167 | -0.457737 |
| 6  | -2.397973 | 1.302673  | 0.417951  |
| 1  | -0.358298 | 1.925549  | 0.200529  |
| 6  | -3.303965 | 0.238029  | 0.367811  |
| 1  | -3.544235 | -1.875919 | 0.010665  |
| 1  | -2.746589 | 2.302814  | 0.661112  |
| 1  | -4.357371 | 0.408789  | 0.571146  |

**R1<sub>v</sub> + a S<sub>N2</sub>@P-f pathway**

**RC<sub>V<sub>a-r</sub></sub>**



E = -3732.547871      ZPVE = 0.142471      NIMAG = 0.

|    |           |           |           |
|----|-----------|-----------|-----------|
| 17 | 2.301598  | 0.058876  | 1.560863  |
| 6  | -1.975448 | 2.424008  | -0.124193 |
| 1  | -1.349594 | 3.043624  | 0.53772   |
| 1  | -1.794325 | 2.824221  | -1.134984 |
| 6  | -3.461155 | 2.61823   | 0.242551  |
| 1  | -4.123135 | 2.048615  | -0.421405 |
| 1  | -3.676483 | 2.281531  | 1.264227  |
| 1  | -3.778852 | 3.669851  | 0.181615  |
| 15 | 1.551748  | 0.480337  | -0.350093 |
| 12 | -1.195575 | 0.464385  | -0.080313 |
| 35 | -1.298166 | -1.937765 | -0.02959  |
| 6  | 2.55651   | 1.955933  | -0.812921 |
| 1  | 2.286414  | 2.797723  | -0.17089  |
| 1  | 3.628599  | 1.758622  | -0.727048 |
| 1  | 2.316674  | 2.221058  | -1.848904 |
| 6  | 2.305484  | -0.865208 | -1.351706 |
| 1  | 2.091042  | -0.669264 | -2.408525 |
| 1  | 3.387609  | -0.917358 | -1.203459 |
| 1  | 1.839025  | -1.813169 | -1.07462  |

**TS<sub>Va-r</sub>**

E = -3732.505125      ZPVE = 0.141593      NIMAG = 1.

|    |           |           |           |
|----|-----------|-----------|-----------|
| 17 | -1.067232 | -0.739896 | -1.834915 |
| 6  | -0.289592 | 2.158572  | 0.108958  |
| 1  | -1.271211 | 2.429679  | -0.277878 |
| 1  | -0.226016 | 2.349831  | 1.184703  |

|    |           |           |           |
|----|-----------|-----------|-----------|
| 6  | 0.832488  | 2.84667   | -0.680673 |
| 1  | 1.835985  | 2.565022  | -0.339277 |
| 1  | 0.768151  | 2.646544  | -1.758436 |
| 1  | 0.765031  | 3.941851  | -0.571408 |
| 15 | -1.885477 | -0.361676 | 0.833363  |
| 12 | 0.521158  | 0.1329    | -0.349727 |
| 35 | 2.631969  | -0.638338 | 0.428676  |
| 6  | -3.04066  | 1.036896  | 1.158935  |
| 1  | -2.532821 | 1.863523  | 1.653671  |
| 1  | -3.502724 | 1.398305  | 0.232807  |
| 1  | -3.8425   | 0.660521  | 1.806217  |
| 6  | -3.13231  | -1.619674 | 0.295725  |
| 1  | -3.713133 | -1.866752 | 1.196006  |
| 1  | -3.816721 | -1.253909 | -0.474351 |
| 1  | -2.63133  | -2.518984 | -0.063554 |

**PC<sub>Va-r</sub>**

E = -3732.633660    ZPVE = 0.145712    NIMAG = 0.

|    |           |           |           |
|----|-----------|-----------|-----------|
| 17 | 0.134381  | 2.997406  | -0.162877 |
| 6  | -2.830139 | -0.081672 | 0.736509  |
| 1  | -3.142341 | 0.927341  | 0.443663  |
| 1  | -3.678051 | -0.752784 | 0.549637  |
| 6  | -2.433608 | -0.097321 | 2.21943   |
| 1  | -2.096071 | -1.086314 | 2.54614   |
| 1  | -1.634259 | 0.622096  | 2.42596   |
| 1  | -3.290009 | 0.179118  | 2.842367  |
| 15 | -1.449137 | -0.546793 | -0.414317 |
| 12 | 0.731266  | 0.837705  | -0.089784 |

|    |           |           |           |
|----|-----------|-----------|-----------|
| 35 | 2.502259  | -0.738352 | 0.142814  |
| 6  | -1.239858 | -2.366567 | -0.204154 |
| 1  | -0.845415 | -2.584947 | 0.791429  |
| 1  | -2.186876 | -2.898069 | -0.344653 |
| 1  | -0.508329 | -2.731453 | -0.930204 |
| 6  | -2.227148 | -0.386958 | -2.082601 |
| 1  | -1.537361 | -0.751487 | -2.849211 |
| 1  | -3.158764 | -0.959071 | -2.142882 |
| 1  | -2.439672 | 0.666545  | -2.284765 |

**P<sub>Va-r</sub>**

E = -500.432930      ZPVE = 0.141195      NIMAG = 0.

|    |           |           |           |
|----|-----------|-----------|-----------|
| 6  | 1.013989  | -0.690442 | 0.359012  |
| 1  | 1.049471  | -1.764342 | 0.135607  |
| 1  | 0.83543   | -0.595286 | 1.439352  |
| 6  | 2.35109   | -0.041163 | -0.023342 |
| 1  | 2.368163  | 1.026179  | 0.222943  |
| 1  | 3.1825    | -0.512744 | 0.512527  |
| 1  | 2.546741  | -0.137864 | -1.096746 |
| 15 | -0.450298 | -0.001472 | -0.589938 |
| 6  | -0.672597 | 1.633554  | 0.284503  |
| 1  | 0.140011  | 2.314918  | 0.014886  |
| 1  | -1.609351 | 2.094831  | -0.044555 |
| 1  | -0.697523 | 1.526656  | 1.376238  |
| 6  | -1.816752 | -0.970037 | 0.234022  |
| 1  | -1.772253 | -0.9151   | 1.328767  |
| 1  | -2.787093 | -0.586222 | -0.096835 |
| 1  | -1.75601  | -2.020434 | -0.068274 |

**R1 + b S<sub>N</sub>2@P-b pathway**

**RC<sub>1b-i</sub>**

E = -4543.905902      ZPVE = 0.489525      NIMAG = 0.

|   |          |           |           |
|---|----------|-----------|-----------|
| 6 | 3.796945 | -1.233337 | -0.385231 |
| 6 | 3.095968 | 0.163332  | -0.419111 |
| 6 | 3.179032 | -2.122346 | 0.717229  |
| 6 | 2.491154 | -0.07083  | 2.093676  |
| 6 | 3.094537 | 0.805618  | 0.983727  |
| 6 | 3.180273 | -1.443256 | 2.095901  |
| 6 | 3.92527  | -1.94183  | -1.763974 |
| 6 | 2.59619  | 0.624439  | 3.456068  |
| 6 | 4.668283 | -1.071179 | -2.794167 |
| 6 | 4.639944 | -3.30175  | -1.650693 |
| 1 | 4.829107 | -1.011183 | -0.062755 |
| 1 | 3.709963 | 0.821614  | -1.060073 |
| 1 | 3.747021 | -3.054457 | 0.790303  |
| 1 | 2.155684 | -2.401928 | 0.440795  |
| 1 | 1.425841 | -0.221769 | 1.884204  |
| 1 | 2.607177 | 1.784572  | 0.95826   |
| 1 | 4.14807  | 1.002809  | 1.238456  |
| 1 | 2.697954 | -2.100189 | 2.830698  |
| 1 | 4.221878 | -1.316181 | 2.430633  |
| 1 | 2.91465  | -2.135695 | -2.152051 |
| 1 | 2.057689 | 1.578196  | 3.456193  |
| 1 | 2.159048 | 0.003689  | 4.245456  |
| 1 | 3.643675 | 0.821151  | 3.719603  |
| 1 | 5.670839 | -0.809416 | -2.431538 |

|    |           |           |           |
|----|-----------|-----------|-----------|
| 1  | 4.789436  | -1.614039 | -3.73754  |
| 1  | 4.140892  | -0.141883 | -3.027609 |
| 1  | 5.621277  | -3.193311 | -1.170619 |
| 1  | 4.805564  | -3.725547 | -2.646945 |
| 1  | 4.063744  | -4.03295  | -1.078178 |
| 15 | 1.572618  | 0.253718  | -1.53683  |
| 6  | 0.937722  | 1.960311  | -1.258841 |
| 6  | 0.330518  | 2.4275    | -0.081393 |
| 6  | 1.066658  | 2.836219  | -2.350863 |
| 6  | -0.147812 | 3.735254  | -0.002099 |
| 1  | 0.214262  | 1.780412  | 0.781342  |
| 6  | 0.624859  | 4.159566  | -2.254792 |
| 1  | 1.499739  | 2.482     | -3.283144 |
| 6  | 0.021242  | 4.611262  | -1.079331 |
| 1  | -0.629303 | 4.070456  | 0.911794  |
| 1  | 0.739582  | 4.828081  | -3.102939 |
| 1  | -0.337384 | 5.63419   | -1.010839 |
| 17 | 0.018441  | -0.923657 | -0.531589 |
| 6  | -4.979267 | -2.125263 | -1.115137 |
| 6  | -4.002802 | -1.365161 | -0.479707 |
| 6  | -3.715638 | -0.021126 | -0.742366 |
| 6  | -4.50511  | 0.578221  | -1.729322 |
| 6  | -5.50557  | -0.136867 | -2.409046 |
| 6  | -5.738403 | -1.478733 | -2.102862 |
| 1  | -5.162914 | -3.168138 | -0.877166 |
| 1  | -6.102689 | 0.353051  | -3.173749 |
| 1  | -6.512055 | -2.033391 | -2.626421 |
| 12 | -2.187406 | 0.049791  | 0.699538  |
| 35 | -1.297004 | 0.759357  | 2.822314  |
| 1  | -4.346949 | 1.623524  | -1.988756 |

|   |           |           |          |
|---|-----------|-----------|----------|
| 8 | -3.145956 | -1.872557 | 0.539829 |
| 6 | -3.341588 | -3.186736 | 1.060685 |
| 1 | -2.610759 | -3.312948 | 1.860071 |
| 1 | -4.354021 | -3.290345 | 1.465801 |
| 1 | -3.172586 | -3.938332 | 0.281996 |

**TS<sub>1b-i</sub>**

E = -4543.865002      ZPVE = 0.487912      NIMAG = 1.

|   |             |              |              |
|---|-------------|--------------|--------------|
| 6 | 2.810329000 | -1.832020000 | -1.373476000 |
| 6 | 2.308040000 | -0.773520000 | -0.353559000 |
| 6 | 3.043129000 | -3.175685000 | -0.649703000 |
| 6 | 3.559226000 | -1.982364000 | 1.559524000  |
| 6 | 3.290862000 | -0.647159000 | 0.844869000  |
| 6 | 4.008190000 | -3.040427000 | 0.538934000  |
| 6 | 1.929988000 | -1.949049000 | -2.649540000 |
| 6 | 4.580999000 | -1.808435000 | 2.689399000  |
| 6 | 1.743188000 | -0.592543000 | -3.354932000 |
| 6 | 2.504587000 | -2.963209000 | -3.655666000 |
| 1 | 3.797448000 | -1.469999000 | -1.709733000 |
| 1 | 2.274729000 | 0.211278000  | -0.836372000 |
| 1 | 3.446300000 | -3.915024000 | -1.347766000 |
| 1 | 2.079677000 | -3.574385000 | -0.299271000 |
| 1 | 2.616391000 | -2.328371000 | 2.008475000  |
| 1 | 2.927126000 | 0.102232000  | 1.555893000  |
| 1 | 4.241337000 | -0.263682000 | 0.443884000  |
| 1 | 4.119929000 | -4.011483000 | 1.036972000  |
| 1 | 5.006076000 | -2.767424000 | 0.162016000  |
| 1 | 0.935312000 | -2.310564000 | -2.349003000 |

|    |              |              |              |
|----|--------------|--------------|--------------|
| 1  | 4.237489000  | -1.076577000 | 3.429159000  |
| 1  | 4.753988000  | -2.755470000 | 3.212328000  |
| 1  | 5.545965000  | -1.462204000 | 2.297750000  |
| 1  | 2.713373000  | -0.146823000 | -3.610697000 |
| 1  | 1.180389000  | -0.720861000 | -4.284791000 |
| 1  | 1.186345000  | 0.131008000  | -2.752041000 |
| 1  | 3.529856000  | -2.694544000 | -3.941713000 |
| 1  | 1.900319000  | -2.975380000 | -4.569008000 |
| 1  | 2.521673000  | -3.983246000 | -3.263035000 |
| 15 | 0.526033000  | -1.118312000 | 0.202454000  |
| 6  | 0.228489000  | 0.471781000  | 1.084962000  |
| 6  | -0.365183000 | 0.518159000  | 2.362278000  |
| 6  | 0.495712000  | 1.694519000  | 0.429478000  |
| 6  | -0.655212000 | 1.741381000  | 2.968243000  |
| 1  | -0.575221000 | -0.402437000 | 2.893111000  |
| 6  | 0.182792000  | 2.912999000  | 1.031066000  |
| 1  | 0.922771000  | 1.707936000  | -0.567762000 |
| 6  | -0.387347000 | 2.941839000  | 2.306439000  |
| 1  | -1.094983000 | 1.751422000  | 3.961068000  |
| 1  | 0.385868000  | 3.838805000  | 0.500736000  |
| 1  | -0.621903000 | 3.891193000  | 2.778591000  |
| 17 | -0.326265000 | -2.843654000 | 2.170103000  |
| 6  | -2.365166000 | -1.997087000 | -3.265718000 |
| 6  | -2.078025000 | -2.163660000 | -1.914901000 |
| 6  | -2.057175000 | -1.127802000 | -0.960715000 |
| 6  | -2.301011000 | 0.159949000  | -1.467408000 |
| 6  | -2.567766000 | 0.386691000  | -2.825332000 |
| 6  | -2.603044000 | -0.689089000 | -3.716143000 |
| 1  | -2.410199000 | -2.830383000 | -3.959611000 |
| 1  | -2.764741000 | 1.393251000  | -3.184632000 |

|    |              |              |              |
|----|--------------|--------------|--------------|
| 1  | -2.819909000 | -0.521069000 | -4.767273000 |
| 12 | -2.215914000 | -2.586434000 | 0.666624000  |
| 35 | -4.355040000 | -3.477213000 | 1.273018000  |
| 1  | -2.293167000 | 1.012597000  | -0.790614000 |
| 8  | -1.825232000 | -3.415194000 | -1.317835000 |
| 6  | -2.247915000 | -4.615654000 | -1.980190000 |
| 1  | -2.074358000 | -5.428160000 | -1.274836000 |
| 1  | -3.313153000 | -4.559583000 | -2.223646000 |
| 1  | -1.655399000 | -4.781100000 | -2.885363000 |

**PC<sub>1b-i</sub>**

E = -4543.986825      ZPVE = 0.492955      NIMAG = 0.

|   |           |           |           |
|---|-----------|-----------|-----------|
| 6 | -2.98512  | -0.089522 | 0.553374  |
| 6 | -1.951238 | 1.071612  | 0.416604  |
| 6 | -3.134148 | -0.846339 | -0.780626 |
| 6 | -2.564666 | 1.281252  | -2.094052 |
| 6 | -2.390983 | 2.003432  | -0.746207 |
| 6 | -3.518152 | 0.087175  | -1.939328 |
| 6 | -2.821153 | -1.000975 | 1.801718  |
| 6 | -3.03681  | 2.250452  | -3.184644 |
| 6 | -2.858923 | -0.191939 | 3.111112  |
| 6 | -3.906777 | -2.092683 | 1.864303  |
| 1 | -3.938892 | 0.444443  | 0.712762  |
| 1 | -1.976101 | 1.649725  | 1.345325  |
| 1 | -3.907413 | -1.613817 | -0.687486 |
| 1 | -2.207102 | -1.37625  | -1.029937 |
| 1 | -1.58941  | 0.883516  | -2.406157 |
| 1 | -1.695283 | 2.841621  | -0.859913 |



|    |           |           |           |
|----|-----------|-----------|-----------|
| 1  | -3.35543  | 2.445786  | -0.454365 |
| 1  | -3.544815 | -0.484256 | -2.873882 |
| 1  | -4.537307 | 0.468579  | -1.768892 |
| 1  | -1.852232 | -1.510069 | 1.744538  |
| 1  | -2.335064 | 3.082651  | -3.313086 |
| 1  | -3.126823 | 1.737454  | -4.148061 |
| 1  | -4.018551 | 2.674657  | -2.937373 |
| 1  | -3.809818 | 0.3488    | 3.204225  |
| 1  | -2.771558 | -0.85739  | 3.976504  |
| 1  | -2.047736 | 0.536499  | 3.18626   |
| 1  | -4.911986 | -1.653931 | 1.817959  |
| 1  | -3.832232 | -2.644988 | 2.807412  |
| 1  | -3.820409 | -2.81972  | 1.052819  |
| 15 | -0.118383 | 0.6416    | 0.150309  |
| 6  | 0.740429  | 2.26822   | 0.356788  |
| 6  | 2.010277  | 2.408835  | -0.229207 |
| 6  | 0.203414  | 3.353582  | 1.070373  |
| 6  | 2.72249   | 3.603352  | -0.099828 |
| 1  | 2.462578  | 1.578314  | -0.763596 |
| 6  | 0.916597  | 4.548368  | 1.193433  |
| 1  | -0.776125 | 3.286754  | 1.531912  |
| 6  | 2.178925  | 4.676792  | 0.608596  |
| 1  | 3.703708  | 3.688255  | -0.557064 |
| 1  | 0.482802  | 5.376807  | 1.746182  |
| 1  | 2.731899  | 5.606825  | 0.702942  |
| 17 | -0.434627 | -1.890772 | -3.242208 |
| 6  | 1.391762  | -2.447653 | 2.448419  |
| 6  | 0.8256    | -1.695276 | 1.419415  |
| 6  | 0.517112  | -0.329458 | 1.596418  |
| 6  | 0.822257  | 0.254163  | 2.832558  |

|    |          |           |           |
|----|----------|-----------|-----------|
| 6  | 1.380866 | -0.488346 | 3.87404   |
| 6  | 1.663294 | -1.838922 | 3.676599  |
| 1  | 1.638991 | -3.491619 | 2.305244  |
| 1  | 1.604263 | -0.011359 | 4.822914  |
| 1  | 2.108137 | -2.428932 | 4.472076  |
| 12 | 0.877059 | -1.069064 | -1.594564 |
| 35 | 3.280313 | -0.928217 | -1.484671 |
| 1  | 0.633226 | 1.313139  | 2.976952  |
| 8  | 0.525384 | -2.2508   | 0.178262  |
| 6  | 0.771726 | -3.660197 | -0.039465 |
| 1  | 0.402304 | -3.864088 | -1.045031 |
| 1  | 1.842543 | -3.870328 | 0.024071  |
| 1  | 0.208847 | -4.250778 | 0.68746   |

**P<sub>1b-i</sub>**

E = -1311.761951    ZPVE = 0.487694    NIMAG = 0.

|   |           |          |           |
|---|-----------|----------|-----------|
| 6 | 1.233504  | 1.890763 | -0.815051 |
| 6 | -0.191713 | 1.257734 | -0.752752 |
| 6 | 1.526605  | 2.659718 | 0.49151   |
| 6 | -0.959419 | 3.24318  | 0.73198   |
| 6 | -1.215458 | 2.406206 | -0.536033 |
| 6 | 0.486594  | 3.763774 | 0.744235  |
| 6 | 2.38372   | 0.955641 | -1.280471 |
| 6 | -1.975138 | 4.38587  | 0.856009  |
| 6 | 2.063246  | 0.271858 | -2.621843 |
| 6 | 3.716388  | 1.717482 | -1.421088 |
| 1 | 1.150269  | 2.654287 | -1.609964 |
| 1 | -0.401463 | 0.796492 | -1.723342 |

|    |           |           |           |
|----|-----------|-----------|-----------|
| 1  | 2.517169  | 3.121869  | 0.444948  |
| 1  | 1.545033  | 1.957642  | 1.335056  |
| 1  | -1.084601 | 2.584362  | 1.602465  |
| 1  | -2.239048 | 2.017501  | -0.516027 |
| 1  | -1.157877 | 3.070685  | -1.412352 |
| 1  | 0.693524  | 4.2626    | 1.700377  |
| 1  | 0.591072  | 4.53442   | -0.035769 |
| 1  | 2.530544  | 0.176057  | -0.526049 |
| 1  | -3.002566 | 4.005127  | 0.887941  |
| 1  | -1.80578  | 4.968696  | 1.768961  |
| 1  | -1.899963 | 5.073776  | 0.003793  |
| 1  | 1.858174  | 1.018674  | -3.400677 |
| 1  | 2.914712  | -0.329931 | -2.958126 |
| 1  | 1.203179  | -0.398213 | -2.557158 |
| 1  | 3.611538  | 2.573306  | -2.101263 |
| 1  | 4.4871    | 1.059314  | -1.837555 |
| 1  | 4.092502  | 2.093323  | -0.465674 |
| 15 | -0.500998 | -0.051716 | 0.611742  |
| 6  | -2.205118 | -0.655856 | 0.154664  |
| 6  | -2.95016  | -1.226293 | 1.201982  |
| 6  | -2.805261 | -0.585305 | -1.114393 |
| 6  | -4.23739  | -1.726175 | 0.989303  |
| 1  | -2.514257 | -1.274648 | 2.19683   |
| 6  | -4.097792 | -1.072329 | -1.329534 |
| 1  | -2.270337 | -0.146053 | -1.951029 |
| 6  | -4.81748  | -1.64839  | -0.279315 |
| 1  | -4.789063 | -2.165175 | 1.816025  |
| 1  | -4.5402   | -1.002863 | -2.319785 |
| 1  | -5.821683 | -2.026995 | -0.447453 |
| 6  | 2.402777  | -3.018726 | 0.640843  |

|   |           |           |           |
|---|-----------|-----------|-----------|
| 6 | 1.67636   | -1.843337 | 0.873189  |
| 6 | 0.499185  | -1.557963 | 0.138841  |
| 6 | 0.093506  | -2.495458 | -0.820048 |
| 6 | 0.814553  | -3.668101 | -1.065576 |
| 6 | 1.969302  | -3.92611  | -0.330014 |
| 1 | 3.301946  | -3.233531 | 1.205811  |
| 1 | 0.469237  | -4.371212 | -1.817425 |
| 1 | 2.540088  | -4.834381 | -0.501531 |
| 1 | -0.818606 | -2.316454 | -1.379575 |
| 8 | 2.057185  | -0.903818 | 1.791891  |
| 6 | 3.175579  | -1.165493 | 2.629791  |
| 1 | 3.247746  | -0.308979 | 3.30139   |
| 1 | 3.027939  | -2.078897 | 3.219273  |
| 1 | 4.102851  | -1.250663 | 2.049252  |

**R1<sub>II</sub> + b** SN2@P-b pathway

**RC<sub>III-i</sub>**

E = -4235.421442      ZPVE = 0.370813      NIMAG = 0.

|    |           |           |           |
|----|-----------|-----------|-----------|
| 15 | -1.514504 | -0.415323 | -0.176374 |
| 17 | -2.721924 | 0.593811  | -1.566678 |
| 6  | -2.631727 | -0.475283 | 1.370137  |
| 6  | -1.767967 | -1.026321 | 2.529122  |
| 1  | -2.350985 | -0.961813 | 3.455456  |
| 1  | -1.485703 | -2.072186 | 2.390955  |
| 1  | -0.852625 | -0.444269 | 2.680426  |
| 6  | -3.914723 | -1.30709  | 1.218706  |
| 1  | -4.547655 | -1.145421 | 2.100015  |
| 1  | -4.491799 | -1.010807 | 0.33795   |
| 1  | -3.707681 | -2.378714 | 1.159086  |

|    |           |           |           |
|----|-----------|-----------|-----------|
| 6  | -3.004522 | 0.990832  | 1.694679  |
| 1  | -3.492459 | 1.014191  | 2.676339  |
| 1  | -2.13195  | 1.650334  | 1.735496  |
| 1  | -3.699542 | 1.405033  | 0.960768  |
| 12 | 0.797561  | 0.953368  | 0.34684   |
| 35 | 0.053205  | 3.229734  | 0.195762  |
| 6  | 2.298985  | -0.394373 | 1.009024  |
| 6  | 2.997566  | -0.315149 | -0.201714 |
| 6  | 2.896855  | -1.2      | 1.98743   |
| 6  | 4.206724  | -0.943598 | -0.486008 |
| 6  | 4.110711  | -1.868268 | 1.757574  |
| 1  | 2.42386   | -1.310089 | 2.962328  |
| 6  | 4.762241  | -1.736177 | 0.529047  |
| 1  | 4.710861  | -0.840277 | -1.441966 |
| 1  | 4.552989  | -2.481327 | 2.538712  |
| 1  | 5.705378  | -2.245399 | 0.352086  |
| 8  | 2.295238  | 0.490707  | -1.143387 |
| 6  | 2.995612  | 1.09717   | -2.234235 |
| 1  | 2.296827  | 1.79483   | -2.696769 |
| 1  | 3.872885  | 1.640175  | -1.867085 |
| 1  | 3.302003  | 0.340504  | -2.963976 |
| 6  | -1.283685 | -2.099242 | -1.049008 |
| 6  | -2.56799  | -2.763165 | -1.574031 |
| 1  | -2.28854  | -3.653864 | -2.150302 |
| 1  | -3.231221 | -3.088017 | -0.770723 |
| 1  | -3.128273 | -2.100808 | -2.238888 |
| 6  | -0.351838 | -1.791885 | -2.24597  |
| 1  | 0.595406  | -1.346191 | -1.928969 |
| 1  | -0.121345 | -2.732135 | -2.761417 |
| 1  | -0.82634  | -1.123872 | -2.970592 |

|   |           |           |           |
|---|-----------|-----------|-----------|
| 6 | -0.550326 | -3.045853 | -0.073888 |
| 1 | 0.333259  | -2.5826   | 0.377137  |
| 1 | -1.207646 | -3.402634 | 0.723769  |
| 1 | -0.209724 | -3.925931 | -0.632532 |

**TS<sub>nb-i</sub>**

E = -4235.369831    ZPVE = 0.371658    NIMAG = 1.

|    |           |           |           |
|----|-----------|-----------|-----------|
| 15 | 1.248303  | -0.233166 | -0.144713 |
| 17 | 2.077345  | -2.108194 | -1.511383 |
| 6  | 2.018903  | -0.870428 | 1.519004  |
| 6  | 1.755553  | 0.06102   | 2.714698  |
| 1  | 2.230221  | -0.379964 | 3.600214  |
| 1  | 2.184192  | 1.056381  | 2.575866  |
| 1  | 0.689753  | 0.159157  | 2.926816  |
| 6  | 3.537586  | -1.104613 | 1.405312  |
| 1  | 3.870384  | -1.618991 | 2.315573  |
| 1  | 3.797082  | -1.729442 | 0.549009  |
| 1  | 4.09166   | -0.163511 | 1.346025  |
| 6  | 1.313661  | -2.217439 | 1.796661  |
| 1  | 1.696404  | -2.627516 | 2.739414  |
| 1  | 0.230086  | -2.10005  | 1.925958  |
| 1  | 1.497564  | -2.946775 | 1.00573   |
| 12 | -1.05286  | -0.901938 | -0.378602 |
| 35 | -2.806702 | -2.337917 | 0.26947   |
| 6  | -0.508494 | 1.413996  | 0.604006  |
| 6  | -1.566352 | 1.673544  | -0.286671 |
| 6  | -0.460087 | 2.296279  | 1.699175  |
| 6  | -2.503037 | 2.69871   | -0.142622 |

|   |           |           |           |
|---|-----------|-----------|-----------|
| 6 | -1.363275 | 3.350588  | 1.879241  |
| 1 | 0.322933  | 2.188555  | 2.440757  |
| 6 | -2.386843 | 3.553623  | 0.95498   |
| 1 | -3.309211 | 2.841911  | -0.852853 |
| 1 | -1.265929 | 4.006301  | 2.740103  |
| 1 | -3.098889 | 4.363377  | 1.082133  |
| 8 | -1.672977 | 0.752682  | -1.37515  |
| 6 | -2.717917 | 0.901059  | -2.351264 |
| 1 | -2.558587 | 0.110463  | -3.084936 |
| 1 | -3.701258 | 0.784374  | -1.887152 |
| 1 | -2.632519 | 1.875644  | -2.838688 |
| 6 | 2.288383  | 1.161268  | -1.01499  |
| 6 | 3.640736  | 0.646893  | -1.556273 |
| 1 | 4.14399   | 1.500516  | -2.027349 |
| 1 | 4.296703  | 0.270109  | -0.771099 |
| 1 | 3.517891  | -0.137826 | -2.301074 |
| 6 | 1.447744  | 1.636211  | -2.217476 |
| 1 | 0.513269  | 2.107335  | -1.908554 |
| 1 | 2.028734  | 2.379598  | -2.776951 |
| 1 | 1.22587   | 0.808431  | -2.898202 |
| 6 | 2.576368  | 2.342927  | -0.067924 |
| 1 | 1.668232  | 2.808268  | 0.31321   |
| 1 | 3.202698  | 2.045592  | 0.778349  |
| 1 | 3.13446   | 3.101919  | -0.630268 |

**PC<sub>nb-i</sub>**

E = -4235.495754    ZPVE = 0.373819    NIMAG = 0.

|    |          |           |         |
|----|----------|-----------|---------|
| 15 | 0.935835 | -0.567454 | 0.06969 |
|----|----------|-----------|---------|

|    |           |           |           |
|----|-----------|-----------|-----------|
| 17 | -2.110607 | -1.892075 | -2.347634 |
| 6  | 1.378403  | -1.12073  | 1.85381   |
| 6  | 2.876366  | -1.302686 | 2.159468  |
| 1  | 2.984167  | -1.590807 | 3.212513  |
| 1  | 3.33172   | -2.094488 | 1.55897   |
| 1  | 3.45335   | -0.385031 | 2.015414  |
| 6  | 0.651191  | -2.47247  | 2.059121  |
| 1  | 0.856822  | -2.838166 | 3.072427  |
| 1  | -0.433282 | -2.361239 | 1.963307  |
| 1  | 0.985     | -3.242342 | 1.357639  |
| 6  | 0.772346  | -0.094937 | 2.836471  |
| 1  | 0.84488   | -0.504978 | 3.851273  |
| 1  | 1.306192  | 0.858361  | 2.822584  |
| 1  | -0.285395 | 0.09666   | 2.633781  |
| 12 | -1.594362 | -0.690985 | -0.493933 |
| 35 | -2.941377 | -0.114598 | 1.424213  |
| 6  | 1.078846  | 1.274592  | -0.012801 |
| 6  | 0.018898  | 2.009433  | -0.593762 |
| 6  | 2.159806  | 2.002892  | 0.506947  |
| 6  | 0.037723  | 3.406152  | -0.619725 |
| 6  | 2.199546  | 3.397397  | 0.469649  |
| 1  | 2.988882  | 1.468602  | 0.956782  |
| 6  | 1.13124   | 4.09485   | -0.09137  |
| 1  | -0.784404 | 3.965197  | -1.047359 |
| 1  | 3.051454  | 3.929048  | 0.881242  |
| 1  | 1.137522  | 5.180133  | -0.119952 |
| 8  | -1.031413 | 1.289901  | -1.14698  |
| 6  | -2.123989 | 1.997672  | -1.775638 |
| 1  | -2.767094 | 1.224904  | -2.197834 |
| 1  | -2.672332 | 2.58331   | -1.033716 |



|   |           |           |           |
|---|-----------|-----------|-----------|
| 1 | -1.744326 | 2.630555  | -2.581453 |
| 6 | 2.136856  | -1.21356  | -1.274727 |
| 6 | 2.09643   | -2.755815 | -1.262107 |
| 1 | 2.675916  | -3.132515 | -2.113593 |
| 1 | 2.539731  | -3.177818 | -0.355399 |
| 1 | 1.075638  | -3.13669  | -1.365916 |
| 6 | 1.566939  | -0.713812 | -2.622223 |
| 1 | 1.56903   | 0.379234  | -2.684041 |
| 1 | 2.20545   | -1.088905 | -3.431514 |
| 1 | 0.551467  | -1.076358 | -2.803997 |
| 6 | 3.587973  | -0.715668 | -1.144049 |
| 1 | 3.647772  | 0.375682  | -1.183427 |
| 1 | 4.077315  | -1.058562 | -0.230809 |
| 1 | 4.167704  | -1.103002 | -1.991279 |

**P11b-i**

E = -1003.265709      ZPVE = 0.368314      NIMAG = 0.

|    |          |           |           |
|----|----------|-----------|-----------|
| 15 | 0.72486  | 0.296371  | -0.594634 |
| 6  | 1.877597 | -1.254702 | -0.719027 |
| 6  | 2.595759 | -1.775398 | 0.540281  |
| 1  | 3.205986 | -2.649179 | 0.272409  |
| 1  | 3.272432 | -1.029983 | 0.967167  |
| 1  | 1.905612 | -2.096483 | 1.324244  |
| 6  | 2.953678 | -0.868419 | -1.763506 |
| 1  | 3.590238 | -1.738282 | -1.973684 |
| 1  | 2.497558 | -0.545804 | -2.704516 |
| 1  | 3.604352 | -0.062131 | -1.413519 |
| 6  | 1.025981 | -2.389477 | -1.328909 |

|   |           |           |           |
|---|-----------|-----------|-----------|
| 1 | 1.684088  | -3.212944 | -1.636118 |
| 1 | 0.296067  | -2.788595 | -0.620283 |
| 1 | 0.481466  | -2.05083  | -2.217769 |
| 6 | -0.847893 | -0.327435 | 0.199906  |
| 6 | -2.085754 | 0.108853  | -0.339928 |
| 6 | -0.906487 | -1.223976 | 1.277663  |
| 6 | -3.304031 | -0.352104 | 0.182767  |
| 6 | -2.113582 | -1.691372 | 1.80559   |
| 1 | 0.01683   | -1.573326 | 1.723125  |
| 6 | -3.313498 | -1.250709 | 1.251352  |
| 1 | -4.24519  | -0.016442 | -0.235516 |
| 1 | -2.110543 | -2.387223 | 2.639123  |
| 1 | -4.263767 | -1.599573 | 1.64574   |
| 8 | -2.02234  | 0.994847  | -1.377403 |
| 6 | -3.225164 | 1.437895  | -1.989927 |
| 1 | -2.915365 | 2.107077  | -2.793825 |
| 1 | -3.793212 | 0.599979  | -2.413614 |
| 1 | -3.85914  | 1.988586  | -1.283267 |
| 6 | 1.373253  | 1.527454  | 0.744838  |
| 6 | 2.786394  | 1.991134  | 0.336796  |
| 1 | 3.088023  | 2.840833  | 0.963411  |
| 1 | 3.536138  | 1.205967  | 0.472842  |
| 1 | 2.819496  | 2.319658  | -0.707712 |
| 6 | 0.418322  | 2.739259  | 0.642779  |
| 1 | -0.606967 | 2.47163   | 0.917517  |
| 1 | 0.752439  | 3.527765  | 1.330251  |
| 1 | 0.399547  | 3.154509  | -0.369725 |
| 6 | 1.391023  | 1.046541  | 2.206779  |
| 1 | 0.391884  | 0.770274  | 2.553942  |
| 1 | 2.056049  | 0.193703  | 2.361747  |

1 1.748219 1.861207 2.852053

**R1<sub>III</sub> + b S<sub>N</sub>2@P-b pathway**

**RC<sub>IIIb-i</sub>**

E = -4383.020022 ZPVE = 0.308471 NIMAG = 0.

|    |           |           |           |
|----|-----------|-----------|-----------|
| 6  | -2.509622 | -0.170958 | 0.509293  |
| 6  | -2.921772 | 1.111583  | 0.916869  |
| 6  | -3.217996 | -1.300787 | 0.950072  |
| 6  | -4.036269 | 1.25333   | 1.7445    |
| 1  | -2.381373 | 1.993173  | 0.582214  |
| 6  | -4.332158 | -1.148427 | 1.777033  |
| 1  | -2.903051 | -2.294878 | 0.652096  |
| 6  | -4.744051 | 0.12698   | 2.173375  |
| 1  | -4.349705 | 2.245764  | 2.054152  |
| 1  | -4.875367 | -2.026839 | 2.11307   |
| 1  | -5.609887 | 0.241802  | 2.819023  |
| 17 | -1.721121 | 0.092874  | -2.469119 |
| 15 | -0.99957  | -0.277487 | -0.526229 |
| 12 | 0.943533  | 1.540403  | 0.15372   |
| 35 | -0.240045 | 3.554345  | -0.39678  |
| 6  | 2.410189  | 0.523454  | 1.2869    |
| 6  | 2.931294  | 0.085916  | 2.510231  |
| 6  | 3.200088  | 0.243308  | 0.165388  |
| 6  | 4.153146  | -0.604045 | 2.589246  |
| 1  | 2.382628  | 0.276496  | 3.431192  |
| 6  | 4.419121  | -0.427679 | 0.1796    |
| 6  | 4.889807  | -0.856942 | 1.430503  |
| 1  | 4.533412  | -0.933433 | 3.552772  |
| 1  | 4.997088  | -0.620329 | -0.718596 |

|   |           |           |           |
|---|-----------|-----------|-----------|
| 1 | 5.837814  | -1.384269 | 1.488991  |
| 8 | 2.587621  | 0.74456   | -1.017067 |
| 6 | 3.263068  | 0.655957  | -2.272385 |
| 1 | 2.609935  | 1.125605  | -3.008369 |
| 1 | 4.219122  | 1.188909  | -2.230894 |
| 1 | 3.430991  | -0.391706 | -2.544159 |
| 6 | -0.584753 | -2.065147 | -0.578258 |
| 6 | -1.181373 | -2.985246 | -1.454222 |
| 6 | 0.388405  | -2.507855 | 0.333777  |
| 6 | -0.818651 | -4.33251  | -1.406195 |
| 1 | -1.920565 | -2.650665 | -2.174454 |
| 6 | 0.741061  | -3.858997 | 0.381508  |
| 1 | 0.881853  | -1.802663 | 0.997079  |
| 6 | 0.140897  | -4.771879 | -0.488613 |
| 1 | -1.283709 | -5.037509 | -2.08917  |
| 1 | 1.496066  | -4.189488 | 1.088305  |
| 1 | 0.422986  | -5.820244 | -0.457312 |

**TS<sub>nb-i</sub>**

E = -4382.988880      ZPVE = 0.308352      NIMAG = 1.

|   |           |          |           |
|---|-----------|----------|-----------|
| 6 | -1.55375  | 1.691839 | 0.109174  |
| 6 | -0.775812 | 2.765423 | 0.566483  |
| 6 | -2.946902 | 1.747116 | 0.251432  |
| 6 | -1.378465 | 3.873291 | 1.165576  |
| 1 | 0.30618   | 2.749541 | 0.459685  |
| 6 | -3.547137 | 2.851274 | 0.860025  |
| 1 | -3.564896 | 0.944376 | -0.136007 |
| 6 | -2.766595 | 3.916241 | 1.318066  |

|    |           |           |           |
|----|-----------|-----------|-----------|
| 1  | -0.762622 | 4.699155  | 1.508948  |
| 1  | -4.627892 | 2.883425  | 0.962749  |
| 1  | -3.237167 | 4.777484  | 1.78302   |
| 17 | -1.692801 | 0.919475  | -2.856897 |
| 15 | -0.722664 | 0.319168  | -0.77937  |
| 12 | 1.71019   | 0.258974  | -0.750305 |
| 35 | 3.86087   | 1.198039  | -0.884207 |
| 6  | 0.393761  | -0.310899 | 1.165456  |
| 6  | 0.026332  | 0.119918  | 2.449083  |
| 6  | 1.268534  | -1.408729 | 1.12815   |
| 6  | 0.46934   | -0.527811 | 3.608183  |
| 1  | -0.640572 | 0.971896  | 2.552981  |
| 6  | 1.743706  | -2.079519 | 2.253068  |
| 6  | 1.316782  | -1.632465 | 3.507591  |
| 1  | 0.152252  | -0.17309  | 4.58474   |
| 1  | 2.425056  | -2.919442 | 2.17846   |
| 1  | 1.663286  | -2.143452 | 4.40084   |
| 8  | 1.702173  | -1.732771 | -0.186777 |
| 6  | 2.635613  | -2.805924 | -0.391987 |
| 1  | 2.79792   | -2.86133  | -1.468372 |
| 1  | 3.581537  | -2.599534 | 0.11705   |
| 1  | 2.200978  | -3.743805 | -0.03685  |
| 6  | -1.696596 | -1.245642 | -0.638643 |
| 6  | -1.704094 | -2.124158 | -1.732781 |
| 6  | -2.389882 | -1.602975 | 0.527163  |
| 6  | -2.383051 | -3.342105 | -1.656545 |
| 1  | -1.206835 | -1.842087 | -2.654492 |
| 6  | -3.086576 | -2.811469 | 0.592609  |
| 1  | -2.383667 | -0.946429 | 1.389694  |
| 6  | -3.080268 | -3.687262 | -0.496147 |

|   |           |           |           |
|---|-----------|-----------|-----------|
| 1 | -2.37932  | -4.011329 | -2.511986 |
| 1 | -3.628048 | -3.068505 | 1.498468  |
| 1 | -3.618381 | -4.629231 | -0.44176  |

**PC<sub>IIIb-i</sub>**

E = -4383.098363    ZPVE = 0.310816    NIMAG = 0.

|    |           |           |           |
|----|-----------|-----------|-----------|
| 6  | -1.344497 | 1.738599  | -0.463719 |
| 6  | -0.465408 | 2.783598  | -0.801384 |
| 6  | -2.72151  | 1.993375  | -0.378016 |
| 6  | -0.963972 | 4.068144  | -1.023096 |
| 1  | 0.602125  | 2.594328  | -0.883185 |
| 6  | -3.213709 | 3.280669  | -0.610999 |
| 1  | -3.412251 | 1.190854  | -0.139707 |
| 6  | -2.336006 | 4.320171  | -0.927623 |
| 1  | -0.277296 | 4.869633  | -1.278459 |
| 1  | -4.28173  | 3.467399  | -0.545806 |
| 1  | -2.719406 | 5.320179  | -1.108733 |
| 17 | 1.575732  | -2.471226 | -2.60691  |
| 15 | -0.620942 | 0.070403  | -0.205849 |
| 12 | 1.661648  | -0.707285 | -1.199625 |
| 35 | 3.097531  | 1.198242  | -0.875433 |
| 6  | 0.005748  | 0.083077  | 1.528673  |
| 6  | -0.486294 | 0.92423   | 2.533291  |
| 6  | 1.084561  | -0.769207 | 1.841692  |
| 6  | 0.049616  | 0.899015  | 3.823293  |
| 1  | -1.292422 | 1.612609  | 2.298202  |
| 6  | 1.627847  | -0.805437 | 3.124472  |
| 6  | 1.099415  | 0.028968  | 4.114318  |

|   |           |           |           |
|---|-----------|-----------|-----------|
| 1 | -0.347824 | 1.556744  | 4.589623  |
| 1 | 2.460477  | -1.456399 | 3.359996  |
| 1 | 1.52783   | 0.002423  | 5.111554  |
| 8 | 1.570793  | -1.556018 | 0.802543  |
| 6 | 2.481976  | -2.637106 | 1.101265  |
| 1 | 2.614926  | -3.168834 | 0.158748  |
| 1 | 3.439342  | -2.245551 | 1.455878  |
| 1 | 2.032904  | -3.299633 | 1.845673  |
| 6 | -2.016246 | -1.125111 | -0.212607 |
| 6 | -2.264465 | -1.818786 | -1.408691 |
| 6 | -2.821436 | -1.379798 | 0.909309  |
| 6 | -3.318125 | -2.73218  | -1.487386 |
| 1 | -1.623173 | -1.664273 | -2.271651 |
| 6 | -3.869844 | -2.298905 | 0.828561  |
| 1 | -2.62681  | -0.870388 | 1.848082  |
| 6 | -4.12257  | -2.97211  | -0.370664 |
| 1 | -3.497644 | -3.265235 | -2.416103 |
| 1 | -4.485845 | -2.490621 | 1.702454  |
| 1 | -4.936713 | -3.688558 | -0.430182 |

**R<sub>int</sub>-i**

E = -1150.877424    ZPVE = 0.305833    NIMAG = 0.

|   |          |           |           |
|---|----------|-----------|-----------|
| 6 | 1.911533 | -0.457264 | -0.485859 |
| 6 | 2.593018 | -1.405175 | -1.26943  |
| 6 | 2.572948 | 0.091102  | 0.624794  |
| 6 | 3.888033 | -1.812603 | -0.940351 |
| 1 | 2.105187 | -1.823742 | -2.14649  |
| 6 | 3.874044 | -0.305261 | 0.947927  |

|    |           |           |           |
|----|-----------|-----------|-----------|
| 1  | 2.074097  | 0.834356  | 1.238709  |
| 6  | 4.533537  | -1.26072  | 0.169906  |
| 1  | 4.395312  | -2.549865 | -1.556444 |
| 1  | 4.371204  | 0.13314   | 1.809026  |
| 1  | 5.544623  | -1.56743  | 0.422433  |
| 15 | 0.203951  | 0.017404  | -1.044333 |
| 6  | -0.853066 | -1.136607 | -0.046948 |
| 6  | -0.352853 | -2.112957 | 0.822248  |
| 6  | -2.251667 | -1.0958   | -0.262598 |
| 6  | -1.197939 | -3.025465 | 1.465075  |
| 1  | 0.71608   | -2.165083 | 1.000118  |
| 6  | -3.105071 | -2.001139 | 0.377718  |
| 6  | -2.571275 | -2.965163 | 1.240318  |
| 1  | -0.780647 | -3.771758 | 2.134149  |
| 1  | -4.175399 | -1.965038 | 0.212731  |
| 1  | -3.23987  | -3.665787 | 1.732425  |
| 8  | -2.683212 | -0.120189 | -1.115493 |
| 6  | -4.069443 | -0.019812 | -1.414099 |
| 1  | -4.160567 | 0.807934  | -2.118284 |
| 1  | -4.445039 | -0.939132 | -1.880443 |
| 1  | -4.656206 | 0.201759  | -0.513936 |
| 6  | -0.04836  | 1.6435    | -0.18589  |
| 6  | 0.334459  | 2.800523  | -0.885196 |
| 6  | -0.609479 | 1.788389  | 1.092314  |
| 6  | 0.181064  | 4.066714  | -0.315749 |
| 1  | 0.752707  | 2.708646  | -1.884681 |
| 6  | -0.77561  | 3.05561   | 1.658943  |
| 1  | -0.920832 | 0.90876   | 1.647843  |
| 6  | -0.377523 | 4.197809  | 0.958984  |
| 1  | 0.487433  | 4.949054  | -0.870856 |



|   |           |          |          |
|---|-----------|----------|----------|
| 1 | -1.213882 | 3.148666 | 2.649059 |
| 1 | -0.505865 | 5.181867 | 1.400943 |

**R1<sub>IV</sub> + b S<sub>N2</sub>@P-b pathway**

**RC<sub>IVb-i</sub>**

E = -4191.277044    ZPVE = 0.255200    NIMAG = 0.

|    |           |           |           |
|----|-----------|-----------|-----------|
| 17 | 0.620879  | -1.799958 | 1.935766  |
| 15 | 0.855694  | -1.025584 | -0.020009 |
| 12 | -0.926762 | 1.080242  | -0.35379  |
| 35 | 0.406171  | 3.057538  | -0.11047  |
| 6  | 0.426373  | -2.521874 | -1.00628  |
| 1  | 0.998125  | -3.4017   | -0.703042 |
| 1  | -0.641607 | -2.719059 | -0.888573 |
| 1  | 0.625901  | -2.300332 | -2.060137 |
| 6  | 2.668061  | -0.864201 | -0.191858 |
| 6  | 3.187535  | 0.438233  | -0.281719 |
| 6  | 3.541926  | -1.965052 | -0.238033 |
| 6  | 4.564209  | 0.632625  | -0.424894 |
| 1  | 2.522439  | 1.295984  | -0.230855 |
| 6  | 4.913207  | -1.763845 | -0.382985 |
| 1  | 3.15962   | -2.97725  | -0.149381 |
| 6  | 5.425312  | -0.464051 | -0.479463 |
| 1  | 4.95742   | 1.642276  | -0.493389 |
| 1  | 5.583353  | -2.617739 | -0.41755  |
| 1  | 6.494776  | -0.31098  | -0.591834 |
| 6  | -2.590139 | -0.002038 | -1.082445 |
| 6  | -3.126515 | -0.173164 | 0.200064  |
| 6  | -3.336291 | -0.570514 | -2.12143  |
| 6  | -4.301868 | -0.853161 | 0.504225  |

|   |           |           |           |
|---|-----------|-----------|-----------|
| 6 | -4.52791  | -1.274658 | -1.877974 |
| 1 | -2.993993 | -0.472521 | -3.150501 |
| 6 | -5.004639 | -1.414238 | -0.573319 |
| 1 | -4.677146 | -0.957426 | 1.517143  |
| 1 | -5.085043 | -1.707542 | -2.704805 |
| 1 | -5.927503 | -1.954637 | -0.382514 |
| 8 | -2.302959 | 0.454235  | 1.176284  |
| 6 | -2.654449 | 0.404467  | 2.559561  |
| 1 | -2.685451 | -0.632704 | 2.909114  |
| 1 | -1.876979 | 0.948902  | 3.095714  |
| 1 | -3.624339 | 0.886013  | 2.723699  |

**TS<sub>IVb-i</sub>**

E = -4191.248568    ZPVE = 0.254950    NIMAG = 1.

|    |           |           |           |
|----|-----------|-----------|-----------|
| 17 | -1.905462 | -2.129951 | 2.281334  |
| 15 | -0.910507 | -0.349693 | 1.065628  |
| 12 | 1.282637  | -0.8315   | 0.137929  |
| 35 | 2.784057  | -2.04537  | -1.204349 |
| 6  | -1.168364 | 0.85142   | 2.455235  |
| 1  | -1.932432 | 0.455899  | 3.124349  |
| 1  | -0.227658 | 0.933385  | 3.005504  |
| 1  | -1.445417 | 1.836852  | 2.078393  |
| 6  | -2.301331 | -0.208572 | -0.117055 |
| 6  | -2.172865 | -0.806139 | -1.37905  |
| 6  | -3.501345 | 0.433954  | 0.21514   |
| 6  | -3.222349 | -0.75608  | -2.297929 |
| 1  | -1.257207 | -1.325584 | -1.652825 |
| 6  | -4.55174  | 0.483419  | -0.704523 |

|   |           |           |           |
|---|-----------|-----------|-----------|
| 1 | -3.630788 | 0.882139  | 1.194805  |
| 6 | -4.415123 | -0.109723 | -1.96222  |
| 1 | -3.108663 | -1.22627  | -3.270113 |
| 1 | -5.478814 | 0.980148  | -0.433528 |
| 1 | -5.23483  | -0.074802 | -2.673664 |
| 6 | 0.220821  | 1.348392  | 0.001999  |
| 6 | 1.507603  | 1.71854   | 0.422541  |
| 6 | -0.422056 | 2.265632  | -0.843423 |
| 6 | 2.14167   | 2.910027  | 0.074061  |
| 6 | 0.168696  | 3.480019  | -1.211515 |
| 1 | -1.418611 | 2.037582  | -1.212684 |
| 6 | 1.444344  | 3.80337   | -0.745446 |
| 1 | 3.1421    | 3.152921  | 0.41389   |
| 1 | -0.36447  | 4.170648  | -1.858561 |
| 1 | 1.910494  | 4.743338  | -1.025026 |
| 8 | 2.155836  | 0.715543  | 1.200963  |
| 6 | 3.517167  | 0.905912  | 1.626334  |
| 1 | 3.581454  | 1.783814  | 2.274315  |
| 1 | 3.784201  | 0.011931  | 2.189525  |
| 1 | 4.17998   | 1.013155  | 0.763003  |

**PC<sub>IVb-i</sub>**

E = -4191.353844      ZPVE = 0.257403      NIMAG = 0.

|    |           |           |           |
|----|-----------|-----------|-----------|
| 17 | 2.704003  | -2.010298 | 2.184811  |
| 15 | -0.644844 | 0.036718  | 1.100342  |
| 12 | 1.556121  | -1.178434 | 0.427437  |
| 35 | 1.326782  | -1.62907  | -1.928255 |
| 6  | -0.883613 | 0.540629  | 2.861981  |

|   |           |           |           |
|---|-----------|-----------|-----------|
| 1 | -1.23153  | -0.318976 | 3.441394  |
| 1 | 0.089325  | 0.843731  | 3.257245  |
| 1 | -1.584932 | 1.372298  | 2.969939  |
| 6 | -2.301747 | -0.422497 | 0.463955  |
| 6 | -2.361841 | -1.121765 | -0.755196 |
| 6 | -3.491763 | -0.138386 | 1.152392  |
| 6 | -3.596684 | -1.501604 | -1.282898 |
| 1 | -1.44674  | -1.361703 | -1.291084 |
| 6 | -4.724374 | -0.531826 | 0.623794  |
| 1 | -3.470265 | 0.386481  | 2.102154  |
| 6 | -4.778872 | -1.209746 | -0.59617  |
| 1 | -3.63093  | -2.03688  | -2.227005 |
| 1 | -5.638194 | -0.308679 | 1.166828  |
| 1 | -5.736928 | -1.514994 | -1.006707 |
| 6 | -0.219981 | 1.618123  | 0.245057  |
| 6 | 1.134011  | 1.883055  | -0.045072 |
| 6 | -1.180254 | 2.547374  | -0.172068 |
| 6 | 1.511747  | 3.042533  | -0.722746 |
| 6 | -0.815183 | 3.715818  | -0.843776 |
| 1 | -2.229632 | 2.344488  | 0.019962  |
| 6 | 0.530733  | 3.956992  | -1.116468 |
| 1 | 2.550102  | 3.238892  | -0.957824 |
| 1 | -1.575867 | 4.422762  | -1.158946 |
| 1 | 0.829711  | 4.856595  | -1.645671 |
| 8 | 2.059409  | 0.937989  | 0.384619  |
| 6 | 3.470155  | 1.214751  | 0.23861   |
| 1 | 3.716885  | 2.154943  | 0.738184  |
| 1 | 3.979368  | 0.389912  | 0.738185  |
| 1 | 3.744154  | 1.24949   | -0.819222 |

Pivb-i

E = -959.133098      ZPVE = 0.252524      NIMAG = 0.

|    |           |           |           |
|----|-----------|-----------|-----------|
| 15 | -0.156963 | -1.203751 | -0.382265 |
| 6  | 0.064834  | -2.165977 | 1.203448  |
| 1  | -0.673995 | -2.972669 | 1.233588  |
| 1  | 1.063136  | -2.608578 | 1.184879  |
| 1  | -0.028094 | -1.555431 | 2.106576  |
| 6  | 0.929561  | 0.26952   | -0.056099 |
| 6  | 2.331421  | 0.080572  | -0.088334 |
| 6  | 0.453324  | 1.574683  | 0.115973  |
| 6  | 3.209867  | 1.159455  | 0.055926  |
| 6  | 1.323086  | 2.662575  | 0.257531  |
| 1  | -0.617303 | 1.748988  | 0.135766  |
| 6  | 2.699163  | 2.450822  | 0.228802  |
| 1  | 4.282589  | 1.007742  | 0.035216  |
| 1  | 0.921749  | 3.662791  | 0.389625  |
| 1  | 3.386971  | 3.284346  | 0.338779  |
| 8  | 2.74687   | -1.213958 | -0.262934 |
| 6  | 4.135307  | -1.480725 | -0.412295 |
| 1  | 4.693308  | -1.221349 | 0.496205  |
| 1  | 4.213913  | -2.553986 | -0.590748 |
| 1  | 4.555547  | -0.937454 | -1.267611 |
| 6  | -1.85314  | -0.48085  | -0.165688 |
| 6  | -2.570328 | -0.180855 | -1.336789 |
| 6  | -2.479559 | -0.254819 | 1.071542  |
| 6  | -3.863987 | 0.344489  | -1.277155 |
| 1  | -2.109782 | -0.366816 | -2.303952 |
| 6  | -3.777985 | 0.258258  | 1.13558   |

|   |           |           |           |
|---|-----------|-----------|-----------|
| 1 | -1.956341 | -0.474553 | 1.996971  |
| 6 | -4.472776 | 0.562591  | -0.038636 |
| 1 | -4.397833 | 0.572062  | -2.195642 |
| 1 | -4.245212 | 0.422738  | 2.102821  |
| 1 | -5.481888 | 0.961648  | 0.012133  |

**R1<sub>v</sub> + b S<sub>N2</sub>@P-b pathway**

**RC<sub>v<sub>b</sub>-i</sub>**

E = -3999.532798      ZPVE = 0.201327      NIMAG = 0.

|    |           |           |           |
|----|-----------|-----------|-----------|
| 17 | -0.923657 | 2.79407   | 1.102911  |
| 15 | -1.433425 | 1.449822  | -0.431891 |
| 12 | -0.142915 | -0.962961 | -0.236076 |
| 35 | -2.161606 | -2.245668 | -0.040007 |
| 6  | -3.269955 | 1.469628  | -0.338167 |
| 1  | -3.589413 | 1.013231  | 0.601221  |
| 1  | -3.668973 | 2.484452  | -0.418286 |
| 1  | -3.652248 | 0.850078  | -1.156374 |
| 6  | -1.091908 | 2.463428  | -1.93213  |
| 1  | -1.603312 | 3.429271  | -1.898804 |
| 1  | -0.014215 | 2.617191  | -2.026048 |
| 1  | -1.437301 | 1.897731  | -2.805124 |
| 6  | 1.838499  | -0.613968 | -0.868088 |
| 6  | 2.28245   | -0.343066 | 0.431552  |
| 6  | 2.815687  | -0.516982 | -1.865307 |
| 6  | 3.578184  | 0.017697  | 0.787644  |
| 6  | 4.140819  | -0.154964 | -1.569994 |
| 1  | 2.553994  | -0.723231 | -2.901924 |
| 6  | 4.516067  | 0.111969  | -0.252211 |
| 1  | 3.874309  | 0.219843  | 1.811906  |

|   |          |           |           |
|---|----------|-----------|-----------|
| 1 | 4.878252 | -0.085359 | -2.365403 |
| 1 | 5.540164 | 0.390546  | -0.020353 |
| 8 | 1.218968 | -0.491775 | 1.368151  |
| 6 | 1.440311 | -0.227036 | 2.753779  |
| 1 | 1.760735 | 0.810063  | 2.898456  |
| 1 | 0.487065 | -0.390057 | 3.257345  |
| 1 | 2.193025 | -0.912396 | 3.157745  |

**TS<sub>vb-i</sub>**

E = -3999.505169      ZPVE = 0.201791      NIMAG = 1.

|    |           |           |           |
|----|-----------|-----------|-----------|
| 17 | -3.212673 | -2.261091 | 0.516373  |
| 15 | -1.850027 | -0.398319 | -0.045121 |
| 12 | 0.540716  | -0.84937  | -0.061077 |
| 35 | 2.505106  | -2.024036 | -0.59964  |
| 6  | -2.730172 | -0.03733  | -1.63273  |
| 1  | -2.022184 | -0.062054 | -2.464955 |
| 1  | -3.489519 | -0.804316 | -1.780791 |
| 1  | -3.206126 | 0.946024  | -1.597101 |
| 6  | -2.663438 | 0.631579  | 1.268337  |
| 1  | -3.727301 | 0.389181  | 1.267858  |
| 1  | -2.252345 | 0.352436  | 2.241136  |
| 1  | -2.510931 | 1.696479  | 1.091478  |
| 6  | -0.398095 | 1.359666  | -0.417695 |
| 6  | 0.576999  | 1.659734  | 0.548833  |
| 6  | -0.626919 | 2.3719    | -1.363726 |
| 6  | 1.271234  | 2.865859  | 0.627841  |
| 6  | 0.03941   | 3.60261   | -1.322985 |
| 1  | -1.357256 | 2.215332  | -2.153446 |

|   |           |           |           |
|---|-----------|-----------|-----------|
| 6 | 0.979639  | 3.850273  | -0.321765 |
| 1 | 2.020587  | 3.050872  | 1.389049  |
| 1 | -0.174178 | 4.36296   | -2.068699 |
| 1 | 1.500417  | 4.802044  | -0.279168 |
| 8 | 0.849965  | 0.571969  | 1.422815  |
| 6 | 1.907481  | 0.67501   | 2.393192  |
| 1 | 1.682657  | 1.476779  | 3.101322  |
| 1 | 1.930785  | -0.281771 | 2.914128  |
| 1 | 2.867408  | 0.851489  | 1.899652  |

**PC<sub>v<sub>b</sub>-i</sub>**

E = -3999.608408      ZPVE = 0.203708      NIMAG = 0.

|    |           |           |           |
|----|-----------|-----------|-----------|
| 17 | -2.86573  | 0.428132  | 2.180147  |
| 15 | 0.451089  | 1.692481  | 0.050147  |
| 12 | -1.572035 | 0.095618  | 0.359846  |
| 35 | -1.843459 | -0.712956 | -1.89317  |
| 6  | 0.674516  | 2.55323   | -1.564935 |
| 1  | 0.433279  | 1.85308   | -2.368497 |
| 1  | -0.034172 | 3.385709  | -1.612954 |
| 1  | 1.686191  | 2.945382  | -1.703012 |
| 6  | 1.066581  | 2.910313  | 1.29959   |
| 1  | 0.395829  | 3.774692  | 1.309235  |
| 1  | 1.044736  | 2.451337  | 2.291168  |
| 1  | 2.085043  | 3.242464  | 1.076525  |
| 6  | 1.728541  | 0.360051  | 0.053369  |
| 6  | 1.390425  | -0.910737 | 0.564764  |
| 6  | 3.019615  | 0.538182  | -0.460137 |
| 6  | 2.316505  | -1.955105 | 0.569124  |



|   |           |           |           |
|---|-----------|-----------|-----------|
| 6 | 3.957248  | -0.496008 | -0.457784 |
| 1 | 3.301131  | 1.503478  | -0.870715 |
| 6 | 3.599098  | -1.740508 | 0.058799  |
| 1 | 2.052785  | -2.931914 | 0.954087  |
| 1 | 4.952098  | -0.331236 | -0.858754 |
| 1 | 4.313233  | -2.558195 | 0.062777  |
| 8 | 0.109277  | -1.063515 | 1.080301  |
| 6 | -0.221376 | -2.267547 | 1.808373  |
| 1 | 0.4948    | -2.417441 | 2.620205  |
| 1 | -1.214196 | -2.090745 | 2.223153  |
| 1 | -0.235345 | -3.129163 | 1.135489  |

**P<sub>Vb-i</sub>**

E = -767.389453      ZPVE = 0.199123      NIMAG = 0.

|    |           |           |           |
|----|-----------|-----------|-----------|
| 15 | -1.754158 | -0.424508 | -0.494451 |
| 6  | -2.994777 | 0.950737  | -0.277769 |
| 1  | -2.923655 | 1.666515  | -1.102113 |
| 1  | -3.991014 | 0.498764  | -0.322898 |
| 1  | -2.899128 | 1.48535   | 0.674286  |
| 6  | -2.046314 | -1.326702 | 1.117261  |
| 1  | -3.037168 | -1.791728 | 1.083106  |
| 1  | -1.299751 | -2.116073 | 1.226732  |
| 1  | -1.994225 | -0.659192 | 1.984286  |
| 6  | -0.158834 | 0.448007  | -0.127923 |
| 6  | 1.029348  | -0.318937 | -0.065414 |
| 6  | -0.036287 | 1.838271  | -0.012723 |
| 6  | 2.275824  | 0.289126  | 0.115097  |
| 6  | 1.206241  | 2.459674  | 0.163513  |

|   |           |           |           |
|---|-----------|-----------|-----------|
| 1 | -0.923805 | 2.460009  | -0.06369  |
| 6 | 2.358823  | 1.681511  | 0.229048  |
| 1 | 3.180276  | -0.305272 | 0.167544  |
| 1 | 1.264753  | 3.540504  | 0.249318  |
| 1 | 3.330399  | 2.147051  | 0.367405  |
| 8 | 0.860899  | -1.672979 | -0.188551 |
| 6 | 2.007732  | -2.511605 | -0.23753  |
| 1 | 2.573649  | -2.472182 | 0.701753  |
| 1 | 1.629236  | -3.523312 | -0.389381 |
| 1 | 2.665074  | -2.239479 | -1.072536 |

**R1 + b** S<sub>N</sub>2@P-f pathway

**RC<sub>1b-r</sub>**

E = -4543.910143      ZPVE = 0.489618      NIMAG = 0.

|   |           |           |           |
|---|-----------|-----------|-----------|
| 6 | 1.867636  | -2.064269 | -1.139063 |
| 6 | 2.349251  | -0.578051 | -1.119903 |
| 6 | 2.334574  | -2.78208  | 0.14692   |
| 6 | 4.404306  | -1.26893  | 0.292686  |
| 6 | 3.895387  | -0.556301 | -0.97405  |
| 6 | 3.858258  | -2.704783 | 0.33703   |
| 6 | 0.366126  | -2.277048 | -1.482258 |
| 6 | 5.934938  | -1.23382  | 0.372782  |
| 6 | 0.024859  | -1.741123 | -2.884475 |
| 6 | -0.048162 | -3.758002 | -1.398181 |
| 1 | 2.428744  | -2.520187 | -1.973746 |
| 1 | 2.092304  | -0.088433 | -2.065273 |
| 1 | 2.046724  | -3.836034 | 0.107774  |
| 1 | 1.819478  | -2.357127 | 1.018432  |

|    |           |           |           |
|----|-----------|-----------|-----------|
| 1  | 4.012809  | -0.734732 | 1.173477  |
| 1  | 4.275066  | 0.469493  | -1.010472 |
| 1  | 4.309083  | -1.069763 | -1.854817 |
| 1  | 4.138702  | -3.18095  | 1.285073  |
| 1  | 4.348408  | -3.286354 | -0.45923  |
| 1  | -0.238802 | -1.73604  | -0.745283 |
| 1  | 6.311723  | -0.204712 | 0.381433  |
| 1  | 6.294494  | -1.731047 | 1.280586  |
| 1  | 6.382561  | -1.747087 | -0.487742 |
| 1  | 0.595574  | -2.279729 | -3.652323 |
| 1  | -1.038969 | -1.884174 | -3.102229 |
| 1  | 0.232362  | -0.674028 | -2.996097 |
| 1  | 0.601556  | -4.389502 | -2.018458 |
| 1  | -1.07248  | -3.881479 | -1.767031 |
| 1  | -0.022304 | -4.140657 | -0.374967 |
| 15 | 1.609364  | 0.458227  | 0.292709  |
| 6  | 2.457829  | 2.076592  | 0.04252   |
| 6  | 3.013314  | 2.658286  | 1.193432  |
| 6  | 2.562439  | 2.759331  | -1.182155 |
| 6  | 3.696107  | 3.876764  | 1.116897  |
| 1  | 2.911806  | 2.157156  | 2.15252   |
| 6  | 3.232769  | 3.978822  | -1.256544 |
| 1  | 2.115307  | 2.341832  | -2.079531 |
| 6  | 3.803426  | 4.538853  | -0.106567 |
| 1  | 4.128845  | 4.31011   | 2.013747  |
| 1  | 3.305154  | 4.49781   | -2.207994 |
| 1  | 4.324492  | 5.489864  | -0.167457 |
| 17 | -0.310284 | 1.056202  | -0.617524 |
| 6  | -5.744068 | 0.289344  | -1.037763 |
| 6  | -4.519068 | 0.276174  | -0.377123 |

|    |           |           |           |
|----|-----------|-----------|-----------|
| 6  | -3.942198 | 1.355144  | 0.300408  |
| 6  | -4.682597 | 2.544705  | 0.265056  |
| 6  | -5.923853 | 2.621833  | -0.385726 |
| 6  | -6.452111 | 1.499071  | -1.029287 |
| 1  | -6.144422 | -0.582771 | -1.545827 |
| 1  | -6.481669 | 3.554843  | -0.387836 |
| 1  | -7.414147 | 1.558167  | -1.53057  |
| 12 | -2.267135 | 0.209256  | 0.874273  |
| 35 | -1.101472 | -1.264658 | 2.380796  |
| 1  | -4.302352 | 3.433963  | 0.76499   |
| 8  | -3.670244 | -0.873034 | -0.336913 |
| 6  | -4.250094 | -2.182741 | -0.328902 |
| 1  | -3.446258 | -2.87056  | -0.063799 |
| 1  | -5.048711 | -2.239836 | 0.418759  |
| 1  | -4.646025 | -2.437285 | -1.317037 |

**TS<sub>1b-r</sub>**

E = -4543.869499      ZPVE = 0.488189      NIMAG = 1.

|   |              |              |              |
|---|--------------|--------------|--------------|
| 6 | -2.342753000 | -2.200059000 | -0.080873000 |
| 6 | -2.448582000 | -0.785402000 | 0.578659000  |
| 6 | -2.818702000 | -2.140692000 | -1.549071000 |
| 6 | -4.414898000 | -0.207067000 | -1.013938000 |
| 6 | -3.911858000 | -0.265239000 | 0.439669000  |
| 6 | -4.243064000 | -1.580889000 | -1.680697000 |
| 6 | -0.963048000 | -2.884236000 | 0.134586000  |
| 6 | -5.864694000 | 0.286022000  | -1.079994000 |
| 6 | -0.796743000 | -3.354262000 | 1.590037000  |
| 6 | -0.691295000 | -4.068006000 | -0.808922000 |

|    |              |              |              |
|----|--------------|--------------|--------------|
| 1  | -3.080628000 | -2.817762000 | 0.457760000  |
| 1  | -2.200421000 | -0.849534000 | 1.640745000  |
| 1  | -2.794624000 | -3.144096000 | -1.982738000 |
| 1  | -2.124136000 | -1.535110000 | -2.148765000 |
| 1  | -3.790563000 | 0.514970000  | -1.567689000 |
| 1  | -4.026397000 | 0.712441000  | 0.915829000  |
| 1  | -4.548360000 | -0.963508000 | 1.003658000  |
| 1  | -4.524902000 | -1.520187000 | -2.739560000 |
| 1  | -4.948573000 | -2.283853000 | -1.211533000 |
| 1  | -0.179006000 | -2.140192000 | -0.079635000 |
| 1  | -5.968984000 | 1.284515000  | -0.640581000 |
| 1  | -6.218914000 | 0.335787000  | -2.115643000 |
| 1  | -6.531707000 | -0.391861000 | -0.532492000 |
| 1  | -1.495604000 | -4.174854000 | 1.798595000  |
| 1  | 0.219531000  | -3.724352000 | 1.755343000  |
| 1  | -0.971828000 | -2.557678000 | 2.316904000  |
| 1  | -1.463585000 | -4.841649000 | -0.707551000 |
| 1  | 0.272209000  | -4.519298000 | -0.554302000 |
| 1  | -0.642636000 | -3.767981000 | -1.859506000 |
| 15 | -1.264315000 | 0.428008000  | -0.257052000 |
| 6  | -1.564497000 | 2.018453000  | 0.537998000  |
| 6  | -1.231930000 | 3.139775000  | -0.257605000 |
| 6  | -2.108181000 | 2.234939000  | 1.824054000  |
| 6  | -1.480768000 | 4.433661000  | 0.197992000  |
| 1  | -0.773435000 | 2.988025000  | -1.230707000 |
| 6  | -2.344445000 | 3.526704000  | 2.278367000  |
| 1  | -2.309714000 | 1.391869000  | 2.474496000  |
| 6  | -2.038493000 | 4.627238000  | 1.464280000  |
| 1  | -1.227890000 | 5.285398000  | -0.425761000 |
| 1  | -2.754604000 | 3.683388000  | 3.271407000  |

|    |              |              |              |
|----|--------------|--------------|--------------|
| 1  | -2.221995000 | 5.634376000  | 1.827489000  |
| 17 | 0.383594000  | -0.045140000 | 2.434291000  |
| 6  | 3.484959000  | 2.227611000  | -1.692767000 |
| 6  | 2.758943000  | 1.437183000  | -0.802337000 |
| 6  | 1.565947000  | 0.781743000  | -1.138493000 |
| 6  | 1.098789000  | 0.967919000  | -2.435708000 |
| 6  | 1.792236000  | 1.759760000  | -3.365050000 |
| 6  | 2.976914000  | 2.393780000  | -2.986901000 |
| 1  | 4.409477000  | 2.715762000  | -1.401596000 |
| 1  | 1.409678000  | 1.875539000  | -4.375547000 |
| 1  | 3.517785000  | 3.013337000  | -3.696364000 |
| 12 | 1.844332000  | -0.464296000 | 0.696613000  |
| 35 | 3.145419000  | -2.458022000 | 0.326749000  |
| 1  | 0.167334000  | 0.495083000  | -2.747268000 |
| 8  | 3.181403000  | 1.173026000  | 0.514332000  |
| 6  | 4.550047000  | 1.393233000  | 0.880334000  |
| 1  | 4.666059000  | 0.972813000  | 1.879106000  |
| 1  | 5.219482000  | 0.882530000  | 0.181573000  |
| 1  | 4.767518000  | 2.465312000  | 0.906877000  |

**PC<sub>1b-r</sub>**

E = -4543.960401    ZPVE = 0.491933    NIMAG = 0.

|   |          |           |           |
|---|----------|-----------|-----------|
| 6 | 1.504566 | -2.308516 | -0.567667 |
| 6 | 1.769388 | -0.770094 | -0.643986 |
| 6 | 2.626348 | -3.007088 | 0.228325  |
| 6 | 4.321935 | -1.265058 | -0.59614  |
| 6 | 3.157831 | -0.550633 | -1.309823 |
| 6 | 4.003285 | -2.757042 | -0.409184 |

|    |           |           |           |
|----|-----------|-----------|-----------|
| 6  | 0.061513  | -2.715063 | -0.157866 |
| 6  | 5.640528  | -1.058498 | -1.352262 |
| 6  | -0.959072 | -2.225994 | -1.204144 |
| 6  | -0.120137 | -4.233535 | 0.016829  |
| 1  | 1.616801  | -2.653765 | -1.610865 |
| 1  | 1.021048  | -0.310857 | -1.295918 |
| 1  | 2.448429  | -4.085906 | 0.260195  |
| 1  | 2.625608  | -2.658108 | 1.269771  |
| 1  | 4.432528  | -0.819696 | 0.402051  |
| 1  | 3.382143  | 0.517948  | -1.395909 |
| 1  | 3.087985  | -0.929439 | -2.34061  |
| 1  | 4.786855  | -3.231082 | 0.195821  |
| 1  | 4.030256  | -3.251355 | -1.392722 |
| 1  | -0.179817 | -2.247875 | 0.801192  |
| 1  | 5.881964  | 0.006023  | -1.450215 |
| 1  | 6.474277  | -1.544183 | -0.832398 |
| 1  | 5.585681  | -1.482965 | -2.362854 |
| 1  | -0.922773 | -2.840045 | -2.111468 |
| 1  | -1.984114 | -2.277588 | -0.817741 |
| 1  | -0.705251 | -1.212347 | -1.551065 |
| 1  | 0.228562  | -4.780025 | -0.86877  |
| 1  | -1.180088 | -4.472792 | 0.15594   |
| 1  | 0.418805  | -4.618374 | 0.886546  |
| 15 | 1.807043  | 0.179971  | 1.011081  |
| 6  | 1.783259  | 1.958807  | 0.47177   |
| 6  | 2.147211  | 2.893693  | 1.459362  |
| 6  | 1.49486   | 2.434797  | -0.817679 |
| 6  | 2.193591  | 4.26117   | 1.178272  |
| 1  | 2.402338  | 2.544977  | 2.457306  |
| 6  | 1.559017  | 3.801328  | -1.105821 |

|    |           |           |           |
|----|-----------|-----------|-----------|
| 1  | 1.191703  | 1.757999  | -1.608809 |
| 6  | 1.902553  | 4.719565  | -0.110161 |
| 1  | 2.470657  | 4.963323  | 1.959562  |
| 1  | 1.326503  | 4.143696  | -2.11015  |
| 1  | 1.950045  | 5.78064   | -0.337471 |
| 17 | -1.44312  | 1.204986  | -3.142266 |
| 6  | -2.245374 | 0.221206  | 2.323467  |
| 6  | -1.126075 | 0.426016  | 1.516472  |
| 6  | 0.158947  | -0.013017 | 1.87974   |
| 6  | 0.257366  | -0.667737 | 3.125506  |
| 6  | -0.849003 | -0.886732 | 3.946924  |
| 6  | -2.107675 | -0.439605 | 3.544164  |
| 1  | -3.220469 | 0.543801  | 1.974248  |
| 1  | -0.724835 | -1.39857  | 4.896408  |
| 1  | -2.981301 | -0.605557 | 4.166776  |
| 12 | -2.339642 | 0.216799  | -1.328387 |
| 35 | -4.481526 | -0.536745 | -0.599951 |
| 1  | 1.23753   | -1.006363 | 3.448831  |
| 8  | -1.333097 | 1.081267  | 0.279729  |
| 6  | -1.616079 | 2.511138  | 0.403174  |
| 1  | -1.719752 | 2.888983  | -0.61492  |
| 1  | -2.538858 | 2.657587  | 0.96956   |
| 1  | -0.773886 | 2.997273  | 0.895453  |

**P<sub>lb-r</sub>**

E = -1311.763713      ZPVE = 0.487806      NIMAG = 0.

|   |           |          |           |
|---|-----------|----------|-----------|
| 6 | -0.757526 | 0.934362 | 0.606455  |
| 6 | -2.252491 | 2.46333  | -0.790741 |



|   |           |           |           |
|---|-----------|-----------|-----------|
| 6 | 0.112167  | 3.24104   | -0.186397 |
| 6 | 0.116686  | 2.171919  | 0.919783  |
| 6 | -1.332971 | 3.658937  | -0.495844 |
| 6 | -3.254574 | 0.256647  | 0.162253  |
| 6 | 0.983974  | 4.443416  | 0.19602   |
| 6 | -3.439528 | -0.530793 | 1.472136  |
| 6 | -4.634367 | 0.743271  | -0.318662 |
| 1 | -0.742802 | 0.293213  | 1.491725  |
| 1 | -3.271947 | 2.836804  | -0.925709 |
| 1 | -1.959809 | 1.995353  | -1.739693 |
| 1 | 0.537868  | 2.79441   | -1.097096 |
| 1 | 1.142651  | 1.868437  | 1.143954  |
| 1 | -0.276854 | 2.629336  | 1.841577  |
| 1 | -1.348859 | 4.358314  | -1.342313 |
| 1 | -1.730456 | 4.21174   | 0.370068  |
| 1 | -2.873576 | -0.435775 | -0.600598 |
| 1 | 2.022098  | 4.141637  | 0.376634  |
| 1 | 0.988008  | 5.199445  | -0.597871 |
| 1 | 0.610487  | 4.923292  | 1.110021  |
| 1 | -3.871273 | 0.115006  | 2.248153  |
| 1 | -4.121964 | -1.374937 | 1.324287  |
| 1 | -2.501423 | -0.937651 | 1.856031  |
| 1 | -5.039282 | 1.514525  | 0.34984   |
| 1 | -5.344909 | -0.090891 | -0.3259   |
| 1 | -4.605254 | 1.155745  | -1.330898 |
| 6 | -0.486524 | -1.843162 | -0.51386  |
| 6 | -0.867643 | -2.606634 | -1.631549 |
| 6 | -0.447987 | -2.480011 | 0.737883  |
| 6 | -1.192822 | -3.960719 | -1.508619 |
| 1 | -0.912037 | -2.130779 | -2.607851 |

|    |           |           |           |
|----|-----------|-----------|-----------|
| 6  | -0.777779 | -3.831403 | 0.865823  |
| 1  | -0.144885 | -1.921538 | 1.615129  |
| 6  | -1.149925 | -4.577452 | -0.256559 |
| 1  | -1.483302 | -4.528377 | -2.388395 |
| 1  | -0.742463 | -4.303343 | 1.844387  |
| 1  | -1.405609 | -5.628408 | -0.154323 |
| 6  | -2.225236 | 1.410174  | 0.33904   |
| 1  | -2.52395  | 1.940325  | 1.261034  |
| 15 | -0.05886  | -0.061807 | -0.866438 |
| 6  | 2.518566  | 0.185868  | -1.821522 |
| 6  | 3.916599  | 0.17241   | -1.858364 |
| 6  | 4.620282  | -0.094735 | -0.68742  |
| 6  | 3.935489  | -0.341552 | 0.506614  |
| 6  | 2.534595  | -0.327053 | 0.53068   |
| 6  | 1.793607  | -0.0643   | -0.646565 |
| 1  | 1.961928  | 0.39364   | -2.731373 |
| 1  | 4.440897  | 0.368728  | -2.788382 |
| 1  | 5.706528  | -0.111449 | -0.688643 |
| 1  | 4.501972  | -0.544144 | 1.407587  |
| 8  | 1.81606   | -0.548025 | 1.674719  |
| 6  | 2.510329  | -0.81677  | 2.887127  |
| 1  | 3.114165  | -1.729037 | 2.808836  |
| 1  | 3.151841  | 0.024673  | 3.176359  |
| 1  | 1.739126  | -0.957735 | 3.645978  |

**R1<sub>II</sub> + b** SN2@P-f pathway

**RC<sub>IIb-r</sub>**

E = -4235.413002      ZPVE = 0.370297      NIMAG = 0.

|    |           |           |           |
|----|-----------|-----------|-----------|
| 15 | 1.949744  | -0.575732 | -0.437989 |
| 17 | 0.656501  | 0.258798  | 1.104604  |
| 6  | 3.38667   | 0.687719  | -0.316687 |
| 6  | 2.85516   | 1.926201  | -1.077906 |
| 1  | 2.589235  | 1.683003  | -2.11206  |
| 1  | 1.979264  | 2.372312  | -0.597334 |
| 1  | 3.640912  | 2.691245  | -1.106464 |
| 6  | 4.5782    | 0.097611  | -1.103106 |
| 1  | 5.312291  | 0.89347   | -1.277742 |
| 1  | 5.0846    | -0.699629 | -0.551939 |
| 1  | 4.282371  | -0.289462 | -2.085275 |
| 6  | 3.842888  | 1.115433  | 1.088119  |
| 1  | 4.620672  | 1.882775  | 0.985787  |
| 1  | 3.024913  | 1.552943  | 1.665351  |
| 1  | 4.267776  | 0.290588  | 1.662944  |
| 12 | -1.470408 | 1.046923  | -0.316151 |
| 35 | -1.008512 | 3.389478  | -0.320289 |
| 6  | -2.372149 | -0.737507 | -0.97944  |
| 6  | -3.155626 | -0.865753 | 0.173365  |
| 6  | -2.548027 | -1.742818 | -1.936601 |
| 6  | -4.058527 | -1.892929 | 0.430395  |
| 6  | -3.441267 | -2.808779 | -1.733919 |
| 1  | -1.982938 | -1.709278 | -2.86661  |
| 6  | -4.189844 | -2.88102  | -0.55778  |
| 1  | -4.644929 | -1.948118 | 1.342062  |
| 1  | -3.557597 | -3.576028 | -2.495063 |
| 1  | -4.884048 | -3.70172  | -0.400213 |
| 8  | -2.90869  | 0.210671  | 1.070439  |
| 6  | -3.699137 | 0.364113  | 2.24851   |
| 1  | -3.545697 | -0.481154 | 2.928409  |

|   |           |           |           |
|---|-----------|-----------|-----------|
| 1 | -3.365286 | 1.286028  | 2.725611  |
| 1 | -4.760503 | 0.444956  | 1.98956   |
| 6 | 2.375353  | -2.253937 | 0.376053  |
| 6 | 3.181948  | -2.218376 | 1.682343  |
| 1 | 3.253902  | -3.235194 | 2.089418  |
| 1 | 4.20223   | -1.85711  | 1.528172  |
| 1 | 2.701829  | -1.592576 | 2.44062   |
| 6 | 1.02391   | -2.964712 | 0.620671  |
| 1 | 0.379154  | -2.946456 | -0.264107 |
| 1 | 1.218798  | -4.014098 | 0.873381  |
| 1 | 0.471132  | -2.516619 | 1.449416  |
| 6 | 3.141068  | -3.050809 | -0.708913 |
| 1 | 3.284795  | -4.078121 | -0.352689 |
| 1 | 2.579324  | -3.104166 | -1.647751 |
| 1 | 4.129756  | -2.637954 | -0.922108 |

**TS<sub>nb-r</sub>**

E = -4235.368161    ZPVE = 0.369030    NIMAG = 1.

|    |          |           |           |
|----|----------|-----------|-----------|
| 15 | 1.810327 | 0.327049  | 0.530982  |
| 17 | 0.623095 | -1.119152 | -2.010541 |
| 6  | 2.557933 | -1.379372 | 0.930457  |
| 6  | 1.457305 | -2.119726 | 1.725328  |
| 1  | 1.009548 | -1.493175 | 2.50411   |
| 1  | 0.655855 | -2.4808   | 1.073828  |
| 1  | 1.895858 | -2.997928 | 2.214531  |
| 6  | 3.686561 | -0.956728 | 1.922784  |
| 1  | 4.032282 | -1.864629 | 2.432628  |
| 1  | 4.546306 | -0.519018 | 1.407804  |

|    |           |           |           |
|----|-----------|-----------|-----------|
| 1  | 3.347272  | -0.26167  | 2.699282  |
| 6  | 3.142736  | -2.319562 | -0.131047 |
| 1  | 3.512311  | -3.221459 | 0.374019  |
| 1  | 2.387064  | -2.619684 | -0.856683 |
| 1  | 3.981666  | -1.877762 | -0.669541 |
| 12 | -1.130337 | -0.761307 | -0.565163 |
| 35 | -2.670084 | -2.315114 | 0.411948  |
| 6  | -0.938556 | 1.157357  | 0.584     |
| 6  | -2.021621 | 1.610473  | -0.186123 |
| 6  | -0.698971 | 1.831968  | 1.7763    |
| 6  | -2.850746 | 2.664416  | 0.196846  |
| 6  | -1.513363 | 2.890097  | 2.205191  |
| 1  | 0.15178   | 1.542224  | 2.392975  |
| 6  | -2.577145 | 3.312011  | 1.406725  |
| 1  | -3.683807 | 2.986797  | -0.418891 |
| 1  | -1.307875 | 3.387211  | 3.149035  |
| 1  | -3.203303 | 4.142153  | 1.72019   |
| 8  | -2.238302 | 0.849637  | -1.351309 |
| 6  | -3.505671 | 0.9197    | -2.021598 |
| 1  | -3.637023 | 1.904487  | -2.479213 |
| 1  | -3.474471 | 0.157792  | -2.800262 |
| 1  | -4.319923 | 0.707001  | -1.322579 |
| 6  | 2.82339   | 1.322962  | -0.733409 |
| 6  | 3.731112  | 0.588326  | -1.728253 |
| 1  | 4.176162  | 1.325873  | -2.408544 |
| 1  | 4.555454  | 0.071962  | -1.228847 |
| 1  | 3.172974  | -0.131769 | -2.328842 |
| 6  | 1.826902  | 2.227859  | -1.497453 |
| 1  | 1.164112  | 2.773721  | -0.819895 |
| 1  | 2.398859  | 2.961963  | -2.078644 |

|   |          |          |           |
|---|----------|----------|-----------|
| 1 | 1.213186 | 1.642826 | -2.185171 |
| 6 | 3.689176 | 2.23568  | 0.187873  |
| 1 | 4.228709 | 2.943104 | -0.454303 |
| 1 | 3.082566 | 2.81923  | 0.887499  |
| 1 | 4.43608  | 1.676189 | 0.758512  |

**PC<sub>IIb-r</sub>**

E = -4235.462125    ZPVE = 0.372972    NIMAG = 0.

|    |           |           |           |
|----|-----------|-----------|-----------|
| 15 | 2.310423  | 0.616027  | 0.519085  |
| 17 | -1.596685 | -3.36235  | -0.890453 |
| 6  | 1.489972  | -0.290736 | 2.006003  |
| 6  | 1.200973  | 0.821411  | 3.041162  |
| 1  | 2.119658  | 1.337524  | 3.335908  |
| 1  | 0.498604  | 1.567603  | 2.656825  |
| 1  | 0.755561  | 0.379868  | 3.941626  |
| 6  | 2.514579  | -1.267198 | 2.618943  |
| 1  | 2.137246  | -1.628729 | 3.583635  |
| 1  | 2.688559  | -2.143321 | 1.988814  |
| 1  | 3.476306  | -0.777269 | 2.802628  |
| 6  | 0.17239   | -1.039835 | 1.734637  |
| 1  | -0.610177 | -0.3029   | 1.500943  |
| 1  | 0.289036  | -1.802085 | 0.955049  |
| 1  | -0.164634 | -1.555737 | 2.642336  |
| 12 | -1.789357 | -1.260852 | -0.121388 |
| 35 | -3.483248 | 0.139404  | 0.795296  |
| 6  | 0.892768  | 1.597782  | -0.235463 |
| 6  | -0.258297 | 1.247274  | -0.966784 |
| 6  | 1.031626  | 2.977428  | 0.042782  |

|   |           |           |           |
|---|-----------|-----------|-----------|
| 6 | -1.214349 | 2.185431  | -1.359483 |
| 6 | 0.096388  | 3.932406  | -0.353538 |
| 1 | 1.915049  | 3.29623   | 0.587451  |
| 6 | -1.037299 | 3.533728  | -1.059889 |
| 1 | -2.112519 | 1.855338  | -1.868664 |
| 1 | 0.255923  | 4.978328  | -0.110187 |
| 1 | -1.789517 | 4.256024  | -1.360756 |
| 8 | -0.513666 | -0.106948 | -1.307796 |
| 6 | -0.649523 | -0.373549 | -2.737786 |
| 1 | 0.22553   | 0.015632  | -3.259121 |
| 1 | -0.70953  | -1.457729 | -2.835443 |
| 1 | -1.557728 | 0.091479  | -3.127805 |
| 6 | 3.001743  | -0.624781 | -0.779304 |
| 6 | 2.25402   | -1.945229 | -1.025032 |
| 1 | 2.774587  | -2.519369 | -1.803098 |
| 1 | 2.228883  | -2.576468 | -0.132431 |
| 1 | 1.227549  | -1.79729  | -1.356608 |
| 6 | 3.131334  | 0.170937  | -2.095677 |
| 1 | 3.688031  | 1.103384  | -1.950329 |
| 1 | 3.676565  | -0.430924 | -2.833455 |
| 1 | 2.161195  | 0.429475  | -2.525423 |
| 6 | 4.438488  | -0.952398 | -0.300356 |
| 1 | 4.94262   | -1.558296 | -1.06399  |
| 1 | 5.028519  | -0.044162 | -0.143753 |
| 1 | 4.448391  | -1.526417 | 0.62964   |

**P<sub>11b-r</sub>**

E = -1003.266468      ZPVE = 0.368521      NIMAG = 0.

|    |           |           |           |
|----|-----------|-----------|-----------|
| 15 | -0.8664   | -0.460742 | -0.807631 |
| 6  | -1.438206 | -1.514591 | 0.701279  |
| 6  | -0.854382 | -2.922407 | 0.440557  |
| 1  | -1.174158 | -3.32004  | -0.528315 |
| 1  | 0.239898  | -2.919885 | 0.462882  |
| 1  | -1.201906 | -3.611942 | 1.221204  |
| 6  | -2.977042 | -1.61908  | 0.648147  |
| 1  | -3.317193 | -2.36355  | 1.379904  |
| 1  | -3.467778 | -0.673325 | 0.895097  |
| 1  | -3.327338 | -1.939479 | -0.339164 |
| 6  | -0.996362 | -1.058525 | 2.102964  |
| 1  | 0.092381  | -1.029091 | 2.189894  |
| 1  | -1.381221 | -0.070892 | 2.362334  |
| 1  | -1.372003 | -1.772123 | 2.849989  |
| 6  | 0.986461  | -0.338189 | -0.592198 |
| 6  | 1.752576  | 0.395478  | 0.346614  |
| 6  | 1.699001  | -1.12125  | -1.517278 |
| 6  | 3.15279   | 0.318389  | 0.351039  |
| 6  | 3.094159  | -1.211019 | -1.519609 |
| 1  | 1.12948   | -1.674796 | -2.258482 |
| 6  | 3.818517  | -0.4862   | -0.577654 |
| 1  | 3.7331    | 0.881268  | 1.072143  |
| 1  | 3.600237  | -1.832949 | -2.251423 |
| 1  | 4.903738  | -0.533192 | -0.558569 |
| 8  | 1.065874  | 1.183218  | 1.229486  |
| 6  | 1.785626  | 1.924604  | 2.206733  |
| 1  | 2.465445  | 2.649309  | 1.741979  |
| 1  | 1.032153  | 2.459189  | 2.787359  |
| 1  | 2.354276  | 1.263964  | 2.87278   |
| 6  | -1.619334 | 1.317185  | -0.754614 |



|   |           |          |           |
|---|-----------|----------|-----------|
| 6 | -1.955767 | 1.945723 | 0.609311  |
| 1 | -2.359433 | 2.955517 | 0.449516  |
| 1 | -2.720969 | 1.377551 | 1.146086  |
| 1 | -1.074208 | 2.027881 | 1.244305  |
| 6 | -0.642045 | 2.236753 | -1.516637 |
| 1 | -0.356232 | 1.812972 | -2.485976 |
| 1 | -1.127395 | 3.202967 | -1.708266 |
| 1 | 0.268997  | 2.424916 | -0.943713 |
| 6 | -2.923054 | 1.218765 | -1.584827 |
| 1 | -3.376083 | 2.215086 | -1.674425 |
| 1 | -2.729193 | 0.840562 | -2.593313 |
| 1 | -3.663224 | 0.561659 | -1.118209 |

**R1<sub>III</sub> + b<sub>S<sub>N</sub>2@P-f</sub>** pathway

**RC<sub>IIIb-r</sub>**

E = -4383.010526      ZPVE = 0.307548      NIMAG = 0.

|    |          |           |           |
|----|----------|-----------|-----------|
| 15 | 1.547483 | 0.021599  | 0.75982   |
| 6  | 1.641604 | 1.468981  | -0.366375 |
| 6  | 0.984129 | 2.634025  | 0.063768  |
| 6  | 2.30018  | 1.46708   | -1.609655 |
| 6  | 1.00315  | 3.78644   | -0.727918 |
| 1  | 0.446739 | 2.637182  | 1.008232  |
| 6  | 2.310943 | 2.615445  | -2.398618 |
| 1  | 2.801871 | 0.569032  | -1.956688 |
| 6  | 1.666473 | 3.777962  | -1.955913 |
| 1  | 0.494511 | 4.682334  | -0.385302 |
| 1  | 2.820301 | 2.606935  | -3.357905 |
| 1  | 1.680175 | 4.672319  | -2.572369 |
| 17 | 0.353924 | -1.347481 | -0.474606 |

|    |           |           |           |
|----|-----------|-----------|-----------|
| 6  | -3.02875  | 2.723756  | 0.320176  |
| 6  | -2.718742 | 1.367048  | 0.315253  |
| 6  | -2.238026 | 0.633944  | 1.407787  |
| 6  | -2.066607 | 1.366374  | 2.588108  |
| 6  | -2.356501 | 2.740343  | 2.655317  |
| 6  | -2.835995 | 3.411727  | 1.528345  |
| 1  | -3.403837 | 3.244713  | -0.555053 |
| 1  | -2.217262 | 3.282598  | 3.58714   |
| 1  | -3.070293 | 4.471404  | 1.581013  |
| 12 | -2.185225 | -1.172928 | 0.311718  |
| 35 | -2.88261  | -3.316477 | -0.458809 |
| 1  | -1.70174  | 0.869555  | 3.485345  |
| 8  | -2.850838 | 0.531828  | -0.825225 |
| 6  | -3.460872 | 1.016955  | -2.020885 |
| 1  | -3.49853  | 0.17048   | -2.707022 |
| 1  | -4.476242 | 1.372816  | -1.814897 |
| 1  | -2.8628   | 1.823854  | -2.457812 |
| 6  | 3.201971  | -0.767505 | 0.5295    |
| 6  | 3.364006  | -2.163219 | 0.517527  |
| 6  | 4.348069  | 0.047249  | 0.582178  |
| 6  | 4.641191  | -2.72715  | 0.532291  |
| 1  | 2.496733  | -2.814082 | 0.479448  |
| 6  | 5.622951  | -0.522269 | 0.610811  |
| 1  | 4.252294  | 1.128726  | 0.598366  |
| 6  | 5.774076  | -1.910449 | 0.580002  |
| 1  | 4.748145  | -3.807604 | 0.506303  |
| 1  | 6.496393  | 0.12231   | 0.647002  |
| 1  | 6.765817  | -2.352573 | 0.594519  |

**TS<sub>mb-r</sub>**

E = -4382.977540      ZPVE = 0.306926      NIMAG = 1.

|    |           |           |           |
|----|-----------|-----------|-----------|
| 15 | -1.441918 | -0.091921 | 0.95509   |
| 6  | -1.671525 | -1.593588 | -0.042821 |
| 6  | -1.470849 | -2.812578 | 0.638106  |
| 6  | -1.999934 | -1.620193 | -1.413185 |
| 6  | -1.652855 | -4.02824  | -0.020821 |
| 1  | -1.168448 | -2.807278 | 1.681464  |
| 6  | -2.155021 | -2.838756 | -2.07172  |
| 1  | -2.088417 | -0.689042 | -1.96224  |
| 6  | -1.995183 | -4.042714 | -1.375868 |
| 1  | -1.509731 | -4.959897 | 0.517951  |
| 1  | -2.393976 | -2.849711 | -3.131092 |
| 1  | -2.119772 | -4.989234 | -1.893899 |
| 17 | -0.524388 | 1.630261  | -1.473016 |
| 6  | 2.945141  | -2.363974 | 0.477976  |
| 6  | 2.171458  | -1.265146 | 0.104685  |
| 6  | 1.343247  | -0.560325 | 0.98968   |
| 6  | 1.31398   | -1.008248 | 2.309524  |
| 6  | 2.08397   | -2.101084 | 2.733009  |
| 6  | 2.886309  | -2.78108  | 1.812962  |
| 1  | 3.57897   | -2.887113 | -0.23062  |
| 1  | 2.060025  | -2.41644  | 3.77263   |
| 1  | 3.476366  | -3.636357 | 2.129484  |
| 12 | 1.473535  | 1.163826  | -0.413239 |
| 35 | 3.443758  | 2.507785  | -0.144242 |
| 1  | 0.677206  | -0.503563 | 3.036176  |
| 8  | 2.187638  | -0.707883 | -1.186683 |
| 6  | 3.276279  | -1.008528 | -2.072131 |

|   |           |           |           |
|---|-----------|-----------|-----------|
| 1 | 3.139052  | -0.368594 | -2.94366  |
| 1 | 4.232823  | -0.782596 | -1.591473 |
| 1 | 3.236589  | -2.057763 | -2.379962 |
| 6 | -2.88532  | 0.93912   | 0.575124  |
| 6 | -2.883606 | 2.206829  | 1.204137  |
| 6 | -4.050631 | 0.528238  | -0.108436 |
| 6 | -3.988771 | 3.046454  | 1.122221  |
| 1 | -1.999519 | 2.535881  | 1.743816  |
| 6 | -5.163687 | 1.364109  | -0.169248 |
| 1 | -4.094356 | -0.449274 | -0.572976 |
| 6 | -5.132572 | 2.626107  | 0.433354  |
| 1 | -3.963495 | 4.023226  | 1.595214  |
| 1 | -6.057518 | 1.031569  | -0.688705 |
| 1 | -6.00009  | 3.276814  | 0.374311  |

**PC<sub>IIIb-r</sub>**

E = -4383.082369      ZPVE = 0.310265      NIMAG = 0.

|    |          |           |           |
|----|----------|-----------|-----------|
| 15 | 1.593112 | 0.459386  | 1.638663  |
| 6  | 2.813335 | -0.007415 | 0.32045   |
| 6  | 4.017223 | 0.720429  | 0.332221  |
| 6  | 2.657289 | -1.033685 | -0.625201 |
| 6  | 5.026973 | 0.452225  | -0.594448 |
| 1  | 4.16763  | 1.499402  | 1.075846  |
| 6  | 3.677164 | -1.315115 | -1.538687 |
| 1  | 1.743893 | -1.617185 | -0.670399 |
| 6  | 4.860539 | -0.57163  | -1.531101 |
| 1  | 5.946382 | 1.030282  | -0.572674 |
| 1  | 3.536839 | -2.114427 | -2.260839 |

|    |           |           |           |
|----|-----------|-----------|-----------|
| 1  | 5.649275  | -0.793149 | -2.24427  |
| 17 | -0.692747 | -2.592    | -1.948127 |
| 6  | -0.844361 | 2.928915  | -0.759411 |
| 6  | -0.104702 | 1.831135  | -0.32413  |
| 6  | 0.595855  | 1.839204  | 0.893726  |
| 6  | 0.532205  | 3.019633  | 1.65761   |
| 6  | -0.187464 | 4.135751  | 1.227828  |
| 6  | -0.877909 | 4.088468  | 0.016082  |
| 1  | -1.419934 | 2.859598  | -1.675777 |
| 1  | -0.214906 | 5.031428  | 1.840544  |
| 1  | -1.461731 | 4.940104  | -0.318878 |
| 12 | -1.526075 | -0.850249 | -0.770859 |
| 35 | -3.646295 | 0.273517  | -0.596365 |
| 1  | 1.059687  | 3.051402  | 2.606601  |
| 8  | -0.101812 | 0.663517  | -1.10845  |
| 6  | 0.493554  | 0.804895  | -2.432684 |
| 1  | 0.489239  | -0.19345  | -2.868582 |
| 1  | -0.10226  | 1.490819  | -3.03922  |
| 1  | 1.515064  | 1.171727  | -2.320786 |
| 6  | 0.394023  | -0.947155 | 1.690368  |
| 6  | -1.001887 | -0.739954 | 1.722695  |
| 6  | 0.872086  | -2.255825 | 1.88562   |
| 6  | -1.886392 | -1.815478 | 1.920946  |
| 1  | -1.414383 | 0.263916  | 1.649315  |
| 6  | -0.00865  | -3.321875 | 2.071029  |
| 1  | 1.94108   | -2.447308 | 1.88477   |
| 6  | -1.390315 | -3.110162 | 2.082328  |
| 1  | -2.954748 | -1.623574 | 1.937568  |
| 1  | 0.387228  | -4.32518  | 2.196957  |
| 1  | -2.072031 | -3.943631 | 2.217254  |

**P<sub>11b-r</sub>**

E = -1150.873876    ZPVE = 0.305799    NIMAG = 0.

|    |           |           |           |
|----|-----------|-----------|-----------|
| 15 | 0.195897  | -0.016729 | -1.36989  |
| 6  | 0.607782  | -1.629979 | -0.543361 |
| 6  | 0.162668  | -2.79128  | -1.197402 |
| 6  | 1.360548  | -1.772012 | 0.632611  |
| 6  | 0.435456  | -4.059399 | -0.677656 |
| 1  | -0.399072 | -2.702367 | -2.124248 |
| 6  | 1.653138  | -3.039356 | 1.141935  |
| 1  | 1.716295  | -0.889807 | 1.153497  |
| 6  | 1.186621  | -4.18696  | 0.493258  |
| 1  | 0.075663  | -4.944036 | -1.19575  |
| 1  | 2.24189   | -3.130246 | 2.051056  |
| 1  | 1.413364  | -5.171258 | 0.893278  |
| 6  | -3.20051  | 0.709439  | 1.005793  |
| 6  | -1.877212 | 0.410592  | 0.651742  |
| 6  | -1.480277 | 0.415769  | -0.708195 |
| 6  | -2.447577 | 0.73593   | -1.671924 |
| 6  | -3.767297 | 1.043893  | -1.327231 |
| 6  | -4.136531 | 1.024324  | 0.015845  |
| 1  | -3.509094 | 0.702351  | 2.044373  |
| 1  | -4.49142  | 1.288984  | -2.097713 |
| 1  | -5.157438 | 1.254534  | 0.307629  |
| 1  | -2.150749 | 0.738489  | -2.717271 |
| 8  | -0.911304 | 0.11513   | 1.564259  |
| 6  | -1.251804 | 0.052926  | 2.943548  |
| 1  | -0.331835 | -0.219694 | 3.461828  |

|   |           |          |           |
|---|-----------|----------|-----------|
| 1 | -1.603434 | 1.024081 | 3.313516  |
| 1 | -2.015443 | -0.71142 | 3.132132  |
| 6 | 1.346973  | 1.198827 | -0.582846 |
| 6 | 0.91214   | 2.387845 | 0.022449  |
| 6 | 2.731063  | 1.00233  | -0.745248 |
| 6 | 1.831372  | 3.342397 | 0.468155  |
| 1 | -0.149535 | 2.573663 | 0.149195  |
| 6 | 3.64967   | 1.949113 | -0.28961  |
| 1 | 3.096029  | 0.100661 | -1.230814 |
| 6 | 3.202992  | 3.126013 | 0.319573  |
| 1 | 1.471358  | 4.255316 | 0.935055  |
| 1 | 4.713776  | 1.770989 | -0.418501 |
| 1 | 3.916312  | 3.867189 | 0.668392  |

**R1<sub>iv</sub> + b S<sub>N2</sub>@P-f pathway**

**RC<sub>ivb-r</sub>**

E = -4191.268247      ZPVE = 0.254090      NIMAG = 0.

|    |           |           |           |
|----|-----------|-----------|-----------|
| 17 | 0.451254  | -2.012866 | -0.212493 |
| 15 | -1.357068 | -1.667803 | -1.400243 |
| 12 | 1.988057  | 0.167024  | -0.286908 |
| 35 | 4.005432  | -0.901924 | 0.394749  |
| 6  | -1.823525 | -3.45453  | -1.567712 |
| 1  | -1.096737 | -3.945064 | -2.220435 |
| 1  | -1.873924 | -3.997702 | -0.621069 |
| 1  | -2.805461 | -3.491249 | -2.053268 |
| 6  | -2.516577 | -1.084298 | -0.100061 |
| 6  | -2.990816 | -1.862633 | 0.97091   |
| 6  | -2.970093 | 0.239365  | -0.236503 |
| 6  | -3.908448 | -1.3318   | 1.875893  |

|   |           |           |           |
|---|-----------|-----------|-----------|
| 1 | -2.63998  | -2.880549 | 1.109312  |
| 6 | -3.892781 | 0.768527  | 0.670668  |
| 1 | -2.592199 | 0.86024   | -1.044274 |
| 6 | -4.36359  | -0.016098 | 1.724479  |
| 1 | -4.268175 | -1.940806 | 2.700192  |
| 1 | -4.234885 | 1.792259  | 0.55362   |
| 1 | -5.080866 | 0.393353  | 2.430022  |
| 6 | 0.71494   | 1.633163  | -1.123805 |
| 6 | 0.387996  | 2.169203  | 0.128376  |
| 6 | 0.13255   | 2.28046   | -2.219617 |
| 6 | -0.444314 | 3.261767  | 0.352501  |
| 6 | -0.722612 | 3.384558  | -2.058388 |
| 1 | 0.341022  | 1.929897  | -3.228897 |
| 6 | -1.006353 | 3.870952  | -0.780307 |
| 1 | -0.661771 | 3.641846  | 1.345651  |
| 1 | -1.158514 | 3.868941  | -2.928463 |
| 1 | -1.658706 | 4.730665  | -0.654235 |
| 8 | 1.029117  | 1.440052  | 1.164125  |
| 6 | 0.953429  | 1.875149  | 2.521267  |
| 1 | 1.347643  | 2.892475  | 2.619759  |
| 1 | -0.080953 | 1.838153  | 2.879616  |
| 1 | 1.569617  | 1.183233  | 3.095964  |

**TS<sub>IVb-r</sub>**

E = -4191.233239      ZPVE = 0.253660      NIMAG = 1.

|    |           |           |           |
|----|-----------|-----------|-----------|
| 17 | 0.23656   | -2.725417 | 0.223409  |
| 15 | -1.541007 | -1.091011 | -1.508028 |
| 12 | 1.523318  | -0.820646 | 0.063603  |



|    |           |           |           |
|----|-----------|-----------|-----------|
| 35 | 3.892566  | -0.507628 | 0.21413   |
| 6  | -2.16868  | -2.833005 | -1.644069 |
| 1  | -1.443226 | -3.432962 | -2.196498 |
| 1  | -2.438168 | -3.348763 | -0.723535 |
| 1  | -3.068421 | -2.716233 | -2.270557 |
| 6  | -2.616854 | -0.42702  | -0.201806 |
| 6  | -3.14081  | -1.177323 | 0.869399  |
| 6  | -2.994053 | 0.927755  | -0.331852 |
| 6  | -4.032007 | -0.596399 | 1.769252  |
| 1  | -2.826981 | -2.204401 | 1.018385  |
| 6  | -3.903112 | 1.498757  | 0.556946  |
| 1  | -2.571246 | 1.530222  | -1.13042  |
| 6  | -4.422217 | 0.73807   | 1.609272  |
| 1  | -4.420533 | -1.181876 | 2.59718   |
| 1  | -4.197412 | 2.536735  | 0.435086  |
| 1  | -5.12091  | 1.186217  | 2.309871  |
| 6  | 0.337109  | 0.768271  | -0.954238 |
| 6  | 0.486799  | 1.51117   | 0.227005  |
| 6  | 0.184031  | 1.497619  | -2.135781 |
| 6  | 0.468402  | 2.904942  | 0.27276   |
| 6  | 0.184217  | 2.898592  | -2.140204 |
| 1  | 0.04553   | 0.968711  | -3.077974 |
| 6  | 0.308527  | 3.59516   | -0.934455 |
| 1  | 0.586744  | 3.451325  | 1.202505  |
| 1  | 0.080943  | 3.442327  | -3.075084 |
| 1  | 0.291241  | 4.681148  | -0.927221 |
| 8  | 0.72038   | 0.700031  | 1.351279  |
| 6  | 1.260865  | 1.287394  | 2.545756  |
| 1  | 2.197158  | 1.807868  | 2.324115  |
| 1  | 0.532614  | 1.969599  | 2.99397   |

|   |          |          |          |
|---|----------|----------|----------|
| 1 | 1.450268 | 0.457902 | 3.226717 |
|---|----------|----------|----------|

**PC<sub>IVb-r</sub>**

E = -4191.328936    ZPVE = 0.256178    NIMAG = 0.

|    |           |           |           |
|----|-----------|-----------|-----------|
| 17 | -1.237096 | -3.55442  | -0.858791 |
| 15 | 1.195669  | 0.764769  | 1.689818  |
| 12 | -1.751149 | -1.462618 | -0.247324 |
| 35 | -3.478596 | -0.087103 | 0.622249  |
| 6  | 0.154353  | -0.74361  | 2.040132  |
| 1  | -0.883231 | -0.42146  | 2.180279  |
| 1  | 0.230255  | -1.526673 | 1.275008  |
| 1  | 0.480876  | -1.186146 | 2.985623  |
| 6  | 2.641814  | 0.057251  | 0.772584  |
| 6  | 3.053115  | -1.277075 | 0.924092  |
| 6  | 3.44508   | 0.918506  | 0.001363  |
| 6  | 4.218012  | -1.742328 | 0.304437  |
| 1  | 2.468861  | -1.971545 | 1.51961   |
| 6  | 4.603205  | 0.452565  | -0.622082 |
| 1  | 3.161339  | 1.960947  | -0.118672 |
| 6  | 4.993794  | -0.882824 | -0.47517  |
| 1  | 4.511857  | -2.780531 | 0.429847  |
| 1  | 5.202206  | 1.133293  | -1.220486 |
| 1  | 5.896648  | -1.24543  | -0.957376 |
| 6  | 0.274696  | 1.665235  | 0.34298   |
| 6  | -0.313514 | 1.136541  | -0.816065 |
| 6  | 0.149264  | 3.054301  | 0.531521  |
| 6  | -0.993698 | 1.928379  | -1.736879 |
| 6  | -0.504516 | 3.870497  | -0.393877 |

|   |           |           |           |
|---|-----------|-----------|-----------|
| 1 | 0.578418  | 3.494812  | 1.426895  |
| 6 | -1.080364 | 3.30582   | -1.532136 |
| 1 | -1.46155  | 1.465759  | -2.600579 |
| 1 | -0.577698 | 4.938802  | -0.215378 |
| 1 | -1.609708 | 3.925211  | -2.249217 |
| 8 | -0.285669 | -0.25751  | -1.052085 |
| 6 | 0.630489  | -0.699089 | -2.102221 |
| 1 | 0.360639  | -0.215665 | -3.043938 |
| 1 | 1.650046  | -0.443533 | -1.811496 |
| 1 | 0.506248  | -1.779158 | -2.174161 |

**PIVb-r**

E = -959.132021      ZPVE = 0.252569      NIMAG = 0.

|    |           |           |           |
|----|-----------|-----------|-----------|
| 15 | 0.161073  | 1.716692  | 0.338681  |
| 6  | 0.198703  | 1.621624  | 2.199985  |
| 1  | -0.724323 | 2.076993  | 2.57134   |
| 1  | 0.27411   | 0.600063  | 2.578526  |
| 1  | 1.033944  | 2.221245  | 2.57442   |
| 6  | 1.562724  | 0.612198  | -0.158757 |
| 6  | 2.654901  | 0.346554  | 0.682222  |
| 6  | 1.605916  | 0.122714  | -1.4766   |
| 6  | 3.748751  | -0.396265 | 0.225821  |
| 1  | 2.660003  | 0.709437  | 1.705272  |
| 6  | 2.691859  | -0.626941 | -1.930215 |
| 1  | 0.779338  | 0.323401  | -2.153716 |
| 6  | 3.771198  | -0.889616 | -1.080115 |
| 1  | 4.581747  | -0.59091  | 0.896241  |
| 1  | 2.697536  | -1.002132 | -2.950105 |

|   |           |           |           |
|---|-----------|-----------|-----------|
| 1 | 4.620007  | -1.46775  | -1.433879 |
| 6 | -1.329706 | 0.701146  | -0.09264  |
| 6 | -1.5647   | -0.636872 | 0.308927  |
| 6 | -2.300486 | 1.326033  | -0.887393 |
| 6 | -2.731203 | -1.303774 | -0.088943 |
| 6 | -3.47042  | 0.670272  | -1.285938 |
| 1 | -2.126034 | 2.351901  | -1.201087 |
| 6 | -3.677189 | -0.64663  | -0.88271  |
| 1 | -2.914117 | -2.32741  | 0.215596  |
| 1 | -4.202366 | 1.182379  | -1.902592 |
| 1 | -4.577075 | -1.177205 | -1.181179 |
| 8 | -0.60652  | -1.214768 | 1.089431  |
| 6 | -0.732697 | -2.586842 | 1.44236   |
| 1 | -1.618239 | -2.761437 | 2.066321  |
| 1 | -0.779826 | -3.224149 | 0.551074  |
| 1 | 0.165457  | -2.828267 | 2.012061  |

**R1<sub>v</sub> + b S<sub>N2</sub>@P-f pathway**

**RC<sub>v<sub>b-r</sub></sub>**

E = -3999.524470      ZPVE = 0.200439      NIMAG = 0.

|    |           |           |           |
|----|-----------|-----------|-----------|
| 17 | -0.414143 | 2.000534  | 0.407607  |
| 15 | 1.527339  | 2.573957  | -0.380112 |
| 12 | -1.079995 | -0.459962 | -0.471653 |
| 35 | -3.440812 | -0.184189 | -0.3741   |
| 6  | 1.551815  | 4.288677  | 0.328741  |
| 1  | 0.786487  | 4.899774  | -0.156539 |
| 1  | 1.398397  | 4.305817  | 1.411692  |
| 1  | 2.531325  | 4.724803  | 0.097878  |
| 6  | 2.612813  | 1.713639  | 0.847991  |

|   |           |           |           |
|---|-----------|-----------|-----------|
| 1 | 2.338559  | 1.930176  | 1.884632  |
| 1 | 2.584436  | 0.636448  | 0.668981  |
| 1 | 3.638346  | 2.060099  | 0.668463  |
| 6 | 0.834911  | -1.210592 | -0.958922 |
| 6 | 0.975807  | -1.854497 | 0.277647  |
| 6 | 1.913667  | -1.364871 | -1.837538 |
| 6 | 2.075232  | -2.606086 | 0.68194   |
| 6 | 3.052891  | -2.109919 | -1.486616 |
| 1 | 1.880108  | -0.902092 | -2.82218  |
| 6 | 3.130724  | -2.725746 | -0.235943 |
| 1 | 2.133108  | -3.08992  | 1.651851  |
| 1 | 3.874092  | -2.214906 | -2.190847 |
| 1 | 4.007818  | -3.306845 | 0.034574  |
| 8 | -0.168598 | -1.631837 | 1.088725  |
| 6 | -0.335648 | -2.324972 | 2.325581  |
| 1 | 0.441919  | -2.032299 | 3.039469  |
| 1 | -1.31503  | -2.034485 | 2.70642   |
| 1 | -0.30536  | -3.407934 | 2.164205  |

**TS<sub>Vb-r</sub>**

E = -3999.488267    ZPVE = 0.200370    NIMAG = 1.

|    |           |           |           |
|----|-----------|-----------|-----------|
| 17 | -1.056616 | -2.490272 | 0.37648   |
| 15 | -2.708297 | -0.364209 | -0.58369  |
| 12 | 0.585155  | -0.93437  | -0.035693 |
| 35 | 2.892756  | -1.121643 | -0.618608 |
| 6  | -3.893228 | -1.769119 | -0.257618 |
| 1  | -3.680066 | -2.617199 | -0.9095   |
| 1  | -3.956339 | -2.106403 | 0.779024  |

|   |           |           |           |
|---|-----------|-----------|-----------|
| 1 | -4.864223 | -1.338289 | -0.555428 |
| 6 | -3.148753 | 0.609084  | 0.928565  |
| 1 | -2.718025 | 0.142431  | 1.821196  |
| 1 | -2.779634 | 1.632572  | 0.853314  |
| 1 | -4.238845 | 0.604509  | 1.043253  |
| 6 | -0.505495 | 0.965192  | -0.486852 |
| 6 | 0.202397  | 1.492403  | 0.605119  |
| 6 | -0.802134 | 1.853268  | -1.52412  |
| 6 | 0.58636   | 2.829982  | 0.706317  |
| 6 | -0.412589 | 3.196939  | -1.477265 |
| 1 | -1.370628 | 1.497736  | -2.383374 |
| 6 | 0.265157  | 3.68254   | -0.355178 |
| 1 | 1.128801  | 3.20829   | 1.565939  |
| 1 | -0.642142 | 3.862186  | -2.304595 |
| 1 | 0.55346   | 4.728231  | -0.301991 |
| 8 | 0.547144  | 0.512192  | 1.554331  |
| 6 | 1.558326  | 0.804575  | 2.534951  |
| 1 | 1.204993  | 1.57911   | 3.221585  |
| 1 | 1.717583  | -0.12372  | 3.083121  |
| 1 | 2.486247  | 1.111516  | 2.044094  |

**PC<sub>Vb-r</sub>**

E = -3999.583583      ZPVE = 0.202731      NIMAG = 0.

|    |           |          |           |
|----|-----------|----------|-----------|
| 17 | -3.276346 | 1.621628 | 0.789661  |
| 15 | 1.641813  | 1.54479  | -1.52847  |
| 12 | -1.785704 | 0.073049 | 0.147022  |
| 35 | -1.542738 | -2.09066 | -0.793647 |
| 6  | -0.19052  | 1.47435  | -1.894386 |

|   |           |           |           |
|---|-----------|-----------|-----------|
| 1 | -0.481294 | 0.446807  | -2.142428 |
| 1 | -0.814993 | 1.898584  | -1.095996 |
| 1 | -0.383308 | 2.07887   | -2.786159 |
| 6 | 1.705571  | 3.102829  | -0.503283 |
| 1 | 0.964656  | 3.132315  | 0.300588  |
| 1 | 2.70725   | 3.216324  | -0.078726 |
| 1 | 1.527364  | 3.954116  | -1.168528 |
| 6 | 1.927044  | 0.206853  | -0.259215 |
| 6 | 1.159111  | -0.135906 | 0.863917  |
| 6 | 3.082615  | -0.566682 | -0.482789 |
| 6 | 1.503601  | -1.180742 | 1.717853  |
| 6 | 3.459539  | -1.603327 | 0.372147  |
| 1 | 3.693849  | -0.339298 | -1.351503 |
| 6 | 2.660043  | -1.920444 | 1.470703  |
| 1 | 0.857769  | -1.431995 | 2.553352  |
| 1 | 4.359228  | -2.174674 | 0.165863  |
| 1 | 2.92626   | -2.739904 | 2.130794  |
| 8 | -0.035866 | 0.574918  | 1.133887  |
| 6 | -0.042837 | 1.343872  | 2.371519  |
| 1 | 0.801836  | 2.035851  | 2.36274   |
| 1 | -0.989693 | 1.883426  | 2.386241  |
| 1 | 0.027978  | 0.672408  | 3.230047  |

**P<sub>Vb-r</sub>**

E = -767.388711      ZPVE = 0.199059      NIMAG = 0.

|    |          |           |           |
|----|----------|-----------|-----------|
| 15 | 1.725268 | -1.051852 | -0.000008 |
| 6  | 2.342391 | -0.027071 | -1.433598 |
| 1  | 1.945081 | -0.439962 | -2.365882 |

|   |           |           |           |
|---|-----------|-----------|-----------|
| 1 | 2.063682  | 1.026494  | -1.358121 |
| 1 | 3.433774  | -0.11361  | -1.468924 |
| 6 | 2.342381  | -0.027114 | 1.433617  |
| 1 | 2.063623  | 1.026443  | 1.358198  |
| 1 | 1.945112  | -0.440067 | 2.365891  |
| 1 | 3.43377   | -0.113605 | 1.468912  |
| 6 | -0.102436 | -0.71128  | -0.000007 |
| 6 | -0.731691 | 0.557709  | 0.000021  |
| 6 | -0.930857 | -1.842923 | -0.000031 |
| 6 | -2.12896  | 0.663653  | 0.000035  |
| 6 | -2.32674  | -1.750041 | -0.000025 |
| 1 | -0.459148 | -2.822041 | -0.000055 |
| 6 | -2.919453 | -0.490331 | 0.000012  |
| 1 | -2.610984 | 1.633937  | 0.000071  |
| 1 | -2.935315 | -2.648959 | -0.000044 |
| 1 | -4.001324 | -0.390877 | 0.000024  |
| 8 | 0.091501  | 1.652672  | 0.000045  |
| 6 | -0.486082 | 2.952348  | -0.000043 |
| 1 | -1.096847 | 3.119829  | 0.895721  |
| 1 | 0.353133  | 3.649446  | -0.000128 |
| 1 | -1.096911 | 3.119679  | -0.895791 |

### S.12.2 Solvent-phase reactions in manuscript

#### R1r

E = -1452.461417      ZPVE = 0.397479      NIMAG = 0.

|   |           |           |           |
|---|-----------|-----------|-----------|
| 6 | -0.837876 | 0.029861  | -0.736168 |
| 6 | -2.359499 | 1.527852  | 0.680459  |
| 6 | -3.236176 | -0.740759 | -0.13149  |



|   |           |           |           |
|---|-----------|-----------|-----------|
| 6 | -2.105449 | -0.743035 | -1.171363 |
| 6 | -3.58404  | 0.707348  | 0.24414   |
| 6 | -0.02304  | 2.440081  | -0.04472  |
| 6 | -4.460584 | -1.507019 | -0.647302 |
| 6 | 0.891175  | 2.624968  | -1.269912 |
| 6 | -0.472696 | 3.826905  | 0.451417  |
| 1 | -0.160335 | 0.052303  | -1.595751 |
| 1 | -2.678211 | 2.561625  | 0.839731  |
| 1 | -1.990318 | 1.162908  | 1.644914  |
| 1 | -2.876632 | -1.250996 | 0.773377  |
| 1 | -1.852347 | -1.765803 | -1.462015 |
| 1 | -2.466405 | -0.245927 | -2.083562 |
| 1 | -4.335412 | 0.715905  | 1.043806  |
| 1 | -4.050379 | 1.192036  | -0.62746  |
| 1 | 0.570698  | 1.991734  | 0.763168  |
| 1 | -4.210478 | -2.548442 | -0.879759 |
| 1 | -5.263104 | -1.512759 | 0.09887   |
| 1 | -4.856346 | -1.044459 | -1.560477 |
| 1 | 0.339987  | 3.105629  | -2.088186 |
| 1 | 1.741398  | 3.268181  | -1.019227 |
| 1 | 1.298771  | 1.68369   | -1.64641  |
| 1 | -1.156086 | 4.300488  | -0.265182 |
| 1 | 0.397392  | 4.48297   | 0.561898  |
| 1 | -0.975268 | 3.782725  | 1.421093  |
| 6 | 1.941365  | -0.550256 | 0.162463  |
| 6 | 2.792791  | -0.012452 | 1.139928  |
| 6 | 2.456096  | -0.862251 | -1.107718 |
| 6 | 4.137741  | 0.22682   | 0.842853  |
| 1 | 2.409866  | 0.218424  | 2.127871  |
| 6 | 3.800356  | -0.629548 | -1.396567 |

|    |           |           |           |
|----|-----------|-----------|-----------|
| 1  | 1.817782  | -1.300532 | -1.869188 |
| 6  | 4.642399  | -0.080346 | -0.422651 |
| 1  | 4.788269  | 0.64686   | 1.603805  |
| 1  | 4.190297  | -0.877699 | -2.378963 |
| 1  | 5.688584  | 0.101166  | -0.649934 |
| 17 | -0.007716 | -2.881796 | 0.085132  |
| 6  | -1.22433  | 1.503906  | -0.365947 |
| 1  | -1.658849 | 1.889969  | -1.303205 |
| 15 | 0.187343  | -0.852915 | 0.589013  |
| 5  | -0.174648 | -0.685254 | 2.496669  |
| 1  | 0.634737  | -1.426299 | 3.006241  |
| 1  | 0.01754   | 0.482004  | 2.756096  |
| 1  | -1.320276 | -1.027622 | 2.658131  |

### R1u

E = -1143.972958    ZPVE = 0.278142    NIMAG = 0.

|    |           |           |           |
|----|-----------|-----------|-----------|
| 15 | 0.003364  | 0.313694  | 0.45966   |
| 17 | -0.031072 | 2.14398   | -0.562527 |
| 6  | -1.600321 | -0.518228 | -0.144581 |
| 6  | -1.570964 | -2.006402 | 0.270863  |
| 1  | -2.563358 | -2.431269 | 0.081787  |
| 1  | -0.852395 | -2.586689 | -0.313364 |
| 1  | -1.352406 | -2.138103 | 1.334293  |
| 6  | -1.838252 | -0.402276 | -1.662408 |
| 1  | -2.79889  | -0.87808  | -1.890964 |
| 1  | -1.898363 | 0.638716  | -1.988194 |
| 1  | -1.072787 | -0.906552 | -2.253425 |
| 6  | -2.757616 | 0.1893    | 0.597758  |

|   |           |           |           |
|---|-----------|-----------|-----------|
| 1 | -3.701301 | -0.257662 | 0.264974  |
| 1 | -2.684921 | 0.067588  | 1.680394  |
| 1 | -2.79615  | 1.258913  | 0.371563  |
| 6 | 1.607971  | -0.501133 | -0.159229 |
| 6 | 1.550272  | -0.950503 | -1.629436 |
| 1 | 2.545955  | -1.302697 | -1.922917 |
| 1 | 0.854374  | -1.778274 | -1.784696 |
| 1 | 1.279268  | -0.130017 | -2.300191 |
| 6 | 2.753017  | 0.523926  | 0.011827  |
| 1 | 2.805282  | 0.918129  | 1.029679  |
| 1 | 3.698502  | 0.012836  | -0.201797 |
| 1 | 2.65998   | 1.361382  | -0.683278 |
| 6 | 1.893802  | -1.711426 | 0.762385  |
| 1 | 1.987963  | -1.410698 | 1.808536  |
| 1 | 1.130551  | -2.489175 | 0.69282   |
| 1 | 2.845998  | -2.155989 | 0.451162  |
| 5 | 0.020453  | 0.649275  | 2.380094  |
| 1 | -0.847273 | 1.461477  | 2.59406   |
| 1 | 1.130473  | 1.044627  | 2.649564  |
| 1 | -0.22245  | -0.437448 | 2.86451   |

### **R1m**

E = -1291.571049      ZPVE = 0.215171      NIMAG = 0.

|   |           |           |           |
|---|-----------|-----------|-----------|
| 6 | -1.486432 | 0.070549  | 0.120339  |
| 6 | -2.316933 | -0.065502 | 1.245007  |
| 6 | -1.858001 | -0.526376 | -1.096697 |
| 6 | -3.499045 | -0.805444 | 1.153998  |
| 1 | -2.044723 | 0.403167  | 2.184376  |

|    |           |           |           |
|----|-----------|-----------|-----------|
| 6  | -3.042533 | -1.258075 | -1.181324 |
| 1  | -1.234907 | -0.412536 | -1.97794  |
| 6  | -3.862538 | -1.400656 | -0.05621  |
| 1  | -4.136368 | -0.90704  | 2.026848  |
| 1  | -3.326056 | -1.713687 | -2.125013 |
| 1  | -4.784647 | -1.969668 | -0.126442 |
| 17 | 0.151756  | 2.146437  | -1.461632 |
| 15 | 0.051538  | 1.027774  | 0.311143  |
| 6  | 1.456569  | -0.125513 | 0.154072  |
| 6  | 2.755412  | 0.39818   | 0.288957  |
| 6  | 1.281562  | -1.504401 | -0.04117  |
| 6  | 3.861541  | -0.447587 | 0.213953  |
| 1  | 2.902873  | 1.461206  | 0.450841  |
| 6  | 2.394619  | -2.347045 | -0.107023 |
| 1  | 0.28735   | -1.926138 | -0.134866 |
| 6  | 3.68281   | -1.8214   | 0.016614  |
| 1  | 4.86078   | -0.03554  | 0.314905  |
| 1  | 2.251017  | -3.412924 | -0.25493  |
| 1  | 4.545386  | -2.478692 | -0.037216 |
| 5  | 0.133189  | 2.196235  | 1.853204  |
| 1  | -0.837878 | 2.912195  | 1.787513  |
| 1  | 1.18929   | 2.776444  | 1.760916  |
| 1  | 0.106824  | 1.41561   | 2.782479  |

**R1v**

E = -1099.830918    ZPVE = 0.161713    NIMAG = 0.

|    |           |           |          |
|----|-----------|-----------|----------|
| 17 | -1.999513 | -0.906393 | 1.263111 |
| 15 | -1.217332 | 0.295874  | -0.26514 |

|   |           |           |           |
|---|-----------|-----------|-----------|
| 6 | -1.724146 | -0.616948 | -1.762847 |
| 1 | -1.299789 | -0.098288 | -2.62775  |
| 1 | -1.376789 | -1.651405 | -1.750423 |
| 1 | -2.813988 | -0.596237 | -1.832163 |
| 5 | -1.894905 | 2.102052  | -0.171928 |
| 1 | -3.093099 | 1.985178  | -0.287482 |
| 1 | -1.372117 | 2.615488  | -1.141787 |
| 1 | -1.541182 | 2.58265   | 0.87819   |
| 6 | 0.584538  | 0.096685  | -0.109334 |
| 6 | 1.348773  | 1.214098  | 0.2644    |
| 6 | 1.222154  | -1.131293 | -0.358067 |
| 6 | 2.736879  | 1.104188  | 0.38061   |
| 1 | 0.862904  | 2.163957  | 0.460039  |
| 6 | 2.607651  | -1.235199 | -0.237618 |
| 1 | 0.646948  | -2.00867  | -0.636501 |
| 6 | 3.366046  | -0.117642 | 0.130063  |
| 1 | 3.322436  | 1.972272  | 0.66687   |
| 1 | 3.094821  | -2.18604  | -0.430157 |
| 1 | 4.444713  | -0.201921 | 0.221761  |

**R1v**

E = -908.089378      ZPVE = 0.107757      NIMAG = 0.

|    |           |           |           |
|----|-----------|-----------|-----------|
| 17 | 1.718488  | -0.136987 | 0         |
| 15 | -0.352936 | 0.125499  | 0         |
| 6  | -0.879213 | -0.841665 | -1.455906 |
| 1  | -0.4853   | -0.377393 | -2.362536 |
| 1  | -0.533963 | -1.87544  | -1.385905 |
| 1  | -1.972852 | -0.821829 | -1.494608 |

|   |           |           |           |
|---|-----------|-----------|-----------|
| 6 | -0.879213 | -0.841665 | 1.455906  |
| 1 | -0.533963 | -1.87544  | 1.385905  |
| 1 | -0.4853   | -0.377393 | 2.362536  |
| 1 | -1.972852 | -0.821829 | 1.494608  |
| 5 | -0.879213 | 1.979121  | 0         |
| 1 | -0.44888  | 2.467586  | 1.018923  |
| 1 | -2.091645 | 1.864802  | 0         |
| 1 | -0.44888  | 2.467586  | -1.018923 |

**Nucleophile a**

E = -2851.146200    ZPVE = 0.064205    NIMAG = 0.

|    |           |           |           |
|----|-----------|-----------|-----------|
| 6  | -2.711903 | -0.615568 | 0.000121  |
| 1  | -2.9213   | -1.251697 | -0.873882 |
| 1  | -2.9204   | -1.250732 | 0.875066  |
| 6  | -3.674219 | 0.589763  | 0.000033  |
| 1  | -3.528611 | 1.229698  | 0.879833  |
| 1  | -3.530466 | 1.227995  | -0.881304 |
| 1  | -4.734477 | 0.289905  | 0.001444  |
| 12 | -0.630616 | -0.200615 | -0.000312 |
| 35 | 1.814839  | 0.066201  | 0.000047  |

**Nucleophile b**

E = -3118.124328    ZPVE = 0.123227    NIMAG = 0.

|    |           |           |           |
|----|-----------|-----------|-----------|
| 12 | -0.79966  | -0.447012 | 0.000299  |
| 35 | -3.228796 | -0.244675 | -0.000124 |
| 6  | 1.277319  | -0.913849 | 0.00026   |

|   |           |           |           |
|---|-----------|-----------|-----------|
| 6 | 1.697436  | 0.423333  | 0.000169  |
| 6 | 2.304543  | -1.86552  | 0.000086  |
| 6 | 3.02282   | 0.852363  | -0.000106 |
| 6 | 3.661505  | -1.492494 | -0.000176 |
| 1 | 2.062846  | -2.927585 | 0.000136  |
| 6 | 4.014661  | -0.141554 | -0.000283 |
| 1 | 3.298816  | 1.901666  | -0.000196 |
| 1 | 4.437642  | -2.253558 | -0.000319 |
| 1 | 5.060815  | 0.151855  | -0.000514 |
| 8 | 0.589837  | 1.297015  | 0.000369  |
| 6 | 0.78446   | 2.715102  | -0.000077 |
| 1 | 1.329122  | 3.027247  | -0.896928 |
| 1 | -0.210343 | 3.160018  | 0.000146  |
| 1 | 1.329731  | 3.027734  | 0.896232  |

### MgClBr

E = -3232.208677    ZPVE = 0.001644    NIMAG = 0.

|    |           |           |   |
|----|-----------|-----------|---|
| 17 | 0.02211   | -3.00732  | 0 |
| 12 | 0         | -0.723316 | 0 |
| 35 | -0.010739 | 1.708692  | 0 |

### R11 + a S<sub>N</sub>2@P-b pathways in THF

#### RC<sub>1a-i</sub>

E = -4303.612900    ZPVE = 0.464086    NIMAG = 0.

|   |           |           |          |
|---|-----------|-----------|----------|
| 6 | -2.485353 | -0.551386 | 0.015199 |
| 6 | -1.538608 | -1.92649  | 1.960197 |

|   |           |           |           |
|---|-----------|-----------|-----------|
| 6 | -2.333236 | -3.135012 | -0.153727 |
| 6 | -3.102997 | -1.860301 | -0.531451 |
| 6 | -2.16357  | -3.200873 | 1.371425  |
| 6 | -1.831761 | 0.653501  | 2.266481  |
| 6 | -3.035037 | -4.382634 | -0.704468 |
| 6 | -2.843822 | 1.799896  | 2.085723  |
| 6 | -1.568299 | 0.455836  | 3.770722  |
| 1 | -3.186908 | 0.258727  | -0.209628 |
| 1 | -1.524454 | -2.019417 | 3.049323  |
| 1 | -0.493946 | -1.847393 | 1.641466  |
| 1 | -1.332684 | -3.085131 | -0.606902 |
| 1 | -3.2404   | -1.799697 | -1.614127 |
| 1 | -4.11215  | -1.918132 | -0.09891  |
| 1 | -1.550357 | -4.06933  | 1.641925  |
| 1 | -3.15199  | -3.361459 | 1.828317  |
| 1 | -0.877921 | 0.96365   | 1.818078  |
| 1 | -3.122234 | -4.342312 | -1.796089 |
| 1 | -2.479987 | -5.290882 | -0.444912 |
| 1 | -4.046339 | -4.47816  | -0.289345 |
| 1 | -3.80228  | 1.539254  | 2.551972  |
| 1 | -2.476975 | 2.712413  | 2.567002  |
| 1 | -3.035266 | 2.042785  | 1.037587  |
| 1 | -2.455321 | 0.05421   | 4.276963  |
| 1 | -1.328575 | 1.417846  | 4.235709  |
| 1 | -0.73129  | -0.219541 | 3.965424  |
| 6 | -1.010098 | 1.830551  | -1.025094 |
| 6 | 0.0185    | 2.605067  | -0.467927 |
| 6 | -2.082393 | 2.463116  | -1.67822  |
| 6 | -0.030983 | 3.999056  | -0.55557  |
| 1 | 0.851567  | 2.134654  | 0.04314   |



|    |           |           |           |
|----|-----------|-----------|-----------|
| 6  | -2.121937 | 3.853813  | -1.768738 |
| 1  | -2.877919 | 1.877657  | -2.129594 |
| 6  | -1.098124 | 4.623587  | -1.204415 |
| 1  | 0.766918  | 4.591178  | -0.118771 |
| 1  | -2.949404 | 4.335558  | -2.280108 |
| 1  | -1.131535 | 5.706398  | -1.276175 |
| 17 | -1.226861 | -0.582074 | -2.867849 |
| 6  | -2.318129 | -0.651384 | 1.57126   |
| 1  | -3.352879 | -0.804654 | 1.919539  |
| 6  | 3.131138  | 1.725946  | 1.807052  |
| 1  | 3.568141  | 1.376182  | 2.757458  |
| 1  | 2.084598  | 1.965666  | 2.055288  |
| 6  | 3.860229  | 3.013658  | 1.368425  |
| 1  | 3.822318  | 3.818041  | 2.121075  |
| 1  | 4.922727  | 2.826951  | 1.164218  |
| 1  | 3.436399  | 3.429812  | 0.444466  |
| 15 | -0.926773 | 0.012658  | -0.893786 |
| 12 | 3.155882  | 0.057807  | 0.480548  |
| 35 | 4.52851   | -1.744078 | -0.506128 |
| 5  | 0.823538  | -0.66605  | -0.396697 |
| 1  | 1.601962  | -0.114193 | -1.151748 |
| 1  | 0.995849  | -0.353615 | 0.764052  |
| 1  | 0.809304  | -1.858078 | -0.536325 |

**TS<sub>1a-i</sub>**

E = -4303.567878    ZPVE = 0.465795    NIMAG = 1.

|   |           |          |           |
|---|-----------|----------|-----------|
| 6 | 0.769469  | 1.788535 | -0.358329 |
| 6 | -1.096712 | 2.233409 | 1.371869  |

|   |           |           |           |
|---|-----------|-----------|-----------|
| 6 | -1.602704 | 2.654773  | -1.083282 |
| 6 | -0.092069 | 2.591611  | -1.379873 |
| 6 | -1.86175  | 3.098989  | 0.3614    |
| 6 | 1.37941   | 1.770827  | 2.211769  |
| 6 | -2.307034 | 3.559812  | -2.102691 |
| 6 | 2.724089  | 2.520678  | 2.135261  |
| 6 | 0.802991  | 1.918941  | 3.629959  |
| 1 | 1.811767  | 2.058273  | -0.540158 |
| 1 | -1.287849 | 2.613943  | 2.378487  |
| 1 | -1.484803 | 1.212175  | 1.345475  |
| 1 | -2.02678  | 1.647925  | -1.191913 |
| 1 | 0.07642   | 2.233534  | -2.398731 |
| 1 | 0.303915  | 3.616794  | -1.358901 |
| 1 | -2.937557 | 3.0613    | 0.573402  |
| 1 | -1.554779 | 4.149407  | 0.478092  |
| 1 | 1.585696  | 0.705857  | 2.07028   |
| 1 | -2.151078 | 3.203578  | -3.127269 |
| 1 | -3.386524 | 3.591732  | -1.918205 |
| 1 | -1.925493 | 4.586783  | -2.04303  |
| 1 | 2.586689  | 3.575999  | 2.400801  |
| 1 | 3.450446  | 2.092638  | 2.834487  |
| 1 | 3.172066  | 2.494153  | 1.135998  |
| 1 | 0.537395  | 2.960396  | 3.848694  |
| 1 | 1.551998  | 1.608748  | 4.366679  |
| 1 | -0.086915 | 1.301656  | 3.782465  |
| 6 | 2.157608  | -1.163328 | -0.3953   |
| 6 | 2.142199  | -2.493324 | -0.844894 |
| 6 | 3.223088  | -0.723193 | 0.402787  |
| 6 | 3.165241  | -3.37198  | -0.48095  |
| 1 | 1.343241  | -2.85103  | -1.484039 |

|    |           |           |           |
|----|-----------|-----------|-----------|
| 6  | 4.236592  | -1.609064 | 0.774022  |
| 1  | 3.287616  | 0.308176  | 0.723676  |
| 6  | 4.211274  | -2.935964 | 0.335435  |
| 1  | 3.138893  | -4.397234 | -0.837442 |
| 1  | 5.05243   | -1.254378 | 1.396495  |
| 1  | 5.003146  | -3.621276 | 0.621745  |
| 17 | 2.295094  | 0.686993  | -2.702694 |
| 6  | 0.418165  | 2.266203  | 1.086281  |
| 1  | 0.645947  | 3.342507  | 0.999198  |
| 6  | -0.446737 | -1.147689 | 1.146795  |
| 1  | -1.322724 | -0.716168 | 1.658856  |
| 1  | 0.390978  | -0.605156 | 1.568944  |
| 6  | -0.319521 | -2.638146 | 1.523643  |
| 1  | -0.219172 | -2.759553 | 2.611699  |
| 1  | -1.195214 | -3.236909 | 1.237467  |
| 1  | 0.556516  | -3.104072 | 1.064985  |
| 15 | 0.840088  | -0.039899 | -0.994113 |
| 12 | -1.893918 | -1.380954 | -0.494676 |
| 35 | -4.113684 | -1.87698  | 0.38374   |
| 5  | -0.503293 | -0.768338 | -2.273853 |
| 1  | -0.610477 | -1.955114 | -2.014361 |
| 1  | -1.531661 | -0.153032 | -2.042237 |
| 1  | -0.191227 | -0.611157 | -3.413071 |

**PC<sub>1a-i</sub>**

E = -4303.652421    ZPVE = 0.469047    NIMAG = 0.

|   |          |           |           |
|---|----------|-----------|-----------|
| 6 | 1.457873 | -0.956461 | 0.378345  |
| 6 | 1.777024 | -2.759416 | -1.445778 |

|   |           |           |           |
|---|-----------|-----------|-----------|
| 6 | 0.027732  | -3.12537  | 0.384208  |
| 6 | 0.726413  | -2.037463 | 1.215837  |
| 6 | 1.040338  | -3.780992 | -0.565898 |
| 6 | 3.378239  | -0.66139  | -1.397144 |
| 6 | -0.654765 | -4.158047 | 1.290205  |
| 6 | 4.616416  | -0.307249 | -0.551205 |
| 6 | 3.840131  | -1.166448 | -2.775667 |
| 1 | 2.039995  | -0.367786 | 1.099474  |
| 1 | 2.544207  | -3.286069 | -2.021169 |
| 1 | 1.083557  | -2.341796 | -2.182747 |
| 1 | -0.755247 | -2.653149 | -0.229231 |
| 1 | 0.025079  | -1.573054 | 1.914112  |
| 1 | 1.495645  | -2.513772 | 1.838338  |
| 1 | 0.535011  | -4.520061 | -1.200509 |
| 1 | 1.776095  | -4.334974 | 0.03574   |
| 1 | 2.823718  | 0.268527  | -1.578564 |
| 1 | -1.399144 | -3.687471 | 1.94287   |
| 1 | -1.163061 | -4.927911 | 0.698728  |
| 1 | 0.080262  | -4.658951 | 1.931957  |
| 1 | 5.28569   | -1.174231 | -0.488142 |
| 1 | 5.179157  | 0.517932  | -1.001562 |
| 1 | 4.360376  | -0.025426 | 0.474704  |
| 1 | 4.429344  | -2.086827 | -2.68943  |
| 1 | 4.479233  | -0.411539 | -3.246689 |
| 1 | 3.004983  | -1.363096 | -3.455175 |
| 6 | 0.920632  | 2.023241  | -0.127341 |
| 6 | 0.081283  | 3.114453  | -0.426321 |
| 6 | 2.226848  | 2.278572  | 0.314494  |
| 6 | 0.555099  | 4.42299   | -0.325902 |
| 1 | -0.95046  | 2.956094  | -0.717495 |

|    |           |           |           |
|----|-----------|-----------|-----------|
| 6  | 2.694201  | 3.591692  | 0.423815  |
| 1  | 2.883825  | 1.472126  | 0.609335  |
| 6  | 1.866328  | 4.665684  | 0.094522  |
| 1  | -0.105199 | 5.250544  | -0.567121 |
| 1  | 3.70546   | 3.766457  | 0.777433  |
| 1  | 2.232726  | 5.684344  | 0.17859   |
| 17 | 3.348575  | 0.202903  | 3.497008  |
| 6  | 2.455501  | -1.650597 | -0.610294 |
| 1  | 3.123902  | -2.192309 | 0.076459  |
| 6  | -0.139978 | 0.017768  | -2.082142 |
| 1  | -0.580073 | -0.983556 | -2.109023 |
| 1  | 0.812348  | -0.033281 | -2.615634 |
| 6  | -1.079743 | 1.011559  | -2.777686 |
| 1  | -1.28565  | 0.647504  | -3.788982 |
| 1  | -2.038091 | 1.108136  | -2.260031 |
| 1  | -0.630595 | 2.002786  | -2.869161 |
| 15 | 0.234395  | 0.323707  | -0.288436 |
| 12 | -3.651438 | 0.135708  | 1.168436  |
| 35 | -5.773039 | 0.112826  | -0.006402 |
| 5  | -1.41152  | 0.306112  | 0.73506   |
| 1  | -2.111182 | 1.203224  | 0.286086  |
| 1  | -1.944506 | -0.788145 | 0.561084  |
| 1  | -1.185311 | 0.497668  | 1.904408  |

**P1a-i**

E = -1071.481311    ZPVE = 0.462313    NIMAG = 0.

|   |           |          |           |
|---|-----------|----------|-----------|
| 6 | -0.903051 | 0.105643 | -0.855895 |
| 6 | -2.371276 | 1.362078 | 0.831449  |

|   |           |           |           |
|---|-----------|-----------|-----------|
| 6 | -3.300809 | -0.72709  | -0.335161 |
| 6 | -2.193976 | -0.566327 | -1.388694 |
| 6 | -3.617086 | 0.636602  | 0.29686   |
| 6 | -0.046174 | 2.362006  | 0.204397  |
| 6 | -4.551615 | -1.376843 | -0.94035  |
| 6 | 0.860356  | 2.706663  | -0.991655 |
| 6 | -0.473417 | 3.671582  | 0.894275  |
| 1 | -0.263719 | 0.281995  | -1.729537 |
| 1 | -2.673541 | 2.359064  | 1.164049  |
| 1 | -1.992102 | 0.847823  | 1.722168  |
| 1 | -2.930907 | -1.397614 | 0.454582  |
| 1 | -1.958868 | -1.532946 | -1.841651 |
| 1 | -2.577135 | 0.074319  | -2.197002 |
| 1 | -4.35009  | 0.516358  | 1.10499   |
| 1 | -4.096042 | 1.269813  | -0.465513 |
| 1 | 0.550724  | 1.795868  | 0.930529  |
| 1 | -4.324067 | -2.364617 | -1.356556 |
| 1 | -5.336517 | -1.501668 | -0.185529 |
| 1 | -4.960692 | -0.757619 | -1.748829 |
| 1 | 0.304648  | 3.292402  | -1.735158 |
| 1 | 1.71396   | 3.309826  | -0.664341 |
| 1 | 1.262003  | 1.821716  | -1.490709 |
| 1 | -1.157213 | 4.248205  | 0.258032  |
| 1 | 0.405219  | 4.297062  | 1.086095  |
| 1 | -0.968679 | 3.500783  | 1.854007  |
| 6 | 1.918491  | -0.608347 | -0.137034 |
| 6 | 2.540392  | -0.875607 | -1.369406 |
| 6 | 2.66568   | 0.019736  | 0.871398  |
| 6 | 3.867926  | -0.504148 | -1.593798 |
| 1 | 1.98936   | -1.384005 | -2.154519 |

|    |           |           |           |
|----|-----------|-----------|-----------|
| 6  | 3.997481  | 0.382101  | 0.650418  |
| 1  | 2.222445  | 0.234022  | 1.838066  |
| 6  | 4.600905  | 0.125638  | -0.583539 |
| 1  | 4.330077  | -0.715509 | -2.55357  |
| 1  | 4.560177  | 0.865034  | 1.443953  |
| 1  | 5.63527   | 0.408855  | -0.75446  |
| 6  | -1.259257 | 1.494033  | -0.232869 |
| 1  | -1.718984 | 2.040302  | -1.074604 |
| 6  | -0.159767 | -1.126468 | 1.903468  |
| 1  | -1.236505 | -1.286501 | 2.010185  |
| 1  | 0.050819  | -0.132006 | 2.307771  |
| 6  | 0.597503  | -2.210225 | 2.687658  |
| 1  | 0.34159   | -2.13595  | 3.749592  |
| 1  | 0.326947  | -3.2099   | 2.340251  |
| 1  | 1.681993  | -2.104592 | 2.595819  |
| 15 | 0.170726  | -1.151319 | 0.079658  |
| 5  | -0.041129 | -2.956448 | -0.649945 |
| 1  | 0.847659  | -3.610174 | -0.146726 |
| 1  | -1.14606  | -3.33588  | -0.320962 |
| 1  | 0.079135  | -2.868599 | -1.854706 |

**R1<sub>II</sub> + a S<sub>N</sub>2@P-b pathways in THF**

**RC<sub>IIa-i</sub>**

E = -3995.124880      ZPVE = 0.344370      NIMAG = 0.

|    |           |           |           |
|----|-----------|-----------|-----------|
| 17 | -2.24199  | -1.118657 | -2.008506 |
| 6  | -2.037175 | 1.572017  | -0.408203 |
| 6  | -1.317696 | 2.343431  | 0.723079  |
| 1  | -1.53323  | 3.409531  | 0.59142   |
| 1  | -1.664157 | 2.060608  | 1.718774  |

|    |           |           |           |
|----|-----------|-----------|-----------|
| 1  | -0.233125 | 2.218367  | 0.682906  |
| 6  | -3.554169 | 1.822328  | -0.346843 |
| 1  | -3.736541 | 2.87976   | -0.568548 |
| 1  | -4.100859 | 1.230379  | -1.08638  |
| 1  | -3.96792  | 1.622177  | 0.644189  |
| 6  | -1.492195 | 2.065783  | -1.768417 |
| 1  | -1.643861 | 3.149562  | -1.81643  |
| 1  | -0.422531 | 1.87315   | -1.883104 |
| 1  | -2.020958 | 1.615095  | -2.611007 |
| 6  | 2.696043  | 3.67352   | 0.155988  |
| 1  | 1.769547  | 3.666724  | -0.433815 |
| 1  | 3.52287   | 3.612924  | -0.563949 |
| 1  | 2.760583  | 4.669196  | 0.624597  |
| 6  | 2.739211  | 2.513651  | 1.173554  |
| 1  | 3.670024  | 2.586089  | 1.759396  |
| 1  | 1.930869  | 2.648533  | 1.910572  |
| 12 | 2.636491  | 0.528462  | 0.398437  |
| 35 | 3.988401  | -1.445891 | -0.271049 |
| 6  | -2.522339 | -1.233737 | 1.098375  |
| 6  | -4.020129 | -1.405515 | 0.779915  |
| 1  | -4.468052 | -1.999654 | 1.584249  |
| 1  | -4.557515 | -0.457692 | 0.732414  |
| 1  | -4.179524 | -1.94362  | -0.157287 |
| 6  | -2.347005 | -0.513094 | 2.45373   |
| 1  | -2.739634 | -1.169526 | 3.237965  |
| 1  | -1.297992 | -0.312582 | 2.690109  |
| 1  | -2.907428 | 0.423608  | 2.501813  |
| 6  | -1.862345 | -2.629966 | 1.176876  |
| 1  | -0.817481 | -2.576312 | 1.489413  |
| 1  | -2.410193 | -3.220641 | 1.919366  |



|    |           |           |           |
|----|-----------|-----------|-----------|
| 1  | -1.912185 | -3.163086 | 0.223245  |
| 15 | -1.574851 | -0.261014 | -0.233385 |
| 5  | 0.343825  | -0.58828  | -0.142376 |
| 1  | 0.869334  | 0.148189  | -0.952747 |
| 1  | 0.666458  | -0.339537 | 1.006614  |
| 1  | 0.515845  | -1.743345 | -0.409371 |

**TS<sub>IIa-i</sub>**

E = -3995.059658      ZPVE = 0.349108      NIMAG = 1.

|    |           |           |           |
|----|-----------|-----------|-----------|
| 17 | 2.561321  | -1.823087 | -1.426435 |
| 6  | 1.241104  | -1.161077 | 1.352936  |
| 6  | 0.5135    | -0.481562 | 2.523016  |
| 1  | 0.66867   | -1.101469 | 3.413774  |
| 1  | 0.904688  | 0.512392  | 2.74159   |
| 1  | -0.5616   | -0.410161 | 2.358272  |
| 6  | 2.709807  | -1.375007 | 1.779113  |
| 1  | 2.702254  | -2.014094 | 2.669719  |
| 1  | 3.300151  | -1.870275 | 1.01019   |
| 1  | 3.197582  | -0.438988 | 2.060703  |
| 6  | 0.573009  | -2.527958 | 1.100188  |
| 1  | 0.648064  | -3.111581 | 2.025169  |
| 1  | -0.490513 | -2.434362 | 0.866809  |
| 1  | 1.05888   | -3.085723 | 0.30024   |
| 6  | -1.146769 | 2.159332  | 1.793812  |
| 1  | -0.342032 | 2.246992  | 2.52773   |
| 1  | -1.908534 | 1.508865  | 2.237409  |
| 1  | -1.599063 | 3.155776  | 1.693032  |
| 6  | -0.620882 | 1.67412   | 0.429997  |

|    |           |           |           |
|----|-----------|-----------|-----------|
| 1  | -1.349738 | 1.976198  | -0.356422 |
| 1  | 0.189653  | 2.321674  | 0.124216  |
| 12 | -1.96462  | 0.040937  | -0.385452 |
| 35 | -4.378464 | -0.189353 | -0.326849 |
| 6  | 2.463784  | 1.339641  | -0.469262 |
| 6  | 3.894886  | 0.835328  | -0.764945 |
| 1  | 4.544407  | 1.718732  | -0.770572 |
| 1  | 4.269594  | 0.14843   | -0.005644 |
| 1  | 3.969821  | 0.347787  | -1.734764 |
| 6  | 2.570215  | 2.192131  | 0.818057  |
| 1  | 3.26201   | 3.016155  | 0.610756  |
| 1  | 1.637159  | 2.636685  | 1.158544  |
| 1  | 2.994529  | 1.618101  | 1.645017  |
| 6  | 2.020928  | 2.186056  | -1.684104 |
| 1  | 1.050492  | 2.670023  | -1.561523 |
| 1  | 2.765125  | 2.975843  | -1.838195 |
| 1  | 1.988082  | 1.580331  | -2.594291 |
| 15 | 1.145177  | -0.106743 | -0.30341  |
| 5  | -0.161173 | -0.500098 | -1.783272 |
| 1  | -0.856873 | -1.379765 | -1.280805 |
| 1  | -0.790064 | 0.515561  | -2.012353 |
| 1  | 0.337209  | -0.918907 | -2.779395 |

**PCIIa-i**

E = -3995.168846    ZPVE = 0.349229    NIMAG = 0.

|    |           |           |           |
|----|-----------|-----------|-----------|
| 17 | -5.287615 | -2.801619 | 0.115187  |
| 6  | -1.656023 | 0.206017  | -1.634367 |
| 6  | -3.007346 | 0.90572   | -1.890229 |

|    |           |           |           |
|----|-----------|-----------|-----------|
| 1  | -3.474989 | 0.43284   | -2.760682 |
| 1  | -3.704062 | 0.810894  | -1.056379 |
| 1  | -2.877313 | 1.964651  | -2.126465 |
| 6  | -1.867962 | -1.319488 | -1.542657 |
| 1  | -2.196055 | -1.675754 | -2.525617 |
| 1  | -0.944949 | -1.851408 | -1.293075 |
| 1  | -2.647312 | -1.594484 | -0.828066 |
| 6  | -0.7142   | 0.508713  | -2.823244 |
| 1  | -1.226009 | 0.208918  | -3.744425 |
| 1  | -0.475546 | 1.572661  | -2.916016 |
| 1  | 0.219891  | -0.054636 | -2.763529 |
| 6  | -1.98576  | 3.547757  | 0.188292  |
| 1  | -2.352105 | 3.410579  | 1.20766   |
| 1  | -2.809014 | 3.342039  | -0.496817 |
| 1  | -1.718887 | 4.603594  | 0.077535  |
| 6  | -0.738537 | 2.700082  | -0.103408 |
| 1  | -0.342586 | 2.937173  | -1.096841 |
| 1  | 0.05844   | 2.960904  | 0.60097   |
| 12 | 3.222303  | -0.202468 | -0.115237 |
| 35 | 5.565924  | -0.715446 | 0.043622  |
| 6  | -1.564652 | 0.25993   | 1.582559  |
| 6  | -1.157308 | -1.20568  | 1.85218   |
| 1  | -1.572435 | -1.500488 | 2.822173  |
| 1  | -1.55264  | -1.896719 | 1.106718  |
| 1  | -0.07218  | -1.326968 | 1.903852  |
| 6  | -3.103155 | 0.37187   | 1.589506  |
| 1  | -3.456707 | 0.133262  | 2.599013  |
| 1  | -3.455663 | 1.377813  | 1.349327  |
| 1  | -3.575556 | -0.343202 | 0.911685  |
| 6  | -0.970795 | 1.141949  | 2.706595  |

|    |           |           |           |
|----|-----------|-----------|-----------|
| 1  | -1.283301 | 2.186132  | 2.63679   |
| 1  | -1.33349  | 0.755907  | 3.665457  |
| 1  | 0.122087  | 1.106144  | 2.731327  |
| 15 | -0.799828 | 0.841319  | -0.058845 |
| 5  | 1.063034  | 0.311733  | -0.094688 |
| 1  | 1.616255  | 0.935841  | -0.987291 |
| 1  | 1.564835  | 0.607941  | 0.977874  |
| 1  | 1.180471  | -0.885556 | -0.292525 |

**P11a-i**

E = -762.988034      ZPVE = 0.343366      NIMAG = 0.

|   |           |           |           |
|---|-----------|-----------|-----------|
| 6 | 1.643607  | -0.333273 | -0.305577 |
| 6 | 1.879038  | 0.498254  | -1.583426 |
| 1 | 2.800657  | 0.145583  | -2.062564 |
| 1 | 1.072672  | 0.403075  | -2.31322  |
| 1 | 2.019963  | 1.558198  | -1.357482 |
| 6 | 1.685483  | -1.835946 | -0.655826 |
| 1 | 2.691548  | -2.082713 | -1.015694 |
| 1 | 1.479444  | -2.465414 | 0.214383  |
| 1 | 0.983403  | -2.097116 | -1.451759 |
| 6 | 2.79726   | -0.037125 | 0.681998  |
| 1 | 3.748046  | -0.246263 | 0.177039  |
| 1 | 2.817719  | 1.010579  | 0.997915  |
| 1 | 2.738537  | -0.661926 | 1.575381  |
| 6 | -0.448323 | 2.839522  | -0.443416 |
| 1 | -1.461524 | 2.660972  | -0.81056  |
| 1 | 0.237059  | 2.728024  | -1.285187 |
| 1 | -0.402592 | 3.88455   | -0.118034 |

|    |           |           |           |
|----|-----------|-----------|-----------|
| 6  | -0.089251 | 1.935173  | 0.745704  |
| 1  | 0.882843  | 2.228781  | 1.1573    |
| 1  | -0.804698 | 2.09653   | 1.559499  |
| 6  | -1.542078 | -0.552456 | -0.289885 |
| 6  | -1.713739 | -2.061762 | -0.003011 |
| 1  | -2.655413 | -2.39681  | -0.454672 |
| 1  | -0.911054 | -2.665832 | -0.430389 |
| 1  | -1.760898 | -2.264261 | 1.06955   |
| 6  | -1.53282  | -0.323042 | -1.814543 |
| 1  | -2.500256 | -0.64099  | -2.222492 |
| 1  | -1.3924   | 0.726686  | -2.08299  |
| 1  | -0.76166  | -0.913123 | -2.316262 |
| 6  | -2.75516  | 0.182675  | 0.329731  |
| 1  | -2.764769 | 1.250679  | 0.100248  |
| 1  | -3.672123 | -0.249882 | -0.087701 |
| 1  | -2.792661 | 0.060593  | 1.415404  |
| 15 | 0.018689  | 0.078848  | 0.610563  |
| 5  | 0.070771  | -0.600069 | 2.451955  |
| 1  | 0.849762  | 0.118615  | 3.04453   |
| 1  | -1.058969 | -0.487007 | 2.883028  |
| 1  | 0.439062  | -1.756024 | 2.426015  |

**R1<sub>III</sub> + a S<sub>N</sub>2@P-b pathways in THF**

**RC<sub>IIIa-i</sub>**

E = -4142.721673      ZPVE = 0.280763      NIMAG = 0.

|   |           |           |           |
|---|-----------|-----------|-----------|
| 6 | -2.8332   | 0.500058  | -0.32912  |
| 6 | -2.700379 | 1.895298  | -0.422146 |
| 6 | -3.997745 | -0.053905 | 0.229848  |
| 6 | -3.717427 | 2.726312  | 0.055372  |

|    |           |           |           |
|----|-----------|-----------|-----------|
| 1  | -1.810472 | 2.331062  | -0.863099 |
| 6  | -5.011358 | 0.781983  | 0.698229  |
| 1  | -4.120169 | -1.130556 | 0.290416  |
| 6  | -4.871235 | 2.172014  | 0.614369  |
| 1  | -3.608471 | 3.803759  | -0.019091 |
| 1  | -5.910041 | 0.348531  | 1.125955  |
| 1  | -5.662964 | 2.81924   | 0.979345  |
| 17 | -2.428357 | -2.089096 | -1.953574 |
| 6  | 2.393845  | 3.2901    | 1.065841  |
| 1  | 2.90442   | 3.344109  | 2.040251  |
| 1  | 1.323131  | 3.202226  | 1.305906  |
| 6  | 2.638232  | 4.597425  | 0.284691  |
| 1  | 2.11246   | 4.601741  | -0.678811 |
| 1  | 2.300763  | 5.492601  | 0.831434  |
| 1  | 3.702532  | 4.748244  | 0.062686  |
| 15 | -1.462261 | -0.528164 | -0.944042 |
| 12 | 3.021491  | 1.48154   | 0.133608  |
| 35 | 4.170034  | -0.573325 | -0.59458  |
| 6  | -0.699285 | -1.360925 | 0.48876   |
| 6  | 0.385369  | -2.224259 | 0.247945  |
| 6  | -1.121643 | -1.127106 | 1.80737   |
| 6  | 1.031789  | -2.847384 | 1.314967  |
| 1  | 0.729794  | -2.404992 | -0.765141 |
| 6  | -0.465089 | -1.751873 | 2.871259  |
| 1  | -1.949603 | -0.457605 | 2.010863  |
| 6  | 0.607445  | -2.613291 | 2.627411  |
| 1  | 1.870561  | -3.508084 | 1.121042  |
| 1  | -0.794685 | -1.563051 | 3.88833   |
| 1  | 1.114213  | -3.098306 | 3.456195  |
| 5  | -0.207721 | 0.354777  | -2.126435 |

|   |           |           |           |
|---|-----------|-----------|-----------|
| 1 | -0.860136 | 0.814009  | -3.033973 |
| 1 | 0.57648   | -0.500418 | -2.459444 |
| 1 | 0.291748  | 1.201892  | -1.411081 |

**TS<sub>IIIa-i</sub>**

E = -4142.691552    ZPVE = 0.284670    NIMAG = 1.

|    |           |           |           |
|----|-----------|-----------|-----------|
| 6  | -2.309083 | -0.687658 | 0.057119  |
| 6  | -2.45931  | -2.055723 | 0.332158  |
| 6  | -3.330258 | -0.000156 | -0.618271 |
| 6  | -3.606446 | -2.733226 | -0.088614 |
| 1  | -1.695706 | -2.594143 | 0.882318  |
| 6  | -4.467347 | -0.686417 | -1.046175 |
| 1  | -3.261967 | 1.068308  | -0.786462 |
| 6  | -4.607168 | -2.053661 | -0.786385 |
| 1  | -3.713635 | -3.790597 | 0.132869  |
| 1  | -5.250372 | -0.14722  | -1.57027  |
| 1  | -5.496833 | -2.581986 | -1.115134 |
| 17 | -2.057627 | 1.348097  | 2.278064  |
| 6  | 0.41585   | -0.984975 | -1.308609 |
| 1  | 1.276033  | -0.495118 | -1.806266 |
| 1  | -0.436415 | -0.505724 | -1.780755 |
| 6  | 0.363149  | -2.491513 | -1.636891 |
| 1  | -0.576325 | -2.933184 | -1.293064 |
| 1  | 0.426221  | -2.664636 | -2.720308 |
| 1  | 1.168964  | -3.091988 | -1.191866 |
| 15 | -0.83917  | 0.154308  | 0.727176  |
| 12 | 1.885329  | -1.065595 | 0.344288  |
| 35 | 4.299558  | -1.081348 | 0.006667  |

|   |           |           |           |
|---|-----------|-----------|-----------|
| 6 | -0.27692  | 1.687996  | -0.110569 |
| 6 | 0.629889  | 2.504527  | 0.587093  |
| 6 | -0.702072 | 2.072483  | -1.390947 |
| 6 | 1.105943  | 3.681762  | 0.008466  |
| 1 | 0.95539   | 2.237961  | 1.587201  |
| 6 | -0.232632 | 3.26026   | -1.957791 |
| 1 | -1.392291 | 1.461242  | -1.959629 |
| 6 | 0.672358  | 4.066348  | -1.26364  |
| 1 | 1.807757  | 4.300708  | 0.558791  |
| 1 | -0.576028 | 3.548563  | -2.946604 |
| 1 | 1.036579  | 4.986758  | -1.709395 |
| 5 | 0.288139  | -0.797767 | 2.047515  |
| 1 | -0.223723 | -0.838324 | 3.124055  |
| 1 | 1.312714  | -0.134283 | 2.094169  |
| 1 | 0.481946  | -1.915729 | 1.601573  |

**PCIIIa-i**

E = -4142.775149    ZPVE = 0.286463    NIMAG = 0.

|   |          |           |           |
|---|----------|-----------|-----------|
| 6 | 1.66125  | -1.397485 | -0.71944  |
| 6 | 1.415547 | -2.206925 | -1.839901 |
| 6 | 2.815991 | -1.608302 | 0.054852  |
| 6 | 2.323028 | -3.210471 | -2.190325 |
| 1 | 0.52255  | -2.06121  | -2.438543 |
| 6 | 3.715438 | -2.614897 | -0.301313 |
| 1 | 3.019925 | -1.005651 | 0.937387  |
| 6 | 3.473667 | -3.413521 | -1.423936 |
| 1 | 2.128148 | -3.831266 | -3.059547 |
| 1 | 4.603872 | -2.773688 | 0.302105  |



|    |           |           |           |
|----|-----------|-----------|-----------|
| 1  | 4.177881  | -4.19377  | -1.697128 |
| 17 | 3.417153  | 0.254634  | 3.382261  |
| 6  | 0.187334  | -0.169968 | 1.533332  |
| 1  | -0.486998 | 0.661466  | 1.770756  |
| 1  | 1.129754  | 0.016672  | 2.062415  |
| 6  | -0.413438 | -1.51208  | 1.975312  |
| 1  | 0.275177  | -2.33977  | 1.784911  |
| 1  | -0.607437 | -1.482405 | 3.051269  |
| 1  | -1.357645 | -1.735028 | 1.467862  |
| 15 | 0.49695   | -0.059254 | -0.279493 |
| 12 | -3.428258 | -0.087007 | -0.465671 |
| 35 | -5.686058 | -0.042225 | 0.363117  |
| 6  | 1.305682  | 1.550661  | -0.598525 |
| 6  | 0.934318  | 2.300267  | -1.727801 |
| 6  | 2.308348  | 2.035614  | 0.259204  |
| 6  | 1.561564  | 3.518632  | -1.998626 |
| 1  | 0.159158  | 1.941301  | -2.396374 |
| 6  | 2.926186  | 3.257657  | -0.017454 |
| 1  | 2.617184  | 1.479959  | 1.142056  |
| 6  | 2.557269  | 3.999266  | -1.143673 |
| 1  | 1.26893   | 4.090102  | -2.874325 |
| 1  | 3.696971  | 3.626934  | 0.652071  |
| 1  | 3.042178  | 4.948125  | -1.353096 |
| 5  | -1.152859 | -0.178457 | -1.301045 |
| 1  | -0.97801  | -0.184437 | -2.486039 |
| 1  | -1.75241  | 0.853601  | -0.997045 |
| 1  | -1.722764 | -1.207345 | -0.960842 |

E = -910.596380      ZPVE = 0.280050      NIMAG = 0.

|    |           |           |           |
|----|-----------|-----------|-----------|
| 6  | 1.350871  | -0.219109 | 0.078893  |
| 6  | 2.409796  | -0.353074 | 0.989095  |
| 6  | 1.341589  | -1.005406 | -1.086152 |
| 6  | 3.44653   | -1.257571 | 0.736442  |
| 1  | 2.423416  | 0.247145  | 1.89284   |
| 6  | 2.377579  | -1.906637 | -1.336331 |
| 1  | 0.523148  | -0.924538 | -1.796137 |
| 6  | 3.4324    | -2.033488 | -0.424986 |
| 1  | 4.260826  | -1.354759 | 1.448318  |
| 1  | 2.360471  | -2.510804 | -2.238564 |
| 1  | 4.236713  | -2.736713 | -0.619947 |
| 6  | 0.130398  | 2.239326  | -0.947826 |
| 1  | -0.717628 | 2.920906  | -0.820365 |
| 1  | 0.001329  | 1.72397   | -1.905406 |
| 6  | 1.44743   | 3.028711  | -0.936098 |
| 1  | 2.311293  | 2.372086  | -1.076629 |
| 1  | 1.444396  | 3.757859  | -1.752211 |
| 1  | 1.580575  | 3.571316  | 0.003489  |
| 15 | 0.015284  | 0.995215  | 0.416198  |
| 6  | -1.548295 | 0.072983  | 0.138437  |
| 6  | -1.817928 | -1.037156 | 0.958478  |
| 6  | -2.499017 | 0.459291  | -0.818253 |
| 6  | -3.008906 | -1.749953 | 0.81651   |
| 1  | -1.097064 | -1.346549 | 1.70975   |
| 6  | -3.694347 | -0.254845 | -0.955855 |
| 1  | -2.323803 | 1.314234  | -1.462135 |
| 6  | -3.951101 | -1.359777 | -0.141678 |
| 1  | -3.202209 | -2.606494 | 1.455407  |

|   |           |           |           |
|---|-----------|-----------|-----------|
| 1 | -4.421041 | 0.05584   | -1.700662 |
| 1 | -4.879146 | -1.913148 | -0.250101 |
| 5 | 0.095044  | 1.792548  | 2.192609  |
| 1 | -0.031683 | 0.881688  | 2.98317   |
| 1 | -0.842137 | 2.564346  | 2.212564  |
| 1 | 1.166074  | 2.352902  | 2.286546  |

**R1<sub>IV</sub> + a S<sub>N</sub>2@P-b pathways in THF**

**RC<sub>IVa-i</sub>**

E = -3950.980038      ZPVE = 0.228001      NIMAG = 0.

|    |              |              |              |
|----|--------------|--------------|--------------|
| 17 | 2.061628000  | 2.398806000  | -1.722525000 |
| 15 | 1.614735000  | 1.471655000  | 0.088551000  |
| 6  | 2.225246000  | 2.665067000  | 1.319950000  |
| 1  | 2.113304000  | 2.225488000  | 2.315211000  |
| 1  | 3.268010000  | 2.933987000  | 1.144512000  |
| 1  | 1.603994000  | 3.561072000  | 1.255076000  |
| 5  | -0.297933000 | 1.202622000  | 0.206629000  |
| 1  | -0.796606000 | 2.273305000  | -0.009901000 |
| 1  | -0.457086000 | 0.848498000  | 1.360995000  |
| 1  | -0.614511000 | 0.365749000  | -0.614346000 |
| 6  | 2.665906000  | -0.004794000 | 0.130323000  |
| 6  | 2.207683000  | -1.168391000 | -0.512700000 |
| 6  | 3.917869000  | -0.008162000 | 0.768295000  |
| 6  | 2.993370000  | -2.320794000 | -0.513360000 |
| 1  | 1.243397000  | -1.177349000 | -1.009794000 |
| 6  | 4.696573000  | -1.166574000 | 0.766770000  |
| 1  | 4.291782000  | 0.878941000  | 1.267344000  |
| 6  | 4.237499000  | -2.320556000 | 0.124800000  |
| 1  | 2.634031000  | -3.216232000 | -1.010331000 |

|    |              |              |             |
|----|--------------|--------------|-------------|
| 1  | 5.660905000  | -1.165261000 | 1.264817000 |
| 1  | 4.847151000  | -3.218860000 | 0.123906000 |
| 6  | -1.089656000 | -2.470357000 | 1.822260000 |
| 1  | 0.007593000  | -2.421907000 | 1.736092000 |
| 1  | -1.297803000 | -2.321973000 | 2.894930000 |
| 6  | -1.574390000 | -3.874550000 | 1.404386000 |
| 1  | -1.118844000 | -4.688084000 | 1.992465000 |
| 1  | -2.661676000 | -3.978840000 | 1.516209000 |
| 1  | -1.349820000 | -4.087012000 | 0.350480000 |
| 12 | -1.910722000 | -0.793293000 | 0.797300000 |
| 35 | -3.986294000 | 0.400097000  | 0.138759000 |

**TS<sub>IVa-i</sub>**

E = -3950.953176      ZPVE = 0.229664      NIMAG = 1.

|    |           |           |           |
|----|-----------|-----------|-----------|
| 17 | 2.71119   | 2.466475  | -0.717653 |
| 15 | 1.01993   | 1.153683  | 0.183923  |
| 6  | 1.223918  | 2.015101  | 1.796591  |
| 1  | 0.469385  | 1.713121  | 2.520371  |
| 1  | 2.223885  | 1.827543  | 2.191771  |
| 1  | 1.136006  | 3.082919  | 1.588813  |
| 5  | -0.383891 | 1.704403  | -1.093521 |
| 1  | 0.024764  | 2.421251  | -1.954569 |
| 1  | -1.192842 | 2.292643  | -0.389802 |
| 1  | -0.830203 | 0.673123  | -1.571232 |
| 6  | 1.980688  | -0.372408 | -0.06544  |
| 6  | 1.853657  | -1.04134  | -1.291974 |
| 6  | 2.862076  | -0.863972 | 0.907621  |
| 6  | 2.600704  | -2.195439 | -1.538786 |

|    |           |           |           |
|----|-----------|-----------|-----------|
| 1  | 1.184436  | -0.66565  | -2.059246 |
| 6  | 3.606599  | -2.017663 | 0.653705  |
| 1  | 2.979715  | -0.35815  | 1.860535  |
| 6  | 3.477982  | -2.68581  | -0.567969 |
| 1  | 2.4966    | -2.70615  | -2.49113  |
| 1  | 4.2879    | -2.39178  | 1.411695  |
| 1  | 4.059502  | -3.58177  | -0.762207 |
| 6  | -0.510603 | -0.453592 | 1.557265  |
| 1  | 0.411836  | -0.399902 | 2.129199  |
| 1  | -1.264226 | -0.075271 | 2.281018  |
| 6  | -0.779275 | -1.935391 | 1.217391  |
| 1  | -0.723631 | -2.56604  | 2.115166  |
| 1  | -1.770319 | -2.115559 | 0.780161  |
| 1  | -0.03935  | -2.315806 | 0.505889  |
| 12 | -1.93467  | 0.432938  | 0.116121  |
| 35 | -4.217189 | -0.299544 | -0.304327 |

**PC<sub>IVa-i</sub>**

E = -3951.030348    ZPVE = 0.233133    NIMAG = 0.

|    |              |             |              |
|----|--------------|-------------|--------------|
| 17 | 3.018813000  | 4.371145000 | -0.866151000 |
| 15 | 1.037225000  | 0.357971000 | 0.881927000  |
| 6  | 2.031832000  | 1.679662000 | 1.656172000  |
| 1  | 1.363039000  | 2.326941000 | 2.230312000  |
| 1  | 2.781463000  | 1.254607000 | 2.327662000  |
| 1  | 2.515556000  | 2.281310000 | 0.879311000  |
| 5  | -0.123232000 | 1.117567000 | -0.474562000 |
| 1  | 0.524064000  | 1.659585000 | -1.323124000 |
| 1  | -0.792687000 | 1.960258000 | 0.120099000  |

|    |              |              |              |
|----|--------------|--------------|--------------|
| 1  | -0.786703000 | 0.214258000  | -0.973084000 |
| 6  | 2.182829000  | -0.882729000 | 0.189383000  |
| 6  | 2.101652000  | -1.256560000 | -1.160495000 |
| 6  | 3.155096000  | -1.477076000 | 1.012917000  |
| 6  | 2.981229000  | -2.211313000 | -1.678836000 |
| 1  | 1.360300000  | -0.805489000 | -1.810957000 |
| 6  | 4.030148000  | -2.430565000 | 0.491620000  |
| 1  | 3.240066000  | -1.200965000 | 2.059908000  |
| 6  | 3.943982000  | -2.799023000 | -0.855168000 |
| 1  | 2.912837000  | -2.491650000 | -2.725335000 |
| 1  | 4.778774000  | -2.882074000 | 1.135240000  |
| 1  | 4.627544000  | -3.539211000 | -1.259828000 |
| 6  | 0.138414000  | -0.454289000 | 2.275669000  |
| 1  | 0.896509000  | -0.756265000 | 3.006666000  |
| 1  | -0.459065000 | 0.333022000  | 2.750520000  |
| 6  | -0.741208000 | -1.649832000 | 1.887126000  |
| 1  | -1.163066000 | -2.100248000 | 2.790588000  |
| 1  | -1.578179000 | -1.355478000 | 1.247056000  |
| 1  | -0.167401000 | -2.421836000 | 1.366169000  |
| 12 | -2.533527000 | 1.145540000  | -0.597040000 |
| 35 | -4.506794000 | -0.263667000 | -0.578487000 |

**PrVa-i**

E = -718.855556      ZPVE = 0.226499      NIMAG = 0.

|    |          |           |          |
|----|----------|-----------|----------|
| 15 | 1.2632   | -0.394934 | 0.215603 |
| 6  | 1.596169 | -0.771685 | 1.982312 |
| 1  | 2.676613 | -0.859789 | 2.126195 |
| 1  | 1.20755  | 0.008305  | 2.641854 |

|   |           |           |           |
|---|-----------|-----------|-----------|
| 1 | 1.129619  | -1.726177 | 2.238226  |
| 5 | 1.987941  | -1.754499 | -0.968349 |
| 1 | 1.47522   | -2.8043   | -0.637285 |
| 1 | 3.182905  | -1.731828 | -0.745522 |
| 1 | 1.721814  | -1.441456 | -2.109177 |
| 6 | -0.553575 | -0.169111 | 0.097063  |
| 6 | -1.285187 | -0.928904 | -0.828612 |
| 6 | -1.232463 | 0.750788  | 0.91519   |
| 6 | -2.671101 | -0.773303 | -0.933355 |
| 1 | -0.771632 | -1.641007 | -1.466141 |
| 6 | -2.61604  | 0.905134  | 0.809288  |
| 1 | -0.689212 | 1.352312  | 1.638781  |
| 6 | -3.337754 | 0.142333  | -0.11559  |
| 1 | -3.226168 | -1.367484 | -1.653178 |
| 1 | -3.129276 | 1.618648  | 1.44711   |
| 1 | -4.414018 | 0.262735  | -0.196842 |
| 6 | 1.99938   | 1.283809  | -0.030726 |
| 1 | 1.592643  | 1.952705  | 0.73602   |
| 1 | 3.06989   | 1.17079   | 0.176815  |
| 6 | 1.782743  | 1.866914  | -1.433101 |
| 1 | 2.260493  | 2.849068  | -1.505831 |
| 1 | 2.214274  | 1.222531  | -2.204026 |
| 1 | 0.718542  | 1.995585  | -1.654112 |

**R1v + a** S<sub>N</sub>2@P-b pathways in THF

**RC<sub>Va-i</sub>**

E = -3759.239634      ZPVE = 0.174944      NIMAG = 0.

17    3.582869000    -0.966159000    -1.234855000

15    2.549802000    -0.012327000    0.284078000

|    |              |              |              |
|----|--------------|--------------|--------------|
| 6  | 3.541455000  | -0.354798000 | 1.771311000  |
| 1  | 3.535817000  | -1.428384000 | 1.970609000  |
| 1  | 4.567119000  | -0.003039000 | 1.642114000  |
| 1  | 3.076420000  | 0.166952000  | 2.613591000  |
| 6  | 2.746851000  | 1.757877000  | -0.096197000 |
| 1  | 3.804382000  | 2.024331000  | -0.155921000 |
| 1  | 2.250101000  | 1.987385000  | -1.041200000 |
| 1  | 2.269310000  | 2.329858000  | 0.705567000  |
| 5  | 0.739975000  | -0.681871000 | 0.379138000  |
| 1  | 0.251017000  | -0.479645000 | -0.715411000 |
| 1  | 0.235619000  | -0.029632000 | 1.274705000  |
| 1  | 0.795313000  | -1.851893000 | 0.641961000  |
| 6  | -1.498754000 | 2.629589000  | -0.510312000 |
| 1  | -0.561145000 | 3.063156000  | -0.125989000 |
| 1  | -1.445097000 | 2.761237000  | -1.603617000 |
| 6  | -2.695961000 | 3.436362000  | 0.037189000  |
| 1  | -3.650913000 | 3.060743000  | -0.353368000 |
| 1  | -2.763804000 | 3.372976000  | 1.131575000  |
| 1  | -2.654907000 | 4.509219000  | -0.212995000 |
| 12 | -1.521442000 | 0.539172000  | -0.092506000 |
| 35 | -3.055569000 | -1.376526000 | 0.294024000  |

**TS<sub>Va-i</sub>**

E = -3759.211066      ZPVE = 0.176090      NIMAG = 1.

|    |           |           |           |
|----|-----------|-----------|-----------|
| 17 | -3.944411 | -1.064178 | -0.21375  |
| 15 | -1.930519 | 0.000413  | 0.033808  |
| 6  | -2.561695 | 1.469682  | -0.872278 |
| 1  | -3.000298 | 1.115502  | -1.806495 |



|    |           |           |           |
|----|-----------|-----------|-----------|
| 1  | -3.344584 | 1.940827  | -0.27354  |
| 1  | -1.772937 | 2.187156  | -1.084119 |
| 6  | -2.158815 | 0.022969  | 1.862058  |
| 1  | -3.05378  | 0.602545  | 2.097877  |
| 1  | -2.320961 | -1.009303 | 2.178656  |
| 1  | -1.295927 | 0.440727  | 2.376902  |
| 5  | -0.8292   | -1.367594 | -0.867345 |
| 1  | -0.177535 | -1.886757 | 0.033311  |
| 1  | -0.141419 | -0.754195 | -1.665883 |
| 1  | -1.487822 | -2.195234 | -1.420779 |
| 6  | 0.09975   | 1.571971  | 0.57374   |
| 1  | -0.775794 | 2.091284  | 0.962038  |
| 1  | 0.71567   | 1.439651  | 1.484626  |
| 6  | 0.822994  | 2.512951  | -0.419993 |
| 1  | 1.778439  | 2.115772  | -0.7904   |
| 1  | 0.211671  | 2.714966  | -1.306868 |
| 1  | 1.055378  | 3.483205  | 0.039618  |
| 12 | 1.099203  | -0.295169 | -0.053075 |
| 35 | 3.52471   | -0.493907 | 0.011833  |

**PC<sub>Va-i</sub>**

E = -3759.289733      ZPVE = 0.178857      NIMAG = 0.

|    |              |              |              |
|----|--------------|--------------|--------------|
| 17 | -5.212900000 | -1.520887000 | -0.349756000 |
| 15 | -1.678235000 | 0.793285000  | 0.262652000  |
| 6  | -2.930203000 | 1.507356000  | -0.855192000 |
| 1  | -3.707376000 | 0.751244000  | -1.008599000 |
| 1  | -3.372589000 | 2.399804000  | -0.403956000 |
| 1  | -2.477517000 | 1.768960000  | -1.814281000 |

|    |              |              |              |
|----|--------------|--------------|--------------|
| 6  | -2.563050000 | 0.262545000  | 1.767566000  |
| 1  | -3.066874000 | 1.117988000  | 2.225694000  |
| 1  | -3.308506000 | -0.486557000 | 1.482267000  |
| 1  | -1.853710000 | -0.166266000 | 2.480309000  |
| 5  | -0.758944000 | -0.703715000 | -0.569422000 |
| 1  | -0.238922000 | -1.325549000 | 0.359172000  |
| 1  | 0.053816000  | -0.237054000 | -1.363218000 |
| 1  | -1.528564000 | -1.421714000 | -1.140809000 |
| 6  | -0.532153000 | 2.140952000  | 0.782786000  |
| 1  | -1.097252000 | 2.804554000  | 1.447100000  |
| 1  | 0.246157000  | 1.667353000  | 1.392887000  |
| 6  | 0.091135000  | 2.940680000  | -0.370458000 |
| 1  | 0.635863000  | 2.299652000  | -1.069878000 |
| 1  | -0.668519000 | 3.489008000  | -0.934769000 |
| 1  | 0.799773000  | 3.671492000  | 0.030104000  |
| 12 | 1.572209000  | -1.262149000 | -0.465742000 |
| 35 | 3.753451000  | -0.315193000 | 0.015126000  |

**P<sub>Va-i</sub>**

E = -527.113057      ZPVE = 0.172680      NIMAG = 0.

|    |           |           |           |
|----|-----------|-----------|-----------|
| 15 | -0.413988 | 0.084126  | -0.001734 |
| 6  | -0.508194 | -0.638628 | 1.683087  |
| 1  | -1.481049 | -0.396068 | 2.119228  |
| 1  | -0.386813 | -1.725366 | 1.654884  |
| 1  | 0.269153  | -0.203697 | 2.316247  |
| 6  | -1.712377 | -0.791489 | -0.957944 |
| 1  | -1.567331 | -1.874874 | -0.921904 |
| 1  | -2.693307 | -0.545236 | -0.542648 |

|   |           |           |           |
|---|-----------|-----------|-----------|
| 1 | -1.682996 | -0.45739  | -1.9986   |
| 5 | -0.62903  | 2.013473  | -0.031599 |
| 1 | -1.73647  | 2.223584  | 0.424964  |
| 1 | -0.536382 | 2.342291  | -1.19886  |
| 1 | 0.252716  | 2.483537  | 0.658464  |
| 6 | 1.171014  | -0.52909  | -0.726222 |
| 1 | 1.149795  | -1.625165 | -0.705182 |
| 1 | 1.157205  | -0.22717  | -1.779938 |
| 6 | 2.435758  | 0.004172  | -0.038505 |
| 1 | 2.472906  | 1.096812  | -0.062828 |
| 1 | 2.494313  | -0.314224 | 1.007087  |
| 1 | 3.326035  | -0.376072 | -0.549406 |

**R11 + a S<sub>N</sub>2@P-f pathways in THF**

**RC<sub>1a-r</sub>**

E = -4303.614385      ZPVE = 0.463926      NIMAG = 0.

|   |           |           |           |
|---|-----------|-----------|-----------|
| 6 | 1.425353  | -1.218611 | 1.074084  |
| 6 | 0.045606  | -2.820083 | -0.387271 |
| 6 | -0.859317 | -2.12876  | 1.907425  |
| 6 | 0.563755  | -1.679915 | 2.275889  |
| 6 | -0.789331 | -3.227523 | 0.837437  |
| 6 | 2.401496  | -2.066348 | -1.224219 |
| 6 | -1.631658 | -2.583241 | 3.15202   |
| 6 | 3.876264  | -1.983701 | -0.789574 |
| 6 | 2.270976  | -3.125187 | -2.334673 |
| 1 | 2.442063  | -1.055279 | 1.447135  |
| 1 | 0.121633  | -3.68444  | -1.052144 |
| 1 | -0.477017 | -2.042121 | -0.95372  |

|    |           |           |           |
|----|-----------|-----------|-----------|
| 1  | -1.399313 | -1.27428  | 1.477525  |
| 1  | 0.538181  | -0.910575 | 3.051477  |
| 1  | 1.096015  | -2.536114 | 2.714394  |
| 1  | -1.801967 | -3.499066 | 0.515361  |
| 1  | -0.350107 | -4.129702 | 1.289811  |
| 1  | 2.119938  | -1.103583 | -1.672086 |
| 1  | -1.713845 | -1.773933 | 3.886632  |
| 1  | -2.645913 | -2.90304  | 2.88883   |
| 1  | -1.128947 | -3.428592 | 3.638494  |
| 1  | 4.208671  | -2.949293 | -0.388066 |
| 1  | 4.515198  | -1.741289 | -1.645218 |
| 1  | 4.056855  | -1.223281 | -0.026057 |
| 1  | 2.446662  | -4.134439 | -1.941068 |
| 1  | 3.017706  | -2.939409 | -3.114012 |
| 1  | 1.287909  | -3.112881 | -2.812232 |
| 6  | 2.47326   | 1.323555  | -0.150154 |
| 6  | 2.502088  | 1.882305  | -1.437817 |
| 6  | 3.594163  | 1.450061  | 0.688521  |
| 6  | 3.648021  | 2.544913  | -1.885523 |
| 1  | 1.638973  | 1.803822  | -2.089454 |
| 6  | 4.731833  | 2.118053  | 0.237992  |
| 1  | 3.580777  | 1.044435  | 1.69563   |
| 6  | 4.761522  | 2.663119  | -1.050811 |
| 1  | 3.664688  | 2.970753  | -2.883821 |
| 1  | 5.592745  | 2.214631  | 0.892092  |
| 1  | 5.649143  | 3.182269  | -1.399294 |
| 17 | 0.488494  | 1.569726  | 2.141306  |
| 6  | 1.467993  | -2.351278 | -0.011641 |
| 1  | 1.933367  | -3.190261 | 0.531596  |
| 15 | 0.954535  | 0.488123  | 0.415974  |

|    |           |           |           |
|----|-----------|-----------|-----------|
| 5  | -0.516637 | 0.684305  | -0.840579 |
| 1  | -0.739211 | 1.87109   | -0.935037 |
| 1  | -0.169043 | 0.182097  | -1.87694  |
| 1  | -1.419005 | 0.041739  | -0.351036 |
| 12 | -3.066953 | 1.337146  | -0.24961  |
| 35 | -4.174161 | -0.457976 | -1.5918   |
| 6  | -3.311675 | 2.965744  | 1.09811   |
| 1  | -2.527395 | 2.882693  | 1.866823  |
| 1  | -4.262182 | 2.82851   | 1.638376  |
| 6  | -3.274718 | 4.382559  | 0.487605  |
| 1  | -4.07727  | 4.530804  | -0.247104 |
| 1  | -3.383244 | 5.18404   | 1.236654  |
| 1  | -2.330033 | 4.575406  | -0.038519 |

**TS<sub>1a-r</sub>**

E = -4303.555010    ZPVE = 0.460691    NIMAG = 1.

|   |          |           |           |
|---|----------|-----------|-----------|
| 6 | 2.084606 | -0.713508 | 0.675554  |
| 6 | 2.560273 | -2.292406 | -1.304592 |
| 6 | 1.323429 | -3.189458 | 0.747761  |
| 6 | 1.838604 | -1.975137 | 1.533161  |
| 6 | 2.28682  | -3.506585 | -0.404563 |
| 6 | 3.499695 | 0.142627  | -1.392471 |
| 6 | 1.123151 | -4.39635  | 1.672609  |
| 6 | 4.294082 | 1.177248  | -0.574355 |
| 6 | 4.344883 | -0.282502 | -2.60746  |
| 1 | 2.577624 | 0.026489  | 1.310852  |
| 1 | 3.314752 | -2.572584 | -2.044719 |
| 1 | 1.6567   | -2.036108 | -1.868871 |

|    |           |           |           |
|----|-----------|-----------|-----------|
| 1  | 0.344674  | -2.932152 | 0.31959   |
| 1  | 1.1667    | -1.738478 | 2.35979   |
| 1  | 2.813268  | -2.230352 | 1.973999  |
| 1  | 1.887076  | -4.328662 | -1.011106 |
| 1  | 3.238222  | -3.863721 | 0.018054  |
| 1  | 2.598952  | 0.633485  | -1.789574 |
| 1  | 0.401952  | -4.172139 | 2.465737  |
| 1  | 0.749832  | -5.260476 | 1.111675  |
| 1  | 2.068864  | -4.688408 | 2.146644  |
| 1  | 5.221391  | 0.729883  | -0.194895 |
| 1  | 4.569203  | 2.030988  | -1.202235 |
| 1  | 3.739474  | 1.570836  | 0.280902  |
| 1  | 5.220219  | -0.865964 | -2.294957 |
| 1  | 4.710311  | 0.605727  | -3.133459 |
| 1  | 3.777185  | -0.879364 | -3.32571  |
| 6  | 0.856229  | 1.954194  | 0.326496  |
| 6  | 0.517007  | 2.883902  | -0.686872 |
| 6  | 1.3816    | 2.433045  | 1.551559  |
| 6  | 0.74782   | 4.242818  | -0.492687 |
| 1  | 0.114646  | 2.53567   | -1.63128  |
| 6  | 1.582221  | 3.796157  | 1.742544  |
| 1  | 1.613484  | 1.743941  | 2.357049  |
| 6  | 1.272568  | 4.703006  | 0.720697  |
| 1  | 0.512385  | 4.944694  | -1.286264 |
| 1  | 1.975901  | 4.15347   | 2.688554  |
| 1  | 1.438349  | 5.765113  | 0.871111  |
| 17 | -1.352516 | -1.12049  | 2.133698  |
| 6  | 3.06621   | -1.067691 | -0.516535 |
| 1  | 3.971378  | -1.392465 | 0.023066  |
| 15 | 0.572418  | 0.213769  | 0.056613  |

|    |           |           |           |
|----|-----------|-----------|-----------|
| 5  | -0.549248 | -0.323341 | -1.463384 |
| 1  | -1.324437 | 0.593484  | -1.593496 |
| 1  | 0.14199   | -0.516895 | -2.432065 |
| 1  | -1.081777 | -1.357332 | -1.110495 |
| 12 | -2.512377 | -0.297014 | 0.236166  |
| 35 | -4.538117 | -0.867619 | -1.042403 |
| 6  | -2.562964 | 1.923482  | 0.862707  |
| 1  | -1.607302 | 2.179057  | 1.31612   |
| 1  | -3.320992 | 1.681206  | 1.616159  |
| 6  | -3.031903 | 2.807777  | -0.258155 |
| 1  | -4.002691 | 2.492355  | -0.652359 |
| 1  | -3.138743 | 3.855764  | 0.077554  |
| 1  | -2.319188 | 2.838572  | -1.092771 |

**PC<sub>1a-r</sub>**

E = -4303.711172    ZPVE = 0.467743    NIMAG = 0.

|   |           |          |           |
|---|-----------|----------|-----------|
| 6 | 1.948833  | 1.379302 | -0.339004 |
| 6 | 0.74012   | 2.502877 | 1.621593  |
| 6 | 0.289034  | 3.328023 | -0.764735 |
| 6 | 1.584837  | 2.620426 | -1.193374 |
| 6 | 0.376426  | 3.696642 | 0.723949  |
| 6 | 2.520792  | 0.662533 | 2.124513  |
| 6 | 0.012545  | 4.554206 | -1.643682 |
| 6 | 3.978454  | 0.266192 | 1.825237  |
| 6 | 2.410068  | 1.052411 | 3.61021   |
| 1 | 2.943848  | 1.051816 | -0.661094 |
| 1 | 0.872872  | 2.870348 | 2.642801  |
| 1 | -0.092554 | 1.792608 | 1.65641   |

|    |           |           |           |
|----|-----------|-----------|-----------|
| 1  | -0.551957 | 2.631516  | -0.892976 |
| 1  | 1.552922  | 2.372226  | -2.258328 |
| 1  | 2.418551  | 3.328213  | -1.079084 |
| 1  | -0.574224 | 4.131656  | 1.057053  |
| 1  | 1.138291  | 4.481862  | 0.84395   |
| 1  | 1.887281  | -0.221963 | 1.979276  |
| 1  | -0.09164  | 4.273999  | -2.698118 |
| 1  | -0.911915 | 5.056228  | -1.33745  |
| 1  | 0.830029  | 5.28219   | -1.568171 |
| 1  | 4.649359  | 1.11519   | 2.00837   |
| 1  | 4.294649  | -0.554232 | 2.478208  |
| 1  | 4.129528  | -0.064753 | 0.794858  |
| 1  | 2.942559  | 1.990168  | 3.814567  |
| 1  | 2.861831  | 0.273248  | 4.233608  |
| 1  | 1.373564  | 1.17224   | 3.936214  |
| 6  | 1.944121  | -1.616724 | -0.539319 |
| 6  | 1.544365  | -2.653324 | 0.317569  |
| 6  | 3.139231  | -1.752431 | -1.266987 |
| 6  | 2.332898  | -3.799756 | 0.453181  |
| 1  | 0.620026  | -2.573518 | 0.879353  |
| 6  | 3.922848  | -2.899461 | -1.131998 |
| 1  | 3.466493  | -0.970027 | -1.946167 |
| 6  | 3.521866  | -3.924775 | -0.26908  |
| 1  | 2.012877  | -4.593933 | 1.120824  |
| 1  | 4.843445  | -2.991686 | -1.700212 |
| 1  | 4.132065  | -4.816724 | -0.163883 |
| 17 | -3.802708 | 0.11598   | -2.443727 |
| 6  | 2.032058  | 1.788768  | 1.16837   |
| 1  | 2.824504  | 2.556116  | 1.181902  |
| 15 | 0.889534  | -0.131403 | -0.760434 |



|    |           |           |           |
|----|-----------|-----------|-----------|
| 5  | -0.791855 | -0.359082 | 0.197244  |
| 1  | -1.312279 | -1.353285 | -0.288073 |
| 1  | -0.623408 | -0.502638 | 1.375175  |
| 1  | -1.433754 | 0.655249  | -0.023684 |
| 12 | -3.180367 | -0.422437 | -0.294178 |
| 35 | -4.268051 | -1.100582 | 1.787334  |
| 6  | 0.606677  | -0.04931  | -2.590813 |
| 1  | 1.563401  | 0.189055  | -3.067525 |
| 1  | -0.063342 | 0.797149  | -2.769426 |
| 6  | 0.014275  | -1.330492 | -3.193866 |
| 1  | -0.960282 | -1.567465 | -2.761139 |
| 1  | -0.127127 | -1.188217 | -4.269522 |
| 1  | 0.676216  | -2.188857 | -3.051204 |

**R1<sub>II</sub> + a S<sub>N</sub>2@P-f pathways in THF**

**RC<sub>IIa-r</sub>**

E = -3995.124825      ZPVE = 0.344369      NIMAG = 0.

|    |           |           |           |
|----|-----------|-----------|-----------|
| 17 | 1.41312   | 1.080727  | 1.764278  |
| 6  | -2.641417 | 2.703335  | 0.992619  |
| 1  | -3.525978 | 2.792857  | 1.642756  |
| 1  | -1.774758 | 2.778004  | 1.668938  |
| 6  | -2.614047 | 3.887758  | 0.002532  |
| 1  | -1.738551 | 3.844434  | -0.659568 |
| 1  | -3.498428 | 3.894597  | -0.648394 |
| 1  | -2.582158 | 4.871779  | 0.498464  |
| 15 | 1.501724  | -0.001456 | -0.017053 |
| 12 | -2.606112 | 0.765012  | 0.106814  |
| 35 | -3.878493 | -1.32042  | -0.428531 |

|   |           |           |           |
|---|-----------|-----------|-----------|
| 5 | -0.174221 | 0.213172  | -0.98398  |
| 1 | -0.961017 | -0.513181 | -0.414168 |
| 1 | -0.475035 | 1.382912  | -0.963027 |
| 1 | 0.024734  | -0.196478 | -2.100908 |
| 6 | 1.75204   | -1.796036 | 0.556344  |
| 6 | 0.667268  | -2.111948 | 1.612538  |
| 1 | -0.342812 | -1.918147 | 1.242956  |
| 1 | 0.733782  | -3.178944 | 1.851164  |
| 1 | 0.81762   | -1.551272 | 2.537738  |
| 6 | 3.142402  | -2.047131 | 1.165949  |
| 1 | 3.940548  | -1.975028 | 0.423442  |
| 1 | 3.361947  | -1.36247  | 1.990238  |
| 1 | 3.162441  | -3.066218 | 1.567965  |
| 6 | 1.526509  | -2.714395 | -0.668823 |
| 1 | 0.527853  | -2.591521 | -1.094477 |
| 1 | 2.263763  | -2.559307 | -1.458752 |
| 1 | 1.620428  | -3.752182 | -0.330244 |
| 6 | 2.966784  | 0.79518   | -0.928969 |
| 6 | 3.337915  | -0.093474 | -2.137419 |
| 1 | 4.053197  | 0.459793  | -2.75594  |
| 1 | 3.821598  | -1.025103 | -1.833817 |
| 1 | 2.473951  | -0.329289 | -2.765064 |
| 6 | 4.202343  | 1.016107  | -0.035817 |
| 1 | 4.628707  | 0.083941  | 0.337095  |
| 1 | 4.970121  | 1.512404  | -0.639821 |
| 1 | 3.981194  | 1.662994  | 0.816185  |
| 6 | 2.460122  | 2.163793  | -1.440087 |
| 1 | 1.629854  | 2.058529  | -2.141912 |
| 1 | 2.144105  | 2.817157  | -0.621723 |
| 1 | 3.286186  | 2.658777  | -1.962545 |

**TS<sub>IIa-r</sub>**

E = -3995.045548    ZPVE = 0.347165    NIMAG = 1.

|    |           |           |           |
|----|-----------|-----------|-----------|
| 17 | 0.914226  | -0.200089 | 2.372733  |
| 6  | -0.856129 | 1.692827  | 0.832919  |
| 1  | -1.399833 | 1.159607  | 1.620142  |
| 1  | 0.084482  | 2.015668  | 1.255841  |
| 6  | -1.61949  | 2.856231  | 0.19154   |
| 1  | -1.103957 | 3.268041  | -0.682296 |
| 1  | -2.650357 | 2.617709  | -0.105262 |
| 1  | -1.713047 | 3.676654  | 0.920151  |
| 15 | 1.070679  | -0.017899 | -0.19961  |
| 12 | -1.806885 | 0.276141  | -0.639917 |
| 35 | -4.051513 | -0.434379 | -0.065553 |
| 5  | 0.058468  | 0.04195   | -1.94111  |
| 1  | -0.762891 | -0.871663 | -1.895892 |
| 1  | -0.49313  | 1.12896   | -1.983648 |
| 1  | 0.76068   | -0.132414 | -2.894315 |
| 6  | 1.690508  | -1.874782 | -0.150916 |
| 6  | 0.538451  | -2.754321 | 0.387454  |
| 1  | -0.388874 | -2.624326 | -0.180187 |
| 1  | 0.83472   | -3.804576 | 0.279635  |
| 1  | 0.335695  | -2.560631 | 1.440302  |
| 6  | 2.952678  | -2.100525 | 0.701964  |
| 1  | 3.831414  | -1.603444 | 0.283632  |
| 1  | 2.817897  | -1.773343 | 1.731695  |
| 1  | 3.165653  | -3.176445 | 0.71155   |
| 6  | 1.987281  | -2.340117 | -1.599755 |

|   |          |           |           |
|---|----------|-----------|-----------|
| 1 | 1.093644 | -2.36169  | -2.223892 |
| 1 | 2.746675 | -1.741442 | -2.103654 |
| 1 | 2.368323 | -3.36619  | -1.533576 |
| 6 | 2.49554  | 1.27467   | -0.356784 |
| 6 | 3.449006 | 0.777026  | -1.472126 |
| 1 | 4.196066 | 1.562125  | -1.636334 |
| 1 | 3.988595 | -0.129172 | -1.194244 |
| 1 | 2.933976 | 0.610507  | -2.420907 |
| 6 | 3.293942 | 1.483747  | 0.9403    |
| 1 | 3.746733 | 0.561249  | 1.306923  |
| 1 | 4.099462 | 2.197036  | 0.72836   |
| 1 | 2.674032 | 1.8948    | 1.738374  |
| 6 | 1.91051  | 2.628274  | -0.813158 |
| 1 | 1.323884 | 2.54262   | -1.730502 |
| 1 | 1.297658 | 3.099921  | -0.044523 |
| 1 | 2.749933 | 3.302081  | -1.019361 |

**PCIIa-r**

E = -3995.168082      ZPVE = 0.350517      NIMAG = 0.

|    |           |           |           |
|----|-----------|-----------|-----------|
| 17 | 2.625666  | 3.827708  | -0.205091 |
| 6  | 0.172297  | 0.974059  | -0.403027 |
| 1  | -0.560698 | 1.198191  | 0.377978  |
| 1  | 0.985407  | 1.703293  | -0.293532 |
| 6  | -0.501253 | 1.146635  | -1.773021 |
| 1  | 0.213708  | 1.100323  | -2.596801 |
| 1  | -1.287806 | 0.409181  | -1.957448 |
| 1  | -0.968899 | 2.135021  | -1.80302  |
| 15 | 0.823507  | -0.700387 | 0.054972  |

|    |           |           |           |
|----|-----------|-----------|-----------|
| 12 | -3.002599 | -1.475444 | 0.050249  |
| 35 | -4.205292 | 0.631701  | 0.04057   |
| 5  | -0.659694 | -1.96001  | 0.249129  |
| 1  | -1.326517 | -1.543146 | 1.193835  |
| 1  | -1.27052  | -1.937036 | -0.819201 |
| 1  | -0.304988 | -3.084322 | 0.465018  |
| 6  | 1.651726  | -0.466867 | 1.758729  |
| 6  | 0.693902  | 0.365034  | 2.645152  |
| 1  | -0.302202 | -0.080963 | 2.721749  |
| 1  | 1.115582  | 0.398814  | 3.655909  |
| 1  | 0.595452  | 1.396117  | 2.299089  |
| 6  | 2.993564  | 0.28617   | 1.651282  |
| 1  | 3.760567  | -0.301404 | 1.141263  |
| 1  | 2.895121  | 1.253085  | 1.148038  |
| 1  | 3.35813   | 0.479846  | 2.667006  |
| 6  | 1.863156  | -1.838481 | 2.437233  |
| 1  | 0.919853  | -2.369613 | 2.590656  |
| 1  | 2.536227  | -2.490973 | 1.878896  |
| 1  | 2.31326   | -1.666697 | 3.421652  |
| 6  | 2.014253  | -1.306118 | -1.303761 |
| 6  | 2.8978    | -2.463521 | -0.792008 |
| 1  | 3.468733  | -2.85708  | -1.640844 |
| 1  | 3.618985  | -2.140821 | -0.0385   |
| 1  | 2.305219  | -3.287533 | -0.383567 |
| 6  | 2.907738  | -0.15544  | -1.814024 |
| 1  | 3.545006  | 0.262924  | -1.033721 |
| 1  | 3.560621  | -0.549777 | -2.601348 |
| 1  | 2.329115  | 0.663465  | -2.246104 |
| 6  | 1.161156  | -1.851946 | -2.474616 |
| 1  | 0.598988  | -2.743407 | -2.183833 |

|   |          |           |           |
|---|----------|-----------|-----------|
| 1 | 0.461318 | -1.116534 | -2.875371 |
| 1 | 1.840282 | -2.137503 | -3.286059 |

**P<sub>IIa-r</sub>**

E = -762.989835      ZPVE = 0.343658      NIMAG = 0.

|    |           |           |           |
|----|-----------|-----------|-----------|
| 6  | -0.389394 | 1.864445  | -0.640703 |
| 1  | 0.386669  | 2.579662  | -0.354389 |
| 1  | -0.230325 | 1.633558  | -1.699447 |
| 6  | -1.75865  | 2.531405  | -0.438408 |
| 1  | -2.57818  | 1.938537  | -0.851605 |
| 1  | -1.965718 | 2.711799  | 0.619724  |
| 1  | -1.765408 | 3.498519  | -0.952124 |
| 15 | -0.011285 | 0.350923  | 0.376026  |
| 5  | -0.062073 | 0.764738  | 2.291002  |
| 1  | 0.900968  | 1.472639  | 2.506315  |
| 1  | -1.105826 | 1.347571  | 2.495111  |
| 1  | -0.002622 | -0.287218 | 2.89394   |
| 6  | 1.765048  | -0.116131 | -0.167786 |
| 6  | 2.62983   | 1.167633  | -0.120215 |
| 1  | 2.546179  | 1.687402  | 0.838133  |
| 1  | 3.67925   | 0.879891  | -0.253914 |
| 1  | 2.381048  | 1.866868  | -0.922947 |
| 6  | 1.844914  | -0.696656 | -1.593684 |
| 1  | 1.359074  | -1.671225 | -1.679332 |
| 1  | 1.409936  | -0.02577  | -2.341102 |
| 1  | 2.900509  | -0.836224 | -1.857104 |
| 6  | 2.361949  | -1.120637 | 0.843006  |
| 1  | 2.367535  | -0.711484 | 1.856345  |
| 1  | 1.827074  | -2.071723 | 0.862416  |

|   |           |           |           |
|---|-----------|-----------|-----------|
| 1 | 3.399298  | -1.330951 | 0.555786  |
| 6 | -1.290521 | -0.987446 | -0.099202 |
| 6 | -0.789087 | -2.391582 | 0.301446  |
| 1 | -1.607456 | -3.106775 | 0.155262  |
| 1 | 0.050418  | -2.730742 | -0.309527 |
| 1 | -0.496733 | -2.434951 | 1.354618  |
| 6 | -1.635914 | -0.972338 | -1.602769 |
| 1 | -0.770713 | -1.176556 | -2.236742 |
| 1 | -2.38012  | -1.753522 | -1.80007  |
| 1 | -2.073385 | -0.021295 | -1.918415 |
| 6 | -2.576163 | -0.708495 | 0.717067  |
| 1 | -2.392213 | -0.779044 | 1.791425  |
| 1 | -3.005141 | 0.274176  | 0.511775  |
| 1 | -3.326559 | -1.461863 | 0.447955  |

**R1<sub>III</sub> + a S<sub>N</sub>2@P-f pathways in THF**

**RC<sub>IIIa-r</sub>**

E = -4142.721865    ZPVE = 0.281148    NIMAG = 0.

|    |           |          |          |
|----|-----------|----------|----------|
| 17 | 0.860557  | 0.497991 | 2.303978 |
| 6  | -3.326122 | 1.644411 | 2.123115 |
| 1  | -4.374378 | 1.655419 | 2.462133 |
| 1  | -2.755095 | 1.228682 | 2.969032 |
| 6  | -2.861317 | 3.093698 | 1.864532 |
| 1  | -1.811476 | 3.133401 | 1.544419 |
| 1  | -3.448643 | 3.574217 | 1.070639 |
| 1  | -2.941747 | 3.743161 | 2.751651 |
| 15 | 1.000697  | 0.028883 | 0.277768 |
| 12 | -3.163701 | 0.312655 | 0.469746 |

|    |           |           |           |
|----|-----------|-----------|-----------|
| 35 | -4.419991 | -0.925491 | -1.279621 |
| 5  | -0.762521 | -0.088404 | -0.510984 |
| 1  | -1.322501 | -0.955399 | 0.126382  |
| 1  | -1.275107 | 1.008915  | -0.428378 |
| 1  | -0.57726  | -0.427515 | -1.651375 |
| 6  | 1.890111  | -1.559912 | 0.249666  |
| 6  | 2.880672  | -1.797106 | -0.716938 |
| 6  | 1.492964  | -2.595313 | 1.113027  |
| 6  | 3.473615  | -3.058924 | -0.809044 |
| 1  | 3.190306  | -1.011233 | -1.397127 |
| 6  | 2.094612  | -3.849876 | 1.017235  |
| 1  | 0.725504  | -2.426595 | 1.861605  |
| 6  | 3.084572  | -4.083514 | 0.056733  |
| 1  | 4.240122  | -3.235704 | -1.556995 |
| 1  | 1.788087  | -4.644127 | 1.690495  |
| 1  | 3.549704  | -5.061786 | -0.015941 |
| 6  | 2.076881  | 1.308365  | -0.420215 |
| 6  | 3.393446  | 1.485598  | 0.04175   |
| 6  | 1.564478  | 2.148613  | -1.421995 |
| 6  | 4.189196  | 2.491497  | -0.503118 |
| 1  | 3.794009  | 0.847426  | 0.82325   |
| 6  | 2.371666  | 3.150229  | -1.967161 |
| 1  | 0.545585  | 2.026917  | -1.77361  |
| 6  | 3.679798  | 3.322213  | -1.508694 |
| 1  | 5.204327  | 2.627935  | -0.14404  |
| 1  | 1.974485  | 3.795267  | -2.744294 |
| 1  | 4.303444  | 4.104395  | -1.930639 |

**TSIIIa-r**



E = -4142.667876      ZPVE = 0.282924      NIMAG = 1.

|    |           |           |           |
|----|-----------|-----------|-----------|
| 17 | 0.209214  | -0.999985 | 2.120445  |
| 6  | -1.207154 | 1.321454  | 0.877894  |
| 1  | -2.088565 | 0.987153  | 1.468308  |
| 1  | -0.531525 | 1.600248  | 1.681993  |
| 6  | -1.550242 | 2.550098  | 0.020659  |
| 1  | -0.643538 | 2.995798  | -0.395949 |
| 1  | -2.210417 | 2.346399  | -0.833592 |
| 1  | -2.05176  | 3.320792  | 0.621862  |
| 15 | 0.51653   | -0.155719 | 0.031879  |
| 12 | -2.462621 | -0.239525 | -0.227144 |
| 35 | -4.876899 | -0.424962 | -0.201328 |
| 5  | -0.574908 | -0.636155 | -1.544545 |
| 1  | -1.283601 | -1.573389 | -1.185757 |
| 1  | -1.229682 | 0.359693  | -1.803941 |
| 1  | 0.072841  | -1.004032 | -2.482069 |
| 6  | 1.939074  | -1.397561 | -0.123068 |
| 6  | 3.2682    | -1.080492 | 0.19648   |
| 6  | 1.655069  | -2.69561  | -0.580736 |
| 6  | 4.285499  | -2.030036 | 0.054411  |
| 1  | 3.525838  | -0.090709 | 0.556439  |
| 6  | 2.669474  | -3.645331 | -0.722165 |
| 1  | 0.637603  | -2.977688 | -0.830927 |
| 6  | 3.99092   | -3.315653 | -0.405405 |
| 1  | 5.307763  | -1.759985 | 0.304239  |
| 1  | 2.426167  | -4.640763 | -1.082762 |
| 1  | 4.781067  | -4.052433 | -0.516715 |
| 6  | 1.493779  | 1.392751  | -0.104997 |
| 6  | 2.001403  | 2.046318  | 1.027031  |

|   |          |          |           |
|---|----------|----------|-----------|
| 6 | 1.778531 | 1.896938 | -1.382777 |
| 6 | 2.779229 | 3.197406 | 0.882616  |
| 1 | 1.797358 | 1.66061  | 2.021544  |
| 6 | 2.557145 | 3.05041  | -1.521081 |
| 1 | 1.399676 | 1.398655 | -2.269561 |
| 6 | 3.057162 | 3.702934 | -0.391261 |
| 1 | 3.167456 | 3.695838 | 1.765768  |
| 1 | 2.767741 | 3.437018 | -2.513692 |
| 1 | 3.659878 | 4.599323 | -0.501601 |

**PC<sub>IIIa-r</sub>**

E = -4142.820021      ZPVE = 0.285242      NIMAG = 0.

|    |              |              |              |
|----|--------------|--------------|--------------|
| 17 | 3.944662000  | 1.030085000  | 0.807053000  |
| 6  | -0.310284000 | 0.214763000  | 1.872979000  |
| 1  | 0.276277000  | 1.139310000  | 1.879844000  |
| 1  | -1.178140000 | 0.380410000  | 2.519350000  |
| 6  | 0.536194000  | -0.961422000 | 2.377701000  |
| 1  | -0.038762000 | -1.891446000 | 2.399373000  |
| 1  | 1.422904000  | -1.116455000 | 1.757941000  |
| 1  | 0.875696000  | -0.751009000 | 3.396140000  |
| 15 | -0.933093000 | 0.010935000  | 0.142779000  |
| 12 | 2.926202000  | 0.357503000  | -1.152055000 |
| 35 | 3.659784000  | -0.166250000 | -3.427314000 |
| 5  | 0.484035000  | -0.039503000 | -1.188422000 |
| 1  | 0.966817000  | 1.082622000  | -1.178496000 |
| 1  | 1.265966000  | -0.912491000 | -0.843010000 |
| 1  | 0.017259000  | -0.276864000 | -2.267912000 |
| 6  | -2.050049000 | 1.433112000  | -0.153509000 |

|   |              |              |              |
|---|--------------|--------------|--------------|
| 6 | -3.362545000 | 1.258520000  | -0.617037000 |
| 6 | -1.559598000 | 2.734576000  | 0.053514000  |
| 6 | -4.175999000 | 2.369615000  | -0.857766000 |
| 1 | -3.755369000 | 0.262609000  | -0.790688000 |
| 6 | -2.377663000 | 3.840310000  | -0.183846000 |
| 1 | -0.541546000 | 2.895801000  | 0.395145000  |
| 6 | -3.687765000 | 3.659874000  | -0.639002000 |
| 1 | -5.190359000 | 2.222538000  | -1.215921000 |
| 1 | -1.989775000 | 4.840347000  | -0.016214000 |
| 1 | -4.322561000 | 4.521113000  | -0.823865000 |
| 6 | -1.942772000 | -1.509909000 | 0.123834000  |
| 6 | -2.916720000 | -1.733352000 | 1.113575000  |
| 6 | -1.730725000 | -2.482180000 | -0.865818000 |
| 6 | -3.669191000 | -2.908194000 | 1.106199000  |
| 1 | -3.096188000 | -0.994764000 | 1.889143000  |
| 6 | -2.489677000 | -3.656263000 | -0.871142000 |
| 1 | -0.981473000 | -2.325473000 | -1.633852000 |
| 6 | -3.456845000 | -3.871027000 | 0.113226000  |
| 1 | -4.419263000 | -3.071188000 | 1.873932000  |
| 1 | -2.318956000 | -4.401404000 | -1.641989000 |
| 1 | -4.043446000 | -4.784723000 | 0.109238000  |

**R1<sub>IV</sub> + a S<sub>N</sub>2@P-f pathways in THF**

**RC<sub>IVa-r</sub>**

E = -3950.978076      ZPVE = 0.227082      NIMAG = 0.

|    |           |           |          |
|----|-----------|-----------|----------|
| 17 | -1.063521 | -1.661521 | 1.832572 |
| 6  | 1.427587  | 2.405967  | 1.274893 |
| 1  | 0.414825  | 2.063549  | 1.539028 |
| 1  | 1.93029   | 2.592814  | 2.237009 |

|    |           |           |           |
|----|-----------|-----------|-----------|
| 6  | 1.330421  | 3.729526  | 0.48666   |
| 1  | 2.322585  | 4.134722  | 0.24825   |
| 1  | 0.808908  | 3.598164  | -0.470912 |
| 1  | 0.790207  | 4.52093   | 1.031164  |
| 15 | -1.390995 | -1.404329 | -0.213819 |
| 12 | 2.425221  | 0.805361  | 0.294961  |
| 35 | 4.444463  | -0.45146  | -0.385785 |
| 6  | -2.150337 | -2.990147 | -0.697639 |
| 1  | -1.422557 | -3.790902 | -0.548859 |
| 1  | -3.051874 | -3.198269 | -0.118978 |
| 1  | -2.40388  | -2.925226 | -1.760004 |
| 5  | 0.26956   | -1.022425 | -1.131464 |
| 1  | 0.640048  | 0.056722  | -0.706249 |
| 1  | 1.0027    | -1.942403 | -0.875784 |
| 1  | -0.042087 | -0.950086 | -2.297653 |
| 6  | -2.681519 | -0.129346 | -0.309965 |
| 6  | -3.954477 | -0.325539 | 0.254109  |
| 6  | -2.390043 | 1.074229  | -0.972099 |
| 6  | -4.922642 | 0.672415  | 0.151855  |
| 1  | -4.192345 | -1.243939 | 0.781802  |
| 6  | -3.366468 | 2.068482  | -1.073804 |
| 1  | -1.410486 | 1.235272  | -1.408494 |
| 6  | -4.629717 | 1.86929   | -0.51248  |
| 1  | -5.902858 | 0.518373  | 0.591908  |
| 1  | -3.136134 | 2.99626   | -1.587882 |
| 1  | -5.386047 | 2.644442  | -0.589698 |

**TS<sub>IVa-r</sub>**

E = -3950.928881      ZPVE = 0.227419      NIMAG = 1.

|    |           |           |           |
|----|-----------|-----------|-----------|
| 17 | 0.61994   | 2.305283  | -1.13537  |
| 6  | 0.219391  | -1.019119 | -1.365629 |
| 1  | -0.7796   | -0.73405  | -1.685412 |
| 1  | 0.903651  | -0.811997 | -2.206525 |
| 6  | 0.320137  | -2.451331 | -0.867389 |
| 1  | 1.352959  | -2.738485 | -0.643749 |
| 1  | -0.272048 | -2.614179 | 0.040911  |
| 1  | -0.06469  | -3.166792 | -1.613306 |
| 15 | -0.962003 | 1.136255  | 0.553257  |
| 12 | 1.668216  | 0.2725    | -0.237955 |
| 35 | 3.880043  | -0.703104 | 0.200716  |
| 6  | -1.766008 | 2.779187  | 0.676972  |
| 1  | -1.009077 | 3.522405  | 0.925973  |
| 1  | -2.27448  | 3.071055  | -0.242842 |
| 1  | -2.500511 | 2.703646  | 1.486627  |
| 5  | 0.263464  | 0.822552  | 2.056175  |
| 1  | 1.111214  | 0.004559  | 1.755557  |
| 1  | 0.720616  | 1.913561  | 2.277714  |
| 1  | -0.44752  | 0.38051   | 2.926693  |
| 6  | -2.337459 | 0.014529  | 0.248448  |
| 6  | -3.37355  | 0.349046  | -0.647173 |
| 6  | -2.397015 | -1.202936 | 0.958625  |
| 6  | -4.4578   | -0.510351 | -0.811608 |
| 1  | -3.334709 | 1.270433  | -1.218227 |
| 6  | -3.496349 | -2.045603 | 0.800955  |
| 1  | -1.610193 | -1.468106 | 1.655694  |
| 6  | -4.52284  | -1.705823 | -0.0866   |
| 1  | -5.251684 | -0.247042 | -1.503236 |
| 1  | -3.549292 | -2.968693 | 1.369475  |

1 -5.372044 -2.370165 -0.212989

**PCIVa-r**

E = -3951.079225 ZPVE = 0.231117 NIMAG = 0.

17 -3.041387 2.602732 0.383175  
6 1.455757 2.260856 0.551341  
1 2.416233 2.774889 0.436445  
1 0.676769 2.955332 0.2175  
6 1.229064 1.851533 2.012658  
1 0.26072 1.362374 2.148851  
1 2.009587 1.171261 2.365736  
1 1.244567 2.741583 2.648476  
15 1.427934 0.857305 -0.64597  
12 -2.609438 0.368015 -0.007755  
35 -3.810631 -1.772332 -0.021536  
6 1.894834 1.580152 -2.263375  
1 1.155292 2.334834 -2.544155  
1 2.883296 2.042906 -2.216315  
1 1.90151 0.790418 -3.018445  
5 -0.286186 -0.03835 -0.782167  
1 -1.014742 0.791146 -1.304799  
1 -0.174031 -1.006479 -1.485143  
1 -0.641769 -0.352153 0.342563  
6 2.776065 -0.281766 -0.17141  
6 4.099375 0.183739 -0.074397  
6 2.499699 -1.630134 0.10196  
6 5.127643 -0.689017 0.284256  
1 4.337847 1.224131 -0.276878

|   |          |           |          |
|---|----------|-----------|----------|
| 6 | 3.532351 | -2.500901 | 0.462424 |
| 1 | 1.48472  | -2.004925 | 0.027149 |
| 6 | 4.845206 | -2.032834 | 0.552856 |
| 1 | 6.14657  | -0.320604 | 0.353433 |
| 1 | 3.307692 | -3.542569 | 0.6702   |
| 1 | 5.646618 | -2.710729 | 0.830733 |

**P<sub>IVa-r</sub>**

E = -718.854970      ZPVE = 0.226515      NIMAG = 0.

|    |           |           |           |
|----|-----------|-----------|-----------|
| 15 | -1.086775 | 0.316224  | 0.24488   |
| 6  | -1.5186   | -0.422676 | 1.870741  |
| 1  | -2.597779 | -0.343615 | 2.024305  |
| 1  | -1.222338 | -1.472695 | 1.933295  |
| 1  | -1.014008 | 0.14172   | 2.65896   |
| 5  | -1.657291 | 2.168054  | 0.098082  |
| 1  | -1.063881 | 2.77809   | 0.964196  |
| 1  | -2.85558  | 2.145519  | 0.29102   |
| 1  | -1.373565 | 2.54145   | -1.021966 |
| 6  | 0.7229    | 0.073963  | 0.063632  |
| 6  | 1.535317  | 1.166819  | -0.276445 |
| 6  | 1.316179  | -1.187184 | 0.248207  |
| 6  | 2.915286  | 1.001416  | -0.430953 |
| 1  | 1.089461  | 2.145554  | -0.418729 |
| 6  | 2.69444   | -1.350218 | 0.094933  |
| 1  | 0.710892  | -2.049415 | 0.5136    |
| 6  | 3.496425  | -0.255429 | -0.245456 |
| 1  | 3.532951  | 1.855041  | -0.693896 |
| 1  | 3.140856  | -2.329288 | 0.241518  |
| 1  | 4.568367  | -0.383199 | -0.364087 |

|   |           |           |           |
|---|-----------|-----------|-----------|
| 6 | -1.829261 | -0.803069 | -1.029294 |
| 1 | -1.465817 | -0.43411  | -1.994908 |
| 1 | -1.409405 | -1.805504 | -0.890741 |
| 6 | -3.363655 | -0.850736 | -1.018066 |
| 1 | -3.717991 | -1.50306  | -1.822581 |
| 1 | -3.751967 | -1.248858 | -0.075424 |
| 1 | -3.796302 | 0.141426  | -1.171969 |

**R1v + a** S<sub>N</sub>2@P-f pathways in THF

**RC**<sub>Va-r</sub>

E = -3759.239761      ZPVE = 0.174271      NIMAG = 0.

|    |           |           |           |
|----|-----------|-----------|-----------|
| 17 | -3.037822 | 1.194974  | -0.17046  |
| 6  | 1.134819  | 2.761103  | -0.601423 |
| 1  | 1.988089  | 3.19436   | -1.147499 |
| 1  | 0.286781  | 2.815472  | -1.303301 |
| 6  | 0.825305  | 3.637565  | 0.631948  |
| 1  | -0.046546 | 3.26548   | 1.186771  |
| 1  | 1.663361  | 3.652833  | 1.341535  |
| 1  | 0.6092    | 4.688671  | 0.379655  |
| 15 | -2.392538 | -0.763421 | 0.040221  |
| 12 | 1.5482    | 0.701805  | -0.22929  |
| 35 | 3.256859  | -1.085399 | 0.047987  |
| 6  | -3.1978   | -1.327587 | 1.572267  |
| 1  | -2.801824 | -0.768463 | 2.422668  |
| 1  | -4.28034  | -1.198418 | 1.511114  |
| 1  | -2.960593 | -2.388069 | 1.701256  |
| 6  | -3.202444 | -1.639058 | -1.334742 |



|   |           |           |           |
|---|-----------|-----------|-----------|
| 1 | -2.946816 | -2.699913 | -1.252623 |
| 1 | -4.286462 | -1.517357 | -1.286082 |
| 1 | -2.825678 | -1.254229 | -2.284767 |
| 5 | -0.471638 | -0.937635 | 0.057875  |
| 1 | -0.071233 | -0.635656 | -1.045384 |
| 1 | -0.055649 | -0.242739 | 0.962173  |
| 1 | -0.310795 | -2.111885 | 0.283249  |

**TS<sub>Va-r</sub>**

E = -3759.186368      ZPVE = 0.176492      NIMAG = 1.

|    |           |           |           |
|----|-----------|-----------|-----------|
| 17 | -1.736217 | -1.516868 | -1.298635 |
| 6  | -0.284191 | 1.061589  | -1.035577 |
| 1  | 0.437804  | 0.437073  | -1.596483 |
| 1  | -1.065737 | 1.218811  | -1.776346 |
| 6  | 0.344652  | 2.407232  | -0.625818 |
| 1  | -0.337247 | 3.015016  | -0.022662 |
| 1  | 1.266695  | 2.307111  | -0.033548 |
| 1  | 0.624141  | 3.002454  | -1.505594 |
| 15 | -2.02026  | 0.054738  | 0.322512  |
| 12 | 0.888639  | -0.091031 | 0.510152  |
| 35 | 3.262599  | -0.3083   | 0.059562  |
| 6  | -2.966809 | 1.583961  | -0.08022  |
| 1  | -2.334203 | 2.466485  | -0.137302 |
| 1  | -3.469405 | 1.438074  | -1.041073 |
| 1  | -3.72867  | 1.718573  | 0.692182  |
| 6  | -3.494117 | -0.961916 | 0.885109  |
| 1  | -3.924109 | -0.457841 | 1.757602  |
| 1  | -4.252519 | -1.052027 | 0.103486  |

|   |           |           |          |
|---|-----------|-----------|----------|
| 1 | -3.167347 | -1.96102  | 1.181136 |
| 5 | -0.922729 | 0.033358  | 1.957446 |
| 1 | -0.271118 | -1.00724  | 1.888114 |
| 1 | -0.205801 | 1.021828  | 1.923453 |
| 1 | -1.591084 | -0.010724 | 2.951486 |

**PC<sub>Va-r</sub>**

E = -3759.337496    ZPVE = 0.178328    NIMAG = 0.

|    |           |           |           |
|----|-----------|-----------|-----------|
| 17 | -1.089051 | 2.849077  | 0.246799  |
| 6  | 3.102934  | 0.94899   | 0.44416   |
| 1  | 2.62219   | 1.252357  | 1.381136  |
| 1  | 4.177278  | 0.867018  | 0.64562   |
| 6  | 2.833044  | 1.982061  | -0.6592   |
| 1  | 3.331006  | 1.714897  | -1.59607  |
| 1  | 1.763174  | 2.096654  | -0.852705 |
| 1  | 3.218093  | 2.957293  | -0.346691 |
| 15 | 2.491899  | -0.750383 | 0.079693  |
| 12 | -1.379464 | 0.553925  | 0.064873  |
| 35 | -3.300031 | -0.958495 | -0.095275 |
| 6  | 3.345729  | -1.322707 | -1.433669 |
| 1  | 3.015503  | -0.735037 | -2.293451 |
| 1  | 4.429322  | -1.22712  | -1.323262 |
| 1  | 3.091434  | -2.370852 | -1.610297 |
| 6  | 3.11454   | -1.802523 | 1.440462  |
| 1  | 2.816497  | -2.838453 | 1.260368  |
| 1  | 4.204266  | -1.74452  | 1.504608  |
| 1  | 2.678167  | -1.471745 | 2.386437  |
| 5  | 0.569044  | -0.936571 | -0.083871 |

|   |          |           |           |
|---|----------|-----------|-----------|
| 1 | 0.098053 | -0.555793 | 0.978902  |
| 1 | 0.203404 | -0.275264 | -1.043799 |
| 1 | 0.318965 | -2.09985  | -0.256785 |

**R1 + b** S<sub>N</sub>2@P-b pathways in THF

**RC<sub>1b-i</sub>**

E = -4570.591517    ZPVE = 0.521561    NIMAG = 0.

|   |          |           |           |
|---|----------|-----------|-----------|
| 6 | 2.901318 | 1.301643  | 0.548407  |
| 6 | 0.807641 | 2.767339  | 0.729101  |
| 6 | 2.755343 | 3.537883  | -0.749729 |
| 6 | 3.648989 | 2.540904  | 0.00334   |
| 6 | 1.586177 | 3.960761  | 0.152273  |
| 6 | 0.964642 | 0.61588   | 2.199414  |
| 6 | 3.566657 | 4.744636  | -1.237416 |
| 6 | 1.886899 | -0.136326 | 3.176382  |
| 6 | -0.26792 | 1.119879  | 2.972998  |
| 1 | 3.613185 | 0.733724  | 1.155772  |
| 1 | 0.057161 | 3.15154   | 1.425379  |
| 1 | 0.259745 | 2.258647  | -0.071107 |
| 1 | 2.339622 | 3.032501  | -1.632927 |
| 1 | 4.4955   | 2.237633  | -0.618018 |
| 1 | 4.07846  | 3.047327  | 0.880076  |
| 1 | 0.900296 | 4.61128   | -0.404845 |
| 1 | 1.98538  | 4.564934  | 0.981561  |
| 1 | 0.599822 | -0.100566 | 1.451039  |
| 1 | 4.376757 | 4.435621  | -1.907822 |
| 1 | 2.930676 | 5.451311  | -1.782348 |
| 1 | 4.016128 | 5.281941  | -0.392544 |

|    |           |           |           |
|----|-----------|-----------|-----------|
| 1  | 1.343134  | -0.953558 | 3.662128  |
| 1  | 2.760509  | -0.575377 | 2.688812  |
| 1  | 2.243568  | 0.540925  | 3.962854  |
| 1  | 0.006175  | 1.916293  | 3.67682   |
| 1  | -0.702285 | 0.300059  | 3.555189  |
| 1  | -1.04943  | 1.50589   | 2.31336   |
| 6  | 2.66598   | -1.601478 | -0.056249 |
| 6  | 3.908413  | -1.973184 | 0.487233  |
| 6  | 1.606555  | -2.521203 | -0.057628 |
| 6  | 4.083399  | -3.246373 | 1.028171  |
| 1  | 4.745596  | -1.281424 | 0.477276  |
| 6  | 1.786608  | -3.793648 | 0.49291   |
| 1  | 0.644617  | -2.260005 | -0.484508 |
| 6  | 3.020592  | -4.157778 | 1.035248  |
| 1  | 5.047286  | -3.527493 | 1.441428  |
| 1  | 0.959341  | -4.496782 | 0.486963  |
| 1  | 3.15848   | -5.148294 | 1.45843   |
| 17 | 3.962129  | 0.152293  | -2.174928 |
| 6  | 1.719375  | 1.764498  | 1.468951  |
| 1  | 2.229708  | 2.336288  | 2.262064  |
| 15 | 2.393611  | 0.05398   | -0.783305 |
| 12 | -3.164855 | -1.098466 | -1.003478 |
| 35 | -2.014324 | -3.258511 | -1.002341 |
| 6  | -4.269377 | 0.714434  | -1.070206 |
| 6  | -4.499507 | 0.741554  | 0.312333  |
| 6  | -4.79935  | 1.792266  | -1.78936  |
| 6  | -5.205184 | 1.731333  | 0.992742  |
| 6  | -5.518474 | 2.822988  | -1.156784 |
| 1  | -4.660141 | 1.846806  | -2.868297 |
| 6  | -5.719662 | 2.788689  | 0.224691  |

|   |           |           |           |
|---|-----------|-----------|-----------|
| 1 | -5.360771 | 1.708122  | 2.066361  |
| 1 | -5.919318 | 3.64767   | -1.740824 |
| 1 | -6.275822 | 3.581635  | 0.716988  |
| 8 | -3.906191 | -0.377092 | 0.942381  |
| 6 | -4.112917 | -0.615493 | 2.338737  |
| 1 | -5.181156 | -0.721012 | 2.55411   |
| 1 | -3.595052 | -1.546057 | 2.569785  |
| 1 | -3.690476 | 0.199775  | 2.934194  |
| 5 | 0.728569  | 0.202862  | -1.786738 |
| 1 | -0.158173 | 0.068259  | -0.971155 |
| 1 | 0.790347  | -0.706259 | -2.581368 |
| 1 | 0.739887  | 1.296625  | -2.296549 |

**TS<sub>lb-i</sub>**

E = -4570.527586    ZPVE = 0.522893    NIMAG = 1.

|   |           |           |           |
|---|-----------|-----------|-----------|
| 6 | -2.425475 | 0.935913  | 0.342109  |
| 6 | -3.050715 | -1.562585 | 0.67153   |
| 6 | -3.994535 | -0.285414 | -1.332145 |
| 6 | -3.638476 | 1.031436  | -0.624841 |
| 6 | -4.228839 | -1.395454 | -0.298933 |
| 6 | -1.653093 | -0.324794 | 2.522201  |
| 6 | -5.20847  | -0.096967 | -2.250904 |
| 6 | -1.873022 | 0.832496  | 3.51879   |
| 6 | -1.72727  | -1.648111 | 3.305584  |
| 1 | -2.406158 | 1.853383  | 0.931056  |
| 1 | -3.339764 | -2.283213 | 1.442075  |
| 1 | -2.196058 | -1.990991 | 0.148998  |
| 1 | -3.142491 | -0.577627 | -1.959699 |

|    |           |           |           |
|----|-----------|-----------|-----------|
| 1  | -3.492593 | 1.827712  | -1.357987 |
| 1  | -4.494524 | 1.342731  | -0.008367 |
| 1  | -4.424435 | -2.347111 | -0.809649 |
| 1  | -5.138307 | -1.15637  | 0.273998  |
| 1  | -0.64017  | -0.254439 | 2.111678  |
| 1  | -5.017467 | 0.668406  | -3.011465 |
| 1  | -5.45833  | -1.030707 | -2.767586 |
| 1  | -6.090678 | 0.2131    | -1.676258 |
| 1  | -1.073254 | 0.865959  | 4.267066  |
| 1  | -1.922529 | 1.816254  | 3.040805  |
| 1  | -2.820371 | 0.690663  | 4.05315   |
| 1  | -2.731578 | -1.813519 | 3.71452   |
| 1  | -1.031294 | -1.616553 | 4.151539  |
| 1  | -1.465587 | -2.513369 | 2.691312  |
| 6  | 0.68432   | 1.852024  | 0.106698  |
| 6  | 0.802337  | 2.054577  | 1.489047  |
| 6  | 1.783905  | 2.180827  | -0.718572 |
| 6  | 1.994218  | 2.535369  | 2.036086  |
| 1  | -0.031302 | 1.855526  | 2.14578   |
| 6  | 2.98422   | 2.643411  | -0.159301 |
| 1  | 1.681096  | 2.136227  | -1.800879 |
| 6  | 3.096539  | 2.810118  | 1.221212  |
| 1  | 2.061824  | 2.684721  | 3.109366  |
| 1  | 3.818809  | 2.876471  | -0.811936 |
| 1  | 4.024199  | 3.169115  | 1.654245  |
| 17 | -1.52103  | 3.576303  | -0.712897 |
| 6  | -2.67139  | -0.233972 | 1.34836   |
| 1  | -3.608202 | 0.112095  | 1.820043  |
| 15 | -0.852612 | 1.295149  | -0.763749 |
| 12 | 2.11102   | -0.253803 | -0.707522 |

|    |           |           |           |
|----|-----------|-----------|-----------|
| 35 | 4.480105  | -0.754441 | -0.914748 |
| 6  | 0.102948  | -1.185309 | -0.807813 |
| 6  | 0.592139  | -1.969136 | 0.258558  |
| 6  | -0.581732 | -1.90889  | -1.803358 |
| 6  | 0.392111  | -3.343145 | 0.397302  |
| 6  | -0.798266 | -3.288986 | -1.715943 |
| 1  | -0.958393 | -1.378719 | -2.6719   |
| 6  | -0.328579 | -3.998244 | -0.607184 |
| 1  | 0.799164  | -3.903332 | 1.231499  |
| 1  | -1.332577 | -3.807853 | -2.506463 |
| 1  | -0.498642 | -5.067852 | -0.527264 |
| 8  | 1.452981  | -1.234703 | 1.097982  |
| 6  | 2.170232  | -1.896122 | 2.1579    |
| 1  | 2.844572  | -2.654509 | 1.750954  |
| 1  | 2.742074  | -1.11769  | 2.661071  |
| 1  | 1.465784  | -2.347191 | 2.860211  |
| 5  | -0.726714 | 1.294685  | -2.780951 |
| 1  | 0.002486  | 0.397732  | -3.110828 |
| 1  | -0.277844 | 2.386651  | -3.017924 |
| 1  | -1.865605 | 1.160939  | -3.156653 |

**PC<sub>1b-i</sub>**

E = -4570.591642      ZPVE = 0.525111      NIMAG = 0.

|   |           |           |           |
|---|-----------|-----------|-----------|
| 6 | -2.46433  | 0.441823  | -0.044541 |
| 6 | -3.140404 | -1.674439 | 1.233879  |
| 6 | -4.310373 | -1.137971 | -0.978633 |
| 6 | -3.771152 | 0.297176  | -0.868578 |
| 6 | -4.43596  | -1.774268 | 0.413445  |

|   |           |           |           |
|---|-----------|-----------|-----------|
| 6 | -1.514201 | 0.06424   | 2.37145   |
| 6 | -5.642183 | -1.163589 | -1.739623 |
| 6 | -1.68554  | 1.45446   | 3.015541  |
| 6 | -1.393961 | -0.985066 | 3.490767  |
| 1 | -2.324969 | 1.521837  | 0.092079  |
| 1 | -3.329042 | -2.082003 | 2.231251  |
| 1 | -2.36239  | -2.303282 | 0.786271  |
| 1 | -3.589532 | -1.731947 | -1.557279 |
| 1 | -3.647728 | 0.732658  | -1.863321 |
| 1 | -4.518514 | 0.916605  | -0.353433 |
| 1 | -4.73656  | -2.825538 | 0.316934  |
| 1 | -5.243628 | -1.267673 | 0.963168  |
| 1 | -0.566309 | 0.061435  | 1.818407  |
| 1 | -5.531715 | -0.749472 | -2.748065 |
| 1 | -6.022508 | -2.187207 | -1.834758 |
| 1 | -6.402487 | -0.571103 | -1.215455 |
| 1 | -0.787629 | 1.743811  | 3.573716  |
| 1 | -1.907425 | 2.242231  | 2.289222  |
| 1 | -2.523045 | 1.433924  | 3.723884  |
| 1 | -2.322475 | -1.051855 | 4.069588  |
| 1 | -0.6004   | -0.697148 | 4.189688  |
| 1 | -1.163629 | -1.985652 | 3.111741  |
| 6 | 0.300554  | 1.341749  | -0.950683 |
| 6 | 0.189262  | 2.392537  | -0.034711 |
| 6 | 1.356642  | 1.387614  | -1.896137 |
| 6 | 1.107389  | 3.452483  | -0.037781 |
| 1 | -0.627048 | 2.435491  | 0.67198   |
| 6 | 2.263456  | 2.464193  | -1.908356 |
| 1 | 1.395179  | 0.656708  | -2.700224 |
| 6 | 2.146815  | 3.495933  | -0.965404 |



|    |                 |           |           |
|----|-----------------|-----------|-----------|
| 1  | 0.984472        | 4.255704  | 0.681078  |
| 1  | 3.031218        | 2.50623   | -2.675814 |
| 1  | 2.842636        | 4.327898  | -0.978946 |
| 17 | -2.936473       | 4.235773  | 0.436759  |
| 6  | -2.666561       | -0.211607 | 1.35841   |
| 1  | -3.537143       | 0.335325  | 1.753613  |
| 15 | -0.963852       | -0.001556 | -1.139462 |
| 12 | 3.059011        | 0.332158  | -0.480883 |
| 35 | 5.302281        | -0.208537 | 0.177289  |
| 6  | -0.126351       | -1.598061 | -0.69015  |
| 6  | 1.006141        | -1.798916 | 0.118568  |
| 6  | -0.677186       | -2.745761 | -1.296041 |
| 6  | 1.548855        | -3.067775 | 0.331042  |
| 6  | -0.163169       | -4.020974 | -1.073981 |
| 1  | -1.526558       | -2.630325 | -1.959281 |
| 6  | 0.950812        | -4.185016 | -0.249057 |
| 1  | 2.433696        | -3.182283 | 0.946951  |
| 1  | -0.628207       | -4.878275 | -1.549324 |
| 1  | 1.369603        | -5.170281 | -0.072228 |
| 8  | 1.664356        | -0.683538 | 0.686731  |
| 6  | 2.0275 -0.79807 | 2.105587  |           |
| 1  | 2.982045        | -1.31488  | 2.208434  |
| 1  | 2.105924        | 0.22358   | 2.477645  |
| 1  | 1.236055        | -1.330343 | 2.629321  |
| 5  | -1.373104       | -0.052374 | -3.068053 |
| 1  | -0.318448       | -0.348272 | -3.58725  |
| 1  | -1.730915       | 1.071681  | -3.336195 |
| 1  | -2.228344       | -0.883465 | -3.254559 |

P1b-i

E = -1338.437486      ZPVE = 0.520185      NIMAG = 0.

|   |           |           |           |
|---|-----------|-----------|-----------|
| 6 | -0.654312 | -0.950892 | -0.617537 |
| 6 | -2.246688 | -2.587895 | 0.561648  |
| 6 | 0.168734  | -3.306588 | 0.11535   |
| 6 | 0.263604  | -2.165628 | -0.909488 |
| 6 | -1.293174 | -3.753249 | 0.25595   |
| 6 | -3.189614 | -0.31365  | -0.318214 |
| 6 | 1.0863    | -4.472758 | -0.273739 |
| 6 | -3.315727 | 0.505321  | -1.616241 |
| 6 | -4.584954 | -0.834947 | 0.071627  |
| 1 | -0.595667 | -0.297192 | -1.491372 |
| 1 | -3.270506 | -2.973318 | 0.560579  |
| 1 | -2.054569 | -2.204105 | 1.567956  |
| 1 | 0.502485  | -2.925133 | 1.089931  |
| 1 | 1.302598  | -1.848331 | -1.022305 |
| 1 | -0.042803 | -2.557135 | -1.891421 |
| 1 | -1.378216 | -4.515901 | 1.040965  |
| 1 | -1.60324  | -4.237035 | -0.683777 |
| 1 | -2.866887 | 0.360977  | 0.484147  |
| 1 | 2.13277   | -4.152844 | -0.339323 |
| 1 | 1.028475  | -5.282147 | 0.46314   |
| 1 | 0.800618  | -4.888268 | -1.248847 |
| 1 | -3.709498 | -0.123384 | -2.425418 |
| 1 | -4.007268 | 1.343923  | -1.479396 |
| 1 | -2.362402 | 0.922482  | -1.949297 |
| 1 | -4.944851 | -1.584401 | -0.645232 |
| 1 | -5.303759 | -0.007929 | 0.072665  |
| 1 | -4.600133 | -1.284441 | 1.068152  |

|    |           |           |           |
|----|-----------|-----------|-----------|
| 6  | -0.536979 | 1.880999  | 0.447321  |
| 6  | -1.106619 | 2.610413  | 1.50511   |
| 6  | -0.393526 | 2.509225  | -0.801847 |
| 6  | -1.522496 | 3.931877  | 1.318253  |
| 1  | -1.227168 | 2.145891  | 2.476509  |
| 6  | -0.808268 | 3.830321  | -0.98593  |
| 1  | 0.053745  | 1.974273  | -1.62952  |
| 6  | -1.374478 | 4.54658   | 0.072651  |
| 1  | -1.961755 | 4.477066  | 2.148651  |
| 1  | -0.688238 | 4.298138  | -1.958963 |
| 1  | -1.69708  | 5.573472  | -0.072775 |
| 6  | -2.132793 | -1.447045 | -0.472753 |
| 1  | -2.339908 | -1.910666 | -1.453092 |
| 15 | 0.019083  | 0.145044  | 0.78098   |
| 5  | -0.455864 | -0.339144 | 2.627145  |
| 1  | 0.077338  | 0.483258  | 3.340774  |
| 1  | -1.662564 | -0.27426  | 2.693098  |
| 1  | -0.037555 | -1.456992 | 2.824188  |
| 6  | 2.617695  | 0.017295  | 1.776125  |
| 6  | 4.014086  | 0.070121  | 1.769822  |
| 6  | 4.681921  | 0.297075  | 0.56821   |
| 6  | 3.963317  | 0.463879  | -0.618431 |
| 6  | 2.563025  | 0.40925   | -0.60759  |
| 6  | 1.863338  | 0.188338  | 0.60506   |
| 1  | 2.098252  | -0.157505 | 2.710476  |
| 1  | 4.565679  | -0.065487 | 2.694511  |
| 1  | 5.766675  | 0.343392  | 0.54115   |
| 1  | 4.499029  | 0.633028  | -1.544109 |
| 8  | 1.812992  | 0.545092  | -1.738874 |
| 6  | 2.467669  | 0.737346  | -2.996796 |

|   |          |           |           |
|---|----------|-----------|-----------|
| 1 | 3.050345 | 1.66454   | -3.001054 |
| 1 | 3.116016 | -0.111941 | -3.236451 |
| 1 | 1.668801 | 0.804967  | -3.735335 |

**R1<sub>II</sub> + b S<sub>N</sub>2@P-b pathways in THF**

**RC<sub>IIb-i</sub>**

E = -4262.103979      ZPVE = 0.403442      NIMAG = 0.

|    |           |           |           |
|----|-----------|-----------|-----------|
| 15 | 2.367853  | -0.064366 | 0.224308  |
| 17 | 3.01703   | 0.209893  | 2.181969  |
| 6  | 3.805687  | 0.569379  | -0.845219 |
| 6  | 3.259037  | 0.757718  | -2.281074 |
| 1  | 4.073931  | 1.146421  | -2.901659 |
| 1  | 2.920077  | -0.176712 | -2.733684 |
| 1  | 2.439356  | 1.479194  | -2.315179 |
| 6  | 5.019106  | -0.376766 | -0.856121 |
| 1  | 5.831545  | 0.116026  | -1.401691 |
| 1  | 5.383284  | -0.593689 | 0.15209   |
| 1  | 4.808386  | -1.318105 | -1.368597 |
| 6  | 4.241749  | 1.946496  | -0.294215 |
| 1  | 4.956584  | 2.378469  | -1.003028 |
| 1  | 3.404254  | 2.641127  | -0.196682 |
| 1  | 4.7393    | 1.859932  | 0.674202  |
| 12 | -1.734895 | 0.954135  | -0.426317 |
| 35 | -2.21633  | 3.374543  | -0.230801 |
| 6  | -2.683121 | -0.884597 | -0.982225 |
| 6  | -3.163991 | -1.160586 | 0.306135  |
| 6  | -3.051711 | -1.810911 | -1.966743 |
| 6  | -3.963235 | -2.247953 | 0.65484   |
| 6  | -3.848323 | -2.933599 | -1.674157 |

|   |           |           |           |
|---|-----------|-----------|-----------|
| 1 | -2.722463 | -1.66836  | -2.995766 |
| 6 | -4.301874 | -3.146122 | -0.370346 |
| 1 | -4.31841  | -2.413631 | 1.666913  |
| 1 | -4.118774 | -3.633378 | -2.461239 |
| 1 | -4.923686 | -4.006825 | -0.139595 |
| 8 | -2.723335 | -0.184772 | 1.226361  |
| 6 | -3.26516  | -0.142208 | 2.549861  |
| 1 | -2.804534 | 0.714286  | 3.041982  |
| 1 | -4.351752 | -0.010204 | 2.514441  |
| 1 | -3.017598 | -1.05645  | 3.098604  |
| 6 | 2.035211  | -1.933797 | 0.144156  |
| 6 | 3.185505  | -2.785117 | 0.716217  |
| 1 | 2.877658  | -3.835656 | 0.672487  |
| 1 | 4.110865  | -2.69029  | 0.147889  |
| 1 | 3.391564  | -2.544186 | 1.761772  |
| 6 | 0.761866  | -2.190709 | 0.982251  |
| 1 | -0.120628 | -1.711467 | 0.55479   |
| 1 | 0.577764  | -3.270619 | 0.993612  |
| 1 | 0.876122  | -1.860665 | 2.018738  |
| 6 | 1.764549  | -2.320348 | -1.327179 |
| 1 | 0.984663  | -1.705709 | -1.785436 |
| 1 | 2.665724  | -2.269901 | -1.943426 |
| 1 | 1.414016  | -3.358162 | -1.344121 |
| 5 | 0.795615  | 1.058775  | -0.019337 |
| 1 | 1.165173  | 2.199764  | -0.015371 |
| 1 | 0.038329  | 0.821886  | 0.89826   |
| 1 | 0.339093  | 0.74461   | -1.105837 |

E = -4262.032959      ZPVE = 0.405402      NIMAG = 1.

|    |           |           |           |
|----|-----------|-----------|-----------|
| 15 | 1.60179   | -0.399169 | -0.141746 |
| 17 | 3.364212  | -1.485907 | -1.648422 |
| 6  | 2.520555  | -1.072221 | 1.461902  |
| 6  | 1.782589  | -0.754286 | 2.772556  |
| 1  | 2.276986  | -1.317261 | 3.572611  |
| 1  | 1.854286  | 0.301444  | 3.037276  |
| 1  | 0.735072  | -1.062938 | 2.755584  |
| 6  | 3.946632  | -0.503059 | 1.572808  |
| 1  | 4.432676  | -0.985709 | 2.429269  |
| 1  | 4.544698  | -0.706612 | 0.684426  |
| 1  | 3.941536  | 0.572136  | 1.768285  |
| 6  | 2.585802  | -2.613579 | 1.343157  |
| 1  | 3.15701   | -2.979341 | 2.204599  |
| 1  | 1.594578  | -3.06998  | 1.387206  |
| 1  | 3.086236  | -2.943616 | 0.43438   |
| 12 | -1.661051 | -1.059528 | -0.15722  |
| 35 | -4.032593 | -1.584122 | 0.036884  |
| 6  | -0.515308 | 0.778312  | 0.732927  |
| 6  | -1.415752 | 1.403242  | -0.170493 |
| 6  | -0.509085 | 1.373206  | 2.0132    |
| 6  | -2.170757 | 2.5433    | 0.113663  |
| 6  | -1.256727 | 2.508239  | 2.343456  |
| 1  | 0.110067  | 0.962398  | 2.7942    |
| 6  | -2.067222 | 3.112911  | 1.383279  |
| 1  | -2.843569 | 2.970942  | -0.619928 |
| 1  | -1.196387 | 2.918871  | 3.346969  |
| 1  | -2.641628 | 4.002943  | 1.621086  |
| 8  | -1.598142 | 0.695326  | -1.369224 |

|   |           |           |           |
|---|-----------|-----------|-----------|
| 6 | -2.512459 | 1.177093  | -2.374594 |
| 1 | -2.438857 | 0.467522  | -3.198029 |
| 1 | -3.534165 | 1.200013  | -1.987251 |
| 1 | -2.203724 | 2.16905   | -2.712763 |
| 6 | 2.191578  | 1.375046  | -0.882517 |
| 6 | 3.724749  | 1.534284  | -1.004753 |
| 1 | 3.887701  | 2.453903  | -1.579384 |
| 1 | 4.201623  | 1.674046  | -0.033914 |
| 1 | 4.20805   | 0.716508  | -1.529205 |
| 6 | 1.561998  | 1.434276  | -2.28662  |
| 1 | 0.476999  | 1.326858  | -2.261173 |
| 1 | 1.794142  | 2.413397  | -2.72315  |
| 1 | 1.977925  | 0.663563  | -2.939736 |
| 6 | 1.732404  | 2.572158  | -0.024509 |
| 1 | 0.664339  | 2.760034  | -0.068721 |
| 1 | 2.030012  | 2.473544  | 1.022532  |
| 1 | 2.238305  | 3.459009  | -0.422831 |
| 5 | 0.424905  | -1.873437 | -0.875043 |
| 1 | 1.034148  | -2.799452 | -1.300941 |
| 1 | -0.308412 | -1.394956 | -1.709927 |
| 1 | -0.158125 | -2.24872  | 0.141814  |

**PC<sub>11b-i</sub>**

E = -4262.128108      ZPVE = 0.408152      NIMAG = 0.

|    |             |              |              |
|----|-------------|--------------|--------------|
| 15 | 1.272277000 | 0.303241000  | 0.266117000  |
| 17 | 5.862812000 | -2.992596000 | -1.357291000 |
| 6  | 2.178893000 | -0.465166000 | 1.786568000  |
| 6  | 1.112515000 | -0.905881000 | 2.815825000  |

|    |              |              |              |
|----|--------------|--------------|--------------|
| 1  | 1.612609000  | -1.512563000 | 3.578741000  |
| 1  | 0.632980000  | -0.066016000 | 3.321157000  |
| 1  | 0.332979000  | -1.526367000 | 2.364350000  |
| 6  | 3.213043000  | 0.460405000  | 2.463634000  |
| 1  | 3.616378000  | -0.073975000 | 3.330839000  |
| 1  | 4.055612000  | 0.685783000  | 1.806703000  |
| 1  | 2.802560000  | 1.401411000  | 2.833167000  |
| 6  | 2.932188000  | -1.730856000 | 1.307727000  |
| 1  | 3.507852000  | -2.111358000 | 2.158415000  |
| 1  | 2.249525000  | -2.519907000 | 0.990336000  |
| 1  | 3.636989000  | -1.543264000 | 0.495302000  |
| 12 | -1.726845000 | -1.286513000 | -0.981300000 |
| 35 | -3.890168000 | -1.749755000 | 0.006510000  |
| 6  | -0.103226000 | 1.381832000  | 0.898543000  |
| 6  | -1.366635000 | 1.521478000  | 0.284076000  |
| 6  | 0.112024000  | 2.151667000  | 2.058789000  |
| 6  | -2.362992000 | 2.334162000  | 0.828754000  |
| 6  | -0.864813000 | 2.984259000  | 2.599855000  |
| 1  | 1.071339000  | 2.111718000  | 2.553837000  |
| 6  | -2.114468000 | 3.065899000  | 1.987734000  |
| 1  | -3.332232000 | 2.396579000  | 0.349495000  |
| 1  | -0.646449000 | 3.558196000  | 3.494079000  |
| 1  | -2.895550000 | 3.694580000  | 2.402496000  |
| 8  | -1.635192000 | 0.828411000  | -0.902695000 |
| 6  | -2.428050000 | 1.528994000  | -1.911095000 |
| 1  | -2.204689000 | 1.036752000  | -2.858431000 |
| 1  | -3.491494000 | 1.444694000  | -1.682636000 |
| 1  | -2.115901000 | 2.572494000  | -1.953006000 |
| 6  | 2.362474000  | 1.444146000  | -0.807197000 |
| 6  | 3.626907000  | 0.680257000  | -1.251545000 |



|   |              |              |              |
|---|--------------|--------------|--------------|
| 1 | 4.171934000  | 1.307259000  | -1.965946000 |
| 1 | 4.304798000  | 0.470473000  | -0.421715000 |
| 1 | 3.393892000  | -0.263215000 | -1.751141000 |
| 6 | 1.532296000  | 1.816256000  | -2.056128000 |
| 1 | 0.617934000  | 2.357520000  | -1.796608000 |
| 1 | 2.139082000  | 2.479440000  | -2.682358000 |
| 1 | 1.268899000  | 0.942317000  | -2.656101000 |
| 6 | 2.751985000  | 2.744981000  | -0.077429000 |
| 1 | 1.876170000  | 3.331001000  | 0.213644000  |
| 1 | 3.365363000  | 2.570148000  | 0.807474000  |
| 1 | 3.342674000  | 3.357094000  | -0.768289000 |
| 5 | 0.643867000  | -1.232049000 | -0.794994000 |
| 1 | 1.567954000  | -1.909996000 | -1.125185000 |
| 1 | 0.068597000  | -0.851326000 | -1.798694000 |
| 1 | -0.066348000 | -1.887561000 | -0.036624000 |

**P11b-i**

E = -1029.936084      ZPVE = 0.401078      NIMAG = 0.

|    |           |           |           |
|----|-----------|-----------|-----------|
| 15 | 0.726051  | 0.358605  | 0.309968  |
| 5  | 0.712831  | 1.81289   | 1.653131  |
| 1  | 0.031737  | 2.718779  | 1.244577  |
| 1  | 0.293489  | 1.332007  | 2.684709  |
| 1  | 1.880392  | 2.128977  | 1.747567  |
| 6  | -0.917407 | -0.351504 | -0.197239 |
| 6  | -2.163647 | 0.199727  | 0.205348  |
| 6  | -0.960144 | -1.497784 | -1.010794 |
| 6  | -3.370158 | -0.395622 | -0.204172 |
| 6  | -2.154515 | -2.092863 | -1.418346 |

|   |           |           |           |
|---|-----------|-----------|-----------|
| 1 | -0.035323 | -1.948469 | -1.341715 |
| 6 | -3.364215 | -1.53326  | -1.009233 |
| 1 | -4.316538 | 0.028597  | 0.106435  |
| 1 | -2.132923 | -2.978284 | -2.045421 |
| 1 | -4.308236 | -1.976583 | -1.312463 |
| 8 | -2.135738 | 1.305459  | 0.986667  |
| 6 | -3.357514 | 1.893672  | 1.431569  |
| 1 | -3.936071 | 1.193891  | 2.045099  |
| 1 | -3.061254 | 2.750046  | 2.03745   |
| 1 | -3.965725 | 2.23631   | 0.586792  |
| 6 | 1.496088  | 1.02504   | -1.318874 |
| 6 | 1.438793  | 0.062448  | -2.521572 |
| 1 | 1.961116  | -0.87995  | -2.34465  |
| 1 | 0.412005  | -0.15756  | -2.822024 |
| 1 | 1.929269  | 0.551767  | -3.371922 |
| 6 | 2.964708  | 1.427756  | -1.064955 |
| 1 | 3.064834  | 2.096609  | -0.207144 |
| 1 | 3.610335  | 0.559278  | -0.907332 |
| 1 | 3.339146  | 1.955563  | -1.950333 |
| 6 | 0.68437   | 2.290088  | -1.683522 |
| 1 | 1.071517  | 2.694332  | -2.626674 |
| 1 | -0.377054 | 2.063673  | -1.829735 |
| 1 | 0.767332  | 3.063441  | -0.917736 |
| 6 | 1.717701  | -1.116092 | 1.069641  |
| 6 | 2.865974  | -0.542674 | 1.933323  |
| 1 | 3.579345  | 0.04343   | 1.349108  |
| 1 | 2.491805  | 0.086347  | 2.74158   |
| 1 | 3.410887  | -1.384847 | 2.376666  |
| 6 | 2.339032  | -2.109547 | 0.066335  |
| 1 | 1.602199  | -2.616122 | -0.559303 |

|   |           |           |           |
|---|-----------|-----------|-----------|
| 1 | 3.081591  | -1.637238 | -0.581394 |
| 1 | 2.858411  | -2.888707 | 0.637573  |
| 6 | 0.75002   | -1.875405 | 2.005799  |
| 1 | -0.029453 | -2.406341 | 1.454245  |
| 1 | 1.324509  | -2.616464 | 2.574541  |
| 1 | 0.269134  | -1.203551 | 2.723135  |

**R1<sub>III</sub> + b S<sub>N</sub>2@P-b pathways in THF**

**RC<sub>IIIb-i</sub>**

E = -4409.698841      ZPVE = 0.339478      NIMAG = 0.

|    |           |           |           |
|----|-----------|-----------|-----------|
| 15 | 2.224745  | -0.904461 | -0.776875 |
| 6  | 1.985244  | -1.457733 | 0.939152  |
| 6  | 0.855058  | -2.23466  | 1.240646  |
| 6  | 2.914894  | -1.153563 | 1.94909   |
| 6  | 0.650844  | -2.690877 | 2.545591  |
| 1  | 0.143926  | -2.488152 | 0.461937  |
| 6  | 2.708245  | -1.617695 | 3.247415  |
| 1  | 3.795619  | -0.559959 | 1.724515  |
| 6  | 1.575132  | -2.38351  | 3.546925  |
| 1  | -0.224748 | -3.289962 | 2.775192  |
| 1  | 3.428055  | -1.380966 | 4.02478   |
| 1  | 1.416675  | -2.741631 | 4.559713  |
| 17 | 3.907874  | -1.976637 | -1.412952 |
| 6  | -2.452492 | 3.530399  | 0.166312  |
| 6  | -2.644969 | 2.155096  | 0.056369  |
| 6  | -2.72205  | 1.260061  | 1.132362  |
| 6  | -2.600512 | 1.833571  | 2.403434  |
| 6  | -2.406049 | 3.216408  | 2.577312  |
| 6  | -2.331345 | 4.055404  | 1.463426  |

|    |           |           |           |
|----|-----------|-----------|-----------|
| 1  | -2.39503  | 4.185657  | -0.696663 |
| 1  | -2.312286 | 3.634435  | 3.576453  |
| 1  | -2.180464 | 5.123792  | 1.591442  |
| 12 | -2.998841 | -0.441669 | -0.10652  |
| 35 | -3.564661 | -2.653183 | -0.97249  |
| 1  | -2.650201 | 1.204061  | 3.291047  |
| 8  | -2.787898 | 1.47543   | -1.173784 |
| 6  | -2.674608 | 2.187127  | -2.411628 |
| 1  | -2.794819 | 1.447769  | -3.20286  |
| 1  | -3.460264 | 2.945223  | -2.490311 |
| 1  | -1.689634 | 2.657347  | -2.492047 |
| 6  | 2.816814  | 0.822572  | -0.704626 |
| 6  | 2.247486  | 1.700624  | 0.233254  |
| 6  | 3.717329  | 1.317826  | -1.660899 |
| 6  | 2.587763  | 3.055323  | 0.218039  |
| 1  | 1.542922  | 1.338038  | 0.974649  |
| 6  | 4.056125  | 2.672165  | -1.666699 |
| 1  | 4.161082  | 0.652862  | -2.39411  |
| 6  | 3.493187  | 3.542435  | -0.728367 |
| 1  | 2.14553   | 3.72539   | 0.948658  |
| 1  | 4.759775  | 3.044725  | -2.404718 |
| 1  | 3.758597  | 4.595241  | -0.735322 |
| 5  | 0.734411  | -1.17375  | -1.982747 |
| 1  | -0.109413 | -0.453595 | -1.485013 |
| 1  | 1.1296    | -0.762274 | -3.048693 |
| 1  | 0.453823  | -2.347321 | -1.968588 |

**TS<sub>imb-i</sub>**

E = -4409.675785    ZPVE = 0.341971    NIMAG = 1.

|    |           |           |           |
|----|-----------|-----------|-----------|
| 15 | 1.255779  | -0.246111 | -1.004591 |
| 6  | 1.864317  | -1.661515 | -0.021068 |
| 6  | 1.100202  | -2.837472 | 0.012249  |
| 6  | 3.110181  | -1.629251 | 0.624891  |
| 6  | 1.572531  | -3.963873 | 0.689715  |
| 1  | 0.136517  | -2.884592 | -0.48074  |
| 6  | 3.569783  | -2.752518 | 1.314122  |
| 1  | 3.735326  | -0.74531  | 0.57287   |
| 6  | 2.804998  | -3.922942 | 1.345932  |
| 1  | 0.972673  | -4.868483 | 0.703093  |
| 1  | 4.533139  | -2.715322 | 1.813271  |
| 1  | 3.170172  | -4.797963 | 1.874895  |
| 17 | 3.101532  | -0.268415 | -2.381119 |
| 6  | -1.71883  | 1.851023  | 2.033502  |
| 6  | -1.369635 | 1.203954  | 0.849979  |
| 6  | -0.604645 | 0.021025  | 0.772827  |
| 6  | -0.241338 | -0.524571 | 2.016574  |
| 6  | -0.577827 | 0.081847  | 3.233479  |
| 6  | -1.295427 | 1.279516  | 3.238802  |
| 1  | -2.311798 | 2.758433  | 2.039367  |
| 1  | -0.275141 | -0.376083 | 4.170875  |
| 1  | -1.549397 | 1.764773  | 4.17659   |
| 12 | -1.935331 | -0.428707 | -1.003078 |
| 35 | -4.180105 | -1.258853 | -0.525604 |
| 1  | 0.332931  | -1.445042 | 2.051339  |
| 8  | -1.850048 | 1.614161  | -0.407856 |
| 6  | -2.776473 | 2.711236  | -0.50579  |
| 1  | -3.016754 | 2.803434  | -1.564371 |
| 1  | -3.682925 | 2.502251  | 0.068909  |

|   |           |           |           |
|---|-----------|-----------|-----------|
| 1 | -2.303747 | 3.631504  | -0.154358 |
| 6 | 1.667858  | 1.431416  | -0.395938 |
| 6 | 2.18006   | 1.674817  | 0.885629  |
| 6 | 1.46624   | 2.502201  | -1.279899 |
| 6 | 2.49823   | 2.977994  | 1.272441  |
| 1 | 2.311509  | 0.864598  | 1.592888  |
| 6 | 1.768449  | 3.805228  | -0.879192 |
| 1 | 1.078559  | 2.327079  | -2.278323 |
| 6 | 2.290716  | 4.046161  | 0.394723  |
| 1 | 2.897807  | 3.156245  | 2.266159  |
| 1 | 1.603592  | 4.628164  | -1.568012 |
| 1 | 2.532796  | 5.058975  | 0.70221   |
| 5 | -0.060844 | -0.583417 | -2.45281  |
| 1 | -0.769914 | 0.402146  | -2.500889 |
| 1 | 0.476534  | -0.780838 | -3.498104 |
| 1 | -0.6587   | -1.586773 | -2.097681 |

**PC<sub>IIIb-i</sub>**

E = -4409.786016    ZPVE = 0.343290    NIMAG = 0.

|    |          |           |           |
|----|----------|-----------|-----------|
| 15 | 1.071145 | -0.012053 | -0.402716 |
| 6  | 2.283143 | -1.343485 | -0.733365 |
| 6  | 1.83843  | -2.507241 | -1.383902 |
| 6  | 3.633549 | -1.224524 | -0.371999 |
| 6  | 2.734987 | -3.541572 | -1.65709  |
| 1  | 0.799046 | -2.608665 | -1.679875 |
| 6  | 4.527343 | -2.26186  | -0.651588 |
| 1  | 3.993407 | -0.326745 | 0.119629  |
| 6  | 4.07978  | -3.420104 | -1.292367 |

|    |           |           |           |
|----|-----------|-----------|-----------|
| 1  | 2.383524  | -4.437107 | -2.160061 |
| 1  | 5.571305  | -2.160622 | -0.371191 |
| 1  | 4.776119  | -4.224164 | -1.510643 |
| 17 | -3.616337 | 2.339018  | -1.877435 |
| 6  | -1.543546 | -0.171778 | 2.800775  |
| 6  | -0.91962  | 0.164529  | 1.601835  |
| 6  | 0.272719  | -0.456313 | 1.193744  |
| 6  | 0.823829  | -1.438504 | 2.033334  |
| 6  | 0.21752   | -1.770094 | 3.245435  |
| 6  | -0.966276 | -1.136128 | 3.628176  |
| 1  | -2.47515  | 0.306075  | 3.081111  |
| 1  | 0.664052  | -2.527896 | 3.880749  |
| 1  | -1.451662 | -1.397827 | 4.562846  |
| 12 | -2.510568 | 0.475279  | -1.041129 |
| 35 | -3.615253 | -1.62719  | -0.368995 |
| 1  | 1.735243  | -1.946104 | 1.738089  |
| 8  | -1.497236 | 1.107747  | 0.744255  |
| 6  | -1.800809 | 2.411846  | 1.329514  |
| 1  | -2.075438 | 3.053289  | 0.494136  |
| 1  | -2.637168 | 2.327501  | 2.025216  |
| 1  | -0.909137 | 2.787952  | 1.833213  |
| 6  | 2.019403  | 1.523398  | -0.111245 |
| 6  | 2.457262  | 1.893689  | 1.16984   |
| 6  | 2.328556  | 2.337503  | -1.21387  |
| 6  | 3.198646  | 3.065231  | 1.343928  |
| 1  | 2.220163  | 1.277347  | 2.031215  |
| 6  | 3.073392  | 3.504625  | -1.034062 |
| 1  | 1.988036  | 2.0657    | -2.208033 |
| 6  | 3.508053  | 3.870193  | 0.243876  |
| 1  | 3.531514  | 3.346926  | 2.338248  |

|   |           |           |           |
|---|-----------|-----------|-----------|
| 1 | 3.307199  | 4.129346  | -1.890525 |
| 1 | 4.082672  | 4.781047  | 0.382039  |
| 5 | -0.170794 | 0.161873  | -1.908612 |
| 1 | -0.666416 | 1.265581  | -1.838499 |
| 1 | 0.445231  | 0.029011  | -2.930279 |
| 1 | -0.977622 | -0.742655 | -1.788646 |

**P<sub>imag</sub>-i**

E = -1177.551727    ZPVE = 0.337342    NIMAG = 0.

|    |           |           |           |
|----|-----------|-----------|-----------|
| 15 | -0.246931 | 0.026772  | 0.839106  |
| 6  | -1.976833 | -0.310208 | 0.303153  |
| 6  | -2.810115 | -1.065671 | 1.144619  |
| 6  | -2.488815 | 0.169315  | -0.913547 |
| 6  | -4.127626 | -1.343678 | 0.770287  |
| 1  | -2.431526 | -1.432355 | 2.09257   |
| 6  | -3.807044 | -0.107817 | -1.283994 |
| 1  | -1.86597  | 0.764892  | -1.572844 |
| 6  | -4.628567 | -0.86568  | -0.443797 |
| 1  | -4.761375 | -1.928151 | 1.430644  |
| 1  | -4.191351 | 0.272054  | -2.22602  |
| 1  | -5.653988 | -1.077892 | -0.731796 |
| 6  | 2.954326  | -2.234763 | -0.472778 |
| 6  | 2.177334  | -1.222853 | 0.106834  |
| 6  | 0.765886  | -1.254079 | -0.006199 |
| 6  | 0.173341  | -2.314633 | -0.704166 |
| 6  | 0.945184  | -3.327509 | -1.280994 |
| 6  | 2.333796  | -3.281202 | -1.160967 |
| 1  | 4.034074  | -2.214111 | -0.391281 |



|   |           |           |           |
|---|-----------|-----------|-----------|
| 1 | 0.462463  | -4.139339 | -1.815232 |
| 1 | 2.94766   | -4.06046  | -1.603072 |
| 1 | -0.906215 | -2.353919 | -0.797766 |
| 8 | 2.697782  | -0.16676  | 0.784899  |
| 6 | 4.112672  | -0.082298 | 0.97295   |
| 1 | 4.276399  | 0.825389  | 1.553144  |
| 1 | 4.48734   | -0.94752  | 1.530366  |
| 1 | 4.633502  | -0.003249 | 0.012495  |
| 6 | 0.185526  | 1.632225  | 0.05914   |
| 6 | 0.714975  | 1.715011  | -1.237712 |
| 6 | -0.042036 | 2.811998  | 0.785083  |
| 6 | 1.005665  | 2.959549  | -1.802397 |
| 1 | 0.9096    | 0.810914  | -1.806726 |
| 6 | 0.246961  | 4.05553   | 0.216736  |
| 1 | -0.439145 | 2.759985  | 1.79374   |
| 6 | 0.770549  | 4.131788  | -1.077257 |
| 1 | 1.417328  | 3.011377  | -2.806102 |
| 1 | 0.068171  | 4.961814  | 0.787722  |
| 1 | 0.99824   | 5.098491  | -1.516721 |
| 5 | -0.1157   | 0.026433  | 2.795568  |
| 1 | 1.009183  | 0.365744  | 3.073824  |
| 1 | -0.962963 | 0.810144  | 3.170488  |
| 1 | -0.362296 | -1.113627 | 3.12899   |

**R1<sub>IV</sub> + b S<sub>N</sub>2@P-b pathways in THF**

**RC<sub>IVb-i</sub>**

E = -4217.960106      ZPVE = 0.287008      NIMAG = 0.

17    -2.477381000    -1.499586000    2.431688000

15    -1.925317000    -0.502476000    0.689744000

|    |              |              |              |
|----|--------------|--------------|--------------|
| 12 | 1.859925000  | 0.373992000  | -0.531104000 |
| 35 | 3.101719000  | -1.266324000 | -1.884099000 |
| 6  | -1.996474000 | 1.249293000  | 1.181995000  |
| 1  | -2.989394000 | 1.527562000  | 1.538899000  |
| 1  | -1.261169000 | 1.421961000  | 1.970547000  |
| 1  | -1.728553000 | 1.854086000  | 0.310837000  |
| 6  | -3.268476000 | -0.808792000 | -0.490326000 |
| 6  | -3.025413000 | -1.655252000 | -1.585250000 |
| 6  | -4.531433000 | -0.209894000 | -0.336890000 |
| 6  | -4.036483000 | -1.894177000 | -2.518702000 |
| 1  | -2.055640000 | -2.123777000 | -1.711695000 |
| 6  | -5.535597000 | -0.453866000 | -1.272932000 |
| 1  | -4.740618000 | 0.439227000  | 0.507068000  |
| 6  | -5.288790000 | -1.294497000 | -2.364239000 |
| 1  | -3.842249000 | -2.545744000 | -3.364689000 |
| 1  | -6.508730000 | 0.011169000  | -1.150855000 |
| 1  | -6.072657000 | -1.480185000 | -3.092177000 |
| 6  | 1.480145000  | 2.427759000  | -0.091488000 |
| 6  | 2.064557000  | 2.384672000  | 1.182277000  |
| 6  | 0.949344000  | 3.669644000  | -0.462294000 |
| 6  | 2.136816000  | 3.452275000  | 2.075370000  |
| 6  | 0.987307000  | 4.783822000  | 0.396949000  |
| 1  | 0.483441000  | 3.790566000  | -1.440041000 |
| 6  | 1.578529000  | 4.671800000  | 1.657282000  |
| 1  | 2.600058000  | 3.369964000  | 3.053379000  |
| 1  | 0.563102000  | 5.733910000  | 0.081352000  |
| 1  | 1.614354000  | 5.528916000  | 2.324200000  |
| 8  | 2.578895000  | 1.097814000  | 1.451865000  |
| 6  | 3.211100000  | 0.819210000  | 2.704709000  |
| 1  | 2.515200000  | 0.987872000  | 3.533185000  |

|   |              |              |              |
|---|--------------|--------------|--------------|
| 1 | 3.499823000  | -0.231313000 | 2.675593000  |
| 1 | 4.101106000  | 1.443867000  | 2.832911000  |
| 5 | -0.191477000 | -1.130095000 | 0.101918000  |
| 1 | 0.594399000  | -0.779329000 | 0.956754000  |
| 1 | -0.049164000 | -0.568619000 | -0.967893000 |
| 1 | -0.233307000 | -2.321990000 | -0.031732000 |

**TS<sub>IVb-i</sub>**

E = -4217.936224    ZPVE = 0.287331    NIMAG = 1.

|    |           |           |           |
|----|-----------|-----------|-----------|
| 17 | -2.829238 | -2.220301 | 1.933839  |
| 15 | -1.320885 | -0.806055 | 0.892757  |
| 12 | 1.675545  | -0.743124 | -0.285877 |
| 35 | 3.856603  | -1.193152 | -1.291152 |
| 6  | -1.252677 | 0.303863  | 2.365747  |
| 1  | -2.05976  | 0.054962  | 3.052778  |
| 1  | -0.290521 | 0.133831  | 2.853465  |
| 1  | -1.315244 | 1.346797  | 2.059167  |
| 6  | -2.5354   | -0.2714   | -0.350955 |
| 6  | -2.511219 | -0.857047 | -1.624697 |
| 6  | -3.521179 | 0.676767  | -0.038437 |
| 6  | -3.462348 | -0.489406 | -2.580299 |
| 1  | -1.76026  | -1.598354 | -1.876504 |
| 6  | -4.466818 | 1.04118   | -0.997601 |
| 1  | -3.560071 | 1.131172  | 0.946155  |
| 6  | -4.439081 | 0.46036   | -2.270127 |
| 1  | -3.437341 | -0.947462 | -3.564281 |
| 1  | -5.226244 | 1.7763    | -0.749406 |
| 1  | -5.177265 | 0.744703  | -3.013805 |

|   |           |           |           |
|---|-----------|-----------|-----------|
| 6 | 0.25899   | 0.986692  | -0.023865 |
| 6 | 1.271878  | 1.511544  | 0.805556  |
| 6 | -0.380945 | 1.932617  | -0.845573 |
| 6 | 1.603663  | 2.862715  | 0.8994    |
| 6 | -0.077073 | 3.298632  | -0.795528 |
| 1 | -1.155663 | 1.605749  | -1.533046 |
| 6 | 0.896037  | 3.762128  | 0.093638  |
| 1 | 2.388659  | 3.219356  | 1.55644   |
| 1 | -0.600655 | 3.997431  | -1.441514 |
| 1 | 1.127339  | 4.821704  | 0.149889  |
| 8 | 1.992486  | 0.497054  | 1.461299  |
| 6 | 3.140886  | 0.829145  | 2.264485  |
| 1 | 2.841702  | 1.47446   | 3.09409   |
| 1 | 3.51647   | -0.117252 | 2.650945  |
| 1 | 3.906997  | 1.317807  | 1.656328  |
| 5 | -0.026195 | -2.247972 | 0.458157  |
| 1 | 0.925288  | -2.028058 | 1.184472  |
| 1 | 0.226239  | -2.113227 | -0.728089 |
| 1 | -0.484219 | -3.32949  | 0.665483  |

**PC<sub>IVb-i</sub>**

E = -4217.998041    ZPVE = 0.289852    NIMAG = 0.

|    |              |              |              |
|----|--------------|--------------|--------------|
| 17 | -2.477381000 | -1.499586000 | 2.431688000  |
| 15 | -1.925317000 | -0.502476000 | 0.689744000  |
| 12 | 1.859925000  | 0.373992000  | -0.531104000 |
| 35 | 3.101719000  | -1.266324000 | -1.884099000 |
| 6  | -1.996474000 | 1.249293000  | 1.181995000  |
| 1  | -2.989394000 | 1.527562000  | 1.538899000  |

|   |              |              |              |
|---|--------------|--------------|--------------|
| 1 | -1.261169000 | 1.421961000  | 1.970547000  |
| 1 | -1.728553000 | 1.854086000  | 0.310837000  |
| 6 | -3.268476000 | -0.808792000 | -0.490326000 |
| 6 | -3.025413000 | -1.655252000 | -1.585250000 |
| 6 | -4.531433000 | -0.209894000 | -0.336890000 |
| 6 | -4.036483000 | -1.894177000 | -2.518702000 |
| 1 | -2.055640000 | -2.123777000 | -1.711695000 |
| 6 | -5.535597000 | -0.453866000 | -1.272932000 |
| 1 | -4.740618000 | 0.439227000  | 0.507068000  |
| 6 | -5.288790000 | -1.294497000 | -2.364239000 |
| 1 | -3.842249000 | -2.545744000 | -3.364689000 |
| 1 | -6.508730000 | 0.011169000  | -1.150855000 |
| 1 | -6.072657000 | -1.480185000 | -3.092177000 |
| 6 | 1.480145000  | 2.427759000  | -0.091488000 |
| 6 | 2.064557000  | 2.384672000  | 1.182277000  |
| 6 | 0.949344000  | 3.669644000  | -0.462294000 |
| 6 | 2.136816000  | 3.452275000  | 2.075370000  |
| 6 | 0.987307000  | 4.783822000  | 0.396949000  |
| 1 | 0.483441000  | 3.790566000  | -1.440041000 |
| 6 | 1.578529000  | 4.671800000  | 1.657282000  |
| 1 | 2.600058000  | 3.369964000  | 3.053379000  |
| 1 | 0.563102000  | 5.733910000  | 0.081352000  |
| 1 | 1.614354000  | 5.528916000  | 2.324200000  |
| 8 | 2.578895000  | 1.097814000  | 1.451865000  |
| 6 | 3.211100000  | 0.819210000  | 2.704709000  |
| 1 | 2.515200000  | 0.987872000  | 3.533185000  |
| 1 | 3.499823000  | -0.231313000 | 2.675593000  |
| 1 | 4.101106000  | 1.443867000  | 2.832911000  |
| 5 | -0.191477000 | -1.130095000 | 0.101918000  |
| 1 | 0.594399000  | -0.779329000 | 0.956754000  |

|   |              |              |              |
|---|--------------|--------------|--------------|
| 1 | -0.049164000 | -0.568619000 | -0.967893000 |
| 1 | -0.233307000 | -2.321990000 | -0.031732000 |

**Pivb-i**

E = -985.810215      ZPVE = 0.283964      NIMAG = 0.

|    |           |           |           |
|----|-----------|-----------|-----------|
| 15 | 0.199066  | -1.044043 | 0.17508   |
| 6  | -0.049095 | -1.99987  | -1.376419 |
| 1  | 0.755263  | -2.73667  | -1.447748 |
| 1  | -1.009928 | -2.51176  | -1.325318 |
| 1  | -0.029978 | -1.354327 | -2.257235 |
| 6  | 1.873806  | -0.314056 | -0.017791 |
| 6  | 2.790043  | -0.402945 | 1.041249  |
| 6  | 2.270704  | 0.308469  | -1.214418 |
| 6  | 4.079105  | 0.123273  | 0.907762  |
| 1  | 2.497166  | -0.884959 | 1.967671  |
| 6  | 3.558272  | 0.831171  | -1.346605 |
| 1  | 1.577931  | 0.395246  | -2.046126 |
| 6  | 4.465171  | 0.739426  | -0.284818 |
| 1  | 4.77863   | 0.047619  | 1.734941  |
| 1  | 3.85258   | 1.309417  | -2.27612  |
| 1  | 5.466845  | 1.14594   | -0.389105 |
| 6  | -0.953845 | 0.390348  | 0.134912  |
| 6  | -0.491091 | 1.691126  | 0.376702  |
| 6  | -2.344166 | 0.194441  | -0.046749 |
| 6  | -1.365741 | 2.780291  | 0.427584  |
| 6  | -3.223923 | 1.284185  | -0.002756 |
| 6  | -2.730414 | 2.570197  | 0.233755  |
| 1  | -0.980001 | 3.776938  | 0.615953  |

|   |           |           |           |
|---|-----------|-----------|-----------|
| 1 | -4.287134 | 1.138772  | -0.148077 |
| 1 | -3.423989 | 3.405245  | 0.26722   |
| 5 | 0.048006  | -2.154451 | 1.772995  |
| 1 | -1.079833 | -2.593352 | 1.762674  |
| 1 | 0.262993  | -1.432637 | 2.724104  |
| 1 | 0.891421  | -3.018396 | 1.634965  |
| 1 | 0.569366  | 1.859111  | 0.529375  |
| 8 | -2.749406 | -1.088268 | -0.26217  |
| 6 | -4.144987 | -1.367282 | -0.402605 |
| 1 | -4.562955 | -0.859816 | -1.278867 |
| 1 | -4.215372 | -2.446401 | -0.537619 |
| 1 | -4.69682  | -1.073567 | 0.496683  |

**R1v + b** S<sub>N</sub>2@P-b pathways in THF

**RC<sub>v</sub>b-i**

E = -4026.216104      ZPVE = 0.231745      NIMAG = 0.

|    |           |           |           |
|----|-----------|-----------|-----------|
| 17 | -4.767232 | -2.035648 | -0.292667 |
| 15 | -2.992613 | -1.015294 | 0.11729   |
| 12 | 2.319446  | -0.004104 | -0.45353  |
| 35 | 3.856207  | -1.883999 | -0.266684 |
| 6  | -2.256727 | -0.795235 | -1.537646 |
| 1  | -1.962662 | -1.76894  | -1.935852 |
| 1  | -2.960195 | -0.311667 | -2.219063 |
| 1  | -1.365866 | -0.167716 | -1.427666 |
| 6  | -3.578377 | 0.635994  | 0.626647  |
| 1  | -4.118957 | 0.554007  | 1.572091  |
| 1  | -2.697358 | 1.269829  | 0.771704  |
| 1  | -4.224392 | 1.077325  | -0.135254 |
| 6  | 1.08514   | 1.662139  | -0.902423 |

|   |           |           |           |
|---|-----------|-----------|-----------|
| 6 | 0.791909  | 1.945499  | 0.439019  |
| 6 | 0.494698  | 2.514656  | -1.842872 |
| 6 | -0.024104 | 2.985456  | 0.880379  |
| 6 | -0.335963 | 3.582657  | -1.456487 |
| 1 | 0.675028  | 2.359685  | -2.905888 |
| 6 | -0.592884 | 3.81175   | -0.103198 |
| 1 | -0.223674 | 3.169106  | 1.930969  |
| 1 | -0.779747 | 4.230031  | -2.208584 |
| 1 | -1.23341  | 4.635094  | 0.20059   |
| 8 | 1.435599  | 1.028701  | 1.296617  |
| 6 | 1.28979   | 1.141079  | 2.717079  |
| 1 | 0.241414  | 1.01573   | 3.004443  |
| 1 | 1.887346  | 0.339723  | 3.150369  |
| 1 | 1.661261  | 2.110756  | 3.063634  |
| 5 | -1.886756 | -1.93186  | 1.40231   |
| 1 | -2.525577 | -2.008176 | 2.426203  |
| 1 | -1.583404 | -2.994635 | 0.911609  |
| 1 | -0.950158 | -1.159791 | 1.485519  |

**TS<sub>vb-i</sub>**

E = -4026.192882      ZPVE = 0.234348      NIMAG = 1.

|    |              |              |              |
|----|--------------|--------------|--------------|
| 17 | -1.665987000 | -0.658878000 | 2.755794000  |
| 15 | -0.874791000 | 0.118358000  | 0.728180000  |
| 12 | 1.645884000  | 0.383504000  | -1.118046000 |
| 35 | 3.311195000  | 0.038784000  | -2.865978000 |
| 6  | -1.919539000 | -1.086236000 | -0.186406000 |
| 1  | -1.945447000 | -2.005081000 | 0.399157000  |
| 1  | -2.936252000 | -0.704890000 | -0.297874000 |



|   |              |              |              |
|---|--------------|--------------|--------------|
| 1 | -1.481764000 | -1.289446000 | -1.162564000 |
| 6 | -1.581229000 | 1.800191000  | 1.034162000  |
| 1 | -0.776844000 | 2.530542000  | 0.939401000  |
| 1 | -2.347506000 | 2.015344000  | 0.288717000  |
| 1 | -2.006223000 | 1.841609000  | 2.035544000  |
| 6 | -0.417647000 | 1.224701000  | -1.514150000 |
| 6 | 0.258225000  | 2.462352000  | -1.585158000 |
| 6 | -1.502796000 | 1.104805000  | -2.403049000 |
| 6 | -0.101310000 | 3.524637000  | -2.412642000 |
| 6 | -1.902387000 | 2.142151000  | -3.255198000 |
| 1 | -2.078408000 | 0.185445000  | -2.440440000 |
| 6 | -1.212859000 | 3.355901000  | -3.244898000 |
| 1 | 0.458910000  | 4.452329000  | -2.431230000 |
| 1 | -2.750362000 | 2.002851000  | -3.919254000 |
| 1 | -1.520584000 | 4.169352000  | -3.895038000 |
| 8 | 1.416133000  | 2.482519000  | -0.787846000 |
| 6 | 2.317301000  | 3.604151000  | -0.843540000 |
| 1 | 1.807035000  | 4.510738000  | -0.509617000 |
| 1 | 3.128624000  | 3.365929000  | -0.156821000 |
| 1 | 2.706159000  | 3.734521000  | -1.857020000 |
| 5 | 1.013308000  | -0.406296000 | 1.026694000  |
| 1 | 1.691330000  | 0.598972000  | 0.966696000  |
| 1 | 1.155970000  | -0.959468000 | 2.073824000  |
| 1 | 1.234705000  | -1.193198000 | 0.116508000  |

**PC<sub>v<sub>b</sub>-i</sub>**

E = -4026.257864      ZPVE = 0.236424      NIMAG = 0.

17      -5.564807      -1.690366      0.098108

|    |           |           |           |
|----|-----------|-----------|-----------|
| 15 | -1.793192 | 0.224095  | -0.235685 |
| 12 | 1.167181  | -1.701765 | -0.033643 |
| 35 | 3.530976  | -1.497801 | -0.543539 |
| 6  | -3.051626 | 0.810098  | -1.415748 |
| 1  | -3.862136 | 0.073877  | -1.384296 |
| 1  | -3.449685 | 1.784806  | -1.125495 |
| 1  | -2.636194 | 0.857484  | -2.424769 |
| 6  | -2.610757 | 0.177883  | 1.396299  |
| 1  | -1.919883 | -0.203187 | 2.150644  |
| 1  | -2.946342 | 1.1799    | 1.674774  |
| 1  | -3.476877 | -0.488163 | 1.306221  |
| 6  | -0.466081 | 1.490736  | -0.163084 |
| 6  | 0.720951  | 1.246329  | 0.548991  |
| 6  | -0.589172 | 2.723798  | -0.822246 |
| 6  | 1.744094  | 2.187384  | 0.620673  |
| 6  | 0.425406  | 3.680894  | -0.755674 |
| 1  | -1.487632 | 2.948961  | -1.385178 |
| 6  | 1.589364  | 3.410919  | -0.035531 |
| 1  | 2.654882  | 1.970947  | 1.165783  |
| 1  | 0.304213  | 4.630151  | -1.266662 |
| 1  | 2.384884  | 4.147075  | 0.017909  |
| 8  | 0.842441  | -0.00103  | 1.186022  |
| 6  | 1.438811  | 0.007687  | 2.521319  |
| 1  | 1.0111    | 0.832578  | 3.092051  |
| 1  | 1.167654  | -0.944534 | 2.978081  |
| 1  | 2.523253  | 0.098913  | 2.44991   |
| 5  | -1.090834 | -1.508316 | -0.808351 |
| 1  | -0.787977 | -2.151173 | 0.192138  |
| 1  | -1.919111 | -2.119178 | -1.41729  |
| 1  | -0.142191 | -1.263982 | -1.545232 |

**P<sub>Vb-i</sub>**

E = -794.068414      ZPVE = 0.230450      NIMAG = 0.

|    |           |           |           |
|----|-----------|-----------|-----------|
| 15 | 1.637988  | -0.00221  | -0.065753 |
| 6  | 2.633168  | -1.51599  | 0.22941   |
| 1  | 3.678576  | -1.205141 | 0.306836  |
| 1  | 2.342817  | -2.025847 | 1.151519  |
| 1  | 2.546268  | -2.201046 | -0.617015 |
| 6  | 1.933716  | 0.999324  | 1.446626  |
| 1  | 1.350369  | 1.919011  | 1.394924  |
| 1  | 1.657294  | 0.439569  | 2.344095  |
| 1  | 2.997549  | 1.249805  | 1.48777   |
| 6  | -0.113852 | -0.549113 | -0.004739 |
| 6  | -1.158049 | 0.406741  | 0.010551  |
| 6  | -0.457272 | -1.907679 | -0.032301 |
| 6  | -2.497065 | -0.004682 | 0.001325  |
| 6  | -1.792099 | -2.324143 | -0.043577 |
| 1  | 0.322114  | -2.661167 | -0.049743 |
| 6  | -2.806279 | -1.367617 | -0.026248 |
| 1  | -3.297464 | 0.724667  | 0.015329  |
| 1  | -2.02973  | -3.382702 | -0.066355 |
| 1  | -3.848202 | -1.673749 | -0.034768 |
| 8  | -0.772126 | 1.712745  | 0.041421  |
| 6  | -1.767659 | 2.737988  | -0.013883 |
| 1  | -2.42633  | 2.696498  | 0.860491  |
| 1  | -1.218727 | 3.679387  | -0.013122 |
| 1  | -2.360921 | 2.659832  | -0.931156 |
| 5  | 2.211718  | 0.857659  | -1.719554 |

|   |          |          |           |
|---|----------|----------|-----------|
| 1 | 1.573469 | 1.874562 | -1.8695   |
| 1 | 3.397473 | 1.064239 | -1.536069 |
| 1 | 2.016394 | 0.036004 | -2.593521 |

**R1 + b** SN2@P-f pathways in THF

**RC<sub>1b-r</sub>**

E = -4570.593992    ZPVE = 0.522060    NIMAG = 0.

|   |           |           |           |
|---|-----------|-----------|-----------|
| 6 | -2.730996 | -0.561886 | -1.218264 |
| 6 | -2.715665 | -2.661891 | 0.25734   |
| 6 | -1.520147 | -2.711209 | -2.009208 |
| 6 | -2.333107 | -1.469547 | -2.406677 |
| 6 | -2.294747 | -3.511972 | -0.952061 |
| 6 | -4.080044 | -0.577908 | 1.046318  |
| 6 | -1.179626 | -3.562306 | -3.23862  |
| 6 | -5.142035 | 0.432646  | 0.575177  |
| 6 | -4.695832 | -1.471387 | 2.138789  |
| 1 | -3.398128 | 0.213602  | -1.608619 |
| 1 | -3.33728  | -3.279117 | 0.91136   |
| 1 | -1.833611 | -2.384895 | 0.844301  |
| 1 | -0.572627 | -2.38056  | -1.560146 |
| 1 | -1.809826 | -0.893943 | -3.174325 |
| 1 | -3.277484 | -1.799219 | -2.862839 |
| 1 | -1.69118  | -4.361626 | -0.60976  |
| 1 | -3.193525 | -3.936531 | -1.424655 |
| 1 | -3.260056 | -0.020612 | 1.519448  |
| 1 | -0.592198 | -2.9922   | -3.967187 |
| 1 | -0.597326 | -4.445799 | -2.954585 |
| 1 | -2.092167 | -3.909306 | -3.739531 |

|    |           |           |           |
|----|-----------|-----------|-----------|
| 1  | -5.999509 | -0.092969 | 0.136411  |
| 1  | -5.510723 | 1.022574  | 1.420827  |
| 1  | -4.764026 | 1.137643  | -0.169159 |
| 1  | -5.465637 | -2.132687 | 1.721132  |
| 1  | -5.173576 | -0.848312 | 2.902307  |
| 1  | -3.950231 | -2.092244 | 2.641944  |
| 6  | -1.941038 | 2.079827  | -0.029217 |
| 6  | -1.668158 | 2.562411  | 1.260935  |
| 6  | -2.676565 | 2.873443  | -0.926864 |
| 6  | -2.148229 | 3.814336  | 1.654418  |
| 1  | -1.083031 | 1.972052  | 1.957044  |
| 6  | -3.143005 | 4.126331  | -0.531431 |
| 1  | -2.87715  | 2.527979  | -1.936654 |
| 6  | -2.885671 | 4.595304  | 0.761928  |
| 1  | -1.939113 | 4.176935  | 2.655979  |
| 1  | -3.70708  | 4.734877  | -1.231243 |
| 1  | -3.254004 | 5.56966   | 1.068173  |
| 17 | -0.130468 | 0.908955  | -2.18577  |
| 6  | -3.510568 | -1.401007 | -0.146158 |
| 1  | -4.389316 | -1.758136 | -0.708083 |
| 15 | -1.295954 | 0.445854  | -0.519862 |
| 5  | -0.116266 | -0.297278 | 0.834963  |
| 1  | 0.685514  | 0.595952  | 1.033842  |
| 1  | -0.767298 | -0.529604 | 1.816443  |
| 1  | 0.37082   | -1.302215 | 0.364183  |
| 6  | 4.405198  | -0.893167 | -1.891788 |
| 6  | 5.283949  | -0.12389  | -2.677029 |
| 6  | 5.550928  | 1.201711  | -2.328005 |
| 6  | 4.942224  | 1.77676   | -1.199901 |
| 6  | 4.078506  | 0.96685   | -0.464739 |

|    |          |           |           |
|----|----------|-----------|-----------|
| 6  | 3.76967  | -0.368242 | -0.759803 |
| 1  | 4.220069 | -1.925319 | -2.188156 |
| 1  | 5.761088 | -0.559387 | -3.551658 |
| 1  | 6.231765 | 1.799958  | -2.927471 |
| 1  | 5.15353  | 2.806484  | -0.930247 |
| 12 | 2.451583 | -0.632291 | 0.897739  |
| 35 | 2.445568 | -1.870476 | 3.046413  |
| 8  | 3.390842 | 1.396826  | 0.691655  |
| 6  | 3.548567 | 2.735895  | 1.168291  |
| 1  | 4.588151 | 2.92219   | 1.457524  |
| 1  | 3.240301 | 3.455762  | 0.402814  |
| 1  | 2.901177 | 2.82828   | 2.040643  |

**TS<sub>lb-r</sub>**

E = -4570.516666    ZPVE = 0.522858    NIMAG = 1.

|   |           |           |           |
|---|-----------|-----------|-----------|
| 6 | 1.983781  | -1.033407 | 0.958998  |
| 6 | 2.058354  | -3.130029 | -0.570793 |
| 6 | 0.475632  | -3.104356 | 1.442586  |
| 6 | 1.279762  | -1.925579 | 2.014503  |
| 6 | 1.363671  | -3.954215 | 0.523107  |
| 6 | 3.739078  | -1.158356 | -1.007743 |
| 6 | -0.136122 | -3.947049 | 2.569739  |
| 6 | 4.935186  | -0.508215 | -0.287404 |
| 6 | 4.268887  | -2.025597 | -2.163489 |
| 1 | 2.661191  | -0.3771   | 1.50933   |
| 1 | 2.753684  | -3.785644 | -1.103173 |
| 1 | 1.327328  | -2.793487 | -1.310256 |
| 1 | -0.348632 | -2.703794 | 0.836342  |

|    |           |           |           |
|----|-----------|-----------|-----------|
| 1  | 0.656013  | -1.312594 | 2.668943  |
| 1  | 2.077843  | -2.335431 | 2.651012  |
| 1  | 0.768713  | -4.75325  | 0.062399  |
| 1  | 2.127989  | -4.450738 | 1.140478  |
| 1  | 3.141763  | -0.36179  | -1.464482 |
| 1  | -0.794055 | -3.348894 | 3.210629  |
| 1  | -0.725148 | -4.777602 | 2.164328  |
| 1  | 0.649292  | -4.373447 | 3.206235  |
| 1  | 5.622821  | -1.282228 | 0.076833  |
| 1  | 5.494187  | 0.143624  | -0.96733  |
| 1  | 4.634137  | 0.096601  | 0.572014  |
| 1  | 4.850514  | -2.879058 | -1.793129 |
| 1  | 4.931965  | -1.427053 | -2.7981   |
| 1  | 3.465145  | -2.410833 | -2.797323 |
| 6  | 1.743467  | 1.692009  | -0.450598 |
| 6  | 1.392609  | 2.246834  | -1.69493  |
| 6  | 2.829349  | 2.251965  | 0.249629  |
| 6  | 2.117984  | 3.313485  | -2.23214  |
| 1  | 0.551493  | 1.856412  | -2.25197  |
| 6  | 3.560779  | 3.305366  | -0.294765 |
| 1  | 3.096269  | 1.87741   | 1.22937   |
| 6  | 3.206608  | 3.843105  | -1.537457 |
| 1  | 1.827277  | 3.725742  | -3.193677 |
| 1  | 4.401595  | 3.713807  | 0.2578    |
| 1  | 3.771298  | 4.671724  | -1.954427 |
| 17 | 0.73942   | 1.33024   | 2.404589  |
| 6  | 2.847894  | -1.937415 | 0.008976  |
| 1  | 3.554425  | -2.39034  | 0.726402  |
| 15 | 0.790491  | 0.236039  | 0.161237  |
| 5  | -0.003792 | -0.547346 | -1.488232 |

|    |           |           |           |
|----|-----------|-----------|-----------|
| 1  | -0.743829 | 0.293492  | -1.97244  |
| 1  | 0.87396   | -0.801332 | -2.272032 |
| 1  | -0.589748 | -1.550111 | -1.118453 |
| 6  | -2.17857  | -0.333226 | 1.998505  |
| 6  | -2.96189  | 0.161119  | 3.044886  |
| 6  | -3.344239 | 1.505926  | 3.028065  |
| 6  | -2.960899 | 2.349731  | 1.981032  |
| 6  | -2.176218 | 1.831528  | 0.940953  |
| 6  | -1.776826 | 0.470937  | 0.912064  |
| 1  | -1.880653 | -1.378702 | 2.029049  |
| 1  | -3.270518 | -0.488983 | 3.858315  |
| 1  | -3.944904 | 1.910383  | 3.838033  |
| 1  | -3.269184 | 3.388757  | 1.993955  |
| 12 | -2.350441 | -0.434545 | -0.995823 |
| 35 | -4.116325 | -1.335679 | -2.419835 |
| 8  | -1.762484 | 2.580107  | -0.126547 |
| 6  | -2.119784 | 3.963023  | -0.192109 |
| 1  | -3.207605 | 4.089858  | -0.230101 |
| 1  | -1.711872 | 4.515578  | 0.660986  |
| 1  | -1.675726 | 4.338056  | -1.114193 |

**PC<sub>1b-r</sub>**

E = -4570.602641    ZPVE = 0.525318    NIMAG = 0.

|   |           |          |          |
|---|-----------|----------|----------|
| 6 | -1.493174 | 1.2117   | 0.624281 |
| 6 | -1.158725 | 3.520252 | -0.44859 |
| 6 | 0.184402  | 2.941684 | 1.642472 |
| 6 | -0.779642 | 1.766022 | 1.882997 |
| 6 | -0.514142 | 4.048039 | 0.840953 |



|   |           |           |           |
|---|-----------|-----------|-----------|
| 6 | -3.058693 | 1.959538  | -1.366403 |
| 6 | 0.753403  | 3.461896  | 2.968453  |
| 6 | -4.374634 | 1.335545  | -0.865481 |
| 6 | -3.393166 | 3.112179  | -2.330455 |
| 1 | -2.269797 | 0.534803  | 0.999827  |
| 1 | -1.675284 | 4.34859   | -0.940543 |
| 1 | -0.383603 | 3.182708  | -1.14674  |
| 1 | 1.031992  | 2.595796  | 1.033674  |
| 1 | -0.282396 | 0.960975  | 2.431857  |
| 1 | -1.584476 | 2.114141  | 2.544288  |
| 1 | 0.203428  | 4.84376   | 0.603876  |
| 1 | -1.292379 | 4.50504   | 1.470131  |
| 1 | -2.52294  | 1.206121  | -1.956309 |
| 1 | 1.289513  | 2.674478  | 3.510219  |
| 1 | 1.450047  | 4.290662  | 2.798831  |
| 1 | -0.050178 | 3.827178  | 3.619322  |
| 1 | -5.000586 | 2.10731   | -0.400144 |
| 1 | -4.94122  | 0.900282  | -1.695672 |
| 1 | -4.21799  | 0.550047  | -0.122752 |
| 1 | -3.881816 | 3.943378  | -1.806908 |
| 1 | -4.086536 | 2.756386  | -3.100575 |
| 1 | -2.508344 | 3.504212  | -2.840237 |
| 6 | -1.52838  | -1.136108 | -1.275364 |
| 6 | -1.259456 | -1.473689 | -2.612373 |
| 6 | -2.666061 | -1.6695   | -0.646353 |
| 6 | -2.115644 | -2.330981 | -3.309569 |
| 1 | -0.398376 | -1.063791 | -3.126202 |
| 6 | -3.515707 | -2.524226 | -1.348549 |
| 1 | -2.889143 | -1.446065 | 0.39361   |
| 6 | -3.244416 | -2.858782 | -2.679337 |

|    |           |           |           |
|----|-----------|-----------|-----------|
| 1  | -1.898083 | -2.579781 | -4.34389  |
| 1  | -4.391513 | -2.928532 | -0.849993 |
| 1  | -3.911216 | -3.522898 | -3.221421 |
| 17 | -3.548417 | -1.003227 | 2.973567  |
| 6  | -2.168451 | 2.389365  | -0.160802 |
| 1  | -2.866776 | 2.804365  | 0.584162  |
| 15 | -0.416871 | 0.035528  | -0.402669 |
| 5  | 0.817213  | 0.808878  | -1.725254 |
| 1  | 1.36871   | -0.185528 | -2.202618 |
| 1  | 0.270453  | 1.386497  | -2.618558 |
| 1  | 1.589615  | 1.556742  | -1.14878  |
| 6  | 1.897847  | -0.178078 | 1.131669  |
| 6  | 2.895427  | -0.756547 | 1.921849  |
| 6  | 2.7381    | -2.07981  | 2.338299  |
| 6  | 1.590603  | -2.788527 | 1.996286  |
| 6  | 0.575385  | -2.202587 | 1.213096  |
| 6  | 0.731981  | -0.87699  | 0.73771   |
| 1  | 1.973928  | 0.883187  | 0.910697  |
| 1  | 3.763805  | -0.17576  | 2.211835  |
| 1  | 3.499188  | -2.557728 | 2.946344  |
| 1  | 1.476355  | -3.80648  | 2.346535  |
| 12 | 3.045519  | 0.004137  | -1.176219 |
| 35 | 5.442726  | 0.207106  | -1.151288 |
| 8  | -0.557249 | -2.850824 | 0.887797  |
| 6  | -0.80924  | -4.163617 | 1.406492  |
| 1  | -0.067248 | -4.879003 | 1.037327  |
| 1  | -0.819635 | -4.154355 | 2.500183  |
| 1  | -1.796745 | -4.431617 | 1.033945  |

**P<sub>lb-r</sub>**

E = -1338.430919      ZPVE = 0.519871      NIMAG = 0.

|   |          |           |           |
|---|----------|-----------|-----------|
| 6 | 1.315111 | 0.721434  | -0.564539 |
| 6 | 3.338924 | -0.121597 | 0.74685   |
| 6 | 2.707847 | 2.351318  | 0.945784  |
| 6 | 1.803756 | 2.175668  | -0.291003 |
| 6 | 3.840066 | 1.3137    | 0.971882  |
| 6 | 2.363607 | -1.656463 | -1.142063 |
| 6 | 3.252287 | 3.784771  | 1.010809  |
| 6 | 1.769511 | -1.630074 | -2.56277  |
| 6 | 3.689482 | -2.441973 | -1.182399 |
| 1 | 0.899469 | 0.699709  | -1.575143 |
| 1 | 4.201087 | -0.79344  | 0.733746  |
| 1 | 2.705256 | -0.438142 | 1.584731  |
| 1 | 2.091584 | 2.187024  | 1.834293  |
| 1 | 0.957261 | 2.866149  | -0.206514 |
| 1 | 2.364382 | 2.487904  | -1.18502  |
| 1 | 4.374622 | 1.38256   | 1.92814   |
| 1 | 4.573464 | 1.554952  | 0.186622  |
| 1 | 1.678302 | -2.20931  | -0.49315  |
| 1 | 2.439231 | 4.519601  | 1.041332  |
| 1 | 3.867414 | 3.930268  | 1.90632   |
| 1 | 3.876457 | 4.010853  | 0.136396  |
| 1 | 2.430669 | -1.082164 | -3.247195 |
| 1 | 1.660994 | -2.648643 | -2.95044  |
| 1 | 0.782326 | -1.163348 | -2.606364 |
| 1 | 4.4628   | -1.886969 | -1.729807 |
| 1 | 3.542365 | -3.398125 | -1.696395 |
| 1 | 4.077457 | -2.666492 | -0.185352 |

|    |           |           |           |
|----|-----------|-----------|-----------|
| 6  | -0.574884 | -1.472026 | 0.41005   |
| 6  | -0.232134 | -2.302846 | 1.488065  |
| 6  | -1.21876  | -2.030004 | -0.704567 |
| 6  | -0.504715 | -3.672774 | 1.439444  |
| 1  | 0.243401  | -1.880253 | 2.366911  |
| 6  | -1.49424  | -3.398153 | -0.750578 |
| 1  | -1.515705 | -1.398757 | -1.536507 |
| 6  | -1.133171 | -4.224046 | 0.319193  |
| 1  | -0.231831 | -4.30535  | 2.279109  |
| 1  | -1.993418 | -3.817421 | -1.619414 |
| 1  | -1.348189 | -5.288037 | 0.282642  |
| 6  | 2.565915  | -0.219083 | -0.583002 |
| 1  | 3.212255  | 0.270207  | -1.333233 |
| 15 | -0.196071 | 0.32656   | 0.524311  |
| 5  | -0.105524 | 0.910811  | 2.405443  |
| 1  | -1.111713 | 0.488588  | 2.921413  |
| 1  | 0.901088  | 0.428056  | 2.876487  |
| 1  | -0.068959 | 2.12164   | 2.370848  |
| 6  | -1.40677  | 1.983036  | -1.483294 |
| 6  | -2.474451 | 2.624877  | -2.1181   |
| 6  | -3.770585 | 2.422915  | -1.648645 |
| 6  | -4.000211 | 1.582709  | -0.557339 |
| 6  | -2.926728 | 0.940838  | 0.07657   |
| 6  | -1.596652 | 1.136244  | -0.381411 |
| 1  | -0.411341 | 2.163263  | -1.868047 |
| 1  | -2.285735 | 3.274575  | -2.966535 |
| 1  | -4.612256 | 2.914692  | -2.127404 |
| 1  | -5.012944 | 1.430235  | -0.20562  |
| 8  | -3.086187 | 0.099733  | 1.129667  |
| 6  | -4.390109 | -0.112419 | 1.673303  |

|   |           |           |          |
|---|-----------|-----------|----------|
| 1 | -4.825862 | 0.826544  | 2.031709 |
| 1 | -5.055911 | -0.574413 | 0.935889 |
| 1 | -4.248425 | -0.792601 | 2.512907 |

**R1<sub>II</sub> + b S<sub>N</sub>2@P-f pathways in THF**

**RC<sub>IIb-r</sub>**

E = -4262.105329    ZPVE = 0.403173    NIMAG = 0.

|    |           |           |           |
|----|-----------|-----------|-----------|
| 17 | 1.711737  | -1.923555 | -1.061412 |
| 15 | 2.27756   | -0.196397 | -0.048176 |
| 12 | -1.712468 | 0.873262  | -0.501406 |
| 35 | -2.231699 | 3.275237  | -0.135557 |
| 5  | 0.797191  | 1.070177  | -0.055199 |
| 1  | 0.337872  | 1.045203  | -1.179019 |
| 1  | 0.019169  | 0.707466  | 0.803012  |
| 1  | 1.25624   | 2.15136   | 0.201171  |
| 6  | -2.692688 | -0.957915 | -1.035587 |
| 6  | -3.189722 | -1.186951 | 0.255801  |
| 6  | -3.041026 | -1.925131 | -1.987481 |
| 6  | -3.995762 | -2.259089 | 0.634465  |
| 6  | -3.848795 | -3.03162  | -1.665345 |
| 1  | -2.693009 | -1.824352 | -3.015232 |
| 6  | -4.324628 | -3.192557 | -0.361901 |
| 1  | -4.361075 | -2.387815 | 1.648483  |
| 1  | -4.108284 | -3.760758 | -2.429139 |
| 1  | -4.952551 | -4.042481 | -0.108656 |
| 8  | -2.751797 | -0.183189 | 1.148619  |
| 6  | -3.364349 | -0.037415 | 2.433152  |
| 1  | -3.146451 | -0.902813 | 3.067122  |
| 1  | -2.932692 | 0.859914  | 2.876406  |

|   |           |           |           |
|---|-----------|-----------|-----------|
| 1 | -4.447525 | 0.085747  | 2.32879   |
| 6 | 3.743538  | 0.446643  | -1.071677 |
| 6 | 4.761412  | -0.64979  | -1.439665 |
| 1 | 5.254651  | -1.082064 | -0.568087 |
| 1 | 4.303927  | -1.456201 | -2.017411 |
| 1 | 5.536048  | -0.191799 | -2.064558 |
| 6 | 4.441392  | 1.575989  | -0.280607 |
| 1 | 3.744214  | 2.354547  | 0.040903  |
| 1 | 4.982066  | 1.200495  | 0.591606  |
| 1 | 5.176816  | 2.045643  | -0.943167 |
| 6 | 3.140968  | 1.032     | -2.370038 |
| 1 | 3.965344  | 1.401533  | -2.989723 |
| 1 | 2.601236  | 0.277257  | -2.949417 |
| 1 | 2.46699   | 1.868103  | -2.171457 |
| 6 | 2.682208  | -0.794688 | 1.707349  |
| 6 | 2.766486  | 0.456473  | 2.614456  |
| 1 | 3.580674  | 1.129008  | 2.337658  |
| 1 | 1.832546  | 1.023996  | 2.616471  |
| 1 | 2.95417   | 0.115453  | 3.638511  |
| 6 | 3.988606  | -1.603999 | 1.784355  |
| 1 | 3.987531  | -2.455271 | 1.097585  |
| 1 | 4.870472  | -0.990263 | 1.586871  |
| 1 | 4.087603  | -1.99991  | 2.801274  |
| 6 | 1.506355  | -1.676526 | 2.187154  |
| 1 | 1.462615  | -2.627603 | 1.652258  |
| 1 | 1.661887  | -1.892962 | 3.249583  |
| 1 | 0.540134  | -1.175379 | 2.086613  |

**TSlib-r**

E = -4262.017403    ZPVE = 0.401733    NIMAG = 1.

|    |           |           |           |
|----|-----------|-----------|-----------|
| 17 | 0.297728  | -1.316318 | 1.889687  |
| 15 | 1.689472  | -0.230405 | -0.353212 |
| 12 | -1.320566 | -0.750635 | 0.115464  |
| 35 | -3.053444 | -2.494243 | -0.133021 |
| 5  | 0.590232  | -1.037077 | -1.744726 |
| 1  | -0.158155 | -1.844605 | -1.230439 |
| 1  | 0.029577  | -0.143008 | -2.31556  |
| 1  | 1.395003  | -1.64622  | -2.416488 |
| 6  | -0.853074 | 1.34856   | 0.674268  |
| 6  | -1.904189 | 1.826892  | -0.120592 |
| 6  | -0.458767 | 2.130936  | 1.761486  |
| 6  | -2.560227 | 3.034822  | 0.120573  |
| 6  | -1.086869 | 3.356838  | 2.033545  |
| 1  | 0.339157  | 1.787177  | 2.415383  |
| 6  | -2.11918  | 3.80764   | 1.204874  |
| 1  | -3.388222 | 3.375012  | -0.492637 |
| 1  | -0.774035 | 3.954085  | 2.885601  |
| 1  | -2.603733 | 4.758273  | 1.408202  |
| 8  | -2.27077  | 0.905759  | -1.102216 |
| 6  | -3.43043  | 1.14101   | -1.913897 |
| 1  | -3.291114 | 2.040024  | -2.521374 |
| 1  | -3.525496 | 0.267805  | -2.557619 |
| 1  | -4.322893 | 1.241965  | -1.288533 |
| 6  | 3.106091  | -1.400583 | 0.284321  |
| 6  | 3.588707  | -1.063597 | 1.707835  |
| 1  | 3.982146  | -0.048523 | 1.78973   |
| 1  | 2.795812  | -1.192213 | 2.443986  |
| 1  | 4.401515  | -1.754543 | 1.959006  |

|   |          |           |           |
|---|----------|-----------|-----------|
| 6 | 4.315168 | -1.306356 | -0.685328 |
| 1 | 4.045273 | -1.528495 | -1.720342 |
| 1 | 4.840033 | -0.352426 | -0.635837 |
| 1 | 5.022391 | -2.078709 | -0.363298 |
| 6 | 2.599537 | -2.8574   | 0.210043  |
| 1 | 3.421876 | -3.504559 | 0.535983  |
| 1 | 1.748165 | -3.041713 | 0.861833  |
| 1 | 2.333675 | -3.142485 | -0.810652 |
| 6 | 2.378737 | 1.497251  | -0.88587  |
| 6 | 3.065838 | 1.22892   | -2.264724 |
| 1 | 3.900002 | 0.53564   | -2.231922 |
| 1 | 2.346174 | 0.884786  | -3.010455 |
| 1 | 3.45917  | 2.196321  | -2.597836 |
| 6 | 3.367855 | 2.092567  | 0.129218  |
| 1 | 2.901923 | 2.237737  | 1.107594  |
| 1 | 4.269148 | 1.491364  | 0.255881  |
| 1 | 3.682177 | 3.076521  | -0.236814 |
| 6 | 1.266142 | 2.518598  | -1.169376 |
| 1 | 0.841353 | 2.926717  | -0.25579  |
| 1 | 1.721572 | 3.343452  | -1.72899  |
| 1 | 0.464377 | 2.102929  | -1.78183  |

**PC<sub>11b-r</sub>**

E = -4262.171132      ZPVE = 0.406946      NIMAG = 0.

|    |           |           |           |
|----|-----------|-----------|-----------|
| 17 | -2.170921 | 1.440147  | 2.495007  |
| 15 | 1.454708  | -0.663819 | 0.078139  |
| 12 | -2.255723 | -0.019179 | 0.683495  |
| 35 | -4.18496  | -1.165101 | -0.327961 |



|   |           |           |           |
|---|-----------|-----------|-----------|
| 5 | -0.227094 | -1.621608 | 0.438987  |
| 1 | -0.734496 | -1.032078 | 1.381395  |
| 1 | -0.903509 | -1.658656 | -0.555295 |
| 1 | 0.063963  | -2.720663 | 0.831157  |
| 6 | 1.214492  | 1.128927  | -0.36128  |
| 6 | -0.024617 | 1.707805  | -0.714714 |
| 6 | 2.324716  | 1.999414  | -0.360544 |
| 6 | -0.155875 | 3.077521  | -0.949744 |
| 6 | 2.210969  | 3.361919  | -0.630612 |
| 1 | 3.309416  | 1.608784  | -0.153767 |
| 6 | 0.958492  | 3.910907  | -0.904406 |
| 1 | -1.136156 | 3.484064  | -1.171971 |
| 1 | 3.097995  | 3.98673   | -0.617516 |
| 1 | 0.846015  | 4.974445  | -1.088319 |
| 8 | -1.173645 | 0.919149  | -0.869769 |
| 6 | -1.762183 | 0.948115  | -2.208854 |
| 1 | -0.990756 | 0.712565  | -2.942834 |
| 1 | -2.542235 | 0.188484  | -2.206573 |
| 1 | -2.197835 | 1.92823   | -2.40744  |
| 6 | 2.489868  | -0.750163 | 1.704152  |
| 6 | 3.773786  | 0.105079  | 1.766149  |
| 1 | 4.446854  | -0.049121 | 0.920375  |
| 1 | 3.555132  | 1.17002   | 1.861295  |
| 1 | 4.318862  | -0.188814 | 2.670503  |
| 6 | 2.882504  | -2.225698 | 1.948451  |
| 1 | 2.038451  | -2.910587 | 1.845204  |
| 1 | 3.687526  | -2.55193  | 1.284818  |
| 1 | 3.254138  | -2.308989 | 2.976022  |
| 6 | 1.558585  | -0.28197  | 2.846418  |
| 1 | 2.148825  | -0.235479 | 3.76868   |

|   |          |           |           |
|---|----------|-----------|-----------|
| 1 | 1.144659 | 0.714677  | 2.666445  |
| 1 | 0.731224 | -0.97283  | 3.01474   |
| 6 | 2.313259 | -1.458838 | -1.439587 |
| 6 | 2.217614 | -2.998174 | -1.341429 |
| 1 | 2.799444 | -3.404327 | -0.512521 |
| 1 | 1.186201 | -3.341358 | -1.236389 |
| 1 | 2.622883 | -3.422801 | -2.267029 |
| 6 | 3.788444 | -1.046064 | -1.596935 |
| 1 | 3.914528 | 0.036412  | -1.683971 |
| 1 | 4.411139 | -1.41041  | -0.776421 |
| 1 | 4.175016 | -1.491827 | -2.520862 |
| 6 | 1.524582 | -1.004038 | -2.687472 |
| 1 | 1.605442 | 0.072984  | -2.856841 |
| 1 | 1.9439   | -1.510722 | -3.563891 |
| 1 | 0.467514 | -1.276938 | -2.623838 |

**R1<sub>III</sub> + b** S<sub>N</sub>2@P-f pathways in THF

**RC<sub>IIIb-r</sub>**

E = -4409.699316      ZPVE = 0.340209      NIMAG = 0.

|    |           |           |           |
|----|-----------|-----------|-----------|
| 17 | -1.221776 | 0.171112  | -2.172316 |
| 15 | -1.721012 | 0.159033  | -0.147701 |
| 12 | 2.234984  | -1.006601 | -0.071908 |
| 35 | 2.311174  | -3.481343 | 0.074994  |
| 5  | -0.173449 | -0.33903  | 0.899227  |
| 1  | 0.129448  | -1.450711 | 0.527303  |
| 1  | 0.660217  | 0.506859  | 0.674108  |
| 1  | -0.531379 | -0.351472 | 2.050351  |
| 6  | 3.310733  | 0.645316  | -0.890358 |
| 6  | 3.798018  | 1.090931  | 0.346501  |

|   |           |           |           |
|---|-----------|-----------|-----------|
| 6 | 3.694982  | 1.414545  | -1.995798 |
| 6 | 4.606542  | 2.209489  | 0.540222  |
| 6 | 4.505928  | 2.557225  | -1.863743 |
| 1 | 3.360911  | 1.133866  | -2.994299 |
| 6 | 4.955313  | 2.950217  | -0.601274 |
| 1 | 4.961707  | 2.514861  | 1.519177  |
| 1 | 4.78479   | 3.135399  | -2.741339 |
| 1 | 5.583123  | 3.830437  | -0.492362 |
| 8 | 3.364655  | 0.245825  | 1.391236  |
| 6 | 3.705256  | 0.544549  | 2.747768  |
| 1 | 3.313114  | 1.525737  | 3.035379  |
| 1 | 3.242208  | -0.230156 | 3.358897  |
| 1 | 4.791279  | 0.522579  | 2.885092  |
| 6 | -2.341737 | 1.8374    | 0.178636  |
| 6 | -3.011668 | 2.601439  | -0.790583 |
| 6 | -2.153359 | 2.355425  | 1.471617  |
| 6 | -3.495346 | 3.869074  | -0.463495 |
| 1 | -3.145577 | 2.220032  | -1.797246 |
| 6 | -2.64684  | 3.622146  | 1.79118   |
| 1 | -1.621742 | 1.780837  | 2.222335  |
| 6 | -3.316663 | 4.379128  | 0.826382  |
| 1 | -4.007729 | 4.457695  | -1.217969 |
| 1 | -2.499569 | 4.016575  | 2.791605  |
| 1 | -3.69291  | 5.366473  | 1.075969  |
| 6 | -3.111196 | -1.00642  | -0.028305 |
| 6 | -4.446717 | -0.572677 | -0.063541 |
| 6 | -2.823408 | -2.376308 | 0.110091  |
| 6 | -5.482703 | -1.503035 | 0.034805  |
| 1 | -4.681877 | 0.481613  | -0.158107 |
| 6 | -3.865239 | -3.299462 | 0.202522  |

|   |           |           |          |
|---|-----------|-----------|----------|
| 1 | -1.796102 | -2.72371  | 0.142962 |
| 6 | -5.193917 | -2.864523 | 0.16599  |
| 1 | -6.513172 | -1.162629 | 0.011469 |
| 1 | -3.637856 | -4.355396 | 0.308965 |
| 1 | -6.002284 | -3.585271 | 0.242971 |

**TS<sub>mb-r</sub>**

E = -4409.640469    ZPVE = 0.340324    NIMAG = 1.

|    |           |           |           |
|----|-----------|-----------|-----------|
| 17 | 0.533293  | -2.160746 | 1.458962  |
| 15 | 1.003753  | -0.646741 | -0.140948 |
| 12 | -1.955309 | -0.986194 | -0.794685 |
| 35 | -4.207669 | -1.752818 | -0.284611 |
| 5  | 0.165683  | -1.469733 | -1.734875 |
| 1  | -0.552383 | -2.345642 | -1.267501 |
| 1  | -0.464239 | -0.622566 | -2.330859 |
| 1  | 0.974592  | -1.993424 | -2.441839 |
| 6  | -0.952063 | 0.400102  | 0.823282  |
| 6  | -1.755479 | 1.366945  | 0.181478  |
| 6  | -0.81631  | 0.568191  | 2.211179  |
| 6  | -2.364905 | 2.438346  | 0.831158  |
| 6  | -1.412161 | 1.628969  | 2.902619  |
| 1  | -0.21644  | -0.137812 | 2.774914  |
| 6  | -2.171221 | 2.57274   | 2.209727  |
| 1  | -2.993783 | 3.142596  | 0.299114  |
| 1  | -1.275726 | 1.719032  | 3.976241  |
| 1  | -2.631696 | 3.404246  | 2.734537  |
| 8  | -1.990651 | 1.080174  | -1.174104 |
| 6  | -2.86737  | 1.914242  | -1.955988 |

|   |           |           |           |
|---|-----------|-----------|-----------|
| 1 | -2.47404  | 2.932536  | -1.994608 |
| 1 | -2.870747 | 1.481543  | -2.955813 |
| 1 | -3.878038 | 1.907744  | -1.539454 |
| 6 | 1.466837  | 1.152787  | -0.309335 |
| 6 | 2.160888  | 1.818168  | 0.712986  |
| 6 | 1.181537  | 1.832951  | -1.502519 |
| 6 | 2.550097  | 3.148153  | 0.550792  |
| 1 | 2.401389  | 1.306387  | 1.639749  |
| 6 | 1.592003  | 3.160626  | -1.667097 |
| 1 | 0.651365  | 1.337854  | -2.307693 |
| 6 | 2.268336  | 3.824445  | -0.641451 |
| 1 | 3.079045  | 3.652982  | 1.353855  |
| 1 | 1.378067  | 3.672171  | -2.601246 |
| 1 | 2.578811  | 4.85701   | -0.769789 |
| 6 | 2.816554  | -1.190916 | -0.087288 |
| 6 | 3.533717  | -1.468284 | 1.084757  |
| 6 | 3.506607  | -1.187055 | -1.311074 |
| 6 | 4.902375  | -1.751632 | 1.034149  |
| 1 | 3.031511  | -1.476494 | 2.045033  |
| 6 | 4.872058  | -1.481782 | -1.362541 |
| 1 | 2.986266  | -0.961579 | -2.236103 |
| 6 | 5.576381  | -1.764452 | -0.189247 |
| 1 | 5.43709   | -1.965595 | 1.955202  |
| 1 | 5.380805  | -1.489928 | -2.322254 |
| 1 | 6.637495  | -1.992267 | -0.228312 |

**PC<sub>IIIb-r</sub>**

E = -4409.783904    ZPVE = 0.342671    NIMAG = 0.

|    |           |           |           |
|----|-----------|-----------|-----------|
| 17 | -2.831932 | -3.050278 | -0.896987 |
| 15 | 1.0941    | 0.077369  | -0.384567 |
| 12 | -2.525745 | -0.756409 | -0.7272   |
| 35 | -4.190507 | 1.034005  | -1.05325  |
| 5  | -0.237073 | -0.123643 | -1.803906 |
| 1  | -0.500759 | -1.304393 | -1.862475 |
| 1  | -1.19291  | 0.567639  | -1.518145 |
| 1  | 0.25121   | 0.284979  | -2.824393 |
| 6  | 0.776187  | -0.98938  | 1.080638  |
| 6  | -0.505415 | -1.059313 | 1.650744  |
| 6  | 1.783519  | -1.798275 | 1.632335  |
| 6  | -0.786326 | -1.902276 | 2.722678  |
| 6  | 1.518696  | -2.634756 | 2.71788   |
| 1  | 2.781309  | -1.775934 | 1.208741  |
| 6  | 0.233546  | -2.688654 | 3.261379  |
| 1  | -1.794127 | -1.950591 | 3.120652  |
| 1  | 2.31369   | -3.247876 | 3.129521  |
| 1  | 0.017424  | -3.349614 | 4.094517  |
| 8  | -1.532604 | -0.277555 | 1.101328  |
| 6  | -2.061751 | 0.761657  | 1.98745   |
| 1  | -1.250343 | 1.438756  | 2.259342  |
| 1  | -2.825424 | 1.280082  | 1.410288  |
| 1  | -2.500978 | 0.302498  | 2.874308  |
| 6  | 1.231359  | 1.793888  | 0.228579  |
| 6  | 1.646155  | 2.083832  | 1.538428  |
| 6  | 0.929804  | 2.845091  | -0.653279 |
| 6  | 1.759368  | 3.41127   | 1.959025  |
| 1  | 1.877224  | 1.281234  | 2.232032  |
| 6  | 1.049427  | 4.169948  | -0.228424 |
| 1  | 0.606922  | 2.633697  | -1.667738 |

|   |          |           |           |
|---|----------|-----------|-----------|
| 6 | 1.460927 | 4.454349  | 1.077265  |
| 1 | 2.078234 | 3.62769   | 2.974058  |
| 1 | 0.812372 | 4.976902  | -0.914659 |
| 1 | 1.547068 | 5.485214  | 1.407111  |
| 6 | 2.744102 | -0.417262 | -1.005203 |
| 6 | 2.826381 | -1.510614 | -1.884907 |
| 6 | 3.913074 | 0.267335  | -0.6402   |
| 6 | 4.06558  | -1.916358 | -2.382992 |
| 1 | 1.928735 | -2.041699 | -2.185296 |
| 6 | 5.150255 | -0.139549 | -1.147511 |
| 1 | 3.86447  | 1.120456  | 0.028212  |
| 6 | 5.228509 | -1.231389 | -2.016024 |
| 1 | 4.11996  | -2.76163  | -3.062052 |
| 1 | 6.049249 | 0.39934   | -0.864376 |
| 1 | 6.190515 | -1.544433 | -2.410451 |

**R1<sub>IV</sub> + b** S<sub>N</sub>2@P-f pathways in THF

**RC<sub>IVb-r</sub>**

E = -4217.959327      ZPVE = 0.286950      NIMAG = 0.

|    |           |           |           |
|----|-----------|-----------|-----------|
| 17 | 1.447039  | 2.404268  | -0.032883 |
| 15 | 2.073754  | 0.602052  | 0.794495  |
| 12 | -1.702944 | -0.970327 | -0.217335 |
| 35 | -1.79967  | -3.442375 | -0.088881 |
| 6  | 2.391056  | 1.038368  | 2.535129  |
| 1  | 2.766623  | 0.143357  | 3.039954  |
| 1  | 3.125594  | 1.840798  | 2.6197    |
| 1  | 1.452615  | 1.348876  | 2.999611  |
| 5  | 0.74632   | -0.78326  | 0.579735  |
| 1  | -0.202596 | -0.41411  | 1.243503  |

|   |           |           |           |
|---|-----------|-----------|-----------|
| 1 | 0.521763  | -0.90037  | -0.60662  |
| 1 | 1.25242   | -1.772003 | 1.045616  |
| 6 | -2.753223 | 0.66881   | -1.082312 |
| 6 | -3.100063 | 1.403931  | -2.222723 |
| 6 | -3.32876  | 1.112916  | 0.116198  |
| 6 | -3.960982 | 2.515276  | -2.159405 |
| 6 | -4.190657 | 2.201536  | 0.240846  |
| 6 | -4.503002 | 2.906791  | -0.93336  |
| 1 | -4.21049  | 3.067411  | -3.062259 |
| 1 | -4.616329 | 2.507641  | 1.190991  |
| 1 | -5.171979 | 3.761322  | -0.8779   |
| 6 | 3.671161  | 0.243141  | 0.014572  |
| 6 | 4.789634  | 1.066913  | 0.232859  |
| 6 | 3.785277  | -0.887185 | -0.81133  |
| 6 | 6.009503  | 0.755834  | -0.3659   |
| 1 | 4.715014  | 1.951509  | 0.857257  |
| 6 | 5.01217   | -1.193644 | -1.404792 |
| 1 | 2.928657  | -1.528904 | -0.986036 |
| 6 | 6.122091  | -0.375145 | -1.182827 |
| 1 | 6.870592  | 1.394172  | -0.195242 |
| 1 | 5.096862  | -2.070889 | -2.038215 |
| 1 | 7.074377  | -0.615548 | -1.645573 |
| 8 | -2.914384 | 0.309522  | 1.200603  |
| 6 | -3.434257 | 0.548942  | 2.510879  |
| 1 | -2.963073 | -0.182942 | 3.167222  |
| 1 | -3.181273 | 1.559951  | 2.847242  |
| 1 | -4.521028 | 0.414219  | 2.524941  |
| 1 | -2.696168 | 1.120472  | -3.194288 |



**TSIVb-r**

E = -4217.906595      ZPVE = 0.287640      NIMAG = 1.

|    |           |           |           |
|----|-----------|-----------|-----------|
| 17 | -1.260267 | 2.735658  | 0.018469  |
| 15 | -1.439285 | 0.751106  | -1.041976 |
| 12 | 1.660843  | -0.383555 | -1.148235 |
| 35 | 3.696179  | -1.581134 | -0.529275 |
| 6  | -2.692751 | 1.62185   | -2.158577 |
| 1  | -3.091935 | 0.861167  | -2.837862 |
| 1  | -3.511182 | 2.083183  | -1.60364  |
| 1  | -2.182172 | 2.389895  | -2.745867 |
| 5  | -0.270711 | 0.029289  | -2.451348 |
| 1  | 0.67669   | 0.790963  | -2.540482 |
| 1  | 0.048009  | -1.088906 | -2.056634 |
| 1  | -0.828111 | -0.057417 | -3.508751 |
| 6  | 0.054864  | 0.236191  | 0.684505  |
| 6  | -0.472515 | -0.443085 | 1.797229  |
| 6  | 1.235636  | 0.959316  | 0.943899  |
| 6  | 0.101746  | -0.36919  | 3.07198   |
| 6  | 1.839423  | 1.063581  | 2.19689   |
| 6  | 1.247181  | 0.401417  | 3.275608  |
| 1  | -0.350702 | -0.90587  | 3.901025  |
| 1  | 2.7542    | 1.626321  | 2.341836  |
| 1  | 1.695463  | 0.477134  | 4.261617  |
| 6  | -2.637521 | -0.454011 | -0.336525 |
| 6  | -3.73259  | 0.001295  | 0.41335   |
| 6  | -2.50731  | -1.826299 | -0.598143 |
| 6  | -4.683314 | -0.902089 | 0.893698  |
| 1  | -3.841705 | 1.058704  | 0.635001  |
| 6  | -3.469355 | -2.725999 | -0.128668 |

|   |           |           |           |
|---|-----------|-----------|-----------|
| 1 | -1.663115 | -2.201373 | -1.166009 |
| 6 | -4.556588 | -2.267725 | 0.620016  |
| 1 | -5.522208 | -0.537929 | 1.479269  |
| 1 | -3.36121  | -3.784696 | -0.344973 |
| 1 | -5.298967 | -2.969103 | 0.988856  |
| 8 | 1.840983  | 1.485482  | -0.217233 |
| 6 | 3.000461  | 2.335105  | -0.105547 |
| 1 | 3.221351  | 2.665798  | -1.119945 |
| 1 | 2.764778  | 3.19725   | 0.522404  |
| 1 | 3.848799  | 1.779776  | 0.302924  |
| 1 | -1.37903  | -1.02776  | 1.686692  |

**PC<sub>IVb-r</sub>**

E = -4217.999720    ZPVE = 0.290182    NIMAG = 0.

|    |           |           |           |
|----|-----------|-----------|-----------|
| 17 | 1.173274  | 4.942222  | -0.651989 |
| 15 | -1.342394 | 0.088515  | -0.857047 |
| 12 | 1.848509  | -1.381032 | -1.336296 |
| 35 | 3.549547  | -2.341961 | 0.099612  |
| 6  | -1.556134 | 1.675362  | -1.738221 |
| 1  | -2.148911 | 1.505061  | -2.640459 |
| 1  | -2.04143  | 2.418337  | -1.103369 |
| 1  | -0.570964 | 2.053206  | -2.019152 |
| 5  | -0.458771 | -1.240937 | -1.986688 |
| 1  | 0.417433  | -0.660303 | -2.608835 |
| 1  | -0.035106 | -2.115431 | -1.240095 |
| 1  | -1.24434  | -1.720148 | -2.751973 |
| 6  | -0.439738 | 0.453772  | 0.701206  |
| 6  | -1.128561 | 0.534427  | 1.922302  |

|   |           |           |           |
|---|-----------|-----------|-----------|
| 6 | 0.946414  | 0.691982  | 0.707786  |
| 6 | -0.461063 | 0.854002  | 3.10469   |
| 6 | 1.624323  | 1.005243  | 1.883448  |
| 6 | 0.913967  | 1.090472  | 3.082049  |
| 1 | -1.014931 | 0.919168  | 4.035179  |
| 1 | 2.692994  | 1.179684  | 1.870882  |
| 1 | 1.443203  | 1.338083  | 3.996462  |
| 6 | -2.991527 | -0.521289 | -0.372516 |
| 6 | -4.093911 | 0.3404    | -0.257945 |
| 6 | -3.157063 | -1.894184 | -0.120302 |
| 6 | -5.344816 | -0.166883 | 0.103553  |
| 1 | -3.991747 | 1.403272  | -0.448083 |
| 6 | -4.408296 | -2.39466  | 0.241934  |
| 1 | -2.316265 | -2.574844 | -0.207435 |
| 6 | -5.503476 | -1.532304 | 0.353731  |
| 1 | -6.191951 | 0.506619  | 0.187124  |
| 1 | -4.5268   | -3.456622 | 0.433188  |
| 1 | -6.477109 | -1.924211 | 0.631582  |
| 8 | 1.633436  | 0.567745  | -0.507379 |
| 6 | 2.6769    | 1.570951  | -0.778933 |
| 1 | 2.913697  | 1.460687  | -1.837365 |
| 1 | 2.268146  | 2.566503  | -0.585939 |
| 1 | 3.559841  | 1.360268  | -0.174295 |
| 1 | -2.197492 | 0.355184  | 1.94701   |

**R1v + b** S<sub>N</sub>2@P-f pathways in THF

**RC<sub>v</sub>b-r**

E = -4026.218110      ZPVE = 0.232766      NIMAG = 0.

|    |           |           |           |
|----|-----------|-----------|-----------|
| 17 | -4.584569 | -0.278476 | -0.732745 |
|----|-----------|-----------|-----------|

|    |           |           |           |
|----|-----------|-----------|-----------|
| 15 | -2.871504 | 0.2056    | 0.32556   |
| 12 | 0.962169  | -0.825315 | -0.525139 |
| 35 | 1.707698  | -3.173008 | -0.35773  |
| 6  | -2.436798 | 1.864566  | -0.284654 |
| 1  | -2.196953 | 1.809976  | -1.348292 |
| 1  | -3.25983  | 2.563534  | -0.121108 |
| 1  | -1.548263 | 2.202784  | 0.256814  |
| 6  | -3.458378 | 0.404212  | 2.038075  |
| 1  | -2.610919 | 0.736979  | 2.645989  |
| 1  | -4.260089 | 1.143685  | 2.09109   |
| 1  | -3.810203 | -0.558237 | 2.415624  |
| 5  | -1.543039 | -1.181452 | 0.102291  |
| 1  | -1.22268  | -1.170011 | -1.067665 |
| 1  | -0.661005 | -0.842051 | 0.871016  |
| 1  | -2.03884  | -2.220589 | 0.443616  |
| 6  | 1.393609  | 1.226938  | -0.936962 |
| 6  | 1.912247  | 1.505575  | 0.336662  |
| 6  | 1.394504  | 2.306281  | -1.830236 |
| 6  | 2.414241  | 2.738199  | 0.751941  |
| 6  | 1.884444  | 3.574878  | -1.467829 |
| 1  | 1.011851  | 2.173133  | -2.841871 |
| 6  | 2.39258   | 3.785265  | -0.183956 |
| 1  | 2.811604  | 2.903003  | 1.748376  |
| 1  | 1.874835  | 4.391126  | -2.186064 |
| 1  | 2.777829  | 4.760793  | 0.100025  |
| 8  | 1.852694  | 0.364916  | 1.163596  |
| 6  | 2.47611   | 0.368357  | 2.450722  |
| 1  | 2.005868  | 1.107693  | 3.107573  |
| 1  | 2.3335    | -0.631642 | 2.8599    |
| 1  | 3.546323  | 0.581279  | 2.357653  |

**TS<sub>vb-r</sub>**

E = -4026.164249    ZPVE = 0.234226    NIMAG = 1.

|    |           |           |           |
|----|-----------|-----------|-----------|
| 17 | -2.22919  | -1.250397 | -1.703594 |
| 15 | -2.224417 | -0.573954 | 0.486419  |
| 12 | 0.76213   | -1.025234 | 0.401712  |
| 35 | 2.982342  | -1.376442 | -0.545339 |
| 6  | -2.614768 | 0.97412   | 1.445813  |
| 1  | -1.713298 | 1.368865  | 1.912478  |
| 1  | -3.034056 | 1.732988  | 0.780578  |
| 1  | -3.359624 | 0.722845  | 2.206643  |
| 6  | -3.977864 | -1.23575  | 0.549173  |
| 1  | -4.282104 | -1.253599 | 1.600851  |
| 1  | -4.662976 | -0.593449 | -0.011098 |
| 1  | -4.018867 | -2.245753 | 0.141589  |
| 5  | -1.151736 | -1.901935 | 1.46721   |
| 1  | -0.562101 | -2.573463 | 0.629862  |
| 1  | -0.391507 | -1.303514 | 2.200658  |
| 1  | -1.881481 | -2.625511 | 2.084927  |
| 6  | -0.495221 | 0.866441  | -0.352026 |
| 6  | 0.457626  | 1.530638  | 0.450473  |
| 6  | -0.904167 | 1.577964  | -1.492593 |
| 6  | 0.983658  | 2.790857  | 0.167707  |
| 6  | -0.415072 | 2.852304  | -1.803365 |
| 1  | -1.641602 | 1.137149  | -2.153671 |
| 6  | 0.521363  | 3.462019  | -0.967879 |
| 1  | 1.739136  | 3.244437  | 0.79846   |
| 1  | -0.77047  | 3.365488  | -2.692016 |

|   |          |          |           |
|---|----------|----------|-----------|
| 1 | 0.907303 | 4.450464 | -1.198028 |
| 8 | 0.918988 | 0.752986 | 1.525828  |
| 6 | 1.969582 | 1.242513 | 2.382156  |
| 1 | 1.651814 | 2.166828 | 2.869993  |
| 1 | 2.123992 | 0.466373 | 3.1308    |
| 1 | 2.88675  | 1.403324 | 1.809702  |

**PC<sub>v</sub>-r**

E = -4026.298634    ZPVE = 0.236070    NIMAG = 0.

|    |              |              |              |
|----|--------------|--------------|--------------|
| 17 | 1.476656000  | -1.657980000 | -1.804634000 |
| 15 | -2.279782000 | 0.156956000  | 1.079046000  |
| 12 | 0.960970000  | -1.482979000 | 0.455996000  |
| 35 | 2.318903000  | -2.406003000 | 2.316730000  |
| 6  | -2.340097000 | 0.791593000  | 2.797297000  |
| 1  | -1.329267000 | 0.855875000  | 3.204713000  |
| 1  | -2.811516000 | 1.776735000  | 2.826859000  |
| 1  | -2.917105000 | 0.089548000  | 3.406007000  |
| 6  | -4.015149000 | 0.166491000  | 0.505186000  |
| 1  | -4.554496000 | -0.579691000 | 1.094311000  |
| 1  | -4.485201000 | 1.141461000  | 0.651903000  |
| 1  | -4.066985000 | -0.120121000 | -0.547679000 |
| 5  | -1.517703000 | -1.633452000 | 0.957701000  |
| 1  | -1.136352000 | -1.777159000 | -0.187570000 |
| 1  | -0.624884000 | -1.708217000 | 1.777176000  |
| 1  | -2.384898000 | -2.422513000 | 1.230408000  |
| 6  | -1.390945000 | 1.405716000  | 0.069661000  |
| 6  | 0.010191000  | 1.492458000  | 0.116541000  |
| 6  | -2.070257000 | 2.267422000  | -0.807965000 |

|   |              |             |              |
|---|--------------|-------------|--------------|
| 6 | 0.717497000  | 2.394018000 | -0.674793000 |
| 6 | -1.374869000 | 3.186026000 | -1.595690000 |
| 1 | -3.150657000 | 2.226038000 | -0.883579000 |
| 6 | 0.018385000  | 3.249255000 | -1.528127000 |
| 1 | 1.800785000  | 2.417084000 | -0.636877000 |
| 1 | -1.921313000 | 3.842323000 | -2.264914000 |
| 1 | 0.566325000  | 3.950278000 | -2.149377000 |
| 8 | 0.700364000  | 0.604824000 | 0.958357000  |
| 6 | 1.542406000  | 1.229361000 | 1.977812000  |
| 1 | 0.928485000  | 1.901468000 | 2.580638000  |
| 1 | 1.933316000  | 0.409013000 | 2.577380000  |
| 1 | 2.361839000  | 1.775100000 | 1.507826000  |

**R1<sub>1</sub> + b** S<sub>N2</sub>@Cl pathway, followed by S<sub>N2</sub>@C-f pathway in THF

**RC<sub>1</sub>**

E = -4570.588985      ZPVE = 0.520893      NIMAG = 0.

|   |           |           |           |
|---|-----------|-----------|-----------|
| 6 | -2.430889 | -0.549444 | -1.194511 |
| 6 | -2.916212 | -2.984389 | -0.562052 |
| 6 | -0.591217 | -2.355995 | -1.443035 |
| 6 | -1.211355 | -1.063735 | -1.996268 |
| 6 | -1.673118 | -3.441684 | -1.342498 |
| 6 | -4.863615 | -1.247645 | -0.460524 |
| 6 | 0.595895  | -2.811048 | -2.301131 |
| 6 | -5.565773 | -0.149907 | -1.280867 |
| 6 | -5.834819 | -2.428977 | -0.279928 |
| 1 | -2.846866 | 0.301019  | -1.744275 |
| 1 | -3.667297 | -3.777046 | -0.618566 |
| 1 | -2.667989 | -2.864671 | 0.49796   |

|    |           |           |           |
|----|-----------|-----------|-----------|
| 1  | -0.216379 | -2.155547 | -0.429431 |
| 1  | -0.453546 | -0.281521 | -2.089279 |
| 1  | -1.577079 | -1.258064 | -3.015055 |
| 1  | -1.256377 | -4.34199  | -0.873886 |
| 1  | -1.973831 | -3.730222 | -2.361534 |
| 1  | -4.658603 | -0.850002 | 0.542642  |
| 1  | 1.380366  | -2.046157 | -2.335865 |
| 1  | 1.039837  | -3.729887 | -1.901858 |
| 1  | 0.279376  | -3.012887 | -3.33235  |
| 1  | -5.821889 | -0.525434 | -2.27979  |
| 1  | -6.496704 | 0.156907  | -0.79237  |
| 1  | -4.955818 | 0.748     | -1.405815 |
| 1  | -6.013121 | -2.943312 | -1.233022 |
| 1  | -6.801056 | -2.064112 | 0.08472   |
| 1  | -5.469616 | -3.165781 | 0.440156  |
| 6  | -3.10624  | 1.630268  | 0.727532  |
| 6  | -3.849279 | 1.708459  | 1.915671  |
| 6  | -3.220011 | 2.654085  | -0.228691 |
| 6  | -4.709674 | 2.788328  | 2.134123  |
| 1  | -3.757587 | 0.931827  | 2.666869  |
| 6  | -4.073525 | 3.733433  | -0.002371 |
| 1  | -2.635454 | 2.622526  | -1.143436 |
| 6  | -4.822508 | 3.800289  | 1.178177  |
| 1  | -5.283818 | 2.838587  | 3.054183  |
| 1  | -4.151877 | 4.521999  | -0.744476 |
| 1  | -5.486898 | 4.641362  | 1.352204  |
| 17 | -0.16805  | 1.189864  | 0.097063  |
| 6  | -3.518929 | -1.675777 | -1.117211 |
| 1  | -3.754383 | -1.868298 | -2.177343 |
| 15 | -1.983083 | 0.206439  | 0.482569  |



|    |           |           |           |
|----|-----------|-----------|-----------|
| 5  | -1.741996 | -0.859023 | 2.096684  |
| 1  | -1.382981 | -0.048294 | 2.920434  |
| 1  | -2.832628 | -1.329453 | 2.333167  |
| 1  | -0.909889 | -1.692833 | 1.837579  |
| 6  | 3.5096    | 3.09059   | 0.374831  |
| 6  | 3.907013  | 4.043331  | -0.581105 |
| 6  | 4.640034  | 3.644548  | -1.700856 |
| 6  | 4.986807  | 2.295579  | -1.881794 |
| 6  | 4.568229  | 1.397643  | -0.901964 |
| 6  | 3.831125  | 1.734866  | 0.241179  |
| 1  | 2.935804  | 3.430108  | 1.236046  |
| 1  | 3.644169  | 5.090181  | -0.451534 |
| 1  | 4.949014  | 4.376293  | -2.442213 |
| 1  | 5.556678  | 1.98994   | -2.753133 |
| 8  | 4.837162  | 0.011369  | -0.936646 |
| 6  | 5.616326  | -0.545219 | -2.000455 |
| 1  | 5.699188  | -1.612385 | -1.795838 |
| 1  | 5.117297  | -0.391099 | -2.962684 |
| 1  | 6.613712  | -0.094241 | -2.021876 |
| 12 | 3.733536  | -0.249463 | 0.990357  |
| 35 | 3.716068  | -2.388505 | 2.182829  |

**TS1r**

E = -4570.538474      ZPVE = 0.520932      NIMAG = 1.

|   |          |           |          |
|---|----------|-----------|----------|
| 6 | 2.246512 | -0.458082 | 1.131858 |
| 6 | 2.913036 | -2.798616 | 0.3607   |
| 6 | 0.63996  | -2.452306 | 1.489924 |
| 6 | 1.166702 | -1.112285 | 2.025652 |

|   |           |           |           |
|---|-----------|-----------|-----------|
| 6 | 1.814488  | -3.411581 | 1.244359  |
| 6 | 4.640141  | -0.856519 | 0.14516   |
| 6 | -0.405965 | -3.061089 | 2.431992  |
| 6 | 5.286904  | 0.305553  | 0.921782  |
| 6 | 5.722108  | -1.905888 | -0.171009 |
| 1 | 2.625006  | 0.411933  | 1.676631  |
| 1 | 3.739706  | -3.512214 | 0.294082  |
| 1 | 2.535115  | -2.657275 | -0.657964 |
| 1 | 0.155286  | -2.271136 | 0.519791  |
| 1 | 0.337116  | -0.415812 | 2.188784  |
| 1 | 1.622471  | -1.288036 | 3.012195  |
| 1 | 1.44957   | -4.341835 | 0.79019   |
| 1 | 2.248593  | -3.689267 | 2.217681  |
| 1 | 4.275473  | -0.466645 | -0.814095 |
| 1 | -1.227395 | -2.361577 | 2.629176  |
| 1 | -0.837344 | -3.973404 | 2.005701  |
| 1 | 0.043407  | -3.319881 | 3.399241  |
| 1 | 5.670266  | -0.044194 | 1.889447  |
| 1 | 6.132291  | 0.718354  | 0.360125  |
| 1 | 4.592535  | 1.128003  | 1.110843  |
| 1 | 6.063945  | -2.4106   | 0.742329  |
| 1 | 6.593206  | -1.421116 | -0.625785 |
| 1 | 5.372308  | -2.671185 | -0.86909  |
| 6 | 2.320678  | 1.954613  | -0.588559 |
| 6 | 2.88515   | 2.363207  | -1.810277 |
| 6 | 2.320801  | 2.863763  | 0.487525  |
| 6 | 3.451994  | 3.63424   | -1.944361 |
| 1 | 2.884986  | 1.682349  | -2.654879 |
| 6 | 2.889781  | 4.131331  | 0.353399  |
| 1 | 1.870818  | 2.586317  | 1.437097  |

|    |           |           |           |
|----|-----------|-----------|-----------|
| 6  | 3.459304  | 4.521244  | -0.864086 |
| 1  | 3.891226  | 3.928169  | -2.893583 |
| 1  | 2.882252  | 4.816245  | 1.196682  |
| 1  | 3.900494  | 5.508121  | -0.969131 |
| 17 | -0.848172 | 1.103361  | -0.017397 |
| 6  | 3.431101  | -1.455693 | 0.917645  |
| 1  | 3.797364  | -1.663824 | 1.938965  |
| 15 | 1.51538   | 0.316019  | -0.444156 |
| 5  | 1.445022  | -0.641396 | -2.160322 |
| 1  | 0.928821  | 0.168734  | -2.909244 |
| 1  | 2.554957  | -0.967359 | -2.527241 |
| 1  | 0.718762  | -1.595897 | -1.977874 |
| 6  | -2.889004 | 3.334442  | 0.663379  |
| 6  | -4.076646 | 3.973739  | 1.055078  |
| 6  | -5.269701 | 3.249767  | 1.090787  |
| 6  | -5.293374 | 1.89525   | 0.731589  |
| 6  | -4.094371 | 1.292394  | 0.34319   |
| 6  | -2.89737  | 1.99381   | 0.300606  |
| 1  | -1.956313 | 3.896083  | 0.648111  |
| 1  | -4.065588 | 5.023608  | 1.334932  |
| 1  | -6.193836 | 3.730327  | 1.397232  |
| 1  | -6.229814 | 1.349261  | 0.76171   |
| 8  | -4.025667 | -0.062298 | -0.055435 |
| 6  | -5.208345 | -0.891425 | 0.060475  |
| 1  | -4.905474 | -1.883287 | -0.270252 |
| 1  | -5.534103 | -0.919272 | 1.102639  |
| 1  | -5.999595 | -0.503336 | -0.584606 |
| 12 | -2.234425 | -0.688489 | -0.857758 |
| 35 | -2.479379 | -3.050279 | -1.390412 |

**INT1**

E = -4570.594581      ZPVE = 0.525857      NIMAG = 0.

|   |          |           |           |
|---|----------|-----------|-----------|
| 6 | 2.325025 | -0.177494 | -0.780942 |
| 6 | 4.576651 | 0.250826  | 0.334256  |
| 6 | 3.146916 | 2.244367  | -0.427543 |
| 6 | 2.376511 | 1.266864  | -1.328722 |
| 6 | 4.562641 | 1.700552  | -0.177436 |
| 6 | 3.881577 | -2.205385 | -0.206334 |
| 6 | 3.180732 | 3.655928  | -1.026262 |
| 6 | 3.364616 | -3.105569 | -1.344121 |
| 6 | 5.315796 | -2.637724 | 0.150852  |
| 1 | 1.84429  | -0.789757 | -1.551055 |
| 1 | 5.617771 | -0.080432 | 0.398406  |
| 1 | 4.166912 | 0.210647  | 1.348434  |
| 1 | 2.626959 | 2.300388  | 0.539772  |
| 1 | 1.36424  | 1.640622  | -1.517272 |
| 1 | 2.876338 | 1.232221  | -2.309623 |
| 1 | 5.088822 | 2.349587  | 0.534953  |
| 1 | 5.127107 | 1.753741  | -1.121937 |
| 1 | 3.258109 | -2.378011 | 0.679376  |
| 1 | 2.169264 | 4.057016  | -1.151758 |
| 1 | 3.735483 | 4.344739  | -0.378256 |
| 1 | 3.672128 | 3.652626  | -2.008086 |
| 1 | 3.97597  | -2.97316  | -2.246852 |
| 1 | 3.422795 | -4.161416 | -1.056609 |
| 1 | 2.324497 | -2.898926 | -1.607404 |
| 1 | 6.015634 | -2.400373 | -0.661575 |
| 1 | 5.352799 | -3.72112  | 0.311834  |

|    |           |           |           |
|----|-----------|-----------|-----------|
| 1  | 5.682665  | -2.158604 | 1.0626    |
| 6  | 0.331834  | -2.002657 | 0.425663  |
| 6  | 0.33482   | -2.974841 | 1.439297  |
| 6  | -0.335531 | -2.301831 | -0.776457 |
| 6  | -0.287166 | -4.213817 | 1.248589  |
| 1  | 0.839482  | -2.765895 | 2.37636   |
| 6  | -0.956713 | -3.537661 | -0.970438 |
| 1  | -0.372362 | -1.564356 | -1.575118 |
| 6  | -0.934002 | -4.501446 | 0.043809  |
| 1  | -0.263519 | -4.953696 | 2.044173  |
| 1  | -1.461766 | -3.745585 | -1.909843 |
| 1  | -1.417109 | -5.462997 | -0.104159 |
| 17 | -3.047984 | 0.322595  | 1.92449   |
| 6  | 3.782301  | -0.7011   | -0.584919 |
| 1  | 4.241709  | -0.614667 | -1.58674  |
| 15 | 1.117424  | -0.342975 | 0.698908  |
| 5  | 1.840466  | -0.281672 | 2.547068  |
| 1  | 0.85039   | -0.442146 | 3.245236  |
| 1  | 2.667807  | -1.150489 | 2.739501  |
| 1  | 2.29979   | 0.833301  | 2.701227  |
| 6  | -4.962101 | -1.150022 | 0.664319  |
| 6  | -5.639485 | -1.630295 | -0.458625 |
| 6  | -5.225726 | -1.242445 | -1.73293  |
| 6  | -4.138185 | -0.380825 | -1.89925  |
| 6  | -3.457339 | 0.107694  | -0.781539 |
| 6  | -3.882976 | -0.289947 | 0.492729  |
| 1  | -5.265531 | -1.436033 | 1.665219  |
| 1  | -6.482921 | -2.29994  | -0.330466 |
| 1  | -5.744149 | -1.610535 | -2.612036 |
| 1  | -3.829397 | -0.098179 | -2.89748  |

|    |           |          |           |
|----|-----------|----------|-----------|
| 8  | -2.365666 | 0.955152 | -0.87184  |
| 6  | -2.11008  | 1.594709 | -2.155356 |
| 1  | -1.355458 | 2.353928 | -1.956818 |
| 1  | -1.743711 | 0.85676  | -2.871511 |
| 1  | -3.024869 | 2.071941 | -2.510084 |
| 12 | -0.844728 | 1.297702 | 0.625919  |
| 35 | -0.709908 | 3.751336 | 0.484404  |

## INT2<sub>t</sub>

E = -4570.588302      ZPVE = 0.521492      NIMAG = 0.

|    |           |           |           |
|----|-----------|-----------|-----------|
| 17 | 3.733669  | 0.391084  | 2.435665  |
| 15 | -1.350592 | 0.537688  | 0.287151  |
| 12 | 2.29841   | -1.087503 | -0.854363 |
| 35 | 3.462255  | -3.092691 | -1.626683 |
| 5  | 0.290439  | -0.30573  | -0.371264 |
| 1  | 0.742986  | 0.359228  | -1.304335 |
| 1  | 1.108104  | -0.273039 | 0.551497  |
| 1  | 0.18303   | -1.469141 | -0.752916 |
| 6  | 3.42203   | 1.768237  | 1.397086  |
| 6  | 3.467737  | 1.623946  | 0.006166  |
| 6  | 3.118369  | 3.008761  | 1.959734  |
| 6  | 3.215278  | 2.714227  | -0.824047 |
| 6  | 2.869855  | 4.101381  | 1.12645   |
| 1  | 3.075789  | 3.110517  | 3.038382  |
| 6  | 2.918375  | 3.957366  | -0.262988 |
| 1  | 3.249345  | 2.575477  | -1.899923 |
| 1  | 2.633246  | 5.06374   | 1.568414  |
| 1  | 2.719195  | 4.805806  | -0.909118 |

|   |           |           |           |
|---|-----------|-----------|-----------|
| 8 | 3.7576    | 0.378365  | -0.564656 |
| 6 | 5.180133  | 0.159846  | -0.836598 |
| 1 | 5.739521  | 0.245147  | 0.096567  |
| 1 | 5.256612  | -0.848744 | -1.239224 |
| 1 | 5.518445  | 0.898915  | -1.564826 |
| 6 | -3.673014 | 1.284163  | -1.384764 |
| 6 | -2.492752 | 0.275928  | -1.240539 |
| 6 | -4.861165 | 0.85464   | -0.50131  |
| 6 | -4.214815 | -1.605844 | -0.710169 |
| 6 | -2.981155 | -1.164287 | -1.518388 |
| 6 | -5.337534 | -0.566018 | -0.838272 |
| 6 | -3.28683  | 2.779556  | -1.214591 |
| 6 | -4.683539 | -3.003053 | -1.136914 |
| 6 | -2.086488 | 3.175224  | -2.093062 |
| 6 | -4.465609 | 3.722177  | -1.524162 |
| 1 | -4.009766 | 1.178626  | -2.432742 |
| 1 | -1.774954 | 0.512869  | -2.034571 |
| 1 | -5.699957 | 1.546577  | -0.626277 |
| 1 | -4.568754 | 0.907051  | 0.556612  |
| 1 | -3.931092 | -1.655982 | 0.347367  |
| 1 | -2.160673 | -1.874841 | -1.361309 |
| 1 | -3.240247 | -1.228626 | -2.588613 |
| 1 | -6.178568 | -0.845626 | -0.189587 |
| 1 | -5.723004 | -0.577435 | -1.870172 |
| 1 | -2.996918 | 2.935511  | -0.166691 |
| 1 | -3.887951 | -3.746777 | -1.009428 |
| 1 | -5.545944 | -3.330078 | -0.543817 |
| 1 | -4.982416 | -3.01163  | -2.193395 |
| 1 | -2.289357 | 2.966095  | -3.152082 |
| 1 | -1.880877 | 4.247772  | -1.999877 |

|   |           |           |           |
|---|-----------|-----------|-----------|
| 1 | -1.173679 | 2.642962  | -1.811437 |
| 1 | -4.841949 | 3.560237  | -2.543161 |
| 1 | -4.144764 | 4.767764  | -1.453064 |
| 1 | -5.303517 | 3.592688  | -0.8336   |
| 6 | -1.906042 | -0.626225 | 1.63501   |
| 6 | -2.752327 | -0.122199 | 2.641094  |
| 6 | -1.475814 | -1.960064 | 1.754832  |
| 6 | -3.176966 | -0.921432 | 3.706282  |
| 1 | -3.078239 | 0.913844  | 2.591631  |
| 6 | -1.889817 | -2.762831 | 2.823052  |
| 1 | -0.813396 | -2.381739 | 1.006134  |
| 6 | -2.747984 | -2.24951  | 3.800272  |
| 1 | -3.833956 | -0.50529  | 4.465478  |
| 1 | -1.542013 | -3.790635 | 2.889693  |
| 1 | -3.070162 | -2.872996 | 4.629585  |

**TS2<sub>t</sub>**

E = -4570.525859      ZPVE = 0.522896      NIMAG = 1.

|    |           |           |           |
|----|-----------|-----------|-----------|
| 17 | -0.488545 | -1.982888 | 2.390261  |
| 15 | 0.547138  | 0.180418  | 0.300882  |
| 12 | -3.091149 | 0.75557   | 0.085883  |
| 35 | -5.204526 | 1.836558  | -0.397931 |
| 5  | -0.886206 | 1.48703   | 0.638016  |
| 1  | -1.448851 | 1.591675  | -0.454899 |
| 1  | -1.617752 | 1.060195  | 1.516564  |
| 1  | -0.497037 | 2.5897    | 0.911955  |
| 6  | -0.477134 | -1.981669 | 0.346435  |
| 6  | -1.799427 | -1.994708 | -0.170588 |



|   |           |           |           |
|---|-----------|-----------|-----------|
| 6 | 0.379038  | -2.995048 | -0.166343 |
| 6 | -2.180385 | -2.812554 | -1.2336   |
| 6 | -0.013173 | -3.831821 | -1.202111 |
| 1 | 1.360285  | -3.117864 | 0.277784  |
| 6 | -1.288449 | -3.733805 | -1.780563 |
| 1 | -3.20098  | -2.737324 | -1.600038 |
| 1 | 0.691906  | -4.576229 | -1.561704 |
| 1 | -1.5864   | -4.374645 | -2.602947 |
| 8 | -2.812994 | -1.211649 | 0.445831  |
| 6 | -3.734196 | -1.9882   | 1.276271  |
| 1 | -3.1527   | -2.565816 | 1.993596  |
| 1 | -4.37711  | -1.276781 | 1.796697  |
| 1 | -4.334654 | -2.63844  | 0.63771   |
| 6 | 2.668426  | 0.274466  | -1.895496 |
| 6 | 1.249401  | 0.714773  | -1.417848 |
| 6 | 3.778579  | 1.074295  | -1.178255 |
| 6 | 2.196641  | 3.073682  | -0.928205 |
| 6 | 1.125458  | 2.244238  | -1.652844 |
| 6 | 3.593601  | 2.591405  | -1.346505 |
| 6 | 2.876531  | -1.263116 | -1.983994 |
| 6 | 2.007821  | 4.573388  | -1.188869 |
| 6 | 2.087677  | -1.840948 | -3.17333  |
| 6 | 4.350934  | -1.684908 | -2.108442 |
| 1 | 2.699687  | 0.624069  | -2.94181  |
| 1 | 0.508748  | 0.230493  | -2.068918 |
| 1 | 4.751458  | 0.797464  | -1.595465 |
| 1 | 3.8134    | 0.823397  | -0.114284 |
| 1 | 2.086574  | 2.904567  | 0.151983  |
| 1 | 0.131177  | 2.607941  | -1.390653 |
| 1 | 1.233405  | 2.406524  | -2.736766 |

|   |          |           |           |
|---|----------|-----------|-----------|
| 1 | 4.362949 | 3.124397  | -0.772829 |
| 1 | 3.752214 | 2.857127  | -2.403307 |
| 1 | 2.480875 | -1.722189 | -1.07029  |
| 1 | 1.025827 | 4.91535   | -0.842284 |
| 1 | 2.771725 | 5.163704  | -0.66967  |
| 1 | 2.083186 | 4.798447  | -2.260542 |
| 1 | 2.481104 | -1.441735 | -4.117048 |
| 1 | 2.175584 | -2.93149  | -3.208465 |
| 1 | 1.021178 | -1.604727 | -3.124052 |
| 1 | 4.825478 | -1.220939 | -2.98244  |
| 1 | 4.418732 | -2.771124 | -2.235732 |
| 1 | 4.93895  | -1.41853  | -1.2254   |
| 6 | 1.790419 | 0.321251  | 1.652464  |
| 6 | 2.834859 | -0.61422  | 1.772501  |
| 6 | 1.656297 | 1.299852  | 2.65302   |
| 6 | 3.72814  | -0.560057 | 2.84295   |
| 1 | 2.956299 | -1.395397 | 1.03024   |
| 6 | 2.550645 | 1.354803  | 3.725771  |
| 1 | 0.85244  | 2.025055  | 2.597343  |
| 6 | 3.590824 | 0.426973  | 3.824638  |
| 1 | 4.527342 | -1.292423 | 2.912635  |
| 1 | 2.430557 | 2.123467  | 4.484058  |
| 1 | 4.284599 | 0.468144  | 4.659213  |

**PC<sub>1</sub>**

E = -4570.620148    ZPVE = 0.526352    NIMAG = 0.

|    |           |           |           |
|----|-----------|-----------|-----------|
| 17 | -1.915222 | 5.394766  | -1.284623 |
| 15 | 0.570024  | -0.547632 | 0.164743  |

|    |           |           |           |
|----|-----------|-----------|-----------|
| 12 | -2.981391 | -1.233491 | -0.144478 |
| 35 | -5.087881 | -2.432339 | -0.151423 |
| 5  | -0.702354 | -1.895141 | -0.511748 |
| 1  | -1.332447 | -2.289926 | 0.460774  |
| 1  | -1.374278 | -1.324725 | -1.354775 |
| 1  | -0.161649 | -2.824784 | -1.026718 |
| 6  | -0.2471   | 0.473179  | 1.478551  |
| 6  | -1.535681 | 1.009347  | 1.279854  |
| 6  | 0.367774  | 0.752249  | 2.709933  |
| 6  | -2.169455 | 1.793776  | 2.239446  |
| 6  | -0.253473 | 1.539188  | 3.680934  |
| 1  | 1.351518  | 0.363377  | 2.925966  |
| 6  | -1.520707 | 2.069327  | 3.443407  |
| 1  | -3.162496 | 2.183797  | 2.047026  |
| 1  | 0.25997   | 1.737479  | 4.615773  |
| 1  | -2.011651 | 2.684629  | 4.189958  |
| 8  | -2.222275 | 0.692927  | 0.096064  |
| 6  | -2.712874 | 1.831909  | -0.699714 |
| 1  | -1.940627 | 2.598422  | -0.756414 |
| 1  | -2.928488 | 1.428061  | -1.688315 |
| 1  | -3.619604 | 2.233794  | -0.247254 |
| 6  | 3.521474  | -0.75295  | 0.76103   |
| 6  | 2.102524  | -1.387006 | 0.946468  |
| 6  | 4.042869  | -0.959095 | -0.675932 |
| 6  | 2.708094  | -3.136112 | -0.870045 |
| 6  | 2.169236  | -2.884373 | 0.548208  |
| 6  | 4.069619  | -2.448691 | -1.053978 |
| 6  | 3.683969  | 0.6743    | 1.372465  |
| 6  | 2.777029  | -4.63837  | -1.171119 |
| 6  | 3.988722  | 0.569562  | 2.88038   |

|   |          |           |           |
|---|----------|-----------|-----------|
| 6 | 4.766895 | 1.537774  | 0.703872  |
| 1 | 4.153142 | -1.406819 | 1.383399  |
| 1 | 1.848037 | -1.362578 | 2.011258  |
| 1 | 5.059477 | -0.563017 | -0.749087 |
| 1 | 3.441012 | -0.397609 | -1.39758  |
| 1 | 2.009515 | -2.687521 | -1.590021 |
| 1 | 1.196935 | -3.367292 | 0.677787  |
| 1 | 2.846715 | -3.362681 | 1.269502  |
| 1 | 4.403221 | -2.562417 | -2.092918 |
| 1 | 4.813991 | -2.963689 | -0.428134 |
| 1 | 2.740138 | 1.21833   | 1.253394  |
| 1 | 1.788294 | -5.104691 | -1.093954 |
| 1 | 3.155989 | -4.819147 | -2.183144 |
| 1 | 3.446156 | -5.148556 | -0.467122 |
| 1 | 5.006017 | 0.188523  | 3.031331  |
| 1 | 3.921054 | 1.547799  | 3.368004  |
| 1 | 3.313418 | -0.114797 | 3.406395  |
| 1 | 5.755168 | 1.06848   | 0.775115  |
| 1 | 4.826817 | 2.508028  | 1.208731  |
| 1 | 4.553749 | 1.726221  | -0.351922 |
| 6 | 0.96381  | 0.624635  | -1.189573 |
| 6 | 1.192997 | 1.987761  | -0.948724 |
| 6 | 1.000513 | 0.141748  | -2.509351 |
| 6 | 1.469276 | 2.852256  | -2.010539 |
| 1 | 1.140654 | 2.38941   | 0.057473  |
| 6 | 1.286588 | 1.007606  | -3.565704 |
| 1 | 0.80574  | -0.905049 | -2.719448 |
| 6 | 1.522795 | 2.363507  | -3.317986 |
| 1 | 1.627534 | 3.907188  | -1.812812 |
| 1 | 1.314598 | 0.623632  | -4.580787 |

|   |          |          |           |
|---|----------|----------|-----------|
| 1 | 1.733937 | 3.038481 | -4.141565 |
|---|----------|----------|-----------|

**R1<sub>II</sub> + b** S<sub>N</sub>2@Cl pathway, followed by S<sub>N</sub>2@C-f pathway in THF

**RC<sub>II</sub>**

E = -4262.101166      ZPVE = 0.402015      NIMAG = 0.

|    |           |           |           |
|----|-----------|-----------|-----------|
| 17 | 1.221442  | -0.838992 | -0.870202 |
| 15 | 2.907215  | -0.432591 | 0.311312  |
| 12 | -2.829924 | 1.17315   | -0.246609 |
| 35 | -1.139626 | 2.879741  | 0.215447  |
| 6  | 3.925585  | -2.03439  | 0.170876  |
| 6  | 3.66854   | 1.075237  | -0.56905  |
| 5  | 2.34107   | -0.05938  | 2.139093  |
| 1  | 1.43431   | 0.733122  | 2.060506  |
| 1  | 2.02049   | -1.120087 | 2.622869  |
| 1  | 3.334361  | 0.410685  | 2.656036  |
| 6  | -4.284683 | -0.216623 | -0.928838 |
| 6  | -4.474011 | -0.793506 | 0.33478   |
| 6  | -5.060362 | -0.758638 | -1.960507 |
| 6  | -5.353477 | -1.8353   | 0.620765  |
| 6  | -5.965772 | -1.811309 | -1.731981 |
| 1  | -4.970743 | -0.365815 | -2.972528 |
| 6  | -6.106778 | -2.345119 | -0.449326 |
| 1  | -5.466405 | -2.250911 | 1.61672   |
| 1  | -6.554418 | -2.21388  | -2.552502 |
| 1  | -6.803437 | -3.158973 | -0.268277 |
| 8  | -3.648009 | -0.173099 | 1.298307  |
| 6  | -3.652438 | -0.623977 | 2.657234  |
| 1  | -3.346598 | -1.67353  | 2.712561  |
| 1  | -2.932254 | -0.00168  | 3.187529  |

|   |           |           |           |
|---|-----------|-----------|-----------|
| 1 | -4.646442 | -0.500156 | 3.098712  |
| 6 | 2.991011  | -3.219398 | 0.507774  |
| 1 | 3.60427   | -4.125237 | 0.5728    |
| 1 | 2.484905  | -3.085324 | 1.466987  |
| 1 | 2.237153  | -3.379331 | -0.266331 |
| 6 | 4.541316  | -2.259599 | -1.220943 |
| 1 | 5.313836  | -1.524611 | -1.45887  |
| 1 | 5.016392  | -3.247389 | -1.233319 |
| 1 | 3.785395  | -2.246268 | -2.011514 |
| 6 | 5.036947  | -1.969668 | 1.246399  |
| 1 | 4.622645  | -1.854349 | 2.250794  |
| 1 | 5.592189  | -2.914096 | 1.215461  |
| 1 | 5.751775  | -1.163077 | 1.071808  |
| 6 | 2.798135  | 2.290967  | -0.177856 |
| 1 | 2.796053  | 2.465145  | 0.900216  |
| 1 | 3.216052  | 3.178821  | -0.666527 |
| 1 | 1.761601  | 2.184231  | -0.507721 |
| 6 | 5.101736  | 1.287358  | -0.03117  |
| 1 | 5.795845  | 0.517759  | -0.377977 |
| 1 | 5.466035  | 2.249436  | -0.409003 |
| 1 | 5.134747  | 1.328781  | 1.061281  |
| 6 | 3.696605  | 0.957481  | -2.105001 |
| 1 | 4.317841  | 0.133521  | -2.458687 |
| 1 | 2.694008  | 0.840823  | -2.522514 |
| 1 | 4.118227  | 1.885991  | -2.506931 |

**TS1<sub>II</sub>**

E = -4262.043062      ZPVE = 0.402482      NIMAG = 1.

|    |           |           |           |
|----|-----------|-----------|-----------|
| 17 | 0.044857  | -0.943974 | 0.101622  |
| 15 | -2.329074 | -0.05514  | -0.371031 |
| 12 | 1.364616  | 1.063685  | -0.189569 |
| 35 | 1.643723  | 3.475123  | -0.189559 |
| 6  | -3.326522 | -1.64595  | -0.75218  |
| 6  | -2.995736 | 0.878208  | 1.165243  |
| 5  | -2.238178 | 1.111901  | -1.963151 |
| 1  | -1.232867 | 1.790579  | -1.840251 |
| 1  | -2.145297 | 0.372117  | -2.922027 |
| 1  | -3.238235 | 1.803721  | -2.015206 |
| 6  | 2.055515  | -1.866068 | 0.299027  |
| 6  | 3.264251  | -1.231117 | 0.051734  |
| 6  | 2.052228  | -3.224995 | 0.585658  |
| 6  | 4.479146  | -1.920266 | 0.085694  |
| 6  | 3.256345  | -3.944929 | 0.640366  |
| 1  | 1.111182  | -3.738462 | 0.774411  |
| 6  | 4.461735  | -3.288637 | 0.387076  |
| 1  | 5.425364  | -1.429234 | -0.111636 |
| 1  | 3.248957  | -5.00608  | 0.8732    |
| 1  | 5.400659  | -3.832797 | 0.420017  |
| 8  | 3.193619  | 0.152356  | -0.230155 |
| 6  | 4.42222   | 0.874621  | -0.501658 |
| 1  | 4.88969   | 0.478313  | -1.40554  |
| 1  | 4.129455  | 1.913092  | -0.646878 |
| 1  | 5.095078  | 0.792718  | 0.354363  |
| 6  | -2.468592 | -2.487027 | -1.72614  |
| 1  | -3.048892 | -3.363829 | -2.040417 |
| 1  | -2.199771 | -1.922982 | -2.62335  |
| 1  | -1.549316 | -2.84679  | -1.256314 |
| 6  | -3.605551 | -2.493696 | 0.503064  |

|   |           |           |           |
|---|-----------|-----------|-----------|
| 1 | -4.297866 | -2.003793 | 1.192609  |
| 1 | -4.065837 | -3.443011 | 0.200083  |
| 1 | -2.685779 | -2.730192 | 1.047786  |
| 6 | -4.654279 | -1.297384 | -1.460904 |
| 1 | -4.479777 | -0.712392 | -2.367939 |
| 1 | -5.160708 | -2.228469 | -1.749566 |
| 1 | -5.336494 | -0.736111 | -0.81886  |
| 6 | -2.343628 | 2.277006  | 1.144685  |
| 1 | -2.594598 | 2.833695  | 0.238943  |
| 1 | -2.702175 | 2.848575  | 2.010183  |
| 1 | -1.253638 | 2.224676  | 1.221402  |
| 6 | -4.526936 | 1.060956  | 1.107556  |
| 1 | -5.064221 | 0.116269  | 1.222869  |
| 1 | -4.838538 | 1.716421  | 1.931803  |
| 1 | -4.843434 | 1.529808  | 0.170978  |
| 6 | -2.596909 | 0.180176  | 2.481513  |
| 1 | -3.040458 | -0.812193 | 2.584616  |
| 1 | -1.510817 | 0.076881  | 2.565403  |
| 1 | -2.9416   | 0.786856  | 3.32918   |

### INT1<sub>II</sub>

E = -4262.093608      ZPVE = 0.402915      NIMAG = 0.

|    |           |           |           |
|----|-----------|-----------|-----------|
| 17 | 2.733442  | -1.886581 | -0.683184 |
| 15 | -3.288751 | -0.380167 | -0.330708 |
| 12 | -1.54368  | 1.411202  | -0.556511 |
| 35 | -0.104035 | 3.374397  | -0.539623 |
| 6  | -2.578257 | -2.14381  | -0.591733 |
| 6  | -4.132939 | -0.16592  | 1.378796  |



|   |           |           |           |
|---|-----------|-----------|-----------|
| 5 | -4.602873 | -0.006385 | -1.776626 |
| 1 | -4.788539 | 1.198335  | -1.77729  |
| 1 | -4.064461 | -0.354092 | -2.813164 |
| 1 | -5.635216 | -0.61908  | -1.574933 |
| 6 | 4.300305  | -1.34742  | -0.08887  |
| 6 | 4.479896  | 0.006544  | 0.258149  |
| 6 | 5.337494  | -2.267692 | 0.027653  |
| 6 | 5.73855   | 0.408997  | 0.729077  |
| 6 | 6.587704  | -1.853362 | 0.49842   |
| 1 | 5.163409  | -3.301787 | -0.250018 |
| 6 | 6.780212  | -0.516348 | 0.846616  |
| 1 | 5.908388  | 1.442109  | 1.005919  |
| 1 | 7.395373  | -2.572288 | 0.588174  |
| 1 | 7.745196  | -0.180518 | 1.213728  |
| 8 | 3.41242   | 0.833468  | 0.111411  |
| 6 | 3.571122  | 2.223118  | 0.424351  |
| 1 | 4.344632  | 2.679228  | -0.202854 |
| 1 | 2.605377  | 2.679208  | 0.210071  |
| 1 | 3.822022  | 2.360576  | 1.48188   |
| 6 | -1.5917   | -2.042928 | -1.776743 |
| 1 | -1.258362 | -3.050349 | -2.056537 |
| 1 | -2.055735 | -1.589022 | -2.657291 |
| 1 | -0.695913 | -1.46841  | -1.514724 |
| 6 | -1.81265  | -2.680815 | 0.631094  |
| 1 | -2.472323 | -2.880297 | 1.479618  |
| 1 | -1.330239 | -3.630227 | 0.364783  |
| 1 | -1.026166 | -1.992972 | 0.959731  |
| 6 | -3.696909 | -3.134431 | -0.97791  |
| 1 | -4.226491 | -2.807424 | -1.876119 |
| 1 | -3.252481 | -4.117499 | -1.181838 |

|   |           |           |           |
|---|-----------|-----------|-----------|
| 1 | -4.431727 | -3.262324 | -0.179518 |
| 6 | -4.867425 | 1.191785  | 1.321244  |
| 1 | -5.64266  | 1.205547  | 0.552233  |
| 1 | -5.339174 | 1.386058  | 2.292826  |
| 1 | -4.175315 | 2.020376  | 1.124009  |
| 6 | -5.164835 | -1.276226 | 1.656473  |
| 1 | -4.689642 | -2.247473 | 1.820587  |
| 1 | -5.727067 | -1.030328 | 2.566785  |
| 1 | -5.880479 | -1.375058 | 0.835184  |
| 6 | -3.111399 | -0.098691 | 2.531436  |
| 1 | -2.527898 | -1.014915 | 2.638396  |
| 1 | -2.415594 | 0.736654  | 2.395054  |
| 1 | -3.640776 | 0.069413  | 3.478503  |

**INT2<sub>II</sub>**

E = -4262.092932    ZPVE = 0.403416    NIMAG = 0.

|    |           |           |           |
|----|-----------|-----------|-----------|
| 17 | 2.252833  | -2.890224 | -1.404456 |
| 15 | -2.678932 | -0.696666 | 0.513039  |
| 12 | 0.836768  | 1.32465   | -0.420436 |
| 35 | 1.950285  | 3.50231   | -0.445081 |
| 6  | -3.371777 | -1.228096 | -1.211092 |
| 6  | -3.832578 | 0.613193  | 1.339924  |
| 5  | -1.083244 | 0.34549   | 0.030113  |
| 1  | -0.357808 | 0.448729  | 1.024153  |
| 1  | -0.447127 | -0.275668 | -0.81795  |
| 1  | -1.296897 | 1.478935  | -0.407446 |
| 6  | 2.793971  | -2.242634 | 0.131077  |
| 6  | 2.85409   | -0.858982 | 0.333384  |

|   |           |           |           |
|---|-----------|-----------|-----------|
| 6 | 3.155999  | -3.112555 | 1.161101  |
| 6 | 3.263639  | -0.345671 | 1.563472  |
| 6 | 3.577166  | -2.59565  | 2.388468  |
| 1 | 3.102138  | -4.183244 | 0.998573  |
| 6 | 3.631784  | -1.214499 | 2.592002  |
| 1 | 3.301518  | 0.730601  | 1.699512  |
| 1 | 3.857516  | -3.27756  | 3.184626  |
| 1 | 3.95292   | -0.811466 | 3.546647  |
| 8 | 2.472371  | 0.026222  | -0.682288 |
| 6 | 3.55036   | 0.371457  | -1.610875 |
| 1 | 3.928725  | -0.542923 | -2.069311 |
| 1 | 3.112908  | 1.023424  | -2.364515 |
| 1 | 4.336912  | 0.898182  | -1.067913 |
| 6 | -5.013596 | -0.111913 | 2.021071  |
| 1 | -5.617077 | 0.610637  | 2.587957  |
| 1 | -5.675312 | -0.599851 | 1.30093   |
| 1 | -4.657731 | -0.875601 | 2.720933  |
| 6 | -2.985164 | 1.271231  | 2.451669  |
| 1 | -2.18319  | 1.890325  | 2.040066  |
| 1 | -3.625369 | 1.916411  | 3.068241  |
| 1 | -2.53153  | 0.522823  | 3.112259  |
| 6 | -4.374815 | 1.717927  | 0.416026  |
| 1 | -4.912621 | 2.469352  | 1.011847  |
| 1 | -3.57021  | 2.231838  | -0.118976 |
| 1 | -5.08109  | 1.325585  | -0.321513 |
| 6 | -4.818833 | -1.741413 | -1.07862  |
| 1 | -5.527126 | -0.931645 | -0.879891 |
| 1 | -5.128346 | -2.222027 | -2.016882 |
| 1 | -4.913539 | -2.482556 | -0.277109 |
| 6 | -2.481881 | -2.418982 | -1.636933 |

|   |           |           |           |
|---|-----------|-----------|-----------|
| 1 | -2.809888 | -2.794612 | -2.615836 |
| 1 | -1.430073 | -2.129272 | -1.727045 |
| 1 | -2.545134 | -3.244244 | -0.919543 |
| 6 | -3.310241 | -0.15787  | -2.317847 |
| 1 | -3.937652 | 0.707863  | -2.094523 |
| 1 | -2.288406 | 0.198849  | -2.47626  |
| 1 | -3.663377 | -0.586221 | -3.267058 |

**TS2<sub>II</sub>**

E = -4262.037434      ZPVE = 0.402641      NIMAG = 1.

|    |           |           |           |
|----|-----------|-----------|-----------|
| 17 | -1.586976 | 1.488446  | 2.325043  |
| 15 | -1.389438 | -0.662235 | -0.235501 |
| 12 | 2.269204  | -0.428962 | -0.31994  |
| 35 | 4.626055  | -0.959623 | -0.530429 |
| 6  | -1.696552 | -2.044705 | 1.087784  |
| 6  | -2.805144 | -0.604155 | -1.542309 |
| 5  | 0.223871  | -1.213569 | -1.22824  |
| 1  | 0.782729  | -0.193499 | -1.634574 |
| 1  | 0.926565  | -1.853809 | -0.448963 |
| 1  | 0.000951  | -1.924068 | -2.171046 |
| 6  | -0.895969 | 1.640702  | 0.421557  |
| 6  | 0.50705   | 1.803513  | 0.32023   |
| 6  | -1.666786 | 2.628069  | -0.25179  |
| 6  | 1.095241  | 2.797823  | -0.458862 |
| 6  | -1.079184 | 3.624185  | -1.02294  |
| 1  | -2.742833 | 2.618257  | -0.134782 |
| 6  | 0.313627  | 3.725218  | -1.147093 |
| 1  | 2.181005  | 2.838271  | -0.511206 |

|   |           |           |           |
|---|-----------|-----------|-----------|
| 1 | -1.725355 | 4.344271  | -1.518016 |
| 1 | 0.773723  | 4.503616  | -1.745408 |
| 8 | 1.364042  | 0.875506  | 0.969755  |
| 6 | 1.949603  | 1.341559  | 2.224198  |
| 1 | 1.14684   | 1.683075  | 2.876613  |
| 1 | 2.462212  | 0.487466  | 2.665963  |
| 1 | 2.65783   | 2.147526  | 2.019289  |
| 6 | -4.081131 | 0.056579  | -0.979453 |
| 1 | -4.83337  | 0.109083  | -1.776908 |
| 1 | -4.515351 | -0.513454 | -0.15613  |
| 1 | -3.904492 | 1.073654  | -0.628238 |
| 6 | -2.275681 | 0.237534  | -2.727469 |
| 1 | -1.425705 | -0.245242 | -3.216851 |
| 1 | -3.076878 | 0.336722  | -3.471    |
| 1 | -1.974314 | 1.242177  | -2.424548 |
| 6 | -3.175046 | -2.002029 | -2.080072 |
| 1 | -3.836824 | -1.875909 | -2.947191 |
| 1 | -2.298632 | -2.566117 | -2.410315 |
| 1 | -3.71916  | -2.597119 | -1.342723 |
| 6 | -3.082506 | -1.906273 | 1.74653   |
| 1 | -3.892241 | -2.144247 | 1.051814  |
| 1 | -3.152233 | -2.616805 | 2.580045  |
| 1 | -3.246319 | -0.902676 | 2.147505  |
| 6 | -0.610682 | -1.89753  | 2.178065  |
| 1 | -0.782951 | -2.66519  | 2.942946  |
| 1 | 0.394385  | -2.0628   | 1.77955   |
| 1 | -0.64119  | -0.92143  | 2.662525  |
| 6 | -1.555858 | -3.462628 | 0.487034  |
| 1 | -2.340674 | -3.700195 | -0.231098 |
| 1 | -0.589069 | -3.609396 | -0.001156 |

|   |           |           |          |
|---|-----------|-----------|----------|
| 1 | -1.628417 | -4.191246 | 1.305675 |
|---|-----------|-----------|----------|

**PCII**

E = -4262.132219      ZPVE = 0.407612      NIMAG = 0.

|    |           |           |           |
|----|-----------|-----------|-----------|
| 17 | 0.025169  | 4.929815  | 1.152477  |
| 15 | -1.390844 | -0.858841 | 0.327844  |
| 12 | 2.211449  | -1.064227 | 0.195877  |
| 35 | 4.609817  | -1.273907 | 0.193914  |
| 6  | -2.410912 | 0.121778  | 1.607273  |
| 6  | -2.350422 | -2.313708 | -0.508006 |
| 5  | 0.149814  | -1.698456 | 1.214301  |
| 1  | 0.714973  | -2.339253 | 0.330153  |
| 1  | 0.841601  | -0.856881 | 1.745279  |
| 1  | -0.232854 | -2.476644 | 2.036646  |
| 6  | -0.92899  | 0.348823  | -1.005491 |
| 6  | 0.318254  | 0.999096  | -1.125068 |
| 6  | -1.896532 | 0.676331  | -1.977802 |
| 6  | 0.587627  | 1.88305   | -2.171894 |
| 6  | -1.646213 | 1.570738  | -3.014606 |
| 1  | -2.879613 | 0.231442  | -1.922376 |
| 6  | -0.392246 | 2.17214   | -3.117383 |
| 1  | 1.561121  | 2.353615  | -2.239044 |
| 1  | -2.428857 | 1.794718  | -3.731536 |
| 1  | -0.174268 | 2.867345  | -3.921281 |
| 8  | 1.328462  | 0.770788  | -0.178691 |
| 6  | 2.033793  | 1.969722  | 0.318022  |
| 1  | 1.315155  | 2.783195  | 0.446114  |
| 1  | 2.460487  | 1.691944  | 1.281927  |

|   |           |           |           |
|---|-----------|-----------|-----------|
| 1 | 2.829906  | 2.239024  | -0.376682 |
| 6 | -3.84334  | -2.038071 | -0.787979 |
| 1 | -4.258734 | -2.925149 | -1.279173 |
| 1 | -4.414065 | -1.88104  | 0.129575  |
| 1 | -4.024295 | -1.194611 | -1.4553   |
| 6 | -1.628132 | -2.671089 | -1.826587 |
| 1 | -0.566417 | -2.881562 | -1.66746  |
| 1 | -2.084105 | -3.582717 | -2.228417 |
| 1 | -1.717935 | -1.891998 | -2.585659 |
| 6 | -2.273291 | -3.548792 | 0.423838  |
| 1 | -2.851723 | -4.353421 | -0.043151 |
| 1 | -1.251109 | -3.904571 | 0.557112  |
| 1 | -2.701665 | -3.364255 | 1.411128  |
| 6 | -3.53691  | 0.952517  | 0.961819  |
| 1 | -4.276873 | 0.340871  | 0.442617  |
| 1 | -4.0588   | 1.490667  | 1.760797  |
| 1 | -3.14673  | 1.700572  | 0.267939  |
| 6 | -1.43178  | 1.085551  | 2.314229  |
| 1 | -2.000852 | 1.67178   | 3.044048  |
| 1 | -0.64744  | 0.552493  | 2.85682   |
| 1 | -0.969493 | 1.798066  | 1.625458  |
| 6 | -2.999322 | -0.852705 | 2.649502  |
| 1 | -3.767492 | -1.505552 | 2.228182  |
| 1 | -2.229176 | -1.471302 | 3.118131  |
| 1 | -3.473191 | -0.259862 | 3.43969   |

**R1<sub>III</sub> + b S<sub>N</sub>2@Cl pathway, followed by S<sub>N</sub>2@C-f pathway in THF**

**RC<sub>III</sub>**

E = -4409.700337      ZPVE = 0.339551      NIMAG = 0.

|    |           |           |           |
|----|-----------|-----------|-----------|
| 17 | 0.953387  | 1.246158  | 0.230963  |
| 15 | 2.524587  | 0.203001  | -0.699487 |
| 12 | -3.016537 | -0.506832 | -0.210379 |
| 35 | -2.003938 | -2.6863   | -0.67905  |
| 5  | 2.077096  | -0.165905 | -2.54685  |
| 1  | 1.072642  | -0.836036 | -2.496926 |
| 1  | 1.937226  | 0.906164  | -3.086562 |
| 1  | 3.04319   | -0.790385 | -2.935268 |
| 6  | -3.669817 | 1.441686  | 0.324712  |
| 6  | -5.033583 | 1.147587  | 0.189996  |
| 6  | -3.371866 | 2.754286  | 0.709506  |
| 6  | -6.075607 | 2.04633   | 0.407744  |
| 6  | -4.381887 | 3.705616  | 0.943466  |
| 1  | -2.334627 | 3.062489  | 0.83359   |
| 6  | -5.723778 | 3.350239  | 0.793011  |
| 1  | -7.119324 | 1.773389  | 0.291364  |
| 1  | -4.120606 | 4.71801   | 1.240978  |
| 1  | -6.507504 | 4.081027  | 0.972248  |
| 8  | -5.222965 | -0.196619 | -0.199466 |
| 6  | -6.543439 | -0.710548 | -0.403942 |
| 1  | -7.053439 | -0.153196 | -1.196218 |
| 1  | -6.422926 | -1.751049 | -0.704628 |
| 1  | -7.123742 | -0.656922 | 0.522806  |
| 6  | 2.720354  | -1.273189 | 0.352814  |
| 6  | 1.671291  | -2.210182 | 0.373512  |
| 6  | 3.898574  | -1.530644 | 1.071331  |
| 6  | 1.795837  | -3.377504 | 1.125715  |
| 1  | 0.755329  | -2.036679 | -0.182351 |
| 6  | 4.01971   | -2.70998  | 1.811709  |
| 1  | 4.721604  | -0.82531  | 1.054052  |



|   |          |           |           |
|---|----------|-----------|-----------|
| 6 | 2.970235 | -3.631242 | 1.842876  |
| 1 | 0.977364 | -4.090438 | 1.143449  |
| 1 | 4.935257 | -2.904941 | 2.361731  |
| 1 | 3.066478 | -4.545128 | 2.421423  |
| 6 | 3.959741 | 1.288141  | -0.423485 |
| 6 | 4.236942 | 1.858278  | 0.831262  |
| 6 | 4.803219 | 1.557729  | -1.513372 |
| 6 | 5.35104  | 2.681344  | 0.991915  |
| 1 | 3.581578 | 1.671976  | 1.676193  |
| 6 | 5.921968 | 2.378162  | -1.343081 |
| 1 | 4.588728 | 1.131648  | -2.487359 |
| 6 | 6.195917 | 2.93974   | -0.093936 |
| 1 | 5.558386 | 3.121842  | 1.962225  |
| 1 | 6.571225 | 2.58202   | -2.188825 |
| 1 | 7.062156 | 3.581685  | 0.03478   |

**TS1<sub>III</sub>**

E = -4409.649319      ZPVE = 0.338393      NIMAG = 1.

|    |           |           |           |
|----|-----------|-----------|-----------|
| 17 | -0.220241 | 0.713336  | -0.000092 |
| 15 | 1.900038  | -0.447617 | -0.691013 |
| 12 | -2.059516 | -0.790611 | -0.365892 |
| 35 | -2.6162   | -3.042656 | -1.044883 |
| 5  | 1.705771  | -1.542363 | -2.312676 |
| 1  | 0.973034  | -2.454445 | -1.996114 |
| 1  | 1.209725  | -0.815132 | -3.149206 |
| 1  | 2.820437  | -1.925451 | -2.611836 |
| 6  | -2.030676 | 2.001092  | 0.57133   |
| 6  | -3.381416 | 1.695768  | 0.476618  |

|   |           |           |           |
|---|-----------|-----------|-----------|
| 6 | -1.659755 | 3.267652  | 1.003818  |
| 6 | -4.377857 | 2.616555  | 0.807698  |
| 6 | -2.634343 | 4.218429  | 1.348783  |
| 1 | -0.605901 | 3.530706  | 1.076755  |
| 6 | -3.986634 | 3.887726  | 1.249209  |
| 1 | -5.432349 | 2.375124  | 0.733095  |
| 1 | -2.336453 | 5.206336  | 1.689274  |
| 1 | -4.750111 | 4.614021  | 1.510522  |
| 8 | -3.683573 | 0.390308  | 0.023974  |
| 6 | -5.067168 | -0.012589 | -0.117706 |
| 1 | -5.566417 | 0.630292  | -0.845904 |
| 1 | -5.04325  | -1.040371 | -0.477255 |
| 1 | -5.567433 | 0.0353    | 0.851972  |
| 6 | 2.475772  | -1.395116 | 0.763451  |
| 6 | 1.719478  | -2.517707 | 1.156708  |
| 6 | 3.633565  | -1.075905 | 1.495153  |
| 6 | 2.113126  | -3.297179 | 2.244856  |
| 1 | 0.829755  | -2.79577  | 0.599379  |
| 6 | 4.024952  | -1.859412 | 2.584433  |
| 1 | 4.243218  | -0.226128 | 1.208769  |
| 6 | 3.26651   | -2.969267 | 2.966235  |
| 1 | 1.520472  | -4.16254  | 2.527051  |
| 1 | 4.92741   | -1.601185 | 3.131211  |
| 1 | 3.573069  | -3.57674  | 3.812565  |
| 6 | 2.998879  | 0.997341  | -0.882858 |
| 6 | 3.126199  | 1.966586  | 0.130879  |
| 6 | 3.670572  | 1.199377  | -2.101798 |
| 6 | 3.924172  | 3.095324  | -0.062401 |
| 1 | 2.599393  | 1.842129  | 1.072491  |
| 6 | 4.466934  | 2.332233  | -2.293213 |

|   |          |          |           |
|---|----------|----------|-----------|
| 1 | 3.573341 | 0.467678 | -2.896871 |
| 6 | 4.597696 | 3.280728 | -1.275107 |
| 1 | 4.015796 | 3.831707 | 0.730763  |
| 1 | 4.984334 | 2.471205 | -3.238068 |
| 1 | 5.216349 | 4.160649 | -1.425148 |

**INT1<sub>III</sub>**

E = -4409.707456    ZPVE = 0.341933    NIMAG = 0.

|    |           |           |           |
|----|-----------|-----------|-----------|
| 17 | -2.024041 | 1.928969  | -0.900542 |
| 15 | 1.947819  | -0.094852 | -0.941919 |
| 12 | -0.570342 | -0.52818  | -0.821251 |
| 35 | -1.841991 | -2.433972 | -1.717465 |
| 5  | 2.733918  | -0.519965 | -2.708031 |
| 1  | 2.513332  | -1.707522 | -2.856437 |
| 1  | 2.134619  | 0.1517    | -3.529738 |
| 1  | 3.924477  | -0.271243 | -2.674482 |
| 6  | -3.263598 | 1.293003  | 0.17999   |
| 6  | -2.927853 | 0.271282  | 1.077556  |
| 6  | -4.542097 | 1.839945  | 0.152032  |
| 6  | -3.894708 | -0.188932 | 1.972566  |
| 6  | -5.509435 | 1.364555  | 1.040523  |
| 1  | -4.769736 | 2.633807  | -0.55063  |
| 6  | -5.183155 | 0.35104   | 1.941976  |
| 1  | -3.661405 | -0.977843 | 2.675953  |
| 1  | -6.508668 | 1.785862  | 1.020709  |
| 1  | -5.927001 | -0.022515 | 2.637743  |
| 8  | -1.630655 | -0.222597 | 1.04102   |
| 6  | -1.167953 | -0.967517 | 2.202889  |

|   |           |           |           |
|---|-----------|-----------|-----------|
| 1 | -1.662562 | -1.939133 | 2.25598   |
| 1 | -0.09683  | -1.100867 | 2.063356  |
| 1 | -1.357416 | -0.380557 | 3.103186  |
| 6 | 2.800215  | -1.12603  | 0.337561  |
| 6 | 2.308491  | -2.411234 | 0.630119  |
| 6 | 3.984048  | -0.70555  | 0.967091  |
| 6 | 2.976707  | -3.248641 | 1.527708  |
| 1 | 1.394243  | -2.76792  | 0.160536  |
| 6 | 4.650071  | -1.541084 | 1.868606  |
| 1 | 4.389071  | 0.27943   | 0.756062  |
| 6 | 4.152717  | -2.81761  | 2.148702  |
| 1 | 2.579003  | -4.237659 | 1.737136  |
| 1 | 5.563961  | -1.196033 | 2.34424   |
| 1 | 4.672387  | -3.466821 | 2.847379  |
| 6 | 2.323624  | 1.646398  | -0.453426 |
| 6 | 1.916868  | 2.159602  | 0.792132  |
| 6 | 2.990137  | 2.501169  | -1.345705 |
| 6 | 2.180523  | 3.485499  | 1.140259  |
| 1 | 1.396429  | 1.518462  | 1.499686  |
| 6 | 3.245757  | 3.833717  | -1.001623 |
| 1 | 3.314278  | 2.121173  | -2.30876  |
| 6 | 2.844508  | 4.328947  | 0.24122   |
| 1 | 1.864198  | 3.862395  | 2.108888  |
| 1 | 3.763589  | 4.479931  | -1.704973 |
| 1 | 3.045693  | 5.362061  | 0.50941   |

**INT2m**

E = -4409.700553    ZPVE = 0.341174    NIMAG = 0.

|    |           |           |           |
|----|-----------|-----------|-----------|
| 17 | -2.204858 | 3.390353  | -0.102532 |
| 15 | 1.850355  | 0.231469  | 0.254845  |
| 12 | -1.596739 | -1.024665 | -1.115127 |
| 35 | -3.167525 | -2.819151 | -1.677668 |
| 5  | 0.770392  | -0.896548 | -0.95781  |
| 1  | 0.069019  | -1.597757 | -0.213603 |
| 1  | 0.075943  | -0.117711 | -1.633264 |
| 1  | 1.367473  | -1.61974  | -1.716664 |
| 6  | -2.669014 | 2.260621  | 1.153547  |
| 6  | -2.992452 | 0.937362  | 0.830019  |
| 6  | -2.703531 | 2.678837  | 2.484781  |
| 6  | -3.327074 | 0.029741  | 1.834593  |
| 6  | -3.055961 | 1.772168  | 3.487397  |
| 1  | -2.448119 | 3.704147  | 2.728233  |
| 6  | -3.368661 | 0.449208  | 3.165375  |
| 1  | -3.560913 | -0.994583 | 1.560111  |
| 1  | -3.081275 | 2.104759  | 4.519928  |
| 1  | -3.63706  | -0.257583 | 3.943446  |
| 8  | -2.943492 | 0.49744   | -0.499525 |
| 6  | -4.180137 | 0.747048  | -1.247677 |
| 1  | -4.426724 | 1.80651   | -1.174696 |
| 1  | -3.982856 | 0.476175  | -2.283502 |
| 1  | -4.976054 | 0.124174  | -0.83631  |
| 6  | 2.93327   | -1.024888 | 1.099144  |
| 6  | 2.951192  | -1.069961 | 2.502676  |
| 6  | 3.725372  | -1.949584 | 0.394158  |
| 6  | 3.732562  | -2.01048  | 3.185891  |
| 1  | 2.351726  | -0.359463 | 3.066396  |
| 6  | 4.512822  | -2.883537 | 1.070866  |
| 1  | 3.72697   | -1.936666 | -0.691919 |

|   |          |           |           |
|---|----------|-----------|-----------|
| 6 | 4.517496 | -2.918123 | 2.471051  |
| 1 | 3.731169 | -2.027172 | 4.272441  |
| 1 | 5.119561 | -3.587533 | 0.507458  |
| 1 | 5.128662 | -3.646116 | 2.997148  |
| 6 | 3.059274 | 1.07106   | -0.876305 |
| 6 | 4.316978 | 1.485361  | -0.394628 |
| 6 | 2.710927 | 1.434272  | -2.190256 |
| 6 | 5.194724 | 2.217907  | -1.196601 |
| 1 | 4.616534 | 1.228068  | 0.617889  |
| 6 | 3.585385 | 2.175327  | -2.992906 |
| 1 | 1.751849 | 1.132223  | -2.599425 |
| 6 | 4.832797 | 2.569894  | -2.502146 |
| 1 | 6.161595 | 2.516807  | -0.800151 |
| 1 | 3.290525 | 2.437806  | -4.005719 |
| 1 | 5.513607 | 3.141729  | -3.126152 |

**TS2<sub>III</sub>**

E = -4409.651567      ZPVE = 0.339901      NIMAG = 1.

|    |           |           |           |
|----|-----------|-----------|-----------|
| 17 | -0.619214 | -0.870209 | 2.766671  |
| 15 | -1.055183 | -0.229149 | -0.348575 |
| 12 | 2.612011  | -0.586593 | -0.631763 |
| 35 | 4.898217  | -0.709254 | -1.454158 |
| 5  | 0.421485  | -0.574057 | -1.59388  |
| 1  | 1.12758   | 0.431335  | -1.520856 |
| 1  | 1.003899  | -1.594595 | -1.238261 |
| 1  | 0.058302  | -0.707796 | -2.730456 |
| 6  | -0.23533  | 0.719027  | 1.635493  |
| 6  | 1.156118  | 0.980875  | 1.505528  |

|   |           |           |           |
|---|-----------|-----------|-----------|
| 6 | -1.034869 | 1.843191  | 1.997673  |
| 6 | 1.690468  | 2.261724  | 1.600653  |
| 6 | -0.491977 | 3.116209  | 2.113935  |
| 1 | -2.094805 | 1.691388  | 2.171984  |
| 6 | 0.874684  | 3.354576  | 1.90191   |
| 1 | 2.759885  | 2.387902  | 1.45262   |
| 1 | -1.152857 | 3.93819   | 2.376256  |
| 1 | 1.293138  | 4.351439  | 1.984365  |
| 8 | 2.042863  | -0.102495 | 1.260101  |
| 6 | 2.807898  | -0.535683 | 2.430263  |
| 1 | 2.111466  | -0.781718 | 3.230672  |
| 1 | 3.371717  | -1.419787 | 2.127177  |
| 1 | 3.489487  | 0.262701  | 2.730539  |
| 6 | -2.016727 | 1.124971  | -1.126395 |
| 6 | -1.393307 | 2.379887  | -1.267382 |
| 6 | -3.324909 | 0.966356  | -1.616178 |
| 6 | -2.057565 | 3.440568  | -1.886909 |
| 1 | -0.384131 | 2.534882  | -0.89922  |
| 6 | -3.987702 | 2.030578  | -2.233458 |
| 1 | -3.827447 | 0.009375  | -1.531979 |
| 6 | -3.357738 | 3.270784  | -2.371743 |
| 1 | -1.556737 | 4.39893   | -1.989637 |
| 1 | -4.995055 | 1.884464  | -2.61284  |
| 1 | -3.873334 | 4.095442  | -2.854997 |
| 6 | -2.167321 | -1.676064 | -0.233038 |
| 6 | -3.354017 | -1.601203 | 0.521863  |
| 6 | -1.81048  | -2.90945  | -0.80602  |
| 6 | -4.169666 | -2.721546 | 0.679212  |
| 1 | -3.641907 | -0.665909 | 0.992056  |
| 6 | -2.624325 | -4.033778 | -0.638506 |

|   |           |           |           |
|---|-----------|-----------|-----------|
| 1 | -0.900485 | -2.995982 | -1.390021 |
| 6 | -3.805162 | -3.944014 | 0.103178  |
| 1 | -5.083131 | -2.643077 | 1.261524  |
| 1 | -2.334341 | -4.97764  | -1.091008 |
| 1 | -4.437358 | -4.817562 | 0.232099  |

### PC<sub>III</sub>

E = -4409.742565      ZPVE = 0.343607      NIMAG = 0.

|    |           |           |           |
|----|-----------|-----------|-----------|
| 17 | -0.623713 | 4.932376  | 0.929409  |
| 15 | 1.05508   | -0.724713 | -0.277413 |
| 12 | -2.445478 | -1.299881 | -0.428677 |
| 35 | -4.794993 | -1.837491 | -0.606991 |
| 5  | -0.216387 | -2.024163 | -1.017043 |
| 1  | -0.804454 | -2.546403 | -0.079055 |
| 1  | -0.936767 | -1.389486 | -1.768647 |
| 1  | 0.354627  | -2.861347 | -1.652703 |
| 6  | 0.463097  | -0.010219 | 1.305142  |
| 6  | -0.831346 | 0.526464  | 1.410544  |
| 6  | 1.264234  | -0.025898 | 2.458177  |
| 6  | -1.316379 | 1.04018   | 2.609076  |
| 6  | 0.791821  | 0.491702  | 3.665051  |
| 1  | 2.26593   | -0.437043 | 2.410102  |
| 6  | -0.495421 | 1.025752  | 3.738584  |
| 1  | -2.317773 | 1.451472  | 2.661322  |
| 1  | 1.43136   | 0.480177  | 4.541206  |
| 1  | -0.868688 | 1.43148   | 4.673043  |
| 8  | -1.642534 | 0.50974   | 0.263777  |
| 6  | -2.323081 | 1.78099   | -0.064735 |



|   |           |           |           |
|---|-----------|-----------|-----------|
| 1 | -1.680247 | 2.617248  | 0.221129  |
| 1 | -2.478745 | 1.763717  | -1.142712 |
| 1 | -3.279184 | 1.823455  | 0.458694  |
| 6 | 2.666978  | -1.50465  | 0.079623  |
| 6 | 2.715068  | -2.865765 | 0.421477  |
| 6 | 3.853648  | -0.754591 | 0.035628  |
| 6 | 3.939728  | -3.467244 | 0.719621  |
| 1 | 1.806816  | -3.459098 | 0.450739  |
| 6 | 5.074791  | -1.362552 | 0.333579  |
| 1 | 3.830226  | 0.295673  | -0.236667 |
| 6 | 5.1188    | -2.71705  | 0.677393  |
| 1 | 3.971398  | -4.520619 | 0.979864  |
| 1 | 5.988558  | -0.777885 | 0.294437  |
| 1 | 6.070116  | -3.187909 | 0.905723  |
| 6 | 1.3673    | 0.638337  | -1.447498 |
| 6 | 1.422028  | 1.976709  | -1.035638 |
| 6 | 1.572618  | 0.310913  | -2.800025 |
| 6 | 1.682361  | 2.982378  | -1.971125 |
| 1 | 1.252096  | 2.250448  | 0.000406  |
| 6 | 1.84224   | 1.319426  | -3.725119 |
| 1 | 1.52531   | -0.721985 | -3.132306 |
| 6 | 1.896764  | 2.655631  | -3.311684 |
| 1 | 1.707463  | 4.016634  | -1.644211 |
| 1 | 2.001642  | 1.063178  | -4.767982 |
| 1 | 2.098428  | 3.439175  | -4.035765 |

**R1<sub>IV</sub> + b** S<sub>N</sub>2@Cl pathway, followed by S<sub>N</sub>2@C-f pathway in THF

**RC<sub>IV</sub>**

E = -4217.956479      ZPVE = 0.285149      NIMAG = 0.

|    |           |           |           |
|----|-----------|-----------|-----------|
| 17 | 1.066171  | -1.037249 | -0.62429  |
| 15 | 2.979409  | -1.880296 | -0.507748 |
| 12 | -3.600965 | 0.059291  | -0.245589 |
| 35 | -5.28473  | -1.635242 | 0.253358  |
| 6  | 3.421203  | -2.062284 | -2.269886 |
| 1  | 2.750895  | -2.793963 | -2.726397 |
| 1  | 3.352834  | -1.114988 | -2.807287 |
| 1  | 4.447916  | -2.437313 | -2.317705 |
| 5  | 2.977856  | -3.535934 | 0.486295  |
| 1  | 2.627058  | -3.292835 | 1.616435  |
| 1  | 2.224734  | -4.258887 | -0.124365 |
| 1  | 4.139766  | -3.882449 | 0.402414  |
| 6  | -2.282893 | 1.532767  | -1.020161 |
| 6  | -1.835058 | 1.944646  | 0.24201   |
| 6  | -1.727381 | 2.215902  | -2.10846  |
| 6  | -0.902798 | 2.952548  | 0.476816  |
| 6  | -0.78389  | 3.244968  | -1.933784 |
| 1  | -2.024493 | 1.955387  | -3.123538 |
| 6  | -0.375278 | 3.606608  | -0.648353 |
| 1  | -0.583331 | 3.235841  | 1.474304  |
| 1  | -0.369654 | 3.759136  | -2.797463 |
| 1  | 0.354147  | 4.399578  | -0.508028 |
| 8  | -2.4604   | 1.196105  | 1.264329  |
| 6  | -2.150173 | 1.450848  | 2.639031  |
| 1  | -2.410328 | 2.48029   | 2.905319  |
| 1  | -2.752168 | 0.755395  | 3.223228  |
| 1  | -1.087537 | 1.272021  | 2.830686  |
| 6  | 4.011756  | -0.536522 | 0.156197  |
| 6  | 4.197869  | 0.670016  | -0.540884 |
| 6  | 4.641356  | -0.72809  | 1.396563  |

|   |          |           |           |
|---|----------|-----------|-----------|
| 6 | 5.008888 | 1.668582  | -0.002633 |
| 1 | 3.706141 | 0.840915  | -1.493458 |
| 6 | 5.455847 | 0.275137  | 1.928793  |
| 1 | 4.499146 | -1.655393 | 1.941065  |
| 6 | 5.640116 | 1.47121   | 1.231148  |
| 1 | 5.147726 | 2.599156  | -0.544145 |
| 1 | 5.942776 | 0.120098  | 2.886544  |
| 1 | 6.271977 | 2.250468  | 1.64659   |

**TS1iv**

E = -4217.906520    ZPVE = 0.284970    NIMAG = 1.

|    |           |           |           |
|----|-----------|-----------|-----------|
| 17 | -0.35492  | -1.34894  | 0.586214  |
| 15 | 2.06183   | -1.460126 | 1.229059  |
| 12 | -0.725312 | 1.014497  | 0.343285  |
| 35 | 0.135764  | 3.277641  | 0.453525  |
| 6  | 2.32247   | -3.279822 | 1.340437  |
| 1  | 1.779858  | -3.643031 | 2.217114  |
| 1  | 1.948179  | -3.802552 | 0.457018  |
| 1  | 3.386858  | -3.502362 | 1.467982  |
| 5  | 2.475793  | -0.497816 | 2.885856  |
| 1  | 2.071185  | 0.639053  | 2.747701  |
| 1  | 1.861097  | -1.097711 | 3.744995  |
| 1  | 3.680578  | -0.548171 | 3.044862  |
| 6  | -2.56343  | -1.338862 | -0.018664 |
| 6  | -3.329003 | -0.233143 | -0.360587 |
| 6  | -3.145372 | -2.599078 | -0.080315 |
| 6  | -4.663915 | -0.345584 | -0.757363 |
| 6  | -4.485438 | -2.751431 | -0.472484 |

|   |           |           |           |
|---|-----------|-----------|-----------|
| 1 | -2.561633 | -3.480702 | 0.179864  |
| 6 | -5.236294 | -1.623823 | -0.808587 |
| 1 | -5.26157  | 0.519249  | -1.023113 |
| 1 | -4.934231 | -3.740149 | -0.515107 |
| 1 | -6.27315  | -1.725553 | -1.114328 |
| 8 | -2.673035 | 1.020211  | -0.282729 |
| 6 | -3.411892 | 2.22284   | -0.611212 |
| 1 | -4.263918 | 2.329038  | 0.063754  |
| 1 | -2.714529 | 3.047126  | -0.469605 |
| 1 | -3.742472 | 2.180436  | -1.651238 |
| 6 | 2.976413  | -0.893968 | -0.2426   |
| 6 | 3.108926  | -1.686823 | -1.399806 |
| 6 | 3.512241  | 0.409081  | -0.254563 |
| 6 | 3.76269   | -1.192564 | -2.530079 |
| 1 | 2.702796  | -2.693238 | -1.424901 |
| 6 | 4.156255  | 0.903846  | -1.391208 |
| 1 | 3.43167   | 1.032668  | 0.630131  |
| 6 | 4.285743  | 0.105493  | -2.531718 |
| 1 | 3.861456  | -1.8208   | -3.410752 |
| 1 | 4.564203  | 1.910397  | -1.380386 |
| 1 | 4.790744  | 0.489201  | -3.413249 |

### INT1<sub>iv</sub>

E = -4217.961121    ZPVE = 0.286690    NIMAG = 0.

|    |           |          |           |
|----|-----------|----------|-----------|
| 17 | -2.275142 | 1.952948 | -0.79121  |
| 15 | 2.040575  | 1.600535 | -0.367928 |
| 12 | -0.1086   | 0.240155 | -0.727885 |
| 35 | -0.447911 | -1.99232 | -1.714745 |

|   |           |           |           |
|---|-----------|-----------|-----------|
| 6 | 1.802973  | 2.849367  | 0.986668  |
| 1 | 1.138401  | 3.629106  | 0.603811  |
| 1 | 1.348706  | 2.42121   | 1.883816  |
| 1 | 2.760605  | 3.309854  | 1.249861  |
| 5 | 2.7844    | 2.544345  | -1.934745 |
| 1 | 2.92997   | 1.734396  | -2.831614 |
| 1 | 1.933617  | 3.371117  | -2.220898 |
| 1 | 3.834539  | 3.062728  | -1.597668 |
| 6 | -3.32157  | 0.827441  | 0.080704  |
| 6 | -2.73702  | -0.111948 | 0.939553  |
| 6 | -4.699499 | 0.909525  | -0.080423 |
| 6 | -3.563945 | -0.990515 | 1.641713  |
| 6 | -5.521164 | 0.027694  | 0.626249  |
| 1 | -5.11936  | 1.652311  | -0.749492 |
| 6 | -4.950483 | -0.916832 | 1.479774  |
| 1 | -3.140027 | -1.735946 | 2.302309  |
| 1 | -6.59733  | 0.083222  | 0.503836  |
| 1 | -5.581124 | -1.608241 | 2.028677  |
| 8 | -1.355448 | -0.113075 | 1.036263  |
| 6 | -0.75676  | -0.875925 | 2.119758  |
| 1 | -0.865527 | -1.946161 | 1.934205  |
| 1 | 0.298196  | -0.605408 | 2.133946  |
| 1 | -1.222845 | -0.590134 | 3.064022  |
| 6 | 3.265181  | 0.402192  | 0.323453  |
| 6 | 3.379653  | 0.142675  | 1.701263  |
| 6 | 4.078408  | -0.331652 | -0.559847 |
| 6 | 4.275582  | -0.818384 | 2.180201  |
| 1 | 2.773784  | 0.692946  | 2.415079  |
| 6 | 4.968595  | -1.297128 | -0.082152 |
| 1 | 4.019301  | -0.140728 | -1.62714  |

|   |          |           |          |
|---|----------|-----------|----------|
| 6 | 5.072477 | -1.544476 | 1.290315 |
| 1 | 4.350956 | -0.996008 | 3.249559 |
| 1 | 5.586584 | -1.850546 | -0.78379 |
| 1 | 5.76744  | -2.291834 | 1.661909 |

**INT2<sub>IV</sub>**

E = -4217.954376      ZPVE = 0.287933      NIMAG = 0.

|    |           |           |           |
|----|-----------|-----------|-----------|
| 17 | -1.896045 | -2.346211 | 2.341613  |
| 15 | 2.745701  | 0.600398  | 1.682816  |
| 12 | -0.98431  | 1.448459  | 0.040112  |
| 35 | -2.422196 | 3.180154  | -0.903678 |
| 6  | 3.392529  | 2.337038  | 1.920615  |
| 1  | 2.739668  | 2.83128   | 2.647074  |
| 1  | 4.404007  | 2.325527  | 2.338025  |
| 1  | 3.391288  | 2.927454  | 0.997585  |
| 5  | 1.010977  | 0.948912  | 0.839507  |
| 1  | 0.470169  | -0.094441 | 0.494038  |
| 1  | 0.28868   | 1.487741  | 1.681881  |
| 1  | 1.094039  | 1.692471  | -0.141015 |
| 6  | -2.020878 | -2.462402 | 0.598508  |
| 6  | -2.256665 | -1.31772  | -0.172167 |
| 6  | -1.874493 | -3.702292 | -0.026085 |
| 6  | -2.33065  | -1.408271 | -1.561547 |
| 6  | -1.958491 | -3.792176 | -1.417605 |
| 1  | -1.689361 | -4.584252 | 0.576997  |
| 6  | -2.188053 | -2.648478 | -2.186647 |
| 1  | -2.514947 | -0.506569 | -2.138131 |
| 1  | -1.84381  | -4.759455 | -1.895814 |

|   |           |           |           |
|---|-----------|-----------|-----------|
| 1 | -2.251308 | -2.716313 | -3.267603 |
| 8 | -2.379051 | -0.063026 | 0.432251  |
| 6 | -3.734429 | 0.260138  | 0.883107  |
| 1 | -4.053369 | -0.489717 | 1.60764   |
| 1 | -3.677962 | 1.243319  | 1.345777  |
| 1 | -4.400582 | 0.288552  | 0.019125  |
| 6 | 3.757055  | -0.022133 | 0.260397  |
| 6 | 3.392739  | -1.243174 | -0.343624 |
| 6 | 4.923886  | 0.612135  | -0.202225 |
| 6 | 4.154002  | -1.79926  | -1.372928 |
| 1 | 2.502601  | -1.766215 | -0.00227  |
| 6 | 5.692435  | 0.053148  | -1.230768 |
| 1 | 5.245557  | 1.551286  | 0.236116  |
| 6 | 5.311851  | -1.152929 | -1.823496 |
| 1 | 3.846046  | -2.740189 | -1.821561 |
| 1 | 6.589563  | 0.566381  | -1.567516 |
| 1 | 5.908042  | -1.586226 | -2.621372 |

**TS2iv**

E = -4217.909026      ZPVE = 0.285768      NIMAG = 1.

|    |           |           |           |
|----|-----------|-----------|-----------|
| 17 | 0.85564   | 2.659682  | -1.626942 |
| 15 | 1.175566  | -0.478403 | -1.071234 |
| 12 | -2.330344 | -0.66747  | -0.117844 |
| 35 | -4.604567 | -1.450242 | 0.205772  |
| 6  | 1.506745  | -0.500873 | -2.890331 |
| 1  | 0.583132  | -0.219843 | -3.402094 |
| 1  | 2.276662  | 0.224823  | -3.15942  |
| 1  | 1.809142  | -1.499823 | -3.221152 |

|   |           |           |           |
|---|-----------|-----------|-----------|
| 5 | -0.276656 | -1.74662  | -0.709461 |
| 1 | -0.640599 | -1.570731 | 0.455259  |
| 1 | -1.15667  | -1.484318 | -1.529005 |
| 1 | 0.040804  | -2.89904  | -0.832452 |
| 6 | 0.743187  | 1.605256  | 0.01425   |
| 6 | -0.553317 | 1.543452  | 0.590204  |
| 6 | 1.800582  | 1.899649  | 0.922805  |
| 6 | -0.774754 | 1.646934  | 1.959964  |
| 6 | 1.573098  | 2.016618  | 2.288614  |
| 1 | 2.80568   | 2.011398  | 0.530446  |
| 6 | 0.286003  | 1.891615  | 2.834721  |
| 1 | -1.792481 | 1.545815  | 2.330171  |
| 1 | 2.419996  | 2.223242  | 2.937671  |
| 1 | 0.113968  | 1.987603  | 3.900888  |
| 8 | -1.661586 | 1.246577  | -0.250005 |
| 6 | -2.482975 | 2.393033  | -0.633395 |
| 1 | -1.844684 | 3.135442  | -1.110743 |
| 1 | -3.228708 | 2.019551  | -1.336449 |
| 1 | -2.968397 | 2.804087  | 0.254335  |
| 6 | 2.695492  | -1.102138 | -0.280122 |
| 6 | 2.624509  | -1.660158 | 1.010971  |
| 6 | 3.960628  | -0.971769 | -0.883518 |
| 6 | 3.777912  | -2.095736 | 1.66644   |
| 1 | 1.663076  | -1.769049 | 1.503673  |
| 6 | 5.113244  | -1.410727 | -0.22702  |
| 1 | 4.05459   | -0.536777 | -1.873298 |
| 6 | 5.026986  | -1.975366 | 1.049344  |
| 1 | 3.698946  | -2.531793 | 2.658241  |
| 1 | 6.07863   | -1.310955 | -0.715026 |
| 1 | 5.923447  | -2.318317 | 1.557364  |



PC<sub>IV</sub>

E = -4218.000551      ZPVE = 0.289885      NIMAG = 0.

|    |           |           |           |
|----|-----------|-----------|-----------|
| 17 | -0.026543 | 4.862777  | -1.38651  |
| 15 | 1.254142  | -0.167078 | -0.74572  |
| 12 | -2.239139 | -0.965349 | -0.645766 |
| 35 | -4.42063  | -1.89545  | -0.148993 |
| 6  | 1.524273  | 1.273379  | -1.835858 |
| 1  | 0.601669  | 1.85299   | -1.91136  |
| 1  | 2.29936   | 1.930752  | -1.440132 |
| 1  | 1.812026  | 0.912118  | -2.826624 |
| 5  | -0.031751 | -1.419783 | -1.526596 |
| 1  | -0.512549 | -2.081429 | -0.613091 |
| 1  | -0.849174 | -0.749219 | -2.141674 |
| 1  | 0.526492  | -2.154626 | -2.290011 |
| 6  | 0.718843  | 0.470328  | 0.895219  |
| 6  | -0.595792 | 0.919     | 1.102632  |
| 6  | 1.599741  | 0.500437  | 1.988637  |
| 6  | -1.026112 | 1.385844  | 2.34143   |
| 6  | 1.18577   | 0.979517  | 3.232266  |
| 1  | 2.618596  | 0.151223  | 1.866589  |
| 6  | -0.126514 | 1.421183  | 3.408356  |
| 1  | -2.050451 | 1.714893  | 2.474312  |
| 1  | 1.887231  | 1.002486  | 4.059549  |
| 1  | -0.458149 | 1.788852  | 4.373878  |
| 8  | -1.498504 | 0.8544    | 0.026087  |
| 6  | -2.184102 | 2.114772  | -0.309198 |
| 1  | -1.439906 | 2.907341  | -0.422859 |

|   |           |           |           |
|---|-----------|-----------|-----------|
| 1 | -2.686945 | 1.938722  | -1.258593 |
| 1 | -2.917484 | 2.350029  | 0.46252   |
| 6 | 2.866104  | -0.978408 | -0.477775 |
| 6 | 2.899782  | -2.358861 | -0.218003 |
| 6 | 4.069139  | -0.254125 | -0.5197   |
| 6 | 4.118713  | -3.001167 | 0.007579  |
| 1 | 1.98066   | -2.935119 | -0.190965 |
| 6 | 5.286127  | -0.902884 | -0.297979 |
| 1 | 4.070727  | 0.811648  | -0.72054  |
| 6 | 5.312528  | -2.274762 | -0.032572 |
| 1 | 4.134464  | -4.067979 | 0.207425  |
| 1 | 6.210049  | -0.334184 | -0.333029 |
| 1 | 6.259969  | -2.776408 | 0.139089  |

**R1v + b** S<sub>N</sub>2@Cl pathway, followed by S<sub>N</sub>2@C-f pathway in THF

**RCv**

E = -4026.215350      ZPVE = 0.231775      NIMAG = 0.

|    |          |           |           |
|----|----------|-----------|-----------|
| 17 | 2.2861   | 0.520704  | -0.298995 |
| 15 | 4.003952 | -0.582915 | 0.136748  |
| 6  | 5.116532 | -0.162173 | -1.247765 |
| 1  | 4.70744  | -0.564871 | -2.17683  |
| 1  | 5.245891 | 0.918681  | -1.336019 |
| 1  | 6.085244 | -0.633161 | -1.053388 |
| 6  | 4.678376 | 0.275225  | 1.599883  |
| 1  | 5.639426 | -0.187836 | 1.844808  |
| 1  | 4.824629 | 1.339323  | 1.40243   |
| 1  | 3.997212 | 0.143208  | 2.443289  |
| 5  | 3.643211 | -2.461203 | 0.372476  |
| 1  | 2.90085  | -2.55857  | 1.322199  |

|    |           |           |           |
|----|-----------|-----------|-----------|
| 1  | 3.186935  | -2.865149 | -0.671999 |
| 1  | 4.763671  | -2.880257 | 0.598314  |
| 6  | -1.865667 | 1.860485  | 0.39273   |
| 6  | -1.376681 | 2.405811  | -1.860526 |
| 6  | -1.733548 | 3.180752  | 0.817979  |
| 6  | -1.231167 | 3.755392  | -1.489854 |
| 1  | -1.230464 | 2.139748  | -2.906639 |
| 6  | -1.408901 | 4.136557  | -0.158353 |
| 1  | -1.870864 | 3.47973   | 1.851919  |
| 1  | -0.979516 | 4.503486  | -2.237387 |
| 1  | -1.298212 | 5.177389  | 0.133178  |
| 8  | -2.184395 | 0.786627  | 1.250269  |
| 6  | -2.413606 | 1.019339  | 2.643652  |
| 1  | -3.262292 | 1.696491  | 2.784851  |
| 1  | -2.639658 | 0.048448  | 3.083906  |
| 1  | -1.519034 | 1.438974  | 3.115038  |
| 6  | -1.701423 | 1.415289  | -0.926075 |
| 12 | -2.092967 | -0.627248 | -0.485042 |
| 35 | -2.613801 | -3.002399 | -0.281144 |

**TS1v**

E = -4026.157697    ZPVE = 0.230532    NIMAG = 1.

|    |           |           |           |
|----|-----------|-----------|-----------|
| 17 | -0.427505 | -1.320374 | 0.022991  |
| 15 | -2.957465 | -1.516805 | -0.073412 |
| 12 | -0.013162 | 1.049027  | 0.010516  |
| 35 | -0.829298 | 3.329517  | 0.080086  |
| 6  | -3.107056 | -3.106708 | -0.997948 |
| 1  | -2.820012 | -2.945563 | -2.040708 |

|   |           |           |           |
|---|-----------|-----------|-----------|
| 1 | -2.458808 | -3.875739 | -0.567228 |
| 1 | -4.144573 | -3.458594 | -0.973659 |
| 6 | -3.44412  | -1.97022  | 1.649324  |
| 1 | -4.480545 | -2.326676 | 1.665324  |
| 1 | -2.791501 | -2.75253  | 2.047923  |
| 1 | -3.372485 | -1.087779 | 2.291088  |
| 5 | -4.123523 | -0.131354 | -0.830804 |
| 1 | -4.034319 | 0.847409  | -0.115371 |
| 1 | -3.730217 | 0.083153  | -1.96248  |
| 1 | -5.244482 | -0.615725 | -0.815102 |
| 6 | 1.804276  | -1.383712 | 0.059909  |
| 6 | 2.654734  | -0.29121  | -0.035569 |
| 6 | 2.3512    | -2.658931 | 0.121701  |
| 6 | 4.043969  | -0.435914 | -0.069528 |
| 6 | 3.743136  | -2.84083  | 0.095683  |
| 1 | 1.697897  | -3.527135 | 0.190376  |
| 6 | 4.580701  | -1.728377 | 0.000219  |
| 1 | 4.709948  | 0.41609   | -0.145896 |
| 1 | 4.16515   | -3.840725 | 0.146927  |
| 1 | 5.658862  | -1.853545 | -0.024104 |
| 8 | 2.030782  | 0.977119  | -0.099954 |
| 6 | 2.858025  | 2.163568  | -0.203656 |
| 1 | 3.438635  | 2.128812  | -1.127868 |
| 1 | 2.167639  | 3.005504  | -0.221918 |
| 1 | 3.513909  | 2.233884  | 0.666671  |

**INT1v**

E = -4026.208317    ZPVE = 0.231856    NIMAG = 0.

|    |           |           |           |
|----|-----------|-----------|-----------|
| 17 | -1.805613 | -2.055109 | 0.006926  |
| 15 | 3.898654  | -1.489017 | -0.005412 |
| 12 | 2.673838  | 0.710532  | -0.000432 |
| 35 | 1.668756  | 2.927353  | 0.000008  |
| 6  | 3.454166  | -2.472941 | 1.505801  |
| 1  | 3.789317  | -1.940488 | 2.400372  |
| 1  | 2.375941  | -2.642181 | 1.577491  |
| 1  | 3.965001  | -3.441233 | 1.47137   |
| 6  | 3.254309  | -2.561445 | -1.3787   |
| 1  | 3.768469  | -3.528363 | -1.357083 |
| 1  | 2.177082  | -2.729635 | -1.289814 |
| 1  | 3.459721  | -2.085774 | -2.341929 |
| 5  | 5.858772  | -1.385389 | -0.141231 |
| 1  | 6.112039  | -0.805702 | -1.184681 |
| 1  | 6.246504  | -0.751725 | 0.826861  |
| 1  | 6.279958  | -2.530993 | -0.138222 |
| 6  | -3.36533  | -1.237571 | 0.001019  |
| 6  | -3.408731 | 0.170916  | 0.00176   |
| 6  | -4.530879 | -1.997563 | -0.004482 |
| 6  | -4.665078 | 0.795091  | -0.002486 |
| 6  | -5.777039 | -1.36252  | -0.009032 |
| 1  | -4.459204 | -3.079941 | -0.005169 |
| 6  | -5.836105 | 0.031131  | -0.007807 |
| 1  | -4.733433 | 1.875886  | -0.001642 |
| 1  | -6.684867 | -1.956667 | -0.013339 |
| 1  | -6.796351 | 0.537677  | -0.011084 |
| 8  | -2.221671 | 0.831191  | 0.006405  |
| 6  | -2.233706 | 2.264716  | 0.00601   |
| 1  | -2.73192  | 2.651789  | 0.90151   |
| 1  | -1.186107 | 2.562823  | 0.007283  |

|   |          |          |           |
|---|----------|----------|-----------|
| 1 | -2.72919 | 2.651426 | -0.891151 |
|---|----------|----------|-----------|

**INT2v**

E = -4026.206620    ZPVE = 0.233416    NIMAG = 0.

|    |           |           |           |
|----|-----------|-----------|-----------|
| 17 | 1.881235  | -1.892014 | -2.044413 |
| 15 | -2.967218 | -2.35045  | 0.0734    |
| 12 | -0.727462 | 1.147316  | -0.056631 |
| 35 | -0.693813 | 3.58479   | 0.154173  |
| 6  | -4.337473 | -1.980954 | -1.149631 |
| 1  | -3.906443 | -1.876059 | -2.150709 |
| 1  | -5.052223 | -2.810526 | -1.175415 |
| 1  | -4.877384 | -1.058398 | -0.903952 |
| 6  | -3.933357 | -2.247399 | 1.675226  |
| 1  | -4.500322 | -1.312291 | 1.758352  |
| 1  | -4.629802 | -3.089632 | 1.748385  |
| 1  | -3.239569 | -2.310404 | 2.520051  |
| 5  | -2.004627 | -0.64514  | 0.083173  |
| 1  | -1.085429 | -0.681433 | 0.906189  |
| 1  | -1.503239 | -0.481188 | -1.034602 |
| 1  | -2.712735 | 0.329375  | 0.338531  |
| 6  | 2.308155  | -1.512579 | -0.388484 |
| 6  | 1.954351  | -0.278785 | 0.170063  |
| 6  | 3.00382   | -2.448246 | 0.379232  |
| 6  | 2.279689  | 0.013051  | 1.493599  |
| 6  | 3.335402  | -2.150711 | 1.703069  |
| 1  | 3.270539  | -3.403916 | -0.058189 |
| 6  | 2.980683  | -0.919504 | 2.260064  |
| 1  | 1.996454  | 0.976681  | 1.905543  |

|   |          |           |           |
|---|----------|-----------|-----------|
| 1 | 3.87471  | -2.883823 | 2.2939    |
| 1 | 3.236555 | -0.686999 | 3.288433  |
| 8 | 1.240149 | 0.665396  | -0.576435 |
| 6 | 2.075037 | 1.544117  | -1.397787 |
| 1 | 2.655689 | 0.934431  | -2.090637 |
| 1 | 1.392993 | 2.196931  | -1.938574 |
| 1 | 2.724588 | 2.131368  | -0.746234 |

**TS2<sub>v</sub>**

E = -4026.163596      ZPVE = 0.232273      NIMAG = 1.

|    |           |           |           |
|----|-----------|-----------|-----------|
| 17 | 2.416223  | -0.480757 | 2.054586  |
| 15 | 1.825486  | 1.562614  | -0.3388   |
| 12 | -1.722274 | 0.805822  | -0.02342  |
| 35 | -4.077972 | 0.2046    | -0.195934 |
| 6  | 2.60521   | 2.868756  | 0.719017  |
| 1  | 2.036693  | 2.968007  | 1.647225  |
| 1  | 3.632451  | 2.589174  | 0.968359  |
| 1  | 2.610701  | 3.834474  | 0.200645  |
| 6  | 2.845241  | 1.581695  | -1.87662  |
| 1  | 2.824601  | 2.575468  | -2.335219 |
| 1  | 3.881885  | 1.311413  | -1.653951 |
| 1  | 2.444781  | 0.856101  | -2.589422 |
| 5  | 0.040608  | 2.192218  | -0.840033 |
| 1  | -0.48458  | 1.294933  | -1.507664 |
| 1  | -0.560546 | 2.414086  | 0.21543   |
| 1  | 0.042083  | 3.197911  | -1.502547 |
| 6  | 1.822917  | -0.744815 | 0.240042  |
| 6  | 0.481493  | -1.202306 | 0.104271  |

|   |           |           |           |
|---|-----------|-----------|-----------|
| 6 | 2.784243  | -1.43275  | -0.559822 |
| 6 | 0.100423  | -2.122443 | -0.866166 |
| 6 | 2.399825  | -2.3728   | -1.50845  |
| 1 | 3.833186  | -1.184675 | -0.436557 |
| 6 | 1.05477   | -2.731513 | -1.68602  |
| 1 | -0.952982 | -2.375864 | -0.954569 |
| 1 | 3.171908  | -2.847045 | -2.108946 |
| 1 | 0.759874  | -3.466306 | -2.426736 |
| 8 | -0.525588 | -0.58518  | 0.892815  |
| 6 | -0.949845 | -1.344956 | 2.066502  |
| 1 | -0.070447 | -1.596792 | 2.657938  |
| 1 | -1.617539 | -0.695441 | 2.634395  |
| 1 | -1.477817 | -2.24548  | 1.745505  |

**PCv**

E = -4026.259080      ZPVE = 0.236797      NIMAG = 0.

|    |           |           |           |
|----|-----------|-----------|-----------|
| 17 | 3.228735  | 3.45361   | 0.434881  |
| 15 | 1.571904  | -0.912293 | -1.42907  |
| 12 | -1.708274 | 0.423464  | -1.033282 |
| 35 | -3.958345 | 0.257038  | -0.14573  |
| 6  | 2.982231  | 0.242513  | -1.520069 |
| 1  | 2.759401  | 1.184386  | -1.008119 |
| 1  | 3.858364  | -0.213861 | -1.052473 |
| 1  | 3.195444  | 0.443801  | -2.57391  |
| 6  | 2.173566  | -2.501513 | -2.105681 |
| 1  | 2.364656  | -2.347601 | -3.170679 |
| 1  | 3.100239  | -2.822766 | -1.626321 |
| 1  | 1.408917  | -3.274081 | -1.994932 |



|   |           |           |           |
|---|-----------|-----------|-----------|
| 5 | 0.032766  | -0.354947 | -2.487869 |
| 1 | -0.900685 | -1.068871 | -2.128912 |
| 1 | -0.163126 | 0.838956  | -2.318392 |
| 1 | 0.254867  | -0.567374 | -3.646487 |
| 6 | 1.190058  | -1.209955 | 0.342794  |
| 6 | 0.337653  | -0.367406 | 1.079243  |
| 6 | 1.749217  | -2.314292 | 1.009764  |
| 6 | 0.044871  | -0.615485 | 2.418792  |
| 6 | 1.477366  | -2.562787 | 2.354797  |
| 1 | 2.411691  | -2.98839  | 0.479744  |
| 6 | 0.620918  | -1.714117 | 3.057509  |
| 1 | -0.633647 | 0.035428  | 2.957744  |
| 1 | 1.928324  | -3.418692 | 2.84569   |
| 1 | 0.393841  | -1.904016 | 4.101466  |
| 8 | -0.268137 | 0.717542  | 0.42557   |
| 6 | -0.106925 | 2.038127  | 1.057239  |
| 1 | 0.957927  | 2.27132   | 1.123586  |
| 1 | -0.598778 | 2.745909  | 0.392253  |
| 1 | -0.595582 | 2.044847  | 2.031192  |

### S.11.3 Alternative gas-phase reactions in manuscript

**R1<sub>I</sub> + a S<sub>N</sub>2@P-b pathways 2 and 3**

**RC<sub>Ia-i</sub> 2**

E = -4276.931533      ZPVE = 0.431862      NIMAG = 0.

|   |          |           |           |
|---|----------|-----------|-----------|
| 6 | -0.08348 | -1.897886 | -0.027026 |
| 6 | 1.600606 | -1.264968 | 1.786515  |
| 6 | 2.453812 | -2.035271 | -0.503692 |
| 6 | 1.060596 | -2.630015 | -0.760338 |

|   |           |           |           |
|---|-----------|-----------|-----------|
| 6 | 2.720631  | -1.97033  | 1.007312  |
| 6 | -0.936313 | -1.237641 | 2.367475  |
| 6 | 3.535934  | -2.837261 | -1.235866 |
| 6 | -2.241226 | -2.046465 | 2.255149  |
| 6 | -0.553572 | -1.104075 | 3.853149  |
| 1 | -1.007149 | -2.458088 | -0.201072 |
| 1 | 1.821485  | -1.326695 | 2.855505  |
| 1 | 1.621386  | -0.193453 | 1.537944  |
| 1 | 2.475017  | -1.009332 | -0.893585 |
| 1 | 0.857613  | -2.675702 | -1.83437  |
| 1 | 1.045633  | -3.669948 | -0.39977  |
| 1 | 3.670343  | -1.455558 | 1.193522  |
| 1 | 2.833786  | -2.994735 | 1.394778  |
| 1 | -1.138198 | -0.218719 | 1.999555  |
| 1 | 3.3693    | -2.83271  | -2.318855 |
| 1 | 4.529171  | -2.414346 | -1.050233 |
| 1 | 3.548051  | -3.882466 | -0.90036  |
| 1 | -2.092229 | -3.067066 | 2.629899  |
| 1 | -3.030631 | -1.584792 | 2.857281  |
| 1 | -2.615853 | -2.113323 | 1.230771  |
| 1 | -0.235823 | -2.070126 | 4.26587   |
| 1 | -1.417381 | -0.765295 | 4.434384  |
| 1 | 0.252053  | -0.383963 | 4.01775   |
| 6 | -2.28403  | -0.109375 | -0.834585 |
| 6 | -2.977594 | 0.938702  | -0.211216 |
| 6 | -3.004461 | -1.072895 | -1.561799 |
| 6 | -4.372318 | 1.006748  | -0.289457 |
| 1 | -2.435681 | 1.698638  | 0.343188  |
| 6 | -4.393457 | -0.996053 | -1.647193 |
| 1 | -2.481356 | -1.873873 | -2.076146 |

|    |           |           |           |
|----|-----------|-----------|-----------|
| 6  | -5.080641 | 0.041799  | -1.006255 |
| 1  | -4.898057 | 1.819439  | 0.202628  |
| 1  | -4.94048  | -1.742951 | -2.215029 |
| 1  | -6.1631   | 0.098539  | -1.073092 |
| 17 | 0.088299  | -0.240118 | -2.721258 |
| 6  | 0.203963  | -1.859369 | 1.510596  |
| 1  | 0.256783  | -2.921917 | 1.801757  |
| 6  | -0.536251 | 3.305952  | 1.57512   |
| 1  | 0.083785  | 3.701889  | 2.394302  |
| 1  | -1.313264 | 2.709937  | 2.07828   |
| 6  | -1.191979 | 4.490135  | 0.830195  |
| 1  | -1.851868 | 4.15822   | 0.017076  |
| 1  | -1.80225  | 5.124434  | 1.490698  |
| 1  | -0.44144  | 5.14632   | 0.372243  |
| 15 | -0.450864 | -0.149917 | -0.690503 |
| 12 | 0.742979  | 2.081359  | 0.413391  |
| 35 | 2.980719  | 1.892049  | -0.43272  |

**TS<sub>1a-i</sub> 2**

E = -4276.881227      ZPVE = 0.431846      NIMAG = 1.

|   |           |          |           |
|---|-----------|----------|-----------|
| 6 | -0.59349  | 1.581314 | 0.860281  |
| 6 | 0.438631  | 2.800437 | -1.176039 |
| 6 | 1.941923  | 2.137961 | 0.786118  |
| 6 | 0.679146  | 2.001695 | 1.650677  |
| 6 | 1.695485  | 3.130358 | -0.356804 |
| 6 | -2.141698 | 2.495403 | -1.089415 |
| 6 | 3.166641  | 2.512807 | 1.628184  |
| 6 | -3.366191 | 2.503915 | -0.155053 |

|   |           |           |           |
|---|-----------|-----------|-----------|
| 6 | -2.302158 | 3.628693  | -2.12209  |
| 1 | -1.437106 | 1.65819   | 1.548474  |
| 1 | 0.266629  | 3.620587  | -1.878434 |
| 1 | 0.612904  | 1.909876  | -1.785271 |
| 1 | 2.169834  | 1.157495  | 0.318872  |
| 1 | 0.848969  | 1.320104  | 2.487655  |
| 1 | 0.469741  | 2.982774  | 2.100917  |
| 1 | 2.571334  | 3.173976  | -1.016151 |
| 1 | 1.587198  | 4.133122  | 0.083082  |
| 1 | -2.129175 | 1.555065  | -1.655008 |
| 1 | 3.350457  | 1.77631   | 2.417503  |
| 1 | 4.067461  | 2.576203  | 1.008859  |
| 1 | 3.016991  | 3.487493  | 2.108199  |
| 1 | -3.412094 | 3.448131  | 0.402147  |
| 1 | -4.293023 | 2.419925  | -0.732915 |
| 1 | -3.362704 | 1.689868  | 0.573786  |
| 1 | -2.20018  | 4.612764  | -1.646887 |
| 1 | -3.29797  | 3.585284  | -2.575865 |
| 1 | -1.572854 | 3.567926  | -2.93396  |
| 6 | -1.923607 | -1.364793 | 0.281746  |
| 6 | -1.937738 | -2.660843 | 0.829393  |
| 6 | -2.962859 | -0.991153 | -0.578328 |
| 6 | -2.956589 | -3.558958 | 0.510659  |
| 1 | -1.166649 | -2.960646 | 1.531501  |
| 6 | -3.992763 | -1.886127 | -0.883267 |
| 1 | -2.982991 | -0.007029 | -1.022826 |
| 6 | -3.990994 | -3.174276 | -0.346501 |
| 1 | -2.94597  | -4.55467  | 0.943928  |
| 1 | -4.793097 | -1.570776 | -1.546496 |
| 1 | -4.789375 | -3.869484 | -0.588497 |

|    |           |           |           |
|----|-----------|-----------|-----------|
| 17 | -0.972603 | -0.513288 | 3.047077  |
| 6  | -0.813809 | 2.60976   | -0.294931 |
| 1  | -0.917052 | 3.551604  | 0.273826  |
| 6  | 0.172502  | -0.581597 | -1.720589 |
| 1  | 1.054234  | -0.071088 | -2.149326 |
| 1  | -0.688479 | -0.020872 | -2.074013 |
| 6  | 0.116058  | -2.044115 | -2.202331 |
| 1  | -0.851432 | -2.49815  | -1.977318 |
| 1  | 0.291891  | -2.127415 | -3.282763 |
| 1  | 0.879238  | -2.706133 | -1.748955 |
| 15 | -0.447016 | -0.342752 | 0.723956  |
| 12 | 1.653428  | -1.105786 | -0.159967 |
| 35 | 3.876591  | -1.701334 | -0.618696 |

**PC<sub>1a-i</sub> 2**

E = -4277.012524    ZPVE = 0.434948    NIMAG = 0.

|   |           |          |           |
|---|-----------|----------|-----------|
| 6 | 0.621249  | 1.103251 | -0.947177 |
| 6 | 0.636805  | 3.308998 | 0.354862  |
| 6 | -1.553841 | 2.488213 | -0.697641 |
| 6 | -0.709694 | 1.566099 | -1.591391 |
| 6 | -0.706623 | 3.700414 | -0.283538 |
| 6 | 2.884955  | 2.035444 | 0.003181  |
| 6 | -2.856444 | 2.900173 | -1.393342 |
| 6 | 3.743031  | 1.315155 | -1.053005 |
| 6 | 3.631265  | 3.297871 | 0.474343  |
| 1 | 1.176258  | 0.559324 | -1.721102 |
| 1 | 1.211152  | 4.222206 | 0.534653  |
| 1 | 0.463832  | 2.860002 | 1.340312  |

|    |           |           |           |
|----|-----------|-----------|-----------|
| 1  | -1.83474  | 1.935001  | 0.210212  |
| 1  | -1.301513 | 0.699968  | -1.922184 |
| 1  | -0.459852 | 2.107928  | -2.515541 |
| 1  | -1.274597 | 4.332972  | 0.41003   |
| 1  | -0.51248  | 4.315832  | -1.175243 |
| 1  | 2.790176  | 1.371086  | 0.872271  |
| 1  | -3.478666 | 2.026115  | -1.612783 |
| 1  | -3.444562 | 3.570654  | -0.75737  |
| 1  | -2.653135 | 3.423368  | -2.336272 |
| 1  | 3.868875  | 1.947479  | -1.941178 |
| 1  | 4.740911  | 1.101812  | -0.655793 |
| 1  | 3.315793  | 0.36206   | -1.37305  |
| 1  | 3.67806   | 4.050065  | -0.323577 |
| 1  | 4.661358  | 3.045492  | 0.747713  |
| 1  | 3.166705  | 3.762723  | 1.348158  |
| 6  | 1.749824  | -1.428436 | 0.220954  |
| 6  | 1.84649   | -2.331264 | -0.853079 |
| 6  | 2.749048  | -1.443928 | 1.207496  |
| 6  | 2.933125  | -3.203392 | -0.952271 |
| 1  | 1.062007  | -2.374888 | -1.603979 |
| 6  | 3.828248  | -2.32504  | 1.112645  |
| 1  | 2.69865   | -0.769863 | 2.056442  |
| 6  | 3.926839  | -3.202377 | 0.029267  |
| 1  | 2.990036  | -3.892979 | -1.789088 |
| 1  | 4.591401  | -2.323944 | 1.88562   |
| 1  | 4.76691   | -3.88682  | -0.043    |
| 17 | -1.718573 | -2.943947 | -2.118501 |
| 6  | 1.461512  | 2.351495  | -0.533507 |
| 1  | 1.618651  | 2.887754  | -1.485944 |
| 6  | 0.140327  | 0.253949  | 2.039794  |

|    |           |           |           |
|----|-----------|-----------|-----------|
| 1  | -0.641761 | 1.018194  | 2.048065  |
| 1  | 1.067864  | 0.734713  | 2.365832  |
| 6  | -0.26467  | -0.888613 | 2.985805  |
| 1  | 0.450444  | -1.716305 | 2.968386  |
| 1  | -0.318647 | -0.515535 | 4.013954  |
| 1  | -1.254945 | -1.272535 | 2.725045  |
| 15 | 0.278157  | -0.319389 | 0.274788  |
| 12 | -1.953952 | -1.467182 | -0.445598 |
| 35 | -3.629202 | -0.517881 | 0.977969  |

**RC<sub>Ia-i</sub> 3**

E = -4276.931474    ZPVE = 0.431791    NIMAG = 0.

|   |           |          |           |
|---|-----------|----------|-----------|
| 6 | 0.349374  | 1.877291 | 0.180989  |
| 6 | -1.453396 | 1.230007 | 1.872776  |
| 6 | -2.138785 | 2.362439 | -0.322229 |
| 6 | -0.68041  | 2.820412 | -0.476    |
| 6 | -2.461226 | 2.147179 | 1.163587  |
| 6 | 1.043967  | 0.8268   | 2.482531  |
| 6 | -3.098838 | 3.365441 | -0.972302 |
| 6 | 2.431445  | 1.492665 | 2.513942  |
| 6 | 0.595065  | 0.529406 | 3.925119  |
| 1 | 1.335167  | 2.344568 | 0.096076  |
| 1 | -1.69978  | 1.195701 | 2.937581  |
| 1 | -1.587517 | 0.204625 | 1.500144  |
| 1 | -2.260922 | 1.40004  | -0.83575  |
| 1 | -0.437837 | 2.974725 | -1.531551 |
| 1 | -0.561415 | 3.79922  | 0.013371  |
| 1 | -3.466913 | 1.723259 | 1.265575  |

|    |           |           |           |
|----|-----------|-----------|-----------|
| 1  | -2.474771 | 3.12424   | 1.671186  |
| 1  | 1.148749  | -0.147194 | 1.977187  |
| 1  | -2.896486 | 3.471807  | -2.043973 |
| 1  | -4.138872 | 3.040384  | -0.860514 |
| 1  | -3.005959 | 4.357278  | -0.510982 |
| 1  | 2.379719  | 2.45813   | 3.032958  |
| 1  | 3.146644  | 0.864167  | 3.054684  |
| 1  | 2.844889  | 1.666482  | 1.517386  |
| 1  | 0.370832  | 1.45702   | 4.466982  |
| 1  | 1.394608  | 0.015128  | 4.468534  |
| 1  | -0.291083 | -0.109205 | 3.96649   |
| 6  | 2.367634  | -0.030846 | -0.802594 |
| 6  | 3.213404  | 0.938807  | -1.369077 |
| 6  | 2.922176  | -1.22455  | -0.316993 |
| 6  | 4.588759  | 0.722269  | -1.432074 |
| 1  | 2.7984    | 1.856115  | -1.776681 |
| 6  | 4.303823  | -1.43422  | -0.372073 |
| 1  | 2.283301  | -1.993236 | 0.106226  |
| 6  | 5.137263  | -0.463075 | -0.92779  |
| 1  | 5.233087  | 1.475726  | -1.875568 |
| 1  | 4.721034  | -2.360133 | 0.012164  |
| 1  | 6.20939   | -0.628926 | -0.977077 |
| 17 | 0.088998  | 0.600832  | -2.707775 |
| 6  | 0.01017   | 1.683894  | 1.696242  |
| 1  | 0.074726  | 2.700966  | 2.118163  |
| 6  | 0.266004  | -3.673145 | 0.649764  |
| 1  | 0.950938  | -3.331473 | 1.442097  |
| 1  | 0.921811  | -3.991912 | -0.176681 |
| 6  | -0.529766 | -4.893429 | 1.160929  |
| 1  | -1.205038 | -5.290956 | 0.393331  |



|    |           |           |           |
|----|-----------|-----------|-----------|
| 1  | 0.120971  | -5.724047 | 1.473207  |
| 1  | -1.155593 | -4.638722 | 2.025395  |
| 15 | 0.545765  | 0.195281  | -0.692722 |
| 12 | -0.918643 | -2.057898 | -0.039349 |
| 35 | -3.160794 | -1.429326 | -0.628092 |

**TS<sub>1a-i</sub> 3**

E = -4276.876899      ZPVE = 0.432104      NIMAG = 1.

|   |           |          |           |
|---|-----------|----------|-----------|
| 6 | -0.905433 | 1.321628 | 0.946343  |
| 6 | -0.480261 | 2.980532 | -0.989484 |
| 6 | 1.396084  | 2.483464 | 0.698626  |
| 6 | 0.320736  | 1.955707 | 1.659357  |
| 6 | 0.779038  | 3.498065 | -0.274637 |
| 6 | -2.869216 | 2.008149 | -0.688952 |
| 6 | 2.596981  | 3.06384  | 1.454461  |
| 6 | -3.913035 | 1.551477 | 0.346984  |
| 6 | -3.455556 | 3.179474 | -1.501453 |
| 1 | -1.64238  | 1.100082 | 1.71905   |
| 1 | -0.929188 | 3.818884 | -1.529724 |
| 1 | -0.208068 | 2.244194 | -1.749874 |
| 1 | 1.7832    | 1.634702 | 0.094777  |
| 1 | 0.742733  | 1.251693 | 2.381141  |
| 1 | -0.050859 | 2.805324 | 2.250278  |
| 1 | 1.523819  | 3.820492 | -1.0136   |
| 1 | 0.51636   | 4.394961 | 0.305735  |
| 1 | -2.691931 | 1.18892  | -1.398332 |
| 1 | 3.046496  | 2.320682 | 2.121109  |
| 1 | 3.372272  | 3.411233 | 0.763137  |

|    |           |           |           |
|----|-----------|-----------|-----------|
| 1  | 2.284805  | 3.918195  | 2.066886  |
| 1  | -4.114798 | 2.356425  | 1.06496   |
| 1  | -4.860707 | 1.306404  | -0.144665 |
| 1  | -3.603841 | 0.670706  | 0.914465  |
| 1  | -3.558598 | 4.077224  | -0.878506 |
| 1  | -4.45345  | 2.91973   | -1.870352 |
| 1  | -2.84621  | 3.439987  | -2.370961 |
| 6  | -1.540906 | -1.796872 | 0.098432  |
| 6  | -1.193416 | -3.091405 | 0.525833  |
| 6  | -2.700623 | -1.631669 | -0.667954 |
| 6  | -1.983808 | -4.188866 | 0.184042  |
| 1  | -0.326743 | -3.23628  | 1.162204  |
| 6  | -3.501347 | -2.7307   | -0.993759 |
| 1  | -2.993562 | -0.653381 | -1.02192  |
| 6  | -3.14328  | -4.012909 | -0.576175 |
| 1  | -1.698699 | -5.179159 | 0.526601  |
| 1  | -4.403396 | -2.577599 | -1.579342 |
| 1  | -3.764408 | -4.865762 | -0.833359 |
| 17 | -0.61881  | -0.997957 | 2.917712  |
| 6  | -1.519042 | 2.379441  | -0.020772 |
| 1  | -1.773973 | 3.193629  | 0.681304  |
| 6  | 0.05546   | -0.361541 | -1.83791  |
| 1  | -0.852983 | 0.187406  | -2.075162 |
| 1  | -0.129653 | -1.403205 | -2.12838  |
| 6  | 1.231673  | 0.21032   | -2.682043 |
| 1  | 2.130821  | -0.428129 | -2.699229 |
| 1  | 0.946696  | 0.306384  | -3.738038 |
| 1  | 1.555186  | 1.210345  | -2.365436 |
| 15 | -0.32396  | -0.472795 | 0.533354  |
| 12 | 1.85344   | -0.705243 | -0.410146 |

35 4.145561 -1.189222 -0.440573

**PC<sub>1a-i</sub> 3**

E = -4277.007867 ZPVE = 0.435362 NIMAG = 0.

|   |           |           |           |
|---|-----------|-----------|-----------|
| 6 | 1.111657  | -0.879254 | 0.856546  |
| 6 | 1.881445  | -2.895474 | -0.507726 |
| 6 | -0.366097 | -2.988517 | 0.753089  |
| 6 | 0.137343  | -1.817359 | 1.607216  |
| 6 | 0.83678   | -3.7741   | 0.204559  |
| 6 | 3.480168  | -0.844208 | -0.274956 |
| 6 | -1.324657 | -3.893161 | 1.537792  |
| 6 | 4.078939  | 0.136244  | 0.750358  |
| 6 | 4.611739  | -1.712495 | -0.855948 |
| 1 | 1.46527   | -0.141715 | 1.585719  |
| 1 | 2.745211  | -3.521526 | -0.749407 |
| 1 | 1.484774  | -2.545499 | -1.467449 |
| 1 | -0.927255 | -2.575539 | -0.099293 |
| 1 | -0.699031 | -1.245678 | 2.027821  |
| 1 | 0.676865  | -2.223927 | 2.475377  |
| 1 | 0.492171  | -4.562299 | -0.476928 |
| 1 | 1.322906  | -4.28819  | 1.047458  |
| 1 | 3.067141  | -0.25164  | -1.101973 |
| 1 | -2.197642 | -3.337084 | 1.896952  |
| 1 | -1.686227 | -4.718191 | 0.914016  |
| 1 | -0.824183 | -4.328814 | 2.411342  |
| 1 | 4.51345   | -0.410507 | 1.596903  |
| 1 | 4.879482  | 0.727112  | 0.293025  |
| 1 | 3.344406  | 0.842569  | 1.144139  |

|    |           |           |           |
|----|-----------|-----------|-----------|
| 1  | 5.014232  | -2.395819 | -0.097174 |
| 1  | 5.436811  | -1.077528 | -1.195865 |
| 1  | 4.287922  | -2.312465 | -1.710939 |
| 6  | 1.020757  | 1.890546  | -0.221047 |
| 6  | 0.859445  | 2.646111  | 0.9553    |
| 6  | 1.807203  | 2.418234  | -1.257724 |
| 6  | 1.4902    | 3.883788  | 1.096919  |
| 1  | 0.230781  | 2.278674  | 1.762513  |
| 6  | 2.42983   | 3.660938  | -1.115944 |
| 1  | 1.952593  | 1.86665   | -2.180173 |
| 6  | 2.276281  | 4.395958  | 0.061753  |
| 1  | 1.352742  | 4.450722  | 2.012888  |
| 1  | 3.03498   | 4.052113  | -1.928745 |
| 1  | 2.760213  | 5.362176  | 0.16912   |
| 17 | -2.192654 | 1.256388  | 2.734452  |
| 6  | 2.338229  | -1.694979 | 0.349095  |
| 1  | 2.764637  | -2.127693 | 1.271036  |
| 6  | 0.255295  | -0.178636 | -2.137507 |
| 1  | 1.287918  | -0.431867 | -2.394824 |
| 1  | 0.023822  | 0.765794  | -2.643085 |
| 6  | -0.719095 | -1.248748 | -2.650481 |
| 1  | -1.755718 | -0.977433 | -2.436942 |
| 1  | -0.612088 | -1.337513 | -3.736971 |
| 1  | -0.52611  | -2.235186 | -2.222736 |
| 15 | 0.140642  | 0.267129  | -0.325464 |
| 12 | -2.291312 | 0.632512  | 0.572691  |
| 35 | -3.928046 | 0.31758   | -1.129988 |

**R1<sub>II</sub> + a S<sub>N</sub>2@P-b pathways 2 and 3**

**RC<sub>IIa-i</sub> 2**

E = -3968.438569      ZPVE = 0.313020      NIMAG = 0.

|    |           |           |           |
|----|-----------|-----------|-----------|
| 15 | -0.896603 | -0.082657 | -0.170367 |
| 17 | -1.180826 | -0.273649 | -2.24684  |
| 6  | -2.290087 | 1.145857  | 0.280769  |
| 6  | -2.319345 | 1.271156  | 1.819485  |
| 1  | -2.984848 | 2.098999  | 2.091232  |
| 1  | -2.704804 | 0.369787  | 2.303666  |
| 1  | -1.333048 | 1.500209  | 2.238033  |
| 6  | -3.688937 | 0.794629  | -0.256387 |
| 1  | -4.362283 | 1.633605  | -0.04235  |
| 1  | -3.682379 | 0.645419  | -1.339262 |
| 1  | -4.112898 | -0.093585 | 0.212707  |
| 6  | -1.851431 | 2.499784  | -0.324847 |
| 1  | -2.58721  | 3.263807  | -0.046907 |
| 1  | -0.877212 | 2.824636  | 0.049914  |
| 1  | -1.810389 | 2.461522  | -1.417163 |
| 6  | 1.979292  | 3.944406  | -0.288223 |
| 1  | 1.11751   | 3.96003   | -0.968879 |
| 1  | 2.862315  | 3.738795  | -0.90611  |
| 1  | 2.094475  | 4.96962   | 0.094507  |
| 6  | 1.816492  | 2.901498  | 0.839502  |
| 1  | 2.694577  | 2.95635   | 1.501713  |
| 1  | 0.96624   | 3.186304  | 1.47884   |
| 12 | 1.668329  | 0.872422  | 0.255686  |
| 35 | 3.026236  | -1.089799 | -0.059402 |
| 6  | -1.185112 | -1.851088 | 0.496048  |
| 6  | -2.652173 | -2.306228 | 0.538971  |
| 1  | -2.680718 | -3.361785 | 0.835803  |
| 1  | -3.243923 | -1.747703 | 1.268923  |

|   |           |           |           |
|---|-----------|-----------|-----------|
| 1 | -3.133085 | -2.227308 | -0.440354 |
| 6 | -0.573391 | -1.85814  | 1.918571  |
| 1 | -0.692064 | -2.862351 | 2.34253   |
| 1 | 0.499528  | -1.642178 | 1.897399  |
| 1 | -1.06464  | -1.158488 | 2.600801  |
| 6 | -0.37586  | -2.824103 | -0.390461 |
| 1 | 0.666564  | -2.515622 | -0.501645 |
| 1 | -0.383675 | -3.809169 | 0.091598  |
| 1 | -0.819848 | -2.931722 | -1.382926 |

**TS<sub>IIa-i</sub> 2**

E = -3968.388369    ZPVE = 0.312768    NIMAG = 1.

|    |           |           |           |
|----|-----------|-----------|-----------|
| 15 | -0.859973 | -0.049709 | -0.150004 |
| 17 | -1.381584 | -1.252665 | -2.191037 |
| 6  | -2.249874 | 1.294314  | -0.344045 |
| 6  | -2.52236  | 2.102987  | 0.939147  |
| 1  | -3.346428 | 2.797032  | 0.732712  |
| 1  | -2.83755  | 1.466594  | 1.770302  |
| 1  | -1.670502 | 2.700121  | 1.262643  |
| 6  | -3.594227 | 0.681067  | -0.791989 |
| 1  | -4.270664 | 1.509681  | -1.035203 |
| 1  | -3.4956   | 0.048038  | -1.673011 |
| 1  | -4.064224 | 0.102296  | 0.006153  |
| 6  | -1.731317 | 2.230211  | -1.457826 |
| 1  | -2.4795   | 3.009585  | -1.647971 |
| 1  | -0.801774 | 2.735246  | -1.175274 |
| 1  | -1.566397 | 1.683811  | -2.390241 |
| 6  | 1.104506  | 2.551712  | 1.089267  |

|    |           |           |           |
|----|-----------|-----------|-----------|
| 1  | 0.338165  | 3.289686  | 0.838099  |
| 1  | 1.734342  | 2.482502  | 0.173879  |
| 1  | 1.775986  | 2.998888  | 1.832694  |
| 6  | 0.474021  | 1.228367  | 1.574729  |
| 1  | 1.227584  | 0.620303  | 2.109487  |
| 1  | -0.309258 | 1.418207  | 2.300792  |
| 12 | 1.499075  | 0.309571  | -0.189547 |
| 35 | 3.790347  | -0.169828 | -0.326194 |
| 6  | -1.255406 | -1.526049 | 1.054794  |
| 6  | -2.580032 | -2.239565 | 0.71571   |
| 1  | -2.61974  | -3.169359 | 1.296543  |
| 1  | -3.446066 | -1.63986  | 1.006961  |
| 1  | -2.663998 | -2.492705 | -0.341119 |
| 6  | -1.305346 | -1.127235 | 2.543309  |
| 1  | -1.57432  | -2.018446 | 3.123777  |
| 1  | -0.345594 | -0.771358 | 2.918799  |
| 1  | -2.063309 | -0.366423 | 2.747927  |
| 6  | -0.07926  | -2.503199 | 0.834006  |
| 1  | 0.889774  | -2.058995 | 1.102642  |
| 1  | -0.206637 | -3.376141 | 1.485839  |
| 1  | -0.033067 | -2.854294 | -0.199983 |

**PCIIa-i 2**

E = -3968.520073      ZPVE = 0.316235      NIMAG = 0.

|    |           |           |           |
|----|-----------|-----------|-----------|
| 15 | 0.817714  | -0.294375 | -0.132479 |
| 17 | -1.178197 | 3.114131  | 0.81468   |
| 6  | 2.2299    | 0.783152  | -0.848579 |
| 6  | 3.328362  | -0.048824 | -1.538873 |

|    |           |           |           |
|----|-----------|-----------|-----------|
| 1  | 4.094629  | 0.629827  | -1.933451 |
| 1  | 3.824231  | -0.738987 | -0.851562 |
| 1  | 2.942577  | -0.62669  | -2.383416 |
| 6  | 2.857186  | 1.669292  | 0.247288  |
| 1  | 3.543317  | 2.37987   | -0.229526 |
| 1  | 2.102769  | 2.253747  | 0.782568  |
| 1  | 3.439993  | 1.093202  | 0.970528  |
| 6  | 1.568194  | 1.728397  | -1.882465 |
| 1  | 2.34768   | 2.341908  | -2.351202 |
| 1  | 1.051776  | 1.192184  | -2.682218 |
| 1  | 0.859053  | 2.411423  | -1.404073 |
| 6  | 0.058214  | -1.372764 | -2.717827 |
| 1  | 0.799661  | -0.85064  | -3.327797 |
| 1  | -0.84759  | -0.76117  | -2.66647  |
| 1  | -0.205708 | -2.295986 | -3.244073 |
| 6  | 0.578611  | -1.721693 | -1.315202 |
| 1  | -0.171254 | -2.352046 | -0.830199 |
| 1  | 1.50385   | -2.305027 | -1.379246 |
| 12 | -1.428713 | 0.970116  | 0.20309   |
| 35 | -3.114837 | -0.671228 | -0.237156 |
| 6  | 1.288954  | -1.157068 | 1.516071  |
| 6  | 1.223972  | -0.123772 | 2.662876  |
| 1  | 1.42381   | -0.634296 | 3.612682  |
| 1  | 1.955685  | 0.678414  | 2.559934  |
| 1  | 0.23389   | 0.337797  | 2.746436  |
| 6  | 2.673952  | -1.830004 | 1.492873  |
| 1  | 2.823341  | -2.377338 | 2.432044  |
| 1  | 2.767463  | -2.553872 | 0.677157  |
| 1  | 3.488184  | -1.105935 | 1.406242  |
| 6  | 0.211821  | -2.23457  | 1.792643  |



|   |           |           |          |
|---|-----------|-----------|----------|
| 1 | 0.319797  | -3.10578  | 1.140973 |
| 1 | 0.323491  | -2.584004 | 2.825638 |
| 1 | -0.808167 | -1.852466 | 1.677198 |

**RC<sub>IIa-i</sub> 3**

E = -3968.436864    ZPVE = 0.313051    NIMAG = 0.

|    |           |           |           |
|----|-----------|-----------|-----------|
| 15 | -0.832619 | -0.218261 | 0.194159  |
| 17 | -1.013596 | -1.033199 | 2.120731  |
| 6  | -0.970566 | -1.731111 | -0.968171 |
| 6  | -0.095585 | -2.863658 | -0.386264 |
| 1  | -0.016579 | -3.654587 | -1.142008 |
| 1  | 0.91574   | -2.526854 | -0.145259 |
| 1  | -0.542073 | -3.298512 | 0.510988  |
| 6  | -0.345188 | -1.265337 | -2.305656 |
| 1  | -0.385039 | -2.096143 | -3.019962 |
| 1  | -0.875462 | -0.422125 | -2.75845  |
| 1  | 0.709853  | -0.99868  | -2.182522 |
| 6  | -2.395618 | -2.259818 | -1.195067 |
| 1  | -2.335925 | -3.168505 | -1.806579 |
| 1  | -2.884727 | -2.529493 | -0.254667 |
| 1  | -3.029339 | -1.548532 | -1.731275 |
| 6  | 0.782188  | 4.203029  | -0.42559  |
| 1  | 1.144207  | 5.184414  | -0.766703 |
| 1  | 0.48471   | 4.329328  | 0.62337   |
| 1  | -0.135497 | 3.997218  | -0.991797 |
| 6  | 1.834217  | 3.093693  | -0.59805  |
| 1  | 2.745941  | 3.379264  | -0.048508 |
| 1  | 2.154399  | 3.066186  | -1.652826 |

|    |           |           |           |
|----|-----------|-----------|-----------|
| 12 | 1.59831   | 1.057468  | -0.068878 |
| 35 | 3.087374  | -0.811483 | 0.23735   |
| 6  | -2.349278 | 0.939042  | 0.136966  |
| 6  | -2.008468 | 2.086353  | 1.116628  |
| 1  | -2.794936 | 2.848109  | 1.058783  |
| 1  | -1.960771 | 1.734809  | 2.151139  |
| 1  | -1.061473 | 2.573355  | 0.868469  |
| 6  | -3.690865 | 0.312404  | 0.555003  |
| 1  | -4.444065 | 1.108015  | 0.608395  |
| 1  | -4.050275 | -0.431674 | -0.156492 |
| 1  | -3.631289 | -0.152106 | 1.542765  |
| 6  | -2.441367 | 1.509224  | -1.295047 |
| 1  | -2.748345 | 0.754799  | -2.024625 |
| 1  | -3.195838 | 2.30454   | -1.308906 |
| 1  | -1.497426 | 1.954831  | -1.62737  |

**TS<sub>IIa-i</sub> 3**

E = -3968.382213      ZPVE = 0.310171      NIMAG = 1.

|    |           |           |           |
|----|-----------|-----------|-----------|
| 15 | -0.957386 | -0.217321 | 0.054816  |
| 17 | 0.345884  | 1.153322  | 2.451828  |
| 6  | -1.079156 | -2.065882 | -0.324243 |
| 6  | -0.122277 | -2.751929 | 0.687529  |
| 1  | -0.036612 | -3.811573 | 0.416332  |
| 1  | 0.883233  | -2.322714 | 0.669459  |
| 1  | -0.509928 | -2.695068 | 1.709514  |
| 6  | -0.464665 | -2.171026 | -1.752899 |
| 1  | -0.35553  | -3.236963 | -1.992301 |
| 1  | -1.108363 | -1.720983 | -2.515849 |

|    |           |           |           |
|----|-----------|-----------|-----------|
| 1  | 0.530558  | -1.719854 | -1.809898 |
| 6  | -2.441148 | -2.774377 | -0.281852 |
| 1  | -2.289579 | -3.821453 | -0.571381 |
| 1  | -2.867915 | -2.777554 | 0.724441  |
| 1  | -3.1727   | -2.350533 | -0.973635 |
| 6  | 0.543972  | 3.536466  | -1.695808 |
| 1  | 1.015291  | 4.203159  | -2.43837  |
| 1  | 0.374208  | 4.145669  | -0.799712 |
| 1  | -0.436022 | 3.265125  | -2.103592 |
| 6  | 1.402986  | 2.322348  | -1.421624 |
| 1  | 2.424736  | 2.59144   | -1.108971 |
| 1  | 1.46893   | 1.621102  | -2.257081 |
| 12 | 1.390959  | 0.937426  | 0.335779  |
| 35 | 3.094108  | -0.736175 | -0.100265 |
| 6  | -2.623969 | 0.669149  | -0.009501 |
| 6  | -2.369621 | 2.152445  | 0.337815  |
| 1  | -3.31491  | 2.699534  | 0.236969  |
| 1  | -2.008741 | 2.272196  | 1.361362  |
| 1  | -1.643472 | 2.613333  | -0.335054 |
| 6  | -3.64304  | 0.094964  | 0.999834  |
| 1  | -4.529764 | 0.741001  | 0.995002  |
| 1  | -3.969606 | -0.914264 | 0.750283  |
| 1  | -3.242739 | 0.095286  | 2.018341  |
| 6  | -3.163822 | 0.580852  | -1.460843 |
| 1  | -3.393826 | -0.440642 | -1.770985 |
| 1  | -4.093271 | 1.161746  | -1.515899 |
| 1  | -2.464034 | 1.014336  | -2.182811 |

E = -3968.519290    ZPVE = 0.315991    NIMAG = 0.

|    |           |           |           |
|----|-----------|-----------|-----------|
| 15 | 0.889696  | -0.279396 | 0.276185  |
| 17 | -1.003655 | 3.130847  | -0.925905 |
| 6  | 0.991971  | -1.744755 | -0.962806 |
| 6  | 0.522527  | -1.210652 | -2.3365   |
| 1  | 0.58867   | -2.014096 | -3.079909 |
| 1  | -0.527797 | -0.897057 | -2.302373 |
| 1  | 1.123715  | -0.374031 | -2.700656 |
| 6  | -0.011654 | -2.832867 | -0.515422 |
| 1  | -0.125396 | -3.553885 | -1.333888 |
| 1  | 0.340776  | -3.391693 | 0.356346  |
| 1  | -1.00311  | -2.425837 | -0.295769 |
| 6  | 2.386739  | -2.381529 | -1.097859 |
| 1  | 2.31114   | -3.266444 | -1.742107 |
| 1  | 3.11103   | -1.705759 | -1.559719 |
| 1  | 2.785182  | -2.712532 | -0.133483 |
| 6  | -0.212272 | -0.386247 | 2.917863  |
| 1  | -0.174372 | -0.849496 | 3.909933  |
| 1  | -1.219254 | -0.532817 | 2.515914  |
| 1  | -0.053533 | 0.688706  | 3.05687   |
| 6  | 0.855609  | -1.011257 | 2.003409  |
| 1  | 0.666635  | -2.082704 | 1.909854  |
| 1  | 1.847786  | -0.909262 | 2.452032  |
| 12 | -1.324186 | 1.014842  | -0.239345 |
| 35 | -3.131835 | -0.514439 | 0.135984  |
| 6  | 2.443286  | 0.840047  | 0.253773  |
| 6  | 2.127439  | 2.001412  | 1.227023  |
| 1  | 2.97383   | 2.698942  | 1.229684  |
| 1  | 1.241328  | 2.565558  | 0.921522  |

|   |          |           |           |
|---|----------|-----------|-----------|
| 1 | 1.992506 | 1.654811  | 2.25682   |
| 6 | 2.64064  | 1.4251    | -1.159903 |
| 1 | 3.443858 | 2.171162  | -1.125725 |
| 1 | 2.938565 | 0.662593  | -1.885467 |
| 1 | 1.741305 | 1.931404  | -1.523417 |
| 6 | 3.745336 | 0.155493  | 0.716013  |
| 1 | 4.071464 | -0.635839 | 0.040058  |
| 1 | 4.542049 | 0.908837  | 0.747265  |
| 1 | 3.667062 | -0.265228 | 1.722948  |

**R1III + a SN2@P-b pathway 2**

**R1IIIa-i 2**

E = -1264.903326      ZPVE = 0.183787      NIMAG = 0.

|    |           |           |           |
|----|-----------|-----------|-----------|
| 6  | 1.424026  | -0.01071  | -0.260044 |
| 6  | 2.642955  | 0.055435  | -0.955456 |
| 6  | 1.313778  | -0.8741   | 0.842225  |
| 6  | 3.733857  | -0.719834 | -0.553726 |
| 1  | 2.737677  | 0.715804  | -1.813828 |
| 6  | 2.402685  | -1.649625 | 1.241383  |
| 1  | 0.376651  | -0.943522 | 1.385475  |
| 6  | 3.614215  | -1.572933 | 0.545569  |
| 1  | 4.671127  | -0.658885 | -1.099109 |
| 1  | 2.306837  | -2.314727 | 2.094913  |
| 1  | 4.459515  | -2.179137 | 0.85847   |
| 17 | 0.123198  | 2.645131  | 0.539862  |
| 15 | 0.063681  | 1.068334  | -0.893082 |
| 6  | -1.442029 | 0.136959  | -0.352943 |
| 6  | -2.136988 | 0.322537  | 0.85029   |
| 6  | -1.919473 | -0.810801 | -1.27536  |

|   |           |           |           |
|---|-----------|-----------|-----------|
| 6 | -3.276748 | -0.43694  | 1.131115  |
| 1 | -1.796109 | 1.065785  | 1.563331  |
| 6 | -3.050638 | -1.576572 | -0.987751 |
| 1 | -1.408523 | -0.950694 | -2.225556 |
| 6 | -3.733163 | -1.390372 | 0.217888  |
| 1 | -3.807414 | -0.280319 | 2.066037  |
| 1 | -3.404369 | -2.307427 | -1.709201 |
| 1 | -4.619856 | -1.977375 | 0.438888  |

**RCIIIa-i 2**

E = -4116.035332      ZPVE = 0.250055      NIMAG = 0.

|    |           |           |           |
|----|-----------|-----------|-----------|
| 6  | 2.169182  | -0.15103  | -0.185394 |
| 6  | 2.646421  | -1.344509 | 0.379239  |
| 6  | 3.082558  | 0.832061  | -0.605319 |
| 6  | 4.021014  | -1.545904 | 0.536978  |
| 1  | 1.950006  | -2.116784 | 0.692876  |
| 6  | 4.451548  | 0.624641  | -0.450356 |
| 1  | 2.721981  | 1.751806  | -1.05577  |
| 6  | 4.921716  | -0.563137 | 0.123781  |
| 1  | 4.382445  | -2.469402 | 0.978871  |
| 1  | 5.152976  | 1.386092  | -0.778131 |
| 1  | 5.989595  | -0.720972 | 0.24317   |
| 17 | 0.133831  | 0.170382  | -2.474504 |
| 6  | -0.578425 | -3.512374 | 1.470984  |
| 1  | -1.342793 | -3.920093 | 2.149686  |
| 1  | 0.221626  | -3.153271 | 2.138193  |
| 6  | -0.032247 | -4.654825 | 0.586938  |
| 1  | 0.747597  | -4.310204 | -0.105836 |

|    |           |           |           |
|----|-----------|-----------|-----------|
| 1  | 0.408859  | -5.473481 | 1.175148  |
| 1  | -0.820807 | -5.101946 | -0.030908 |
| 15 | 0.360759  | 0.032749  | -0.385803 |
| 12 | -1.443973 | -1.848288 | 0.497629  |
| 35 | -3.366451 | -0.565222 | -0.136453 |
| 6  | -0.005683 | 1.739166  | 0.176899  |
| 6  | -1.057603 | 2.470512  | -0.397445 |
| 6  | 0.66548   | 2.257895  | 1.297815  |
| 6  | -1.410989 | 3.714094  | 0.126612  |
| 1  | -1.594255 | 2.073955  | -1.252047 |
| 6  | 0.29605   | 3.497218  | 1.825275  |
| 1  | 1.478478  | 1.705236  | 1.758565  |
| 6  | -0.7378   | 4.229802  | 1.237491  |
| 1  | -2.219971 | 4.275301  | -0.33097  |
| 1  | 0.824349  | 3.890903  | 2.688599  |
| 1  | -1.020462 | 5.195675  | 1.645496  |

**TS<sub>IIIa-i</sub> 2**

E = -4115.997171    ZPVE = 0.249746    NIMAG = 1.

|   |          |           |           |
|---|----------|-----------|-----------|
| 6 | 1.641104 | -1.287461 | -0.10883  |
| 6 | 1.232984 | -2.628775 | -0.071398 |
| 6 | 3.008387 | -0.988512 | -0.024868 |
| 6 | 2.170255 | -3.651953 | 0.084437  |
| 1 | 0.184833 | -2.888349 | -0.193245 |
| 6 | 3.943006 | -2.012485 | 0.139418  |
| 1 | 3.3499   | 0.036256  | -0.118262 |
| 6 | 3.527908 | -3.34528  | 0.201131  |
| 1 | 1.838623 | -4.685929 | 0.104252  |

|    |           |           |           |
|----|-----------|-----------|-----------|
| 1  | 4.999035  | -1.766801 | 0.202102  |
| 1  | 4.258259  | -4.139921 | 0.320283  |
| 17 | 1.058973  | 0.271489  | -2.673716 |
| 6  | -0.44026  | -0.247063 | 1.778944  |
| 1  | -1.105474 | 0.598539  | 2.057626  |
| 1  | 0.4765    | -0.05482  | 2.328876  |
| 6  | -1.039639 | -1.597302 | 2.228017  |
| 1  | -0.273983 | -2.376089 | 2.215452  |
| 1  | -1.465057 | -1.548628 | 3.237636  |
| 1  | -1.86735  | -1.993312 | 1.600697  |
| 15 | 0.380714  | 0.00756   | -0.415453 |
| 12 | -1.94054  | -0.305821 | 0.110949  |
| 35 | -4.25742  | -0.384377 | -0.150948 |
| 6  | 0.957594  | 1.689231  | 0.080839  |
| 6  | 0.447658  | 2.779541  | -0.64321  |
| 6  | 1.815542  | 1.936308  | 1.163512  |
| 6  | 0.77651   | 4.087387  | -0.281485 |
| 1  | -0.177569 | 2.605472  | -1.513063 |
| 6  | 2.160604  | 3.24502   | 1.509367  |
| 1  | 2.225391  | 1.115208  | 1.741579  |
| 6  | 1.636845  | 4.324002  | 0.793153  |
| 1  | 0.370675  | 4.918228  | -0.850835 |
| 1  | 2.836112  | 3.417748  | 2.342197  |
| 1  | 1.902041  | 5.340777  | 1.067299  |

**PCIIIa-i 2**

E = -4116.122079      ZPVE = 0.252905      NIMAG = 0.

|   |           |           |           |
|---|-----------|-----------|-----------|
| 6 | -1.963147 | -0.755738 | -0.346347 |
|---|-----------|-----------|-----------|



|    |           |           |           |
|----|-----------|-----------|-----------|
| 6  | -2.116216 | -1.952438 | 0.37006   |
| 6  | -3.084318 | -0.174415 | -0.964037 |
| 6  | -3.371798 | -2.563049 | 0.45861   |
| 1  | -1.26629  | -2.399201 | 0.878392  |
| 6  | -4.333288 | -0.788311 | -0.876588 |
| 1  | -2.986718 | 0.763637  | -1.503828 |
| 6  | -4.477794 | -1.986312 | -0.167044 |
| 1  | -3.479579 | -3.485928 | 1.020466  |
| 1  | -5.19378  | -0.331687 | -1.35689  |
| 1  | -5.451932 | -2.461493 | -0.09755  |
| 17 | 1.13081   | -2.304638 | 2.540617  |
| 6  | 0.058524  | 0.137886  | -2.278224 |
| 1  | 0.949968  | 0.764803  | -2.38305  |
| 1  | -0.774597 | 0.63897   | -2.783638 |
| 6  | 0.330187  | -1.242416 | -2.892839 |
| 1  | -0.525272 | -1.91575  | -2.779741 |
| 1  | 0.534964  | -1.139882 | -3.963118 |
| 1  | 1.208783  | -1.709071 | -2.436378 |
| 15 | -0.301048 | 0.021795  | -0.460315 |
| 12 | 1.727309  | -1.054891 | 0.778952  |
| 35 | 3.565637  | -0.241766 | -0.506723 |
| 6  | -0.550373 | 1.749075  | 0.125311  |
| 6  | -0.993145 | 1.934674  | 1.447636  |
| 6  | -0.259568 | 2.874971  | -0.658631 |
| 6  | -1.164178 | 3.218651  | 1.963676  |
| 1  | -1.217318 | 1.074923  | 2.07412   |
| 6  | -0.428585 | 4.161311  | -0.136317 |
| 1  | 0.097617  | 2.764446  | -1.676802 |
| 6  | -0.880555 | 4.336541  | 1.172397  |
| 1  | -1.512571 | 3.345369  | 2.98432   |

|   |           |          |           |
|---|-----------|----------|-----------|
| 1 | -0.20225  | 5.024123 | -0.755887 |
| 1 | -1.008543 | 5.336565 | 1.575715  |

**PIIIa-i 2**

E = -883.919984      ZPVE = 0.248631      NIMAG = 0.

|    |           |           |           |
|----|-----------|-----------|-----------|
| 6  | -1.330384 | -0.149029 | -0.240486 |
| 6  | -2.491825 | -0.30889  | -1.012787 |
| 6  | -1.210003 | -0.886447 | 0.949892  |
| 6  | -3.514197 | -1.171146 | -0.602329 |
| 1  | -2.593558 | 0.242179  | -1.944296 |
| 6  | -2.226491 | -1.751357 | 1.359457  |
| 1  | -0.312232 | -0.793637 | 1.554964  |
| 6  | -3.382973 | -1.894174 | 0.584897  |
| 1  | -4.406088 | -1.281087 | -1.212973 |
| 1  | -2.1157   | -2.316257 | 2.281101  |
| 1  | -4.172462 | -2.568922 | 0.903573  |
| 6  | -0.203158 | 2.403673  | 0.450414  |
| 1  | 0.657347  | 3.070268  | 0.316663  |
| 1  | -0.140899 | 1.98167   | 1.4609    |
| 6  | -1.502804 | 3.204159  | 0.28865   |
| 1  | -2.383876 | 2.570744  | 0.43295   |
| 1  | -1.549872 | 4.012075  | 1.027037  |
| 1  | -1.57256  | 3.655011  | -0.707101 |
| 15 | -0.043434 | 1.051996  | -0.841599 |
| 6  | 1.521358  | 0.194401  | -0.336149 |
| 6  | 1.893055  | -0.951522 | -1.06481  |
| 6  | 2.394465  | 0.654192  | 0.662635  |
| 6  | 3.081583  | -1.626975 | -0.789473 |

|   |          |           |           |
|---|----------|-----------|-----------|
| 1 | 1.242582 | -1.3191   | -1.854941 |
| 6 | 3.594351 | -0.014854 | 0.93144   |
| 1 | 2.150052 | 1.536973  | 1.244096  |
| 6 | 3.940544 | -1.158478 | 0.210794  |
| 1 | 3.342274 | -2.513466 | -1.360989 |
| 1 | 4.254489 | 0.360305  | 1.708852  |
| 1 | 4.870877 | -1.678021 | 0.421285  |

**R1<sub>IV</sub> + a S<sub>N</sub>2@P-b pathways 2 and 3**

**RC<sub>IVa-i</sub> 2**

E = -3924.292355      ZPVE = 0.196468      NIMAG = 0.

|    |           |           |           |
|----|-----------|-----------|-----------|
| 17 | 0.229126  | 2.168687  | 1.645378  |
| 6  | -3.519039 | 1.205192  | -0.958878 |
| 1  | -4.441366 | 0.68766   | -1.261564 |
| 1  | -3.124437 | 1.642187  | -1.890707 |
| 6  | -3.872218 | 2.342062  | 0.024524  |
| 1  | -2.985107 | 2.897293  | 0.356617  |
| 1  | -4.559991 | 3.080916  | -0.413416 |
| 1  | -4.357354 | 1.959542  | 0.931042  |
| 15 | 0.280371  | 1.084439  | -0.16488  |
| 12 | -2.141127 | -0.257985 | -0.306218 |
| 35 | -1.556942 | -2.53816  | 0.183454  |
| 6  | 0.418644  | 2.473585  | -1.368742 |
| 1  | -0.519856 | 3.033082  | -1.363835 |
| 1  | 1.24356   | 3.150336  | -1.134768 |
| 1  | 0.571635  | 2.048939  | -2.366711 |
| 6  | 1.931302  | 0.304415  | -0.16649  |
| 6  | 1.982067  | -1.096255 | -0.06668  |
| 6  | 3.126369  | 1.039035  | -0.267396 |

|   |          |           |           |
|---|----------|-----------|-----------|
| 6 | 3.216461 | -1.751741 | -0.086788 |
| 1 | 1.064266 | -1.670138 | 0.027078  |
| 6 | 4.353012 | 0.378496  | -0.283434 |
| 1 | 3.105655 | 2.123094  | -0.322018 |
| 6 | 4.398589 | -1.018395 | -0.196619 |
| 1 | 3.248103 | -2.834347 | -0.012372 |
| 1 | 5.273012 | 0.950278  | -0.360563 |
| 1 | 5.356541 | -1.530061 | -0.210243 |

**TS<sub>iv-a</sub>-i 2**

E = -3924.258603      ZPVE = 0.196349      NIMAG = 1.

|    |           |           |           |
|----|-----------|-----------|-----------|
| 17 | -1.438497 | 1.802917  | -2.215682 |
| 6  | 0.320764  | 0.333179  | 1.908119  |
| 1  | 0.645302  | -0.727735 | 1.964432  |
| 1  | -0.589492 | 0.359486  | 2.503887  |
| 6  | 1.39813   | 1.267583  | 2.495668  |
| 1  | 1.007004  | 2.280145  | 2.634205  |
| 1  | 1.786938  | 0.921483  | 3.461088  |
| 1  | 2.303525  | 1.39099   | 1.864643  |
| 15 | -0.62674  | 1.040926  | -0.146016 |
| 12 | 1.585698  | 0.140507  | 0.074656  |
| 35 | 3.656403  | -0.843958 | -0.368019 |
| 6  | -1.226643 | 2.577166  | 0.692348  |
| 1  | -0.609671 | 3.411658  | 0.351616  |
| 1  | -2.247596 | 2.764174  | 0.355494  |
| 1  | -1.190663 | 2.507149  | 1.779973  |
| 6  | -1.886837 | -0.281366 | 0.04037   |
| 6  | -1.780936 | -1.41537  | -0.778746 |

|   |           |           |           |
|---|-----------|-----------|-----------|
| 6 | -2.935381 | -0.203191 | 0.967217  |
| 6 | -2.698136 | -2.461422 | -0.660662 |
| 1 | -1.00375  | -1.470803 | -1.536915 |
| 6 | -3.860762 | -1.244053 | 1.073739  |
| 1 | -3.044413 | 0.669218  | 1.604154  |
| 6 | -3.740899 | -2.377517 | 0.265425  |
| 1 | -2.605694 | -3.332306 | -1.302651 |
| 1 | -4.674071 | -1.168075 | 1.789588  |
| 1 | -4.460152 | -3.186474 | 0.351257  |

**PC<sub>IVa-i</sub> 2**

E = -3924.379341      ZPVE = 0.199445      NIMAG = 0.

|    |           |           |           |
|----|-----------|-----------|-----------|
| 17 | 2.405967  | 1.885919  | -2.178541 |
| 6  | -0.294112 | 0.527996  | 2.346806  |
| 1  | -0.30933  | -0.566618 | 2.362136  |
| 1  | -1.187409 | 0.879379  | 2.87698   |
| 6  | 0.993215  | 1.039837  | 3.00688   |
| 1  | 1.056179  | 2.133085  | 3.003833  |
| 1  | 1.036856  | 0.711259  | 4.050113  |
| 1  | 1.877733  | 0.637235  | 2.502153  |
| 15 | -0.43848  | 1.012624  | 0.554452  |
| 12 | 1.698644  | 0.311685  | -0.757579 |
| 35 | 2.110892  | -1.849997 | 0.195216  |
| 6  | -0.872945 | 2.80434   | 0.586928  |
| 1  | -0.01376  | 3.362865  | 0.967431  |
| 1  | -1.071251 | 3.155201  | -0.428992 |
| 1  | -1.737776 | 3.009798  | 1.224773  |
| 6  | -1.939864 | 0.13063   | -0.035134 |

|   |           |           |           |
|---|-----------|-----------|-----------|
| 6 | -1.825334 | -1.241894 | -0.325175 |
| 6 | -3.177229 | 0.766224  | -0.221147 |
| 6 | -2.934296 | -1.961172 | -0.773307 |
| 1 | -0.87257  | -1.751482 | -0.200112 |
| 6 | -4.282469 | 0.042399  | -0.6771   |
| 1 | -3.291605 | 1.825647  | -0.016417 |
| 6 | -4.164566 | -1.321899 | -0.950556 |
| 1 | -2.832981 | -3.020273 | -0.990439 |
| 1 | -5.233531 | 0.547498  | -0.818404 |
| 1 | -5.024125 | -1.882664 | -1.305437 |

**PIV<sub>a-i</sub> 2**

E = -692.176347      ZPVE = 0.194948      NIMAG = 0.

|    |           |           |           |
|----|-----------|-----------|-----------|
| 6  | 2.019389  | 0.045661  | 1.061529  |
| 1  | 1.588125  | -0.539499 | 1.88238   |
| 1  | 1.740254  | 1.092799  | 1.236408  |
| 6  | 3.546728  | -0.108237 | 1.05692   |
| 1  | 4.013958  | 0.496565  | 0.27206   |
| 1  | 3.972389  | 0.214211  | 2.013767  |
| 1  | 3.841208  | -1.150611 | 0.893716  |
| 15 | 1.215933  | -0.590661 | -0.51373  |
| 6  | 1.662514  | 0.786128  | -1.695587 |
| 1  | 2.729154  | 0.721949  | -1.931838 |
| 1  | 1.106324  | 0.651643  | -2.627993 |
| 1  | 1.451322  | 1.786323  | -1.301071 |
| 6  | -0.567382 | -0.200147 | -0.161597 |
| 6  | -1.490351 | -1.257306 | -0.209564 |
| 6  | -1.044006 | 1.083566  | 0.155944  |

|   |           |           |           |
|---|-----------|-----------|-----------|
| 6 | -2.847395 | -1.043456 | 0.053726  |
| 1 | -1.140596 | -2.256167 | -0.457737 |
| 6 | -2.397973 | 1.302673  | 0.417951  |
| 1 | -0.358298 | 1.925549  | 0.200529  |
| 6 | -3.303965 | 0.238029  | 0.367811  |
| 1 | -3.544235 | -1.875919 | 0.010665  |
| 1 | -2.746589 | 2.302814  | 0.661112  |
| 1 | -4.357371 | 0.408789  | 0.571146  |

### RC<sub>va-i</sub> 3

E = -3924.291804    ZPVE = 0.196384    NIMAG = 0.

|    |           |           |           |
|----|-----------|-----------|-----------|
| 17 | 0.179534  | -2.043301 | 1.504836  |
| 6  | -1.028469 | 3.036667  | 0.792327  |
| 1  | -1.837497 | 3.521927  | 1.358337  |
| 1  | -0.211027 | 2.91805   | 1.521415  |
| 6  | -0.572658 | 3.983528  | -0.339558 |
| 1  | -0.211605 | 4.952641  | 0.03597   |
| 1  | 0.242475  | 3.55705   | -0.940527 |
| 1  | -1.390228 | 4.202886  | -1.037535 |
| 15 | 0.327837  | -0.726852 | -0.128729 |
| 12 | -1.698401 | 1.112015  | 0.236873  |
| 35 | -3.403515 | -0.499617 | -0.267483 |
| 6  | 2.10195   | -0.280203 | -0.1487   |
| 6  | 3.133306  | -1.217619 | -0.331111 |
| 6  | 2.42642   | 1.073275  | 0.03858   |
| 6  | 4.464015  | -0.803237 | -0.336558 |
| 1  | 2.902045  | -2.271394 | -0.454028 |
| 6  | 3.76229   | 1.484711  | 0.033781  |

|   |           |           |           |
|---|-----------|-----------|-----------|
| 1 | 1.640178  | 1.805998  | 0.195054  |
| 6 | 4.779814  | 0.548933  | -0.157111 |
| 1 | 5.255707  | -1.533189 | -0.476817 |
| 1 | 4.002922  | 2.53328   | 0.180016  |
| 1 | 5.817966  | 0.867692  | -0.160126 |
| 6 | 0.120916  | -1.897212 | -1.533261 |
| 1 | -0.905912 | -2.269922 | -1.516093 |
| 1 | 0.281324  | -1.343373 | -2.464677 |
| 1 | 0.822323  | -2.733365 | -1.483153 |

**TS<sub>IVa-i</sub> 3**

E = -3924.246100    ZPVE = 0.193728    NIMAG = 1.

|    |           |           |           |
|----|-----------|-----------|-----------|
| 17 | 0.354043  | 0.649776  | -2.479858 |
| 6  | 1.251634  | 2.565413  | 0.850181  |
| 1  | 1.812752  | 3.280865  | 0.229279  |
| 1  | 0.189668  | 2.829195  | 0.824482  |
| 6  | 1.81931   | 2.423396  | 2.251303  |
| 1  | 1.86574   | 3.395171  | 2.773204  |
| 1  | 1.208579  | 1.759227  | 2.872691  |
| 1  | 2.837155  | 2.017555  | 2.247721  |
| 15 | -0.540362 | -0.683724 | 0.18372   |
| 12 | 1.579747  | 0.819132  | -0.478413 |
| 35 | 3.212164  | -0.883844 | 0.107093  |
| 6  | -2.294081 | -0.362663 | 0.20295   |
| 6  | -3.288065 | -1.315327 | 0.539223  |
| 6  | -2.701717 | 0.948586  | -0.158953 |
| 6  | -4.632479 | -0.96466  | 0.522555  |
| 1  | -3.005829 | -2.325818 | 0.813426  |



|   |           |           |           |
|---|-----------|-----------|-----------|
| 6 | -4.048842 | 1.290544  | -0.173889 |
| 1 | -1.952796 | 1.680104  | -0.446016 |
| 6 | -5.015046 | 0.336637  | 0.167196  |
| 1 | -5.386896 | -1.700389 | 0.783575  |
| 1 | -4.348965 | 2.294456  | -0.45654  |
| 1 | -6.067457 | 0.604085  | 0.153428  |
| 6 | -0.351707 | -2.443525 | 0.677465  |
| 1 | 0.721674  | -2.648724 | 0.670321  |
| 1 | -0.747312 | -2.624049 | 1.684526  |
| 1 | -0.856352 | -3.11747  | -0.023813 |

**PCIVa-i 3**

E = -3924.377571      ZPVE = 0.199470      NIMAG = 0.

|    |           |           |           |
|----|-----------|-----------|-----------|
| 17 | 1.055798  | 2.946794  | 0.616647  |
| 6  | -0.849988 | -0.64747  | 2.501407  |
| 1  | -1.292877 | 0.336562  | 2.688061  |
| 1  | -1.630126 | -1.395395 | 2.687012  |
| 6  | 0.361394  | -0.865216 | 3.418037  |
| 1  | 0.050696  | -0.826321 | 4.466926  |
| 1  | 0.835834  | -1.837936 | 3.252811  |
| 1  | 1.118318  | -0.087191 | 3.272206  |
| 15 | -0.426895 | -0.688281 | 0.687587  |
| 12 | 1.526494  | 0.860597  | -0.064309 |
| 35 | 3.092589  | -0.541797 | -1.179727 |
| 6  | -2.010438 | -0.276231 | -0.147577 |
| 6  | -2.832483 | -1.240279 | -0.751843 |
| 6  | -2.392862 | 1.076842  | -0.196579 |
| 6  | -4.022692 | -0.860832 | -1.378149 |

|   |           |           |           |
|---|-----------|-----------|-----------|
| 1 | -2.554104 | -2.289054 | -0.742016 |
| 6 | -3.584988 | 1.450434  | -0.819308 |
| 1 | -1.754108 | 1.84264   | 0.237401  |
| 6 | -4.402715 | 0.482819  | -1.409857 |
| 1 | -4.649118 | -1.616445 | -1.843062 |
| 1 | -3.867545 | 2.498398  | -0.850632 |
| 1 | -5.326753 | 0.775631  | -1.89954  |
| 6 | -0.099526 | -2.464392 | 0.32601   |
| 1 | 0.841054  | -2.750295 | 0.80344   |
| 1 | -0.898933 | -3.116852 | 0.690082  |
| 1 | 0.029752  | -2.603321 | -0.750211 |

**R1<sub>v</sub> + a S<sub>N</sub>2@P-b pathway 2**

**RC<sub>v<sub>a</sub>-i</sub> 2**

E = -3732.547898      ZPVE = 0.142552      NIMAG = 0.

|    |           |           |           |
|----|-----------|-----------|-----------|
| 17 | -2.071213 | -1.16036  | -1.363667 |
| 6  | 1.107738  | 2.884042  | -0.748098 |
| 1  | 2.087636  | 3.140065  | -1.176128 |
| 1  | 0.389123  | 3.041678  | -1.567775 |
| 6  | 0.78356   | 3.859132  | 0.404453  |
| 1  | 0.759003  | 4.909348  | 0.077235  |
| 1  | -0.19589  | 3.654078  | 0.85892   |
| 1  | 1.524336  | 3.799007  | 1.211846  |
| 15 | -1.481978 | -0.035093 | 0.302277  |
| 12 | 1.082209  | 0.829448  | -0.268291 |
| 35 | 2.03003   | -1.345635 | 0.109856  |
| 6  | -1.681163 | -1.252164 | 1.667374  |
| 1  | -0.91868  | -2.027091 | 1.561506  |
| 1  | -1.518404 | -0.731885 | 2.618265  |

|   |           |           |           |
|---|-----------|-----------|-----------|
| 1 | -2.678529 | -1.700436 | 1.663735  |
| 6 | -2.940199 | 1.073025  | 0.520452  |
| 1 | -3.004266 | 1.761805  | -0.325304 |
| 1 | -3.871203 | 0.505333  | 0.601892  |
| 1 | -2.790038 | 1.660228  | 1.433456  |

**TS<sub>Va-i</sub> 2**

E = -3732.496341      ZPVE = 0.140276      NIMAG = 1.

|    |           |           |           |
|----|-----------|-----------|-----------|
| 17 | -0.988259 | -1.796428 | -1.34932  |
| 6  | -0.217227 | 2.076134  | -1.104189 |
| 1  | 0.257456  | 1.965478  | -2.095984 |
| 1  | -1.269824 | 2.305366  | -1.279083 |
| 6  | 0.490295  | 3.114625  | -0.241246 |
| 1  | 0.504008  | 4.10476   | -0.725381 |
| 1  | -0.00374  | 3.241318  | 0.728843  |
| 1  | 1.531917  | 2.844269  | -0.036778 |
| 15 | -1.810535 | -0.09672  | 0.616364  |
| 12 | 0.472328  | 0.002714  | -0.602718 |
| 35 | 2.577514  | -0.421692 | 0.438499  |
| 6  | -2.650329 | -0.287775 | 2.258222  |
| 1  | -1.970063 | -0.754531 | 2.973611  |
| 1  | -2.920042 | 0.710355  | 2.633938  |
| 1  | -3.571312 | -0.875442 | 2.180958  |
| 6  | -3.258096 | 0.384947  | -0.409023 |
| 1  | -2.954271 | 0.53304   | -1.444538 |
| 1  | -4.022523 | -0.398111 | -0.364894 |
| 1  | -3.691951 | 1.312628  | -0.015135 |

**PC<sub>Va-i</sub> 2**

E = -3732.633204    ZPVE = 0.145534    NIMAG = 0.

|    |           |           |           |
|----|-----------|-----------|-----------|
| 17 | -0.581638 | 3.103744  | -0.422203 |
| 6  | 2.314409  | -0.994954 | -1.155652 |
| 1  | 2.504617  | -0.237295 | -1.925541 |
| 1  | 3.290522  | -1.402849 | -0.862977 |
| 6  | 1.406462  | -2.100834 | -1.71278  |
| 1  | 1.873651  | -2.561865 | -2.588793 |
| 1  | 1.230151  | -2.891503 | -0.977274 |
| 1  | 0.429627  | -1.712413 | -2.016489 |
| 15 | 1.612662  | -0.083102 | 0.305294  |
| 12 | -0.778198 | 0.90118   | -0.066566 |
| 35 | -2.258183 | -0.954463 | 0.17858   |
| 6  | 1.681638  | -1.305513 | 1.688746  |
| 1  | 0.911056  | -2.066551 | 1.543356  |
| 1  | 2.665031  | -1.783498 | 1.749168  |
| 1  | 1.477516  | -0.796489 | 2.635406  |
| 6  | 2.943514  | 1.128865  | 0.713112  |
| 1  | 3.004084  | 1.879814  | -0.079119 |
| 1  | 2.695826  | 1.646878  | 1.643742  |
| 1  | 3.914486  | 0.635341  | 0.8245    |

**R1<sub>1</sub> + a S<sub>N2</sub>@P-f pathway 2****RC<sub>Ia-r</sub> 2**

E = -4276.924487    ZPVE = 0.431080    NIMAG = 0.

|   |           |           |          |
|---|-----------|-----------|----------|
| 6 | -1.384204 | -1.313654 | 0.602018 |
|---|-----------|-----------|----------|

|   |           |           |           |
|---|-----------|-----------|-----------|
| 6 | -0.820768 | -2.773668 | -1.40601  |
| 6 | -3.205988 | -1.866608 | -1.149047 |
| 6 | -2.882795 | -1.606454 | 0.332934  |
| 6 | -2.315439 | -2.999206 | -1.682586 |
| 6 | 0.989505  | -2.428563 | 0.42746   |
| 6 | -4.696374 | -2.165623 | -1.348996 |
| 6 | 1.237602  | -2.447502 | 1.945853  |
| 6 | 1.819303  | -3.553384 | -0.217824 |
| 1 | -1.250168 | -1.196708 | 1.682659  |
| 1 | -0.268653 | -3.655327 | -1.741934 |
| 1 | -0.452534 | -1.93286  | -2.011009 |
| 1 | -2.970027 | -0.954168 | -1.721299 |
| 1 | -3.512442 | -0.800962 | 0.722268  |
| 1 | -3.141902 | -2.506996 | 0.909515  |
| 1 | -2.479464 | -3.128193 | -2.76     |
| 1 | -2.629226 | -3.940868 | -1.206678 |
| 1 | 1.385615  | -1.48461  | 0.031069  |
| 1 | -5.320831 | -1.333825 | -1.004075 |
| 1 | -4.926192 | -2.343304 | -2.405496 |
| 1 | -4.992493 | -3.061319 | -0.788563 |
| 1 | 0.918075  | -3.408053 | 2.370726  |
| 1 | 2.304079  | -2.322401 | 2.153842  |
| 1 | 0.711017  | -1.65114  | 2.477663  |
| 1 | 1.430889  | -4.542486 | 0.058586  |
| 1 | 2.853824  | -3.487757 | 0.132698  |
| 1 | 1.842801  | -3.489285 | -1.309239 |
| 6 | -2.214822 | 1.488115  | 0.351745  |
| 6 | -2.818372 | 2.270161  | -0.645882 |
| 6 | -2.638169 | 1.63473   | 1.684603  |
| 6 | -3.843171 | 3.165864  | -0.323185 |

|    |           |           |           |
|----|-----------|-----------|-----------|
| 1  | -2.482115 | 2.185253  | -1.675885 |
| 6  | -3.65237  | 2.534605  | 2.006218  |
| 1  | -2.167938 | 1.055333  | 2.4739    |
| 6  | -4.260202 | 3.298275  | 1.001659  |
| 1  | -4.302722 | 3.763949  | -1.104327 |
| 1  | -3.968426 | 2.644418  | 3.039497  |
| 1  | -5.049792 | 3.999112  | 1.256342  |
| 17 | 0.664707  | 0.997611  | 1.192107  |
| 6  | -0.523924 | -2.514272 | 0.087444  |
| 1  | -0.911429 | -3.387326 | 0.640067  |
| 6  | 2.107646  | 2.884876  | -1.817565 |
| 1  | 1.406263  | 2.432291  | -2.535482 |
| 1  | 1.495766  | 3.591831  | -1.235656 |
| 6  | 3.199819  | 3.656783  | -2.585489 |
| 1  | 2.783253  | 4.431523  | -3.24695  |
| 1  | 3.898086  | 4.162905  | -1.907128 |
| 1  | 3.802542  | 2.991978  | -3.216691 |
| 15 | -0.891969 | 0.337349  | -0.207811 |
| 12 | 2.722228  | 1.379074  | -0.478349 |
| 35 | 4.309236  | -0.136753 | 0.4838    |

**TS<sub>1a-r</sub> 2**

E = -4276.892192      ZPVE = 0.429743      NIMAG = 1.

|   |           |           |           |
|---|-----------|-----------|-----------|
| 6 | -1.220966 | -1.294795 | 0.677986  |
| 6 | -0.766195 | -3.010446 | -1.142786 |
| 6 | -3.155005 | -2.138595 | -0.817598 |
| 6 | -2.730871 | -1.654223 | 0.580183  |
| 6 | -2.267622 | -3.313572 | -1.256931 |

|   |           |           |           |
|---|-----------|-----------|-----------|
| 6 | 1.160083  | -2.35322  | 0.486582  |
| 6 | -4.644563 | -2.497884 | -0.85502  |
| 6 | 1.520811  | -2.295144 | 1.980454  |
| 6 | 2.022846  | -3.431277 | -0.191318 |
| 1 | -0.996953 | -1.012427 | 1.711316  |
| 1 | -0.205717 | -3.911604 | -1.405509 |
| 1 | -0.481778 | -2.249659 | -1.884998 |
| 1 | -2.99154  | -1.311502 | -1.529733 |
| 1 | -3.353632 | -0.810293 | 0.890088  |
| 1 | -2.916055 | -2.460877 | 1.305034  |
| 1 | -2.513543 | -3.602935 | -2.286481 |
| 1 | -2.505444 | -4.183114 | -0.625084 |
| 1 | 1.455487  | -1.398152 | 0.023306  |
| 1 | -5.270298 | -1.640119 | -0.583706 |
| 1 | -4.946144 | -2.831484 | -1.854162 |
| 1 | -4.867463 | -3.310206 | -0.151803 |
| 1 | 1.33938   | -3.27221  | 2.446898  |
| 1 | 2.580987  | -2.054211 | 2.102872  |
| 1 | 0.953469  | -1.540669 | 2.530556  |
| 1 | 1.745565  | -4.435183 | 0.155976  |
| 1 | 3.074025  | -3.265704 | 0.062352  |
| 1 | 1.944574  | -3.411855 | -1.281736 |
| 6 | -2.00359  | 1.456246  | 0.015063  |
| 6 | -2.38824  | 2.322963  | -1.035754 |
| 6 | -2.570736 | 1.652798  | 1.295409  |
| 6 | -3.332754 | 3.327498  | -0.821548 |
| 1 | -1.956117 | 2.193185  | -2.023327 |
| 6 | -3.497705 | 2.665657  | 1.506897  |
| 1 | -2.2475   | 1.03842   | 2.128021  |
| 6 | -3.886299 | 3.500713  | 0.448441  |

|    |           |           |           |
|----|-----------|-----------|-----------|
| 1  | -3.627008 | 3.976148  | -1.640846 |
| 1  | -3.912545 | 2.818087  | 2.498672  |
| 1  | -4.612386 | 4.289723  | 0.62118   |
| 17 | 0.8344    | 1.301763  | 2.078163  |
| 6  | -0.366272 | -2.540945 | 0.273064  |
| 1  | -0.680813 | -3.33731  | 0.968072  |
| 6  | 1.225998  | 2.35426   | -1.630741 |
| 1  | 0.989885  | 1.598545  | -2.384136 |
| 1  | 0.32594   | 2.872679  | -1.292128 |
| 6  | 2.355578  | 3.291766  | -2.034688 |
| 1  | 2.086883  | 3.854664  | -2.946024 |
| 1  | 2.571744  | 4.041336  | -1.26353  |
| 1  | 3.284427  | 2.755504  | -2.25624  |
| 15 | -0.806395 | 0.181221  | -0.424787 |
| 12 | 2.060709  | 1.22979   | 0.12135   |
| 35 | 4.176806  | 0.135562  | -0.208978 |

**PC<sub>Ia-r</sub> 2**

E = -4276.985640    ZPVE = 0.434214    NIMAG = 0.

|   |           |          |           |
|---|-----------|----------|-----------|
| 6 | 1.217004  | 0.979888 | 0.56711   |
| 6 | 1.434214  | 3.23465  | -0.602364 |
| 6 | 3.55785   | 1.950919 | 0.039708  |
| 6 | 2.692665  | 1.133483 | 1.014354  |
| 6 | 2.913902  | 3.325427 | -0.196707 |
| 6 | -0.926252 | 2.455765 | 0.116895  |
| 6 | 4.999899  | 2.076693 | 0.545986  |
| 6 | -1.732618 | 1.782754 | 1.244501  |
| 6 | -1.46548  | 3.887432 | -0.063605 |



|    |           |           |           |
|----|-----------|-----------|-----------|
| 1  | 0.696839  | 0.448001  | 1.373469  |
| 1  | 1.032766  | 4.249372  | -0.675563 |
| 1  | 1.348547  | 2.789368  | -1.602506 |
| 1  | 3.584588  | 1.421011  | -0.924193 |
| 1  | 3.1436    | 0.151307  | 1.184007  |
| 1  | 2.691736  | 1.643315  | 1.990056  |
| 1  | 3.474236  | 3.876441  | -0.962864 |
| 1  | 2.994943  | 3.914606  | 0.729918  |
| 1  | -1.124321 | 1.926024  | -0.824443 |
| 1  | 5.463693  | 1.092509  | 0.676461  |
| 1  | 5.617611  | 2.648709  | -0.155747 |
| 1  | 5.031832  | 2.592383  | 1.514206  |
| 1  | -1.685206 | 2.367191  | 2.170736  |
| 1  | -2.796891 | 1.722856  | 0.97326   |
| 1  | -1.334026 | 0.79768   | 1.528182  |
| 1  | -1.193524 | 4.521482  | 0.789756  |
| 1  | -2.558339 | 3.875307  | -0.134542 |
| 1  | -1.086869 | 4.360981  | -0.972216 |
| 6  | 2.137549  | -1.576556 | -0.515715 |
| 6  | 3.190253  | -1.945533 | -1.367923 |
| 6  | 1.911988  | -2.345442 | 0.64038   |
| 6  | 4.000659  | -3.047639 | -1.0749   |
| 1  | 3.373331  | -1.367758 | -2.270133 |
| 6  | 2.716817  | -3.447607 | 0.933774  |
| 1  | 1.107783  | -2.091324 | 1.326466  |
| 6  | 3.764868  | -3.80065  | 0.076653  |
| 1  | 4.80995   | -3.316967 | -1.747639 |
| 1  | 2.524698  | -4.030548 | 1.830054  |
| 1  | 4.389814  | -4.658973 | 0.305747  |
| 17 | -2.323883 | -1.81958  | 2.590983  |

|    |           |           |           |
|----|-----------|-----------|-----------|
| 6  | 0.60091   | 2.40918   | 0.402433  |
| 1  | 0.733334  | 2.887561  | 1.388702  |
| 6  | -0.603123 | -0.908099 | -0.840584 |
| 1  | -0.689789 | -1.338076 | 0.173313  |
| 1  | -1.323093 | -0.091459 | -0.991343 |
| 6  | -0.858005 | -1.991158 | -1.900893 |
| 1  | -1.885963 | -2.365766 | -1.845459 |
| 1  | -0.711955 | -1.584235 | -2.906082 |
| 1  | -0.177172 | -2.836244 | -1.770621 |
| 15 | 1.105649  | -0.111249 | -1.007087 |
| 12 | -2.825014 | -0.73555  | 0.712237  |
| 35 | -4.455695 | -0.206217 | -0.907796 |

**R1<sub>II</sub> + a S<sub>N</sub>2@P-f pathway 2**

**RC<sub>IIa-r</sub> 2**

E = -3968.427810    ZPVE = 0.311814    NIMAG = 0.

|    |           |           |           |
|----|-----------|-----------|-----------|
| 15 | -2.066321 | -0.537941 | -0.78856  |
| 17 | -0.088338 | 0.09044   | -1.46222  |
| 6  | -1.566256 | -1.691188 | 0.65787   |
| 6  | -1.081575 | -2.985447 | -0.037724 |
| 1  | -0.842508 | -3.735621 | 0.725859  |
| 1  | -1.848757 | -3.40633  | -0.69566  |
| 1  | -0.175385 | -2.814798 | -0.626059 |
| 6  | -2.861122 | -2.000308 | 1.443049  |
| 1  | -2.675919 | -2.857959 | 2.10059   |
| 1  | -3.171212 | -1.163747 | 2.075011  |
| 1  | -3.695945 | -2.271    | 0.786231  |
| 6  | -0.470694 | -1.210165 | 1.62396   |
| 1  | -0.364544 | -1.942189 | 2.43434   |

|    |           |           |           |
|----|-----------|-----------|-----------|
| 1  | 0.504377  | -1.172401 | 1.127934  |
| 1  | -0.689826 | -0.243523 | 2.080541  |
| 6  | 3.050562  | 3.591455  | 0.895642  |
| 1  | 3.634514  | 3.643862  | -0.031763 |
| 1  | 3.706529  | 3.147658  | 1.654648  |
| 1  | 2.859018  | 4.628863  | 1.208196  |
| 6  | 1.750337  | 2.779516  | 0.713855  |
| 1  | 1.181019  | 2.792648  | 1.655934  |
| 1  | 1.101791  | 3.283796  | -0.018809 |
| 12 | 2.002147  | 0.782808  | 0.082418  |
| 35 | 3.307546  | -1.198451 | -0.216571 |
| 6  | -2.792283 | 1.125068  | -0.1775   |
| 6  | -4.295221 | 0.838446  | 0.068619  |
| 1  | -4.469433 | 0.194455  | 0.933447  |
| 1  | -4.804518 | 1.790221  | 0.261964  |
| 1  | -4.773692 | 0.380801  | -0.804053 |
| 6  | -2.687167 | 2.098087  | -1.374657 |
| 1  | -3.281444 | 2.993256  | -1.155748 |
| 1  | -1.65769  | 2.414908  | -1.555605 |
| 1  | -3.077409 | 1.656809  | -2.298518 |
| 6  | -2.164204 | 1.77078   | 1.065424  |
| 1  | -2.318786 | 1.171039  | 1.966525  |
| 1  | -1.092585 | 1.949062  | 0.940047  |
| 1  | -2.635179 | 2.74643   | 1.240844  |

**TS<sub>IIa-r</sub> 2**

E = -3968.376027      ZPVE = 0.310731      NIMAG = 1.

|    |          |          |          |
|----|----------|----------|----------|
| 15 | 1.626147 | 0.343327 | -0.76502 |
|----|----------|----------|----------|

|    |           |           |           |
|----|-----------|-----------|-----------|
| 17 | -0.437356 | -1.427831 | -2.244944 |
| 6  | 1.118738  | 1.885283  | 0.222429  |
| 6  | 0.100139  | 2.622881  | -0.679646 |
| 1  | -0.048109 | 3.637736  | -0.291328 |
| 1  | 0.446521  | 2.706445  | -1.715064 |
| 1  | -0.879456 | 2.135412  | -0.681172 |
| 6  | 2.446906  | 2.703689  | 0.242262  |
| 1  | 2.193373  | 3.728079  | 0.542816  |
| 1  | 3.166714  | 2.310607  | 0.963862  |
| 1  | 2.928664  | 2.772856  | -0.740238 |
| 6  | 0.550798  | 1.771452  | 1.644486  |
| 1  | 0.370858  | 2.78267   | 2.030027  |
| 1  | -0.408198 | 1.248591  | 1.648369  |
| 1  | 1.22642   | 1.266025  | 2.335272  |
| 6  | -1.951264 | -2.466851 | 1.990551  |
| 1  | -2.203753 | -3.255746 | 1.269174  |
| 1  | -2.824651 | -1.813843 | 2.093608  |
| 1  | -1.8127   | -2.974516 | 2.959844  |
| 6  | -0.681581 | -1.696665 | 1.597765  |
| 1  | -0.427381 | -0.935697 | 2.337817  |
| 1  | 0.166882  | -2.365221 | 1.443375  |
| 12 | -1.478161 | -0.841477 | -0.279801 |
| 35 | -3.346366 | 0.651623  | -0.027226 |
| 6  | 2.873423  | -0.744331 | 0.157198  |
| 6  | 4.242058  | -0.244707 | -0.402047 |
| 1  | 4.505777  | 0.754874  | -0.0482   |
| 1  | 5.016375  | -0.937576 | -0.048608 |
| 1  | 4.273538  | -0.247733 | -1.496475 |
| 6  | 2.658553  | -2.185355 | -0.368199 |
| 1  | 3.486878  | -2.812435 | -0.016574 |

|   |          |           |           |
|---|----------|-----------|-----------|
| 1 | 1.723029 | -2.615244 | -0.007196 |
| 1 | 2.640399 | -2.22533  | -1.461144 |
| 6 | 2.904598 | -0.731847 | 1.691816  |
| 1 | 3.178055 | 0.248423  | 2.091381  |
| 1 | 1.947714 | -1.029384 | 2.123     |
| 1 | 3.662422 | -1.446171 | 2.037625  |

**PCIIa-r 2**

E = -3968.519922    ZPVE = 0.316041    NIMAG = 0.

|    |           |           |           |
|----|-----------|-----------|-----------|
| 15 | -0.929944 | -0.23425  | 0.284686  |
| 17 | 1.030842  | 3.25546   | -0.516097 |
| 6  | -0.9432   | -1.736673 | -0.909697 |
| 6  | -0.381306 | -1.264809 | -2.269939 |
| 1  | -0.37762  | -2.106858 | -2.972584 |
| 1  | -0.974013 | -0.464197 | -2.72021  |
| 1  | 0.65656   | -0.924625 | -2.177785 |
| 6  | -2.326571 | -2.381049 | -1.110268 |
| 1  | -2.208173 | -3.289736 | -1.71341  |
| 1  | -2.787904 | -2.677757 | -0.16286  |
| 1  | -3.0198   | -1.725814 | -1.64355  |
| 6  | 0.019791  | -2.801786 | -0.336301 |
| 1  | 0.126386  | -3.604839 | -1.075656 |
| 1  | 1.018614  | -2.401556 | -0.143218 |
| 1  | -0.36335  | -3.25625  | 0.582142  |
| 6  | 0.277244  | -1.056312 | 2.758738  |
| 1  | 0.749432  | -0.0746   | 2.87343   |
| 1  | 0.992572  | -1.703791 | 2.247411  |
| 1  | 0.111532  | -1.458191 | 3.764431  |

|    |           |           |           |
|----|-----------|-----------|-----------|
| 6  | -1.061486 | -0.948827 | 2.011863  |
| 1  | -1.556716 | -1.924191 | 1.958613  |
| 1  | -1.733804 | -0.293826 | 2.572943  |
| 12 | 1.320157  | 1.062567  | -0.116859 |
| 35 | 3.153297  | -0.469843 | 0.005433  |
| 6  | -2.488007 | 0.868006  | 0.130485  |
| 6  | -2.620055 | 1.382733  | -1.317382 |
| 1  | -2.85968  | 0.582835  | -2.023672 |
| 1  | -3.438015 | 2.111844  | -1.362364 |
| 1  | -1.712231 | 1.89338   | -1.653817 |
| 6  | -2.240811 | 2.082521  | 1.057851  |
| 1  | -3.106576 | 2.752913  | 0.994548  |
| 1  | -2.137011 | 1.794202  | 2.109339  |
| 1  | -1.3577   | 2.654794  | 0.762041  |
| 6  | -3.796907 | 0.176189  | 0.563413  |
| 1  | -4.081083 | -0.64498  | -0.095794 |
| 1  | -3.747937 | -0.208228 | 1.586813  |
| 1  | -4.608081 | 0.914134  | 0.536133  |

**R1III + a S<sub>N</sub>2@P-f pathways 2 and 3**

**RCIIIa-r 2**

E = -4116.032137      ZPVE = 0.249792      NIMAG = 0.

|   |          |           |           |
|---|----------|-----------|-----------|
| 6 | 2.790806 | -0.234253 | -0.614892 |
| 6 | 4.052581 | -0.114421 | -1.221526 |
| 6 | 2.700624 | -0.739139 | 0.694762  |
| 6 | 5.210614 | -0.463817 | -0.520146 |
| 1 | 4.129865 | 0.251419  | -2.242187 |
| 6 | 3.856475 | -1.093593 | 1.387712  |
| 1 | 1.733873 | -0.85477  | 1.173918  |

|    |           |           |           |
|----|-----------|-----------|-----------|
| 6  | 5.111979  | -0.953957 | 0.78302   |
| 1  | 6.181529  | -0.362412 | -0.995526 |
| 1  | 3.778187  | -1.483555 | 2.398173  |
| 1  | 6.009271  | -1.233966 | 1.327179  |
| 17 | 0.038579  | -1.450954 | -1.392521 |
| 6  | -0.78053  | -1.095722 | 2.438826  |
| 1  | -0.146926 | -1.991793 | 2.336571  |
| 1  | -0.081533 | -0.268618 | 2.638108  |
| 6  | -1.716378 | -1.275316 | 3.653278  |
| 1  | -1.169081 | -1.466996 | 4.5887    |
| 1  | -2.335448 | -0.385803 | 3.825511  |
| 1  | -2.408855 | -2.114838 | 3.514374  |
| 15 | 1.36025   | 0.275521  | -1.643967 |
| 12 | -1.729599 | -0.778439 | 0.578876  |
| 35 | -3.73976  | -0.726937 | -0.729993 |
| 6  | 0.444148  | 1.448415  | -0.547021 |
| 6  | -0.906808 | 1.722138  | -0.845851 |
| 6  | 1.074682  | 2.180393  | 0.472858  |
| 6  | -1.622102 | 2.66473   | -0.10253  |
| 1  | -1.41288  | 1.198431  | -1.652641 |
| 6  | 0.36041   | 3.138917  | 1.197522  |
| 1  | 2.115333  | 1.99611   | 0.716213  |
| 6  | -0.98613  | 3.380052  | 0.917054  |
| 1  | -2.668053 | 2.841242  | -0.332597 |
| 1  | 0.858809  | 3.689506  | 1.989894  |
| 1  | -1.539117 | 4.116963  | 1.491535  |

**TSIIIa-r 2**

E = -4115.994269    ZPVE = 0.247843    NIMAG = 1.

|    |           |           |           |
|----|-----------|-----------|-----------|
| 6  | -2.497618 | 0.276364  | -0.449533 |
| 6  | -3.451072 | 0.852309  | -1.316155 |
| 6  | -2.876249 | -0.034835 | 0.873692  |
| 6  | -4.757078 | 1.074907  | -0.883146 |
| 1  | -3.163016 | 1.135607  | -2.325014 |
| 6  | -4.175485 | 0.214158  | 1.307909  |
| 1  | -2.142677 | -0.423282 | 1.57211   |
| 6  | -5.121282 | 0.754026  | 0.4277    |
| 1  | -5.484413 | 1.509551  | -1.561794 |
| 1  | -4.451538 | -0.006337 | 2.334661  |
| 1  | -6.133746 | 0.94421   | 0.771218  |
| 17 | -0.16344  | 2.888577  | -0.087068 |
| 6  | 0.973118  | 0.353075  | 2.528285  |
| 1  | 1.387445  | 1.057209  | 3.267241  |
| 1  | -0.114274 | 0.333912  | 2.658174  |
| 6  | 1.620607  | -1.018863 | 2.6272    |
| 1  | 1.445309  | -1.494822 | 3.607635  |
| 1  | 1.226768  | -1.713246 | 1.874764  |
| 1  | 2.70561   | -0.968098 | 2.483938  |
| 15 | -0.839192 | 0.08282   | -1.145042 |
| 12 | 1.491191  | 1.495022  | 0.738834  |
| 35 | 3.520539  | 1.023647  | -0.492108 |
| 6  | -0.277047 | -1.541624 | -0.618475 |
| 6  | 1.046786  | -1.864234 | -1.026896 |
| 6  | -1.071351 | -2.56552  | -0.039061 |
| 6  | 1.550007  | -3.149755 | -0.857968 |
| 1  | 1.683844  | -1.094229 | -1.455088 |
| 6  | -0.563125 | -3.850426 | 0.111066  |
| 1  | -2.094936 | -2.362181 | 0.250458  |



|   |           |           |           |
|---|-----------|-----------|-----------|
| 6 | 0.745872  | -4.146146 | -0.294887 |
| 1 | 2.566044  | -3.372777 | -1.16704  |
| 1 | -1.188327 | -4.6293   | 0.53709   |
| 1 | 1.134647  | -5.152866 | -0.173162 |

**PC<sub>IIIa-r</sub> 2**

E = -4116.120878      ZPVE = 0.253275      NIMAG = 0.

|    |           |           |           |
|----|-----------|-----------|-----------|
| 6  | 2.153291  | -0.548503 | 0.41209   |
| 6  | 2.441329  | -1.468355 | -0.610649 |
| 6  | 3.195631  | -0.122329 | 1.254369  |
| 6  | 3.744508  | -1.935619 | -0.796588 |
| 1  | 1.649221  | -1.840621 | -1.253179 |
| 6  | 4.495653  | -0.597934 | 1.070264  |
| 1  | 3.007693  | 0.583029  | 2.056965  |
| 6  | 4.773273  | -1.504334 | 0.043295  |
| 1  | 3.947161  | -2.648488 | -1.590073 |
| 1  | 5.289207  | -0.260281 | 1.730561  |
| 1  | 5.784535  | -1.874619 | -0.097179 |
| 17 | -0.689512 | -3.246682 | -1.589996 |
| 6  | 0.247865  | 0.486662  | 2.388485  |
| 1  | 0.391977  | -0.454914 | 2.93208   |
| 1  | 1.070936  | 1.152538  | 2.667199  |
| 6  | -1.093825 | 1.126306  | 2.770042  |
| 1  | -1.13498  | 1.266528  | 3.855057  |
| 1  | -1.213388 | 2.10828   | 2.302941  |
| 1  | -1.943389 | 0.508057  | 2.46933   |
| 15 | 0.422901  | 0.054961  | 0.579505  |
| 12 | -1.466925 | -1.515549 | -0.398113 |

|    |           |           |           |
|----|-----------|-----------|-----------|
| 35 | -3.547862 | -0.562027 | 0.306201  |
| 6  | 0.360969  | 1.67177   | -0.309327 |
| 6  | -0.896182 | 2.175885  | -0.688776 |
| 6  | 1.516613  | 2.404191  | -0.62576  |
| 6  | -0.988928 | 3.396768  | -1.361467 |
| 1  | -1.805146 | 1.622504  | -0.466664 |
| 6  | 1.415622  | 3.625395  | -1.295716 |
| 1  | 2.496339  | 2.02017   | -0.361189 |
| 6  | 0.163556  | 4.126214  | -1.6623   |
| 1  | -1.965318 | 3.773573  | -1.651255 |
| 1  | 2.317413  | 4.180945  | -1.536439 |
| 1  | 0.087921  | 5.073333  | -2.188261 |

### RC<sub>Ma-r</sub> 3

E = -4116.027977    ZPVE = 0.249321    NIMAG = 0.

|    |           |           |           |
|----|-----------|-----------|-----------|
| 6  | 1.359202  | 1.521061  | -0.024496 |
| 6  | 1.649929  | 2.679742  | 0.715132  |
| 6  | 1.231087  | 1.612943  | -1.420687 |
| 6  | 1.835162  | 3.904388  | 0.067957  |
| 1  | 1.717453  | 2.629887  | 1.798898  |
| 6  | 1.400153  | 2.840454  | -2.06182  |
| 1  | 0.984637  | 0.731659  | -2.004863 |
| 6  | 1.708568  | 3.986112  | -1.319961 |
| 1  | 2.058742  | 4.793007  | 0.650428  |
| 1  | 1.289828  | 2.903212  | -3.140456 |
| 1  | 1.836943  | 4.94005   | -1.82279  |
| 17 | -0.37391  | -1.056433 | -0.203127 |
| 6  | -2.334092 | 1.734634  | 1.458218  |

|    |           |           |           |
|----|-----------|-----------|-----------|
| 1  | -1.616536 | 1.440136  | 2.240899  |
| 1  | -1.766492 | 2.418199  | 0.80742   |
| 6  | -3.505195 | 2.503647  | 2.102433  |
| 1  | -3.172065 | 3.387882  | 2.66662   |
| 1  | -4.222411 | 2.858418  | 1.351726  |
| 1  | -4.071345 | 1.876258  | 2.802209  |
| 15 | 1.171076  | -0.011958 | 0.972156  |
| 12 | -2.757002 | 0.011783  | 0.324433  |
| 35 | -4.149825 | -1.587572 | -0.760897 |
| 6  | 2.608331  | -1.048682 | 0.482923  |
| 6  | 2.799023  | -2.220516 | 1.239988  |
| 6  | 3.539253  | -0.725559 | -0.518199 |
| 6  | 3.879281  | -3.063962 | 0.982886  |
| 1  | 2.09651   | -2.474435 | 2.02986   |
| 6  | 4.627286  | -1.565352 | -0.764515 |
| 1  | 3.422744  | 0.181809  | -1.100171 |
| 6  | 4.79623   | -2.736071 | -0.0204   |
| 1  | 4.009612  | -3.969095 | 1.568336  |
| 1  | 5.342694  | -1.304112 | -1.538758 |
| 1  | 5.64259   | -3.387567 | -0.217084 |

**TS<sub>IIIa-r</sub> 3**

E = -4115.995460    ZPVE = 0.248131    NIMAG = 1.

|   |          |          |           |
|---|----------|----------|-----------|
| 6 | 1.860663 | 1.580852 | 0.145767  |
| 6 | 2.074025 | 2.812407 | 0.805192  |
| 6 | 1.828107 | 1.560623 | -1.265722 |
| 6 | 2.30658  | 3.977341 | 0.076087  |
| 1 | 2.065501 | 2.850735 | 1.891668  |

|    |           |           |           |
|----|-----------|-----------|-----------|
| 6  | 2.041263  | 2.73239   | -1.988137 |
| 1  | 1.590004  | 0.639277  | -1.785136 |
| 6  | 2.290984  | 3.938211  | -1.321727 |
| 1  | 2.485859  | 4.913859  | 0.59524   |
| 1  | 2.00056   | 2.709154  | -3.073017 |
| 1  | 2.45576   | 4.848074  | -1.891349 |
| 17 | -0.57573  | -1.002568 | -0.806631 |
| 6  | -1.580301 | 0.734345  | 1.810876  |
| 1  | -1.072607 | -0.203394 | 2.07977   |
| 1  | -0.92412  | 1.332546  | 1.162826  |
| 6  | -2.132276 | 1.495833  | 2.994056  |
| 1  | -1.344937 | 1.832177  | 3.691542  |
| 1  | -2.675902 | 2.393551  | 2.677168  |
| 1  | -2.826677 | 0.882083  | 3.579436  |
| 15 | 1.568326  | 0.16024   | 1.231226  |
| 12 | -2.575004 | -0.202628 | 0.115698  |
| 35 | -4.784548 | -0.535343 | -0.706126 |
| 6  | 2.440368  | -1.225584 | 0.481473  |
| 6  | 2.161664  | -2.496749 | 1.040337  |
| 6  | 3.461693  | -1.126499 | -0.490787 |
| 6  | 2.854078  | -3.626761 | 0.6213    |
| 1  | 1.381853  | -2.592479 | 1.790666  |
| 6  | 4.165925  | -2.259192 | -0.891962 |
| 1  | 3.721533  | -0.162226 | -0.911152 |
| 6  | 3.858652  | -3.510448 | -0.347092 |
| 1  | 2.61554   | -4.596655 | 1.04646   |
| 1  | 4.955665  | -2.167176 | -1.631541 |
| 1  | 4.405147  | -4.39152  | -0.670172 |

**PCIIIa-r 3**

E = -4116.104598    ZPVE = 0.252312    NIMAG = 0.

|    |           |           |           |
|----|-----------|-----------|-----------|
| 6  | 2.84501   | -0.37743  | -0.334443 |
| 6  | 4.124382  | -0.488399 | -0.902496 |
| 6  | 2.732818  | 0.046795  | 1.002606  |
| 6  | 5.267983  | -0.184028 | -0.156629 |
| 1  | 4.224782  | -0.816687 | -1.933696 |
| 6  | 3.874048  | 0.350978  | 1.746554  |
| 1  | 1.757257  | 0.162462  | 1.467538  |
| 6  | 5.14353   | 0.234339  | 1.169406  |
| 1  | 6.250108  | -0.275701 | -0.611424 |
| 1  | 3.770282  | 0.67973   | 2.776568  |
| 1  | 6.029355  | 0.470431  | 1.752067  |
| 17 | -0.904292 | 1.271652  | 2.418551  |
| 6  | 0.48603   | -2.049345 | -0.257844 |
| 1  | -0.507501 | -2.21447  | -0.689492 |
| 1  | 0.352443  | -1.598049 | 0.734085  |
| 6  | 1.216735  | -3.392228 | -0.128691 |
| 1  | 1.340145  | -3.871447 | -1.105518 |
| 1  | 2.209088  | -3.266598 | 0.315186  |
| 1  | 0.647749  | -4.073953 | 0.511801  |
| 15 | 1.402688  | -0.856845 | -1.390915 |
| 12 | -2.04424  | 0.345178  | 0.739276  |
| 35 | -3.884229 | -1.057939 | 0.205798  |
| 6  | 0.293665  | 0.629135  | -1.265448 |
| 6  | -1.079509 | 0.489927  | -1.572814 |
| 6  | 0.771516  | 1.923895  | -0.992676 |
| 6  | -1.945988 | 1.60194   | -1.563954 |
| 1  | -1.484715 | -0.473385 | -1.872617 |

|   |           |          |           |
|---|-----------|----------|-----------|
| 6 | -0.084148 | 3.027162 | -0.994356 |
| 1 | 1.82013   | 2.070266 | -0.757566 |
| 6 | -1.447505 | 2.874373 | -1.26242  |
| 1 | -2.992102 | 1.461768 | -1.822358 |
| 1 | 0.314067  | 4.010112 | -0.761709 |
| 1 | -2.11095  | 3.733191 | -1.249519 |

**R1<sub>IV</sub> + a S<sub>N</sub>2@P-f pathways 2 and 3**

**RC<sub>IVa-r</sub> 2**

E = -3924.285661      ZPVE = 0.195671      NIMAG = 0.

|    |           |           |           |
|----|-----------|-----------|-----------|
| 17 | -0.271946 | -1.492863 | 0.278646  |
| 6  | -0.831515 | 2.238624  | 0.966601  |
| 1  | -0.3158   | 1.88237   | 1.872337  |
| 1  | -0.023859 | 2.481726  | 0.258608  |
| 6  | -1.624583 | 3.520082  | 1.296619  |
| 1  | -2.122736 | 3.931687  | 0.410016  |
| 1  | -2.411444 | 3.334346  | 2.038274  |
| 1  | -0.988512 | 4.320711  | 1.703533  |
| 15 | 1.52952   | -0.972747 | 1.418974  |
| 12 | -1.911379 | 0.614566  | 0.165847  |
| 35 | -3.825479 | -0.459474 | -0.763113 |
| 6  | 2.236292  | -2.684774 | 1.457884  |
| 1  | 1.605673  | -3.315898 | 2.089316  |
| 1  | 2.336524  | -3.147064 | 0.472952  |
| 1  | 3.227905  | -2.61279  | 1.919394  |
| 6  | 2.541284  | -0.165962 | 0.117446  |
| 6  | 2.962769  | -0.777758 | -1.076568 |
| 6  | 2.922182  | 1.161583  | 0.378051  |
| 6  | 3.759883  | -0.078851 | -1.981164 |

|   |          |           |           |
|---|----------|-----------|-----------|
| 1 | 2.659184 | -1.793652 | -1.310787 |
| 6 | 3.73269  | 1.856279  | -0.524362 |
| 1 | 2.583612 | 1.651608  | 1.286626  |
| 6 | 4.148634 | 1.237827  | -1.704205 |
| 1 | 4.076324 | -0.556805 | -2.903547 |
| 1 | 4.0247   | 2.879803  | -0.310194 |
| 1 | 4.771186 | 1.778338  | -2.411139 |

## TS<sub>IVa-r</sub> 2

E = -3924.249623      ZPVE = 0.194494      NIMAG = 1.

|    |           |           |           |
|----|-----------|-----------|-----------|
| 17 | -0.375372 | -1.351196 | 0.896262  |
| 6  | -0.77348  | 1.827206  | 0.414881  |
| 1  | -0.652796 | 1.551042  | 1.472094  |
| 1  | 0.025783  | 1.371018  | -0.185815 |
| 6  | -0.958709 | 3.307911  | 0.184226  |
| 1  | -1.132941 | 3.53151   | -0.874578 |
| 1  | -1.814966 | 3.69633   | 0.7473    |
| 1  | -0.082079 | 3.902089  | 0.496206  |
| 15 | 1.884774  | 0.627313  | 1.549917  |
| 12 | -2.048118 | 0.0912    | 0.084941  |
| 35 | -4.229368 | -0.46734  | -0.672998 |
| 6  | 2.128884  | -0.74634  | 2.756684  |
| 1  | 1.399997  | -0.629364 | 3.562073  |
| 1  | 2.041747  | -1.754331 | 2.350828  |
| 1  | 3.13319   | -0.604399 | 3.182448  |
| 6  | 2.765133  | 0.08498   | 0.074451  |
| 6  | 3.201751  | -1.22991  | -0.198614 |
| 6  | 3.085973  | 1.109741  | -0.848588 |

|   |          |           |           |
|---|----------|-----------|-----------|
| 6 | 3.946056 | -1.502516 | -1.342495 |
| 1 | 2.944846 | -2.040871 | 0.472678  |
| 6 | 3.829877 | 0.833156  | -1.992065 |
| 1 | 2.747108 | 2.125097  | -0.65875  |
| 6 | 4.261767 | -0.474524 | -2.239756 |
| 1 | 4.272805 | -2.518174 | -1.543835 |
| 1 | 4.07097  | 1.629832  | -2.688949 |
| 1 | 4.837833 | -0.694863 | -3.133633 |

**PC<sub>IVa-r</sub> 2**

E = -3924.345494    ZPVE = 0.198107    NIMAG = 0.

|    |           |           |           |
|----|-----------|-----------|-----------|
| 17 | 1.151617  | 2.818814  | 0.303095  |
| 6  | 0.109535  | -0.926414 | 0.011544  |
| 1  | 0.984308  | -1.245834 | 0.599063  |
| 1  | 0.057134  | 0.177176  | -0.043244 |
| 6  | 0.15323   | -1.544674 | -1.393052 |
| 1  | -0.711287 | -1.228424 | -1.983973 |
| 1  | 1.061568  | -1.263099 | -1.938054 |
| 1  | 0.141613  | -2.636717 | -1.328412 |
| 15 | -1.388602 | -1.46768  | 1.028936  |
| 12 | 2.179313  | 0.883686  | -0.032926 |
| 35 | 3.980907  | -0.583486 | -0.34998  |
| 6  | -1.074646 | -0.452379 | 2.56295   |
| 1  | -0.209257 | -0.864897 | 3.092449  |
| 1  | -0.899576 | 0.609831  | 2.362853  |
| 1  | -1.940876 | -0.542631 | 3.224792  |
| 6  | -2.734445 | -0.494068 | 0.201599  |
| 6  | -2.694258 | 0.898096  | 0.00606   |



|   |           |           |           |
|---|-----------|-----------|-----------|
| 6 | -3.860102 | -1.202255 | -0.249091 |
| 6 | -3.749333 | 1.559155  | -0.62563  |
| 1 | -1.841267 | 1.482093  | 0.34248   |
| 6 | -4.919086 | -0.541499 | -0.880148 |
| 1 | -3.90685  | -2.278374 | -0.103406 |
| 6 | -4.864391 | 0.840485  | -1.069939 |
| 1 | -3.700112 | 2.634542  | -0.770834 |
| 1 | -5.781889 | -1.1063   | -1.221508 |
| 1 | -5.684488 | 1.357106  | -1.560218 |

**P<sub>IVa-r</sub> 2**

E = -692.176821      ZPVE = 0.195001      NIMAG = 0.

|    |           |           |           |
|----|-----------|-----------|-----------|
| 6  | 2.25932   | 0.686397  | 0.540459  |
| 1  | 3.323543  | 0.419995  | 0.503621  |
| 1  | 1.914294  | 0.472844  | 1.560486  |
| 6  | 2.08052   | 2.174389  | 0.214471  |
| 1  | 1.026774  | 2.468606  | 0.262563  |
| 1  | 2.632536  | 2.798566  | 0.9261    |
| 1  | 2.44696   | 2.407814  | -0.791073 |
| 15 | 1.405649  | -0.447517 | -0.689098 |
| 6  | 1.755744  | -2.089705 | 0.129997  |
| 1  | 1.497794  | -2.109279 | 1.194578  |
| 1  | 1.193253  | -2.876159 | -0.381584 |
| 1  | 2.822007  | -2.315266 | 0.024428  |
| 6  | -0.382364 | -0.196535 | -0.23977  |
| 6  | -1.27533  | 0.146479  | -1.267398 |
| 6  | -0.889846 | -0.328394 | 1.064368  |
| 6  | -2.633917 | 0.352347  | -1.004595 |

|   |           |           |           |
|---|-----------|-----------|-----------|
| 1 | -0.900694 | 0.251788  | -2.282343 |
| 6 | -2.244919 | -0.124372 | 1.332223  |
| 1 | -0.227154 | -0.592669 | 1.884536  |
| 6 | -3.121422 | 0.216998  | 0.296573  |
| 1 | -3.307346 | 0.616975  | -1.815091 |
| 1 | -2.617663 | -0.231504 | 2.347379  |
| 1 | -4.175765 | 0.375421  | 0.504889  |

### RC<sub>IVa-r</sub> 3

E = -3924.289865      ZPVE = 0.195947      NIMAG = 0.

|    |           |           |           |
|----|-----------|-----------|-----------|
| 17 | 0.15644   | 1.070709  | 0.215899  |
| 6  | 3.701386  | 2.486251  | -0.214083 |
| 1  | 4.178842  | 2.567948  | -1.202522 |
| 1  | 4.537631  | 2.454195  | 0.500558  |
| 6  | 2.846917  | 3.742959  | 0.048031  |
| 1  | 2.393575  | 3.730067  | 1.047392  |
| 1  | 3.432433  | 4.671936  | -0.021053 |
| 1  | 2.021967  | 3.835942  | -0.66941  |
| 15 | -0.906915 | -0.846023 | -0.118322 |
| 12 | 2.721216  | 0.622071  | -0.139962 |
| 35 | 2.682407  | -1.786914 | -0.179368 |
| 6  | -0.699172 | -1.534515 | 1.585527  |
| 1  | 0.349085  | -1.82184  | 1.696249  |
| 1  | -0.98601  | -0.849316 | 2.386721  |
| 1  | -1.31876  | -2.43718  | 1.644344  |
| 6  | -2.632138 | -0.214317 | -0.088636 |
| 6  | -3.295684 | 0.318141  | 1.030846  |
| 6  | -3.32604  | -0.313167 | -1.307658 |

|   |           |          |           |
|---|-----------|----------|-----------|
| 6 | -4.623056 | 0.732484 | 0.932447  |
| 1 | -2.778253 | 0.416812 | 1.979986  |
| 6 | -4.658174 | 0.097054 | -1.404343 |
| 1 | -2.820435 | -0.71691 | -2.181358 |
| 6 | -5.30639  | 0.620974 | -0.284562 |
| 1 | -5.12578  | 1.144902 | 1.802385  |
| 1 | -5.183938 | 0.009686 | -2.350319 |
| 1 | -6.340841 | 0.943999 | -0.356432 |

### TS<sub>IVa-r</sub> 3

E = -3924.254163      ZPVE = 0.195025      NIMAG = 1.

|    |           |           |           |
|----|-----------|-----------|-----------|
| 17 | -1.005399 | 2.19183   | 1.175667  |
| 6  | -0.28887  | -1.408057 | 1.568645  |
| 1  | 0.076484  | -2.09213  | 0.798078  |
| 1  | -1.176246 | -1.856388 | 2.045404  |
| 6  | 0.75343   | -0.991942 | 2.583052  |
| 1  | 0.357054  | -0.270313 | 3.305658  |
| 1  | 1.124321  | -1.854102 | 3.16262   |
| 1  | 1.631018  | -0.53491  | 2.111805  |
| 15 | 0.541728  | 0.893455  | -0.895318 |
| 12 | -1.654044 | 0.024109  | 0.572399  |
| 35 | -3.541393 | -0.795017 | -0.644071 |
| 6  | 1.0323    | 2.653985  | -1.163102 |
| 1  | 0.130782  | 3.229518  | -1.37739  |
| 1  | 1.532456  | 3.109512  | -0.305467 |
| 1  | 1.704229  | 2.682236  | -2.029598 |
| 6  | 2.111711  | 0.087161  | -0.559793 |
| 6  | 3.290186  | 0.744296  | -0.136406 |

|   |          |           |           |
|---|----------|-----------|-----------|
| 6 | 2.168322 | -1.305853 | -0.814321 |
| 6 | 4.479292 | 0.036977  | 0.011783  |
| 1 | 3.273501 | 1.805316  | 0.086415  |
| 6 | 3.366635 | -2.002395 | -0.690631 |
| 1 | 1.273179 | -1.828374 | -1.137153 |
| 6 | 4.521736 | -1.334562 | -0.269419 |
| 1 | 5.375237 | 0.551298  | 0.345758  |
| 1 | 3.399192 | -3.064975 | -0.910087 |
| 1 | 5.453489 | -1.880976 | -0.157769 |

**PC<sub>IVa-r</sub> 3**

E = -3924.378363      ZPVE = 0.199564      NIMAG = 0.

|    |           |           |           |
|----|-----------|-----------|-----------|
| 17 | -2.825915 | 2.041826  | -1.690433 |
| 6  | 0.455206  | 0.660739  | 2.270229  |
| 1  | 0.168899  | -0.392882 | 2.358332  |
| 1  | -0.367417 | 1.236437  | 2.713584  |
| 6  | 1.770195  | 0.938859  | 3.004944  |
| 1  | 2.025682  | 2.003332  | 3.000707  |
| 1  | 1.685294  | 0.62718   | 4.051311  |
| 1  | 2.603441  | 0.386775  | 2.559708  |
| 15 | 0.407664  | 1.028623  | 0.443067  |
| 12 | -1.933412 | 0.377232  | -0.492983 |
| 35 | -2.263163 | -1.79961  | 0.449309  |
| 6  | 0.887216  | 2.802452  | 0.291329  |
| 1  | 0.105478  | 3.407605  | 0.759097  |
| 1  | 1.843261  | 3.029604  | 0.769854  |
| 1  | 0.932722  | 3.078102  | -0.765271 |
| 6  | 1.78448   | 0.058201  | -0.295156 |

|   |          |           |           |
|---|----------|-----------|-----------|
| 6 | 3.022051 | 0.626526  | -0.636623 |
| 6 | 1.570814 | -1.310838 | -0.541141 |
| 6 | 4.030202 | -0.159376 | -1.201294 |
| 1 | 3.211179 | 1.681708  | -0.469018 |
| 6 | 2.585005 | -2.093433 | -1.095965 |
| 1 | 0.614933 | -1.768887 | -0.298157 |
| 6 | 3.815593 | -1.520611 | -1.428455 |
| 1 | 4.981692 | 0.294513  | -1.462641 |
| 1 | 2.407325 | -3.149369 | -1.276411 |
| 1 | 4.600168 | -2.130047 | -1.866974 |

**PIV<sub>a-r</sub> 3**

E = -692.175143      ZPVE = 0.195133      NIMAG = 0.

|    |           |           |           |
|----|-----------|-----------|-----------|
| 6  | -2.141856 | -1.170967 | 0.121008  |
| 1  | -1.732956 | -2.122467 | -0.239964 |
| 1  | -3.206328 | -1.184627 | -0.147773 |
| 6  | -1.971225 | -1.06675  | 1.640447  |
| 1  | -2.440719 | -0.16344  | 2.043068  |
| 1  | -2.437529 | -1.925126 | 2.138523  |
| 1  | -0.913912 | -1.05063  | 1.922955  |
| 15 | -1.367192 | 0.15401   | -0.971805 |
| 6  | -2.033268 | 1.709596  | -0.193023 |
| 1  | -3.113541 | 1.73405   | -0.369151 |
| 1  | -1.854603 | 1.793682  | 0.883492  |
| 1  | -1.600098 | 2.580999  | -0.693064 |
| 6  | 0.391288  | 0.117111  | -0.384866 |
| 6  | 0.994732  | 1.116247  | 0.395596  |
| 6  | 1.189965  | -0.9622   | -0.808193 |

|   |          |           |           |
|---|----------|-----------|-----------|
| 6 | 2.345168 | 1.03318   | 0.75236   |
| 1 | 0.417447 | 1.970135  | 0.735358  |
| 6 | 2.532829 | -1.055954 | -0.440781 |
| 1 | 0.75794  | -1.734396 | -1.441098 |
| 6 | 3.117551 | -0.054629 | 0.341419  |
| 1 | 2.790086 | 1.820082  | 1.35552   |
| 1 | 3.125717 | -1.902904 | -0.775074 |
| 1 | 4.165261 | -0.119313 | 0.620478  |

**R1v + a SN2@P-f pathway 2**

**RC<sub>va-r</sub> 2**

E = -3732.547882    ZPVE = 0.142484    NIMAG = 0.

|    |           |           |           |
|----|-----------|-----------|-----------|
| 17 | 2.333742  | -0.007657 | 1.53493   |
| 6  | -1.988862 | 2.420551  | -0.064686 |
| 1  | -1.409009 | 3.016391  | 0.658098  |
| 1  | -1.753444 | 2.864889  | -1.045372 |
| 6  | -3.495243 | 2.587417  | 0.222809  |
| 1  | -4.112038 | 2.04176   | -0.502024 |
| 1  | -3.765819 | 2.20547   | 1.214996  |
| 1  | -3.819491 | 3.63824   | 0.188225  |
| 15 | 1.54987   | 0.502748  | -0.338942 |
| 12 | -1.197007 | 0.465306  | -0.054714 |
| 35 | -1.29153  | -1.93758  | -0.037089 |
| 6  | 2.546535  | 1.998362  | -0.753219 |
| 1  | 2.293995  | 2.80869   | -0.065218 |
| 1  | 3.619898  | 1.795915  | -0.702152 |
| 1  | 2.28295   | 2.313338  | -1.769261 |
| 6  | 2.282953  | -0.792269 | -1.420419 |
| 1  | 2.053303  | -0.540826 | -2.462248 |

|   |          |           |           |
|---|----------|-----------|-----------|
| 1 | 3.366975 | -0.856308 | -1.292158 |
| 1 | 1.816347 | -1.751358 | -1.184778 |

**TS<sub>Va-r</sub> 2**

E = -3732.504760    ZPVE = 0.140972    NIMAG = 1.

|    |           |           |           |
|----|-----------|-----------|-----------|
| 17 | -1.053635 | -0.862954 | -1.705142 |
| 6  | -0.14543  | 2.075603  | 0.471603  |
| 1  | -1.177542 | 2.403938  | 0.568142  |
| 1  | 0.30246   | 1.937715  | 1.461884  |
| 6  | 0.659048  | 2.972724  | -0.466349 |
| 1  | 1.688269  | 2.623805  | -0.621673 |
| 1  | 0.180962  | 3.073013  | -1.447707 |
| 1  | 0.745686  | 3.990859  | -0.050698 |
| 15 | -2.072349 | -0.112863 | 0.942661  |
| 12 | 0.540012  | 0.116305  | -0.348985 |
| 35 | 2.718776  | -0.580579 | 0.310063  |
| 6  | -3.445472 | 0.860724  | 0.183228  |
| 1  | -3.245569 | 1.932189  | 0.222649  |
| 1  | -3.620235 | 0.557104  | -0.852699 |
| 1  | -4.352364 | 0.649821  | 0.764862  |
| 6  | -2.790907 | -1.811336 | 0.774134  |
| 1  | -3.457882 | -1.921132 | 1.643784  |
| 1  | -3.35948  | -1.97798  | -0.142374 |
| 1  | -2.00802  | -2.567849 | 0.861236  |

**PC<sub>Va-r</sub> 2**

E = -3732.599362    ZPVE = 0.144562    NIMAG = 0.

|    |           |           |           |
|----|-----------|-----------|-----------|
| 17 | 1.856773  | 2.921765  | 0.286615  |
| 6  | -2.939713 | -1.42866  | -0.108536 |
| 1  | -4.014614 | -1.651112 | -0.129251 |
| 1  | -2.485796 | -2.1109   | -0.838244 |
| 6  | -2.371395 | -1.699091 | 1.290236  |
| 1  | -1.285349 | -1.565356 | 1.32541   |
| 1  | -2.820949 | -1.051797 | 2.049953  |
| 1  | -2.572206 | -2.734765 | 1.585902  |
| 15 | -2.793668 | 0.284047  | -0.861491 |
| 12 | 1.595549  | 0.741201  | 0.017538  |
| 35 | 2.16539   | -1.539195 | -0.087231 |
| 6  | -3.492666 | 1.36816   | 0.483733  |
| 1  | -4.570163 | 1.189701  | 0.55835   |
| 1  | -3.039882 | 1.206131  | 1.46743   |
| 1  | -3.351378 | 2.416567  | 0.20339   |
| 6  | -0.960195 | 0.635001  | -0.604984 |
| 1  | -0.76028  | 1.661588  | -0.926911 |
| 1  | -0.70376  | 0.51458   | 0.460734  |
| 1  | -0.407172 | -0.0804   | -1.226906 |

**P<sub>Va-r</sub> 2**

E = -500.431220      ZPVE = 0.141299      NIMAG = 0.

|   |          |           |           |
|---|----------|-----------|-----------|
| 6 | 1.209136 | -0.000052 | -0.708447 |
| 1 | 1.484719 | -0.873662 | -1.313431 |
| 1 | 1.484767 | 0.873475  | -1.31353  |
| 6 | 2.001727 | 0.000002  | 0.60501   |
| 1 | 1.785149 | 0.884535  | 1.212665  |



|    |           |           |           |
|----|-----------|-----------|-----------|
| 1  | 1.785073  | -0.884428 | 1.212787  |
| 1  | 3.079446  | -0.000058 | 0.403163  |
| 15 | -0.670262 | -0.000002 | -0.657375 |
| 6  | -1.016201 | -1.426678 | 0.496883  |
| 1  | -0.698771 | -2.363222 | 0.026651  |
| 1  | -0.522949 | -1.334669 | 1.4708    |
| 1  | -2.096609 | -1.491405 | 0.661269  |
| 6  | -1.016132 | 1.426727  | 0.496837  |
| 1  | -2.09654  | 1.491529  | 0.661196  |
| 1  | -0.522909 | 1.33471   | 1.470768  |
| 1  | -0.69863  | 2.363237  | 0.026587  |

**R1 + b** SN2@P-b pathways 2 and 3 in the gas phase

**RC1b-i 2**

E = -4543.911005      ZPVE = 0.490191      NIMAG = 0.

|   |           |           |           |
|---|-----------|-----------|-----------|
| 6 | 1.328587  | -2.064608 | 0.525775  |
| 6 | -1.088443 | -2.577312 | -0.127637 |
| 6 | -0.424222 | -2.587054 | 2.343996  |
| 6 | 1.037827  | -2.724895 | 1.891624  |
| 6 | -1.344999 | -3.17395  | 1.264418  |
| 6 | 0.658882  | -2.173666 | -2.012825 |
| 6 | -0.651224 | -3.237429 | 3.713518  |
| 6 | 2.061666  | -2.579516 | -2.499498 |
| 6 | -0.38767  | -2.681067 | -3.021476 |
| 1 | 2.367816  | -2.284193 | 0.263409  |
| 1 | -1.718694 | -3.099815 | -0.852271 |
| 1 | -1.416727 | -1.531568 | -0.150441 |
| 1 | -0.653505 | -1.514557 | 2.442097  |

|    |           |           |           |
|----|-----------|-----------|-----------|
| 1  | 1.715084  | -2.338215 | 2.657272  |
| 1  | 1.271037  | -3.794774 | 1.783055  |
| 1  | -2.39626  | -3.02195  | 1.54038   |
| 1  | -1.189326 | -4.263151 | 1.227143  |
| 1  | 0.597355  | -1.075173 | -2.01883  |
| 1  | -0.016007 | -2.783293 | 4.481995  |
| 1  | -1.693835 | -3.130664 | 4.03384   |
| 1  | -0.42301  | -4.31027  | 3.680132  |
| 1  | 2.151161  | -3.672864 | -2.537882 |
| 1  | 2.242255  | -2.197685 | -3.50984  |
| 1  | 2.863792  | -2.196977 | -1.863984 |
| 1  | -0.465191 | -3.775854 | -2.992507 |
| 1  | -0.093481 | -2.39987  | -4.038349 |
| 1  | -1.379671 | -2.260602 | -2.8415   |
| 6  | 2.637263  | 0.405231  | -0.457191 |
| 6  | 2.404392  | 1.41644   | -1.401235 |
| 6  | 3.937929  | -0.106327 | -0.312066 |
| 6  | 3.441839  | 1.881719  | -2.213063 |
| 1  | 1.421939  | 1.869131  | -1.492535 |
| 6  | 4.975403  | 0.36762   | -1.113401 |
| 1  | 4.148718  | -0.862305 | 0.438816  |
| 6  | 4.726905  | 1.356632  | -2.072066 |
| 1  | 3.244285  | 2.663503  | -2.939991 |
| 1  | 5.977755  | -0.031403 | -0.988693 |
| 1  | 5.53629   | 1.7234    | -2.696414 |
| 17 | 1.938336  | 0.292938  | 2.499979  |
| 6  | 0.388343  | -2.677163 | -0.565502 |
| 1  | 0.644892  | -3.750354 | -0.565773 |
| 15 | 1.222728  | -0.160917 | 0.572248  |
| 12 | -0.937711 | 1.49678   | 0.09664   |

|    |           |           |           |
|----|-----------|-----------|-----------|
| 35 | 0.024938  | 3.452663  | 1.085585  |
| 6  | -2.322258 | 0.905552  | -1.390695 |
| 6  | -2.720339 | 0.779014  | -2.727556 |
| 6  | -3.311085 | 0.614501  | -0.445496 |
| 6  | -4.022529 | 0.385949  | -3.077695 |
| 1  | -2.012417 | 0.996656  | -3.525882 |
| 6  | -4.617466 | 0.226605  | -0.727643 |
| 6  | -4.963651 | 0.112642  | -2.082396 |
| 1  | -4.304699 | 0.300072  | -4.123925 |
| 1  | -5.350367 | 0.01739   | 0.045312  |
| 1  | -5.972926 | -0.186573 | -2.350746 |
| 8  | -2.803682 | 0.751684  | 0.882677  |
| 6  | -3.711706 | 0.90986   | 1.976947  |
| 1  | -3.103233 | 1.121121  | 2.856809  |
| 1  | -4.39494  | 1.744518  | 1.787724  |
| 1  | -4.28222  | -0.010598 | 2.13862   |

**TS<sub>1b-i</sub> 2**

E = -4543.867859      ZPVE = 0.490831      NIMAG = 1.

|   |           |           |           |
|---|-----------|-----------|-----------|
| 6 | -1.888368 | -0.728016 | -1.159831 |
| 6 | -1.890357 | -2.546599 | 0.66671   |
| 6 | -0.700377 | -2.99476  | -1.556762 |
| 6 | -1.490231 | -1.830989 | -2.174857 |
| 6 | -1.478732 | -3.596969 | -0.377066 |
| 6 | -3.323405 | -0.35742  | 1.002296  |
| 6 | -0.357561 | -4.051396 | -2.61504  |
| 6 | -4.605422 | 0.227952  | 0.378602  |
| 6 | -3.665784 | -0.93832  | 2.384601  |

|    |           |           |           |
|----|-----------|-----------|-----------|
| 1  | -2.573823 | -0.052609 | -1.679683 |
| 1  | -2.523453 | -3.031501 | 1.416112  |
| 1  | -1.009676 | -2.176748 | 1.19591   |
| 1  | 0.244439  | -2.596751 | -1.159477 |
| 1  | -0.94683  | -1.394256 | -3.016271 |
| 1  | -2.426916 | -2.228592 | -2.593044 |
| 1  | -0.88476  | -4.386081 | 0.103169  |
| 1  | -2.382277 | -4.088021 | -0.770516 |
| 1  | -2.619402 | 0.463928  | 1.166693  |
| 1  | 0.22582   | -3.621353 | -3.437106 |
| 1  | 0.223112  | -4.874508 | -2.182101 |
| 1  | -1.269489 | -4.482544 | -3.046586 |
| 1  | -5.391251 | -0.536798 | 0.336938  |
| 1  | -4.986901 | 1.0653    | 0.973012  |
| 1  | -4.45288  | 0.590806  | -0.642753 |
| 1  | -4.35568  | -1.787777 | 2.304628  |
| 1  | -4.159578 | -0.17459  | 2.99609   |
| 1  | -2.776638 | -1.270911 | 2.926835  |
| 6  | -0.850704 | 2.134733  | -0.326064 |
| 6  | 0.151657  | 2.933262  | 0.246693  |
| 6  | -2.122223 | 2.691423  | -0.519193 |
| 6  | -0.111291 | 4.251353  | 0.623444  |
| 1  | 1.150367  | 2.53959   | 0.416651  |
| 6  | -2.391561 | 4.003689  | -0.126756 |
| 1  | -2.901029 | 2.118995  | -1.007047 |
| 6  | -1.387382 | 4.789472  | 0.444242  |
| 1  | 0.683379  | 4.851656  | 1.056058  |
| 1  | -3.384045 | 4.415349  | -0.28523  |
| 1  | -1.595052 | 5.813773  | 0.739184  |
| 17 | -0.715632 | 1.225698  | -3.213081 |

|    |           |           |           |
|----|-----------|-----------|-----------|
| 6  | -2.665214 | -1.378586 | 0.025695  |
| 1  | -3.509858 | -1.860771 | -0.497718 |
| 15 | -0.387254 | 0.468688  | -0.972087 |
| 12 | 1.971149  | 0.05802   | -0.583678 |
| 35 | 4.180962  | 0.877164  | -0.543654 |
| 6  | 0.419808  | -0.099661 | 1.28043   |
| 6  | -0.134051 | 0.539476  | 2.400765  |
| 6  | 1.321525  | -1.133014 | 1.581371  |
| 6  | 0.154015  | 0.149101  | 3.713446  |
| 1  | -0.820178 | 1.368603  | 2.253428  |
| 6  | 1.663927  | -1.54111  | 2.87051   |
| 6  | 1.052006  | -0.893234 | 3.947041  |
| 1  | -0.314712 | 0.662023  | 4.548563  |
| 1  | 2.382282  | -2.332157 | 3.052574  |
| 1  | 1.291453  | -1.200105 | 4.960705  |
| 8  | 1.923745  | -1.724828 | 0.431247  |
| 6  | 2.968568  | -2.701601 | 0.593122  |
| 1  | 3.270301  | -2.98967  | -0.413765 |
| 1  | 3.819006  | -2.268632 | 1.126679  |
| 1  | 2.578361  | -3.573916 | 1.123417  |

**PC<sub>1b-i</sub> 2**

E = -4543.978525      ZPVE = 0.493369      NIMAG = 0.

|   |           |           |           |
|---|-----------|-----------|-----------|
| 6 | -1.835649 | -0.634327 | -1.152467 |
| 6 | -2.536906 | -2.116188 | 0.800532  |
| 6 | -0.989223 | -3.083156 | -1.005665 |
| 6 | -1.384322 | -1.90705  | -1.915918 |
| 6 | -2.089147 | -3.368149 | 0.029717  |

|   |           |           |           |
|---|-----------|-----------|-----------|
| 6 | -3.740306 | 0.213857  | 0.438649  |
| 6 | -0.653393 | -4.329496 | -1.83377  |
| 6 | -4.797708 | 0.734534  | -0.554986 |
| 6 | -4.416408 | -0.060953 | 1.792114  |
| 1 | -2.230034 | 0.059624  | -1.903631 |
| 1 | -3.364426 | -2.387876 | 1.462845  |
| 1 | -1.728454 | -1.758145 | 1.447998  |
| 1 | -0.081388 | -2.793993 | -0.458983 |
| 1 | -0.559396 | -1.679811 | -2.599685 |
| 1 | -2.232195 | -2.21942  | -2.543894 |
| 1 | -1.743748 | -4.137816 | 0.732138  |
| 1 | -2.962123 | -3.794579 | -0.488049 |
| 1 | -3.014162 | 1.015829  | 0.607821  |
| 1 | 0.174456  | -4.131769 | -2.520463 |
| 1 | -0.359227 | -5.163001 | -1.185373 |
| 1 | -1.523033 | -4.654754 | -2.419318 |
| 1 | -5.625982 | 0.019927  | -0.636356 |
| 1 | -5.216098 | 1.692298  | -0.226212 |
| 1 | -4.396164 | 0.874946  | -1.564711 |
| 1 | -5.156893 | -0.86634  | 1.716107  |
| 1 | -4.944781 | 0.836273  | 2.133637  |
| 1 | -3.694941 | -0.334845 | 2.566983  |
| 6 | -0.518318 | 2.101405  | -1.023536 |
| 6 | 0.638072  | 2.904618  | -1.032068 |
| 6 | -1.738064 | 2.676449  | -1.411357 |
| 6 | 0.562912  | 4.249539  | -1.395885 |
| 1 | 1.598787  | 2.492065  | -0.736184 |
| 6 | -1.80612  | 4.020624  | -1.790068 |
| 1 | -2.64732  | 2.090257  | -1.427222 |
| 6 | -0.657362 | 4.813097  | -1.778035 |

|    |           |           |           |
|----|-----------|-----------|-----------|
| 1  | 1.466313  | 4.851986  | -1.387171 |
| 1  | -2.760663 | 4.443809  | -2.089508 |
| 1  | -0.710319 | 5.857728  | -2.070472 |
| 17 | 2.526663  | -2.286459 | -2.259697 |
| 6  | -2.989612 | -1.009105 | -0.172442 |
| 1  | -3.726761 | -1.500902 | -0.829463 |
| 15 | -0.291664 | 0.330706  | -0.54584  |
| 12 | 2.145886  | -0.618424 | -0.785512 |
| 35 | 3.676652  | 0.983404  | 0.175798  |
| 6  | -0.143373 | 0.390691  | 1.300897  |
| 6  | -0.756354 | 1.367459  | 2.09642   |
| 6  | 0.751965  | -0.501246 | 1.931952  |
| 6  | -0.540258 | 1.430928  | 3.473643  |
| 1  | -1.399528 | 2.103622  | 1.626213  |
| 6  | 0.972811  | -0.453343 | 3.308175  |
| 6  | 0.316547  | 0.511448  | 4.076436  |
| 1  | -1.029938 | 2.197809  | 4.065155  |
| 1  | 1.665404  | -1.134198 | 3.785755  |
| 1  | 0.498448  | 0.549695  | 5.14608   |
| 8  | 1.405662  | -1.415726 | 1.109719  |
| 6  | 2.320832  | -2.365306 | 1.704146  |
| 1  | 2.66643   | -2.98738  | 0.877587  |
| 1  | 3.163654  | -1.84018  | 2.161261  |
| 1  | 1.793329  | -2.981887 | 2.43611   |

**RC1b-i 3**

E = -4543.901546    ZPVE = 0.489768    NIMAG = 0.

|   |          |          |          |
|---|----------|----------|----------|
| 6 | 3.145089 | 0.258324 | 0.285358 |
|---|----------|----------|----------|

|   |           |           |           |
|---|-----------|-----------|-----------|
| 6 | 3.018114  | -0.665006 | -2.090042 |
| 6 | 4.634272  | -1.73706  | -0.406974 |
| 6 | 4.505825  | -0.461189 | 0.443776  |
| 6 | 4.344595  | -1.414858 | -1.88202  |
| 6 | 1.70836   | 1.530665  | -1.498735 |
| 6 | 6.01102   | -2.388009 | -0.226395 |
| 6 | 1.982246  | 2.961537  | -1.000653 |
| 6 | 1.29472   | 1.599047  | -2.978979 |
| 1 | 3.18779   | 1.180392  | 0.873023  |
| 1 | 2.929208  | -0.399585 | -3.147621 |
| 1 | 2.176541  | -1.333782 | -1.863835 |
| 1 | 3.877615  | -2.457703 | -0.061406 |
| 1 | 4.70131   | -0.686542 | 1.495483  |
| 1 | 5.283586  | 0.250385  | 0.128141  |
| 1 | 4.346456  | -2.339167 | -2.474149 |
| 1 | 5.166544  | -0.795566 | -2.273037 |
| 1 | 0.839653  | 1.145835  | -0.946417 |
| 1 | 6.191214  | -2.652735 | 0.821375  |
| 1 | 6.097826  | -3.302994 | -0.823406 |
| 1 | 6.811206  | -1.706788 | -0.542898 |
| 1 | 1.081987  | 3.576721  | -1.079166 |
| 1 | 2.31067   | 2.991929  | 0.042223  |
| 1 | 2.769783  | 3.426624  | -1.607507 |
| 1 | 2.126312  | 1.938593  | -3.609895 |
| 1 | 0.469724  | 2.307905  | -3.096425 |
| 1 | 0.954014  | 0.634322  | -3.368384 |
| 6 | 0.495328  | 0.374935  | 1.703124  |
| 6 | 0.779744  | 1.647174  | 2.216117  |
| 6 | -0.814456 | -0.126504 | 1.846868  |
| 6 | -0.219069 | 2.416915  | 2.818711  |



|    |           |           |           |
|----|-----------|-----------|-----------|
| 1  | 1.784452  | 2.05074   | 2.154353  |
| 6  | -1.811312 | 0.633487  | 2.473392  |
| 1  | -1.04345  | -1.133804 | 1.505729  |
| 6  | -1.515778 | 1.91856   | 2.944073  |
| 1  | 0.018961  | 3.409441  | 3.189265  |
| 1  | -2.801952 | 0.209025  | 2.615037  |
| 1  | -2.287703 | 2.516448  | 3.418209  |
| 17 | 2.530519  | -1.551723 | 2.76921   |
| 6  | 2.934779  | 0.612563  | -1.226264 |
| 1  | 3.821623  | 1.211857  | -1.492703 |
| 15 | 1.704221  | -0.807913 | 0.938257  |
| 12 | -2.694917 | 0.642333  | -0.206594 |
| 35 | -1.929685 | 2.803651  | -0.844599 |
| 6  | -4.096593 | -0.909039 | 0.027165  |
| 6  | -3.366833 | -1.799393 | -0.767888 |
| 6  | -5.293473 | -1.413711 | 0.549036  |
| 6  | -3.731891 | -3.109251 | -1.062922 |
| 6  | -5.717368 | -2.726617 | 0.284768  |
| 1  | -5.922854 | -0.781166 | 1.172753  |
| 6  | -4.940061 | -3.566305 | -0.514805 |
| 1  | -3.130487 | -3.764046 | -1.685001 |
| 1  | -6.65207  | -3.09239  | 0.701428  |
| 1  | -5.265823 | -4.581979 | -0.719976 |
| 8  | -2.172908 | -1.184539 | -1.246832 |
| 6  | -1.323672 | -1.890092 | -2.155286 |
| 1  | -1.877196 | -2.160479 | -3.060714 |
| 1  | -0.509797 | -1.211282 | -2.408967 |
| 1  | -0.917547 | -2.788739 | -1.679761 |

**TS<sub>lb-i</sub> 3**

E = -4543.856328      ZPVE = 0.490331      NIMAG = 1.

|   |           |           |           |
|---|-----------|-----------|-----------|
| 6 | -2.26045  | 0.987283  | 0.430042  |
| 6 | -2.994695 | -1.440086 | 0.849369  |
| 6 | -4.028857 | -0.136091 | -1.0962   |
| 6 | -3.550895 | 1.160425  | -0.422882 |
| 6 | -4.227732 | -1.239453 | -0.046775 |
| 6 | -1.496625 | -0.227277 | 2.640244  |
| 6 | -5.302044 | 0.103079  | -1.917728 |
| 6 | -1.524195 | 1.028926  | 3.534476  |
| 6 | -1.700563 | -1.463578 | 3.535667  |
| 1 | -2.084686 | 1.938734  | 0.936101  |
| 1 | -3.248625 | -2.167183 | 1.626968  |
| 1 | -2.182568 | -1.880635 | 0.263386  |
| 1 | -3.242897 | -0.468917 | -1.791257 |
| 1 | -3.406683 | 1.952766  | -1.160949 |
| 1 | -4.340418 | 1.517753  | 0.255689  |
| 1 | -4.488565 | -2.186685 | -0.537217 |
| 1 | -5.088042 | -0.970148 | 0.585447  |
| 1 | -0.503101 | -0.319141 | 2.190913  |
| 1 | -5.139155 | 0.863135  | -2.689594 |
| 1 | -5.634894 | -0.817005 | -2.412694 |
| 1 | -6.121504 | 0.450842  | -1.27592  |
| 1 | -0.720534 | 1.00062   | 4.279994  |
| 1 | -1.423991 | 1.960942  | 2.970757  |
| 1 | -2.473842 | 1.084134  | 4.080963  |
| 1 | -2.713907 | -1.487507 | 3.955679  |
| 1 | -0.999979 | -1.44031  | 4.37854   |
| 1 | -1.543271 | -2.403605 | 2.998319  |

|    |           |           |           |
|----|-----------|-----------|-----------|
| 6  | 0.71579   | 1.797685  | -0.207675 |
| 6  | 1.13438   | 1.880935  | 1.139338  |
| 6  | 1.59344   | 2.315837  | -1.195908 |
| 6  | 2.352244  | 2.489202  | 1.482496  |
| 1  | 0.494192  | 1.504779  | 1.926432  |
| 6  | 2.804601  | 2.91833   | -0.847737 |
| 1  | 1.281434  | 2.29255   | -2.236029 |
| 6  | 3.183408  | 3.017507  | 0.494743  |
| 1  | 2.642805  | 2.545764  | 2.527307  |
| 1  | 3.446915  | 3.315693  | -1.627154 |
| 1  | 4.127176  | 3.480179  | 0.76401   |
| 17 | -1.376963 | 3.620043  | -1.070352 |
| 6  | -2.54369  | -0.113741 | 1.497498  |
| 1  | -3.44924  | 0.27417   | 1.997342  |
| 15 | -0.847966 | 1.027636  | -0.917312 |
| 12 | 1.967423  | -0.127608 | -0.272495 |
| 35 | 4.232505  | -0.797118 | -0.405203 |
| 6  | -0.06078  | -1.034839 | -1.048756 |
| 6  | 0.393928  | -2.044188 | -0.169263 |
| 6  | -0.539054 | -1.511029 | -2.287901 |
| 6  | 0.320665  | -3.411282 | -0.434957 |
| 6  | -0.615851 | -2.869452 | -2.600996 |
| 1  | -0.895339 | -0.779621 | -3.009712 |
| 6  | -0.20879  | -3.818834 | -1.661893 |
| 1  | 0.67917   | -4.149449 | 0.273073  |
| 1  | -1.002108 | -3.185242 | -3.565205 |
| 1  | -0.280072 | -4.879237 | -1.884515 |
| 8  | 1.052975  | -1.538432 | 0.971447  |
| 6  | 1.68155   | -2.444294 | 1.900897  |
| 1  | 2.462878  | -3.02285  | 1.401466  |

|   |          |           |          |
|---|----------|-----------|----------|
| 1 | 2.124866 | -1.815401 | 2.672146 |
| 1 | 0.926588 | -3.096914 | 2.345254 |

**PC<sub>1b-i</sub> 3**

E = -4543.871345    ZPVE = 0.491286    NIMAG = 0.

|   |           |           |           |
|---|-----------|-----------|-----------|
| 6 | -2.385421 | 0.715817  | 0.072794  |
| 6 | -3.642348 | -1.447136 | 0.561999  |
| 6 | -4.342865 | -0.005239 | -1.446706 |
| 6 | -3.571428 | 1.165788  | -0.81843  |
| 6 | -4.790255 | -0.995468 | -0.35826  |
| 6 | -1.866881 | -0.545823 | 2.289268  |
| 6 | -5.526455 | 0.486214  | -2.289478 |
| 6 | -1.694142 | 0.671929  | 3.219227  |
| 6 | -2.201223 | -1.785722 | 3.136973  |
| 1 | -1.983728 | 1.631673  | 0.522868  |
| 1 | -4.058864 | -2.079162 | 1.352875  |
| 1 | -2.939003 | -2.078157 | 0.004087  |
| 1 | -3.651564 | -0.536215 | -2.12164  |
| 1 | -3.220049 | 1.855679  | -1.594071 |
| 1 | -4.249774 | 1.752752  | -0.18309  |
| 1 | -5.263803 | -1.871459 | -0.82127  |
| 1 | -5.56599  | -0.513887 | 0.256344  |
| 1 | -0.907637 | -0.737417 | 1.796114  |
| 1 | -5.193412 | 1.159716  | -3.087029 |
| 1 | -6.058447 | -0.351453 | -2.755785 |
| 1 | -6.246442 | 1.035266  | -1.670001 |
| 1 | -0.851018 | 0.527929  | 3.906381  |
| 1 | -1.5388   | 1.611426  | 2.679161  |

|    |           |           |           |
|----|-----------|-----------|-----------|
| 1  | -2.592584 | 0.806746  | 3.834257  |
| 1  | -3.184408 | -1.687891 | 3.613494  |
| 1  | -1.465811 | -1.904402 | 3.941992  |
| 1  | -2.203258 | -2.708893 | 2.549277  |
| 6  | 0.408543  | 1.33493   | -0.834059 |
| 6  | 0.665438  | 2.024923  | 0.38443   |
| 6  | 1.249483  | 1.606951  | -1.941526 |
| 6  | 1.832511  | 2.813211  | 0.513099  |
| 1  | 0.087521  | 1.802563  | 1.266542  |
| 6  | 2.375086  | 2.439762  | -1.827856 |
| 1  | 1.026473  | 1.138253  | -2.896454 |
| 6  | 2.673078  | 3.031468  | -0.586001 |
| 1  | 2.034672  | 3.298491  | 1.46169   |
| 1  | 3.020175  | 2.602992  | -2.684097 |
| 1  | 3.557591  | 3.65023   | -0.476296 |
| 17 | -1.163338 | 4.012944  | 0.691908  |
| 6  | -2.91127  | -0.237163 | 1.180152  |
| 1  | -3.698438 | 0.354333  | 1.677875  |
| 15 | -1.020471 | 0.186927  | -1.170463 |
| 12 | 2.544362  | 0.489692  | -0.122611 |
| 35 | 4.701959  | -0.459052 | -0.125541 |
| 6  | -0.269479 | -1.498591 | -0.826345 |
| 6  | 0.78488   | -1.884314 | 0.024917  |
| 6  | -0.776407 | -2.510962 | -1.668358 |
| 6  | 1.307136  | -3.179475 | 0.033162  |
| 6  | -0.301272 | -3.820557 | -1.644997 |
| 1  | -1.566926 | -2.245743 | -2.364552 |
| 6  | 0.753921  | -4.154597 | -0.795437 |
| 1  | 2.148793  | -3.424689 | 0.670278  |
| 1  | -0.736468 | -4.566198 | -2.302901 |

|   |          |           |           |
|---|----------|-----------|-----------|
| 1 | 1.159261 | -5.161378 | -0.783131 |
| 8 | 1.362172 | -0.908636 | 0.869878  |
| 6 | 1.81108  | -1.33742  | 2.185637  |
| 1 | 2.785311 | -1.825502 | 2.117701  |
| 1 | 1.889613 | -0.42922  | 2.785851  |
| 1 | 1.062262 | -2.001892 | 2.619055  |

**R1<sub>II</sub> + b S<sub>N2</sub>@P-b pathways 2 and 3 in the gas phase**

**RC<sub>IIb-i</sub> 2**

E = -4235.421739      ZPVE = 0.370945      NIMAG = 0.

|    |           |           |           |
|----|-----------|-----------|-----------|
| 15 | -1.552059 | -0.388426 | -0.068136 |
| 17 | -3.09579  | 0.617821  | -1.072493 |
| 6  | -2.048579 | -0.150503 | 1.758477  |
| 6  | -0.950122 | -0.804817 | 2.627651  |
| 1  | -1.135053 | -0.535816 | 3.674731  |
| 1  | -0.956131 | -1.89489  | 2.565753  |
| 1  | 0.051656  | -0.447716 | 2.368348  |
| 6  | -3.431977 | -0.701228 | 2.136961  |
| 1  | -3.677634 | -0.373584 | 3.154727  |
| 1  | -4.216579 | -0.330674 | 1.471232  |
| 1  | -3.455718 | -1.793949 | 2.132035  |
| 6  | -2.013273 | 1.378086  | 1.99832   |
| 1  | -2.136001 | 1.565292  | 3.07171   |
| 1  | -1.068065 | 1.829383  | 1.679445  |
| 1  | -2.817784 | 1.894048  | 1.469028  |
| 12 | 0.83931   | 0.784606  | -0.662534 |
| 35 | 0.25495   | 3.096429  | -0.953905 |
| 6  | 2.373089  | -0.674367 | -0.79243  |
| 6  | 3.072516  | -1.685429 | -1.468022 |

|   |           |           |           |
|---|-----------|-----------|-----------|
| 6 | 2.863759  | -0.364396 | 0.480957  |
| 6 | 4.196785  | -2.310188 | -0.906698 |
| 6 | 3.973037  | -0.946569 | 1.089272  |
| 6 | 4.646226  | -1.93876  | 0.36397   |
| 1 | 4.727087  | -3.080385 | -1.461047 |
| 1 | 4.312499  | -0.659834 | 2.080191  |
| 1 | 5.519072  | -2.41862  | 0.797548  |
| 6 | -1.763325 | -2.162226 | -0.743722 |
| 6 | -3.194571 | -2.722263 | -0.698985 |
| 1 | -3.206505 | -3.693409 | -1.209005 |
| 1 | -3.54661  | -2.884199 | 0.321866  |
| 1 | -3.906263 | -2.069567 | -1.210826 |
| 6 | -1.295007 | -2.068647 | -2.21624  |
| 1 | -0.256523 | -1.729703 | -2.291307 |
| 1 | -1.34763  | -3.067249 | -2.666381 |
| 1 | -1.928606 | -1.402889 | -2.808925 |
| 6 | -0.798854 | -3.093148 | 0.023121  |
| 1 | 0.216075  | -2.687293 | 0.084147  |
| 1 | -1.155107 | -3.313331 | 1.03256   |
| 1 | -0.735773 | -4.046585 | -0.514951 |
| 8 | 2.059515  | 0.624097  | 1.126577  |
| 6 | 2.688046  | 1.597741  | 1.973257  |
| 1 | 3.551213  | 2.041107  | 1.466178  |
| 1 | 1.938878  | 2.366853  | 2.164815  |
| 1 | 3.003286  | 1.142517  | 2.917339  |
| 1 | 2.757957  | -1.988848 | -2.46567  |

**TS<sub>nb-i</sub> 2**

E = -4235.356037    ZPVE = 0.371328    NIMAG = 1.

|    |           |           |           |
|----|-----------|-----------|-----------|
| 15 | 1.268113  | -0.365474 | -0.13985  |
| 17 | 2.425508  | -2.506514 | -0.486986 |
| 6  | 1.612994  | -0.142875 | 1.756992  |
| 6  | 1.968806  | 1.306377  | 2.147171  |
| 1  | 2.010597  | 1.363808  | 3.242884  |
| 1  | 2.955836  | 1.593084  | 1.776513  |
| 1  | 1.230379  | 2.028126  | 1.804454  |
| 6  | 2.739522  | -1.06318  | 2.272856  |
| 1  | 2.865389  | -0.860204 | 3.344247  |
| 1  | 2.50551   | -2.119513 | 2.143869  |
| 1  | 3.694284  | -0.874039 | 1.779539  |
| 6  | 0.29814   | -0.572075 | 2.446185  |
| 1  | 0.42433   | -0.514223 | 3.534477  |
| 1  | -0.539316 | 0.083352  | 2.190651  |
| 1  | 0.048506  | -1.617857 | 2.224339  |
| 12 | -1.019131 | -1.1701   | -0.349235 |
| 35 | -2.938814 | -2.431411 | 0.120368  |
| 6  | -0.576918 | 1.112698  | -0.445897 |
| 6  | -1.026992 | 0.827358  | -1.752036 |
| 6  | -1.314561 | 2.115191  | 0.235626  |
| 6  | -2.096119 | 1.479912  | -2.386368 |
| 6  | -2.386879 | 2.785141  | -0.373408 |
| 6  | -2.768571 | 2.471598  | -1.682666 |
| 1  | -2.386384 | 1.213887  | -3.397929 |
| 1  | -2.9435   | 3.544598  | 0.163307  |
| 1  | -3.604719 | 2.998122  | -2.133157 |
| 6  | 2.516448  | 0.640439  | -1.251307 |
| 6  | 3.962843  | 0.413693  | -0.759274 |
| 1  | 4.637479  | 0.919526  | -1.460843 |



|   |           |           |           |
|---|-----------|-----------|-----------|
| 1 | 4.13889   | 0.847765  | 0.227418  |
| 1 | 4.227007  | -0.64407  | -0.734932 |
| 6 | 2.400411  | 0.102115  | -2.693704 |
| 1 | 1.430166  | 0.330193  | -3.143102 |
| 1 | 3.162358  | 0.595391  | -3.309832 |
| 1 | 2.571727  | -0.975325 | -2.737113 |
| 6 | 2.232244  | 2.156061  | -1.251874 |
| 1 | 1.26579   | 2.399469  | -1.694246 |
| 1 | 2.270995  | 2.591465  | -0.251838 |
| 1 | 3.009078  | 2.641789  | -1.855992 |
| 8 | -0.934176 | 2.385819  | 1.521165  |
| 6 | -1.669812 | 3.335129  | 2.288412  |
| 1 | -2.717693 | 3.031747  | 2.398993  |
| 1 | -1.192764 | 3.353729  | 3.269012  |
| 1 | -1.619921 | 4.335517  | 1.842058  |
| 1 | -0.4872   | 0.075077  | -2.341883 |

**PC<sub>IIb-i</sub> 2**

E = -4235.475300    ZPVE = 0.373233    NIMAG = 0.

|    |           |          |           |
|----|-----------|----------|-----------|
| 15 | -0.200191 | 0.633091 | 0.054988  |
| 17 | 3.438316  | 1.701605 | -1.520588 |
| 6  | -0.328521 | 0.806207 | 1.967126  |
| 6  | -1.436472 | 1.736255 | 2.492647  |
| 1  | -1.415613 | 1.715945 | 3.589681  |
| 1  | -1.288108 | 2.775348 | 2.187012  |
| 1  | -2.423904 | 1.411265 | 2.166224  |
| 6  | 1.043407  | 1.348732 | 2.438819  |
| 1  | 1.020403  | 1.490282 | 3.526023  |

|    |           |           |           |
|----|-----------|-----------|-----------|
| 1  | 1.853536  | 0.637081  | 2.236308  |
| 1  | 1.295135  | 2.31462   | 1.990103  |
| 6  | -0.518532 | -0.610266 | 2.550778  |
| 1  | -0.403462 | -0.557519 | 3.640503  |
| 1  | -1.514065 | -1.004205 | 2.335151  |
| 1  | 0.227539  | -1.316132 | 2.173653  |
| 12 | 2.330346  | 0.117697  | -0.371036 |
| 35 | 2.870161  | -1.977556 | 0.64692   |
| 6  | -1.234395 | -0.778316 | -0.544976 |
| 6  | -0.586466 | -1.706532 | -1.376871 |
| 6  | -2.608159 | -0.993579 | -0.276179 |
| 6  | -1.255228 | -2.784118 | -1.959441 |
| 6  | -3.285905 | -2.075823 | -0.852427 |
| 6  | -2.610152 | -2.961834 | -1.694727 |
| 1  | -0.715454 | -3.477373 | -2.59557  |
| 1  | -4.337035 | -2.237336 | -0.648147 |
| 1  | -3.15156  | -3.795234 | -2.132557 |
| 6  | -0.763892 | 2.187305  | -0.914234 |
| 6  | 0.08214   | 3.391245  | -0.446182 |
| 1  | -0.153506 | 4.252052  | -1.083667 |
| 1  | -0.140154 | 3.682092  | 0.584234  |
| 1  | 1.155685  | 3.203665  | -0.540633 |
| 6  | -0.429318 | 1.89387   | -2.395294 |
| 1  | -0.98374  | 1.03082   | -2.776675 |
| 1  | -0.714762 | 2.764123  | -2.998752 |
| 1  | 0.640812  | 1.727515  | -2.550802 |
| 6  | -2.261617 | 2.525729  | -0.807028 |
| 1  | -2.888618 | 1.71716   | -1.188727 |
| 1  | -2.572464 | 2.745023  | 0.215461  |
| 1  | -2.458513 | 3.41728   | -1.415904 |

|   |           |           |           |
|---|-----------|-----------|-----------|
| 8 | -3.216107 | -0.113423 | 0.572037  |
| 6 | -4.603161 | -0.2694   | 0.862532  |
| 1 | -4.802059 | -1.229302 | 1.353048  |
| 1 | -4.855279 | 0.543848  | 1.544168  |
| 1 | -5.211825 | -0.184692 | -0.045332 |
| 1 | 0.475204  | -1.597349 | -1.572945 |

### RC<sub>nb-i</sub> 3

E = -4235.421339    ZPVE = 0.370731    NIMAG = 0.

|    |           |           |           |
|----|-----------|-----------|-----------|
| 15 | 1.510678  | -0.404708 | 0.14795   |
| 17 | 2.820385  | 0.755462  | 1.306623  |
| 6  | -4.138287 | -1.033055 | 0.526607  |
| 6  | -2.953998 | -0.367126 | 0.222754  |
| 6  | -2.31235  | -0.365287 | -1.021168 |
| 6  | -2.943993 | -1.124607 | -2.015871 |
| 6  | -4.135658 | -1.825001 | -1.769024 |
| 6  | -4.73031  | -1.774835 | -0.505623 |
| 1  | -4.597539 | -0.993156 | 1.509654  |
| 1  | -4.605629 | -2.399967 | -2.562849 |
| 1  | -5.656438 | -2.309672 | -0.3149   |
| 12 | -0.799382 | 0.961607  | -0.34572  |
| 35 | -0.083326 | 3.244483  | -0.187087 |
| 1  | -2.516064 | -1.170596 | -3.016342 |
| 8  | -2.220168 | 0.393273  | 1.18165   |
| 6  | -2.9052   | 0.995807  | 2.285867  |
| 1  | -2.190971 | 1.669283  | 2.760774  |
| 1  | -3.770518 | 1.564829  | 1.930133  |
| 1  | -3.227224 | 0.233477  | 3.002502  |

|   |           |           |           |
|---|-----------|-----------|-----------|
| 6 | 1.34318   | -1.980473 | 1.210749  |
| 6 | 0.308859  | -2.902614 | 0.524947  |
| 1 | -0.619945 | -2.379494 | 0.278704  |
| 1 | 0.695787  | -3.359724 | -0.388108 |
| 1 | 0.058102  | -3.715905 | 1.216499  |
| 6 | 0.750092  | -1.501829 | 2.557933  |
| 1 | -0.172213 | -0.92884  | 2.418064  |
| 1 | 0.50566   | -2.38329  | 3.162745  |
| 1 | 1.45692   | -0.890928 | 3.124369  |
| 6 | 2.652951  | -2.741974 | 1.467681  |
| 1 | 3.030734  | -3.225167 | 0.563023  |
| 1 | 3.434466  | -2.09106  | 1.870125  |
| 1 | 2.465592  | -3.5326   | 2.204906  |
| 6 | 2.515922  | -0.629524 | -1.45938  |
| 6 | 3.985522  | -1.039881 | -1.268365 |
| 1 | 4.088584  | -2.036548 | -0.834967 |
| 1 | 4.475019  | -1.054192 | -2.249967 |
| 1 | 4.527688  | -0.33105  | -0.637616 |
| 6 | 2.460872  | 0.752367  | -2.153926 |
| 1 | 2.915857  | 1.539411  | -1.547154 |
| 1 | 3.011361  | 0.690387  | -3.100296 |
| 1 | 1.438079  | 1.065324  | -2.387189 |
| 6 | 1.783301  | -1.663444 | -2.342168 |
| 1 | 1.92779   | -2.685968 | -1.984521 |
| 1 | 0.70748   | -1.470239 | -2.415257 |
| 1 | 2.195617  | -1.610071 | -3.356747 |

**TS<sub>nb-i</sub> 3**

E = -4235.363210    ZPVE = 0.369212    NIMAG = 1.

|    |           |           |           |
|----|-----------|-----------|-----------|
| 15 | -1.458399 | -0.303596 | 0.160083  |
| 17 | -0.515548 | -2.591208 | 1.183174  |
| 6  | 1.778918  | 3.101605  | 0.304075  |
| 6  | 1.322728  | 1.786897  | 0.278469  |
| 6  | 0.719016  | 1.17519   | -0.832072 |
| 6  | 0.526726  | 1.998454  | -1.949837 |
| 6  | 0.942505  | 3.338184  | -1.964829 |
| 6  | 1.566227  | 3.883751  | -0.840696 |
| 1  | 2.281273  | 3.525368  | 1.167811  |
| 1  | 0.794038  | 3.947873  | -2.852136 |
| 1  | 1.899066  | 4.917571  | -0.847264 |
| 12 | 1.082797  | -0.844164 | 0.19672   |
| 35 | 3.257291  | -1.69791  | -0.335636 |
| 1  | 0.064867  | 1.594175  | -2.849895 |
| 8  | 1.474098  | 0.897768  | 1.371212  |
| 6  | 2.516895  | 1.138512  | 2.331673  |
| 1  | 2.536047  | 0.265863  | 2.984669  |
| 1  | 3.479508  | 1.243543  | 1.823614  |
| 1  | 2.290736  | 2.03113   | 2.92209   |
| 6  | -2.688123 | 0.696361  | 1.229135  |
| 6  | -2.67323  | 2.159485  | 0.715505  |
| 1  | -1.660659 | 2.569103  | 0.663636  |
| 1  | -3.134626 | 2.262683  | -0.269265 |
| 1  | -3.248763 | 2.773534  | 1.420441  |
| 6  | -2.062082 | 0.655504  | 2.644279  |
| 1  | -1.036618 | 1.037075  | 2.643713  |
| 1  | -2.658129 | 1.284496  | 3.316898  |
| 1  | -2.045395 | -0.359954 | 3.051133  |
| 6  | -4.130942 | 0.168217  | 1.299809  |

|   |           |           |           |
|---|-----------|-----------|-----------|
| 1 | -4.653904 | 0.239629  | 0.343593  |
| 1 | -4.171248 | -0.868804 | 1.645634  |
| 1 | -4.688577 | 0.777873  | 2.022592  |
| 6 | -2.289434 | -0.944733 | -1.43368  |
| 6 | -3.301593 | -2.0751   | -1.133234 |
| 1 | -4.175702 | -1.726659 | -0.581559 |
| 1 | -3.654198 | -2.477777 | -2.091155 |
| 1 | -2.83727  | -2.891935 | -0.57523  |
| 6 | -1.150264 | -1.532891 | -2.300045 |
| 1 | -0.667369 | -2.383437 | -1.808787 |
| 1 | -1.576766 | -1.903453 | -3.240049 |
| 1 | -0.388799 | -0.788391 | -2.548009 |
| 6 | -2.980378 | 0.19866   | -2.209426 |
| 1 | -3.856727 | 0.588481  | -1.686189 |
| 1 | -2.299877 | 1.029498  | -2.415643 |
| 1 | -3.323935 | -0.196914 | -3.173665 |

**PC<sub>III-i</sub> 3**

E = -4235.495754    ZPVE = 0.373820    NIMAG = 0.

|    |           |           |           |
|----|-----------|-----------|-----------|
| 15 | 0.935874  | -0.567341 | 0.06965   |
| 17 | -2.1106   | -1.892654 | -2.347353 |
| 6  | 0.037041  | 3.406051  | -0.619996 |
| 6  | 0.018498  | 2.00933   | -0.594008 |
| 6  | 1.078538  | 1.274722  | -0.012929 |
| 6  | 2.159311  | 2.003246  | 0.506894  |
| 6  | 2.198783  | 3.397757  | 0.469551  |
| 6  | 1.13038   | 4.094981  | -0.091569 |
| 1  | -0.785163 | 3.964922  | -1.047709 |

|    |           |           |           |
|----|-----------|-----------|-----------|
| 1  | 3.050549  | 3.92959   | 0.881204  |
| 1  | 1.136447  | 5.180265  | -0.12018  |
| 12 | -1.594292 | -0.691275 | -0.493863 |
| 35 | -2.940954 | -0.114701 | 1.424483  |
| 1  | 2.988447  | 1.469124  | 0.956822  |
| 8  | -1.031611 | 1.289567  | -1.147315 |
| 6  | -2.124298 | 1.997086  | -1.776065 |
| 1  | -2.76714  | 1.224161  | -2.198377 |
| 1  | -2.672873 | 2.582542  | -1.034173 |
| 1  | -1.744707 | 2.630106  | -2.581805 |
| 6  | 2.13699   | -1.213293 | -1.274734 |
| 6  | 3.587987  | -0.71502  | -1.144148 |
| 1  | 3.6475    | 0.376344  | -1.183612 |
| 1  | 4.077444  | -1.057713 | -0.230895 |
| 1  | 4.167791  | -1.102273 | -1.991365 |
| 6  | 1.566909  | -0.713814 | -2.622259 |
| 1  | 1.56873   | 0.379228  | -2.684176 |
| 1  | 2.205488  | -1.088822 | -3.431536 |
| 1  | 0.551519  | -1.076625 | -2.803963 |
| 6  | 2.096935  | -2.755554 | -1.261949 |
| 1  | 2.54029   | -3.177348 | -0.35517  |
| 1  | 1.076238  | -3.136682 | -1.365759 |
| 1  | 2.676551  | -3.132212 | -2.113365 |
| 6  | 1.378587  | -1.1205   | 1.853766  |
| 6  | 0.651403  | -2.472248 | 2.059145  |
| 1  | 0.985142  | -3.242112 | 1.357618  |
| 1  | 0.857132  | -2.837954 | 3.072427  |
| 1  | -0.433079 | -2.361003 | 1.963435  |
| 6  | 0.772571  | -0.094706 | 2.836451  |
| 1  | -0.285204 | 0.096805  | 2.63386   |

|   |          |           |          |
|---|----------|-----------|----------|
| 1 | 0.845243 | -0.504703 | 3.85126  |
| 1 | 1.306355 | 0.858625  | 2.822469 |
| 6 | 2.876577 | -1.302414 | 2.159319 |
| 1 | 3.331917 | -2.094219 | 1.55881  |
| 1 | 3.453532 | -0.384748 | 2.015208 |
| 1 | 2.984453 | -1.590511 | 3.212364 |

**R1<sub>III</sub> + b S<sub>N2</sub>@P-b pathway 2 in the gas phase**

**R1<sub>IIIb-i</sub> 2**

E = -1264.903326      ZPVE = 0.183787      NIMAG = 0.

|    |           |           |           |
|----|-----------|-----------|-----------|
| 15 | 0.063678  | 1.068272  | 0.893116  |
| 6  | -1.442016 | 0.136885  | 0.352956  |
| 6  | -2.137072 | 0.322641  | -0.850194 |
| 6  | -1.919391 | -0.811008 | 1.275273  |
| 6  | -3.276856 | -0.436791 | -1.131042 |
| 1  | -1.796248 | 1.065993  | -1.563155 |
| 6  | -3.050588 | -1.576726 | 0.987645  |
| 1  | -1.408357 | -0.951053 | 2.225401  |
| 6  | -3.733205 | -1.390349 | -0.217914 |
| 1  | -3.807592 | -0.280036 | -2.065901 |
| 1  | -3.404264 | -2.307684 | 1.709017  |
| 1  | -4.619918 | -1.977317 | -0.438929 |
| 17 | 0.123111  | 2.645114  | -0.539789 |
| 6  | 1.424052  | -0.010708 | 0.260035  |
| 6  | 1.313835  | -0.874059 | -0.842267 |
| 6  | 2.642977  | 0.055451  | 0.955452  |
| 6  | 2.402767  | -1.649535 | -1.24145  |
| 1  | 0.376712  | -0.94349  | -1.385522 |
| 6  | 3.733905  | -0.71977  | 0.553698  |



|   |          |           |           |
|---|----------|-----------|-----------|
| 1 | 2.737676 | 0.715792  | 1.813848  |
| 6 | 3.614292 | -1.572833 | -0.545629 |
| 1 | 2.306943 | -2.314608 | -2.095006 |
| 1 | 4.67117  | -0.658813 | 1.099086  |
| 1 | 4.459612 | -2.178999 | -0.858549 |

**RC<sub>mb-i</sub> 2**

E = -4383.012221    ZPVE = 0.307512    NIMAG = 0.

|    |           |           |           |
|----|-----------|-----------|-----------|
| 15 | 1.544664  | 1.316197  | 0.097987  |
| 6  | 1.370033  | 0.111856  | 1.482338  |
| 6  | 1.234038  | -1.280699 | 1.355403  |
| 6  | 1.347946  | 0.687692  | 2.764998  |
| 6  | 1.069988  | -2.077873 | 2.490447  |
| 1  | 1.225539  | -1.751275 | 0.377655  |
| 6  | 1.221127  | -0.117196 | 3.899503  |
| 1  | 1.418008  | 1.76684   | 2.877934  |
| 6  | 1.081577  | -1.500857 | 3.763257  |
| 1  | 0.937991  | -3.148928 | 2.372568  |
| 1  | 1.210402  | 0.339232  | 4.884865  |
| 1  | 0.960169  | -2.124421 | 4.644105  |
| 17 | 0.462136  | 0.228251  | -1.470215 |
| 6  | -4.281875 | 2.243733  | -0.522345 |
| 6  | -3.39997  | 1.169534  | -0.457953 |
| 6  | -2.685041 | 0.768194  | 0.676631  |
| 6  | -2.908883 | 1.532887  | 1.826407  |
| 6  | -3.785109 | 2.631597  | 1.824706  |
| 6  | -4.465548 | 2.981743  | 0.65737   |
| 1  | -4.81407  | 2.516446  | -1.428051 |

|    |           |           |           |
|----|-----------|-----------|-----------|
| 1  | -3.939726 | 3.208738  | 2.732684  |
| 1  | -5.145503 | 3.829176  | 0.653338  |
| 12 | -1.743118 | -0.820231 | -0.337151 |
| 35 | -1.2786   | -3.118089 | -0.84047  |
| 1  | -2.39395  | 1.281125  | 2.751996  |
| 8  | -3.110974 | 0.317432  | -1.5595   |
| 6  | -3.770152 | 0.50191   | -2.811158 |
| 1  | -3.40683  | -0.288813 | -3.468263 |
| 1  | -4.855067 | 0.411753  | -2.689443 |
| 1  | -3.522477 | 1.481048  | -3.23561  |
| 6  | 3.256253  | 1.046009  | -0.518576 |
| 6  | 4.021179  | -0.115587 | -0.319374 |
| 6  | 3.824277  | 2.127314  | -1.216552 |
| 6  | 5.319585  | -0.196804 | -0.821916 |
| 1  | 3.606724  | -0.954608 | 0.228498  |
| 6  | 5.123296  | 2.042647  | -1.721617 |
| 1  | 3.24614   | 3.035726  | -1.36622  |
| 6  | 5.871773  | 0.879863  | -1.524217 |
| 1  | 5.901921  | -1.099843 | -0.664172 |
| 1  | 5.549779  | 2.882827  | -2.261467 |
| 1  | 6.883907  | 0.812408  | -1.912423 |

**TS<sub>imb-i</sub> 2**

E = -4382.974169      ZPVE = 0.306602      NIMAG = 1.

|    |          |           |           |
|----|----------|-----------|-----------|
| 15 | 1.205575 | 0.055178  | -0.517356 |
| 6  | 1.695323 | -1.568203 | 0.186634  |
| 6  | 1.094784 | -2.776756 | -0.218853 |
| 6  | 2.591354 | -1.594306 | 1.279761  |

|    |           |           |           |
|----|-----------|-----------|-----------|
| 6  | 1.393795  | -3.970539 | 0.438045  |
| 1  | 0.412426  | -2.782951 | -1.060562 |
| 6  | 2.865926  | -2.787527 | 1.947406  |
| 1  | 3.056278  | -0.677753 | 1.62747   |
| 6  | 2.272373  | -3.980184 | 1.525043  |
| 1  | 0.934079  | -4.894258 | 0.099793  |
| 1  | 3.546225  | -2.78375  | 2.79398   |
| 1  | 2.494147  | -4.911005 | 2.038753  |
| 17 | -0.519736 | -0.87349  | -2.504564 |
| 6  | -1.576703 | 2.622048  | 2.045333  |
| 6  | -1.503802 | 1.670335  | 1.033624  |
| 6  | -1.039642 | 0.350518  | 1.19675   |
| 6  | -0.583137 | 0.032796  | 2.487219  |
| 6  | -0.610097 | 0.962294  | 3.537124  |
| 6  | -1.105932 | 2.249206  | 3.314143  |
| 1  | -1.977461 | 3.617482  | 1.882164  |
| 1  | -0.258337 | 0.681842  | 4.526419  |
| 1  | -1.136363 | 2.971399  | 4.125099  |
| 12 | -1.981312 | -0.245565 | -0.694132 |
| 35 | -4.31009  | -0.830826 | -0.740068 |
| 1  | -0.201475 | -0.966731 | 2.68909   |
| 8  | -1.94226  | 1.899649  | -0.285935 |
| 6  | -2.840212 | 2.98366   | -0.558059 |
| 1  | -3.149744 | 2.867833  | -1.596644 |
| 1  | -3.715172 | 2.926088  | 0.09654   |
| 1  | -2.329738 | 3.943757  | -0.43081  |
| 6  | 2.848045  | 0.834484  | -0.693493 |
| 6  | 4.078786  | 0.170836  | -0.904616 |
| 6  | 2.822012  | 2.247666  | -0.763002 |
| 6  | 5.240192  | 0.898621  | -1.149873 |

|   |          |           |           |
|---|----------|-----------|-----------|
| 1 | 4.117817 | -0.912844 | -0.88621  |
| 6 | 3.990781 | 2.973733  | -0.978595 |
| 1 | 1.876812 | 2.769735  | -0.636332 |
| 6 | 5.199747 | 2.298381  | -1.177385 |
| 1 | 6.177844 | 0.378899  | -1.323142 |
| 1 | 3.960327 | 4.058599  | -1.007634 |
| 1 | 6.109648 | 2.861475  | -1.363824 |

**PC<sub>nv-i</sub> 2**

E = -4383.098363      ZPVE = 0.310816      NIMAG = 0.

|    |           |           |           |
|----|-----------|-----------|-----------|
| 15 | -0.620981 | 0.070375  | -0.205813 |
| 6  | -1.344542 | 1.738556  | -0.463753 |
| 6  | -0.465468 | 2.783516  | -0.801572 |
| 6  | -2.721545 | 1.993355  | -0.377952 |
| 6  | -0.964032 | 4.068052  | -1.02334  |
| 1  | 0.602057  | 2.594229  | -0.883439 |
| 6  | -3.213745 | 3.280639  | -0.610991 |
| 1  | -3.412275 | 1.190861  | -0.139521 |
| 6  | -2.336055 | 4.320104  | -0.927772 |
| 1  | -0.277367 | 4.869513  | -1.27882  |
| 1  | -4.281758 | 3.467389  | -0.545722 |
| 1  | -2.719457 | 5.320104  | -1.108927 |
| 17 | 1.575497  | -2.471285 | -2.606972 |
| 6  | 1.628035  | -0.805203 | 3.124421  |
| 6  | 1.084654  | -0.769086 | 1.841678  |
| 6  | 0.005796  | 0.083149  | 1.528674  |
| 6  | -0.486195 | 0.924362  | 2.533269  |
| 6  | 0.049805  | 0.899252  | 3.823234  |

|    |           |           |           |
|----|-----------|-----------|-----------|
| 6  | 1.099651  | 0.029256  | 4.114245  |
| 1  | 2.460701  | -1.456124 | 3.359933  |
| 1  | -0.347596 | 1.557026  | 4.589545  |
| 1  | 1.52814   | 0.002795  | 5.111451  |
| 12 | 1.661549  | -0.707365 | -1.199678 |
| 35 | 3.097557  | 1.198074  | -0.875523 |
| 1  | -1.292348 | 1.612713  | 2.298185  |
| 8  | 1.570824  | -1.555974 | 0.802559  |
| 6  | 2.482311  | -2.636809 | 1.101277  |
| 1  | 2.615246  | -3.168624 | 0.158806  |
| 1  | 3.439634  | -2.244969 | 1.455691  |
| 1  | 2.033517  | -3.299361 | 1.845829  |
| 6  | -2.01629  | -1.125132 | -0.21246  |
| 6  | -2.264647 | -1.818758 | -1.408543 |
| 6  | -2.82136  | -1.379852 | 0.909535  |
| 6  | -3.318326 | -2.732137 | -1.487158 |
| 1  | -1.623447 | -1.664219 | -2.271566 |
| 6  | -3.869787 | -2.298945 | 0.828866  |
| 1  | -2.626626 | -0.870483 | 1.848308  |
| 6  | -4.122654 | -2.9721   | -0.370357 |
| 1  | -3.497953 | -3.265154 | -2.415875 |
| 1  | -4.485693 | -2.490688 | 1.70282   |
| 1  | -4.936811 | -3.688535 | -0.429813 |

**Результат 2**

E = -1150.877424    ZPVE = 0.305833    NIMAG = 0.

|    |          |           |           |
|----|----------|-----------|-----------|
| 15 | 0.203951 | 0.017404  | -1.044332 |
| 6  | 1.911532 | -0.457265 | -0.485859 |

|   |           |           |           |
|---|-----------|-----------|-----------|
| 6 | 2.593016  | -1.405177 | -1.26943  |
| 6 | 2.572948  | 0.091101  | 0.624793  |
| 6 | 3.888031  | -1.812606 | -0.940351 |
| 1 | 2.105185  | -1.823744 | -2.14649  |
| 6 | 3.874044  | -0.305263 | 0.947926  |
| 1 | 2.074098  | 0.834355  | 1.238709  |
| 6 | 4.533536  | -1.260723 | 0.169905  |
| 1 | 4.395309  | -2.549869 | -1.556444 |
| 1 | 4.371205  | 0.133138  | 1.809025  |
| 1 | 5.544622  | -1.567435 | 0.422432  |
| 6 | -3.105073 | -2.001137 | 0.377718  |
| 6 | -2.251668 | -1.095799 | -0.262598 |
| 6 | -0.853067 | -1.136606 | -0.046948 |
| 6 | -0.352855 | -2.112955 | 0.82225   |
| 6 | -1.197941 | -3.025463 | 1.465076  |
| 6 | -2.571276 | -2.965161 | 1.240319  |
| 1 | -4.175401 | -1.965036 | 0.212731  |
| 1 | -0.78065  | -3.771755 | 2.134151  |
| 1 | -3.239872 | -3.665784 | 1.732427  |
| 1 | 0.716079  | -2.165082 | 1.000119  |
| 8 | -2.683213 | -0.120188 | -1.115494 |
| 6 | -4.069444 | -0.019811 | -1.4141   |
| 1 | -4.160567 | 0.807934  | -2.118287 |
| 1 | -4.44504  | -0.939131 | -1.880444 |
| 1 | -4.656207 | 0.20176   | -0.513938 |
| 6 | -0.048359 | 1.6435    | -0.18589  |
| 6 | 0.334461  | 2.800523  | -0.885196 |
| 6 | -0.609477 | 1.78839   | 1.092315  |
| 6 | 0.181067  | 4.066714  | -0.315749 |
| 1 | 0.752708  | 2.708646  | -1.884681 |

|   |           |          |           |
|---|-----------|----------|-----------|
| 6 | -0.775607 | 3.055611 | 1.658943  |
| 1 | -0.920831 | 0.908762 | 1.647843  |
| 6 | -0.37752  | 4.19781  | 0.958984  |
| 1 | 0.487437  | 4.949054 | -0.870857 |
| 1 | -1.213879 | 3.148668 | 2.649059  |
| 1 | -0.505861 | 5.181868 | 1.400943  |

**R1<sub>IV</sub> + b S<sub>N2</sub>@P-b pathways 2 and 3 in the gas phase**

**RC<sub>IVb-i</sub> 2**

E = -4191.276335      ZPVE = 0.254857      NIMAG = 0.

|    |           |           |           |
|----|-----------|-----------|-----------|
| 17 | 1.330985  | -1.767151 | 2.415651  |
| 15 | 0.891156  | -1.090295 | 0.467579  |
| 12 | -0.997997 | 0.876783  | 0.589574  |
| 35 | 0.22723   | 2.933225  | 0.80341   |
| 6  | 0.255925  | -2.647538 | -0.281141 |
| 1  | 0.09069   | -2.472073 | -1.349196 |
| 1  | 0.940194  | -3.488558 | -0.148647 |
| 1  | -0.703378 | -2.882617 | 0.185702  |
| 6  | 2.531728  | -0.828745 | -0.29273  |
| 6  | 2.946786  | 0.503282  | -0.465148 |
| 6  | 3.367901  | -1.876749 | -0.715788 |
| 6  | 4.181479  | 0.777592  | -1.059042 |
| 1  | 2.318322  | 1.320115  | -0.11952  |
| 6  | 4.596659  | -1.595177 | -1.310774 |
| 1  | 3.070248  | -2.911234 | -0.576927 |
| 6  | 5.004108  | -0.267163 | -1.483791 |
| 1  | 4.49639   | 1.808785  | -1.186701 |
| 1  | 5.238258  | -2.409081 | -1.635346 |
| 1  | 5.963041  | -0.05107  | -1.945875 |

|   |           |           |           |
|---|-----------|-----------|-----------|
| 6 | -2.764534 | -0.288215 | 0.564456  |
| 6 | -3.760848 | -1.043243 | 1.197567  |
| 6 | -2.915325 | -0.148747 | -0.820701 |
| 6 | -4.831594 | -1.603141 | 0.481504  |
| 6 | -3.954746 | -0.672984 | -1.583695 |
| 6 | -4.928861 | -1.414644 | -0.899282 |
| 1 | -5.593654 | -2.178251 | 1.001092  |
| 1 | -4.02687  | -0.526574 | -2.657091 |
| 1 | -5.760972 | -1.840804 | -1.452548 |
| 1 | -3.720643 | -1.196988 | 2.274546  |
| 8 | -1.832927 | 0.593676  | -1.379299 |
| 6 | -1.990644 | 1.265817  | -2.631883 |
| 1 | -1.109408 | 1.897078  | -2.751914 |
| 1 | -2.045146 | 0.544908  | -3.454301 |
| 1 | -2.893005 | 1.886592  | -2.620183 |

**TS<sub>IVb-i</sub> 2**

E = -4191.246087    ZPVE = 0.255072    NIMAG = 1.

|    |           |           |           |
|----|-----------|-----------|-----------|
| 17 | -1.27569  | -3.390114 | 0.670545  |
| 15 | -0.685437 | -1.093615 | 0.852233  |
| 12 | 1.531865  | -0.536098 | -0.001422 |
| 35 | 3.827211  | -0.907362 | -0.332402 |
| 6  | -1.071982 | -1.026011 | 2.659927  |
| 1  | -1.752065 | -0.206878 | 2.899178  |
| 1  | -1.527127 | -1.974858 | 2.939593  |
| 1  | -0.141809 | -0.89157  | 3.218294  |
| 6  | -2.154874 | -0.514214 | -0.105854 |
| 6  | -2.384357 | -1.072727 | -1.372212 |



|   |           |           |           |
|---|-----------|-----------|-----------|
| 6 | -3.034019 | 0.46555   | 0.374771  |
| 6 | -3.466929 | -0.650421 | -2.145956 |
| 1 | -1.738822 | -1.864562 | -1.73758  |
| 6 | -4.126897 | 0.874814  | -0.392799 |
| 1 | -2.868964 | 0.927605  | 1.342158  |
| 6 | -4.344559 | 0.320611  | -1.656562 |
| 1 | -3.633181 | -1.095095 | -3.122856 |
| 1 | -4.804387 | 1.628469  | -0.001869 |
| 1 | -5.193772 | 0.640246  | -2.253525 |
| 6 | 0.055965  | 1.109788  | 0.932403  |
| 6 | -0.103578 | 1.959387  | 2.039248  |
| 6 | 0.415499  | 1.754554  | -0.26396  |
| 6 | 0.028272  | 3.349883  | 1.943588  |
| 6 | 0.560641  | 3.13289   | -0.409081 |
| 6 | 0.344366  | 3.934462  | 0.716308  |
| 1 | -0.116222 | 3.972518  | 2.821852  |
| 1 | 0.836483  | 3.586319  | -1.354352 |
| 1 | 0.442825  | 5.012266  | 0.629419  |
| 1 | -0.358107 | 1.539607  | 3.009077  |
| 8 | 0.706614  | 0.847165  | -1.314445 |
| 6 | 1.135749  | 1.337881  | -2.595624 |
| 1 | 1.287897  | 0.457184  | -3.218978 |
| 1 | 0.354187  | 1.967028  | -3.029129 |
| 1 | 2.073873  | 1.892744  | -2.502524 |

**PC<sub>IVb-i</sub> 2**

E = -4191.352321    ZPVE = 0.257268    NIMAG = 0.

|    |           |           |          |
|----|-----------|-----------|----------|
| 17 | -0.751711 | -3.221361 | 1.337932 |
|----|-----------|-----------|----------|

|    |           |           |           |
|----|-----------|-----------|-----------|
| 15 | 0.62241   | -0.004951 | -0.932336 |
| 12 | -1.297845 | -1.375349 | 0.146996  |
| 35 | -3.133633 | -0.625353 | -1.211268 |
| 6  | 0.664874  | 0.402056  | -2.731207 |
| 1  | 1.398611  | 1.17452   | -2.976081 |
| 1  | 0.923579  | -0.51046  | -3.275471 |
| 1  | -0.334544 | 0.72054   | -3.038797 |
| 6  | 2.371471  | -0.32844  | -0.46499  |
| 6  | 2.696327  | -1.630805 | -0.053074 |
| 6  | 3.383153  | 0.643706  | -0.532327 |
| 6  | 4.014766  | -1.955727 | 0.279649  |
| 1  | 1.919573  | -2.385964 | 0.032114  |
| 6  | 4.697672  | 0.316317  | -0.19829  |
| 1  | 3.14826   | 1.660686  | -0.833069 |
| 6  | 5.015758  | -0.985784 | 0.204162  |
| 1  | 4.252965  | -2.96502  | 0.601492  |
| 1  | 5.472914  | 1.075337  | -0.25081  |
| 1  | 6.039612  | -1.238195 | 0.46432   |
| 6  | 0.147145  | 1.578883  | -0.113125 |
| 6  | 0.442218  | 2.848016  | -0.626758 |
| 6  | -0.598839 | 1.508701  | 1.082296  |
| 6  | 0.045168  | 4.012799  | 0.033871  |
| 6  | -1.002431 | 2.662916  | 1.752312  |
| 6  | -0.670271 | 3.914166  | 1.226014  |
| 1  | 0.289749  | 4.984613  | -0.382654 |
| 1  | -1.57977  | 2.603171  | 2.666398  |
| 1  | -0.989425 | 4.810192  | 1.749328  |
| 1  | 0.987487  | 2.933548  | -1.561303 |
| 8  | -0.912289 | 0.236898  | 1.5489    |
| 6  | -1.384098 | 0.08036   | 2.907064  |

|   |           |           |          |
|---|-----------|-----------|----------|
| 1 | -1.405372 | -0.995668 | 3.08018  |
| 1 | -0.682642 | 0.558392  | 3.595566 |
| 1 | -2.385913 | 0.505081  | 3.014616 |

**PIVb-i 2**

E = -959.133318      ZPVE = 0.252569      NIMAG = 0.

|    |           |           |           |
|----|-----------|-----------|-----------|
| 15 | 0.223995  | -1.041484 | 1.231096  |
| 6  | 0.430105  | -2.844898 | 0.789244  |
| 1  | 0.431279  | -3.03822  | -0.288482 |
| 1  | 1.391419  | -3.168224 | 1.199513  |
| 1  | -0.353396 | -3.441045 | 1.267341  |
| 6  | 1.600771  | -0.324559 | 0.205367  |
| 6  | 2.738107  | 0.148794  | 0.876918  |
| 6  | 1.573587  | -0.259598 | -1.196901 |
| 6  | 3.828284  | 0.662746  | 0.167313  |
| 1  | 2.767057  | 0.121013  | 1.963424  |
| 6  | 2.657721  | 0.259379  | -1.908281 |
| 1  | 0.697355  | -0.608535 | -1.736835 |
| 6  | 3.789617  | 0.720095  | -1.227654 |
| 1  | 4.701353  | 1.023376  | 0.704366  |
| 1  | 2.619286  | 0.304702  | -2.993458 |
| 1  | 4.632677  | 1.123393  | -1.781637 |
| 6  | -1.276883 | -0.586929 | 0.24492   |
| 6  | -2.107221 | -1.515867 | -0.393481 |
| 6  | -1.676849 | 0.771571  | 0.229032  |
| 6  | -3.289618 | -1.129126 | -1.037046 |
| 6  | -2.85172  | 1.170401  | -0.416811 |
| 6  | -3.655436 | 0.214267  | -1.048309 |

|   |           |           |           |
|---|-----------|-----------|-----------|
| 1 | -3.911139 | -1.874564 | -1.523728 |
| 1 | -3.149228 | 2.212201  | -0.431549 |
| 1 | -4.567747 | 0.531412  | -1.545311 |
| 1 | -1.835442 | -2.566097 | -0.394344 |
| 8 | -0.837859 | 1.632892  | 0.876131  |
| 6 | -1.161256 | 3.016203  | 0.923114  |
| 1 | -0.359005 | 3.487885  | 1.491685  |
| 1 | -1.198531 | 3.451253  | -0.083333 |
| 1 | -2.118251 | 3.185686  | 1.432315  |

### RC<sub>IVb-i</sub> 3

E = -4191.268604    ZPVE = 0.254134    NIMAG = 0.

|    |           |           |           |
|----|-----------|-----------|-----------|
| 17 | 0.687729  | -1.118336 | -0.308871 |
| 15 | 1.649193  | 0.837194  | -0.054253 |
| 12 | -1.951428 | -0.820868 | -0.300194 |
| 35 | -2.539295 | -3.123726 | -0.192854 |
| 6  | 1.501509  | 1.41971   | -1.802906 |
| 1  | 2.090726  | 2.339584  | -1.893755 |
| 1  | 1.845348  | 0.695326  | -2.544942 |
| 1  | 0.451674  | 1.659431  | -1.98857  |
| 6  | 3.399273  | 0.28438   | 0.04861   |
| 6  | 3.999281  | 0.383091  | 1.316332  |
| 6  | 4.164097  | -0.194568 | -1.029219 |
| 6  | 5.333992  | 0.015899  | 1.503976  |
| 1  | 3.418841  | 0.752241  | 2.158026  |
| 6  | 5.496766  | -0.559624 | -0.84203  |
| 1  | 3.723158  | -0.292801 | -2.015892 |
| 6  | 6.083543  | -0.454813 | 0.424168  |
| 1  | 5.784702  | 0.097936  | 2.48846   |

|   |           |           |           |
|---|-----------|-----------|-----------|
| 1 | 6.077671  | -0.929593 | -1.681785 |
| 1 | 7.121573  | -0.741054 | 0.565997  |
| 6 | -2.244405 | 1.218946  | -0.768195 |
| 6 | -2.444524 | 2.254801  | -1.688482 |
| 6 | -2.26584  | 1.60449   | 0.577835  |
| 6 | -2.631699 | 3.585583  | -1.27671  |
| 6 | -2.453232 | 2.900778  | 1.047882  |
| 6 | -2.634169 | 3.90351   | 0.082749  |
| 1 | -2.784191 | 4.369289  | -2.014269 |
| 1 | -2.462418 | 3.148822  | 2.104421  |
| 1 | -2.783984 | 4.930297  | 0.404382  |
| 1 | -2.460964 | 2.03555   | -2.75517  |
| 8 | -2.07336  | 0.477924  | 1.422737  |
| 6 | -2.149796 | 0.613351  | 2.841368  |
| 1 | -2.012096 | -0.387044 | 3.252469  |
| 1 | -1.358675 | 1.277091  | 3.20666   |
| 1 | -3.130096 | 1.002957  | 3.136605  |

**TS<sub>IVb-i</sub> 3**

E = -4191.234079      ZPVE = 0.253803      NIMAG = 1.

|    |           |           |           |
|----|-----------|-----------|-----------|
| 17 | -0.136102 | -2.663419 | 0.267603  |
| 15 | 1.433741  | -0.536861 | -0.233221 |
| 12 | -1.668486 | -0.819462 | -0.011065 |
| 35 | -4.042386 | -1.095683 | -0.170128 |
| 6  | 1.40646   | -1.034514 | -2.016454 |
| 1  | 1.879208  | -0.259856 | -2.628892 |
| 1  | 1.936835  | -1.979994 | -2.160593 |
| 1  | 0.373267  | -1.155251 | -2.339516 |

|   |           |           |           |
|---|-----------|-----------|-----------|
| 6 | 3.246902  | -0.380156 | 0.006502  |
| 6 | 3.613628  | 0.038399  | 1.306396  |
| 6 | 4.274743  | -0.635314 | -0.929345 |
| 6 | 4.952304  | 0.198047  | 1.660724  |
| 1 | 2.833756  | 0.235412  | 2.038357  |
| 6 | 5.611621  | -0.4795   | -0.57485  |
| 1 | 4.032255  | -0.958842 | -1.935702 |
| 6 | 5.951652  | -0.06211  | 0.719134  |
| 1 | 5.216508  | 0.52008   | 2.663345  |
| 1 | 6.392534  | -0.680945 | -1.302247 |
| 1 | 6.996548  | 0.058046  | 0.990274  |
| 6 | -0.716862 | 1.032298  | -0.75879  |
| 6 | -0.401163 | 1.880968  | -1.834115 |
| 6 | -1.076948 | 1.6883    | 0.435815  |
| 6 | -0.45016  | 3.277961  | -1.722554 |
| 6 | -1.16522  | 3.066823  | 0.591839  |
| 6 | -0.827177 | 3.864159  | -0.512702 |
| 1 | -0.203541 | 3.904763  | -2.575122 |
| 1 | -1.479727 | 3.528876  | 1.521913  |
| 1 | -0.87286  | 4.945462  | -0.420466 |
| 1 | -0.120152 | 1.451119  | -2.794812 |
| 8 | -1.400748 | 0.766206  | 1.448902  |
| 6 | -2.157797 | 1.197702  | 2.588401  |
| 1 | -2.386336 | 0.297322  | 3.158299  |
| 1 | -1.564005 | 1.88169   | 3.202697  |
| 1 | -3.08725  | 1.677552  | 2.267571  |

**PCIVb-i 3**

E = -4191.352321    ZPVE = 0.257268    NIMAG = 0.

|    |           |           |           |
|----|-----------|-----------|-----------|
| 17 | -0.751572 | -3.221179 | 1.338243  |
| 15 | 0.62245   | -0.004935 | -0.932259 |
| 12 | -1.297778 | -1.375358 | 0.147052  |
| 35 | -3.133582 | -0.625634 | -1.211342 |
| 6  | 0.664907  | 0.40196   | -2.731158 |
| 1  | 1.39862   | 1.174431  | -2.97608  |
| 1  | 0.923641  | -0.510584 | -3.275363 |
| 1  | -0.33452  | 0.720393  | -3.038771 |
| 6  | 2.371508  | -0.328444 | -0.46491  |
| 6  | 2.696347  | -1.630841 | -0.05308  |
| 6  | 3.383202  | 0.643696  | -0.532165 |
| 6  | 4.014779  | -1.955801 | 0.279634  |
| 1  | 1.919586  | -2.385998 | 0.032052  |
| 6  | 4.697714  | 0.316267  | -0.198135 |
| 1  | 3.148326  | 1.6607    | -0.832833 |
| 6  | 5.015783  | -0.985864 | 0.204228  |
| 1  | 4.252962  | -2.965119 | 0.601411  |
| 1  | 5.472963  | 1.075284  | -0.250591 |
| 1  | 6.039631  | -1.238304 | 0.464382  |
| 6  | 0.147178  | 1.578947  | -0.113147 |
| 6  | 0.442336  | 2.848043  | -0.626825 |
| 6  | -0.598947 | 1.508858  | 1.082194  |
| 6  | 0.045241  | 4.012878  | 0.033683  |
| 6  | -1.002593 | 2.663128  | 1.752084  |
| 6  | -0.670341 | 3.914337  | 1.225748  |
| 1  | 0.289893  | 4.984659  | -0.382876 |
| 1  | -1.58004  | 2.603458  | 2.666106  |
| 1  | -0.989537 | 4.810403  | 1.748968  |
| 1  | 0.987709  | 2.933505  | -1.561315 |

|   |           |           |          |
|---|-----------|-----------|----------|
| 8 | -0.912468 | 0.237099  | 1.548853 |
| 6 | -1.384621 | 0.080684  | 2.906908 |
| 1 | -1.405938 | -0.995328 | 3.080122 |
| 1 | -0.68334  | 0.558768  | 3.595551 |
| 1 | -2.386463 | 0.505416  | 3.014169 |

**R1<sub>v</sub> + b S<sub>N2</sub>@P-b pathway 2 in the gas phase**

**RC<sub>v<sub>b</sub>-i 2</sub>**

E = -3999.532798      ZPVE = 0.201327      NIMAG = 0.

|    |           |           |           |
|----|-----------|-----------|-----------|
| 17 | -0.923657 | 2.79407   | 1.102911  |
| 15 | -1.433425 | 1.449822  | -0.431891 |
| 12 | -0.142915 | -0.962961 | -0.236076 |
| 35 | -2.161606 | -2.245668 | -0.040007 |
| 6  | -3.269955 | 1.469628  | -0.338167 |
| 1  | -3.589413 | 1.013231  | 0.601221  |
| 1  | -3.668973 | 2.484452  | -0.418286 |
| 1  | -3.652248 | 0.850078  | -1.156374 |
| 6  | -1.091908 | 2.463428  | -1.93213  |
| 1  | -1.603312 | 3.429271  | -1.898804 |
| 1  | -0.014215 | 2.617191  | -2.026048 |
| 1  | -1.437301 | 1.897731  | -2.805124 |
| 6  | 1.838499  | -0.613968 | -0.868088 |
| 6  | 2.28245   | -0.343066 | 0.431552  |
| 6  | 2.815687  | -0.516982 | -1.865307 |
| 6  | 3.578184  | 0.017697  | 0.787644  |
| 6  | 4.140819  | -0.154964 | -1.569994 |
| 1  | 2.553994  | -0.723231 | -2.901924 |
| 6  | 4.516067  | 0.111969  | -0.252211 |
| 1  | 3.874309  | 0.219843  | 1.811906  |



|   |          |           |           |
|---|----------|-----------|-----------|
| 1 | 4.878252 | -0.085359 | -2.365403 |
| 1 | 5.540164 | 0.390546  | -0.020353 |
| 8 | 1.218968 | -0.491775 | 1.368151  |
| 6 | 1.440311 | -0.227036 | 2.753779  |
| 1 | 1.760735 | 0.810063  | 2.898456  |
| 1 | 0.487065 | -0.390057 | 3.257345  |
| 1 | 2.193025 | -0.912396 | 3.157745  |

**TS<sub>vb-i</sub> 2**

E = -3999.505169      ZPVE = 0.201791      NIMAG = 1.

|    |           |           |           |
|----|-----------|-----------|-----------|
| 17 | -3.212673 | -2.261091 | 0.516373  |
| 15 | -1.850027 | -0.398319 | -0.045121 |
| 12 | 0.540716  | -0.84937  | -0.061077 |
| 35 | 2.505106  | -2.024036 | -0.59964  |
| 6  | -2.730172 | -0.03733  | -1.63273  |
| 1  | -2.022184 | -0.062054 | -2.464955 |
| 1  | -3.489519 | -0.804316 | -1.780791 |
| 1  | -3.206126 | 0.946024  | -1.597101 |
| 6  | -2.663438 | 0.631579  | 1.268337  |
| 1  | -3.727301 | 0.389181  | 1.267858  |
| 1  | -2.252345 | 0.352436  | 2.241136  |
| 1  | -2.510931 | 1.696479  | 1.091478  |
| 6  | -0.398095 | 1.359666  | -0.417695 |
| 6  | 0.576999  | 1.659734  | 0.548833  |
| 6  | -0.626919 | 2.3719    | -1.363726 |
| 6  | 1.271234  | 2.865859  | 0.627841  |
| 6  | 0.03941   | 3.60261   | -1.322985 |
| 1  | -1.357256 | 2.215332  | -2.153446 |

|   |           |           |           |
|---|-----------|-----------|-----------|
| 6 | 0.979639  | 3.850273  | -0.321765 |
| 1 | 2.020587  | 3.050872  | 1.389049  |
| 1 | -0.174178 | 4.36296   | -2.068699 |
| 1 | 1.500417  | 4.802044  | -0.279168 |
| 8 | 0.849965  | 0.571969  | 1.422815  |
| 6 | 1.907481  | 0.67501   | 2.393192  |
| 1 | 1.682657  | 1.476779  | 3.101322  |
| 1 | 1.930785  | -0.281771 | 2.914128  |
| 1 | 2.867408  | 0.851489  | 1.899652  |

**PC<sub>vbi</sub> 2**

E = -3999.608408      ZPVE = 0.203708      NIMAG = 0.

|    |           |           |           |
|----|-----------|-----------|-----------|
| 17 | -2.86573  | 0.428132  | 2.180147  |
| 15 | 0.451089  | 1.692481  | 0.050147  |
| 12 | -1.572035 | 0.095618  | 0.359846  |
| 35 | -1.843459 | -0.712956 | -1.89317  |
| 6  | 0.674516  | 2.55323   | -1.564935 |
| 1  | 0.433279  | 1.85308   | -2.368497 |
| 1  | -0.034172 | 3.385709  | -1.612954 |
| 1  | 1.686191  | 2.945382  | -1.703012 |
| 6  | 1.066581  | 2.910313  | 1.29959   |
| 1  | 0.395829  | 3.774692  | 1.309235  |
| 1  | 1.044736  | 2.451337  | 2.291168  |
| 1  | 2.085043  | 3.242464  | 1.076525  |
| 6  | 1.728541  | 0.360051  | 0.053369  |
| 6  | 1.390425  | -0.910737 | 0.564764  |
| 6  | 3.019615  | 0.538182  | -0.460137 |
| 6  | 2.316505  | -1.955105 | 0.569124  |

|   |           |           |           |
|---|-----------|-----------|-----------|
| 6 | 3.957248  | -0.496008 | -0.457784 |
| 1 | 3.301131  | 1.503478  | -0.870715 |
| 6 | 3.599098  | -1.740508 | 0.058799  |
| 1 | 2.052785  | -2.931914 | 0.954087  |
| 1 | 4.952098  | -0.331236 | -0.858754 |
| 1 | 4.313233  | -2.558195 | 0.062777  |
| 8 | 0.109277  | -1.063515 | 1.080301  |
| 6 | -0.221376 | -2.267547 | 1.808373  |
| 1 | 0.4948    | -2.417441 | 2.620205  |
| 1 | -1.214196 | -2.090745 | 2.223153  |
| 1 | -0.235345 | -3.129163 | 1.135489  |

**R1 + b** SN2@P-f pathway 2 in the gas phase

**RC1b-r 2**

E = -4543.905946      ZPVE = 0.489578      NIMAG = 0.

|   |           |           |           |
|---|-----------|-----------|-----------|
| 6 | -1.518784 | -2.258248 | 0.862075  |
| 6 | -1.5959   | -0.743576 | 0.489877  |
| 6 | -2.8249   | -2.991944 | 0.497617  |
| 6 | -4.167745 | -0.846553 | 0.831115  |
| 6 | -2.847728 | -0.13254  | 1.177577  |
| 6 | -4.054167 | -2.34594  | 1.152657  |
| 6 | -0.229231 | -3.014315 | 0.424456  |
| 6 | -5.35339  | -0.194458 | 1.552552  |
| 6 | 0.195479  | -4.039402 | 1.491136  |
| 6 | -0.304885 | -3.698366 | -0.951794 |
| 1 | -1.479515 | -2.230574 | 1.96261   |
| 1 | -0.710059 | -0.236508 | 0.891807  |
| 1 | -2.753774 | -4.041213 | 0.807183  |

|    |           |           |           |
|----|-----------|-----------|-----------|
| 1  | -2.956593 | -3.00197  | -0.592105 |
| 1  | -4.34186  | -0.749253 | -0.253089 |
| 1  | -2.928711 | 0.936534  | 0.962251  |
| 1  | -2.683353 | -0.213588 | 2.262208  |
| 1  | -4.966864 | -2.866277 | 0.835164  |
| 1  | -3.990374 | -2.46653  | 2.244848  |
| 1  | 0.580937  | -2.27374  | 0.37902   |
| 1  | -5.451079 | 0.863817  | 1.285522  |
| 1  | -6.294832 | -0.694172 | 1.298103  |
| 1  | -5.228137 | -0.254463 | 2.641029  |
| 1  | -0.581498 | -4.797847 | 1.64789   |
| 1  | 1.109708  | -4.556519 | 1.182816  |
| 1  | 0.395055  | -3.555    | 2.453689  |
| 1  | -0.957244 | -4.578163 | -0.915867 |
| 1  | 0.69256   | -4.031092 | -1.254183 |
| 1  | -0.681156 | -3.040491 | -1.739928 |
| 15 | -1.646474 | -0.373111 | -1.371108 |
| 6  | -1.918571 | 1.446862  | -1.411135 |
| 6  | -2.910822 | 1.897579  | -2.297058 |
| 6  | -1.219347 | 2.385609  | -0.631386 |
| 6  | -3.21716  | 3.259299  | -2.388904 |
| 1  | -3.444936 | 1.182852  | -2.918005 |
| 6  | -1.518544 | 3.74314   | -0.732618 |
| 1  | -0.440584 | 2.062347  | 0.052865  |
| 6  | -2.520749 | 4.182011  | -1.607208 |
| 1  | -3.989603 | 3.594526  | -3.074737 |
| 1  | -0.971569 | 4.458094  | -0.125018 |
| 1  | -2.751689 | 5.240898  | -1.680169 |
| 17 | 0.501422  | -0.371732 | -1.851968 |
| 6  | 1.190562  | 2.58287   | 3.391102  |

|    |          |           |           |
|----|----------|-----------|-----------|
| 6  | 1.169147 | 1.29856   | 2.820851  |
| 6  | 1.780833 | 1.024983  | 1.5916    |
| 6  | 2.413307 | 2.116951  | 0.983691  |
| 6  | 2.467898 | 3.410001  | 1.496453  |
| 6  | 1.834722 | 3.630088  | 2.729763  |
| 1  | 0.710157 | 2.76361   | 4.349072  |
| 1  | 2.973832 | 4.224195  | 0.987329  |
| 1  | 1.856546 | 4.623695  | 3.168714  |
| 12 | 2.335073 | -0.295449 | 0.030392  |
| 35 | 3.670403 | -2.113821 | -0.745427 |
| 1  | 0.665142 | 0.500698  | 3.364526  |
| 8  | 3.00306  | 1.733989  | -0.249829 |
| 6  | 3.838363 | 2.643168  | -0.968044 |
| 1  | 4.667925 | 2.978507  | -0.336496 |
| 1  | 4.225922 | 2.09092   | -1.824427 |
| 1  | 3.258798 | 3.505338  | -1.314927 |

**TS<sub>1b-r</sub> 2**

E = -4543.860852      ZPVE = 0.488563      NIMAG = 1.

|   |           |           |           |
|---|-----------|-----------|-----------|
| 6 | -2.313201 | -1.998222 | 0.69839   |
| 6 | -2.2082   | -0.441822 | 0.61618   |
| 6 | -3.374401 | -2.544986 | -0.276824 |
| 6 | -4.711249 | -0.376655 | -0.138168 |
| 6 | -3.637336 | 0.175071  | 0.817737  |
| 6 | -4.753739 | -1.911089 | -0.052813 |
| 6 | -0.951929 | -2.761457 | 0.651506  |
| 6 | -6.078017 | 0.252473  | 0.15702   |
| 6 | -0.965529 | -3.954816 | 1.623475  |

|    |           |           |           |
|----|-----------|-----------|-----------|
| 6  | -0.5235   | -3.241775 | -0.747608 |
| 1  | -2.713359 | -2.161922 | 1.711515  |
| 1  | -1.578264 | -0.08898  | 1.437004  |
| 1  | -3.447227 | -3.632523 | -0.161075 |
| 1  | -3.059046 | -2.371054 | -1.314133 |
| 1  | -4.432286 | -0.107335 | -1.170105 |
| 1  | -3.603842 | 1.267232  | 0.756398  |
| 1  | -3.929376 | -0.069337 | 1.850073  |
| 1  | -5.471982 | -2.303623 | -0.783372 |
| 1  | -5.131165 | -2.196702 | 0.940968  |
| 1  | -0.180439 | -2.069049 | 1.009713  |
| 1  | -6.049236 | 1.343113  | 0.053651  |
| 1  | -6.843105 | -0.129417 | -0.527712 |
| 1  | -6.401761 | 0.021409  | 1.179679  |
| 1  | -1.74512  | -4.679145 | 1.355731  |
| 1  | -0.005263 | -4.479996 | 1.602607  |
| 1  | -1.147439 | -3.631523 | 2.654969  |
| 1  | -1.168011 | -4.051905 | -1.106495 |
| 1  | 0.499679  | -3.630651 | -0.708146 |
| 1  | -0.539166 | -2.451913 | -1.505005 |
| 15 | -1.516566 | 0.207216  | -0.989321 |
| 6  | -1.250625 | 1.957702  | -0.708073 |
| 6  | -1.054231 | 2.705663  | -1.896881 |
| 6  | -1.269169 | 2.641609  | 0.531484  |
| 6  | -0.92226  | 4.090964  | -1.850094 |
| 1  | -0.988164 | 2.184237  | -2.847344 |
| 6  | -1.131555 | 4.022403  | 0.571471  |
| 1  | -1.361072 | 2.089471  | 1.45902   |
| 6  | -0.962635 | 4.749036  | -0.617416 |
| 1  | -0.775243 | 4.65306   | -2.766884 |

|    |           |           |           |
|----|-----------|-----------|-----------|
| 1  | -1.139253 | 4.537792  | 1.526831  |
| 1  | -0.849531 | 5.828631  | -0.576586 |
| 17 | 0.925364  | -0.275507 | -2.79866  |
| 6  | 1.136151  | 1.094906  | 3.431696  |
| 6  | 0.76607   | 0.229669  | 2.38801   |
| 6  | 1.296611  | 0.341304  | 1.10127   |
| 6  | 2.256125  | 1.351659  | 0.931182  |
| 6  | 2.667508  | 2.227436  | 1.934926  |
| 6  | 2.075065  | 2.100525  | 3.197673  |
| 1  | 0.70835   | 0.967916  | 4.422867  |
| 1  | 3.416752  | 2.99236   | 1.757184  |
| 1  | 2.37135   | 2.772758  | 3.997925  |
| 12 | 2.019979  | -0.595876 | -0.773135 |
| 35 | 3.817366  | -2.131306 | -0.311561 |
| 1  | 0.064644  | -0.569995 | 2.624499  |
| 8  | 2.803455  | 1.363274  | -0.365261 |
| 6  | 4.083203  | 1.966034  | -0.590152 |
| 1  | 4.819396  | 1.58059   | 0.121987  |
| 1  | 4.370674  | 1.692427  | -1.605396 |
| 1  | 4.011658  | 3.055682  | -0.512956 |

**PC<sub>1b-r</sub> 2**

E = -4543.987073      ZPVE = 0.492667      NIMAG = 0.

|   |           |          |           |
|---|-----------|----------|-----------|
| 6 | -1.473399 | 2.501666 | -0.548189 |
| 6 | -1.37281  | 1.07956  | -1.184492 |
| 6 | -2.489193 | 2.487878 | 0.609916  |
| 6 | -3.876262 | 0.684185 | -0.564398 |
| 6 | -2.775175 | 0.606486 | -1.640487 |

|    |           |           |           |
|----|-----------|-----------|-----------|
| 6  | -3.881022 | 2.060441  | 0.118773  |
| 6  | -0.114245 | 3.186191  | -0.23718  |
| 6  | -5.246149 | 0.341936  | -1.164422 |
| 6  | 0.747178  | 3.335649  | -1.503637 |
| 6  | -0.291554 | 4.569565  | 0.415368  |
| 1  | -1.928515 | 3.115328  | -1.345294 |
| 1  | -0.744526 | 1.166198  | -2.076242 |
| 1  | -2.564247 | 3.481529  | 1.059205  |
| 1  | -2.144808 | 1.815427  | 1.409347  |
| 1  | -3.654631 | -0.063526 | 0.205334  |
| 1  | -2.733123 | -0.413136 | -2.0415   |
| 1  | -3.067899 | 1.253021  | -2.48201  |
| 1  | -4.590472 | 2.05058   | 0.955855  |
| 1  | -4.250344 | 2.815908  | -0.591777 |
| 1  | 0.44492   | 2.566976  | 0.478025  |
| 1  | -5.248083 | -0.658257 | -1.612907 |
| 1  | -6.027907 | 0.363993  | -0.397018 |
| 1  | -5.525621 | 1.060511  | -1.945445 |
| 1  | 0.223097  | 3.945819  | -2.251613 |
| 1  | 1.69368   | 3.827043  | -1.264216 |
| 1  | 1.008193  | 2.378421  | -1.962394 |
| 1  | -0.92651  | 5.219239  | -0.20125  |
| 1  | 0.682284  | 5.058787  | 0.517562  |
| 1  | -0.732521 | 4.51293   | 1.414187  |
| 15 | -0.379068 | -0.167677 | -0.150119 |
| 6  | -1.493759 | -1.409342 | 0.64072   |
| 6  | -1.745056 | -1.291024 | 2.017592  |
| 6  | -2.058478 | -2.483748 | -0.0664   |
| 6  | -2.575739 | -2.208671 | 2.665494  |
| 1  | -1.27195  | -0.50211  | 2.594394  |



|    |           |           |           |
|----|-----------|-----------|-----------|
| 6  | -2.885894 | -3.400596 | 0.584292  |
| 1  | -1.84676  | -2.614853 | -1.122919 |
| 6  | -3.152082 | -3.260699 | 1.950135  |
| 1  | -2.755805 | -2.107022 | 3.73148   |
| 1  | -3.318077 | -4.226137 | 0.025889  |
| 1  | -3.793476 | -3.976953 | 2.455452  |
| 17 | 1.47071   | -0.046692 | 3.524213  |
| 6  | 0.955772  | -2.068402 | -3.630578 |
| 6  | 0.195856  | -1.295029 | -2.748832 |
| 6  | 0.532746  | -1.185852 | -1.39412  |
| 6  | 1.678604  | -1.878223 | -0.943536 |
| 6  | 2.445505  | -2.653337 | -1.812081 |
| 6  | 2.076682  | -2.746727 | -3.157012 |
| 1  | 0.671944  | -2.135155 | -4.675973 |
| 1  | 3.331547  | -3.168481 | -1.463887 |
| 1  | 2.680048  | -3.346857 | -3.831067 |
| 12 | 1.761223  | 0.239138  | 1.297258  |
| 35 | 3.502531  | 1.32781   | 0.049136  |
| 1  | -0.674177 | -0.771136 | -3.130165 |
| 8  | 1.988449  | -1.740645 | 0.403424  |
| 6  | 3.124317  | -2.454949 | 0.94227   |
| 1  | 4.048818  | -2.090101 | 0.487062  |
| 1  | 3.11604   | -2.240427 | 2.011458  |
| 1  | 2.99693   | -3.528271 | 0.781165  |

**R1<sub>IV</sub> + b** SN2@P-f pathways 2 to 6 in the gas phase

**RC<sub>IVb-r</sub> 2**

E = -4191.268452      ZPVE = 0.254105      NIMAG = 0.

|    |          |           |          |
|----|----------|-----------|----------|
| 17 | 0.032197 | -1.707043 | 0.893397 |
|----|----------|-----------|----------|

|    |           |           |           |
|----|-----------|-----------|-----------|
| 15 | 1.579185  | -0.367549 | 1.661085  |
| 12 | -1.706166 | -0.314631 | -0.573797 |
| 35 | -3.160252 | -2.143279 | -1.035453 |
| 6  | 2.283448  | -1.567659 | 2.887563  |
| 1  | 1.556359  | -1.73006  | 3.687569  |
| 1  | 2.562812  | -2.530882 | 2.453505  |
| 1  | 3.176673  | -1.101447 | 3.319038  |
| 6  | 2.814184  | -0.458508 | 0.30419   |
| 6  | 3.389393  | -1.646089 | -0.181071 |
| 6  | 3.209979  | 0.770718  | -0.248797 |
| 6  | 4.350788  | -1.60097  | -1.188944 |
| 1  | 3.07665   | -2.608587 | 0.212951  |
| 6  | 4.182063  | 0.81413   | -1.252813 |
| 1  | 2.74898   | 1.691768  | 0.096565  |
| 6  | 4.752468  | -0.369791 | -1.722118 |
| 1  | 4.785116  | -2.523528 | -1.562809 |
| 1  | 4.481675  | 1.769962  | -1.671969 |
| 1  | 5.502421  | -0.338572 | -2.507126 |
| 6  | -0.820136 | 1.578995  | -0.861622 |
| 6  | -0.026491 | 2.466947  | -1.596839 |
| 6  | -1.440264 | 2.127207  | 0.267573  |
| 6  | 0.137313  | 3.807791  | -1.208541 |
| 6  | -1.320885 | 3.444286  | 0.700548  |
| 6  | -0.504818 | 4.290163  | -0.066175 |
| 1  | 0.756883  | 4.476405  | -1.801019 |
| 1  | -1.824657 | 3.821766  | 1.584699  |
| 1  | -0.383671 | 5.327473  | 0.233132  |
| 8  | -2.229238 | 1.147573  | 0.929524  |
| 6  | -3.069882 | 1.510752  | 2.023956  |
| 1  | -3.782072 | 2.285491  | 1.719551  |

|   |           |          |           |
|---|-----------|----------|-----------|
| 1 | -3.608341 | 0.606514 | 2.309068  |
| 1 | -2.469828 | 1.867167 | 2.868252  |
| 1 | 0.479643  | 2.121399 | -2.496657 |

**TS<sub>IVb-r</sub> 2**

E = -4191.231066    ZPVE = 0.253641    NIMAG = 1.

|    |           |           |           |
|----|-----------|-----------|-----------|
| 17 | -0.191457 | -2.317416 | -1.084557 |
| 15 | -1.628974 | 0.265896  | -1.480803 |
| 12 | 1.285938  | -0.926572 | 0.023237  |
| 35 | 3.129525  | -1.479465 | 1.444335  |
| 6  | -2.251992 | -0.875942 | -2.802811 |
| 1  | -1.464991 | -1.0557   | -3.53746  |
| 1  | -2.675674 | -1.824911 | -2.476326 |
| 1  | -3.040416 | -0.27375  | -3.284192 |
| 6  | -2.854388 | -0.023612 | -0.170619 |
| 6  | -3.371698 | -1.284107 | 0.191558  |
| 6  | -3.360991 | 1.130392  | 0.464717  |
| 6  | -4.37697  | -1.381319 | 1.149831  |
| 1  | -2.958664 | -2.184104 | -0.250761 |
| 6  | -4.388682 | 1.029456  | 1.403917  |
| 1  | -2.962369 | 2.107058  | 0.206622  |
| 6  | -4.893375 | -0.226006 | 1.750515  |
| 1  | -4.75766  | -2.358005 | 1.433305  |
| 1  | -4.784946 | 1.926707  | 1.869579  |
| 1  | -5.680618 | -0.30791  | 2.494202  |
| 6  | 0.431348  | 1.092582  | 0.15785   |
| 6  | -0.135921 | 2.013854  | 1.043538  |
| 6  | 1.493109  | 1.555839  | -0.634888 |

|   |           |          |           |
|---|-----------|----------|-----------|
| 6 | 0.330418  | 3.332728 | 1.123212  |
| 6 | 1.98084   | 2.860265 | -0.598341 |
| 6 | 1.370879  | 3.755061 | 0.28999   |
| 1 | -0.110354 | 4.026677 | 1.833841  |
| 1 | 2.809555  | 3.185189 | -1.218672 |
| 1 | 1.725734  | 4.780399 | 0.33838   |
| 8 | 2.056829  | 0.530463 | -1.415346 |
| 6 | 3.36825   | 0.709886 | -1.971578 |
| 1 | 4.083781  | 0.969155 | -1.185541 |
| 1 | 3.6386    | -0.24772 | -2.416292 |
| 1 | 3.349749  | 1.481686 | -2.747013 |
| 1 | -0.946558 | 1.704866 | 1.700712  |

**PC<sub>IVb-r</sub> 2**

E = -4191.337765      ZPVE = 0.256621      NIMAG = 0.

|    |           |           |           |
|----|-----------|-----------|-----------|
| 17 | -2.539906 | 0.587753  | 2.572196  |
| 15 | 1.398457  | -2.332449 | -0.02128  |
| 12 | -1.291572 | 0.654451  | 0.673356  |
| 35 | -1.122001 | 2.069606  | -1.244035 |
| 6  | 1.142284  | -2.670724 | 1.789115  |
| 1  | 2.130158  | -2.770064 | 2.24893   |
| 1  | 0.574943  | -1.911288 | 2.329659  |
| 1  | 0.634769  | -3.635133 | 1.88996   |
| 6  | -0.304844 | -1.907101 | -0.628277 |
| 6  | -1.459426 | -1.869133 | 0.179633  |
| 6  | -0.458608 | -1.706062 | -2.012528 |
| 6  | -2.723701 | -1.613893 | -0.38368  |
| 1  | -1.399245 | -2.067018 | 1.245784  |

|   |           |           |           |
|---|-----------|-----------|-----------|
| 6 | -1.712016 | -1.455453 | -2.568601 |
| 1 | 0.414306  | -1.737212 | -2.658845 |
| 6 | -2.849501 | -1.403747 | -1.75774  |
| 1 | -3.594831 | -1.579938 | 0.263519  |
| 1 | -1.799391 | -1.282722 | -3.637003 |
| 1 | -3.822705 | -1.196919 | -2.190853 |
| 6 | 2.225082  | -0.666275 | -0.07336  |
| 6 | 3.361034  | -0.578772 | -0.89978  |
| 6 | 1.808191  | 0.516745  | 0.55771   |
| 6 | 4.044416  | 0.62344   | -1.088314 |
| 6 | 2.460311  | 1.731721  | 0.358902  |
| 6 | 3.586038  | 1.783931  | -0.463493 |
| 1 | 4.919028  | 0.654845  | -1.730591 |
| 1 | 2.07879   | 2.632413  | 0.827554  |
| 1 | 4.090679  | 2.731828  | -0.6221   |
| 8 | 0.682593  | 0.487876  | 1.408469  |
| 6 | 0.965852  | 0.832986  | 2.797116  |
| 1 | 1.281733  | 1.876047  | 2.866872  |
| 1 | 0.032853  | 0.687666  | 3.340478  |
| 1 | 1.751048  | 0.172408  | 3.172133  |
| 1 | 3.706893  | -1.478569 | -1.400642 |

### RC<sub>IVb-r</sub> 3

E = -4191.268283      ZPVE = 0.254029      NIMAG = 0.

|    |              |              |             |
|----|--------------|--------------|-------------|
| 17 | -0.046255000 | 0.167661000  | 0.686238000 |
| 15 | 0.991136000  | 1.387410000  | 2.179978000 |
| 12 | -2.593336000 | -0.079543000 | 1.430866000 |
| 35 | -3.107787000 | -2.110584000 | 0.299412000 |

|   |              |             |              |
|---|--------------|-------------|--------------|
| 6 | 0.555861000  | 3.052550000 | 1.499377000  |
| 1 | 0.791448000  | 3.168516000 | 0.438539000  |
| 1 | -0.508417000 | 3.234461000 | 1.666293000  |
| 1 | 1.128494000  | 3.790356000 | 2.073646000  |
| 6 | 2.715455000  | 1.179798000 | 1.571009000  |
| 6 | 3.153160000  | 1.483203000 | 0.269981000  |
| 6 | 3.645227000  | 0.700227000 | 2.508477000  |
| 6 | 4.493289000  | 1.322796000 | -0.077663000 |
| 1 | 2.447329000  | 1.831820000 | -0.477994000 |
| 6 | 4.991194000  | 0.548445000 | 2.161550000  |
| 1 | 3.315435000  | 0.445047000 | 3.512330000  |
| 6 | 5.415006000  | 0.858339000 | 0.868619000  |
| 1 | 4.820615000  | 1.554618000 | -1.087026000 |
| 1 | 5.700834000  | 0.181204000 | 2.896865000  |
| 1 | 6.458415000  | 0.734853000 | 0.593682000  |
| 6 | -2.788724000 | 1.549369000 | 2.766773000  |
| 6 | -3.349923000 | 2.378729000 | 1.786399000  |
| 6 | -2.655077000 | 2.131221000 | 4.033025000  |
| 6 | -3.769961000 | 3.692222000 | 1.975588000  |
| 6 | -3.056107000 | 3.454516000 | 4.285804000  |
| 1 | -2.233550000 | 1.552123000 | 4.852701000  |
| 6 | -3.610360000 | 4.227350000 | 3.263512000  |
| 1 | -4.205165000 | 4.290821000 | 1.181542000  |
| 1 | -2.942481000 | 3.878255000 | 5.280271000  |
| 1 | -3.927087000 | 5.247983000 | 3.458911000  |
| 8 | -3.428042000 | 1.698000000 | 0.542633000  |
| 6 | -4.140546000 | 2.261616000 | -0.558381000 |
| 1 | -5.177119000 | 2.473786000 | -0.274849000 |
| 1 | -3.653013000 | 3.179630000 | -0.904183000 |
| 1 | -4.119346000 | 1.510903000 | -1.348758000 |

**TS<sub>IVb-r</sub> 3**

E = -4191.223572    ZPVE = 0.253294    NIMAG = 1.

|    |           |           |           |
|----|-----------|-----------|-----------|
| 17 | 0.065904  | 0.875993  | -2.474527 |
| 15 | -0.103638 | 2.014561  | 0.487562  |
| 12 | -0.169885 | -0.910536 | -1.022355 |
| 35 | 1.600199  | -2.51475  | -0.767685 |
| 6  | 0.040901  | 3.468596  | -0.635689 |
| 1  | 0.857124  | 3.452581  | -1.355483 |
| 1  | -0.905372 | 3.600205  | -1.165125 |
| 1  | 0.165577  | 4.323814  | 0.048138  |
| 6  | 1.585162  | 1.442261  | 0.704945  |
| 6  | 2.664468  | 1.662982  | -0.183446 |
| 6  | 1.828264  | 0.739281  | 1.912463  |
| 6  | 3.939885  | 1.222366  | 0.143353  |
| 1  | 2.489262  | 2.130612  | -1.144986 |
| 6  | 3.111293  | 0.311349  | 2.238306  |
| 1  | 1.002755  | 0.538913  | 2.588681  |
| 6  | 4.166071  | 0.550682  | 1.353116  |
| 1  | 4.758158  | 1.374523  | -0.553492 |
| 1  | 3.28551   | -0.225584 | 3.165143  |
| 1  | 5.16364   | 0.194989  | 1.592985  |
| 6  | -1.62277  | -0.598018 | 0.52867   |
| 6  | -2.926714 | -0.205713 | 0.147323  |
| 6  | -1.445404 | -0.962762 | 1.875197  |
| 6  | -3.994268 | -0.158757 | 1.057094  |
| 6  | -2.492488 | -0.941239 | 2.800492  |
| 1  | -0.464617 | -1.297515 | 2.209305  |

|   |           |           |           |
|---|-----------|-----------|-----------|
| 6 | -3.76353  | -0.525101 | 2.385545  |
| 1 | -4.987879 | 0.150794  | 0.752309  |
| 1 | -2.329536 | -1.256832 | 3.827338  |
| 1 | -4.583873 | -0.487087 | 3.097107  |
| 8 | -3.065388 | 0.093762  | -1.183669 |
| 6 | -4.33911  | 0.472063  | -1.690747 |
| 1 | -5.075649 | -0.330036 | -1.556694 |
| 1 | -4.70602  | 1.387576  | -1.209673 |
| 1 | -4.190681 | 0.657419  | -2.755157 |

**PC<sub>IVb-r</sub> 3**

E = -4191.321290    ZPVE = 0.256269    NIMAG = 0.

|    |           |           |           |
|----|-----------|-----------|-----------|
| 17 | 0.3431    | -1.154636 | 2.657028  |
| 15 | 1.325491  | 2.05022   | -0.652974 |
| 12 | -0.847883 | -0.968612 | 0.759783  |
| 35 | -2.841637 | -1.726418 | -0.31407  |
| 6  | 2.008963  | 2.442223  | 1.038629  |
| 1  | 1.824856  | 1.664301  | 1.784161  |
| 1  | 3.084712  | 2.594322  | 0.950094  |
| 1  | 1.549063  | 3.379762  | 1.365904  |
| 6  | -0.503012 | 2.079439  | -0.306017 |
| 6  | -1.059704 | 1.806824  | 0.963149  |
| 6  | -1.371995 | 2.423279  | -1.352779 |
| 6  | -2.444884 | 1.868098  | 1.165475  |
| 1  | -0.41586  | 1.594536  | 1.812067  |
| 6  | -2.755501 | 2.473386  | -1.150807 |
| 1  | -0.962396 | 2.659681  | -2.331443 |
| 6  | -3.294479 | 2.199653  | 0.106882  |



|   |           |           |           |
|---|-----------|-----------|-----------|
| 1 | -2.853158 | 1.667482  | 2.152019  |
| 1 | -3.410622 | 2.727583  | -1.978885 |
| 1 | -4.367918 | 2.237922  | 0.261917  |
| 6 | 1.559027  | 0.207559  | -0.799485 |
| 6 | 2.812792  | -0.396598 | -0.544321 |
| 6 | 0.530145  | -0.623787 | -1.28483  |
| 6 | 2.983205  | -1.780346 | -0.684121 |
| 6 | 0.699397  | -2.01118  | -1.442515 |
| 1 | -0.408704 | -0.180251 | -1.611707 |
| 6 | 1.92817   | -2.58425  | -1.120711 |
| 1 | 3.935209  | -2.240194 | -0.448517 |
| 1 | -0.120377 | -2.611758 | -1.821987 |
| 1 | 2.07605   | -3.65541  | -1.214252 |
| 8 | 3.813369  | 0.446765  | -0.168972 |
| 6 | 5.102458  | -0.086153 | 0.129097  |
| 1 | 5.056125  | -0.783964 | 0.972886  |
| 1 | 5.536425  | -0.585028 | -0.745354 |
| 1 | 5.719002  | 0.771478  | 0.399187  |

**RC<sub>IVb-r</sub> 4**

E = -4191.274231    ZPVE = 0.254446    NIMAG = 0.

|    |           |           |           |
|----|-----------|-----------|-----------|
| 17 | -0.303311 | -0.113909 | 1.970784  |
| 15 | -2.500569 | -0.333923 | 2.06081   |
| 12 | 1.223596  | -0.883498 | -0.014721 |
| 35 | -0.152607 | -2.264254 | -1.45071  |
| 6  | -2.627828 | -2.068446 | 1.436601  |
| 1  | -2.052775 | -2.261409 | 0.527382  |
| 1  | -2.289106 | -2.745761 | 2.225564  |

|   |           |           |           |
|---|-----------|-----------|-----------|
| 1 | -3.690321 | -2.261303 | 1.246824  |
| 6 | -3.028106 | 0.670141  | 0.619277  |
| 6 | -2.809349 | 0.34425   | -0.731967 |
| 6 | -3.737777 | 1.842758  | 0.937289  |
| 6 | -3.312228 | 1.171434  | -1.736229 |
| 1 | -2.248267 | -0.543037 | -1.007457 |
| 6 | -4.239746 | 2.666688  | -0.072942 |
| 1 | -3.903565 | 2.105514  | 1.978977  |
| 6 | -4.025689 | 2.331013  | -1.411207 |
| 1 | -3.141322 | 0.911976  | -2.777103 |
| 1 | -4.789542 | 3.566766  | 0.185509  |
| 1 | -4.415914 | 2.967028  | -2.200596 |
| 6 | 3.123348  | -0.217714 | 0.608812  |
| 6 | 4.281182  | -0.329894 | 1.387595  |
| 6 | 3.097098  | 0.869546  | -0.271554 |
| 6 | 5.33704   | 0.589144  | 1.273284  |
| 6 | 4.10891   | 1.811138  | -0.430118 |
| 6 | 5.251233  | 1.649181  | 0.367817  |
| 1 | 6.227138  | 0.476009  | 1.886724  |
| 1 | 4.038198  | 2.637876  | -1.130081 |
| 1 | 6.068746  | 2.358893  | 0.277663  |
| 1 | 4.379462  | -1.148627 | 2.098109  |
| 8 | 1.865081  | 0.911002  | -0.988532 |
| 6 | 1.759582  | 1.658938  | -2.200872 |
| 1 | 2.56257   | 1.38021   | -2.891995 |
| 1 | 0.792653  | 1.40116   | -2.634116 |
| 1 | 1.798277  | 2.733817  | -1.995863 |

E = -4191.226924    ZPVE = 0.253139    NIMAG = 1.

|    |           |           |           |
|----|-----------|-----------|-----------|
| 17 | -0.389017 | 1.858367  | 2.104285  |
| 15 | 0.138931  | 2.005868  | -0.852118 |
| 12 | 0.068439  | -0.304287 | 1.3156    |
| 35 | -1.458095 | -2.130107 | 1.537859  |
| 6  | -0.367056 | 3.73096   | -0.430809 |
| 1  | -1.285768 | 3.84309   | 0.142651  |
| 1  | 0.453694  | 4.217199  | 0.101449  |
| 1  | -0.476831 | 4.227435  | -1.407706 |
| 6  | -1.424012 | 1.135649  | -1.101962 |
| 6  | -2.678894 | 1.498336  | -0.559773 |
| 6  | -1.353222 | 0.022954  | -1.976014 |
| 6  | -3.823242 | 0.795706  | -0.913727 |
| 1  | -2.745474 | 2.297921  | 0.168835  |
| 6  | -2.506845 | -0.671821 | -2.331659 |
| 1  | -0.387843 | -0.297496 | -2.355497 |
| 6  | -3.740469 | -0.2837   | -1.805002 |
| 1  | -4.780231 | 1.069302  | -0.480525 |
| 1  | -2.441372 | -1.524002 | -3.000426 |
| 1  | -4.637969 | -0.837185 | -2.064829 |
| 6  | 1.972287  | 0.06295   | 0.39213   |
| 6  | 2.914497  | 0.946412  | 0.952492  |
| 6  | 2.437264  | -0.801448 | -0.624065 |
| 6  | 4.262891  | 0.932417  | 0.578586  |
| 6  | 3.778825  | -0.835187 | -1.020496 |
| 6  | 4.686195  | 0.04055   | -0.409829 |
| 1  | 4.973117  | 1.606825  | 1.048679  |
| 1  | 4.12921   | -1.517583 | -1.787343 |
| 1  | 5.727638  | 0.023049  | -0.719441 |

|   |          |           |           |
|---|----------|-----------|-----------|
| 1 | 2.586266 | 1.653181  | 1.71254   |
| 8 | 1.466723 | -1.602018 | -1.180884 |
| 6 | 1.855964 | -2.668559 | -2.039571 |
| 1 | 2.561017 | -3.340896 | -1.536204 |
| 1 | 0.940524 | -3.214711 | -2.271649 |
| 1 | 2.306525 | -2.296368 | -2.968596 |

**PC<sub>IVb-r</sub> 4**

E = -4191.324663    ZPVE = 0.256196    NIMAG = 0.

|    |           |           |           |
|----|-----------|-----------|-----------|
| 17 | -1.429606 | 3.17183   | 0.833243  |
| 15 | 0.060183  | -0.351011 | -2.555041 |
| 12 | -0.501707 | 1.112802  | 0.835526  |
| 35 | 0.092864  | -0.631631 | 2.354135  |
| 6  | -0.616727 | 1.162848  | -3.398994 |
| 1  | -1.019112 | 1.946344  | -2.750815 |
| 1  | 0.177304  | 1.594575  | -4.015828 |
| 1  | -1.414278 | 0.829236  | -4.069871 |
| 6  | -1.326566 | -0.810636 | -1.391266 |
| 6  | -2.25364  | 0.11495   | -0.867868 |
| 6  | -1.419333 | -2.149828 | -0.981936 |
| 6  | -3.225434 | -0.288891 | 0.060577  |
| 1  | -2.266603 | 1.146935  | -1.208543 |
| 6  | -2.394245 | -2.551123 | -0.065644 |
| 1  | -0.716746 | -2.876345 | -1.377799 |
| 6  | -3.293142 | -1.623318 | 0.464974  |
| 1  | -3.92414  | 0.443724  | 0.453785  |
| 1  | -2.440857 | -3.590229 | 0.247219  |
| 1  | -4.038354 | -1.935959 | 1.189554  |

|   |          |           |           |
|---|----------|-----------|-----------|
| 6 | 1.215204 | 0.396052  | -1.289518 |
| 6 | 1.29227  | 1.770464  | -0.993189 |
| 6 | 2.112744 | -0.474831 | -0.616022 |
| 6 | 2.210016 | 2.274117  | -0.056078 |
| 6 | 3.04784  | 0.028962  | 0.295707  |
| 6 | 3.079945 | 1.394021  | 0.585061  |
| 1 | 2.225567 | 3.335962  | 0.164052  |
| 1 | 3.721177 | -0.639636 | 0.816796  |
| 1 | 3.791489 | 1.764276  | 1.316361  |
| 1 | 0.646201 | 2.47305   | -1.508303 |
| 8 | 1.9766   | -1.793418 | -0.901773 |
| 6 | 2.724175 | -2.748157 | -0.145507 |
| 1 | 2.518004 | -2.638695 | 0.924226  |
| 1 | 2.380983 | -3.724405 | -0.488759 |
| 1 | 3.798704 | -2.651745 | -0.340204 |

**PIVb-r 4**

E = -959.133318      ZPVE = 0.252569      NIMAG = 0.

|    |           |           |           |
|----|-----------|-----------|-----------|
| 15 | -0.224023 | 1.041314  | -1.231173 |
| 6  | -0.430115 | 2.844797  | -0.789579 |
| 1  | 0.353438  | 3.440848  | -1.267708 |
| 1  | -1.391392 | 3.168102  | -1.19995  |
| 1  | -0.431344 | 3.038274  | 0.288119  |
| 6  | 1.276861  | 0.586902  | -0.244932 |
| 6  | 1.676924  | -0.771565 | -0.228965 |
| 6  | 2.107108  | 1.515934  | 0.393453  |
| 6  | 2.851812  | -1.170274 | 0.416926  |
| 6  | 3.289515  | 1.129313  | 1.03707   |

|   |           |           |           |
|---|-----------|-----------|-----------|
| 1 | 1.835247  | 2.566143  | 0.394261  |
| 6 | 3.655437  | -0.214052 | 1.048403  |
| 1 | 3.149395  | -2.212053 | 0.431717  |
| 1 | 3.910963  | 1.87482   | 1.523738  |
| 1 | 4.56776   | -0.531104 | 1.545443  |
| 8 | 0.838022  | -1.632996 | -0.876036 |
| 6 | 1.161553  | -3.016281 | -0.922934 |
| 1 | 1.198844  | -3.451274 | 0.083537  |
| 1 | 0.359363  | -3.488071 | -1.491501 |
| 1 | 2.118578  | -3.1857   | -1.4321   |
| 6 | -1.600825 | 0.32452   | -0.205383 |
| 6 | -2.738085 | -0.149032 | -0.876927 |
| 6 | -1.573739 | 0.259813  | 1.1969    |
| 6 | -3.828276 | -0.662931 | -0.167309 |
| 1 | -2.76696  | -0.121446 | -1.963439 |
| 6 | -2.65789  | -0.25911  | 1.908295  |
| 1 | -0.69758  | 0.608914  | 1.736842  |
| 6 | -3.789705 | -0.720028 | 1.227672  |
| 1 | -4.701283 | -1.023715 | -0.70436  |
| 1 | -2.619529 | -0.304234 | 2.993482  |
| 1 | -4.632777 | -1.123284 | 1.781667  |

**RC<sub>IVb-r</sub> 5**

E = -4191.268939    ZPVE = 0.254180    NIMAG = 0.

|    |           |           |           |
|----|-----------|-----------|-----------|
| 17 | 0.667881  | -1.117989 | -0.170397 |
| 15 | 1.654827  | 0.828657  | -0.059543 |
| 12 | -1.982561 | -0.819656 | -0.249668 |
| 35 | -2.538621 | -3.128379 | -0.129754 |

|   |           |           |           |
|---|-----------|-----------|-----------|
| 6 | 1.522567  | 1.280363  | -1.849201 |
| 1 | 1.907271  | 0.511486  | -2.523868 |
| 1 | 0.474714  | 1.488768  | -2.078602 |
| 1 | 2.100627  | 2.201249  | -1.989989 |
| 6 | 3.401092  | 0.259116  | 0.053708  |
| 6 | 4.017932  | -0.622225 | -0.851203 |
| 6 | 4.151956  | 0.775169  | 1.122703  |
| 6 | 5.35943   | -0.966632 | -0.694822 |
| 1 | 3.44891   | -1.053783 | -1.669239 |
| 6 | 5.500992  | 0.438887  | 1.271601  |
| 1 | 3.681192  | 1.443643  | 1.83911   |
| 6 | 6.104114  | -0.433007 | 0.364117  |
| 1 | 5.825444  | -1.653188 | -1.395561 |
| 1 | 6.072507  | 0.849536  | 2.098585  |
| 1 | 7.1496    | -0.702728 | 0.481417  |
| 6 | -2.2409   | 1.203369  | -0.797053 |
| 6 | -2.412707 | 2.206409  | -1.758401 |
| 6 | -2.279711 | 1.639155  | 0.532988  |
| 6 | -2.587742 | 3.55402   | -1.399771 |
| 1 | -2.415035 | 1.947656  | -2.816326 |
| 6 | -2.456091 | 2.954489  | 0.951307  |
| 6 | -2.606476 | 3.922784  | -0.053394 |
| 1 | -2.717364 | 4.311438  | -2.16848  |
| 1 | -2.479581 | 3.242172  | 1.997505  |
| 1 | -2.746304 | 4.962885  | 0.227329  |
| 8 | -2.123311 | 0.541471  | 1.422966  |
| 6 | -2.183969 | 0.739168  | 2.835247  |
| 1 | -1.376593 | 1.402095  | 3.164561  |
| 1 | -3.153658 | 1.160585  | 3.121565  |
| 1 | -2.062063 | -0.244876 | 3.288598  |

**TS<sub>IVb-r</sub> 5**

E = -4191.222398    ZPVE = 0.253165    NIMAG = 1.

|    |           |           |           |
|----|-----------|-----------|-----------|
| 17 | 0.602258  | -1.227203 | 1.658653  |
| 15 | 1.117053  | 0.278777  | -1.099381 |
| 12 | -1.475012 | -0.791946 | 0.754239  |
| 35 | -2.902296 | -2.585785 | 0.040469  |
| 6  | 0.564519  | -1.280832 | -1.917338 |
| 1  | 0.613865  | -2.156044 | -1.264251 |
| 1  | -0.460045 | -1.165514 | -2.274155 |
| 1  | 1.222466  | -1.447808 | -2.780418 |
| 6  | 2.775027  | -0.143956 | -0.529457 |
| 6  | 3.357059  | -1.431219 | -0.483536 |
| 6  | 3.581182  | 0.977595  | -0.224034 |
| 6  | 4.703402  | -1.581133 | -0.178207 |
| 1  | 2.751515  | -2.310402 | -0.671122 |
| 6  | 4.929394  | 0.822364  | 0.094225  |
| 1  | 3.142083  | 1.971794  | -0.246289 |
| 6  | 5.490656  | -0.456647 | 0.1146    |
| 1  | 5.143833  | -2.573077 | -0.149459 |
| 1  | 5.537696  | 1.691261  | 0.325229  |
| 1  | 6.540186  | -0.583918 | 0.363519  |
| 6  | -1.531751 | 1.071418  | -0.313972 |
| 6  | -2.013566 | 1.294377  | -1.616408 |
| 6  | -1.311728 | 2.218059  | 0.483821  |
| 6  | -2.228286 | 2.57877   | -2.120324 |
| 1  | -2.231745 | 0.442553  | -2.258625 |
| 6  | -1.510731 | 3.521385  | 0.005003  |



|   |           |          |           |
|---|-----------|----------|-----------|
| 6 | -1.962692 | 3.688745 | -1.306613 |
| 1 | -2.614748 | 2.720433 | -3.125707 |
| 1 | -1.32609  | 4.392216 | 0.624434  |
| 1 | -2.11407  | 4.693563 | -1.691493 |
| 8 | -0.915421 | 1.938979 | 1.767363  |
| 6 | -0.652202 | 3.005556 | 2.672313  |
| 1 | 0.151804  | 3.653302 | 2.301715  |
| 1 | -1.552879 | 3.605855 | 2.850539  |
| 1 | -0.335865 | 2.533693 | 3.603075  |

**PC<sub>IVb-r</sub> 5**

E = -4191.318365      ZPVE = 0.256182      NIMAG = 0.

|    |           |           |           |
|----|-----------|-----------|-----------|
| 17 | -1.181891 | 0.783642  | 2.713704  |
| 15 | 1.585573  | -0.241186 | -1.902409 |
| 12 | -2.074125 | 0.067319  | 0.794578  |
| 35 | -3.526993 | -1.583721 | -0.103334 |
| 6  | 0.529311  | -1.693241 | -2.413014 |
| 1  | -0.164168 | -2.036587 | -1.638758 |
| 1  | -0.030406 | -1.452471 | -3.322227 |
| 1  | 1.21296   | -2.512548 | -2.653022 |
| 6  | 2.42134   | -0.955421 | -0.409746 |
| 6  | 1.848467  | -1.040496 | 0.867557  |
| 6  | 3.712797  | -1.473042 | -0.603114 |
| 6  | 2.541822  | -1.637083 | 1.92287   |
| 1  | 0.867017  | -0.620803 | 1.065467  |
| 6  | 4.404136  | -2.081266 | 0.448248  |
| 1  | 4.183769  | -1.393249 | -1.579963 |
| 6  | 3.819424  | -2.164347 | 1.714463  |

|   |           |           |           |
|---|-----------|-----------|-----------|
| 1 | 2.08029   | -1.684356 | 2.904797  |
| 1 | 5.400227  | -2.480566 | 0.279259  |
| 1 | 4.357343  | -2.630144 | 2.53515   |
| 6 | 0.310426  | 0.905679  | -1.199653 |
| 6 | -1.062089 | 0.768886  | -1.460556 |
| 6 | 0.731819  | 2.089209  | -0.532648 |
| 6 | -2.002836 | 1.74676   | -1.060885 |
| 1 | -1.425876 | -0.09771  | -2.002004 |
| 6 | -0.192067 | 3.066327  | -0.136619 |
| 6 | -1.552008 | 2.894045  | -0.398779 |
| 1 | -3.047822 | 1.632082  | -1.336763 |
| 1 | 0.137907  | 3.951608  | 0.392094  |
| 1 | -2.256407 | 3.65864   | -0.086567 |
| 8 | 2.062201  | 2.185974  | -0.323101 |
| 6 | 2.589517  | 3.303289  | 0.394444  |
| 1 | 2.396682  | 4.240964  | -0.139293 |
| 1 | 2.169595  | 3.350152  | 1.404938  |
| 1 | 3.663735  | 3.129676  | 0.451231  |

**RC<sub>IVb-r</sub> 6**

E = -4191.268282    ZPVE = 0.254018    NIMAG = 0.

|    |           |           |           |
|----|-----------|-----------|-----------|
| 17 | -0.71787  | -1.00837  | 0.257044  |
| 15 | -1.784964 | 0.73171   | -0.53562  |
| 12 | 1.837612  | -0.82772  | -0.480323 |
| 35 | 2.404464  | -3.139042 | -0.401542 |
| 6  | -1.397479 | 1.916372  | 0.832487  |
| 1  | -1.639136 | 1.532989  | 1.826951  |
| 1  | -0.338118 | 2.178776  | 0.781992  |

|   |           |           |           |
|---|-----------|-----------|-----------|
| 1 | -1.988538 | 2.820915  | 0.646701  |
| 6 | -3.50434  | 0.229635  | -0.112773 |
| 6 | -3.953309 | -0.101664 | 1.177561  |
| 6 | -4.41835  | 0.206885  | -1.179249 |
| 6 | -5.28935  | -0.43383  | 1.394808  |
| 1 | -3.259072 | -0.114702 | 2.012457  |
| 6 | -5.760461 | -0.11743  | -0.958807 |
| 1 | -4.079278 | 0.443541  | -2.184547 |
| 6 | -6.195712 | -0.43891  | 0.327474  |
| 1 | -5.625316 | -0.693771 | 2.394434  |
| 1 | -6.457987 | -0.126922 | -1.790981 |
| 1 | -7.235985 | -0.698233 | 0.501046  |
| 6 | 1.991528  | 1.237342  | -0.913927 |
| 6 | 2.52698   | 1.535046  | 0.346484  |
| 6 | 1.844051  | 2.333735  | -1.771806 |
| 6 | 2.910126  | 2.797699  | 0.789629  |
| 6 | 2.208009  | 3.633946  | -1.380833 |
| 6 | 2.738132  | 3.862     | -0.109404 |
| 1 | 3.326514  | 2.973464  | 1.776524  |
| 1 | 2.084409  | 4.46534   | -2.06999  |
| 1 | 3.026242  | 4.8652    | 0.191877  |
| 1 | 1.440653  | 2.187409  | -2.772191 |
| 8 | 2.621359  | 0.360063  | 1.138184  |
| 6 | 3.314659  | 0.36998   | 2.385905  |
| 1 | 3.311933  | -0.660596 | 2.741751  |
| 1 | 4.345768  | 0.712945  | 2.247796  |
| 1 | 2.800825  | 1.014051  | 3.107819  |

E = -4191.225320    ZPVE = 0.253415    NIMAG = 1.

|    |           |           |           |
|----|-----------|-----------|-----------|
| 17 | 0.933429  | 1.449047  | -1.431917 |
| 15 | 1.321556  | -0.619862 | 0.649834  |
| 12 | -1.233038 | 0.982665  | -0.718837 |
| 35 | -2.919112 | 2.576329  | -0.189403 |
| 6  | 0.750813  | 0.605015  | 1.913986  |
| 1  | 0.905344  | 1.649126  | 1.631057  |
| 1  | -0.304844 | 0.421182  | 2.12515   |
| 1  | 1.329191  | 0.40317   | 2.825478  |
| 6  | 3.043352  | -0.116978 | 0.368547  |
| 6  | 3.639275  | 1.113564  | 0.71754   |
| 6  | 3.861405  | -1.144505 | -0.149632 |
| 6  | 5.010358  | 1.29455   | 0.578887  |
| 1  | 3.028091  | 1.932802  | 1.079301  |
| 6  | 5.236412  | -0.957617 | -0.296585 |
| 1  | 3.413051  | -2.094017 | -0.431383 |
| 6  | 5.811085  | 0.260528  | 0.071077  |
| 1  | 5.460528  | 2.243909  | 0.853086  |
| 1  | 5.853663  | -1.75666  | -0.695486 |
| 1  | 6.88056   | 0.412317  | -0.042278 |
| 6  | -1.140868 | -1.153128 | -0.56515  |
| 6  | -1.903411 | -1.823893 | 0.417523  |
| 6  | -0.833134 | -1.875354 | -1.734149 |
| 6  | -2.374916 | -3.128209 | 0.231199  |
| 6  | -1.293692 | -3.179126 | -1.94792  |
| 6  | -2.056873 | -3.799979 | -0.956454 |
| 1  | -2.970262 | -3.631435 | 0.985022  |
| 1  | -1.056761 | -3.705355 | -2.86819  |
| 1  | -2.414246 | -4.816078 | -1.099885 |

|   |           |           |           |
|---|-----------|-----------|-----------|
| 1 | -0.216952 | -1.40535  | -2.499712 |
| 8 | -2.135734 | -1.094574 | 1.560167  |
| 6 | -3.039527 | -1.603621 | 2.53693   |
| 1 | -3.118635 | -0.830616 | 3.302419  |
| 1 | -4.02856  | -1.78437  | 2.09977   |
| 1 | -2.662244 | -2.528891 | 2.989735  |

**PC<sub>IVb-r</sub> 6**

E = -4191.323891      ZPVE = 0.256208      NIMAG = 0.

|    |           |           |           |
|----|-----------|-----------|-----------|
| 17 | -1.682486 | 3.343218  | 0.93382   |
| 15 | -0.198834 | -2.467139 | 0.141299  |
| 12 | -0.162234 | 1.92443   | 0.109084  |
| 35 | 1.265335  | 1.561332  | -1.767006 |
| 6  | 0.417364  | -2.47782  | -1.621142 |
| 1  | 0.587126  | -1.480772 | -2.034354 |
| 1  | 1.35098   | -3.03948  | -1.664815 |
| 1  | -0.336002 | -2.99854  | -2.219835 |
| 6  | -1.871414 | -1.692472 | -0.075459 |
| 6  | -2.142218 | -0.669945 | -1.005811 |
| 6  | -2.919845 | -2.162056 | 0.72981   |
| 6  | -3.429688 | -0.140869 | -1.12477  |
| 1  | -1.357179 | -0.304707 | -1.663685 |
| 6  | -4.207199 | -1.624695 | 0.61758   |
| 1  | -2.728756 | -2.958789 | 1.444157  |
| 6  | -4.462688 | -0.610841 | -0.306727 |
| 1  | -3.624587 | 0.645216  | -1.848582 |
| 1  | -5.005742 | -1.999141 | 1.251604  |
| 1  | -5.46005  | -0.190966 | -0.396126 |

|   |           |           |           |
|---|-----------|-----------|-----------|
| 6 | 0.709231  | -1.031416 | 0.90266   |
| 6 | 2.123225  | -0.956463 | 0.843765  |
| 6 | 0.045714  | -0.053576 | 1.664491  |
| 6 | 2.815583  | 0.113642  | 1.426376  |
| 6 | 0.738387  | 1.007778  | 2.286778  |
| 6 | 2.125091  | 1.10192   | 2.128294  |
| 1 | 3.890297  | 0.193187  | 1.32121   |
| 1 | 0.195453  | 1.72301   | 2.897497  |
| 1 | 2.673999  | 1.922333  | 2.579487  |
| 1 | -1.029296 | -0.131943 | 1.80922   |
| 8 | 2.737919  | -1.97214  | 0.188063  |
| 6 | 4.162515  | -1.990286 | 0.096635  |
| 1 | 4.409033  | -2.903431 | -0.445106 |
| 1 | 4.532277  | -1.122579 | -0.460672 |
| 1 | 4.619607  | -2.021109 | 1.0924    |

**R1v + b** S<sub>N2</sub>@P-f pathway 2 in the gas phase

**RC<sub>v<sub>b-r</sub></sub> 2**

E = -3999.525038      ZPVE = 0.200656      NIMAG = 0.

|    |           |           |           |
|----|-----------|-----------|-----------|
| 17 | -0.614791 | 1.996174  | 0.013336  |
| 15 | 1.490852  | 2.355142  | 0.395327  |
| 12 | -1.082015 | -0.637146 | -0.332033 |
| 35 | -3.452876 | -0.480447 | -0.340758 |
| 6  | 2.120311  | 2.264889  | -1.342566 |
| 1  | 2.067659  | 1.230588  | -1.690716 |
| 1  | 1.57284   | 2.919445  | -2.026995 |
| 1  | 3.175436  | 2.564512  | -1.321976 |
| 6  | 1.37401   | 4.195307  | 0.59764   |
| 1  | 0.884425  | 4.686728  | -0.248101 |

|   |           |           |           |
|---|-----------|-----------|-----------|
| 1 | 0.836223  | 4.434257  | 1.518719  |
| 1 | 2.397176  | 4.578939  | 0.692455  |
| 6 | 0.81831   | -1.392574 | -0.850819 |
| 6 | 1.166976  | -1.650706 | 0.480264  |
| 6 | 1.782536  | -1.74941  | -1.800803 |
| 6 | 2.368684  | -2.204017 | 0.911539  |
| 6 | 3.018197  | -2.305826 | -1.4281   |
| 1 | 1.580825  | -1.597854 | -2.860162 |
| 6 | 3.307413  | -2.527634 | -0.08033  |
| 1 | 2.592553  | -2.385101 | 1.957867  |
| 1 | 3.748626  | -2.572171 | -2.187602 |
| 1 | 4.259882  | -2.961553 | 0.210722  |
| 8 | 0.109255  | -1.278594 | 1.354752  |
| 6 | 0.238299  | -1.459018 | 2.76502   |
| 1 | 1.074678  | -0.866918 | 3.15174   |
| 1 | -0.696382 | -1.111266 | 3.205686  |
| 1 | 0.387129  | -2.517619 | 3.003587  |

**TS<sub>vb-r</sub> 2**

E = -3999.485029      ZPVE = 0.200002      NIMAG = 1.

|    |           |           |           |
|----|-----------|-----------|-----------|
| 17 | -1.077338 | -2.419314 | 0.422592  |
| 15 | -2.740589 | -0.065073 | 0.080146  |
| 12 | 0.590316  | -0.898529 | -0.050808 |
| 35 | 2.8705    | -1.170246 | -0.702677 |
| 6  | -3.119987 | -0.532336 | -1.666049 |
| 1  | -2.599598 | 0.105602  | -2.379355 |
| 1  | -2.875076 | -1.58021  | -1.859628 |
| 1  | -4.202358 | -0.40311  | -1.799833 |

|   |           |           |           |
|---|-----------|-----------|-----------|
| 6 | -3.845392 | -1.312614 | 0.911203  |
| 1 | -3.94455  | -2.276405 | 0.409619  |
| 1 | -3.542156 | -1.465022 | 1.948796  |
| 1 | -4.82049  | -0.796113 | 0.921329  |
| 6 | -0.43662  | 1.031287  | -0.448598 |
| 6 | 0.220121  | 1.518901  | 0.69519   |
| 6 | -0.710889 | 1.974676  | -1.448655 |
| 6 | 0.55799   | 2.856088  | 0.891901  |
| 6 | -0.377622 | 3.325313  | -1.298519 |
| 1 | -1.19071  | 1.667299  | -2.375444 |
| 6 | 0.236846  | 3.765015  | -0.122245 |
| 1 | 1.065268  | 3.19499   | 1.78873   |
| 1 | -0.589909 | 4.030539  | -2.097004 |
| 1 | 0.484461  | 4.814567  | 0.005324  |
| 8 | 0.561573  | 0.492759  | 1.593697  |
| 6 | 1.52694   | 0.747413  | 2.626512  |
| 1 | 1.123764  | 1.457162  | 3.354725  |
| 1 | 1.704053  | -0.212092 | 3.111916  |
| 1 | 2.458676  | 1.123663  | 2.193948  |

**PC<sub>Vb-r</sub> 2**

E = -3999.583583      ZPVE = 0.202731      NIMAG = 0.

|    |           |           |           |
|----|-----------|-----------|-----------|
| 17 | -3.276397 | 1.621537  | 0.78962   |
| 15 | 1.641747  | 1.544859  | -1.528458 |
| 12 | -1.785695 | 0.073005  | 0.147013  |
| 35 | -1.542644 | -2.090705 | -0.793632 |
| 6  | -0.190581 | 1.474367  | -1.894385 |
| 1  | -0.481322 | 0.446823  | -2.14246  |



|   |           |           |           |
|---|-----------|-----------|-----------|
| 1 | -0.81507  | 1.898563  | -1.095987 |
| 1 | -0.383388 | 2.078907  | -2.78614  |
| 6 | 1.705435  | 3.102869  | -0.503224 |
| 1 | 0.964525  | 3.132286  | 0.300654  |
| 1 | 2.707111  | 3.216402  | -0.078671 |
| 1 | 1.527178  | 3.95417   | -1.168438 |
| 6 | 1.927018  | 0.206903  | -0.259234 |
| 6 | 1.159118  | -0.135868 | 0.863919  |
| 6 | 3.082599  | -0.566608 | -0.482837 |
| 6 | 1.503659  | -1.180687 | 1.717854  |
| 6 | 3.45957   | -1.603239 | 0.372096  |
| 1 | 3.693807  | -0.339211 | -1.351565 |
| 6 | 2.660113  | -1.920364 | 1.470677  |
| 1 | 0.857864  | -1.431949 | 2.553378  |
| 1 | 4.359267  | -2.174567 | 0.165791  |
| 1 | 2.926369  | -2.739809 | 2.13077   |
| 8 | -0.035874 | 0.574925  | 1.133896  |
| 6 | -0.0429   | 1.343815  | 2.371568  |
| 1 | 0.801786  | 2.035779  | 2.362871  |
| 1 | -0.989747 | 1.883386  | 2.38626   |
| 1 | 0.02785   | 0.672309  | 3.230068  |

**R1 + b** S<sub>N2</sub>@Cl pathway, followed by S<sub>N2</sub>@C pathway, in the gas phase

**RC1**

E = -4543.910169      ZPVE = 0.489496      NIMAG = 0.

|   |           |           |           |
|---|-----------|-----------|-----------|
| 6 | -2.49791  | -0.449945 | -1.146687 |
| 6 | -3.108781 | -2.388103 | 0.398854  |
| 6 | -1.26542  | -2.716112 | -1.346411 |

|   |           |           |           |
|---|-----------|-----------|-----------|
| 6 | -1.805198 | -1.473737 | -2.072258 |
| 6 | -2.392608 | -3.374423 | -0.537263 |
| 6 | -4.487777 | -0.184146 | 0.535951  |
| 6 | -0.617358 | -3.69616  | -2.331508 |
| 6 | -5.211831 | 0.882092  | -0.30603  |
| 6 | -5.520442 | -0.920544 | 1.408483  |
| 1 | -2.927781 | 0.33129   | -1.779612 |
| 1 | -3.934874 | -2.91131  | 0.888947  |
| 1 | -2.420715 | -2.075125 | 1.195593  |
| 1 | -0.491949 | -2.396017 | -0.634875 |
| 1 | -1.007945 | -0.991265 | -2.645964 |
| 1 | -2.559606 | -1.796765 | -2.806086 |
| 1 | -1.98975  | -4.209196 | 0.049006  |
| 1 | -3.125763 | -3.806688 | -1.236302 |
| 1 | -3.801608 | 0.333387  | 1.226215  |
| 1 | 0.208803  | -3.226114 | -2.877453 |
| 1 | -0.217647 | -4.572055 | -1.808661 |
| 1 | -1.346223 | -4.052167 | -3.071057 |
| 1 | -5.914852 | 0.407306  | -1.002469 |
| 1 | -5.788617 | 1.55409   | 0.338456  |
| 1 | -4.527934 | 1.503596  | -0.889248 |
| 1 | -6.183319 | -1.541752 | 0.792261  |
| 1 | -6.147657 | -0.197605 | 1.941138  |
| 1 | -5.053924 | -1.564626 | 2.158024  |
| 6 | -1.775544 | 2.198851  | -0.136711 |
| 6 | -1.91762  | 2.965274  | 1.031787  |
| 6 | -1.926742 | 2.829933  | -1.383711 |
| 6 | -2.247952 | 4.322007  | 0.958521  |
| 1 | -1.778369 | 2.49539   | 2.002102  |
| 6 | -2.237045 | 4.186986  | -1.457949 |

|    |           |           |           |
|----|-----------|-----------|-----------|
| 1  | -1.793299 | 2.264665  | -2.301773 |
| 6  | -2.403432 | 4.934673  | -0.285876 |
| 1  | -2.371283 | 4.897948  | 1.871018  |
| 1  | -2.346363 | 4.663707  | -2.427809 |
| 1  | -2.650726 | 5.990554  | -0.346134 |
| 17 | 0.553405  | 0.452019  | -0.988158 |
| 6  | -3.651667 | -1.151809 | -0.351018 |
| 1  | -4.339349 | -1.526571 | -1.128383 |
| 15 | -1.356732 | 0.418577  | 0.113315  |
| 6  | 4.98519   | -0.725641 | -1.738354 |
| 6  | 6.164754  | 0.008257  | -1.949481 |
| 6  | 6.501347  | 1.056451  | -1.091146 |
| 6  | 5.667977  | 1.385897  | -0.011139 |
| 6  | 4.515998  | 0.621958  | 0.146209  |
| 6  | 4.118703  | -0.437944 | -0.677688 |
| 1  | 4.751275  | -1.538521 | -2.42381  |
| 1  | 6.819542  | -0.23894  | -2.781096 |
| 1  | 7.413374  | 1.624494  | -1.25202  |
| 1  | 5.930034  | 2.200909  | 0.656138  |
| 8  | 3.564933  | 0.834482  | 1.184141  |
| 6  | 3.836821  | 1.748363  | 2.244912  |
| 1  | 3.002795  | 1.662709  | 2.942255  |
| 1  | 4.770684  | 1.480114  | 2.751025  |
| 1  | 3.900209  | 2.773885  | 1.864892  |
| 12 | 2.362382  | -0.784044 | 0.441929  |
| 35 | 0.961631  | -1.900077 | 2.047127  |

**TS1<sub>t</sub>**

E = -4543.841228      ZPVE = 0.488556      NIMAG = 1.

|   |           |           |           |
|---|-----------|-----------|-----------|
| 6 | 2.356309  | -0.031885 | 1.262528  |
| 6 | 2.875956  | -2.402116 | 0.478641  |
| 6 | 0.903264  | -2.013441 | 2.061756  |
| 6 | 1.51681   | -0.646825 | 2.406951  |
| 6 | 2.004996  | -2.98057  | 1.604927  |
| 6 | 4.461729  | -0.474713 | -0.229196 |
| 6 | 0.078198  | -2.575904 | 3.224619  |
| 6 | 5.201455  | 0.781999  | 0.264451  |
| 6 | 5.498033  | -1.516876 | -0.688875 |
| 1 | 2.824743  | 0.87475   | 1.653612  |
| 1 | 3.672619  | -3.11799  | 0.256543  |
| 1 | 2.278497  | -2.307573 | -0.43816  |
| 1 | 0.221734  | -1.881227 | 1.203283  |
| 1 | 0.735235  | 0.052125  | 2.721809  |
| 1 | 2.182245  | -0.784258 | 3.273593  |
| 1 | 1.55791   | -3.927711 | 1.27828   |
| 1 | 2.641591  | -3.21686  | 2.471669  |
| 1 | 3.864617  | -0.194704 | -1.110409 |
| 1 | -0.731578 | -1.893781 | 3.507911  |
| 1 | -0.36761  | -3.542387 | 2.9633    |
| 1 | 0.708231  | -2.729117 | 4.109649  |
| 1 | 5.791834  | 0.556078  | 1.162363  |
| 1 | 5.894065  | 1.144826  | -0.502823 |
| 1 | 4.525772  | 1.607127  | 0.50147   |
| 1 | 6.062951  | -1.915882 | 0.16408   |
| 1 | 6.218358  | -1.055428 | -1.37323  |
| 1 | 5.042635  | -2.359372 | -1.215922 |
| 6 | 1.709568  | 2.24557   | -0.549286 |
| 6 | 1.512651  | 2.710655  | -1.865679 |

|    |           |           |           |
|----|-----------|-----------|-----------|
| 6  | 2.134955  | 3.174597  | 0.420492  |
| 6  | 1.760906  | 4.040948  | -2.206752 |
| 1  | 1.184777  | 2.01467   | -2.633739 |
| 6  | 2.378961  | 4.505573  | 0.080522  |
| 1  | 2.265785  | 2.866272  | 1.453369  |
| 6  | 2.196962  | 4.945448  | -1.234809 |
| 1  | 1.614888  | 4.369704  | -3.231961 |
| 1  | 2.706457  | 5.203032  | 0.846737  |
| 1  | 2.391695  | 5.98113   | -1.497236 |
| 17 | -1.039399 | 0.962533  | 0.698307  |
| 6  | 3.486965  | -1.032975 | 0.844987  |
| 1  | 4.08735   | -1.184906 | 1.759723  |
| 15 | 1.306944  | 0.48552   | -0.23799  |
| 6  | -4.053882 | 2.048609  | 1.715208  |
| 6  | -5.444501 | 2.234722  | 1.653277  |
| 6  | -6.205348 | 1.459319  | 0.77792   |
| 6  | -5.591877 | 0.497745  | -0.036201 |
| 6  | -4.206947 | 0.343124  | 0.059624  |
| 6  | -3.429033 | 1.091885  | 0.924239  |
| 1  | -3.465596 | 2.662426  | 2.395847  |
| 1  | -5.926528 | 2.980004  | 2.281     |
| 1  | -7.281191 | 1.593969  | 0.717058  |
| 1  | -6.202868 | -0.092309 | -0.710868 |
| 8  | -3.513335 | -0.630658 | -0.742888 |
| 6  | -4.301254 | -1.498265 | -1.591352 |
| 1  | -3.596504 | -2.182998 | -2.062549 |
| 1  | -5.018504 | -2.055915 | -0.983538 |
| 1  | -4.820468 | -0.905949 | -2.349375 |
| 12 | -1.480501 | -0.831057 | -0.643648 |
| 35 | -0.805545 | -2.703583 | -1.928969 |

**INT<sub>t</sub>**

E = -4543.891717    ZPVE = 0.490251    NIMAG = 0.

|    |           |           |           |
|----|-----------|-----------|-----------|
| 17 | 2.95725   | -1.678675 | 1.149806  |
| 15 | -0.588667 | 0.43786   | 0.685196  |
| 12 | 1.011192  | -0.965431 | -0.563124 |
| 35 | 0.971929  | -2.408313 | -2.48628  |
| 6  | 3.767727  | -0.109532 | 1.095112  |
| 6  | 3.593762  | 0.710576  | -0.028636 |
| 6  | 4.587713  | 0.273507  | 2.149794  |
| 6  | 4.256637  | 1.937859  | -0.079227 |
| 6  | 5.249661  | 1.502465  | 2.091177  |
| 1  | 4.702207  | -0.384118 | 3.004373  |
| 6  | 5.084745  | 2.325252  | 0.977543  |
| 1  | 4.127166  | 2.593677  | -0.931225 |
| 1  | 5.889542  | 1.806784  | 2.912448  |
| 1  | 5.593314  | 3.282467  | 0.925627  |
| 8  | 2.746681  | 0.257165  | -1.018482 |
| 6  | 2.748946  | 0.921583  | -2.307042 |
| 1  | 3.769941  | 0.966334  | -2.692949 |
| 1  | 2.133583  | 0.292708  | -2.950885 |
| 1  | 2.318001  | 1.922035  | -2.215934 |
| 6  | -2.46832  | 2.346105  | -0.578381 |
| 6  | -1.65962  | 1.034232  | -0.817356 |
| 6  | -3.760546 | 2.036703  | 0.202911  |
| 6  | -3.890322 | -0.302571 | -0.813143 |
| 6  | -2.556577 | -0.009014 | -1.522426 |
| 6  | -4.637238 | 1.008705  | -0.52802  |

|   |           |           |           |
|---|-----------|-----------|-----------|
| 6 | -1.653055 | 3.522559  | 0.023556  |
| 6 | -4.744938 | -1.279632 | -1.630461 |
| 6 | -0.347605 | 3.785428  | -0.749247 |
| 6 | -2.470731 | 4.82699   | 0.076886  |
| 1 | -2.782014 | 2.678621  | -1.585986 |
| 1 | -0.867915 | 1.286921  | -1.535196 |
| 1 | -4.34338  | 2.949907  | 0.359427  |
| 1 | -3.496839 | 1.658352  | 1.200321  |
| 1 | -3.671085 | -0.774094 | 0.151595  |
| 1 | -2.004514 | -0.942228 | -1.683625 |
| 1 | -2.792307 | 0.379446  | -2.528009 |
| 1 | -5.542716 | 0.801778  | 0.057916  |
| 1 | -4.976762 | 1.443879  | -1.481448 |
| 1 | -1.376844 | 3.246587  | 1.049894  |
| 1 | -4.217141 | -2.225675 | -1.797418 |
| 1 | -5.687075 | -1.507085 | -1.117767 |
| 1 | -4.993173 | -0.858613 | -2.613528 |
| 1 | -0.547474 | 3.965403  | -1.814542 |
| 1 | 0.161544  | 4.671622  | -0.35303  |
| 1 | 0.350011  | 2.946578  | -0.666646 |
| 1 | -2.817625 | 5.116947  | -0.924021 |
| 1 | -1.856044 | 5.648127  | 0.463393  |
| 1 | -3.3481   | 4.748538  | 0.724321  |
| 6 | -1.525375 | -0.86723  | 1.639728  |
| 6 | -2.136211 | -0.505426 | 2.856637  |
| 6 | -1.564072 | -2.230538 | 1.282787  |
| 6 | -2.771435 | -1.450469 | 3.666879  |
| 1 | -2.103428 | 0.533775  | 3.1721    |
| 6 | -2.191318 | -3.183131 | 2.091626  |
| 1 | -1.115521 | -2.560337 | 0.347685  |

|   |           |           |          |
|---|-----------|-----------|----------|
| 6 | -2.802126 | -2.795212 | 3.286791 |
| 1 | -3.237015 | -1.136756 | 4.597626 |
| 1 | -2.203601 | -4.225526 | 1.784449 |
| 1 | -3.291481 | -3.532918 | 3.916618 |

**TS2<sub>i</sub>**

E = -4543.850825      ZPVE = 0.489131      NIMAG = 1.

|    |           |           |           |
|----|-----------|-----------|-----------|
| 17 | -2.033872 | -0.264123 | 2.313688  |
| 15 | 0.331499  | 0.189878  | 0.121356  |
| 12 | -1.928728 | 1.146335  | 0.300617  |
| 35 | -3.071743 | 3.045404  | -0.58034  |
| 6  | -1.492672 | -1.721519 | 0.919667  |
| 6  | -2.396314 | -1.775725 | -0.148948 |
| 6  | -1.000096 | -2.883833 | 1.498107  |
| 6  | -2.738058 | -3.000742 | -0.708244 |
| 6  | -1.344606 | -4.117583 | 0.930447  |
| 1  | -0.350397 | -2.827849 | 2.364758  |
| 6  | -2.21162  | -4.180822 | -0.160864 |
| 1  | -3.402988 | -3.049687 | -1.563499 |
| 1  | -0.941601 | -5.028201 | 1.363792  |
| 1  | -2.490746 | -5.13787  | -0.588534 |
| 8  | -2.831875 | -0.54043  | -0.627197 |
| 6  | -3.853797 | -0.499331 | -1.644981 |
| 1  | -4.736043 | -1.048589 | -1.305371 |
| 1  | -4.089911 | 0.556008  | -1.777518 |
| 1  | -3.470396 | -0.923225 | -2.57734  |
| 6  | 2.352563  | -0.669171 | -1.932563 |
| 6  | 1.267092  | 0.368873  | -1.527978 |



|   |           |           |           |
|---|-----------|-----------|-----------|
| 6 | 3.698613  | -0.362463 | -1.241822 |
| 6 | 3.114157  | 2.122859  | -1.057185 |
| 6 | 1.782842  | 1.813253  | -1.757583 |
| 6 | 4.165198  | 1.08342   | -1.474833 |
| 6 | 1.89236   | -2.14639  | -1.806448 |
| 6 | 3.578571  | 3.55474   | -1.351651 |
| 6 | 0.649395  | -2.429911 | -2.668837 |
| 6 | 3.000574  | -3.148517 | -2.177122 |
| 1 | 2.515     | -0.494683 | -3.011843 |
| 1 | 0.416744  | 0.237432  | -2.20986  |
| 1 | 4.469629  | -1.041777 | -1.618731 |
| 1 | 3.617149  | -0.549029 | -0.164929 |
| 1 | 2.960467  | 2.033057  | 0.02669   |
| 1 | 1.01593   | 2.536028  | -1.457123 |
| 1 | 1.925639  | 1.945145  | -2.843148 |
| 1 | 5.103857  | 1.26001   | -0.933586 |
| 1 | 4.392588  | 1.221814  | -2.543567 |
| 1 | 1.612642  | -2.324886 | -0.758132 |
| 1 | 2.834486  | 4.29015   | -1.024804 |
| 1 | 4.520405  | 3.778994  | -0.837586 |
| 1 | 3.742752  | 3.702115  | -2.426821 |
| 1 | 0.854602  | -2.219775 | -3.726931 |
| 1 | 0.356229  | -3.481914 | -2.587765 |
| 1 | -0.214155 | -1.833571 | -2.363671 |
| 1 | 3.379019  | -2.96219  | -3.190806 |
| 1 | 2.609251  | -4.171652 | -2.155128 |
| 1 | 3.850488  | -3.109718 | -1.490307 |
| 6 | 1.405944  | 0.260696  | 1.61355   |
| 6 | 2.162436  | -0.850397 | 2.033431  |
| 6 | 1.405021  | 1.403387  | 2.436126  |

|   |          |           |          |
|---|----------|-----------|----------|
| 6 | 2.908013 | -0.811762 | 3.214055 |
| 1 | 2.164725 | -1.755775 | 1.43461  |
| 6 | 2.14367  | 1.442372  | 3.620776 |
| 1 | 0.823737 | 2.273021  | 2.142629 |
| 6 | 2.902473 | 0.335933  | 4.011782 |
| 1 | 3.487228 | -1.681105 | 3.513521 |
| 1 | 2.127932 | 2.338367  | 4.235114 |
| 1 | 3.479293 | 0.365341  | 4.93165  |

**PC<sub>i</sub>**

E = -4543.979310    ZPVE = 0.492818    NIMAG = 0.

|    |           |           |           |
|----|-----------|-----------|-----------|
| 17 | 2.906637  | 0.793578  | 2.61227   |
| 15 | -0.231565 | 0.115177  | 0.319008  |
| 12 | 2.357345  | -0.189508 | 0.649848  |
| 35 | 3.504365  | -1.900288 | -0.61242  |
| 6  | -0.044994 | 1.914593  | -0.096866 |
| 6  | 1.170227  | 2.313649  | -0.695479 |
| 6  | -0.964818 | 2.92037   | 0.224966  |
| 6  | 1.42139   | 3.645037  | -1.024518 |
| 6  | -0.722771 | 4.260105  | -0.085881 |
| 1  | -1.88368  | 2.657893  | 0.735853  |
| 6  | 0.463583  | 4.616725  | -0.724461 |
| 1  | 2.355773  | 3.935997  | -1.488246 |
| 1  | -1.457437 | 5.016184  | 0.172087  |
| 1  | 0.663124  | 5.65405   | -0.975076 |
| 8  | 2.108137  | 1.308532  | -0.917098 |
| 6  | 3.224542  | 1.566453  | -1.801923 |
| 1  | 3.915708  | 2.277576  | -1.340796 |

|   |           |           |           |
|---|-----------|-----------|-----------|
| 1 | 3.708887  | 0.599202  | -1.933798 |
| 1 | 2.853623  | 1.946858  | -2.756939 |
| 6 | -2.280958 | -0.725803 | -1.809718 |
| 6 | -0.8199   | -0.769314 | -1.267968 |
| 6 | -3.206006 | -1.668671 | -1.006462 |
| 6 | -1.222754 | -3.16098  | -0.377209 |
| 6 | -0.329768 | -2.238588 | -1.218987 |
| 6 | -2.659656 | -3.102927 | -0.915495 |
| 6 | -2.851931 | 0.696379  | -2.068483 |
| 6 | -0.674457 | -4.593153 | -0.355027 |
| 6 | -2.020416 | 1.456547  | -3.118324 |
| 6 | -4.323225 | 0.669674  | -2.522604 |
| 1 | -2.19023  | -1.184567 | -2.810238 |
| 1 | -0.175763 | -0.248438 | -1.987744 |
| 1 | -4.190888 | -1.702677 | -1.481668 |
| 1 | -3.363566 | -1.280956 | 0.004822  |
| 1 | -1.229956 | -2.787309 | 0.658753  |
| 1 | 0.70891   | -2.287367 | -0.880726 |
| 1 | -0.323017 | -2.613804 | -2.253578 |
| 1 | -3.325214 | -3.70957  | -0.288078 |
| 1 | -2.67472  | -3.560248 | -1.916742 |
| 1 | -2.808314 | 1.271337  | -1.134541 |
| 1 | 0.34735   | -4.621349 | 0.038004  |
| 1 | -1.296871 | -5.246009 | 0.267437  |
| 1 | -0.652419 | -5.017771 | -1.36661  |
| 1 | -2.029887 | 0.922146  | -4.076844 |
| 1 | -2.437696 | 2.454247  | -3.290872 |
| 1 | -0.979103 | 1.592042  | -2.816313 |
| 1 | -4.450985 | 0.035878  | -3.409433 |
| 1 | -4.65416  | 1.679055  | -2.78996  |

|   |           |           |           |
|---|-----------|-----------|-----------|
| 1 | -4.99842  | 0.299107  | -1.746393 |
| 6 | -1.361417 | 0.055155  | 1.772259  |
| 6 | -2.717069 | 0.430244  | 1.78303   |
| 6 | -0.773455 | -0.364661 | 2.979204  |
| 6 | -3.46207  | 0.378384  | 2.961952  |
| 1 | -3.2045   | 0.759645  | 0.873136  |
| 6 | -1.520424 | -0.41508  | 4.158979  |
| 1 | 0.279863  | -0.623917 | 3.010139  |
| 6 | -2.865894 | -0.045768 | 4.153403  |
| 1 | -4.508174 | 0.670723  | 2.948484  |
| 1 | -1.042626 | -0.73663  | 5.079341  |
| 1 | -3.447519 | -0.084092 | 5.069784  |

**R1<sub>II</sub> + b S<sub>N2</sub>@Cl** pathway, followed by S<sub>N2</sub>@C pathway, in the gas phase

**RC<sub>II</sub>**

E = -4235.414484    ZPVE = 0.370233    NIMAG = 0.

|    |           |           |           |
|----|-----------|-----------|-----------|
| 17 | -0.429937 | -0.655801 | 0.791207  |
| 15 | -2.24932  | -0.191598 | -0.329084 |
| 12 | 1.530927  | 1.003696  | 0.144257  |
| 35 | 0.350746  | 2.898814  | -0.71815  |
| 6  | -2.721042 | -1.988306 | -0.813262 |
| 6  | -3.349022 | 0.485235  | 1.083143  |
| 6  | 3.150085  | -0.026378 | 1.017889  |
| 6  | 3.533708  | -0.599615 | -0.20002  |
| 6  | 3.951838  | -0.364326 | 2.114394  |
| 6  | 4.617487  | -1.450612 | -0.392675 |
| 6  | 5.057701  | -1.221095 | 1.984974  |
| 1  | 3.723731  | 0.042786  | 3.097971  |

|   |           |           |           |
|---|-----------|-----------|-----------|
| 6 | 5.387317  | -1.758627 | 0.739293  |
| 1 | 4.873704  | -1.868084 | -1.361307 |
| 1 | 5.663006  | -1.465335 | 2.85417   |
| 1 | 6.244267  | -2.418432 | 0.636972  |
| 8 | 2.649484  | -0.202405 | -1.244994 |
| 6 | 2.991015  | -0.444169 | -2.609558 |
| 1 | 3.004995  | -1.519126 | -2.819389 |
| 1 | 2.219264  | 0.038158  | -3.210374 |
| 1 | 3.968462  | -0.007338 | -2.841845 |
| 6 | -1.73658  | -2.330627 | -1.957486 |
| 1 | -1.996247 | -3.310358 | -2.377457 |
| 1 | -1.780809 | -1.594196 | -2.766737 |
| 1 | -0.70391  | -2.386037 | -1.6      |
| 6 | -2.634066 | -3.080837 | 0.265561  |
| 1 | -3.353913 | -2.933322 | 1.072026  |
| 1 | -2.850909 | -4.052763 | -0.196346 |
| 1 | -1.635068 | -3.141323 | 0.70483   |
| 6 | -4.150748 | -1.931047 | -1.395925 |
| 1 | -4.27261  | -1.123016 | -2.126778 |
| 1 | -4.360251 | -2.873777 | -1.916099 |
| 1 | -4.908972 | -1.812089 | -0.617154 |
| 6 | -2.566174 | 1.659064  | 1.71736   |
| 1 | -2.140429 | 2.332253  | 0.967205  |
| 1 | -3.253264 | 2.237441  | 2.347155  |
| 1 | -1.751816 | 1.303983  | 2.354114  |
| 6 | -4.589687 | 1.074022  | 0.365556  |
| 1 | -5.216326 | 0.308795  | -0.099614 |
| 1 | -5.207064 | 1.595967  | 1.106757  |
| 1 | -4.308355 | 1.803551  | -0.401059 |
| 6 | -3.78294  | -0.494252 | 2.183086  |

|   |           |           |          |
|---|-----------|-----------|----------|
| 1 | -4.472801 | -1.256858 | 1.811417 |
| 1 | -2.926162 | -0.993641 | 2.645397 |
| 1 | -4.306271 | 0.061178  | 2.972039 |

**TS1<sub>II</sub>**

E = -4235.342216    ZPVE = 0.368956    NIMAG = 1.

|    |           |           |           |
|----|-----------|-----------|-----------|
| 17 | 0.079846  | -1.199764 | 0.694177  |
| 15 | -2.016645 | -0.159126 | -0.17384  |
| 12 | 0.589461  | 0.94107   | -0.002549 |
| 35 | 0.567261  | 3.30959   | 0.113372  |
| 6  | -2.568357 | -1.309632 | -1.596095 |
| 6  | -3.196284 | -0.142053 | 1.331704  |
| 6  | 2.522584  | -1.297871 | 0.842348  |
| 6  | 3.150908  | -0.614957 | -0.188751 |
| 6  | 3.273802  | -2.233623 | 1.549084  |
| 6  | 4.490718  | -0.80844  | -0.530831 |
| 6  | 4.625472  | -2.460594 | 1.241865  |
| 1  | 2.814237  | -2.802001 | 2.356341  |
| 6  | 5.226165  | -1.749472 | 0.202544  |
| 1  | 4.97714   | -0.260477 | -1.330955 |
| 1  | 5.201598  | -3.189069 | 1.807137  |
| 1  | 6.269951  | -1.916116 | -0.04677  |
| 8  | 2.341066  | 0.345009  | -0.891147 |
| 6  | 2.932761  | 1.088763  | -1.973426 |
| 1  | 3.246247  | 0.404458  | -2.766725 |
| 1  | 2.161315  | 1.767042  | -2.340015 |
| 1  | 3.78207   | 1.675361  | -1.613334 |
| 6  | -1.323818 | -1.481214 | -2.496057 |

|   |           |           |           |
|---|-----------|-----------|-----------|
| 1 | -1.609652 | -2.02531  | -3.404947 |
| 1 | -0.913184 | -0.514351 | -2.811606 |
| 1 | -0.533481 | -2.049484 | -1.998694 |
| 6 | -3.071295 | -2.695691 | -1.159467 |
| 1 | -4.011045 | -2.633757 | -0.603989 |
| 1 | -3.259271 | -3.313015 | -2.047946 |
| 1 | -2.335718 | -3.216394 | -0.539037 |
| 6 | -3.658382 | -0.581529 | -2.418221 |
| 1 | -3.321038 | 0.407027  | -2.746653 |
| 1 | -3.89168  | -1.172528 | -3.314258 |
| 1 | -4.587003 | -0.452873 | -1.857186 |
| 6 | -2.625062 | 0.956754  | 2.25688   |
| 1 | -2.56778  | 1.928684  | 1.757349  |
| 1 | -3.276235 | 1.063381  | 3.133682  |
| 1 | -1.626673 | 0.69749   | 2.625144  |
| 6 | -4.618493 | 0.265378  | 0.891779  |
| 1 | -5.102125 | -0.512272 | 0.293839  |
| 1 | -5.239116 | 0.424408  | 1.783634  |
| 1 | -4.619293 | 1.196774  | 0.316395  |
| 6 | -3.247247 | -1.470597 | 2.110165  |
| 1 | -3.676037 | -2.283764 | 1.520837  |
| 1 | -2.252389 | -1.77852  | 2.443365  |
| 1 | -3.87559  | -1.341696 | 3.001605  |

### INT1II

E = -4235.397233    ZPVE = 0.371210    NIMAG = 0.

|    |           |           |           |
|----|-----------|-----------|-----------|
| 17 | 1.628455  | -1.846806 | 1.06047   |
| 15 | -2.220278 | -0.36689  | -0.724513 |

|    |           |           |           |
|----|-----------|-----------|-----------|
| 12 | -0.04925  | 0.175049  | 0.33277   |
| 35 | 1.052394  | 2.110237  | 1.271124  |
| 6  | -3.039094 | -1.900274 | 0.113119  |
| 6  | -3.240673 | 1.247092  | -0.426606 |
| 6  | 3.012406  | -1.168043 | 0.197164  |
| 6  | 2.779337  | -0.324314 | -0.897339 |
| 6  | 4.299147  | -1.477107 | 0.618175  |
| 6  | 3.874755  | 0.216883  | -1.57199  |
| 6  | 5.390051  | -0.937929 | -0.068441 |
| 1  | 4.441431  | -2.128339 | 1.473441  |
| 6  | 5.172416  | -0.094453 | -1.15691  |
| 1  | 3.725671  | 0.887646  | -2.408423 |
| 1  | 6.39816   | -1.173599 | 0.25524   |
| 1  | 6.013599  | 0.336734  | -1.689936 |
| 8  | 1.46521   | -0.08728  | -1.241248 |
| 6  | 1.190131  | 0.788351  | -2.360375 |
| 1  | 1.679925  | 0.409221  | -3.260334 |
| 1  | 0.108617  | 0.74936   | -2.493591 |
| 1  | 1.519373  | 1.804992  | -2.130162 |
| 6  | -1.937802 | -2.976952 | 0.198011  |
| 1  | -2.376225 | -3.942275 | 0.485262  |
| 1  | -1.427849 | -3.11657  | -0.762139 |
| 1  | -1.185352 | -2.725004 | 0.953708  |
| 6  | -3.611708 | -1.67492  | 1.523747  |
| 1  | -4.454283 | -0.978023 | 1.518776  |
| 1  | -3.980669 | -2.626158 | 1.934513  |
| 1  | -2.854139 | -1.283566 | 2.210912  |
| 6  | -4.155553 | -2.443503 | -0.807863 |
| 1  | -3.765386 | -2.6746   | -1.803969 |
| 1  | -4.580737 | -3.36443  | -0.383655 |



|   |           |           |           |
|---|-----------|-----------|-----------|
| 1 | -4.972613 | -1.727748 | -0.928963 |
| 6 | -2.541359 | 2.30036   | -1.316516 |
| 1 | -2.568422 | 2.013609  | -2.373201 |
| 1 | -3.042551 | 3.271967  | -1.212879 |
| 1 | -1.494203 | 2.451128  | -1.023912 |
| 6 | -4.692268 | 1.08684   | -0.920876 |
| 1 | -5.266813 | 0.403284  | -0.288193 |
| 1 | -5.204367 | 2.059042  | -0.895339 |
| 1 | -4.728782 | 0.711955  | -1.948953 |
| 6 | -3.255479 | 1.775609  | 1.02328   |
| 1 | -3.727862 | 1.07351   | 1.713976  |
| 1 | -2.245211 | 1.982759  | 1.391318  |
| 1 | -3.821192 | 2.717665  | 1.074145  |

## INT2<sub>II</sub>

E = -4235.397607    ZPVE = 0.370827    NIMAG = 0.

|    |           |           |           |
|----|-----------|-----------|-----------|
| 17 | -1.866413 | 0.949934  | 1.871825  |
| 15 | 1.446204  | -1.256989 | 0.486054  |
| 12 | 0.138388  | 0.78478   | -0.006935 |
| 35 | 0.426083  | 3.087984  | -0.651295 |
| 6  | 2.955802  | -0.487649 | 1.426762  |
| 6  | 1.953981  | -1.826123 | -1.295778 |
| 6  | -2.879828 | -0.227526 | 1.040681  |
| 6  | -2.745395 | -0.376223 | -0.345937 |
| 6  | -3.815973 | -0.968496 | 1.754449  |
| 6  | -3.569485 | -1.279191 | -1.019266 |
| 6  | -4.638417 | -1.8705   | 1.075249  |
| 1  | -3.898297 | -0.833835 | 2.827304  |

|   |           |           |           |
|---|-----------|-----------|-----------|
| 6 | -4.516524 | -2.018414 | -0.306762 |
| 1 | -3.468703 | -1.413486 | -2.089739 |
| 1 | -5.370687 | -2.448925 | 1.628435  |
| 1 | -5.151575 | -2.718944 | -0.839226 |
| 8 | -1.765458 | 0.368485  | -0.974597 |
| 6 | -1.923903 | 0.682542  | -2.382073 |
| 1 | -2.945883 | 1.02179   | -2.564204 |
| 1 | -1.21996  | 1.492083  | -2.57614  |
| 1 | -1.685614 | -0.191752 | -2.993051 |
| 6 | 3.156898  | -2.789349 | -1.257087 |
| 1 | 3.330436  | -3.218121 | -2.254684 |
| 1 | 4.078873  | -2.28246  | -0.957778 |
| 1 | 2.982537  | -3.615585 | -0.560381 |
| 6 | 0.727987  | -2.617133 | -1.803178 |
| 1 | -0.174504 | -1.993438 | -1.837058 |
| 1 | 0.910935  | -2.988177 | -2.821391 |
| 1 | 0.510368  | -3.474544 | -1.158877 |
| 6 | 2.24841   | -0.690533 | -2.298551 |
| 1 | 2.440814  | -1.101922 | -3.30126  |
| 1 | 1.406042  | 0.007794  | -2.387961 |
| 1 | 3.122038  | -0.101198 | -2.011706 |
| 6 | 3.776058  | -1.61694  | 2.088492  |
| 1 | 4.23628   | -2.275659 | 1.346748  |
| 1 | 4.583964  | -1.191807 | 2.7016    |
| 1 | 3.145207  | -2.234956 | 2.735308  |
| 6 | 2.333449  | 0.368171  | 2.552286  |
| 1 | 3.114131  | 0.711435  | 3.244616  |
| 1 | 1.843887  | 1.268648  | 2.156734  |
| 1 | 1.598999  | -0.199571 | 3.13547   |
| 6 | 3.895854  | 0.405449  | 0.596861  |

|   |          |           |          |
|---|----------|-----------|----------|
| 1 | 4.420466 | -0.160816 | -0.17818 |
| 1 | 3.359347 | 1.228485  | 0.113534 |
| 1 | 4.663493 | 0.847728  | 1.248494 |

**TS2<sub>II</sub>**

E = -4235.355712    ZPVE = 0.370440    NIMAG = 1.

|    |           |           |           |
|----|-----------|-----------|-----------|
| 17 | 0.554706  | 0.856265  | 2.34963   |
| 15 | -0.996062 | -0.877466 | -0.133638 |
| 12 | 1.378708  | -0.450261 | 0.410163  |
| 35 | 3.519073  | -1.420463 | -0.00022  |
| 6  | -2.134397 | -1.891496 | 1.035998  |
| 6  | -1.600624 | -0.910843 | -1.950014 |
| 6  | -0.514976 | 1.775255  | 0.813707  |
| 6  | 0.360132  | 2.288807  | -0.152558 |
| 6  | -1.606756 | 2.522073  | 1.242135  |
| 6  | 0.084856  | 3.501485  | -0.773668 |
| 6  | -1.891596 | 3.736638  | 0.606734  |
| 1  | -2.239233 | 2.156503  | 2.042907  |
| 6  | -1.054245 | 4.227527  | -0.396329 |
| 1  | 0.736223  | 3.880579  | -1.553417 |
| 1  | -2.765865 | 4.301415  | 0.916436  |
| 1  | -1.265874 | 5.177038  | -0.876223 |
| 8  | 1.446718  | 1.475008  | -0.468029 |
| 6  | 2.485452  | 1.984664  | -1.329042 |
| 1  | 2.864872  | 2.928878  | -0.929552 |
| 1  | 3.268213  | 1.226716  | -1.320194 |
| 1  | 2.098799  | 2.121047  | -2.343039 |
| 6  | -3.098    | -0.572496 | -2.087494 |

|   |           |           |           |
|---|-----------|-----------|-----------|
| 1 | -3.364431 | -0.514183 | -3.151509 |
| 1 | -3.740932 | -1.332063 | -1.635463 |
| 1 | -3.33472  | 0.392578  | -1.628579 |
| 6 | -0.794079 | 0.17962   | -2.688448 |
| 1 | 0.284997  | -0.000977 | -2.629245 |
| 1 | -1.065674 | 0.171467  | -3.751931 |
| 1 | -1.003558 | 1.178206  | -2.296333 |
| 6 | -1.295225 | -2.265158 | -2.629273 |
| 1 | -1.563493 | -2.209254 | -3.694024 |
| 1 | -0.231123 | -2.511662 | -2.56242  |
| 1 | -1.858298 | -3.090737 | -2.190714 |
| 6 | -3.367569 | -1.06358  | 1.45677   |
| 1 | -3.99268  | -0.789478 | 0.60321   |
| 1 | -3.988702 | -1.64675  | 2.150623  |
| 1 | -3.071667 | -0.142688 | 1.967171  |
| 6 | -1.313814 | -2.234945 | 2.297653  |
| 1 | -1.936621 | -2.828145 | 2.980102  |
| 1 | -0.429863 | -2.834131 | 2.052586  |
| 1 | -0.992016 | -1.342684 | 2.838772  |
| 6 | -2.595708 | -3.221517 | 0.405486  |
| 1 | -3.245014 | -3.075429 | -0.460831 |
| 1 | -1.746727 | -3.841358 | 0.101608  |
| 1 | -3.172168 | -3.786328 | 1.150963  |

**PC<sub>II</sub>**

E = -4235.495390    ZPVE = 0.373775    NIMAG = 0.

|    |           |          |           |
|----|-----------|----------|-----------|
| 17 | 1.54612   | 0.605579 | 3.008422  |
| 15 | -0.735744 | -0.74527 | -0.008211 |

|    |           |           |           |
|----|-----------|-----------|-----------|
| 12 | 1.577649  | 0.137835  | 0.787581  |
| 35 | 3.42647   | -0.393569 | -0.670261 |
| 6  | -1.694656 | -1.716822 | 1.339476  |
| 6  | -0.828583 | -1.522991 | -1.757494 |
| 6  | -1.52553  | 0.915975  | -0.209543 |
| 6  | -0.686584 | 2.052351  | -0.278618 |
| 6  | -2.909724 | 1.131426  | -0.287884 |
| 6  | -1.216556 | 3.337848  | -0.411589 |
| 6  | -3.452466 | 2.410337  | -0.423383 |
| 1  | -3.580844 | 0.281421  | -0.241005 |
| 6  | -2.600133 | 3.511638  | -0.482796 |
| 1  | -0.567558 | 4.203511  | -0.450395 |
| 1  | -4.52833  | 2.541461  | -0.479662 |
| 1  | -3.003873 | 4.514507  | -0.582624 |
| 8  | 0.683961  | 1.838367  | -0.210078 |
| 6  | 1.587389  | 2.920256  | -0.533506 |
| 1  | 1.556832  | 3.687334  | 0.244683  |
| 1  | 2.576266  | 2.463951  | -0.584491 |
| 1  | 1.326464  | 3.337944  | -1.509263 |
| 6  | -2.24646  | -1.61997  | -2.349984 |
| 1  | -2.171096 | -2.012839 | -3.37173  |
| 1  | -2.899031 | -2.291807 | -1.790197 |
| 1  | -2.727723 | -0.639944 | -2.415436 |
| 6  | 0.020931  | -0.612133 | -2.673488 |
| 1  | 1.054678  | -0.521659 | -2.329217 |
| 1  | 0.040876  | -1.050908 | -3.678637 |
| 1  | -0.4114   | 0.389625  | -2.762356 |
| 6  | -0.173772 | -2.91882  | -1.701602 |
| 1  | -0.101681 | -3.317826 | -2.72056  |
| 1  | 0.841073  | -2.873478 | -1.294306 |

|   |           |           |           |
|---|-----------|-----------|-----------|
| 1 | -0.758916 | -3.632196 | -1.113779 |
| 6 | -2.972564 | -2.443983 | 0.88274   |
| 1 | -2.764396 | -3.234111 | 0.156517  |
| 1 | -3.433373 | -2.920221 | 1.75704   |
| 1 | -3.716792 | -1.76795  | 0.45303   |
| 6 | -2.037989 | -0.731226 | 2.478364  |
| 1 | -2.41349  | -1.308573 | 3.332133  |
| 1 | -1.161501 | -0.172304 | 2.818893  |
| 1 | -2.815187 | -0.018847 | 2.190795  |
| 6 | -0.691259 | -2.759626 | 1.891653  |
| 1 | -0.353856 | -3.466222 | 1.12811   |
| 1 | 0.185894  | -2.278964 | 2.334753  |
| 1 | -1.183091 | -3.339303 | 2.682411  |

**R1<sub>III</sub> + b** S<sub>N</sub>2@Cl pathway, followed by S<sub>N</sub>2@C pathway, in the gas phase

**RC<sub>III</sub>**

E = -4383.014977      ZPVE = 0.307981      NIMAG = 0.

|    |           |           |           |
|----|-----------|-----------|-----------|
| 17 | -0.049706 | 0.541147  | 0.599169  |
| 15 | -1.798121 | 0.076037  | -0.672851 |
| 12 | 2.064898  | -0.798579 | -0.222743 |
| 35 | 1.038091  | -2.358684 | -1.739335 |
| 6  | 3.544252  | -0.076682 | 1.093281  |
| 6  | 4.014443  | 0.85863   | 0.164163  |
| 6  | 4.212865  | -0.086803 | 2.32234   |
| 6  | 5.062983  | 1.749801  | 0.368303  |
| 6  | 5.278476  | 0.789148  | 2.589781  |
| 1  | 3.908226  | -0.786246 | 3.099021  |
| 6  | 5.699058  | 1.69934   | 1.618404  |
| 1  | 5.39118   | 2.457258  | -0.386564 |

|   |           |           |           |
|---|-----------|-----------|-----------|
| 1 | 5.780444  | 0.759214  | 3.553382  |
| 1 | 6.524059  | 2.375936  | 1.822986  |
| 8 | 3.26558   | 0.783403  | -1.045157 |
| 6 | 3.644097  | 1.556489  | -2.182625 |
| 1 | 4.67201   | 1.321665  | -2.479985 |
| 1 | 2.957207  | 1.281103  | -2.983501 |
| 1 | 3.553675  | 2.626921  | -1.968138 |
| 6 | -2.75359  | 1.628853  | -0.410166 |
| 6 | -2.827879 | 2.366256  | 0.78397   |
| 6 | -3.454857 | 2.085174  | -1.53918  |
| 6 | -3.60014  | 3.526375  | 0.846942  |
| 1 | -2.273949 | 2.041783  | 1.659311  |
| 6 | -4.246677 | 3.234868  | -1.466547 |
| 1 | -3.382759 | 1.5413    | -2.477958 |
| 6 | -4.315651 | 3.959352  | -0.275283 |
| 1 | -3.643982 | 4.093286  | 1.772398  |
| 1 | -4.791297 | 3.570859  | -2.343907 |
| 1 | -4.91766  | 4.861662  | -0.220712 |
| 6 | -2.638531 | -1.139579 | 0.423323  |
| 6 | -3.766013 | -0.856799 | 1.213546  |
| 6 | -2.147409 | -2.459533 | 0.374834  |
| 6 | -4.377769 | -1.869123 | 1.955639  |
| 1 | -4.173618 | 0.147217  | 1.246866  |
| 6 | -2.753955 | -3.461547 | 1.132295  |
| 1 | -1.288924 | -2.698144 | -0.247336 |
| 6 | -3.870078 | -3.170411 | 1.92228   |
| 1 | -5.250697 | -1.639184 | 2.559826  |
| 1 | -2.359876 | -4.472846 | 1.096539  |
| 1 | -4.345591 | -3.955027 | 2.50376   |

**TS1m**

E = -4382.947218    ZPVE = 0.307195    NIMAG = 1.

|    |           |           |           |
|----|-----------|-----------|-----------|
| 17 | 0.294792  | -1.02053  | -0.165799 |
| 15 | -1.77412  | 0.35213   | 0.683714  |
| 12 | 1.383244  | 0.831436  | 0.609202  |
| 35 | 1.487445  | 2.989473  | 1.55754   |
| 6  | 2.377901  | -1.891727 | -0.696408 |
| 6  | 3.500213  | -1.15096  | -0.374862 |
| 6  | 2.532424  | -3.137568 | -1.285889 |
| 6  | 4.792533  | -1.616433 | -0.628938 |
| 6  | 3.816028  | -3.638483 | -1.556213 |
| 1  | 1.658003  | -3.73319  | -1.542794 |
| 6  | 4.936758  | -2.875845 | -1.226357 |
| 1  | 5.679312  | -1.042851 | -0.382315 |
| 1  | 3.936928  | -4.614077 | -2.019786 |
| 1  | 5.935109  | -3.251127 | -1.429828 |
| 8  | 3.274237  | 0.130804  | 0.23129   |
| 6  | 4.430395  | 0.940925  | 0.555231  |
| 1  | 4.993578  | 1.161032  | -0.355259 |
| 1  | 4.040953  | 1.861108  | 0.989966  |
| 1  | 5.058888  | 0.416249  | 1.279239  |
| 6  | -2.928815 | -1.047708 | 0.949106  |
| 6  | -2.502687 | -2.153806 | 1.71106   |
| 6  | -4.279541 | -0.999134 | 0.550317  |
| 6  | -3.386647 | -3.180369 | 2.044692  |
| 1  | -1.467755 | -2.218445 | 2.035372  |
| 6  | -5.161809 | -2.028092 | 0.885476  |
| 1  | -4.646232 | -0.149811 | -0.017214 |



|   |           |           |           |
|---|-----------|-----------|-----------|
| 6 | -4.721472 | -3.124474 | 1.632285  |
| 1 | -3.030429 | -4.026401 | 2.625966  |
| 1 | -6.198494 | -1.968213 | 0.565119  |
| 1 | -5.409478 | -3.923985 | 1.891065  |
| 6 | -2.263392 | 1.100426  | -0.917524 |
| 6 | -2.741359 | 0.384255  | -2.033548 |
| 6 | -2.049042 | 2.487203  | -1.057734 |
| 6 | -3.012227 | 1.035895  | -3.236381 |
| 1 | -2.894856 | -0.68806  | -1.960179 |
| 6 | -2.318044 | 3.137439  | -2.264787 |
| 1 | -1.683075 | 3.060647  | -0.20972  |
| 6 | -2.80098  | 2.41459   | -3.35827  |
| 1 | -3.380591 | 0.465657  | -4.08498  |
| 1 | -2.153044 | 4.208105  | -2.347145 |
| 1 | -3.013276 | 2.918401  | -4.296808 |

**INT<sub>III</sub>**

E = -4383.005103      ZPVE = 0.308720      NIMAG = 0.

|    |           |           |           |
|----|-----------|-----------|-----------|
| 17 | 0.195978  | 2.680915  | -1.247186 |
| 15 | -0.334016 | -1.802723 | -1.443179 |
| 12 | 1.150842  | 0.135198  | -0.998093 |
| 35 | 3.47391   | 0.503885  | -1.45868  |
| 6  | -0.467897 | 2.744241  | 0.387746  |
| 6  | 0.037664  | 1.873396  | 1.361965  |
| 6  | -1.477382 | 3.653119  | 0.682198  |
| 6  | -0.475284 | 1.938138  | 2.658816  |
| 6  | -1.98531  | 3.712955  | 1.981826  |
| 1  | -1.852756 | 4.307958  | -0.096374 |

|   |           |           |           |
|---|-----------|-----------|-----------|
| 6 | -1.479597 | 2.860287  | 2.963574  |
| 1 | -0.103469 | 1.265341  | 3.422225  |
| 1 | -2.769552 | 4.423689  | 2.219474  |
| 1 | -1.872176 | 2.898792  | 3.974521  |
| 8 | 1.014931  | 0.981421  | 0.974705  |
| 6 | 1.91478   | 0.446397  | 1.987414  |
| 1 | 1.411763  | -0.34011  | 2.552908  |
| 1 | 2.759728  | 0.040191  | 1.432429  |
| 1 | 2.249961  | 1.262455  | 2.630986  |
| 6 | -2.1111   | -1.31963  | -1.263779 |
| 6 | -2.584301 | -0.078189 | -1.728484 |
| 6 | -3.07033  | -2.257374 | -0.82889  |
| 6 | -3.950702 | 0.216037  | -1.759069 |
| 1 | -1.879192 | 0.665739  | -2.089322 |
| 6 | -4.432995 | -1.955963 | -0.832505 |
| 1 | -2.746236 | -3.239391 | -0.495572 |
| 6 | -4.88315  | -0.716523 | -1.299979 |
| 1 | -4.284134 | 1.180419  | -2.133855 |
| 1 | -5.146977 | -2.698289 | -0.485293 |
| 1 | -5.944599 | -0.486777 | -1.314562 |
| 6 | 0.162894  | -2.441572 | 0.232615  |
| 6 | -0.586777 | -2.33398  | 1.42302   |
| 6 | 1.426409  | -3.070612 | 0.317915  |
| 6 | -0.097809 | -2.833022 | 2.633926  |
| 1 | -1.564224 | -1.861779 | 1.402412  |
| 6 | 1.923316  | -3.546497 | 1.532262  |
| 1 | 2.021125  | -3.198567 | -0.583891 |
| 6 | 1.163053  | -3.435615 | 2.701752  |
| 1 | -0.708725 | -2.749707 | 3.529969  |
| 1 | 2.899986  | -4.022557 | 1.559844  |

|   |          |           |          |
|---|----------|-----------|----------|
| 1 | 1.538793 | -3.825379 | 3.643289 |
|---|----------|-----------|----------|

**TS2<sub>III</sub>**

E = -4382.967060    ZPVE = 0.307141    NIMAG = 1.

|    |           |           |           |
|----|-----------|-----------|-----------|
| 17 | 0.598026  | -2.300952 | 1.360033  |
| 15 | -0.561779 | -0.103677 | -0.995824 |
| 12 | 1.698425  | -0.893756 | -0.289495 |
| 35 | 3.700135  | -1.007686 | -1.557917 |
| 6  | -0.142628 | -0.419764 | 1.809863  |
| 6  | 0.861484  | 0.507835  | 2.114858  |
| 6  | -1.328888 | -0.446728 | 2.533365  |
| 6  | 0.650572  | 1.477129  | 3.086314  |
| 6  | -1.542836 | 0.533647  | 3.511034  |
| 1  | -2.077888 | -1.202963 | 2.325769  |
| 6  | -0.5611   | 1.483928  | 3.794413  |
| 1  | 1.404701  | 2.229928  | 3.289184  |
| 1  | -2.479079 | 0.53331   | 4.061305  |
| 1  | -0.723769 | 2.229946  | 4.564844  |
| 8  | 1.998501  | 0.424953  | 1.309854  |
| 6  | 3.173548  | 1.190646  | 1.649263  |
| 1  | 3.941796  | 0.873948  | 0.94435   |
| 1  | 2.971198  | 2.258936  | 1.533069  |
| 1  | 3.474927  | 0.964717  | 2.675288  |
| 6  | -0.921788 | 1.659605  | -1.213649 |
| 6  | -2.126496 | 2.162702  | -1.747919 |
| 6  | 0.107133  | 2.582425  | -0.92683  |
| 6  | -2.297764 | 3.530257  | -1.962154 |
| 1  | -2.925705 | 1.480589  | -2.016755 |

|   |           |           |           |
|---|-----------|-----------|-----------|
| 6 | -0.065406 | 3.948015  | -1.149354 |
| 1 | 1.053977  | 2.227664  | -0.528908 |
| 6 | -1.272382 | 4.432576  | -1.661362 |
| 1 | -3.235001 | 3.891066  | -2.377055 |
| 1 | 0.745255  | 4.6349    | -0.922098 |
| 1 | -1.409179 | 5.496277  | -1.831118 |
| 6 | -2.099529 | -1.055842 | -0.872568 |
| 6 | -2.095657 | -2.383642 | -1.348174 |
| 6 | -3.279455 | -0.567466 | -0.27338  |
| 6 | -3.234717 | -3.182143 | -1.254974 |
| 1 | -1.201512 | -2.781676 | -1.819852 |
| 6 | -4.420905 | -1.36828  | -0.189885 |
| 1 | -3.30543  | 0.439266  | 0.130052  |
| 6 | -4.406249 | -2.676433 | -0.681569 |
| 1 | -3.210357 | -4.197753 | -1.639716 |
| 1 | -5.322649 | -0.967904 | 0.26582   |
| 1 | -5.296484 | -3.295254 | -0.618933 |

**PCIII**

E = -4383.097268      ZPVE = 0.310504      NIMAG = 0.

|    |           |           |           |
|----|-----------|-----------|-----------|
| 17 | 1.250288  | -2.872418 | -1.836466 |
| 15 | -0.595408 | 0.143535  | -0.192186 |
| 12 | 1.70689   | -0.828086 | -0.97412  |
| 35 | 3.416667  | 0.82673   | -1.325212 |
| 6  | -0.674169 | -0.912723 | 1.319669  |
| 6  | 0.544451  | -1.359603 | 1.869483  |
| 6  | -1.865349 | -1.326645 | 1.927767  |
| 6  | 0.573439  | -2.161073 | 3.009875  |

|   |           |           |           |
|---|-----------|-----------|-----------|
| 6 | -1.8514   | -2.131587 | 3.069625  |
| 1 | -2.813199 | -1.017908 | 1.497541  |
| 6 | -0.631755 | -2.539259 | 3.609207  |
| 1 | 1.513011  | -2.50656  | 3.423569  |
| 1 | -2.785478 | -2.439327 | 3.528563  |
| 1 | -0.607355 | -3.167518 | 4.494348  |
| 8 | 1.701002  | -0.977367 | 1.198506  |
| 6 | 2.975982  | -1.078158 | 1.875109  |
| 1 | 3.679316  | -0.539915 | 1.23935   |
| 1 | 2.908073  | -0.597469 | 2.854072  |
| 1 | 3.271151  | -2.126625 | 1.972175  |
| 6 | -0.620559 | 1.871751  | 0.433855  |
| 6 | 0.00603   | 2.853371  | -0.351744 |
| 6 | -1.214681 | 2.242712  | 1.650919  |
| 6 | 0.014972  | 4.187074  | 0.062144  |
| 1 | 0.506961  | 2.575098  | -1.274262 |
| 6 | -1.198047 | 3.576526  | 2.064678  |
| 1 | -1.682891 | 1.49289   | 2.280931  |
| 6 | -0.586514 | 4.550423  | 1.269616  |
| 1 | 0.506901  | 4.935654  | -0.55145  |
| 1 | -1.658703 | 3.852784  | 3.008827  |
| 1 | -0.571032 | 5.586434  | 1.59531   |
| 6 | -2.196412 | -0.139102 | -1.044735 |
| 6 | -2.297295 | -1.272901 | -1.870812 |
| 6 | -3.292279 | 0.728597  | -0.923601 |
| 6 | -3.491314 | -1.543695 | -2.540957 |
| 1 | -1.44773  | -1.941301 | -1.988145 |
| 6 | -4.479704 | 0.458731  | -1.609894 |
| 1 | -3.219992 | 1.617521  | -0.305004 |
| 6 | -4.583166 | -0.67961  | -2.41322  |

|   |           |           |           |
|---|-----------|-----------|-----------|
| 1 | -3.561408 | -2.424456 | -3.172184 |
| 1 | -5.321597 | 1.138354  | -1.51435  |
| 1 | -5.507212 | -0.888145 | -2.94466  |

**R1<sub>IV</sub> + b S<sub>N2</sub>@Cl pathway, followed by S<sub>N2</sub>@C pathway, in the gas phase**

**RC<sub>IV</sub>**

E = -4191.271037      ZPVE = 0.254249      NIMAG = 0.

|    |           |           |           |
|----|-----------|-----------|-----------|
| 17 | -0.29682  | -1.150674 | -0.810898 |
| 15 | -2.119913 | -0.201403 | -1.611741 |
| 12 | 1.248983  | 0.649531  | 0.374098  |
| 35 | -0.174628 | 2.585247  | 0.367443  |
| 6  | -2.537862 | -1.553345 | -2.811054 |
| 1  | -1.809312 | -1.520572 | -3.625238 |
| 1  | -2.540466 | -2.557702 | -2.380774 |
| 1  | -3.526989 | -1.332145 | -3.228235 |
| 6  | 2.79032   | -0.611804 | 1.059712  |
| 6  | 3.611046  | -0.332118 | -0.038605 |
| 6  | 3.331519  | -1.494748 | 2.000595  |
| 6  | 4.883481  | -0.851186 | -0.255234 |
| 6  | 4.609638  | -2.055076 | 1.837461  |
| 1  | 2.756383  | -1.76273  | 2.885244  |
| 6  | 5.377734  | -1.734989 | 0.716601  |
| 1  | 5.482851  | -0.601176 | -1.124844 |
| 1  | 5.005116  | -2.738367 | 2.5845    |
| 1  | 6.366876  | -2.165936 | 0.589511  |
| 8  | 2.967425  | 0.577624  | -0.926377 |
| 6  | 3.654279  | 1.076765  | -2.072573 |
| 1  | 3.898753  | 0.260062  | -2.760649 |

|   |           |           |           |
|---|-----------|-----------|-----------|
| 1 | 2.974926  | 1.777939  | -2.558309 |
| 1 | 4.57043   | 1.597723  | -1.773586 |
| 6 | -3.2844   | -0.512588 | -0.22585  |
| 6 | -4.090213 | -1.656801 | -0.089485 |
| 6 | -3.392224 | 0.516594  | 0.729159  |
| 6 | -4.988478 | -1.766167 | 0.972387  |
| 1 | -4.025578 | -2.468385 | -0.806381 |
| 6 | -4.283549 | 0.397157  | 1.796984  |
| 1 | -2.762674 | 1.398193  | 0.646307  |
| 6 | -5.084226 | -0.740937 | 1.918841  |
| 1 | -5.609264 | -2.65271  | 1.06424   |
| 1 | -4.351926 | 1.194535  | 2.530876  |
| 1 | -5.782096 | -0.829762 | 2.74641   |

**TS1iv**

E = -4191.201610    ZPVE = 0.253751    NIMAG = 1.

|    |           |           |           |
|----|-----------|-----------|-----------|
| 17 | -0.29244  | -1.236869 | 0.836702  |
| 15 | 2.086592  | -0.384866 | 1.563704  |
| 12 | -0.502987 | 0.988338  | 0.392097  |
| 35 | 0.197258  | 3.242975  | 0.283458  |
| 6  | 2.416394  | -1.86781  | 2.643241  |
| 1  | 1.82921   | -1.752899 | 3.558666  |
| 1  | 2.139606  | -2.817278 | 2.174634  |
| 1  | 3.475532  | -1.901455 | 2.921172  |
| 6  | -2.469416 | -1.538372 | 0.12968   |
| 6  | -3.139622 | -0.427952 | -0.350305 |
| 6  | -3.103984 | -2.771485 | 0.121916  |
| 6  | -4.447418 | -0.507103 | -0.835997 |

|   |           |           |           |
|---|-----------|-----------|-----------|
| 6 | -4.418453 | -2.888896 | -0.357298 |
| 1 | -2.586146 | -3.655358 | 0.490901  |
| 6 | -5.080774 | -1.757162 | -0.833462 |
| 1 | -4.984387 | 0.356414  | -1.212798 |
| 1 | -4.916636 | -3.854907 | -0.360634 |
| 1 | -6.096889 | -1.833298 | -1.208538 |
| 8 | -2.429013 | 0.820049  | -0.321636 |
| 6 | -3.106819 | 1.992343  | -0.83575  |
| 1 | -4.009651 | 2.184956  | -0.250769 |
| 1 | -2.404961 | 2.818609  | -0.727256 |
| 1 | -3.3557   | 1.842152  | -1.889466 |
| 6 | 3.008637  | -0.741339 | 0.027834  |
| 6 | 3.661044  | -1.954934 | -0.267652 |
| 6 | 3.071866  | 0.293247  | -0.932999 |
| 6 | 4.347737  | -2.125564 | -1.471408 |
| 1 | 3.637502  | -2.77457  | 0.443269  |
| 6 | 3.753807  | 0.118179  | -2.13657  |
| 1 | 2.613261  | 1.256491  | -0.717109 |
| 6 | 4.394583  | -1.094201 | -2.413971 |
| 1 | 4.846287  | -3.06967  | -1.67443  |
| 1 | 3.793348  | 0.932237  | -2.855196 |
| 1 | 4.930665  | -1.229942 | -3.348621 |

#### INT<sub>IV</sub>

E = -4191.258527    ZPVE = 0.255371    NIMAG = 0.

|    |           |           |           |
|----|-----------|-----------|-----------|
| 17 | 2.332086  | 1.573032  | -0.876445 |
| 15 | -1.304889 | -0.393577 | -2.301181 |
| 12 | -0.360537 | 1.150339  | -0.608083 |



|    |           |           |           |
|----|-----------|-----------|-----------|
| 35 | -1.035603 | 3.133057  | 0.559195  |
| 6  | 0.103734  | -1.532354 | -2.81606  |
| 1  | 0.691175  | -1.002685 | -3.572905 |
| 1  | 0.781627  | -1.835934 | -2.010447 |
| 1  | -0.294142 | -2.437356 | -3.288578 |
| 6  | 2.779314  | 0.065168  | -0.076724 |
| 6  | 1.874655  | -0.519707 | 0.820973  |
| 6  | 4.022298  | -0.506596 | -0.325452 |
| 6  | 2.239591  | -1.696336 | 1.479103  |
| 6  | 4.379576  | -1.684061 | 0.335968  |
| 1  | 4.699208  | -0.030054 | -1.026012 |
| 6  | 3.490297  | -2.269838 | 1.237328  |
| 1  | 1.54873   | -2.170494 | 2.165467  |
| 1  | 5.349585  | -2.131851 | 0.148024  |
| 1  | 3.760316  | -3.185347 | 1.753631  |
| 8  | 0.654749  | 0.097695  | 0.987474  |
| 6  | -0.134455 | -0.212415 | 2.169934  |
| 1  | 0.508272  | -0.163498 | 3.051541  |
| 1  | -0.891598 | 0.5694    | 2.218081  |
| 1  | -0.60103  | -1.193624 | 2.060128  |
| 6  | -2.065747 | -1.310654 | -0.880763 |
| 6  | -1.691272 | -2.604553 | -0.458548 |
| 6  | -3.125412 | -0.686611 | -0.178557 |
| 6  | -2.333255 | -3.233416 | 0.614053  |
| 1  | -0.898762 | -3.1359   | -0.976484 |
| 6  | -3.757103 | -1.310516 | 0.896237  |
| 1  | -3.46675  | 0.299034  | -0.490146 |
| 6  | -3.360834 | -2.589312 | 1.308472  |
| 1  | -2.026681 | -4.235534 | 0.905237  |
| 1  | -4.565331 | -0.798174 | 1.411554  |

|   |           |           |          |
|---|-----------|-----------|----------|
| 1 | -3.860495 | -3.081306 | 2.137793 |
|---|-----------|-----------|----------|

**TS2<sub>iv</sub>**

E = -4191.221274    ZPVE = 0.253766    NIMAG = 1.

|    |           |           |           |
|----|-----------|-----------|-----------|
| 17 | 1.204392  | 2.539073  | 0.997126  |
| 15 | -0.356765 | -0.517352 | 1.704646  |
| 12 | 1.650082  | 0.216049  | 0.40555   |
| 35 | 3.597705  | -1.064204 | -0.062364 |
| 6  | -1.363091 | 0.398789  | 2.953402  |
| 1  | -0.689518 | 1.035534  | 3.533252  |
| 1  | -2.13323  | 1.031837  | 2.494788  |
| 1  | -1.843095 | -0.303233 | 3.641959  |
| 6  | -0.563812 | 1.902272  | 0.124153  |
| 6  | -0.416498 | 1.432757  | -1.189377 |
| 6  | -1.6581   | 2.684835  | 0.475313  |
| 6  | -1.404008 | 1.669971  | -2.134563 |
| 6  | -2.65852  | 2.921086  | -0.479321 |
| 1  | -1.730683 | 3.112675  | 1.469408  |
| 6  | -2.532506 | 2.425157  | -1.775237 |
| 1  | -1.320449 | 1.260381  | -3.135136 |
| 1  | -3.523348 | 3.515809  | -0.200647 |
| 1  | -3.298709 | 2.622875  | -2.517135 |
| 8  | 0.72386   | 0.666154  | -1.408902 |
| 6  | 1.00272   | 0.150944  | -2.727505 |
| 1  | 1.954413  | -0.371915 | -2.637865 |
| 1  | 0.213278  | -0.542812 | -3.028761 |
| 1  | 1.085756  | 0.979318  | -3.435687 |
| 6  | -1.507136 | -1.549917 | 0.763177  |

|   |           |           |           |
|---|-----------|-----------|-----------|
| 6 | -2.90922  | -1.500658 | 0.90206   |
| 6 | -0.966107 | -2.471728 | -0.16293  |
| 6 | -3.733473 | -2.336336 | 0.145098  |
| 1 | -3.363447 | -0.806238 | 1.601312  |
| 6 | -1.792149 | -3.300808 | -0.918147 |
| 1 | 0.113529  | -2.556097 | -0.27098  |
| 6 | -3.183225 | -3.239344 | -0.768181 |
| 1 | -4.811379 | -2.280797 | 0.271782  |
| 1 | -1.350276 | -4.007289 | -1.615682 |
| 1 | -3.826831 | -3.890804 | -1.351736 |

**PC<sub>IV</sub>**

E = -4191.352509    ZPVE = 0.257517    NIMAG = 0.

|    |           |           |           |
|----|-----------|-----------|-----------|
| 17 | 2.665841  | 1.389052  | 2.166649  |
| 15 | -0.721631 | 0.072706  | 1.05997   |
| 12 | 1.840052  | -0.019293 | 0.602841  |
| 35 | 2.615756  | -1.990589 | -0.552093 |
| 6  | -1.383116 | 0.477153  | 2.73282   |
| 1  | -0.780092 | 1.284976  | 3.155483  |
| 1  | -2.436836 | 0.767323  | 2.725813  |
| 1  | -1.269248 | -0.408536 | 3.363915  |
| 6  | -1.019098 | 1.601878  | 0.064482  |
| 6  | -0.074957 | 1.945918  | -0.925062 |
| 6  | -2.110731 | 2.459465  | 0.252957  |
| 6  | -0.231283 | 3.090362  | -1.708232 |
| 6  | -2.28001  | 3.607957  | -0.522515 |
| 1  | -2.844536 | 2.230878  | 1.019318  |
| 6  | -1.338396 | 3.916996  | -1.503342 |

|   |           |           |           |
|---|-----------|-----------|-----------|
| 1 | 0.503533  | 3.35447   | -2.458441 |
| 1 | -3.135753 | 4.254672  | -0.357714 |
| 1 | -1.452953 | 4.808915  | -2.111641 |
| 8 | 1.021006  | 1.102321  | -1.072631 |
| 6 | 1.811616  | 1.186122  | -2.28253  |
| 1 | 2.439501  | 0.295065  | -2.276236 |
| 1 | 1.151014  | 1.171102  | -3.152727 |
| 1 | 2.424666  | 2.091481  | -2.271937 |
| 6 | -1.855609 | -1.206484 | 0.379335  |
| 6 | -3.254676 | -1.084652 | 0.420319  |
| 6 | -1.282649 | -2.360371 | -0.178998 |
| 6 | -4.06705  | -2.099737 | -0.084829 |
| 1 | -3.719026 | -0.199793 | 0.846207  |
| 6 | -2.100596 | -3.373103 | -0.689797 |
| 1 | -0.20193  | -2.465559 | -0.227712 |
| 6 | -3.489618 | -3.246829 | -0.640769 |
| 1 | -5.14759  | -1.99625  | -0.046785 |
| 1 | -1.645815 | -4.260506 | -1.119481 |
| 1 | -4.122846 | -4.03718  | -1.033472 |

**R1<sub>v</sub> + b** S<sub>N</sub>2@Cl pathway, followed by S<sub>N</sub>2@C pathway, in the gas phase

**RC<sub>v</sub>**

E = -3999.526806      ZPVE = 0.200592      NIMAG = 0.

|    |           |           |           |
|----|-----------|-----------|-----------|
| 17 | 1.082577  | -1.553256 | -0.089319 |
| 15 | 3.192329  | -1.192029 | 0.318256  |
| 12 | -0.383842 | 0.629754  | 0.494912  |
| 35 | 1.379582  | 2.250651  | 0.599359  |
| 6  | 3.804251  | -2.873807 | -0.176271 |

|   |           |           |           |
|---|-----------|-----------|-----------|
| 1 | 3.456077  | -3.622252 | 0.540198  |
| 1 | 3.499878  | -3.163866 | -1.186152 |
| 1 | 4.899838  | -2.843521 | -0.128355 |
| 6 | 3.621476  | -0.240054 | -1.209927 |
| 1 | 4.710671  | -0.107054 | -1.210041 |
| 1 | 3.320461  | -0.746458 | -2.131727 |
| 1 | 3.155401  | 0.745941  | -1.146945 |
| 6 | -2.240944 | -0.288049 | 0.862426  |
| 6 | -2.699061 | -0.051087 | -0.438246 |
| 6 | -3.155316 | -0.922214 | 1.710939  |
| 6 | -3.953218 | -0.392321 | -0.934029 |
| 6 | -4.436128 | -1.294223 | 1.269429  |
| 1 | -2.879076 | -1.136561 | 2.741786  |
| 6 | -4.829497 | -1.032366 | -0.044195 |
| 1 | -4.261231 | -0.185126 | -1.953878 |
| 1 | -5.125797 | -1.786416 | 1.950204  |
| 1 | -5.820129 | -1.318151 | -0.386352 |
| 8 | -1.696242 | 0.604574  | -1.211236 |
| 6 | -1.983391 | 1.054197  | -2.534524 |
| 1 | -2.826497 | 1.753616  | -2.526999 |
| 1 | -1.086601 | 1.563496  | -2.888774 |
| 1 | -2.210111 | 0.205268  | -3.18861  |

**TS1v**

E = -3999.451281    ZPVE = 0.200002    NIMAG = 1.

|    |           |           |          |
|----|-----------|-----------|----------|
| 17 | -0.09029  | -1.601231 | 0.000367 |
| 15 | -2.665774 | -1.684963 | -0.00034 |
| 12 | -0.636891 | 0.620971  | 0.000128 |

|    |           |           |           |
|----|-----------|-----------|-----------|
| 35 | -1.980832 | 2.567427  | 0.000233  |
| 6  | -2.837836 | -2.860413 | -1.437364 |
| 1  | -2.644466 | -2.325546 | -2.371814 |
| 1  | -2.145501 | -3.706558 | -1.3676   |
| 1  | -3.86209  | -3.249077 | -1.479701 |
| 6  | -2.838428 | -2.860488 | 1.436548  |
| 1  | -3.862759 | -3.248983 | 1.478561  |
| 1  | -2.146209 | -3.706741 | 1.366929  |
| 1  | -2.645245 | -2.325716 | 2.371092  |
| 6  | 2.153645  | -1.062558 | 0.0006    |
| 6  | 2.463593  | 0.285593  | -0.000081 |
| 6  | 3.186223  | -1.990639 | 0.000755  |
| 6  | 3.783972  | 0.744314  | -0.000562 |
| 6  | 4.525188  | -1.568735 | 0.000294  |
| 1  | 2.961758  | -3.056373 | 0.00125   |
| 6  | 4.815482  | -0.204304 | -0.000371 |
| 1  | 4.038697  | 1.798189  | -0.001092 |
| 1  | 5.331064  | -2.29833  | 0.00044   |
| 1  | 5.845979  | 0.138038  | -0.000747 |
| 8  | 1.357721  | 1.206887  | -0.000203 |
| 6  | 1.673875  | 2.620586  | -0.000578 |
| 1  | 2.243251  | 2.872412  | -0.899049 |
| 1  | 0.719024  | 3.144481  | -0.000388 |
| 1  | 2.243794  | 2.872751  | 0.897451  |

**INT1v**

E = -3999.488030    ZPVE = 0.201644    NIMAG = 0.

|    |           |           |           |
|----|-----------|-----------|-----------|
| 17 | -0.412704 | -1.419811 | -0.000147 |
|----|-----------|-----------|-----------|

|    |           |           |           |
|----|-----------|-----------|-----------|
| 15 | 3.443967  | -1.588037 | 0.000104  |
| 12 | 1.835874  | 0.30176   | 0.000146  |
| 35 | 1.63937   | 2.678444  | 0.000322  |
| 6  | 2.908619  | -2.678619 | 1.443311  |
| 1  | 3.086193  | -2.149667 | 2.385489  |
| 1  | 1.860292  | -2.993466 | 1.413949  |
| 1  | 3.533481  | -3.579158 | 1.453348  |
| 6  | 2.908818  | -2.678384 | -1.443355 |
| 1  | 3.53368   | -3.578922 | -1.453453 |
| 1  | 1.860487  | -2.993236 | -1.414188 |
| 1  | 3.086521  | -2.149278 | -2.385422 |
| 6  | -2.152249 | -1.070917 | -0.000233 |
| 6  | -2.586711 | 0.26572   | -0.000146 |
| 6  | -3.041978 | -2.137528 | -0.000385 |
| 6  | -3.9698   | 0.501917  | -0.000218 |
| 6  | -4.416934 | -1.884717 | -0.000455 |
| 1  | -2.660992 | -3.153134 | -0.000448 |
| 6  | -4.870869 | -0.566054 | -0.000371 |
| 1  | -4.343596 | 1.518365  | -0.000155 |
| 1  | -5.117413 | -2.713016 | -0.000574 |
| 1  | -5.936196 | -0.356928 | -0.000424 |
| 8  | -1.632682 | 1.225419  | 0         |
| 6  | -2.036671 | 2.599678  | 0.000091  |
| 1  | -2.620168 | 2.832518  | 0.89793   |
| 1  | -1.106109 | 3.16404   | 0.0002    |
| 1  | -2.62005  | 2.83267   | -0.897785 |

**INT2v**

E = -3999.505344    ZPVE = 0.202190    NIMAG = 0.

|    |           |           |           |
|----|-----------|-----------|-----------|
| 17 | 0.697454  | -0.47464  | 1.932788  |
| 15 | -0.916556 | 2.512346  | -0.719857 |
| 12 | -1.17064  | 0.148609  | -0.00656  |
| 35 | -2.695028 | -1.695848 | 0.231263  |
| 6  | -0.010854 | 3.357076  | 0.706094  |
| 1  | 0.997864  | 2.94065   | 0.79986   |
| 1  | 0.097563  | 4.425438  | 0.485801  |
| 1  | -0.514447 | 3.260933  | 1.674808  |
| 6  | -2.632587 | 3.261976  | -0.495192 |
| 1  | -3.037637 | 3.149356  | 0.516533  |
| 1  | -2.598302 | 4.331526  | -0.732874 |
| 1  | -3.329277 | 2.791525  | -1.196705 |
| 6  | 2.048334  | -0.365629 | 0.804557  |
| 6  | 1.813811  | -0.623298 | -0.553775 |
| 6  | 3.322904  | -0.060471 | 1.269607  |
| 6  | 2.881986  | -0.567434 | -1.45069  |
| 6  | 4.388375  | -0.008729 | 0.367009  |
| 1  | 3.473672  | 0.131263  | 2.326313  |
| 6  | 4.164011  | -0.263487 | -0.985894 |
| 1  | 2.718143  | -0.745995 | -2.506248 |
| 1  | 5.384066  | 0.22924   | 0.725727  |
| 1  | 4.98602   | -0.220916 | -1.693062 |
| 8  | 0.515162  | -0.895026 | -0.927072 |
| 6  | 0.261174  | -1.459049 | -2.23587  |
| 1  | 0.901257  | -2.330963 | -2.389275 |
| 1  | -0.784498 | -1.767031 | -2.213878 |
| 1  | 0.426646  | -0.705496 | -3.010525 |



**TS2v**

E = -3999.460837    ZPVE = 0.199620    NIMAG = 1.

|    |           |           |           |
|----|-----------|-----------|-----------|
| 17 | 1.104715  | 0.05617   | 2.314661  |
| 15 | 0.591542  | 1.742244  | -0.3017   |
| 12 | -1.371947 | 0.242448  | -0.307716 |
| 35 | -3.695744 | -0.168742 | -0.226652 |
| 6  | 0.5183    | 3.422623  | 0.491437  |
| 1  | 0.013449  | 3.343072  | 1.457492  |
| 1  | 1.531075  | 3.802844  | 0.661786  |
| 1  | -0.025172 | 4.140029  | -0.133249 |
| 6  | 1.535862  | 2.024565  | -1.868283 |
| 1  | 1.035195  | 2.744105  | -2.52292  |
| 1  | 2.540335  | 2.39497   | -1.633478 |
| 1  | 1.642568  | 1.07691   | -2.402903 |
| 6  | 1.777115  | -0.1002   | 0.524694  |
| 6  | 1.209149  | -1.177704 | -0.217992 |
| 6  | 3.194078  | 0.031239  | 0.414879  |
| 6  | 1.94038   | -1.940632 | -1.1188   |
| 6  | 3.923531  | -0.747208 | -0.473452 |
| 1  | 3.692826  | 0.772704  | 1.030167  |
| 6  | 3.314595  | -1.735791 | -1.264553 |
| 1  | 1.423337  | -2.700981 | -1.698759 |
| 1  | 4.997018  | -0.589907 | -0.538691 |
| 1  | 3.89292   | -2.337733 | -1.956017 |
| 8  | -0.193751 | -1.402828 | -0.094689 |
| 6  | -0.578454 | -2.593769 | 0.650616  |
| 1  | -0.182254 | -2.526138 | 1.665898  |
| 1  | -1.66945  | -2.611623 | 0.658149  |
| 1  | -0.188056 | -3.476311 | 0.140442  |

**PCv**

E = -3999.607747    ZPVE = 0.203651    NIMAG = 0.

|    |           |           |           |
|----|-----------|-----------|-----------|
| 17 | -1.021154 | 0.355426  | 2.916218  |
| 15 | 0.582842  | 1.568104  | -0.336424 |
| 12 | -1.313343 | 0.109646  | 0.686474  |
| 35 | -3.127135 | -0.287735 | -0.840462 |
| 6  | 1.285721  | 2.996038  | 0.595071  |
| 1  | 1.364331  | 2.721022  | 1.649921  |
| 1  | 2.262044  | 3.314272  | 0.218971  |
| 1  | 0.587866  | 3.834726  | 0.512298  |
| 6  | 0.627256  | 2.114774  | -2.10254  |
| 1  | -0.08838  | 2.930267  | -2.243955 |
| 1  | 1.625891  | 2.451506  | -2.396837 |
| 1  | 0.323308  | 1.281986  | -2.741612 |
| 6  | 1.891683  | 0.267063  | -0.259503 |
| 6  | 1.503455  | -1.08018  | -0.107883 |
| 6  | 3.262141  | 0.550347  | -0.332043 |
| 6  | 2.453719  | -2.100759 | -0.032094 |
| 6  | 4.222744  | -0.459991 | -0.262205 |
| 1  | 3.588441  | 1.579903  | -0.445985 |
| 6  | 3.811697  | -1.783698 | -0.108627 |
| 1  | 2.152256  | -3.131962 | 0.102302  |
| 1  | 5.278062  | -0.214135 | -0.321413 |
| 1  | 4.545396  | -2.58132  | -0.044478 |
| 8  | 0.141138  | -1.341238 | -0.031012 |
| 6  | -0.322532 | -2.703949 | -0.178235 |
| 1  | -0.079861 | -3.284917 | 0.715582  |

|   |          |           |           |
|---|----------|-----------|-----------|
| 1 | -1.40221 | -2.628278 | -0.309522 |
| 1 | 0.125266 | -3.14986  | -1.069683 |

### S.11.4 Alternative solvent-phase reactions in manuscript

**R1<sub>1</sub> + a S<sub>N</sub>2@P-b** pathways 2, 3 and 4 in THF

**RC<sub>Ia-i</sub> 2**

E = -4303.614906      ZPVE = 0.461914      NIMAG = 0.

|    |           |           |           |
|----|-----------|-----------|-----------|
| 17 | -3.389002 | 1.236146  | -2.122316 |
| 15 | -1.814777 | 0.461789  | -0.964668 |
| 5  | -0.699065 | -0.601097 | -2.160912 |
| 1  | 0.220407  | -0.997996 | -1.48183  |
| 1  | -0.357432 | 0.194077  | -3.007273 |
| 1  | -1.403162 | -1.487189 | -2.58114  |
| 6  | 6.306065  | -1.445992 | -2.021472 |
| 1  | 5.662706  | -1.987885 | -2.732388 |
| 1  | 6.72839   | -0.608617 | -2.598357 |
| 6  | 7.446255  | -2.373222 | -1.554537 |
| 1  | 7.06701   | -3.243162 | -1.002951 |
| 1  | 8.045992  | -2.767174 | -2.390515 |
| 1  | 8.144535  | -1.855854 | -0.883957 |
| 12 | 5.023082  | -0.627716 | -0.539773 |
| 35 | 3.286041  | 0.320406  | 0.922621  |
| 6  | -4.104149 | -0.805826 | 0.278391  |
| 6  | -1.844129 | -1.348212 | 1.313717  |
| 6  | -4.129916 | -2.125765 | -0.506827 |
| 1  | -4.715998 | -0.049383 | -0.21968  |
| 1  | -4.565496 | -0.973969 | 1.262448  |
| 6  | -1.861131 | -2.686242 | 0.542772  |

|   |           |           |           |
|---|-----------|-----------|-----------|
| 6 | -0.430764 | -0.894067 | 1.777967  |
| 1 | -2.424612 | -1.512143 | 2.237306  |
| 6 | -3.28422  | -3.174852 | 0.229981  |
| 6 | -5.568907 | -2.605935 | -0.732207 |
| 1 | -3.674407 | -1.951886 | -1.492512 |
| 1 | -1.358847 | -3.451514 | 1.140694  |
| 1 | -1.288145 | -2.589443 | -0.385894 |
| 6 | -0.497165 | 0.284769  | 2.76564   |
| 6 | 0.361196  | -2.038788 | 2.437888  |
| 1 | 0.148193  | -0.572575 | 0.902734  |
| 1 | -3.234589 | -4.09785  | -0.361554 |
| 1 | -3.791888 | -3.434457 | 1.171759  |
| 1 | -6.154266 | -1.864633 | -1.28809  |
| 1 | -5.586172 | -3.542747 | -1.300499 |
| 1 | -6.075962 | -2.785729 | 0.224366  |
| 1 | -1.028605 | -0.009322 | 3.680187  |
| 1 | 0.514409  | 0.592249  | 3.049768  |
| 1 | -0.998338 | 1.16423   | 2.353791  |
| 1 | -0.20297  | -2.48017  | 3.270155  |
| 1 | 1.304248  | -1.652577 | 2.836868  |
| 1 | 0.60854   | -2.838918 | 1.735007  |
| 6 | -1.010214 | 2.002266  | -0.395308 |
| 6 | 0.360375  | 2.179336  | -0.632654 |
| 6 | -1.736704 | 3.010465  | 0.263287  |
| 6 | 0.997316  | 3.351352  | -0.213161 |
| 1 | 0.931887  | 1.408963  | -1.136256 |
| 6 | -1.097526 | 4.177653  | 0.677114  |
| 1 | -2.801723 | 2.895642  | 0.442397  |
| 6 | 0.270615  | 4.351478  | 0.434054  |
| 1 | 2.061331  | 3.473372  | -0.387914 |

|   |           |           |          |
|---|-----------|-----------|----------|
| 1 | -1.666407 | 4.954271  | 1.179133 |
| 1 | 0.766969  | 5.261295  | 0.758523 |
| 6 | -2.683956 | -0.261167 | 0.557696 |
| 1 | -2.792228 | 0.610101  | 1.211132 |

**TS<sub>1a-i</sub> 2**

E = -4303.545178      ZPVE = 0.466034      NIMAG = 1.

|    |           |           |           |
|----|-----------|-----------|-----------|
| 17 | -1.527969 | 3.204067  | 0.63565   |
| 15 | -0.898661 | 1.108148  | -0.526388 |
| 5  | -1.533473 | 1.900179  | -2.273975 |
| 1  | -1.495295 | 1.056044  | -3.129714 |
| 1  | -0.758126 | 2.810771  | -2.442399 |
| 1  | -2.645768 | 2.275656  | -2.006577 |
| 6  | -0.079101 | -0.830811 | -1.964671 |
| 1  | -1.158285 | -0.89125  | -2.045299 |
| 1  | 0.225488  | -0.272802 | -2.860627 |
| 6  | 0.469822  | -2.290981 | -2.037156 |
| 1  | 0.149063  | -2.902856 | -1.192772 |
| 1  | 0.10005   | -2.772189 | -2.951425 |
| 1  | 1.566397  | -2.382736 | -2.091792 |
| 12 | 1.806739  | -0.395138 | -0.928301 |
| 35 | 3.991164  | -1.315583 | -0.448123 |
| 6  | -3.485315 | 0.551263  | 0.409911  |
| 6  | -1.938789 | -1.346229 | 1.080732  |
| 6  | -4.125796 | -0.314543 | -0.685492 |
| 1  | -3.564572 | 1.609554  | 0.157175  |
| 1  | -4.054841 | 0.415543  | 1.340949  |
| 6  | -2.607581 | -2.241603 | 0.01675   |

|   |           |           |           |
|---|-----------|-----------|-----------|
| 6 | -0.556407 | -1.822035 | 1.61366   |
| 1 | -2.613871 | -1.406612 | 1.951098  |
| 6 | -4.04369  | -1.795911 | -0.295215 |
| 6 | -5.570239 | 0.129083  | -0.949916 |
| 1 | -3.558367 | -0.170764 | -1.616535 |
| 1 | -2.634869 | -3.270202 | 0.388374  |
| 1 | -2.025649 | -2.26727  | -0.907557 |
| 6 | -0.330611 | -1.338399 | 3.060644  |
| 6 | -0.356915 | -3.347922 | 1.594033  |
| 1 | 0.218132  | -1.379998 | 0.967543  |
| 1 | -4.457835 | -2.421737 | -1.095732 |
| 1 | -4.674765 | -1.96258  | 0.590996  |
| 1 | -5.611388 | 1.177646  | -1.264872 |
| 1 | -6.031084 | -0.478176 | -1.737153 |
| 1 | -6.182999 | 0.025672  | -0.045306 |
| 1 | -0.944413 | -1.934226 | 3.746391  |
| 1 | 0.715774  | -1.457658 | 3.35984   |
| 1 | -0.609849 | -0.293066 | 3.219312  |
| 1 | -1.117769 | -3.846324 | 2.206222  |
| 1 | 0.621952  | -3.59906  | 2.016183  |
| 1 | -0.404238 | -3.777841 | 0.591249  |
| 6 | 0.790008  | 1.553061  | 0.108293  |
| 6 | 1.68185   | 2.16804   | -0.802926 |
| 6 | 1.178878  | 1.437445  | 1.457274  |
| 6 | 2.927357  | 2.638847  | -0.369095 |
| 1 | 1.380167  | 2.324052  | -1.834893 |
| 6 | 2.42534   | 1.905759  | 1.87717   |
| 1 | 0.507494  | 1.005599  | 2.185222  |
| 6 | 3.300168  | 2.510795  | 0.970298  |
| 1 | 3.596092  | 3.108573  | -1.083037 |

|   |           |          |          |
|---|-----------|----------|----------|
| 1 | 2.709606  | 1.796657 | 2.918879 |
| 1 | 4.266889  | 2.873136 | 1.303906 |
| 6 | -2.014384 | 0.180398 | 0.747397 |
| 1 | -1.749564 | 0.725716 | 1.655773 |

**PC<sub>Ia-i</sub> 2**

E = -4303.688597    ZPVE = 0.465396    NIMAG = 0.

|    |           |           |           |
|----|-----------|-----------|-----------|
| 17 | -7.72641  | -1.62521  | -1.435764 |
| 15 | 2.562305  | 1.017384  | -0.87343  |
| 5  | 3.107716  | 1.366525  | -2.724418 |
| 1  | 4.21307   | 0.88851   | -2.874989 |
| 1  | 3.109224  | 2.579606  | -2.797668 |
| 1  | 2.270986  | 0.861744  | -3.44459  |
| 6  | 3.842165  | 1.824625  | 0.210234  |
| 1  | 4.76661   | 1.282639  | -0.017524 |
| 1  | 3.963547  | 2.804989  | -0.265589 |
| 6  | 3.689844  | 2.001251  | 1.727969  |
| 1  | 3.741096  | 1.055467  | 2.267542  |
| 1  | 4.510465  | 2.630102  | 2.089868  |
| 1  | 2.753984  | 2.489504  | 2.006951  |
| 12 | -5.999124 | -0.777659 | -0.198824 |
| 35 | -3.965836 | -0.066883 | 0.922767  |
| 6  | 3.063118  | -1.702019 | -1.55107  |
| 6  | 2.331309  | -1.438429 | 0.870546  |
| 6  | 4.52778   | -1.913785 | -1.138804 |
| 1  | 3.010298  | -1.283747 | -2.559433 |
| 1  | 2.570812  | -2.68514  | -1.592082 |
| 6  | 3.802029  | -1.642185 | 1.296574  |

|   |           |           |           |
|---|-----------|-----------|-----------|
| 6 | 1.399828  | -0.753036 | 1.913251  |
| 1 | 1.926051  | -2.456975 | 0.744314  |
| 6 | 4.586719  | -2.490256 | 0.283378  |
| 6 | 5.264521  | -2.802921 | -2.148202 |
| 1 | 5.028574  | -0.933846 | -1.131689 |
| 1 | 3.835773  | -2.137975 | 2.27114   |
| 1 | 4.309132  | -0.679799 | 1.423512  |
| 6 | -0.078329 | -1.075044 | 1.626215  |
| 6 | 1.71616   | -1.144334 | 3.367628  |
| 1 | 1.522438  | 0.333906  | 1.835475  |
| 1 | 5.630832  | -2.582925 | 0.608963  |
| 1 | 4.17229   | -3.509818 | 0.26835   |
| 1 | 5.246565  | -2.363238 | -3.151751 |
| 1 | 6.312735  | -2.942965 | -1.860147 |
| 1 | 4.798741  | -3.794878 | -2.207749 |
| 1 | -0.277622 | -2.140338 | 1.799109  |
| 1 | -0.734283 | -0.499626 | 2.287676  |
| 1 | -0.37472  | -0.84104  | 0.601297  |
| 1 | 1.682348  | -2.233156 | 3.501016  |
| 1 | 0.970265  | -0.707476 | 4.040622  |
| 1 | 2.700378  | -0.796297 | 3.694781  |
| 6 | 0.960942  | 1.887791  | -0.596808 |
| 6 | 0.891141  | 3.131568  | 0.051797  |
| 6 | -0.210769 | 1.374661  | -1.181263 |
| 6 | -0.322018 | 3.819721  | 0.150635  |
| 1 | 1.778618  | 3.586416  | 0.474903  |
| 6 | -1.422176 | 2.059547  | -1.078824 |
| 1 | -0.189127 | 0.43914   | -1.731479 |
| 6 | -1.484652 | 3.281772  | -0.404286 |
| 1 | -0.352723 | 4.776112  | 0.664374  |



|   |           |           |           |
|---|-----------|-----------|-----------|
| 1 | -2.314581 | 1.638446  | -1.529849 |
| 1 | -2.428041 | 3.81223   | -0.318744 |
| 6 | 2.244797  | -0.831856 | -0.563641 |
| 1 | 1.201359  | -0.903997 | -0.88799  |

**P<sub>1a-i</sub> 2**

E = -1071.474465    ZPVE = 0.462528    NIMAG = 0.

|   |           |           |           |
|---|-----------|-----------|-----------|
| 6 | -0.873611 | -0.135403 | -0.834069 |
| 6 | -2.491184 | 1.252557  | 0.581977  |
| 6 | -2.086447 | -0.993359 | -1.277738 |
| 6 | -3.664005 | 0.372673  | 0.121441  |
| 6 | -0.20477  | 2.314363  | -0.185375 |
| 6 | -4.397454 | -1.894573 | -0.766781 |
| 6 | 0.528992  | 2.681464  | -1.489244 |
| 6 | -0.680444 | 3.610451  | 0.494755  |
| 1 | -0.226296 | -0.049424 | -1.713229 |
| 1 | -2.863534 | 2.264702  | 0.764733  |
| 1 | -2.122442 | 0.882762  | 1.544586  |
| 1 | 1.303955  | 0.827361  | 2.661704  |
| 1 | -1.761364 | -2.00308  | -1.540936 |
| 1 | -2.477812 | -0.538536 | -2.199866 |
| 1 | -4.430693 | 0.338695  | 0.906116  |
| 1 | -4.13729  | 0.835127  | -0.758103 |
| 1 | 0.525465  | 1.844645  | 0.484718  |
| 1 | -4.080541 | -2.918807 | -0.993007 |
| 1 | -5.204094 | -1.946942 | -0.026571 |
| 1 | -4.813955 | -1.461154 | -1.685008 |
| 1 | -0.144127 | 3.221877  | -2.16676  |

|    |           |           |           |
|----|-----------|-----------|-----------|
| 1  | 1.385581  | 3.331649  | -1.280818 |
| 1  | 0.908773  | 1.806115  | -2.022076 |
| 1  | -1.456521 | 4.108606  | -0.099961 |
| 1  | 0.157926  | 4.308615  | 0.593875  |
| 1  | -1.084311 | 3.438306  | 1.496705  |
| 6  | 1.996292  | -0.649339 | -0.046268 |
| 6  | 2.419102  | -0.51058  | -1.379936 |
| 6  | 2.966828  | -0.586886 | 0.968339  |
| 6  | 3.760783  | -0.27345  | -1.686529 |
| 1  | 1.710937  | -0.602481 | -2.197086 |
| 6  | 4.309943  | -0.350822 | 0.661636  |
| 1  | 2.692645  | -0.734036 | 2.006261  |
| 6  | 4.711173  | -0.184875 | -0.665812 |
| 1  | 4.061263  | -0.166111 | -2.724586 |
| 1  | 5.040289  | -0.301708 | 1.463902  |
| 1  | 5.754461  | -0.000312 | -0.903676 |
| 6  | -1.355246 | 1.301499  | -0.463808 |
| 1  | -1.836907 | 1.657208  | -1.390446 |
| 6  | -0.014204 | -0.859193 | 2.148755  |
| 1  | 0.581861  | -1.663153 | 2.596296  |
| 15 | 0.255361  | -1.129973 | 0.32733   |
| 5  | 0.109001  | -3.061684 | 0.022009  |
| 1  | 0.995466  | -3.522778 | 0.71379   |
| 1  | -0.995832 | -3.4069   | 0.386308  |
| 1  | 0.299983  | -3.251241 | -1.161652 |
| 6  | 0.290862  | 0.46868   | 2.856263  |
| 1  | -0.40072  | 1.262372  | 2.572989  |
| 1  | 0.195001  | 0.320253  | 3.937229  |
| 1  | -1.056234 | -1.151589 | 2.317598  |
| 6  | -3.225494 | -1.051946 | -0.248282 |

|   |          |           |          |
|---|----------|-----------|----------|
| 1 | -2.84305 | -1.539601 | 0.661032 |
|---|----------|-----------|----------|

### RC<sub>1a-i</sub> 3

E = -4303.613699    ZPVE = 0.463604    NIMAG = 0.

|   |           |           |           |
|---|-----------|-----------|-----------|
| 6 | -1.242806 | -1.683187 | -0.109594 |
| 6 | 0.2673    | -1.778584 | 1.961084  |
| 6 | 1.16096   | -2.62067  | -0.29375  |
| 6 | -0.293805 | -2.705409 | -0.777665 |
| 6 | 1.205728  | -2.756945 | 1.235391  |
| 6 | -2.200764 | -0.973837 | 2.239476  |
| 6 | 2.033697  | -3.676199 | -0.983059 |
| 6 | -3.655587 | -1.351263 | 1.904645  |
| 6 | -2.001477 | -1.071506 | 3.763322  |
| 1 | -2.258708 | -1.908564 | -0.449165 |
| 1 | 0.280946  | -2.016903 | 3.0281    |
| 1 | 0.648769  | -0.756382 | 1.867969  |
| 1 | 1.566038  | -1.635699 | -0.561395 |
| 1 | -0.343092 | -2.623866 | -1.866597 |
| 1 | -0.695224 | -3.69775  | -0.526166 |
| 1 | 2.232738  | -2.612965 | 1.592765  |
| 1 | 0.923122  | -3.786645 | 1.503035  |
| 1 | -2.047499 | 0.079468  | 1.967074  |
| 1 | 2.022122  | -3.55197  | -2.071959 |
| 1 | 3.073647  | -3.600145 | -0.647952 |
| 1 | 1.678026  | -4.68948  | -0.756236 |
| 1 | -3.858763 | -2.387586 | 2.202773  |
| 1 | -4.353338 | -0.705804 | 2.448418  |
| 1 | -3.889875 | -1.255881 | 0.841534  |

|    |           |           |           |
|----|-----------|-----------|-----------|
| 1  | -2.044504 | -2.114945 | 4.100802  |
| 1  | -2.797915 | -0.524003 | 4.278506  |
| 1  | -1.048007 | -0.648325 | 4.089854  |
| 6  | -2.648887 | 0.858745  | -0.830343 |
| 6  | -2.886668 | 2.087517  | -0.194666 |
| 6  | -3.676523 | 0.250632  | -1.572513 |
| 6  | -4.144855 | 2.689264  | -0.285427 |
| 1  | -2.099916 | 2.57285   | 0.371854  |
| 6  | -4.926435 | 0.860877  | -1.667231 |
| 1  | -3.505396 | -0.688605 | -2.089654 |
| 6  | -5.163608 | 2.079204  | -1.020384 |
| 1  | -4.322276 | 3.636748  | 0.213741  |
| 1  | -5.71339  | 0.386923  | -2.245548 |
| 1  | -6.138543 | 2.551363  | -1.093895 |
| 17 | -0.448955 | -0.098916 | -2.707909 |
| 6  | -1.187492 | -1.851374 | 1.448551  |
| 1  | -1.516078 | -2.893436 | 1.595803  |
| 6  | 2.970211  | 3.94233   | 0.903395  |
| 1  | 2.421771  | 4.56415   | 0.177399  |
| 15 | -0.995483 | 0.095527  | -0.700661 |
| 12 | 2.985066  | 1.951073  | 0.153309  |
| 35 | 4.255924  | -0.044389 | -0.624754 |
| 5  | 0.290614  | 1.294096  | 0.132499  |
| 1  | 0.3379    | 2.257437  | -0.592293 |
| 1  | -0.108234 | 1.535162  | 1.243096  |
| 1  | 1.323797  | 0.654231  | 0.149204  |
| 6  | 2.376631  | 4.166389  | 2.309763  |
| 1  | 2.928326  | 3.608562  | 3.078276  |
| 1  | 2.385426  | 5.223245  | 2.622836  |
| 1  | 1.333116  | 3.830415  | 2.368672  |

|   |          |          |          |
|---|----------|----------|----------|
| 1 | 4.004557 | 4.321426 | 0.881745 |
|---|----------|----------|----------|

**TS<sub>1a-i</sub> 3**

E = -4303.563373    ZPVE = 0.466512    NIMAG = 1.

|   |           |           |           |
|---|-----------|-----------|-----------|
| 6 | -2.200431 | 0.182319  | -0.448233 |
| 6 | -2.486391 | -1.620889 | 1.333122  |
| 6 | -2.736983 | -2.297523 | -1.109267 |
| 6 | -2.858567 | -0.803992 | -1.461755 |
| 6 | -3.1765   | -2.564322 | 0.336921  |
| 6 | -2.562594 | 0.927715  | 2.077994  |
| 6 | -3.52301  | -3.1493   | -2.115086 |
| 6 | -3.395491 | 2.186901  | 1.764602  |
| 6 | -2.939342 | 0.421403  | 3.481722  |
| 1 | -2.518505 | 1.190419  | -0.725259 |
| 1 | -2.849673 | -1.840085 | 2.339971  |
| 1 | -1.410684 | -1.815193 | 1.333138  |
| 1 | -1.681173 | -2.584128 | -1.190904 |
| 1 | -2.4867   | -0.627725 | -2.472125 |
| 1 | -3.923748 | -0.5329   | -1.481036 |
| 1 | -2.968172 | -3.608979 | 0.601064  |
| 1 | -4.266207 | -2.432892 | 0.415352  |
| 1 | -1.510644 | 1.225362  | 2.127081  |
| 1 | -3.16629  | -2.987946 | -3.138543 |
| 1 | -3.423074 | -4.216774 | -1.888237 |
| 1 | -4.591485 | -2.900727 | -2.088862 |
| 1 | -4.466593 | 1.956871  | 1.819603  |
| 1 | -3.187335 | 2.97918   | 2.491517  |
| 1 | -3.201714 | 2.596557  | 0.768118  |

|    |           |           |           |
|----|-----------|-----------|-----------|
| 1  | -3.963536 | 0.028665  | 3.501718  |
| 1  | -2.888135 | 1.246894  | 4.199683  |
| 1  | -2.266828 | -0.364657 | 3.836142  |
| 6  | 0.558751  | 1.869182  | -0.486192 |
| 6  | 1.820743  | 2.092025  | -1.063524 |
| 6  | 0.00817   | 2.848821  | 0.348039  |
| 6  | 2.524973  | 3.262961  | -0.785275 |
| 1  | 2.258803  | 1.36312   | -1.736142 |
| 6  | 0.715417  | 4.024729  | 0.618246  |
| 1  | -0.972475 | 2.720426  | 0.784593  |
| 6  | 1.977232  | 4.233415  | 0.060104  |
| 1  | 3.50041   | 3.416981  | -1.236562 |
| 1  | 0.272075  | 4.77411   | 1.267064  |
| 1  | 2.526903  | 5.14473   | 0.274435  |
| 17 | -0.960165 | 1.403064  | -2.954307 |
| 6  | -2.765341 | -0.148805 | 0.96899   |
| 1  | -3.85087  | -0.111364 | 0.777379  |
| 6  | 0.812646  | -0.319377 | 1.39658   |
| 1  | -0.075081 | 0.214947  | 1.711364  |
| 15 | -0.328698 | 0.31145   | -0.903985 |
| 12 | 1.995668  | -1.486028 | -0.059541 |
| 35 | 4.382418  | -1.67088  | 0.408072  |
| 5  | 0.573347  | -1.16437  | -1.887191 |
| 1  | 1.727699  | -0.792232 | -2.004671 |
| 1  | 0.474922  | -2.158285 | -1.181694 |
| 1  | 0.08889   | -1.362965 | -2.957928 |
| 6  | 1.044648  | -1.479081 | 2.407569  |
| 1  | 1.997236  | -2.010137 | 2.262919  |
| 1  | 1.095004  | -1.08625  | 3.432177  |
| 1  | 0.248795  | -2.228649 | 2.387747  |

|   |          |          |          |
|---|----------|----------|----------|
| 1 | 1.624488 | 0.417678 | 1.474469 |
|---|----------|----------|----------|

**PC<sub>1a-i</sub> 3**

E = -4303.704701    ZPVE = 0.467699    NIMAG = 0.

|   |           |           |           |
|---|-----------|-----------|-----------|
| 6 | -1.750046 | -0.672797 | -0.874492 |
| 6 | -3.411063 | -2.252545 | 0.253332  |
| 6 | -1.246102 | -3.211638 | -0.738105 |
| 6 | -1.097176 | -1.909931 | -1.538421 |
| 6 | -2.726847 | -3.458716 | -0.411706 |
| 6 | -4.073777 | 0.259203  | -0.06445  |
| 6 | -0.619791 | -4.394905 | -1.486836 |
| 6 | -4.137306 | 1.3775    | -1.121531 |
| 6 | -5.509285 | -0.122077 | 0.34262   |
| 1 | -1.699782 | 0.137626  | -1.610824 |
| 1 | -4.473099 | -2.482469 | 0.373411  |
| 1 | -3.015374 | -2.110152 | 1.266215  |
| 1 | -0.69981  | -3.095117 | 0.208375  |
| 1 | -0.04241  | -1.718676 | -1.75652  |
| 1 | -1.594181 | -2.039486 | -2.510656 |
| 1 | -2.825464 | -4.341145 | 0.233018  |
| 1 | -3.257354 | -3.695413 | -1.346309 |
| 1 | -3.585407 | 0.66893   | 0.829405  |
| 1 | 0.44764   | -4.227876 | -1.669637 |
| 1 | -0.720943 | -5.322226 | -0.911801 |
| 1 | -1.108677 | -4.547506 | -2.457211 |
| 1 | -4.646094 | 1.019922  | -2.025566 |
| 1 | -4.702712 | 2.233536  | -0.738526 |
| 1 | -3.151079 | 1.746802  | -1.413109 |

|    |           |           |           |
|----|-----------|-----------|-----------|
| 1  | -6.032815 | -0.623717 | -0.481143 |
| 1  | -6.07762  | 0.779549  | 0.594749  |
| 1  | -5.538849 | -0.782232 | 1.213709  |
| 6  | -0.865968 | 1.895215  | 0.339255  |
| 6  | -1.526809 | 2.667399  | 1.307588  |
| 6  | -0.328081 | 2.535999  | -0.790202 |
| 6  | -1.655116 | 4.049325  | 1.143156  |
| 1  | -1.954158 | 2.20847   | 2.192101  |
| 6  | -0.460549 | 3.915957  | -0.953523 |
| 1  | 0.207977  | 1.966767  | -1.542956 |
| 6  | -1.124373 | 4.676358  | 0.01321   |
| 1  | -2.170272 | 4.632118  | 1.900771  |
| 1  | -0.03351  | 4.394789  | -1.829084 |
| 1  | -1.222731 | 5.750474  | -0.111049 |
| 17 | 3.636637  | 2.57568   | -1.191927 |
| 6  | -3.25497  | -0.960458 | -0.576592 |
| 1  | -3.671365 | -1.193757 | -1.571015 |
| 6  | -1.113653 | -0.328854 | 2.239514  |
| 1  | -2.197139 | -0.24851  | 2.358793  |
| 15 | -0.655468 | 0.074294  | 0.486176  |
| 12 | 3.440444  | 0.48534   | -0.235007 |
| 35 | 4.993675  | -1.295504 | 0.402186  |
| 5  | 1.210897  | -0.40226  | 0.208556  |
| 1  | 1.820713  | 0.230943  | 1.061396  |
| 1  | 1.369181  | -1.581257 | 0.359232  |
| 1  | 1.513603  | -0.058775 | -0.924224 |
| 6  | -0.595452 | -1.661088 | 2.798715  |
| 1  | 0.491901  | -1.730646 | 2.722229  |
| 1  | -0.865447 | -1.726146 | 3.857242  |
| 1  | -1.028119 | -2.527543 | 2.29379   |



|   |           |         |          |
|---|-----------|---------|----------|
| 1 | -0.667642 | 0.48795 | 2.816923 |
|---|-----------|---------|----------|

**RC<sub>1a-i</sub> 4**

E = -4303.614906    ZPVE = 0.461914    NIMAG = 0.

|    |           |           |           |
|----|-----------|-----------|-----------|
| 17 | -3.389002 | 1.236146  | -2.122316 |
| 15 | -1.814777 | 0.461789  | -0.964668 |
| 5  | -0.699065 | -0.601097 | -2.160912 |
| 1  | 0.220407  | -0.997996 | -1.48183  |
| 1  | -0.357432 | 0.194077  | -3.007273 |
| 1  | -1.403162 | -1.487189 | -2.58114  |
| 6  | 6.306065  | -1.445992 | -2.021472 |
| 1  | 5.662706  | -1.987885 | -2.732388 |
| 1  | 6.72839   | -0.608617 | -2.598357 |
| 6  | 7.446255  | -2.373222 | -1.554537 |
| 1  | 7.06701   | -3.243162 | -1.002951 |
| 1  | 8.045992  | -2.767174 | -2.390515 |
| 1  | 8.144535  | -1.855854 | -0.883957 |
| 12 | 5.023082  | -0.627716 | -0.539773 |
| 35 | 3.286041  | 0.320406  | 0.922621  |
| 6  | -4.104149 | -0.805826 | 0.278391  |
| 6  | -1.844129 | -1.348212 | 1.313717  |
| 6  | -4.129916 | -2.125765 | -0.506827 |
| 1  | -4.715998 | -0.049383 | -0.21968  |
| 1  | -4.565496 | -0.973969 | 1.262448  |
| 6  | -1.861131 | -2.686242 | 0.542772  |
| 6  | -0.430764 | -0.894067 | 1.777967  |
| 1  | -2.424612 | -1.512143 | 2.237306  |
| 6  | -3.28422  | -3.174852 | 0.229981  |

|   |           |           |           |
|---|-----------|-----------|-----------|
| 6 | -5.568907 | -2.605935 | -0.732207 |
| 1 | -3.674407 | -1.951886 | -1.492512 |
| 1 | -1.358847 | -3.451514 | 1.140694  |
| 1 | -1.288145 | -2.589443 | -0.385894 |
| 6 | -0.497165 | 0.284769  | 2.76564   |
| 6 | 0.361196  | -2.038788 | 2.437888  |
| 1 | 0.148193  | -0.572575 | 0.902734  |
| 1 | -3.234589 | -4.09785  | -0.361554 |
| 1 | -3.791888 | -3.434457 | 1.171759  |
| 1 | -6.154266 | -1.864633 | -1.28809  |
| 1 | -5.586172 | -3.542747 | -1.300499 |
| 1 | -6.075962 | -2.785729 | 0.224366  |
| 1 | -1.028605 | -0.009322 | 3.680187  |
| 1 | 0.514409  | 0.592249  | 3.049768  |
| 1 | -0.998338 | 1.16423   | 2.353791  |
| 1 | -0.20297  | -2.48017  | 3.270155  |
| 1 | 1.304248  | -1.652577 | 2.836868  |
| 1 | 0.60854   | -2.838918 | 1.735007  |
| 6 | -1.010214 | 2.002266  | -0.395308 |
| 6 | 0.360375  | 2.179336  | -0.632654 |
| 6 | -1.736704 | 3.010465  | 0.263287  |
| 6 | 0.997316  | 3.351352  | -0.213161 |
| 1 | 0.931887  | 1.408963  | -1.136256 |
| 6 | -1.097526 | 4.177653  | 0.677114  |
| 1 | -2.801723 | 2.895642  | 0.442397  |
| 6 | 0.270615  | 4.351478  | 0.434054  |
| 1 | 2.061331  | 3.473372  | -0.387914 |
| 1 | -1.666407 | 4.954271  | 1.179133  |
| 1 | 0.766969  | 5.261295  | 0.758523  |
| 6 | -2.683956 | -0.261167 | 0.557696  |

|   |           |          |          |
|---|-----------|----------|----------|
| 1 | -2.792228 | 0.610101 | 1.211132 |
|---|-----------|----------|----------|

**TS<sub>1a-i</sub> 4**

E = -4303.537655    ZPVE = 0.465416    NIMAG = 1.

|    |           |           |           |
|----|-----------|-----------|-----------|
| 17 | 1.476145  | 3.107226  | -0.954254 |
| 15 | 0.890165  | 1.124024  | 0.493321  |
| 5  | 1.926721  | 1.864525  | 2.049776  |
| 1  | 2.185548  | 0.90637   | 2.73659   |
| 1  | 1.154585  | 2.639737  | 2.565111  |
| 1  | 2.886385  | 2.390577  | 1.554351  |
| 6  | -0.35763  | -0.207476 | 2.335758  |
| 1  | -0.019968 | 0.686939  | 2.853386  |
| 1  | -1.448603 | -0.18158  | 2.591787  |
| 6  | 0.23687   | -1.451941 | 2.995231  |
| 1  | 0.056949  | -2.375285 | 2.435096  |
| 1  | 1.316304  | -1.342888 | 3.121688  |
| 1  | -0.187281 | -1.594739 | 3.998606  |
| 12 | -1.78735  | -0.398087 | 0.618138  |
| 35 | -3.798748 | -1.531965 | -0.077988 |
| 6  | 3.185426  | 0.376925  | -1.034557 |
| 6  | 1.712868  | -1.623238 | -0.683216 |
| 6  | 4.193999  | -0.11276  | 0.017805  |
| 1  | 3.253998  | 1.457708  | -1.141851 |
| 1  | 3.463912  | -0.048743 | -2.009962 |
| 6  | 2.646896  | -2.078628 | 0.456615  |
| 6  | 0.350509  | -2.357021 | -0.789683 |
| 1  | 2.230593  | -1.914882 | -1.611842 |
| 6  | 4.092076  | -1.630495 | 0.204807  |

|   |           |           |           |
|---|-----------|-----------|-----------|
| 6 | 5.61495   | 0.321549  | -0.365856 |
| 1 | 3.946565  | 0.361686  | 0.975033  |
| 1 | 2.626658  | -3.167461 | 0.543081  |
| 1 | 2.303178  | -1.680652 | 1.414342  |
| 6 | -0.276998 | -2.17855  | -2.186218 |
| 6 | 0.435452  | -3.864296 | -0.486361 |
| 1 | -0.324231 | -1.948814 | -0.017035 |
| 1 | 4.732682  | -1.950378 | 1.036377  |
| 1 | 4.472715  | -2.134397 | -0.696885 |
| 1 | 5.689418  | 1.411453  | -0.450046 |
| 1 | 6.341567  | -0.008344 | 0.385388  |
| 1 | 5.911202  | -0.111185 | -1.330159 |
| 1 | 0.344273  | -2.686221 | -2.932727 |
| 1 | -1.277448 | -2.6191   | -2.222515 |
| 1 | -0.36657  | -1.134201 | -2.496862 |
| 1 | 1.176292  | -4.346806 | -1.134982 |
| 1 | -0.534121 | -4.334207 | -0.678824 |
| 1 | 0.704086  | -4.073123 | 0.551674  |
| 6 | -0.815133 | 1.723723  | 0.03626   |
| 6 | -1.496292 | 2.529062  | 0.978118  |
| 6 | -1.407365 | 1.519481  | -1.227731 |
| 6 | -2.718302 | 3.116363  | 0.650829  |
| 1 | -1.052965 | 2.720659  | 1.94881   |
| 6 | -2.639487 | 2.10637   | -1.541938 |
| 1 | -0.890177 | 0.9528    | -1.993077 |
| 6 | -3.292102 | 2.911577  | -0.609312 |
| 1 | -3.2171   | 3.744571  | 1.382025  |
| 1 | -3.07275  | 1.936305  | -2.52197  |
| 1 | -4.24101  | 3.375166  | -0.857995 |
| 6 | 1.700977  | -0.059712 | -0.815024 |

|   |          |          |           |
|---|----------|----------|-----------|
| 1 | 1.158871 | 0.213433 | -1.724215 |
|---|----------|----------|-----------|

**PC<sub>1a-i</sub> 4**

E = -4303.689660    ZPVE = 0.466261    NIMAG = 0.

|    |           |           |           |
|----|-----------|-----------|-----------|
| 17 | -3.257433 | -1.845772 | -2.617276 |
| 15 | 1.17622   | 0.596148  | 0.852893  |
| 5  | 1.906593  | 1.621009  | 2.353051  |
| 1  | 2.690611  | 0.901812  | 2.930366  |
| 1  | 0.922466  | 1.863057  | 3.02534   |
| 1  | 2.42345   | 2.625386  | 1.918949  |
| 6  | 0.032305  | -0.72333  | 1.512717  |
| 1  | -0.913395 | -0.194899 | 1.672593  |
| 1  | -0.149409 | -1.472341 | 0.737175  |
| 6  | 0.460812  | -1.376768 | 2.834869  |
| 1  | 1.427974  | -1.881151 | 2.765842  |
| 1  | 0.530997  | -0.63191  | 3.630454  |
| 1  | -0.284582 | -2.122864 | 3.129762  |
| 12 | -3.905019 | -0.827234 | -0.684802 |
| 35 | -5.046996 | -0.075474 | 1.314613  |
| 6  | 3.239982  | 1.057348  | -1.009597 |
| 6  | 3.164109  | -1.372629 | -0.298902 |
| 6  | 4.469279  | 1.324628  | -0.119911 |
| 1  | 2.67193   | 1.985943  | -1.143217 |
| 1  | 3.58594   | 0.767357  | -2.012673 |
| 6  | 4.308768  | -1.09868  | 0.697015  |
| 6  | 2.381024  | -2.695862 | -0.068511 |
| 1  | 3.649122  | -1.509256 | -1.281299 |
| 6  | 5.226283  | 0.021436  | 0.180088  |

|   |           |           |           |
|---|-----------|-----------|-----------|
| 6 | 5.384616  | 2.375721  | -0.761535 |
| 1 | 4.113915  | 1.727076  | 0.834753  |
| 1 | 4.90859   | -2.001171 | 0.841587  |
| 1 | 3.902558  | -0.828908 | 1.68053   |
| 6 | 1.384996  | -2.978964 | -1.209278 |
| 6 | 3.326414  | -3.905906 | 0.063954  |
| 1 | 1.819641  | -2.627046 | 0.868769  |
| 1 | 6.022943  | 0.220388  | 0.908359  |
| 1 | 5.723348  | -0.327598 | -0.738353 |
| 1 | 4.851777  | 3.318547  | -0.931664 |
| 1 | 6.246913  | 2.590008  | -0.119697 |
| 1 | 5.767055  | 2.02713   | -1.729662 |
| 1 | 1.911268  | -3.065358 | -2.168387 |
| 1 | 0.859874  | -3.923881 | -1.033736 |
| 1 | 0.62267   | -2.203516 | -1.324247 |
| 1 | 3.998359  | -3.977132 | -0.801061 |
| 1 | 2.745507  | -4.833471 | 0.109095  |
| 1 | 3.941281  | -3.863016 | 0.966619  |
| 6 | 0.017731  | 1.636541  | -0.142664 |
| 6 | -0.152234 | 2.992369  | 0.175141  |
| 6 | -0.732113 | 1.091716  | -1.201005 |
| 6 | -1.048277 | 3.786324  | -0.54919  |
| 1 | 0.416544  | 3.428753  | 0.988674  |
| 6 | -1.626727 | 1.884316  | -1.924719 |
| 1 | -0.624504 | 0.046944  | -1.478846 |
| 6 | -1.788462 | 3.235327  | -1.597432 |
| 1 | -1.166386 | 4.834236  | -0.289718 |
| 1 | -2.186147 | 1.446606  | -2.746418 |
| 1 | -2.480627 | 3.853445  | -2.161463 |
| 6 | 2.310332  | -0.084673 | -0.512018 |

|   |          |           |           |
|---|----------|-----------|-----------|
| 1 | 1.602487 | -0.287381 | -1.321352 |
|---|----------|-----------|-----------|

**R1<sub>II</sub> + a S<sub>N</sub>2@P-b pathways 2 and 3 in THF**

**RC<sub>IIa-i</sub> 2**

E = -3995.124328    ZPVE = 0.343432    NIMAG = 0.

|    |           |           |           |
|----|-----------|-----------|-----------|
| 17 | 3.603498  | 1.807158  | 0.318362  |
| 15 | 1.876848  | 0.641514  | 0.078076  |
| 6  | 2.096659  | -0.121675 | -1.650951 |
| 6  | 2.014694  | -0.592257 | 1.52237   |
| 5  | 0.313027  | 1.79842   | 0.190702  |
| 1  | 0.283854  | 2.440175  | -0.833324 |
| 1  | 0.446773  | 2.474244  | 1.181929  |
| 1  | -0.609352 | 1.013098  | 0.278205  |
| 6  | -4.675523 | 2.244236  | -0.455785 |
| 1  | -3.973177 | 2.926479  | -0.95897  |
| 1  | -5.499187 | 2.098572  | -1.172113 |
| 6  | -5.219446 | 2.918438  | 0.820688  |
| 1  | -5.97039  | 2.2942    | 1.32219   |
| 1  | -4.425357 | 3.107058  | 1.554475  |
| 1  | -5.700537 | 3.88898   | 0.619849  |
| 12 | -3.696095 | 0.380177  | -0.218917 |
| 35 | -2.810539 | -1.914099 | -0.076897 |
| 6  | 0.730964  | -0.721582 | -2.063159 |
| 1  | -0.052324 | 0.039519  | -2.086733 |
| 1  | 0.834861  | -1.131687 | -3.074333 |
| 1  | 0.401308  | -1.531813 | -1.410564 |
| 6  | 3.196916  | -1.194752 | -1.721    |
| 1  | 3.321269  | -1.493329 | -2.768351 |

|   |           |           |           |
|---|-----------|-----------|-----------|
| 1 | 4.161489  | -0.817783 | -1.368697 |
| 1 | 2.940147  | -2.093486 | -1.155396 |
| 6 | 2.445003  | 1.021504  | -2.632147 |
| 1 | 2.417536  | 0.613354  | -3.648729 |
| 1 | 1.727342  | 1.844055  | -2.579786 |
| 1 | 3.446856  | 1.420096  | -2.457255 |
| 6 | 1.633928  | 0.193007  | 2.798744  |
| 1 | 1.719404  | -0.485717 | 3.65495   |
| 1 | 2.302783  | 1.040582  | 2.975096  |
| 1 | 0.608046  | 0.56487   | 2.759758  |
| 6 | 0.989441  | -1.727416 | 1.307128  |
| 1 | -0.027228 | -1.358563 | 1.150143  |
| 1 | 1.25864   | -2.379707 | 0.472736  |
| 1 | 0.978932  | -2.346237 | 2.211948  |
| 6 | 3.425217  | -1.185093 | 1.705509  |
| 1 | 4.173739  | -0.411527 | 1.891692  |
| 1 | 3.402642  | -1.843648 | 2.581394  |
| 1 | 3.749493  | -1.783374 | 0.853102  |

**TS<sub>IIa-i</sub> 2**

E = -3995.031611      ZPVE = 0.347799      NIMAG = 1.

|    |          |           |           |
|----|----------|-----------|-----------|
| 17 | 3.508987 | 0.565623  | -1.028935 |
| 15 | 1.430699 | -0.14437  | 0.402245  |
| 6  | 0.91696  | 1.775021  | 0.432575  |
| 6  | 0.910805 | -1.308599 | -1.127727 |
| 5  | 2.763413 | -0.849108 | 1.789464  |
| 1  | 2.656893 | -0.028776 | 2.67476   |
| 1  | 3.849334 | -0.887886 | 1.288162  |



|    |           |           |           |
|----|-----------|-----------|-----------|
| 1  | 2.341318  | -1.930683 | 2.110812  |
| 6  | -0.200345 | -0.863936 | 2.100068  |
| 1  | 0.595766  | -0.439529 | 2.705084  |
| 1  | -1.070367 | -0.346749 | 2.569154  |
| 6  | -0.31829  | -2.371767 | 2.391984  |
| 1  | -1.251789 | -2.820383 | 2.034322  |
| 1  | 0.506001  | -2.933343 | 1.949299  |
| 1  | -0.28161  | -2.550778 | 3.473484  |
| 12 | -1.767956 | -0.389849 | 0.647921  |
| 35 | -3.753125 | 0.346581  | -0.490017 |
| 6  | -0.361448 | 2.078573  | 1.237803  |
| 1  | -0.357792 | 1.68526   | 2.253872  |
| 1  | -0.442674 | 3.168023  | 1.325208  |
| 1  | -1.290503 | 1.810277  | 0.712326  |
| 6  | 0.705133  | 2.34602   | -0.981998 |
| 1  | 0.533643  | 3.425011  | -0.887202 |
| 1  | 1.570029  | 2.190928  | -1.624735 |
| 1  | -0.182396 | 1.921658  | -1.461018 |
| 6  | 2.0661    | 2.515816  | 1.15593   |
| 1  | 1.828932  | 3.586397  | 1.149548  |
| 1  | 2.157862  | 2.197216  | 2.197253  |
| 1  | 3.024075  | 2.369662  | 0.660819  |
| 6  | 1.925477  | -2.47123  | -1.063534 |
| 1  | 1.715176  | -3.157016 | -1.892982 |
| 1  | 2.948428  | -2.108156 | -1.16818  |
| 1  | 1.850336  | -3.034625 | -0.130212 |
| 6  | -0.50619  | -1.899354 | -1.010442 |
| 1  | -0.694841 | -2.420617 | -0.068556 |
| 1  | -1.284132 | -1.16014  | -1.268977 |
| 1  | -0.639442 | -2.658559 | -1.788653 |

|   |          |           |           |
|---|----------|-----------|-----------|
| 6 | 0.969207 | -0.6403   | -2.51765  |
| 1 | 1.951618 | -0.230144 | -2.735825 |
| 1 | 0.742052 | -1.414572 | -3.260589 |
| 1 | 0.224129 | 0.149422  | -2.632771 |

**PC<sub>IIa-i</sub> 2**

E = -3995.208311      ZPVE = 0.346569      NIMAG = 0.

|    |           |           |           |
|----|-----------|-----------|-----------|
| 17 | -7.045019 | 0.026958  | 0.246462  |
| 15 | 2.729326  | 0.082392  | -0.334373 |
| 6  | 2.489619  | -1.705409 | 0.296396  |
| 6  | 2.264538  | 1.390553  | 0.977663  |
| 5  | 4.561414  | 0.362108  | -0.977382 |
| 1  | 4.662227  | -0.264574 | -2.011836 |
| 1  | 5.312224  | -0.049533 | -0.116734 |
| 1  | 4.688832  | 1.555688  | -1.159395 |
| 6  | 1.48821   | 0.230222  | -1.718326 |
| 1  | 1.397599  | -0.776016 | -2.138932 |
| 1  | 0.505837  | 0.472466  | -1.300517 |
| 6  | 1.857886  | 1.19747   | -2.853752 |
| 1  | 1.914677  | 2.235381  | -2.519275 |
| 1  | 2.822043  | 0.935769  | -3.296501 |
| 1  | 1.095785  | 1.141782  | -3.638684 |
| 12 | -4.770309 | -0.099686 | -0.032929 |
| 35 | -2.342295 | -0.067799 | -0.197283 |
| 6  | 1.006616  | -2.108381 | 0.433088  |
| 1  | 0.465829  | -2.037442 | -0.514106 |
| 1  | 0.960247  | -3.155631 | 0.756972  |
| 1  | 0.469783  | -1.511663 | 1.171373  |

|   |          |           |           |
|---|----------|-----------|-----------|
| 6 | 3.207135 | -1.905078 | 1.647393  |
| 1 | 3.189398 | -2.972096 | 1.900375  |
| 1 | 4.253814 | -1.590458 | 1.604276  |
| 1 | 2.714712 | -1.369967 | 2.463258  |
| 6 | 3.158581 | -2.634652 | -0.744303 |
| 1 | 3.017524 | -3.67403  | -0.424109 |
| 1 | 2.717167 | -2.536113 | -1.74107  |
| 1 | 4.230577 | -2.443818 | -0.82782  |
| 6 | 2.043706 | 2.731216  | 0.238841  |
| 1 | 1.89787  | 3.519039  | 0.987604  |
| 1 | 2.904    | 3.010208  | -0.375458 |
| 1 | 1.150387 | 2.711894  | -0.391428 |
| 6 | 0.984334 | 1.060428  | 1.768498  |
| 1 | 0.120725 | 0.890692  | 1.119862  |
| 1 | 1.107789 | 0.189988  | 2.417562  |
| 1 | 0.745102 | 1.914517  | 2.414424  |
| 6 | 3.447031 | 1.571842  | 1.955033  |
| 1 | 4.362144 | 1.857156  | 1.430505  |
| 1 | 3.196062 | 2.371278  | 2.662897  |
| 1 | 3.654102 | 0.670706  | 2.536268  |

**RCIIa-i 3**

E = -3995.124634      ZPVE = 0.342989      NIMAG = 0.

|    |           |           |           |
|----|-----------|-----------|-----------|
| 17 | -4.311822 | 0.291137  | -1.091024 |
| 15 | -2.864946 | 0.336542  | 0.427682  |
| 6  | -2.219613 | -1.453174 | 0.456322  |
| 6  | -1.632773 | 1.633192  | -0.226626 |
| 5  | -3.71237  | 0.868496  | 2.10342   |

|   |           |           |           |
|---|-----------|-----------|-----------|
| 1 | -2.777427 | 1.125312  | 2.834388  |
| 1 | -4.354805 | -0.081772 | 2.483691  |
| 1 | -4.388321 | 1.837457  | 1.852321  |
| 6 | 6.194678  | 1.192261  | 0.789473  |
| 1 | 6.131643  | 1.199878  | 1.888659  |
| 6 | 7.601995  | 0.731355  | 0.358877  |
| 1 | 7.720957  | 0.744376  | -0.732208 |
| 1 | 8.403249  | 1.365434  | 0.770678  |
| 1 | 7.814134  | -0.294508 | 0.686479  |
| 6 | -1.324114 | -1.605463 | 1.709655  |
| 1 | -1.845339 | -1.312643 | 2.624528  |
| 1 | -1.051143 | -2.663053 | 1.801088  |
| 1 | -0.395424 | -1.03688  | 1.631592  |
| 6 | -1.436056 | -1.846266 | -0.807158 |
| 1 | -1.213387 | -2.918448 | -0.755784 |
| 1 | -2.012439 | -1.670718 | -1.720267 |
| 1 | -0.4815   | -1.322506 | -0.878535 |
| 6 | -3.443352 | -2.386224 | 0.607752  |
| 1 | -3.071436 | -3.406709 | 0.75289   |
| 1 | -4.05946  | -2.125056 | 1.471512  |
| 1 | -4.072727 | -2.382786 | -0.285229 |
| 6 | -2.329788 | 3.004439  | -0.068341 |
| 1 | -1.645241 | 3.778206  | -0.434098 |
| 1 | -3.250781 | 3.068133  | -0.655223 |
| 1 | -2.56791  | 3.224734  | 0.974285  |
| 6 | -0.372674 | 1.599246  | 0.66712   |
| 1 | -0.614548 | 1.658291  | 1.732053  |
| 1 | 0.236334  | 0.71129   | 0.484498  |
| 1 | 0.241694  | 2.472611  | 0.41804   |
| 6 | -1.230449 | 1.441371  | -1.701584 |

|    |           |           |           |
|----|-----------|-----------|-----------|
| 1  | -2.097387 | 1.4225    | -2.366445 |
| 1  | -0.606456 | 2.293928  | -1.994269 |
| 1  | -0.643168 | 0.536884  | -1.862294 |
| 12 | 4.536627  | 0.074626  | 0.06674   |
| 35 | 2.460215  | -1.073246 | -0.603051 |
| 1  | 6.04372   | 2.239762  | 0.485706  |

**TS<sub>IIa-i</sub> 3**

E = -3995.051438    ZPVE = 0.345592    NIMAG = 1.

|    |           |           |           |
|----|-----------|-----------|-----------|
| 17 | 4.160732  | 0.503945  | 0.632893  |
| 15 | 1.729035  | -0.000036 | 0.449994  |
| 6  | 1.356617  | 1.779731  | -0.306201 |
| 6  | 2.13254   | -1.430481 | -0.868222 |
| 5  | 1.810145  | -0.208333 | 2.502411  |
| 1  | 0.677948  | -0.228167 | 2.917553  |
| 1  | 2.430458  | 0.757942  | 2.860253  |
| 1  | 2.409121  | -1.243179 | 2.677779  |
| 6  | -0.669323 | -0.639677 | 0.669078  |
| 1  | -0.704362 | 0.277582  | 1.246513  |
| 6  | -0.681039 | -1.981802 | 1.40736   |
| 1  | -1.165412 | -2.771702 | 0.821608  |
| 1  | 0.318105  | -2.341027 | 1.670512  |
| 1  | -1.225656 | -1.905409 | 2.354278  |
| 6  | -0.074109 | 1.926258  | -0.865355 |
| 1  | -0.835183 | 1.881111  | -0.084722 |
| 1  | -0.1538   | 2.919647  | -1.321635 |
| 1  | -0.30245  | 1.196404  | -1.647349 |
| 6  | 2.311261  | 2.195234  | -1.445876 |

|    |           |           |           |
|----|-----------|-----------|-----------|
| 1  | 2.151144  | 3.264018  | -1.634011 |
| 1  | 3.36022   | 2.046989  | -1.196569 |
| 1  | 2.086397  | 1.667778  | -2.37532  |
| 6  | 1.518847  | 2.758533  | 0.876645  |
| 1  | 1.287085  | 3.770233  | 0.521513  |
| 1  | 0.837744  | 2.526104  | 1.700429  |
| 1  | 2.538683  | 2.753727  | 1.26512   |
| 6  | 2.830133  | -2.550539 | -0.066351 |
| 1  | 3.080327  | -3.363441 | -0.759224 |
| 1  | 3.753585  | -2.198603 | 0.396136  |
| 1  | 2.187964  | -2.963144 | 0.714974  |
| 6  | 0.888772  | -2.019759 | -1.56571  |
| 1  | 0.215886  | -2.541278 | -0.887052 |
| 1  | 0.329384  | -1.26641  | -2.129376 |
| 1  | 1.242542  | -2.758337 | -2.294744 |
| 6  | 3.066118  | -0.963683 | -2.007618 |
| 1  | 3.961787  | -0.462591 | -1.648023 |
| 1  | 3.373739  | -1.858439 | -2.562679 |
| 1  | 2.548457  | -0.310591 | -2.713133 |
| 12 | -2.860334 | -0.310464 | 0.299716  |
| 35 | -5.177735 | 0.157033  | -0.17326  |
| 1  | -0.656598 | -0.587574 | -0.412952 |

**PCIIa-i 3**

E = -3995.205206    ZPVE = 0.346483    NIMAG = 0.

|    |           |           |           |
|----|-----------|-----------|-----------|
| 17 | 6.096745  | 1.174669  | -0.840184 |
| 15 | -2.618501 | 0.066412  | 0.213238  |
| 6  | -2.309643 | -1.170135 | -1.216303 |

|   |           |           |           |
|---|-----------|-----------|-----------|
| 6 | -1.887417 | 1.794935  | -0.148948 |
| 5 | -4.530922 | 0.164234  | 0.633164  |
| 1 | -4.92626  | -0.983606 | 0.676138  |
| 1 | -5.066857 | 0.801068  | -0.251005 |
| 1 | -4.626676 | 0.714273  | 1.709773  |
| 6 | -1.657574 | -0.65097  | 1.637241  |
| 1 | -2.077994 | -1.652325 | 1.76638   |
| 6 | -1.741292 | 0.082884  | 2.984711  |
| 1 | -1.202216 | 1.033613  | 2.977767  |
| 1 | -2.776967 | 0.279321  | 3.27417   |
| 1 | -1.286769 | -0.542312 | 3.76055   |
| 6 | -0.880719 | -1.118686 | -1.792102 |
| 1 | -0.112171 | -1.288815 | -1.033432 |
| 1 | -0.780337 | -1.91439  | -2.541171 |
| 1 | -0.665682 | -0.174106 | -2.297491 |
| 6 | -3.337387 | -0.91525  | -2.341727 |
| 1 | -3.188994 | -1.667868 | -3.125634 |
| 1 | -4.363178 | -1.004443 | -1.975748 |
| 1 | -3.224916 | 0.067021  | -2.80429  |
| 6 | -2.556062 | -2.598097 | -0.670141 |
| 1 | -2.558662 | -3.293696 | -1.517622 |
| 1 | -1.767097 | -2.922804 | 0.013228  |
| 1 | -3.520866 | -2.686853 | -0.163092 |
| 6 | -2.5328   | 2.790309  | 0.845675  |
| 1 | -2.113223 | 3.786294  | 0.657893  |
| 1 | -3.615525 | 2.845358  | 0.712732  |
| 1 | -2.333212 | 2.537924  | 1.888879  |
| 6 | -0.355724 | 1.83126   | 0.023301  |
| 1 | -0.044013 | 1.556564  | 1.034384  |
| 1 | 0.161176  | 1.170798  | -0.675274 |

|    |           |           |           |
|----|-----------|-----------|-----------|
| 1  | -0.004579 | 2.854009  | -0.162278 |
| 6  | -2.25901  | 2.264379  | -1.571702 |
| 1  | -3.338208 | 2.223565  | -1.745501 |
| 1  | -1.944201 | 3.3088    | -1.685822 |
| 1  | -1.756815 | 1.68723   | -2.351241 |
| 12 | 4.364171  | -0.057923 | 0.000893  |
| 35 | 2.30769   | -1.168823 | 0.683532  |
| 1  | -0.611761 | -0.781258 | 1.342108  |

**R1III + a S<sub>N</sub>2@P-b pathway 2 in THF**

**RCIIIa-i 2**

E = -4142.718661    ZPVE = 0.279860    NIMAG = 0.

|    |           |           |           |
|----|-----------|-----------|-----------|
| 17 | 4.91466   | 0.422311  | 1.252171  |
| 15 | 2.843168  | 0.190884  | 1.001082  |
| 5  | 1.975575  | 0.015156  | 2.722258  |
| 1  | 0.808937  | -0.123521 | 2.417782  |
| 1  | 2.205652  | 1.031585  | 3.334021  |
| 1  | 2.455734  | -0.982226 | 3.208193  |
| 6  | -2.372135 | -0.78545  | -0.077261 |
| 1  | -1.84672  | -0.09203  | 0.59673   |
| 6  | -1.979658 | -2.236215 | 0.270666  |
| 1  | -2.45713  | -2.960588 | -0.402202 |
| 1  | -0.895059 | -2.413287 | 0.207187  |
| 1  | -2.282257 | -2.507563 | 1.290144  |
| 6  | 2.375639  | 1.640067  | 0.005526  |
| 6  | 1.335646  | 2.46053   | 0.47036   |
| 6  | 3.037179  | 1.961548  | -1.192746 |
| 6  | 0.952466  | 3.584775  | -0.26672  |
| 1  | 0.828531  | 2.223382  | 1.399222  |



|    |           |           |           |
|----|-----------|-----------|-----------|
| 6  | 2.652699  | 3.08681   | -1.920401 |
| 1  | 3.852332  | 1.341873  | -1.553294 |
| 6  | 1.608775  | 3.897952  | -1.459158 |
| 1  | 0.146558  | 4.215206  | 0.09585   |
| 1  | 3.167597  | 3.332099  | -2.844098 |
| 1  | 1.312573  | 4.774156  | -2.028019 |
| 6  | 2.724491  | -1.279508 | -0.073843 |
| 6  | 3.327448  | -2.477602 | 0.34837   |
| 6  | 1.96066   | -1.264882 | -1.25122  |
| 6  | 3.182973  | -3.638433 | -0.4106   |
| 1  | 3.914445  | -2.504739 | 1.261068  |
| 6  | 1.816118  | -2.433691 | -2.0042   |
| 1  | 1.476647  | -0.353626 | -1.584226 |
| 6  | 2.427734  | -3.618218 | -1.588588 |
| 1  | 3.65758   | -4.557655 | -0.081528 |
| 1  | 1.224399  | -2.413488 | -2.914209 |
| 1  | 2.315691  | -4.523658 | -2.177305 |
| 12 | -4.43974  | -0.328076 | 0.012177  |
| 35 | -6.827736 | 0.213848  | 0.162888  |
| 1  | -2.012678 | -0.53812  | -1.088064 |

**TS<sub>IIIa-i</sub> 2**

E = -4142.683234      ZPVE = 0.281472      NIMAG = 1.

|    |           |           |           |
|----|-----------|-----------|-----------|
| 17 | -3.560768 | 1.566145  | -1.075331 |
| 15 | -1.543158 | 0.317133  | -0.905265 |
| 5  | -1.351697 | 0.13463   | -2.885958 |
| 1  | -0.410274 | -0.582336 | -3.123053 |
| 1  | -1.192462 | 1.283832  | -3.229235 |

|    |           |           |           |
|----|-----------|-----------|-----------|
| 1  | -2.410087 | -0.317326 | -3.250156 |
| 6  | 0.585267  | -0.931792 | -0.516881 |
| 1  | 0.823351  | -0.240015 | -1.319367 |
| 6  | 0.280894  | -2.391294 | -0.841034 |
| 1  | -0.295607 | -2.845637 | -0.030093 |
| 1  | -0.323783 | -2.461554 | -1.752779 |
| 1  | 1.152757  | -3.038995 | -1.005611 |
| 6  | -0.746465 | 1.678338  | 0.031403  |
| 6  | 0.347278  | 2.333135  | -0.558606 |
| 6  | -1.214666 | 2.120246  | 1.279038  |
| 6  | 0.973505  | 3.397031  | 0.097905  |
| 1  | 0.694581  | 2.039848  | -1.544502 |
| 6  | -0.578237 | 3.174576  | 1.93711   |
| 1  | -2.091432 | 1.66697   | 1.727054  |
| 6  | 0.519298  | 3.813877  | 1.351735  |
| 1  | 1.808998  | 3.902562  | -0.377175 |
| 1  | -0.952451 | 3.505571  | 2.901278  |
| 1  | 1.006444  | 4.639028  | 1.86236   |
| 6  | -2.358479 | -0.937092 | 0.154501  |
| 6  | -3.30579  | -1.768837 | -0.463229 |
| 6  | -2.055063 | -1.135229 | 1.509702  |
| 6  | -3.942382 | -2.776589 | 0.264516  |
| 1  | -3.552099 | -1.625577 | -1.510134 |
| 6  | -2.704153 | -2.13493  | 2.238204  |
| 1  | -1.311294 | -0.522522 | 2.007414  |
| 6  | -3.649239 | -2.958302 | 1.618743  |
| 1  | -4.671116 | -3.413306 | -0.22801  |
| 1  | -2.465799 | -2.271211 | 3.288889  |
| 1  | -4.149879 | -3.736934 | 2.186322  |
| 12 | 2.791466  | -0.775847 | -0.17365  |

|    |          |           |          |
|----|----------|-----------|----------|
| 35 | 5.196296 | -0.773378 | 0.075795 |
| 1  | 0.5005   | -0.557427 | 0.498502 |

**PCIIIa-i 2**

E = -4142.735465    ZPVE = 0.283944    NIMAG = 0.

|    |           |           |           |
|----|-----------|-----------|-----------|
| 17 | 8.352504  | -0.954724 | 0.555957  |
| 15 | 0.806474  | 0.104306  | 0.833889  |
| 5  | 1.116855  | 0.070747  | 2.757458  |
| 1  | 1.440216  | -1.066545 | 3.019495  |
| 1  | 0.043855  | 0.370655  | 3.244229  |
| 1  | 1.982553  | 0.880129  | 3.003249  |
| 6  | -0.654235 | -0.955558 | 0.384055  |
| 1  | -1.472349 | -0.527252 | 0.978561  |
| 6  | -0.452541 | -2.439997 | 0.722245  |
| 1  | 0.366994  | -2.873172 | 0.143083  |
| 1  | -0.222543 | -2.573698 | 1.782126  |
| 1  | -1.35505  | -3.017561 | 0.497399  |
| 6  | 0.359234  | 1.774338  | 0.204072  |
| 6  | -0.161553 | 2.719486  | 1.104097  |
| 6  | 0.514161  | 2.130031  | -1.146078 |
| 6  | -0.53345  | 3.990896  | 0.657286  |
| 1  | -0.261807 | 2.467735  | 2.154656  |
| 6  | 0.14327   | 3.401959  | -1.58917  |
| 1  | 0.943033  | 1.42746   | -1.853113 |
| 6  | -0.38349  | 4.333884  | -0.689305 |
| 1  | -0.926739 | 4.715037  | 1.364584  |
| 1  | 0.277533  | 3.66728   | -2.633591 |
| 1  | -0.662876 | 5.325117  | -1.033784 |

|    |           |           |           |
|----|-----------|-----------|-----------|
| 6  | 2.203519  | -0.495194 | -0.183722 |
| 6  | 3.504494  | -0.398356 | 0.338379  |
| 6  | 2.018855  | -1.047355 | -1.46319  |
| 6  | 4.602875  | -0.834807 | -0.407996 |
| 1  | 3.660076  | 0.012905  | 1.330664  |
| 6  | 3.116298  | -1.486415 | -2.207113 |
| 1  | 1.023998  | -1.147675 | -1.886077 |
| 6  | 4.407318  | -1.378508 | -1.681089 |
| 1  | 5.608027  | -0.762259 | 0.001428  |
| 1  | 2.960779  | -1.914055 | -3.193314 |
| 1  | 5.260662  | -1.722403 | -2.257801 |
| 12 | -4.383691 | -0.928149 | 0.053894  |
| 35 | -6.770243 | -0.939681 | -0.132411 |
| 1  | -0.886003 | -0.809505 | -0.675872 |

**R1iv + a SN2@P-b pathways 2, 3 and 4 in THF**

**RC<sub>iv</sub>-i 2**

E = -3950.979882    ZPVE = 0.227613    NIMAG = 0.

|    |           |           |           |
|----|-----------|-----------|-----------|
| 15 | -1.412982 | -1.311588 | 0.545089  |
| 5  | 0.517768  | -1.209194 | 0.47114   |
| 6  | 1.305693  | 2.714522  | 0.560039  |
| 12 | 2.20334   | 0.825281  | 0.145214  |
| 1  | 0.940191  | -2.296912 | 0.756136  |
| 1  | 0.818807  | -0.85447  | -0.648725 |
| 1  | 0.762862  | -0.381066 | 1.331074  |
| 6  | -2.050258 | -1.638083 | 2.218966  |
| 6  | -2.318803 | 0.088677  | -0.168085 |
| 17 | -2.061936 | -2.973264 | -0.529585 |
| 6  | 0.9124    | 2.960891  | 2.032166  |

|    |           |           |           |
|----|-----------|-----------|-----------|
| 1  | 0.409331  | 2.817597  | -0.072728 |
| 1  | 1.985718  | 3.515273  | 0.228638  |
| 35 | 4.257608  | -0.418227 | -0.479105 |
| 1  | -3.124085 | -1.832125 | 2.211932  |
| 1  | -1.827193 | -0.77681  | 2.855085  |
| 1  | -1.525613 | -2.51238  | 2.61085   |
| 6  | -1.888685 | 0.599335  | -1.406112 |
| 6  | -3.42252  | 0.667713  | 0.479454  |
| 1  | 1.787035  | 2.942394  | 2.695917  |
| 1  | 0.415404  | 3.931257  | 2.195564  |
| 1  | 0.221644  | 2.192216  | 2.405124  |
| 6  | -2.557974 | 1.675969  | -1.986509 |
| 1  | -1.039005 | 0.158468  | -1.917439 |
| 6  | -4.081924 | 1.751397  | -0.10442  |
| 1  | -3.771467 | 0.289029  | 1.433622  |
| 6  | -3.652773 | 2.254174  | -1.335667 |
| 1  | -2.222381 | 2.065466  | -2.942393 |
| 1  | -4.930315 | 2.199229  | 0.403224  |
| 1  | -4.169429 | 3.095128  | -1.78784  |

## TS<sub>IVa-i</sub> 2

E = -3950.952618    ZPVE = 0.230002    NIMAG = 1.

|    |           |           |           |
|----|-----------|-----------|-----------|
| 15 | -1.168632 | -1.13195  | -0.076257 |
| 5  | 0.191008  | -1.673339 | -1.408333 |
| 6  | 0.542788  | -0.096407 | 1.58971   |
| 12 | 1.763796  | -0.38238  | -0.237757 |
| 1  | -0.266624 | -2.346116 | -2.280055 |
| 1  | 0.622521  | -0.629813 | -1.880836 |

|    |           |           |           |
|----|-----------|-----------|-----------|
| 1  | 1.028604  | -2.282881 | -0.765528 |
| 6  | -1.598389 | -2.242216 | 1.319856  |
| 6  | -1.856235 | 0.558747  | 0.004347  |
| 17 | -3.000731 | -1.902429 | -1.270927 |
| 6  | 1.474728  | -0.868341 | 2.554391  |
| 1  | -0.419429 | 0.045109  | 2.07446   |
| 1  | 0.891795  | 0.946692  | 1.459725  |
| 35 | 4.019153  | 0.512329  | -0.379688 |
| 1  | -2.596761 | -1.999902 | 1.687113  |
| 1  | -0.874202 | -2.185809 | 2.128915  |
| 1  | -1.623576 | -3.25487  | 0.912946  |
| 6  | -1.482742 | 1.492399  | -0.972994 |
| 6  | -2.764865 | 0.929306  | 1.00622   |
| 1  | 2.525364  | -0.876334 | 2.235195  |
| 1  | 1.468139  | -0.422199 | 3.557948  |
| 1  | 1.173333  | -1.916476 | 2.664951  |
| 6  | -2.006511 | 2.787047  | -0.940136 |
| 1  | -0.790898 | 1.221898  | -1.76367  |
| 6  | -3.285462 | 2.224743  | 1.032448  |
| 1  | -3.078193 | 0.220407  | 1.765624  |
| 6  | -2.906543 | 3.15737   | 0.06254   |
| 1  | -1.710536 | 3.502294  | -1.701425 |
| 1  | -3.987208 | 2.502261  | 1.81308   |
| 1  | -3.311985 | 4.164111  | 0.086728  |

**PC<sub>IVa-i</sub> 2**

E = -3951.079788      ZPVE = 0.232100      NIMAG = 0.

|    |           |           |          |
|----|-----------|-----------|----------|
| 15 | -1.413541 | -0.855586 | 0.315509 |
|----|-----------|-----------|----------|

|    |           |           |           |
|----|-----------|-----------|-----------|
| 5  | 0.30906   | 0.008359  | 0.524706  |
| 6  | -1.900706 | -1.757815 | 1.850608  |
| 12 | 2.468049  | -0.040836 | -0.679327 |
| 1  | 0.499745  | 0.652933  | -0.495178 |
| 1  | 0.298963  | 0.725404  | 1.488509  |
| 1  | 1.111645  | -0.901044 | 0.671394  |
| 6  | -1.439731 | -2.072002 | -1.054207 |
| 6  | -2.754258 | 0.340401  | -0.015828 |
| 17 | 2.482173  | -1.164633 | -2.701148 |
| 6  | -0.912323 | -2.848032 | 2.288883  |
| 1  | -2.897989 | -2.180034 | 1.687343  |
| 1  | -1.998318 | -0.990524 | 2.626115  |
| 35 | 3.991676  | 1.10734   | 0.867536  |
| 1  | -1.215035 | -1.557117 | -1.991073 |
| 1  | -2.417243 | -2.554208 | -1.132072 |
| 1  | -0.674167 | -2.832119 | -0.881312 |
| 6  | -2.47646  | 1.715343  | -0.069043 |
| 6  | -4.073194 | -0.104371 | -0.214019 |
| 1  | 0.085608  | -2.439124 | 2.469917  |
| 1  | -1.261968 | -3.301824 | 3.22102   |
| 1  | -0.826657 | -3.644878 | 1.544118  |
| 6  | -3.503254 | 2.630472  | -0.31865  |
| 1  | -1.464243 | 2.075976  | 0.081315  |
| 6  | -5.095195 | 0.812729  | -0.463431 |
| 1  | -4.312265 | -1.163246 | -0.177001 |
| 6  | -4.811139 | 2.181538  | -0.516577 |
| 1  | -3.277653 | 3.691605  | -0.359366 |
| 1  | -6.110093 | 0.458804  | -0.616588 |
| 1  | -5.607141 | 2.893708  | -0.712034 |

**RC<sub>IVa-i</sub> 3**

E = -3950.979439    ZPVE = 0.226530    NIMAG = 0.

|    |           |           |           |
|----|-----------|-----------|-----------|
| 17 | -5.041137 | 0.592584  | 0.391392  |
| 15 | -2.959733 | 0.754598  | 0.583533  |
| 6  | -2.553269 | 2.007907  | -0.67831  |
| 1  | -2.940935 | 1.739162  | -1.66244  |
| 1  | -2.976797 | 2.965239  | -0.366337 |
| 1  | -1.46244  | 2.089784  | -0.721725 |
| 5  | -2.441521 | 1.23906   | 2.380288  |
| 1  | -1.233075 | 1.317972  | 2.277328  |
| 1  | -2.805942 | 0.362445  | 3.127006  |
| 1  | -2.967509 | 2.309968  | 2.576457  |
| 6  | 1.395611  | 1.735544  | -0.803037 |
| 1  | 0.863507  | 1.999702  | 0.12365   |
| 6  | 1.512559  | 2.979212  | -1.706457 |
| 1  | 2.004684  | 2.746541  | -2.65944  |
| 1  | 0.535472  | 3.422625  | -1.958416 |
| 1  | 2.102611  | 3.773952  | -1.232586 |
| 6  | -2.334147 | -0.840001 | -0.031648 |
| 6  | -1.721223 | -1.713706 | 0.881204  |
| 6  | -2.443799 | -1.210416 | -1.38316  |
| 6  | -1.215345 | -2.940377 | 0.442978  |
| 1  | -1.637524 | -1.436025 | 1.926446  |
| 6  | -1.939969 | -2.437564 | -1.813983 |
| 1  | -2.924318 | -0.552825 | -2.100473 |
| 6  | -1.323627 | -3.302365 | -0.902104 |
| 1  | -0.740169 | -3.610231 | 1.152939  |
| 1  | -2.028215 | -2.718655 | -2.858837 |



|    |           |           |           |
|----|-----------|-----------|-----------|
| 1  | -0.931524 | -4.256591 | -1.240939 |
| 12 | 3.196651  | 0.765866  | -0.211926 |
| 35 | 5.25875   | -0.387948 | 0.460445  |
| 1  | 0.76831   | 0.97711   | -1.296105 |

**TS<sub>IVa-i</sub> 3**

E = -3950.942673    ZPVE = 0.227877    NIMAG = 1.

|    |           |           |           |
|----|-----------|-----------|-----------|
| 17 | 4.413769  | -0.005052 | 0.037705  |
| 15 | 2.183101  | -0.834324 | 0.089286  |
| 6  | 2.479344  | -1.579195 | -1.574585 |
| 1  | 2.747751  | -0.803244 | -2.292757 |
| 1  | 3.334727  | -2.248831 | -1.468075 |
| 1  | 1.617421  | -2.139992 | -1.93207  |
| 5  | 2.451557  | -1.805481 | 1.812024  |
| 1  | 1.417385  | -2.344394 | 2.121924  |
| 1  | 2.795171  | -0.933643 | 2.57647   |
| 1  | 3.347217  | -2.576095 | 1.552371  |
| 6  | -0.168165 | -1.516353 | -0.063558 |
| 1  | -0.146212 | -1.056097 | 0.920659  |
| 6  | -0.189141 | -3.037303 | -0.19533  |
| 1  | -0.417708 | -3.336865 | -1.22333  |
| 1  | 0.772408  | -3.493179 | 0.073685  |
| 1  | -0.938141 | -3.514422 | 0.447791  |
| 6  | 1.521107  | 0.874161  | 0.003521  |
| 6  | 1.165267  | 1.50318   | 1.207417  |
| 6  | 1.336753  | 1.557706  | -1.208034 |
| 6  | 0.634642  | 2.796263  | 1.197601  |
| 1  | 1.316229  | 0.991473  | 2.153061  |

|    |           |           |           |
|----|-----------|-----------|-----------|
| 6  | 0.804821  | 2.849939  | -1.213103 |
| 1  | 1.610733  | 1.097818  | -2.152056 |
| 6  | 0.450866  | 3.472354  | -0.011802 |
| 1  | 0.3696    | 3.273524  | 2.136402  |
| 1  | 0.670469  | 3.369711  | -2.157146 |
| 1  | 0.040059  | 4.477356  | -0.018676 |
| 12 | -2.272294 | -0.810584 | -0.027781 |
| 35 | -4.554366 | -0.00131  | 0.018566  |
| 1  | -0.118118 | -0.886648 | -0.947855 |

**PC<sub>IVa-i</sub> 3**

E = -3951.079780      ZPVE = 0.231915      NIMAG = 0.

|    |           |           |           |
|----|-----------|-----------|-----------|
| 17 | -2.877983 | 1.881226  | -2.066273 |
| 15 | 1.429491  | 0.813691  | 0.337921  |
| 6  | 1.393018  | 2.117327  | -0.948613 |
| 1  | 1.192515  | 1.65479   | -1.917862 |
| 1  | 0.592469  | 2.826871  | -0.727213 |
| 1  | 2.345971  | 2.650046  | -0.992826 |
| 5  | -0.272224 | -0.096429 | 0.534969  |
| 1  | -0.185169 | -0.977917 | 1.344956  |
| 1  | -0.565739 | -0.539183 | -0.566117 |
| 1  | -1.052156 | 0.756404  | 0.930179  |
| 6  | 1.949635  | 1.626699  | 1.911602  |
| 1  | 2.038608  | 0.82115   | 2.648401  |
| 6  | 0.990807  | 2.716982  | 2.411355  |
| 1  | 0.918719  | 3.551033  | 1.707061  |
| 1  | -0.015228 | 2.323548  | 2.581421  |
| 1  | 1.358375  | 3.116671  | 3.361131  |

|    |           |           |           |
|----|-----------|-----------|-----------|
| 6  | 2.778332  | -0.335489 | -0.107701 |
| 6  | 2.519361  | -1.709056 | -0.237671 |
| 6  | 4.085539  | 0.141601  | -0.310153 |
| 6  | 3.554592  | -2.592376 | -0.557233 |
| 1  | 1.5155    | -2.092946 | -0.091122 |
| 6  | 5.115344  | -0.743844 | -0.631764 |
| 1  | 4.310531  | 1.20061   | -0.220822 |
| 6  | 4.851417  | -2.112302 | -0.754003 |
| 1  | 3.343917  | -3.653086 | -0.653099 |
| 1  | 6.121249  | -0.365634 | -0.786141 |
| 1  | 5.654414  | -2.799957 | -1.001608 |
| 12 | -2.496254 | 0.245322  | -0.479317 |
| 35 | -3.861632 | -1.480329 | 0.60304   |
| 1  | 2.954393  | 2.033909  | 1.757139  |

**RC<sub>IVa-i</sub> 4**

E = -3950.979552      ZPVE = 0.226799      NIMAG = 0.

|    |           |           |           |
|----|-----------|-----------|-----------|
| 17 | 5.066495  | -0.505729 | -0.251793 |
| 15 | 3.357173  | 0.667332  | 0.062668  |
| 5  | 3.550106  | 1.816627  | 1.602984  |
| 1  | 2.498463  | 2.426693  | 1.587075  |
| 1  | 4.504846  | 2.513808  | 1.348186  |
| 1  | 3.689389  | 1.12187   | 2.580911  |
| 6  | -3.005124 | 3.13718   | -0.634809 |
| 1  | -1.99489  | 3.207532  | -1.066651 |
| 1  | -3.685605 | 3.457151  | -1.439163 |
| 6  | -3.12461  | 4.110889  | 0.555765  |
| 1  | -4.133672 | 4.105842  | 0.987664  |

|    |           |           |           |
|----|-----------|-----------|-----------|
| 1  | -2.432974 | 3.851885  | 1.367618  |
| 1  | -2.90695  | 5.154496  | 0.277692  |
| 12 | -3.40725  | 1.086216  | -0.245761 |
| 35 | -3.943813 | -1.307106 | -0.033461 |
| 6  | 3.220303  | 1.566207  | -1.520137 |
| 1  | 2.306019  | 2.16614   | -1.488403 |
| 1  | 4.080525  | 2.232837  | -1.613164 |
| 1  | 3.187989  | 0.891246  | -2.376687 |
| 6  | 1.996776  | -0.538158 | 0.119809  |
| 6  | 1.540361  | -1.206422 | -1.029814 |
| 6  | 1.399295  | -0.807458 | 1.36281   |
| 6  | 0.497553  | -2.127894 | -0.933893 |
| 1  | 1.996618  | -1.021871 | -1.997058 |
| 6  | 0.35477   | -1.730624 | 1.4514    |
| 1  | 1.747419  | -0.296779 | 2.254412  |
| 6  | -0.097344 | -2.389719 | 0.305349  |
| 1  | 0.148243  | -2.639822 | -1.825171 |
| 1  | -0.103702 | -1.933108 | 2.414334  |
| 1  | -0.911682 | -3.103542 | 0.375296  |

**TS<sub>IVa-i</sub> 4**

E = -3950.934416    ZPVE = 0.229228    NIMAG = 1.

|    |           |           |           |
|----|-----------|-----------|-----------|
| 17 | -3.690194 | 1.031781  | -0.467552 |
| 15 | -1.980405 | -0.590979 | -0.121471 |
| 5  | -2.994173 | -1.453995 | 1.367885  |
| 1  | -2.30993  | -2.292217 | 1.888885  |
| 1  | -3.938737 | -1.902804 | 0.757507  |
| 1  | -3.283808 | -0.529777 | 2.086148  |

|    |           |           |           |
|----|-----------|-----------|-----------|
| 6  | -0.334254 | -2.474605 | -0.045516 |
| 1  | -1.300811 | -2.938747 | -0.234813 |
| 1  | 0.248036  | -2.785159 | -0.937772 |
| 6  | 0.262478  | -3.106309 | 1.230867  |
| 1  | 1.312729  | -2.841977 | 1.414175  |
| 1  | -0.305069 | -2.811485 | 2.117018  |
| 1  | 0.236959  | -4.202359 | 1.174394  |
| 12 | 1.063632  | -0.781169 | -0.158031 |
| 35 | 3.41932   | -0.221948 | -0.380438 |
| 6  | -2.077428 | -0.99061  | -1.922955 |
| 1  | -1.24102  | -1.600356 | -2.260421 |
| 1  | -3.009733 | -1.544268 | -2.060919 |
| 1  | -2.143678 | -0.074126 | -2.508136 |
| 6  | -0.777327 | 0.771719  | 0.189376  |
| 6  | -0.343644 | 1.652474  | -0.824561 |
| 6  | -0.377772 | 1.012942  | 1.523444  |
| 6  | 0.483725  | 2.73362   | -0.511404 |
| 1  | -0.663248 | 1.50842   | -1.851056 |
| 6  | 0.453379  | 2.095442  | 1.824107  |
| 1  | -0.732279 | 0.364797  | 2.319316  |
| 6  | 0.879051  | 2.958576  | 0.810141  |
| 1  | 0.812352  | 3.400345  | -1.302008 |
| 1  | 0.755819  | 2.268159  | 2.851782  |
| 1  | 1.523591  | 3.798663  | 1.047639  |

**PC<sub>IVa-i</sub> 4**

E = -3951.072743      ZPVE = 0.229983      NIMAG = 0.

|    |          |          |           |
|----|----------|----------|-----------|
| 17 | 6.267447 | 0.957203 | -0.001708 |
|----|----------|----------|-----------|

|    |           |           |           |
|----|-----------|-----------|-----------|
| 15 | -2.695373 | -1.047217 | -0.422454 |
| 5  | -4.524194 | -1.616106 | -0.752109 |
| 1  | -5.198066 | -1.293362 | 0.203591  |
| 1  | -4.43754  | -2.822924 | -0.873471 |
| 1  | -4.877852 | -1.07259  | -1.779235 |
| 6  | -1.915868 | -1.853531 | 1.048959  |
| 1  | -1.970999 | -2.93085  | 0.851914  |
| 1  | -0.853793 | -1.585328 | 1.053708  |
| 6  | -2.576994 | -1.517344 | 2.39086   |
| 1  | -2.521698 | -0.445935 | 2.607653  |
| 1  | -3.630143 | -1.812562 | 2.404749  |
| 1  | -2.066171 | -2.048526 | 3.200385  |
| 12 | 4.26561   | -0.156452 | -0.005836 |
| 35 | 1.959732  | -0.952933 | -0.035155 |
| 6  | -1.566001 | -1.49853  | -1.801164 |
| 1  | -0.52201  | -1.342114 | -1.51832  |
| 1  | -1.717168 | -2.555531 | -2.038035 |
| 1  | -1.805736 | -0.900742 | -2.683627 |
| 6  | -2.499575 | 0.761607  | -0.181759 |
| 6  | -1.236458 | 1.347112  | 0.014429  |
| 6  | -3.638791 | 1.581791  | -0.197215 |
| 6  | -1.120568 | 2.727825  | 0.189688  |
| 1  | -0.337887 | 0.737524  | 0.031594  |
| 6  | -3.518888 | 2.963841  | -0.02041  |
| 1  | -4.618206 | 1.139971  | -0.347739 |
| 6  | -2.260445 | 3.538844  | 0.173099  |
| 1  | -0.139859 | 3.170053  | 0.339673  |
| 1  | -4.407933 | 3.587395  | -0.034647 |
| 1  | -2.166392 | 4.612239  | 0.309736  |

**R1v + a** S<sub>N</sub>2@P-b pathways 2 in THF

**RC<sub>Va-i</sub> 2**

E = -3759.236255      ZPVE = 0.172771      NIMAG = 0.

|    |           |           |           |
|----|-----------|-----------|-----------|
| 17 | -5.127725 | -0.935682 | -0.657241 |
| 15 | -3.392335 | -0.209838 | 0.247563  |
| 6  | -2.068092 | -0.944467 | -0.77199  |
| 1  | -2.080042 | -2.03029  | -0.655034 |
| 1  | -2.186164 | -0.681379 | -1.825264 |
| 1  | -1.113083 | -0.559096 | -0.401602 |
| 6  | -3.426743 | 1.564936  | -0.176838 |
| 1  | -3.490449 | 1.711476  | -1.257228 |
| 1  | -4.279536 | 2.038552  | 0.314407  |
| 1  | -2.504879 | 2.017722  | 0.201589  |
| 5  | -3.293206 | -0.610286 | 2.129779  |
| 1  | -2.225214 | -0.095325 | 2.407461  |
| 1  | -3.279506 | -1.814767 | 2.234052  |
| 1  | -4.233379 | -0.064442 | 2.658687  |
| 6  | 1.464217  | 2.319304  | 0.351795  |
| 1  | 0.464734  | 1.971242  | 0.047669  |
| 1  | 1.378404  | 2.532578  | 1.428467  |
| 6  | 1.805701  | 3.619826  | -0.40426  |
| 1  | 2.776636  | 4.027891  | -0.095597 |
| 1  | 1.861475  | 3.460857  | -1.488911 |
| 1  | 1.063758  | 4.417566  | -0.24025  |
| 12 | 2.809397  | 0.690926  | 0.132304  |
| 35 | 4.343039  | -1.213591 | -0.059931 |

**TS<sub>Va-i</sub> 2**

E = -3759.181589    ZPVE = 0.177216    NIMAG = 1.

|    |           |           |           |
|----|-----------|-----------|-----------|
| 17 | -3.454887 | -1.736933 | -0.302935 |
| 15 | -1.931224 | 0.085281  | 0.114122  |
| 6  | -1.354349 | -0.863253 | 1.597291  |
| 1  | -2.240463 | -1.261529 | 2.092006  |
| 1  | -0.722011 | -1.705796 | 1.303971  |
| 1  | -0.816527 | -0.209853 | 2.286814  |
| 6  | -1.161064 | -0.309661 | -1.52815  |
| 1  | -0.4611   | -1.149325 | -1.454684 |
| 1  | -1.955862 | -0.604043 | -2.213526 |
| 1  | -0.660462 | 0.575422  | -1.926729 |
| 5  | -3.41456  | 1.405281  | 0.297638  |
| 1  | -2.962156 | 2.489377  | 0.566798  |
| 1  | -4.062597 | 0.918689  | 1.196776  |
| 1  | -3.977818 | 1.363261  | -0.771885 |
| 6  | -0.284238 | 1.802024  | 0.556647  |
| 1  | -1.010805 | 2.01831   | 1.340206  |
| 1  | 0.635734  | 1.974636  | 1.171213  |
| 6  | -0.349742 | 2.896876  | -0.525095 |
| 1  | 0.38828   | 2.769825  | -1.326172 |
| 1  | -1.334668 | 2.903729  | -0.999462 |
| 1  | -0.189983 | 3.895497  | -0.099947 |
| 12 | 1.389248  | 0.377017  | 0.127878  |
| 35 | 3.610573  | -0.526745 | -0.038691 |

**PC<sub>Va-i</sub> 2**

E = -3759.323898    ZPVE = 0.175222    NIMAG = 0.



|    |           |           |           |
|----|-----------|-----------|-----------|
| 17 | -0.537176 | -0.702559 | 0.686467  |
| 15 | 3.936439  | -0.238547 | -0.209592 |
| 6  | 3.147668  | -1.52513  | -1.253491 |
| 1  | 3.658252  | -2.479397 | -1.098414 |
| 1  | 2.088786  | -1.634495 | -1.003159 |
| 1  | 3.245853  | -1.246858 | -2.306386 |
| 6  | 3.60056   | -0.769834 | 1.515219  |
| 1  | 2.526649  | -0.887325 | 1.684959  |
| 1  | 4.102948  | -1.723764 | 1.697782  |
| 1  | 4.00169   | -0.031721 | 2.214293  |
| 5  | 5.823744  | -0.000802 | -0.598355 |
| 1  | 6.24546   | 0.839525  | 0.170726  |
| 1  | 5.885079  | 0.356064  | -1.759829 |
| 1  | 6.334959  | -1.089862 | -0.419325 |
| 6  | 2.895298  | 1.262052  | -0.4859   |
| 1  | 2.970627  | 1.48733   | -1.556238 |
| 1  | 1.854553  | 0.98453   | -0.283313 |
| 6  | 3.306507  | 2.486111  | 0.344279  |
| 1  | 3.205076  | 2.29983   | 1.418185  |
| 1  | 4.342637  | 2.774747  | 0.146485  |
| 1  | 2.664798  | 3.337676  | 0.095968  |
| 12 | -2.739952 | -0.28136  | 0.259389  |
| 35 | -5.056613 | 0.205616  | -0.239124 |

**R1<sub>IV</sub> + a S<sub>N</sub>2@P-f pathway 2 in THF**

**RC<sub>IVa-r</sub> 2**

E = -3950.981262      ZPVE = 0.227867      NIMAG = 0.

|    |           |          |          |
|----|-----------|----------|----------|
| 17 | 1.314569  | 2.411279 | 0.444912 |
| 6  | -3.157201 | 2.135343 | 1.357742 |

|    |           |           |           |
|----|-----------|-----------|-----------|
| 1  | -4.044068 | 1.971833  | 1.990962  |
| 1  | -2.345811 | 2.387261  | 2.059502  |
| 6  | -3.413563 | 3.339867  | 0.427714  |
| 1  | -2.539184 | 3.564188  | -0.198034 |
| 1  | -4.250161 | 3.154586  | -0.259062 |
| 1  | -3.654086 | 4.268208  | 0.971471  |
| 15 | 1.364513  | 0.672077  | -0.696384 |
| 12 | -2.683618 | 0.277811  | 0.417375  |
| 35 | -3.624243 | -1.938046 | -0.242744 |
| 6  | 1.812772  | 1.281891  | -2.354076 |
| 1  | 1.013807  | 1.929337  | -2.721905 |
| 1  | 2.755221  | 1.831827  | -2.337046 |
| 1  | 1.907123  | 0.413883  | -3.013451 |
| 5  | -0.326976 | -0.261161 | -0.636422 |
| 1  | -0.54571  | -0.525162 | 0.527474  |
| 1  | -1.134064 | 0.486734  | -1.151827 |
| 1  | -0.158886 | -1.251767 | -1.300669 |
| 6  | 2.771054  | -0.278479 | -0.056753 |
| 6  | 4.084831  | 0.214978  | -0.144713 |
| 6  | 2.533173  | -1.535733 | 0.522472  |
| 6  | 5.147404  | -0.547719 | 0.337729  |
| 1  | 4.283769  | 1.191032  | -0.576116 |
| 6  | 3.604191  | -2.29587  | 0.998652  |
| 1  | 1.523604  | -1.924563 | 0.596163  |
| 6  | 4.90821   | -1.803938 | 0.907099  |
| 1  | 6.160111  | -0.163196 | 0.269624  |
| 1  | 3.415982  | -3.269218 | 1.440438  |
| 1  | 5.738569  | -2.396232 | 1.279188  |

**TS<sub>IVa-r</sub> 2**

E = -3950.925514    ZPVE = 0.229989    NIMAG = 1.

|    |           |           |           |
|----|-----------|-----------|-----------|
| 17 | 0.728702  | -0.023415 | 1.953227  |
| 6  | -1.190184 | 1.697702  | 0.477204  |
| 1  | -1.774881 | 1.271882  | 1.31613   |
| 1  | -0.515858 | 2.372994  | 0.999812  |
| 6  | -2.09628  | 2.475529  | -0.496744 |
| 1  | -1.572406 | 2.777389  | -1.409329 |
| 1  | -2.97781  | 1.906836  | -0.821446 |
| 1  | -2.483947 | 3.3899    | -0.027487 |
| 15 | 0.873141  | 0.600229  | -0.263403 |
| 12 | -1.873633 | -0.350875 | -0.180528 |
| 35 | -4.236346 | -0.876231 | 0.01582   |
| 6  | 1.307921  | 2.299782  | -0.831073 |
| 1  | 0.439481  | 2.789301  | -1.263973 |
| 1  | 1.672989  | 2.902679  | 0.004373  |
| 1  | 2.10015   | 2.211492  | -1.578347 |
| 5  | -0.037689 | -0.513595 | -1.612607 |
| 1  | -0.441077 | -1.51356  | -1.021396 |
| 1  | -0.954618 | 0.176046  | -2.022901 |
| 1  | 0.696155  | -0.861348 | -2.493044 |
| 6  | 2.618571  | -0.097154 | -0.187501 |
| 6  | 3.717438  | 0.688113  | 0.197017  |
| 6  | 2.84175   | -1.441186 | -0.525849 |
| 6  | 5.006538  | 0.149394  | 0.225376  |
| 1  | 3.58296   | 1.724972  | 0.487863  |
| 6  | 4.130869  | -1.980979 | -0.498167 |
| 1  | 2.013046  | -2.076601 | -0.818971 |
| 6  | 5.218387  | -1.187556 | -0.123619 |

|   |          |           |           |
|---|----------|-----------|-----------|
| 1 | 5.84289  | 0.775567  | 0.522711  |
| 1 | 4.281806 | -3.021908 | -0.769563 |
| 1 | 6.220167 | -1.60632  | -0.102434 |

**PC<sub>IVa-r</sub> 2**

E = -3951.079256    ZPVE = 0.232717    NIMAG = 0.

|    |              |              |              |
|----|--------------|--------------|--------------|
| 17 | 2.225913000  | 1.944854000  | -2.113522000 |
| 6  | -1.540359000 | 2.280563000  | -0.049722000 |
| 1  | -1.252211000 | 2.130572000  | -1.095655000 |
| 1  | -2.593243000 | 2.580955000  | -0.043983000 |
| 6  | -0.668862000 | 3.363056000  | 0.603159000  |
| 1  | -0.980005000 | 3.570881000  | 1.631029000  |
| 1  | 0.387872000  | 3.084007000  | 0.609492000  |
| 1  | -0.761013000 | 4.292849000  | 0.034190000  |
| 15 | -1.427100000 | 0.621661000  | 0.751704000  |
| 12 | 2.443559000  | 0.263669000  | -0.527585000 |
| 35 | 4.047167000  | -1.305912000 | 0.455462000  |
| 6  | -1.870538000 | 0.850280000  | 2.515488000  |
| 1  | -1.099189000 | 1.445791000  | 3.009970000  |
| 1  | -2.836028000 | 1.351802000  | 2.616902000  |
| 1  | -1.919196000 | -0.130168000 | 2.995021000  |
| 5  | 0.309332000  | -0.227552000 | 0.599296000  |
| 1  | 0.497056000  | -0.428811000 | -0.591922000 |
| 1  | 1.119306000  | 0.547444000  | 1.085439000  |
| 1  | 0.301064000  | -1.265527000 | 1.205620000  |
| 6  | -2.747401000 | -0.401505000 | 0.008545000  |
| 6  | -4.079687000 | 0.047754000  | -0.005317000 |
| 6  | -2.439069000 | -1.653373000 | -0.546853000 |

|   |              |              |              |
|---|--------------|--------------|--------------|
| 6 | -5.083156000 | -0.741786000 | -0.568931000 |
| 1 | -4.345768000 | 1.010794000  | 0.420427000  |
| 6 | -3.447111000 | -2.440955000 | -1.110257000 |
| 1 | -1.417507000 | -2.018021000 | -0.540153000 |
| 6 | -4.767965000 | -1.986895000 | -1.123283000 |
| 1 | -6.108362000 | -0.384515000 | -0.575483000 |
| 1 | -3.196588000 | -3.406933000 | -1.537720000 |
| 1 | -5.549851000 | -2.599216000 | -1.562303000 |

**R1<sub>II</sub> + b S<sub>N</sub>2@P-b pathway 2 in THF**

**RC<sub>IIb-i</sub> 2**

E = -4262.101947      ZPVE = 0.402007      NIMAG = 0.

|    |           |           |           |
|----|-----------|-----------|-----------|
| 17 | -5.700521 | -0.580957 | 0.474105  |
| 15 | -3.617119 | -0.710729 | 0.680007  |
| 12 | 2.958758  | 1.048291  | -0.167943 |
| 35 | 1.048781  | 2.174114  | -1.195686 |
| 6  | -3.086098 | -1.401984 | -1.013614 |
| 6  | -3.104294 | 1.090111  | 1.015286  |
| 6  | 4.609172  | 0.272978  | 0.916734  |
| 6  | 4.87949   | -0.751174 | -0.001047 |
| 6  | 5.474145  | 0.340925  | 2.015541  |
| 6  | 5.91461   | -1.677119 | 0.108567  |
| 6  | 6.537131  | -0.566116 | 2.178971  |
| 1  | 5.33203   | 1.110687  | 2.772938  |
| 6  | 6.751862  | -1.568279 | 1.230689  |
| 1  | 6.085368  | -2.455912 | -0.627298 |
| 1  | 7.19198   | -0.490493 | 3.043368  |
| 1  | 7.570544  | -2.271974 | 1.352972  |
| 8  | 3.957596  | -0.724734 | -1.071265 |

|   |           |           |           |
|---|-----------|-----------|-----------|
| 6 | 4.066359  | -1.672702 | -2.138881 |
| 1 | 3.953163  | -2.692854 | -1.758437 |
| 1 | 3.257389  | -1.447059 | -2.833254 |
| 1 | 5.030478  | -1.56868  | -2.646975 |
| 5 | -3.188593 | -1.907168 | 2.160106  |
| 1 | -1.997974 | -2.10915  | 2.031889  |
| 1 | -3.454252 | -1.309414 | 3.176268  |
| 1 | -3.851673 | -2.903711 | 1.999832  |
| 6 | -1.547038 | -1.312094 | -1.120934 |
| 1 | -1.238076 | -1.873475 | -2.010394 |
| 1 | -1.193959 | -0.285814 | -1.246516 |
| 1 | -1.0448   | -1.758374 | -0.257931 |
| 6 | -3.50539  | -2.890375 | -1.021997 |
| 1 | -4.586132 | -3.012995 | -0.905658 |
| 1 | -3.222124 | -3.318856 | -1.990165 |
| 1 | -3.006063 | -3.461016 | -0.236355 |
| 6 | -3.738075 | -0.694529 | -2.216598 |
| 1 | -3.40993  | -1.206428 | -3.128603 |
| 1 | -4.828819 | -0.747816 | -2.180864 |
| 1 | -3.443972 | 0.351855  | -2.303706 |
| 6 | -3.295179 | 2.028567  | -0.189154 |
| 1 | -4.31675  | 1.997555  | -0.579105 |
| 1 | -3.096645 | 3.055321  | 0.139033  |
| 1 | -2.597293 | 1.808943  | -0.99998  |
| 6 | -1.618058 | 1.069215  | 1.442083  |
| 1 | -0.958749 | 0.779941  | 0.622323  |
| 1 | -1.335623 | 2.087684  | 1.731487  |
| 1 | -1.445507 | 0.409893  | 2.296405  |
| 6 | -3.954357 | 1.60632   | 2.199027  |
| 1 | -3.565653 | 2.589633  | 2.486892  |

|   |           |          |          |
|---|-----------|----------|----------|
| 1 | -5.005624 | 1.7273   | 1.927289 |
| 1 | -3.891611 | 0.950185 | 3.070526 |

**TS<sub>nb-i</sub> 2**

E = -4262.008111      ZPVE = 0.404292      NIMAG = 1.

|    |           |           |           |
|----|-----------|-----------|-----------|
| 17 | -4.385333 | -0.494016 | -0.152525 |
| 15 | -1.764956 | 0.130908  | -0.07919  |
| 12 | 2.080363  | -0.204249 | 0.060132  |
| 35 | 3.645362  | -2.025294 | -0.094435 |
| 6  | -1.58823  | -0.125008 | 1.842872  |
| 6  | -1.500653 | -1.532571 | -1.120042 |
| 6  | 0.388088  | 1.105663  | -0.659311 |
| 6  | 1.11025   | 2.05606   | 0.104199  |
| 6  | 0.197996  | 1.491163  | -2.010122 |
| 6  | 1.458875  | 3.332621  | -0.335783 |
| 6  | 0.579593  | 2.734498  | -2.51112  |
| 1  | -0.30856  | 0.814831  | -2.689208 |
| 6  | 1.161537  | 3.674819  | -1.657423 |
| 1  | 1.987826  | 4.031205  | 0.301895  |
| 1  | 0.395789  | 2.980423  | -3.552131 |
| 1  | 1.422051  | 4.663223  | -2.023219 |
| 8  | 1.64749   | 1.509727  | 1.289827  |
| 6  | 2.350366  | 2.35005   | 2.232144  |
| 1  | 1.688628  | 3.147639  | 2.576461  |
| 1  | 2.614309  | 1.698832  | 3.064139  |
| 1  | 3.252173  | 2.767862  | 1.777567  |
| 5  | -2.512938 | 1.967903  | -0.663236 |
| 1  | -1.634173 | 2.755275  | -0.428583 |

|   |           |           |           |
|---|-----------|-----------|-----------|
| 1 | -2.733172 | 1.817255  | -1.842324 |
| 1 | -3.494713 | 2.125525  | 0.009579  |
| 6 | -0.299917 | -0.875753 | 2.228046  |
| 1 | -0.318263 | -1.070173 | 3.306721  |
| 1 | -0.20119  | -1.844571 | 1.733653  |
| 1 | 0.576385  | -0.257251 | 2.048779  |
| 6 | -1.570382 | 1.293205  | 2.454356  |
| 1 | -2.517568 | 1.808801  | 2.282515  |
| 1 | -1.423765 | 1.200585  | 3.537307  |
| 1 | -0.767923 | 1.915875  | 2.057059  |
| 6 | -2.767869 | -0.891106 | 2.484736  |
| 1 | -2.561817 | -0.948102 | 3.560867  |
| 1 | -3.716729 | -0.380238 | 2.337345  |
| 1 | -2.868822 | -1.90855  | 2.106213  |
| 6 | -2.095727 | -2.762517 | -0.396489 |
| 1 | -3.156578 | -2.645471 | -0.187535 |
| 1 | -1.965071 | -3.62668  | -1.058966 |
| 1 | -1.567422 | -2.989634 | 0.532893  |
| 6 | -0.021044 | -1.871592 | -1.375779 |
| 1 | 0.509366  | -2.111027 | -0.4493   |
| 1 | 0.020892  | -2.785493 | -1.978801 |
| 1 | 0.509847  | -1.100646 | -1.930402 |
| 6 | -2.199474 | -1.351007 | -2.485549 |
| 1 | -2.058007 | -2.271954 | -3.063997 |
| 1 | -3.268092 | -1.176588 | -2.366761 |
| 1 | -1.778094 | -0.52848  | -3.068227 |

**PC<sub>11b-i</sub> 2**

E = -4262.155207    ZPVE = 0.407411    NIMAG = 0.



|    |           |           |           |
|----|-----------|-----------|-----------|
| 17 | 3.056723  | 3.213871  | -0.048036 |
| 15 | -2.31896  | -0.206853 | 0.044082  |
| 12 | 2.469015  | 1.009417  | 0.229177  |
| 35 | 3.282678  | -1.108897 | 1.102138  |
| 6  | -2.495389 | 1.637424  | -0.4514   |
| 6  | -1.881245 | -0.471231 | 1.894815  |
| 6  | -0.949658 | -1.076916 | -0.914673 |
| 6  | 0.351361  | -0.688408 | -1.308277 |
| 6  | -1.298514 | -2.410185 | -1.233746 |
| 6  | 1.229866  | -1.575135 | -1.93477  |
| 6  | -0.433525 | -3.298356 | -1.869706 |
| 1  | -2.290358 | -2.755866 | -0.97509  |
| 6  | 0.848859  | -2.882731 | -2.218617 |
| 1  | 2.227703  | -1.234383 | -2.187036 |
| 1  | -0.76848  | -4.307939 | -2.085306 |
| 1  | 1.547406  | -3.558943 | -2.700494 |
| 8  | 0.848252  | 0.629456  | -1.121302 |
| 6  | 1.118783  | 1.334579  | -2.386573 |
| 1  | 0.353986  | 1.071207  | -3.114749 |
| 1  | 1.092448  | 2.398101  | -2.156425 |
| 1  | 2.103992  | 1.052492  | -2.76317  |
| 5  | -4.056795 | -1.073842 | -0.341276 |
| 1  | -4.318111 | -0.819414 | -1.497479 |
| 1  | -3.977171 | -2.261043 | -0.136711 |
| 1  | -4.829182 | -0.554285 | 0.432632  |
| 6  | -1.424028 | 2.573833  | 0.134102  |
| 1  | -1.589472 | 3.58347   | -0.260081 |
| 1  | -1.48721  | 2.638244  | 1.223369  |
| 1  | -0.416078 | 2.270822  | -0.139974 |

|   |           |           |           |
|---|-----------|-----------|-----------|
| 6 | -2.474337 | 1.690719  | -1.994674 |
| 1 | -3.272677 | 1.082603  | -2.427122 |
| 1 | -2.62954  | 2.728702  | -2.311238 |
| 1 | -1.527778 | 1.354527  | -2.415512 |
| 6 | -3.883889 | 2.149898  | 0.004641  |
| 1 | -3.973672 | 3.193048  | -0.321125 |
| 1 | -4.698465 | 1.581253  | -0.444681 |
| 1 | -4.008942 | 2.132472  | 1.088516  |
| 6 | -2.850521 | 0.338372  | 2.781726  |
| 1 | -3.897229 | 0.138321  | 2.539782  |
| 1 | -2.685375 | 0.043524  | 3.82473   |
| 1 | -2.67282  | 1.414812  | 2.718192  |
| 6 | -0.431518 | -0.107409 | 2.24782   |
| 1 | -0.191922 | 0.938086  | 2.03618   |
| 1 | -0.284102 | -0.260773 | 3.323613  |
| 1 | 0.281214  | -0.758469 | 1.735254  |
| 6 | -2.080901 | -1.974995 | 2.19273   |
| 1 | -1.822157 | -2.153455 | 3.242996  |
| 1 | -3.114121 | -2.290353 | 2.036406  |
| 1 | -1.427771 | -2.604582 | 1.581376  |

**P11b-i 2**

E = -1029.943131      ZPVE = 0.401144      NIMAG = 0.

|    |           |           |           |
|----|-----------|-----------|-----------|
| 15 | 0.832183  | -0.499746 | 0.427315  |
| 6  | 1.484905  | 1.218233  | 1.003886  |
| 6  | 1.412968  | -0.991711 | -1.330365 |
| 6  | -1.026623 | -0.501789 | 0.403308  |
| 6  | -1.86443  | 0.447732  | -0.234773 |

|   |           |           |           |
|---|-----------|-----------|-----------|
| 6 | -1.653    | -1.564407 | 1.077393  |
| 6 | -3.259441 | 0.304518  | -0.202656 |
| 6 | -3.041842 | -1.710102 | 1.115236  |
| 1 | -1.033849 | -2.295325 | 1.581797  |
| 6 | -3.842935 | -0.772041 | 0.468127  |
| 1 | -3.895139 | 1.030662  | -0.693433 |
| 1 | -3.483916 | -2.547394 | 1.645697  |
| 1 | -4.924983 | -0.865101 | 0.482706  |
| 8 | -1.2565   | 1.496094  | -0.855387 |
| 6 | -2.050902 | 2.465027  | -1.543912 |
| 1 | -2.73233  | 2.979036  | -0.857654 |
| 1 | -1.343286 | 3.183417  | -1.958462 |
| 1 | -2.620363 | 2.002558  | -2.357243 |
| 5 | 1.447145  | -1.854356 | 1.725768  |
| 1 | 1.097297  | -1.458631 | 2.819338  |
| 1 | 0.940898  | -2.916551 | 1.443826  |
| 1 | 2.652481  | -1.898743 | 1.621056  |
| 6 | 1.673982  | 2.272401  | -0.104391 |
| 1 | 1.998008  | 3.207995  | 0.368468  |
| 1 | 2.453128  | 1.98673   | -0.815854 |
| 1 | 0.752961  | 2.468689  | -0.649339 |
| 6 | 0.488116  | 1.750684  | 2.05696   |
| 1 | 0.305264  | 1.02122   | 2.851856  |
| 1 | 0.916353  | 2.647982  | 2.520013  |
| 1 | -0.469086 | 2.02783   | 1.609984  |
| 6 | 2.852551  | 1.004669  | 1.695434  |
| 1 | 3.21795   | 1.981901  | 2.033607  |
| 1 | 2.77478   | 0.348766  | 2.563432  |
| 1 | 3.602286  | 0.585999  | 1.019036  |
| 6 | 2.955548  | -0.943233 | -1.38523  |

|   |           |           |           |
|---|-----------|-----------|-----------|
| 1 | 3.412003  | -1.540724 | -0.592106 |
| 1 | 3.282435  | -1.35525  | -2.347593 |
| 1 | 3.343681  | 0.076524  | -1.319754 |
| 6 | 0.827839  | -0.131707 | -2.466538 |
| 1 | 1.099743  | 0.921137  | -2.385568 |
| 1 | 1.222282  | -0.509034 | -3.418353 |
| 1 | -0.261312 | -0.200344 | -2.506946 |
| 6 | 0.95723   | -2.452941 | -1.549745 |
| 1 | 1.260938  | -2.763312 | -2.556761 |
| 1 | 1.411888  | -3.136556 | -0.830113 |
| 1 | -0.130377 | -2.55627  | -1.483508 |

**R1<sub>III</sub> + b S<sub>N</sub>2@P-b pathway 2 in THF**

**RC<sub>IIIb-i</sub> 2**

E = -4409.703025      ZPVE = 0.339289      NIMAG = 0.

|    |           |           |           |
|----|-----------|-----------|-----------|
| 17 | 5.131973  | 0.574851  | 1.791052  |
| 15 | 3.131582  | 0.073645  | 1.414463  |
| 12 | -2.870833 | -0.539433 | -0.918498 |
| 35 | -0.826347 | 0.138479  | -2.094464 |
| 6  | -4.559438 | -1.219693 | 0.177425  |
| 6  | -4.952527 | 0.071168  | 0.557372  |
| 6  | -5.387693 | -2.256002 | 0.62455   |
| 6  | -6.073408 | 0.380366  | 1.32409   |
| 6  | -6.532996 | -2.005647 | 1.402718  |
| 1  | -5.152267 | -3.288797 | 0.370963  |
| 6  | -6.870396 | -0.69541  | 1.748312  |
| 1  | -6.337343 | 1.397845  | 1.593183  |
| 1  | -7.157741 | -2.830286 | 1.736433  |
| 1  | -7.753935 | -0.49771  | 2.348836  |

|   |           |           |           |
|---|-----------|-----------|-----------|
| 8 | -4.052353 | 1.037465  | 0.05297   |
| 6 | -4.286055 | 2.433268  | 0.268129  |
| 1 | -4.275658 | 2.662996  | 1.338234  |
| 1 | -3.47061  | 2.956682  | -0.230321 |
| 1 | -5.243635 | 2.733339  | -0.169469 |
| 5 | 2.189747  | -0.26634  | 3.072002  |
| 1 | 2.771444  | -1.201026 | 3.57122   |
| 1 | 2.227156  | 0.751774  | 3.722086  |
| 1 | 1.078154  | -0.555862 | 2.677054  |
| 6 | 2.519602  | 1.463938  | 0.412958  |
| 6 | 1.488399  | 2.262648  | 0.931043  |
| 6 | 3.071169  | 1.760596  | -0.845507 |
| 6 | 1.010437  | 3.347681  | 0.191132  |
| 1 | 1.064571  | 2.041363  | 1.904577  |
| 6 | 2.591807  | 2.845858  | -1.576636 |
| 1 | 3.869677  | 1.14831   | -1.252878 |
| 6 | 1.560799  | 3.639072  | -1.058942 |
| 1 | 0.211369  | 3.962246  | 0.593629  |
| 1 | 3.017552  | 3.070637  | -2.549507 |
| 1 | 1.186664  | 4.481442  | -1.633164 |
| 6 | 3.255245  | -1.362827 | 0.293226  |
| 6 | 2.256602  | -1.541485 | -0.677635 |
| 6 | 4.237829  | -2.34952  | 0.472637  |
| 6 | 2.254882  | -2.69002  | -1.4724   |
| 1 | 1.48317   | -0.796997 | -0.833344 |
| 6 | 4.2329    | -3.49128  | -0.330941 |
| 1 | 5.011174  | -2.226176 | 1.223582  |
| 6 | 3.243616  | -3.662511 | -1.30502  |
| 1 | 1.482933  | -2.813878 | -2.225855 |
| 1 | 5.002373  | -4.245055 | -0.195019 |

|   |          |           |           |
|---|----------|-----------|-----------|
| 1 | 3.245296 | -4.550754 | -1.929701 |
|---|----------|-----------|-----------|

**TS<sub>IIIb-i</sub> 2**

E = -4409.658627    ZPVE = 0.341320    NIMAG = 1.

|    |           |           |           |
|----|-----------|-----------|-----------|
| 17 | 2.530253  | -2.063157 | -2.026433 |
| 15 | 1.266404  | -0.270231 | -1.099087 |
| 12 | -1.595712 | 0.171178  | 0.278759  |
| 35 | -2.732603 | -0.56325  | 2.290984  |
| 6  | 0.025566  | 1.663496  | -0.108264 |
| 6  | -1.003255 | 2.355322  | -0.7834   |
| 6  | 0.929143  | 2.49396   | 0.580039  |
| 6  | -1.125124 | 3.739724  | -0.851733 |
| 6  | 0.845579  | 3.890869  | 0.546042  |
| 1  | 1.74047   | 2.050741  | 1.146223  |
| 6  | -0.164366 | 4.512262  | -0.18967  |
| 1  | -1.937706 | 4.218675  | -1.38547  |
| 1  | 1.574622  | 4.488609  | 1.085059  |
| 1  | -0.228127 | 5.595274  | -0.23296  |
| 8  | -1.989803 | 1.484105  | -1.297709 |
| 6  | -3.143524 | 2.010141  | -1.982934 |
| 1  | -2.824247 | 2.569457  | -2.864829 |
| 1  | -3.729214 | 1.142533  | -2.283962 |
| 1  | -3.729094 | 2.646799  | -1.314184 |
| 5  | 1.519943  | 0.836232  | -2.770332 |
| 1  | 2.72308   | 0.86096   | -2.869643 |
| 1  | 0.994814  | 0.1352    | -3.603181 |
| 1  | 1.011765  | 1.910614  | -2.614608 |
| 6  | -0.129279 | -1.473637 | -0.916122 |

|   |           |           |           |
|---|-----------|-----------|-----------|
| 6 | -1.185651 | -1.405154 | -1.851906 |
| 6 | -0.102351 | -2.545838 | -0.000408 |
| 6 | -2.207116 | -2.363527 | -1.839308 |
| 1 | -1.187926 | -0.627162 | -2.607105 |
| 6 | -1.129978 | -3.488182 | 0.009222  |
| 1 | 0.724977  | -2.657624 | 0.689134  |
| 6 | -2.187246 | -3.396958 | -0.90089  |
| 1 | -3.005936 | -2.299974 | -2.571258 |
| 1 | -1.099828 | -4.299759 | 0.729009  |
| 1 | -2.98098  | -4.13679  | -0.888256 |
| 6 | 2.363379  | -0.242677 | 0.379309  |
| 6 | 1.962096  | -0.526685 | 1.694171  |
| 6 | 3.697625  | 0.129589  | 0.140434  |
| 6 | 2.887847  | -0.471452 | 2.740352  |
| 1 | 0.939235  | -0.778634 | 1.944107  |
| 6 | 4.612818  | 0.201202  | 1.191155  |
| 1 | 4.024671  | 0.358173  | -0.868143 |
| 6 | 4.213812  | -0.110028 | 2.494348  |
| 1 | 2.561191  | -0.70681  | 3.748685  |
| 1 | 5.638439  | 0.493047  | 0.987272  |
| 1 | 4.927961  | -0.065152 | 3.31094   |

**PC<sub>mb-i</sub> 2**

E = -4409.770832      ZPVE = 0.340491      NIMAG = 0.

|    |           |          |           |
|----|-----------|----------|-----------|
| 17 | -7.045562 | 0.707212 | 0.813116  |
| 15 | 2.4729    | -0.02772 | -0.353954 |
| 12 | -4.843347 | 0.3134   | 0.361602  |
| 35 | -2.44674  | 0.088185 | -0.019333 |

|   |           |           |           |
|---|-----------|-----------|-----------|
| 6 | 1.186706  | -0.763377 | -1.438978 |
| 6 | 0.855725  | -2.136297 | -1.343451 |
| 6 | 0.63488   | -0.014681 | -2.487829 |
| 6 | -0.038051 | -2.711194 | -2.257464 |
| 6 | -0.240656 | -0.588874 | -3.4118   |
| 1 | 0.893306  | 1.033297  | -2.5892   |
| 6 | -0.575303 | -1.936861 | -3.288449 |
| 1 | -0.302657 | -3.758485 | -2.182105 |
| 1 | -0.6505   | 0.012682  | -4.216465 |
| 1 | -1.259214 | -2.398406 | -3.994876 |
| 8 | 1.458865  | -2.833991 | -0.344479 |
| 6 | 1.152667  | -4.219769 | -0.175695 |
| 1 | 1.445724  | -4.798821 | -1.058205 |
| 1 | 1.736452  | -4.54552  | 0.684913  |
| 1 | 0.085812  | -4.363582 | 0.027567  |
| 5 | 4.277511  | -0.515743 | -0.928068 |
| 1 | 4.354171  | -0.103508 | -2.066373 |
| 1 | 5.060265  | 0.033451  | -0.182232 |
| 1 | 4.328585  | -1.722865 | -0.859318 |
| 6 | 2.10648   | -0.465535 | 1.395206  |
| 6 | 3.189727  | -0.650271 | 2.267398  |
| 6 | 0.798866  | -0.577686 | 1.890414  |
| 6 | 2.967513  | -0.939991 | 3.61731   |
| 1 | 4.205386  | -0.57492  | 1.893796  |
| 6 | 0.580741  | -0.868939 | 3.238322  |
| 1 | -0.054693 | -0.457243 | 1.232294  |
| 6 | 1.663322  | -1.049058 | 4.106001  |
| 1 | 3.814345  | -1.082772 | 4.28223   |
| 1 | -0.436495 | -0.95773  | 3.608968  |
| 1 | 1.490201  | -1.276234 | 5.153963  |



|   |           |          |           |
|---|-----------|----------|-----------|
| 6 | 2.190336  | 1.791423 | -0.423468 |
| 6 | 0.925107  | 2.362827 | -0.198906 |
| 6 | 3.290771  | 2.632284 | -0.646966 |
| 6 | 0.771392  | 3.750024 | -0.193866 |
| 1 | 0.05435   | 1.735192 | -0.036769 |
| 6 | 3.133122  | 4.022194 | -0.638838 |
| 1 | 4.270856  | 2.202709 | -0.822882 |
| 6 | 1.874763  | 4.583081 | -0.411559 |
| 1 | -0.211097 | 4.180011 | -0.022345 |
| 1 | 3.993894  | 4.661331 | -0.811776 |
| 1 | 1.751302  | 5.66216  | -0.405537 |

**R1<sub>IV</sub> + b S<sub>N</sub>2@P-b pathway 2 in THF**

**RC<sub>IVb-i</sub> 2**

E = -4217.960469      ZPVE = 0.286798      NIMAG = 0.

|    |              |              |              |
|----|--------------|--------------|--------------|
| 17 | -2.709310000 | -2.865548000 | 1.188960000  |
| 15 | -1.971158000 | -1.111437000 | 0.347009000  |
| 12 | 1.928106000  | -0.084751000 | 0.087854000  |
| 35 | 3.319315000  | -0.891758000 | -1.785070000 |
| 6  | -2.011755000 | 0.060917000  | 1.739552000  |
| 1  | -1.287315000 | -0.262446000 | 2.489579000  |
| 1  | -1.718225000 | 1.044951000  | 1.362861000  |
| 1  | -3.004783000 | 0.116805000  | 2.188416000  |
| 6  | -3.213859000 | -0.586048000 | -0.864066000 |
| 6  | -2.965945000 | -0.817951000 | -2.227928000 |
| 6  | -4.403823000 | 0.049525000  | -0.468038000 |
| 6  | -3.898697000 | -0.411249000 | -3.183983000 |
| 1  | -2.052387000 | -1.310463000 | -2.542826000 |
| 6  | -5.330139000 | 0.453033000  | -1.429335000 |

|   |              |              |              |
|---|--------------|--------------|--------------|
| 1 | -4.614929000 | 0.231683000  | 0.580356000  |
| 6 | -5.078388000 | 0.223651000  | -2.786459000 |
| 1 | -3.700726000 | -0.588584000 | -4.236272000 |
| 1 | -6.246499000 | 0.945257000  | -1.119231000 |
| 1 | -5.801378000 | 0.540531000  | -3.531875000 |
| 6 | 1.761868000  | 1.174333000  | 1.809261000  |
| 6 | 1.451653000  | 2.322768000  | 1.066028000  |
| 6 | 1.820852000  | 1.361283000  | 3.196766000  |
| 6 | 1.231539000  | 3.593650000  | 1.594221000  |
| 6 | 1.601345000  | 2.618454000  | 3.789826000  |
| 1 | 2.054549000  | 0.519534000  | 3.848243000  |
| 6 | 1.312804000  | 3.726827000  | 2.989979000  |
| 1 | 1.006951000  | 4.455213000  | 0.973428000  |
| 1 | 1.661691000  | 2.732319000  | 4.869480000  |
| 1 | 1.149953000  | 4.701409000  | 3.442028000  |
| 8 | 1.374534000  | 2.022467000  | -0.312614000 |
| 6 | 1.361644000  | 3.071744000  | -1.285840000 |
| 1 | 2.245178000  | 3.708585000  | -1.171004000 |
| 1 | 1.382913000  | 2.582580000  | -2.259528000 |
| 1 | 0.452059000  | 3.673798000  | -1.195131000 |
| 5 | -0.219891000 | -1.445409000 | -0.408481000 |
| 1 | 0.490019000  | -1.742937000 | 0.531867000  |
| 1 | 0.061636000  | -0.384294000 | -0.933339000 |
| 1 | -0.305375000 | -2.327281000 | -1.217290000 |

**TS<sub>IVb-i</sub> 2**

E = -4217.935038      ZPVE = 0.287917      NIMAG = 1.

17      -3.059473      -2.884671      -0.070246

|    |           |           |           |
|----|-----------|-----------|-----------|
| 15 | -1.280491 | -1.481997 | 0.371408  |
| 12 | 1.749148  | -0.859901 | -0.272825 |
| 35 | 4.180409  | -0.653293 | -0.210324 |
| 6  | -1.341307 | -1.856714 | 2.16623   |
| 1  | -1.694015 | -2.882478 | 2.269588  |
| 1  | -0.339416 | -1.769935 | 2.58378   |
| 1  | -2.026433 | -1.190669 | 2.692199  |
| 6  | -2.237047 | -0.046433 | -0.232764 |
| 6  | -2.259779 | 0.191919  | -1.614471 |
| 6  | -2.979545 | 0.771568  | 0.629061  |
| 6  | -3.008583 | 1.254002  | -2.126012 |
| 1  | -1.701487 | -0.445046 | -2.292657 |
| 6  | -3.730738 | 1.827493  | 0.109859  |
| 1  | -2.973581 | 0.603217  | 1.700443  |
| 6  | -3.744788 | 2.074194  | -1.266625 |
| 1  | -3.019965 | 1.433591  | -3.196847 |
| 1  | -4.301994 | 2.45871   | 0.78374   |
| 1  | -4.327743 | 2.898465  | -1.666162 |
| 6  | 0.347985  | 0.400878  | 0.973122  |
| 6  | 0.645991  | 1.400689  | 0.022318  |
| 6  | 0.203803  | 0.875214  | 2.290362  |
| 6  | 0.738548  | 2.7633    | 0.29668   |
| 6  | 0.295072  | 2.233593  | 2.618763  |
| 1  | 0.002875  | 0.182629  | 3.101868  |
| 6  | 0.540729  | 3.176319  | 1.618656  |
| 1  | 0.97238   | 3.489344  | -0.473374 |
| 1  | 0.172689  | 2.552418  | 3.649814  |
| 1  | 0.602715  | 4.23281   | 1.861845  |
| 8  | 0.945347  | 0.85832   | -1.2386   |
| 6  | 1.397136  | 1.708922  | -2.308091 |

|   |           |           |           |
|---|-----------|-----------|-----------|
| 1 | 2.328196  | 2.2116    | -2.03222  |
| 1 | 1.564299  | 1.050693  | -3.159956 |
| 1 | 0.624358  | 2.440873  | -2.554019 |
| 5 | 0.059003  | -2.474949 | -0.704393 |
| 1 | 0.950877  | -2.714862 | 0.099602  |
| 1 | 0.411471  | -1.746338 | -1.611349 |
| 1 | -0.393552 | -3.49305  | -1.129762 |

**PCIVb-i 2**

E = -4217.998239      ZPVE = 0.289688      NIMAG = 0.

|    |              |              |              |
|----|--------------|--------------|--------------|
| 17 | 4.543153000  | -2.969544000 | -1.677342000 |
| 15 | 1.176945000  | -0.014756000 | -0.786257000 |
| 12 | -1.962456000 | -1.374367000 | 0.328237000  |
| 35 | -4.379367000 | -1.553465000 | 0.396222000  |
| 6  | 2.325995000  | -0.031545000 | -2.201643000 |
| 1  | 3.002672000  | -0.884316000 | -2.057106000 |
| 1  | 1.765086000  | -0.175396000 | -3.128923000 |
| 1  | 2.908508000  | 0.890966000  | -2.250125000 |
| 6  | 2.158732000  | 0.339147000  | 0.713118000  |
| 6  | 2.669368000  | -0.734347000 | 1.460265000  |
| 6  | 2.453686000  | 1.657535000  | 1.096170000  |
| 6  | 3.470198000  | -0.487802000 | 2.577780000  |
| 1  | 2.462125000  | -1.758080000 | 1.166629000  |
| 6  | 3.249150000  | 1.896821000  | 2.218848000  |
| 1  | 2.067136000  | 2.496859000  | 0.526216000  |
| 6  | 3.757299000  | 0.825515000  | 2.960128000  |
| 1  | 3.869090000  | -1.322578000 | 3.145380000  |
| 1  | 3.472011000  | 2.918320000  | 2.511406000  |

|   |              |              |              |
|---|--------------|--------------|--------------|
| 1 | 4.378183000  | 1.013983000  | 3.830686000  |
| 6 | 0.031857000  | 1.395991000  | -1.033795000 |
| 6 | -1.097158000 | 1.536771000  | -0.211774000 |
| 6 | 0.211175000  | 2.332176000  | -2.064056000 |
| 6 | -2.022334000 | 2.559296000  | -0.392382000 |
| 6 | -0.701125000 | 3.373257000  | -2.251255000 |
| 1 | 1.066398000  | 2.254490000  | -2.725463000 |
| 6 | -1.816276000 | 3.484688000  | -1.418947000 |
| 1 | -2.895074000 | 2.627024000  | 0.247609000  |
| 1 | -0.541339000 | 4.089707000  | -3.050121000 |
| 1 | -2.532894000 | 4.285839000  | -1.567334000 |
| 8 | -1.290849000 | 0.575033000  | 0.798452000  |
| 6 | -1.361451000 | 1.093570000  | 2.164833000  |
| 1 | -2.311554000 | 1.604660000  | 2.323855000  |
| 1 | -1.280267000 | 0.230608000  | 2.824482000  |
| 1 | -0.520101000 | 1.768096000  | 2.326655000  |
| 5 | 0.198713000  | -1.708572000 | -0.687035000 |
| 1 | -0.812610000 | -1.542065000 | -1.360601000 |
| 1 | -0.026137000 | -1.951005000 | 0.492848000  |
| 1 | 0.848252000  | -2.595592000 | -1.157174000 |

**R1v + b** S<sub>N</sub>2@P-b pathway 2 in THF

**RC<sub>v</sub>b-i 2**

E = -4026.214978      ZPVE = 0.231626      NIMAG = 0.

|    |           |           |           |
|----|-----------|-----------|-----------|
| 17 | -4.65609  | -2.523221 | 0.144773  |
| 15 | -3.888909 | -0.580693 | 0.092237  |
| 12 | 2.5948    | -0.182223 | -0.486769 |
| 35 | 4.127183  | -2.056827 | -0.212943 |

|   |           |           |           |
|---|-----------|-----------|-----------|
| 6 | -2.846407 | -0.520614 | 1.589543  |
| 1 | -3.479468 | -0.60288  | 2.475761  |
| 1 | -2.105173 | -1.322661 | 1.585567  |
| 1 | -2.339226 | 0.449138  | 1.604337  |
| 6 | -2.734471 | -0.641479 | -1.319577 |
| 1 | -2.209338 | 0.317909  | -1.368684 |
| 1 | -2.008799 | -1.448724 | -1.198165 |
| 1 | -3.299935 | -0.784841 | -2.242995 |
| 6 | 1.249112  | 1.380617  | -0.978909 |
| 6 | 1.237136  | 1.929057  | 0.311128  |
| 6 | 0.457596  | 2.044855  | -1.923849 |
| 6 | 0.512935  | 3.054244  | 0.699775  |
| 6 | -0.295584 | 3.18526   | -1.589339 |
| 1 | 0.415374  | 1.681424  | -2.949771 |
| 6 | -0.26602  | 3.683298  | -0.285022 |
| 1 | 0.53544   | 3.445546  | 1.711542  |
| 1 | -0.902267 | 3.680355  | -2.343235 |
| 1 | -0.845749 | 4.563542  | -0.021794 |
| 8 | 2.063354  | 1.185034  | 1.182896  |
| 6 | 2.254178  | 1.613357  | 2.536149  |
| 1 | 1.303599  | 1.60456   | 3.078877  |
| 1 | 2.94267   | 0.900539  | 2.989127  |
| 1 | 2.689107  | 2.617593  | 2.561977  |
| 5 | -5.265429 | 0.763802  | -0.010898 |
| 1 | -4.589113 | 1.775646  | -0.026358 |
| 1 | -5.863904 | 0.576538  | -1.044745 |
| 1 | -5.935596 | 0.656243  | 0.990041  |

E = -4026.170773      ZPVE = 0.234304      NIMAG = 1.

|    |           |           |           |
|----|-----------|-----------|-----------|
| 17 | -3.636435 | -2.480815 | 0.40548   |
| 15 | -2.024638 | -0.702943 | 0.061669  |
| 12 | 1.415263  | -0.223408 | -0.345584 |
| 35 | 3.52129   | -1.402194 | -0.398657 |
| 6  | -0.973773 | -1.466638 | 1.376981  |
| 1  | -1.646272 | -1.84521  | 2.147094  |
| 1  | -0.396904 | -2.311201 | 0.988641  |
| 1  | -0.316077 | -0.721851 | 1.824085  |
| 6  | -1.779409 | -1.467296 | -1.614554 |
| 1  | -1.090718 | -0.89368  | -2.23125  |
| 1  | -1.411992 | -2.486859 | -1.486569 |
| 1  | -2.755279 | -1.515106 | -2.099896 |
| 6  | -0.447543 | 0.98669   | -0.531314 |
| 6  | 0.168395  | 1.80892   | 0.441215  |
| 6  | -1.061674 | 1.697579  | -1.587831 |
| 6  | 0.117695  | 3.199912  | 0.461494  |
| 6  | -1.118897 | 3.091659  | -1.625565 |
| 1  | -1.554816 | 1.149805  | -2.386707 |
| 6  | -0.555757 | 3.837404  | -0.585869 |
| 1  | 0.596857  | 3.782837  | 1.239429  |
| 1  | -1.617064 | 3.595535  | -2.447946 |
| 1  | -0.617287 | 4.921391  | -0.594444 |
| 8  | 0.97468   | 1.062786  | 1.319758  |
| 6  | 1.749948  | 1.718355  | 2.345633  |
| 1  | 1.083185  | 2.228651  | 3.043626  |
| 1  | 2.29026   | 0.923412  | 2.857131  |
| 1  | 2.454509  | 2.424646  | 1.898514  |
| 5  | -3.349547 | 0.709452  | 0.582546  |

|   |           |          |           |
|---|-----------|----------|-----------|
| 1 | -2.74341  | 1.730163 | 0.784404  |
| 1 | -4.090455 | 0.760851 | -0.375587 |
| 1 | -3.867486 | 0.243266 | 1.569366  |

**PC<sub>v<sub>b</sub>-i</sub> 2**

E = -4026.231722    ZPVE = 0.235343    NIMAG = 0.

|    |           |           |           |
|----|-----------|-----------|-----------|
| 17 | 3.685585  | 4.096283  | -0.54661  |
| 15 | 2.31894   | -0.155666 | 0.340362  |
| 12 | -2.258878 | 0.254893  | 0.237613  |
| 35 | -4.270903 | 1.41957   | -0.357599 |
| 6  | 1.307318  | 1.363556  | 0.503918  |
| 1  | 2.012991  | 2.202422  | 0.527441  |
| 1  | 0.645193  | 1.513797  | -0.352511 |
| 1  | 0.738238  | 1.349832  | 1.434152  |
| 6  | 3.404824  | 0.205146  | -1.091183 |
| 1  | 2.836773  | 0.246501  | -2.023752 |
| 1  | 3.855333  | 1.185916  | -0.907535 |
| 1  | 4.197297  | -0.54161  | -1.169349 |
| 6  | 1.250442  | -1.55863  | -0.222383 |
| 6  | -0.070471 | -1.805266 | 0.181496  |
| 6  | 1.83538   | -2.530918 | -1.057174 |
| 6  | -0.781565 | -2.937165 | -0.213426 |
| 6  | 1.141089  | -3.671036 | -1.463586 |
| 1  | 2.856365  | -2.399121 | -1.396778 |
| 6  | -0.172701 | -3.879679 | -1.041689 |
| 1  | -1.800724 | -3.076006 | 0.135413  |
| 1  | 1.630648  | -4.394434 | -2.107235 |
| 1  | -0.7216   | -4.762842 | -1.351139 |



|   |           |           |          |
|---|-----------|-----------|----------|
| 8 | -0.759232 | -0.874938 | 1.007721 |
| 6 | -0.635768 | -1.136901 | 2.450693 |
| 1 | 0.421936  | -1.20401  | 2.703345 |
| 1 | -1.09264  | -0.291507 | 2.96531  |
| 1 | -1.156472 | -2.065774 | 2.687657 |
| 5 | 3.325165  | -0.610385 | 1.945288 |
| 1 | 2.521329  | -0.797531 | 2.834465 |
| 1 | 3.950659  | -1.609713 | 1.658437 |
| 1 | 4.03051   | 0.355378  | 2.145424 |

**R1 + b** SN2@P-f pathways 2, 3 and 4 in THF

**RC<sub>1b-r</sub> 2**

E = -4570.596661      ZPVE = 0.522097      NIMAG = 0.

|   |          |           |           |
|---|----------|-----------|-----------|
| 6 | 1.893058 | -0.843591 | -0.085527 |
| 6 | 3.953568 | -2.35958  | 0.059004  |
| 6 | 1.997631 | -3.045213 | -1.450486 |
| 6 | 1.124433 | -2.050201 | -0.672795 |
| 6 | 3.153806 | -3.519056 | -0.557046 |
| 6 | 3.826577 | -0.254635 | 1.601374  |
| 6 | 1.159566 | -4.219502 | -1.971403 |
| 6 | 2.929299 | 0.427144  | 2.650512  |
| 6 | 5.086292 | -0.791172 | 2.305402  |
| 1 | 1.183394 | -0.294832 | 0.539596  |
| 1 | 4.693319 | -2.779661 | 0.74601   |
| 1 | 4.514613 | -1.837615 | -0.7238   |
| 1 | 2.42775  | -2.526918 | -2.319091 |
| 1 | 0.288129 | -1.710163 | -1.289314 |
| 1 | 0.677112 | -2.565081 | 0.188754  |

|    |          |           |           |
|----|----------|-----------|-----------|
| 1  | 3.828545 | -4.167069 | -1.130959 |
| 1  | 2.73833  | -4.140031 | 0.251573  |
| 1  | 4.164148 | 0.509018  | 0.88724   |
| 1  | 0.354819 | -3.872864 | -2.630026 |
| 1  | 1.778016 | -4.924209 | -2.538769 |
| 1  | 0.699895 | -4.770488 | -1.140933 |
| 1  | 2.66349  | -0.286755 | 3.44026   |
| 1  | 3.459073 | 1.263019  | 3.120344  |
| 1  | 1.998753 | 0.818456  | 2.234688  |
| 1  | 4.841079 | -1.63671  | 2.960892  |
| 1  | 5.527888 | -0.006678 | 2.929541  |
| 1  | 5.853629 | -1.119605 | 1.599328  |
| 6  | 2.232765 | 2.077704  | -0.581995 |
| 6  | 3.239474 | 3.036697  | -0.777518 |
| 6  | 1.091288 | 2.415506  | 0.165759  |
| 6  | 3.110425 | 4.313102  | -0.222858 |
| 1  | 4.119928 | 2.788613  | -1.35955  |
| 6  | 0.965174 | 3.6929    | 0.711213  |
| 1  | 0.30395  | 1.688044  | 0.339116  |
| 6  | 1.973498 | 4.643793  | 0.518109  |
| 1  | 3.896406 | 5.046365  | -0.375485 |
| 1  | 0.081628 | 3.94441   | 1.290012  |
| 1  | 1.87187  | 5.636982  | 0.945233  |
| 17 | 0.805059 | 0.459055  | -2.717735 |
| 6  | 3.057015 | -1.363178 | 0.825389  |
| 1  | 2.528199 | -1.951151 | 1.593693  |
| 15 | 2.421611 | 0.435433  | -1.366998 |
| 5  | 4.055232 | 0.268678  | -2.415945 |
| 1  | 4.013932 | 1.203928  | -3.182393 |
| 1  | 4.953896 | 0.355038  | -1.607716 |

|    |           |           |           |
|----|-----------|-----------|-----------|
| 1  | 4.004616  | -0.806573 | -2.961029 |
| 6  | -6.719829 | -0.663395 | 0.9289    |
| 6  | -7.69996  | -0.33246  | -0.024729 |
| 6  | -7.328474 | 0.283905  | -1.221335 |
| 6  | -5.980241 | 0.577331  | -1.483058 |
| 6  | -5.053719 | 0.227505  | -0.502966 |
| 6  | -5.36294  | -0.393022 | 0.715475  |
| 1  | -7.040316 | -1.142031 | 1.853287  |
| 1  | -8.746653 | -0.554239 | 0.167272  |
| 1  | -8.081223 | 0.541649  | -1.961088 |
| 1  | -5.695896 | 1.056279  | -2.414107 |
| 12 | -3.357142 | -0.449749 | 1.407098  |
| 35 | -1.048368 | -0.557178 | 2.242895  |
| 8  | -3.66418  | 0.448754  | -0.618457 |
| 6  | -3.13668  | 1.133154  | -1.760759 |
| 1  | -3.331971 | 0.562679  | -2.674298 |
| 1  | -3.574457 | 2.133204  | -1.843841 |
| 1  | -2.062369 | 1.21193   | -1.599073 |

**TS<sub>lb-r</sub> 2**

E = -4570.487821    ZPVE = 0.522492    NIMAG = 1.

|   |          |           |           |
|---|----------|-----------|-----------|
| 6 | 1.721193 | -0.146742 | -0.651161 |
| 6 | 4.25914  | -0.502524 | -0.334264 |
| 6 | 3.43291  | 1.797859  | -1.034111 |
| 6 | 2.075007 | 1.168794  | -1.392043 |
| 6 | 4.56242  | 0.767373  | -1.140614 |
| 6 | 2.674724 | -2.615441 | -0.3209   |
| 6 | 3.695992 | 3.030205  | -1.90922  |

|   |           |           |           |
|---|-----------|-----------|-----------|
| 6 | 2.017048  | -3.424143 | -1.456132 |
| 6 | 3.926788  | -3.367764 | 0.162674  |
| 1 | 0.878603  | -0.577983 | -1.198782 |
| 1 | 5.075122  | -1.21507  | -0.483623 |
| 1 | 4.23034   | -0.273155 | 0.735566  |
| 1 | 3.382396  | 2.131502  | 0.007312  |
| 1 | 1.276009  | 1.898012  | -1.257421 |
| 1 | 2.088259  | 0.908421  | -2.461855 |
| 1 | 5.504417  | 1.213553  | -0.796138 |
| 1 | 4.712683  | 0.495081  | -2.19753  |
| 1 | 1.989281  | -2.599324 | 0.53084   |
| 1 | 2.910246  | 3.78361   | -1.781057 |
| 1 | 4.653188  | 3.498149  | -1.651452 |
| 1 | 3.732634  | 2.759331  | -2.972846 |
| 1 | 2.737478  | -3.590222 | -2.266755 |
| 1 | 1.679993  | -4.404149 | -1.100704 |
| 1 | 1.151962  | -2.91496  | -1.893238 |
| 1 | 4.680188  | -3.457867 | -0.629039 |
| 1 | 3.647229  | -4.383025 | 0.465971  |
| 1 | 4.392427  | -2.88105  | 1.024067  |
| 6 | -0.164629 | -1.400224 | 1.313332  |
| 6 | -0.522268 | -1.762228 | 2.622705  |
| 6 | -0.709312 | -2.162178 | 0.25481   |
| 6 | -1.399822 | -2.826127 | 2.866236  |
| 1 | -0.102803 | -1.220939 | 3.462156  |
| 6 | -1.584271 | -3.22918  | 0.499295  |
| 1 | -0.381525 | -2.010466 | -0.769333 |
| 6 | -1.942473 | -3.55852  | 1.810313  |
| 1 | -1.654842 | -3.077628 | 3.891468  |
| 1 | -1.965603 | -3.804755 | -0.337908 |

|    |           |           |           |
|----|-----------|-----------|-----------|
| 1  | -2.620989 | -4.383528 | 2.001624  |
| 17 | 1.259163  | 2.549807  | 1.461724  |
| 6  | 2.93672   | -1.146967 | -0.794289 |
| 1  | 3.02762   | -1.212557 | -1.891303 |
| 15 | 1.017032  | 0.058043  | 1.116534  |
| 5  | 2.23296   | -0.193928 | 2.661621  |
| 1  | 1.614015  | 0.065605  | 3.668489  |
| 1  | 2.469     | -1.384152 | 2.570554  |
| 1  | 3.17239   | 0.535624  | 2.49343   |
| 6  | -1.935275 | 1.247446  | 2.093714  |
| 6  | -2.607515 | 2.353918  | 2.617515  |
| 6  | -2.747517 | 3.496461  | 1.825861  |
| 6  | -2.237806 | 3.537124  | 0.524215  |
| 6  | -1.555855 | 2.420908  | 0.023693  |
| 6  | -1.391895 | 1.234055  | 0.791865  |
| 1  | -1.832504 | 0.365237  | 2.720511  |
| 1  | -3.012575 | 2.327786  | 3.624373  |
| 1  | -3.260418 | 4.370474  | 2.217489  |
| 1  | -2.370798 | 4.431995  | -0.072215 |
| 12 | -2.249391 | -0.290789 | -0.468012 |
| 35 | -3.655344 | -1.30375  | -2.153436 |
| 8  | -1.061705 | 2.359531  | -1.248928 |
| 6  | -1.236293 | 3.480073  | -2.123888 |
| 1  | -2.299161 | 3.690847  | -2.284397 |
| 1  | -0.73489  | 4.367906  | -1.725804 |
| 1  | -0.774093 | 3.191376  | -3.067677 |

**PC<sub>1b-r</sub> 2**

E = -4570.590460    ZPVE = 0.525702    NIMAG = 0.

|   |           |           |           |
|---|-----------|-----------|-----------|
| 6 | -2.220473 | 0.652278  | 0.618122  |
| 6 | -4.498513 | 0.862828  | -0.550063 |
| 6 | -2.860873 | 2.829396  | -0.64581  |
| 6 | -2.10579  | 2.194234  | 0.531592  |
| 6 | -4.33127  | 2.388953  | -0.611229 |
| 6 | -3.970782 | -1.295954 | 0.831317  |
| 6 | -2.720271 | 4.35674   | -0.623208 |
| 6 | -3.594551 | -1.734166 | 2.25853   |
| 6 | -5.422917 | -1.721827 | 0.548745  |
| 1 | -1.766081 | 0.350315  | 1.56484   |
| 1 | -5.56314  | 0.637734  | -0.441692 |
| 1 | -4.178874 | 0.415171  | -1.496229 |
| 1 | -2.418005 | 2.463789  | -1.583691 |
| 1 | -1.060227 | 2.510151  | 0.527575  |
| 1 | -2.531302 | 2.582841  | 1.468086  |
| 1 | -4.859799 | 2.782469  | -1.488599 |
| 1 | -4.810759 | 2.840981  | 0.270612  |
| 1 | -3.340003 | -1.849238 | 0.123202  |
| 1 | -1.669294 | 4.662655  | -0.676252 |
| 1 | -3.246909 | 4.812353  | -1.46912  |
| 1 | -3.144267 | 4.774189  | 0.298797  |
| 1 | -4.263551 | -1.263007 | 2.989334  |
| 1 | -3.692501 | -2.819546 | 2.367934  |
| 1 | -2.568841 | -1.47184  | 2.530131  |
| 1 | -6.131177 | -1.155029 | 1.166105  |
| 1 | -5.551624 | -2.782872 | 0.788673  |
| 1 | -5.70122  | -1.585399 | -0.499626 |
| 6 | -0.503336 | -1.799591 | 0.074239  |
| 6 | -0.481225 | -2.966348 | -0.72516  |

|    |           |           |           |
|----|-----------|-----------|-----------|
| 6  | -0.060889 | -1.899602 | 1.412261  |
| 6  | -0.006579 | -4.179905 | -0.211706 |
| 1  | -0.87336  | -2.933886 | -1.73611  |
| 6  | 0.398905  | -3.114484 | 1.918472  |
| 1  | -0.064892 | -1.029244 | 2.053507  |
| 6  | 0.431017  | -4.255669 | 1.109977  |
| 1  | 0.00285   | -5.059746 | -0.846858 |
| 1  | 0.737869  | -3.167963 | 2.948072  |
| 1  | 0.795208  | -5.196296 | 1.510795  |
| 17 | 4.600488  | 3.936714  | 1.992353  |
| 6  | -3.728935 | 0.23009   | 0.629523  |
| 1  | -4.115886 | 0.71782   | 1.5399    |
| 15 | -1.160987 | -0.22888  | -0.681181 |
| 5  | -1.918786 | -0.650314 | -2.44678  |
| 1  | -1.004387 | -1.153925 | -3.071247 |
| 1  | -2.821399 | -1.427858 | -2.256978 |
| 1  | -2.273599 | 0.393983  | -2.935455 |
| 6  | 0.673543  | 1.184034  | -2.293749 |
| 6  | 1.739343  | 2.032037  | -2.580388 |
| 6  | 2.533402  | 2.511529  | -1.532028 |
| 6  | 2.270571  | 2.166934  | -0.207392 |
| 6  | 1.193242  | 1.317341  | 0.090568  |
| 6  | 0.396319  | 0.759597  | -0.96143  |
| 1  | 0.031186  | 0.836096  | -3.093999 |
| 1  | 1.935694  | 2.328333  | -3.604896 |
| 1  | 3.364297  | 3.178652  | -1.739097 |
| 1  | 2.896762  | 2.581574  | 0.580062  |
| 12 | 1.760907  | -1.304333 | -1.362781 |
| 35 | 3.854681  | -2.147493 | -0.545326 |
| 8  | 0.840755  | 0.983987  | 1.347177  |

|   |          |          |          |
|---|----------|----------|----------|
| 6 | 1.622419 | 1.476399 | 2.458086 |
| 1 | 2.654147 | 1.125521 | 2.387655 |
| 1 | 1.605408 | 2.56768  | 2.486429 |
| 1 | 1.143196 | 1.067473 | 3.34649  |

**RC<sub>1b-r</sub> 3**

E = -4570.592975      ZPVE = 0.522819      NIMAG = 0.

|   |           |           |           |
|---|-----------|-----------|-----------|
| 6 | 2.31583   | -0.654995 | 1.311608  |
| 6 | 1.95214   | -2.877909 | 0.080134  |
| 6 | 0.403541  | -2.255013 | 2.027064  |
| 6 | 1.457321  | -1.226485 | 2.466317  |
| 6 | 1.085498  | -3.386152 | 1.243507  |
| 6 | 3.993789  | -1.390713 | -0.58381  |
| 6 | -0.379967 | -2.786143 | 3.233721  |
| 6 | 5.20554   | -0.650945 | 0.012395  |
| 6 | 4.501834  | -2.57564  | -1.425958 |
| 1 | 3.099813  | -0.038213 | 1.76343   |
| 1 | 2.47292   | -3.733579 | -0.357685 |
| 1 | 1.314952  | -2.468399 | -0.710705 |
| 1 | -0.312217 | -1.759909 | 1.356421  |
| 1 | 0.994028  | -0.419728 | 3.039668  |
| 1 | 2.163642  | -1.719479 | 3.149561  |
| 1 | 0.330505  | -4.083295 | 0.860075  |
| 1 | 1.717634  | -3.959528 | 1.938622  |
| 1 | 3.480477  | -0.708759 | -1.275373 |
| 1 | -0.890952 | -1.975077 | 3.764945  |
| 1 | -1.13634  | -3.514288 | 2.920474  |
| 1 | 0.289551  | -3.284675 | 3.945914  |



|    |           |           |           |
|----|-----------|-----------|-----------|
| 1  | 5.772531  | -1.320186 | 0.671757  |
| 1  | 5.88012   | -0.317395 | -0.78309  |
| 1  | 4.92702   | 0.23308   | 0.591163  |
| 1  | 4.948045  | -3.350293 | -0.78936  |
| 1  | 5.275673  | -2.232435 | -2.120807 |
| 1  | 3.709399  | -3.038571 | -2.019631 |
| 6  | 2.583859  | 1.872171  | -0.289177 |
| 6  | 2.705136  | 2.18083   | -1.653244 |
| 6  | 3.353585  | 2.574425  | 0.654456  |
| 6  | 3.600473  | 3.170326  | -2.067958 |
| 1  | 2.106538  | 1.656475  | -2.389787 |
| 6  | 4.239516  | 3.565551  | 0.234541  |
| 1  | 3.255467  | 2.364774  | 1.715534  |
| 6  | 4.367472  | 3.861496  | -1.127502 |
| 1  | 3.691867  | 3.400849  | -3.124705 |
| 1  | 4.827942  | 4.106701  | 0.968871  |
| 1  | 5.059349  | 4.632884  | -1.451696 |
| 17 | 0.191145  | 1.62868   | 1.572746  |
| 6  | 2.995283  | -1.830735 | 0.526046  |
| 1  | 3.608734  | -2.319038 | 1.301221  |
| 15 | 1.396399  | 0.58731   | 0.225333  |
| 5  | 0.277232  | -0.01478  | -1.2473   |
| 1  | -0.311914 | 0.966424  | -1.641929 |
| 1  | 1.000526  | -0.494971 | -2.079641 |
| 1  | -0.439824 | -0.86873  | -0.773542 |
| 6  | -3.85935  | 1.141397  | 0.530652  |
| 6  | -4.657745 | 1.830031  | 1.441714  |
| 6  | -4.976988 | 3.161251  | 1.129145  |
| 6  | -4.500136 | 3.744669  | -0.047568 |
| 6  | -3.701691 | 2.995092  | -0.930722 |

|    |           |           |           |
|----|-----------|-----------|-----------|
| 6  | -3.365963 | 1.658913  | -0.67444  |
| 1  | -5.022581 | 1.378573  | 2.358966  |
| 1  | -5.598327 | 3.734303  | 1.811999  |
| 1  | -4.751235 | 4.777074  | -0.278708 |
| 12 | -2.401438 | -0.163039 | -1.238944 |
| 35 | -2.739329 | -2.418967 | -2.208145 |
| 8  | -3.42227  | -0.190806 | 0.725054  |
| 6  | -4.115674 | -1.048959 | 1.63814   |
| 1  | -5.183481 | -1.078553 | 1.39656   |
| 1  | -3.681079 | -2.040557 | 1.513238  |
| 1  | -3.975    | -0.712993 | 2.669991  |
| 1  | -3.353283 | 3.476189  | -1.844355 |

### TS<sub>lb-r</sub> 3

E = -4570.519620    ZPVE = 0.524236    NIMAG = 1.

|   |           |           |           |
|---|-----------|-----------|-----------|
| 6 | 1.654093  | -1.133758 | 1.084065  |
| 6 | 1.539133  | -3.319801 | -0.315974 |
| 6 | -0.29168  | -2.844543 | 1.420391  |
| 6 | 0.635606  | -1.794294 | 2.050642  |
| 6 | 0.53179   | -3.909659 | 0.682528  |
| 6 | 3.619039  | -1.740148 | -0.570566 |
| 6 | -1.196282 | -3.477726 | 2.486037  |
| 6 | 4.781546  | -1.221372 | 0.296104  |
| 6 | 4.161744  | -2.802065 | -1.543763 |
| 1 | 2.357901  | -0.577483 | 1.706689  |
| 1 | 2.164393  | -4.136027 | -0.689486 |
| 1 | 1.017049  | -2.913635 | -1.185336 |
| 1 | -0.942838 | -2.339995 | 0.694106  |

|    |           |           |           |
|----|-----------|-----------|-----------|
| 1  | 0.048202  | -1.028078 | 2.558985  |
| 1  | 1.235341  | -2.290971 | 2.827987  |
| 1  | -0.13645  | -4.608602 | 0.163299  |
| 1  | 1.078405  | -4.50141  | 1.433054  |
| 1  | 3.254814  | -0.90955  | -1.185213 |
| 1  | -1.790975 | -2.719607 | 3.007223  |
| 1  | -1.887847 | -4.20023  | 2.037938  |
| 1  | -0.59907  | -4.008016 | 3.238628  |
| 1  | 5.239163  | -2.050374 | 0.85103   |
| 1  | 5.559027  | -0.765972 | -0.326706 |
| 1  | 4.465035  | -0.469801 | 1.024021  |
| 1  | 4.504997  | -3.697702 | -1.010695 |
| 1  | 5.019866  | -2.396352 | -2.09107  |
| 1  | 3.416171  | -3.110858 | -2.281906 |
| 6  | 2.178704  | 1.479225  | -0.475841 |
| 6  | 2.195293  | 1.902128  | -1.818759 |
| 6  | 3.179498  | 1.958191  | 0.390487  |
| 6  | 3.18892   | 2.767014  | -2.283336 |
| 1  | 1.443501  | 1.55157   | -2.514021 |
| 6  | 4.178716  | 2.808436  | -0.079551 |
| 1  | 3.170112  | 1.680456  | 1.436665  |
| 6  | 4.18559   | 3.219635  | -1.41703  |
| 1  | 3.180259  | 3.081489  | -3.322495 |
| 1  | 4.947476  | 3.157683  | 0.603084  |
| 1  | 4.959252  | 3.891171  | -1.777329 |
| 17 | 0.674716  | 1.471383  | 2.243968  |
| 6  | 2.45181   | -2.253819 | 0.327039  |
| 1  | 2.94155   | -2.773609 | 1.169363  |
| 15 | 0.879128  | 0.284291  | 0.041312  |
| 5  | 0.191151  | -0.482992 | -1.668179 |

|    |           |           |           |
|----|-----------|-----------|-----------|
| 1  | -0.360219 | 0.40279   | -2.295875 |
| 1  | 1.091379  | -0.969712 | -2.29919  |
| 1  | -0.583224 | -1.361058 | -1.323337 |
| 6  | -2.330429 | 1.486204  | 1.204996  |
| 6  | -2.91958  | 2.662909  | 1.685169  |
| 6  | -2.640984 | 3.87395   | 1.041692  |
| 6  | -1.799775 | 3.921916  | -0.073556 |
| 6  | -1.227105 | 2.734762  | -0.540339 |
| 6  | -1.474783 | 1.493584  | 0.075127  |
| 1  | -3.581617 | 2.655952  | 2.543202  |
| 1  | -3.088317 | 4.787302  | 1.42396   |
| 1  | -1.595674 | 4.866219  | -0.569367 |
| 12 | -2.11944  | -0.105578 | -1.245456 |
| 35 | -4.046814 | -1.162016 | -2.295599 |
| 8  | -2.562055 | 0.252937  | 1.746386  |
| 6  | -3.43922  | 0.145034  | 2.872059  |
| 1  | -4.444775 | 0.501779  | 2.62367   |
| 1  | -3.479937 | -0.916186 | 3.115881  |
| 1  | -3.047125 | 0.703651  | 3.72853   |
| 1  | -0.570328 | 2.781437  | -1.406912 |

**PC<sub>1b-r</sub> 3**

E = -4570.625354    ZPVE = 0.527332    NIMAG = 0.

|   |           |          |          |
|---|-----------|----------|----------|
| 6 | -1.460912 | 1.095405 | 0.67562  |
| 6 | -0.426135 | 3.321606 | -0.08668 |
| 6 | 0.479283  | 2.194805 | 2.021744 |
| 6 | -0.783556 | 1.319056 | 2.049721 |
| 6 | 0.187701  | 3.521177 | 1.30607  |

|   |           |           |           |
|---|-----------|-----------|-----------|
| 6 | -2.49971  | 2.37016   | -1.377836 |
| 6 | 1.016044  | 2.425976  | 3.440295  |
| 6 | -3.990311 | 2.093443  | -1.109942 |
| 6 | -2.374506 | 3.623241  | -2.262853 |
| 1 | -2.430179 | 0.633018  | 0.895735  |
| 1 | -0.665623 | 4.303823  | -0.50327  |
| 1 | 0.311778  | 2.874865  | -0.762224 |
| 1 | 1.253215  | 1.670787  | 1.443729  |
| 1 | -0.576829 | 0.361016  | 2.537071  |
| 1 | -1.537261 | 1.813187  | 2.677575  |
| 1 | 1.109518  | 4.111499  | 1.226306  |
| 1 | -0.507867 | 4.109158  | 1.923297  |
| 1 | -2.097702 | 1.534618  | -1.964966 |
| 1 | 1.23722   | 1.480611  | 3.948836  |
| 1 | 1.934215  | 3.024     | 3.422507  |
| 1 | 0.278831  | 2.962521  | 4.049825  |
| 1 | -4.458873 | 2.97444   | -0.653741 |
| 1 | -4.520422 | 1.878577  | -2.044202 |
| 1 | -4.152004 | 1.251167  | -0.433099 |
| 1 | -2.708147 | 4.5233    | -1.731705 |
| 1 | -3.007536 | 3.511764  | -3.150004 |
| 1 | -1.349876 | 3.790429  | -2.607469 |
| 6 | -1.901487 | -1.122038 | -1.332379 |
| 6 | -1.574241 | -1.617855 | -2.607556 |
| 6 | -3.192909 | -1.343761 | -0.823831 |
| 6 | -2.521763 | -2.31201  | -3.361952 |
| 1 | -0.588112 | -1.459708 | -3.026445 |
| 6 | -4.134896 | -2.042157 | -1.584468 |
| 1 | -3.490616 | -0.991183 | 0.161781  |
| 6 | -3.805857 | -2.524935 | -2.853021 |

|    |           |           |           |
|----|-----------|-----------|-----------|
| 1  | -2.254202 | -2.681114 | -4.347493 |
| 1  | -5.128093 | -2.202712 | -1.176489 |
| 1  | -4.543576 | -3.061951 | -3.441775 |
| 17 | -4.509926 | -0.405269 | 2.471     |
| 6  | -1.710688 | 2.468604  | -0.036118 |
| 1  | -2.381425 | 2.988795  | 0.666703  |
| 15 | -0.608182 | -0.233375 | -0.368286 |
| 5  | 0.754509  | 0.315227  | -1.661327 |
| 1  | 1.256406  | -0.757644 | -2.006016 |
| 1  | 0.255346  | 0.838888  | -2.612797 |
| 1  | 1.540587  | 1.074783  | -1.133115 |
| 6  | 1.412709  | -1.619569 | 1.192725  |
| 6  | 1.865623  | -2.678987 | 1.980047  |
| 6  | 0.976898  | -3.668018 | 2.400146  |
| 6  | -0.363137 | -3.59845  | 2.023358  |
| 6  | -0.798331 | -2.551459 | 1.213055  |
| 6  | 0.069802  | -1.535528 | 0.770765  |
| 1  | 2.908373  | -2.734122 | 2.268884  |
| 1  | 1.338134  | -4.485413 | 3.015668  |
| 1  | -1.070509 | -4.353259 | 2.349533  |
| 12 | 2.98078   | -0.347195 | -1.169255 |
| 35 | 5.327027  | 0.172122  | -1.363932 |
| 8  | 2.332011  | -0.620094 | 0.813836  |
| 6  | 3.282948  | -0.199744 | 1.848708  |
| 1  | 4.12481   | -0.891249 | 1.891094  |
| 1  | 3.630339  | 0.790781  | 1.559005  |
| 1  | 2.76234   | -0.155465 | 2.804621  |
| 1  | -1.840132 | -2.525082 | 0.920828  |

**RC<sub>1b-r</sub> 4**

E = -4570.594752    ZPVE = 0.521049    NIMAG = 0.

|   |           |           |           |
|---|-----------|-----------|-----------|
| 6 | -1.59952  | 0.980577  | 0.047315  |
| 6 | -3.166822 | 3.003306  | 0.182318  |
| 6 | -0.86289  | 3.277258  | -0.909093 |
| 6 | -0.44361  | 1.973348  | -0.214475 |
| 6 | -1.988617 | 3.947605  | -0.107398 |
| 6 | -3.875826 | 0.771488  | 1.349877  |
| 6 | 0.340506  | 4.209712  | -1.095631 |
| 6 | -3.382046 | -0.252553 | 2.388387  |
| 6 | -5.058243 | 1.552944  | 1.950438  |
| 1 | -1.184696 | 0.167422  | 0.65069   |
| 1 | -3.876864 | 3.528338  | 0.827284  |
| 1 | -3.698893 | 2.775053  | -0.747495 |
| 1 | -1.254677 | 3.028951  | -1.905491 |
| 1 | 0.360919  | 1.488465  | -0.774167 |
| 1 | -0.029445 | 2.215374  | 0.774724  |
| 1 | -2.350459 | 4.834813  | -0.642452 |
| 1 | -1.572383 | 4.306938  | 0.84644   |
| 1 | -4.267899 | 0.221321  | 0.483746  |
| 1 | 1.124979  | 3.732917  | -1.694648 |
| 1 | 0.047291  | 5.135873  | -1.602546 |
| 1 | 0.777324  | 4.482397  | -0.12631  |
| 1 | -3.079995 | 0.261248  | 3.309808  |
| 1 | -4.183225 | -0.954255 | 2.644646  |
| 1 | -2.528319 | -0.839494 | 2.042808  |
| 1 | -4.725869 | 2.205751  | 2.767745  |
| 1 | -5.794405 | 0.854942  | 2.363785  |
| 1 | -5.571968 | 2.170879  | 1.209082  |

|    |           |           |           |
|----|-----------|-----------|-----------|
| 6  | -2.645832 | -1.613751 | -0.983947 |
| 6  | -3.84857  | -2.174112 | -1.44318  |
| 6  | -1.785613 | -2.38261  | -0.180662 |
| 6  | -4.191083 | -3.48338  | -1.094231 |
| 1  | -4.515394 | -1.59115  | -2.068541 |
| 6  | -2.129379 | -3.691338 | 0.157121  |
| 1  | -0.8505   | -1.972405 | 0.188495  |
| 6  | -3.33174  | -4.243981 | -0.297883 |
| 1  | -5.125439 | -3.906493 | -1.450241 |
| 1  | -1.460965 | -4.27684  | 0.781174  |
| 1  | -3.596032 | -5.262929 | -0.031196 |
| 17 | -0.458118 | -0.255352 | -2.594017 |
| 6  | -2.718769 | 1.698655  | 0.876182  |
| 1  | -2.190714 | 2.005906  | 1.794162  |
| 15 | -2.221966 | 0.09075   | -1.49624  |
| 5  | -3.524828 | 0.873929  | -2.714263 |
| 1  | -3.608937 | 0.071394  | -3.615887 |
| 1  | -4.542528 | 0.967392  | -2.063401 |
| 1  | -3.075951 | 1.940983  | -3.054428 |
| 6  | 4.978444  | -0.580033 | -0.331171 |
| 6  | 6.068846  | -0.772415 | -1.176593 |
| 6  | 7.069675  | 0.21255   | -1.160453 |
| 6  | 6.953548  | 1.326549  | -0.326512 |
| 6  | 5.828486  | 1.467443  | 0.506422  |
| 6  | 4.804464  | 0.513172  | 0.528788  |
| 1  | 6.162725  | -1.637136 | -1.825189 |
| 1  | 7.937126  | 0.098569  | -1.804518 |
| 1  | 7.734474  | 2.082693  | -0.322677 |
| 12 | 2.954298  | -0.174275 | 1.304143  |
| 35 | 0.86696   | -0.77992  | 2.450534  |



|   |          |           |           |
|---|----------|-----------|-----------|
| 8 | 3.890764 | -1.477075 | -0.233057 |
| 6 | 3.883618 | -2.688135 | -0.997939 |
| 1 | 4.732445 | -3.321318 | -0.720589 |
| 1 | 2.949262 | -3.195972 | -0.759645 |
| 1 | 3.918172 | -2.464599 | -2.068714 |
| 1 | 5.767016 | 2.346352  | 1.146717  |

**TS<sub>lb-r</sub> 4**

E = -4570.485822    ZPVE = 0.521730    NIMAG = 1.

|   |          |           |           |
|---|----------|-----------|-----------|
| 6 | 1.819167 | -0.293283 | -0.662888 |
| 6 | 4.230654 | -1.022871 | -0.039766 |
| 6 | 3.83961  | 1.349494  | -0.874167 |
| 6 | 2.467821 | 0.905475  | -1.410629 |
| 6 | 4.810404 | 0.164928  | -0.818407 |
| 6 | 2.338084 | -2.845508 | -0.110471 |
| 6 | 4.394514 | 2.504484  | -1.717567 |
| 6 | 1.565554 | -3.5627   | -1.236853 |
| 6 | 3.423703 | -3.800669 | 0.417234  |
| 1 | 0.97915  | -0.633507 | -1.278519 |
| 1 | 4.934593 | -1.857232 | -0.104604 |
| 1 | 4.134662 | -0.769415 | 1.019308  |
| 1 | 3.697344 | 1.718654  | 0.147746  |
| 1 | 1.792874 | 1.762172  | -1.417934 |
| 1 | 2.58747  | 0.585517  | -2.45667  |
| 1 | 5.758037 | 0.481539  | -0.363784 |
| 1 | 5.047825 | -0.157005 | -1.844834 |
| 1 | 1.660975 | -2.670586 | 0.730757  |
| 1 | 3.716855 | 3.365581  | -1.707336 |

|    |           |           |           |
|----|-----------|-----------|-----------|
| 1  | 5.365948  | 2.837477  | -1.334278 |
| 1  | 4.535271  | 2.197542  | -2.762383 |
| 1  | 2.268127  | -3.925648 | -1.997093 |
| 1  | 1.012636  | -4.42755  | -0.854343 |
| 1  | 0.853019  | -2.911526 | -1.755295 |
| 1  | 4.173981  | -4.026556 | -0.350059 |
| 1  | 2.961354  | -4.749135 | 0.713204  |
| 1  | 3.939905  | -3.397118 | 1.29253   |
| 6  | -0.347915 | -0.95309  | 1.461713  |
| 6  | -0.888643 | -0.817854 | 2.752646  |
| 6  | -0.831057 | -2.00595  | 0.653322  |
| 6  | -1.876749 | -1.692008 | 3.213422  |
| 1  | -0.537487 | -0.02601  | 3.401661  |
| 6  | -1.817382 | -2.889867 | 1.124695  |
| 1  | -0.39012  | -2.203809 | -0.317814 |
| 6  | -2.347709 | -2.731574 | 2.405998  |
| 1  | -2.275915 | -1.559679 | 4.214562  |
| 1  | -2.152227 | -3.698328 | 0.483243  |
| 1  | -3.11058  | -3.411632 | 2.770387  |
| 17 | 1.318711  | 2.752393  | 1.116627  |
| 6  | 2.875093  | -1.470428 | -0.619732 |
| 1  | 3.066227  | -1.618745 | -1.696216 |
| 15 | 1.009342  | 0.257293  | 0.98148   |
| 5  | 2.169045  | 0.104985  | 2.580773  |
| 1  | 1.561272  | 0.518118  | 3.539778  |
| 1  | 2.281987  | -1.110965 | 2.609436  |
| 1  | 3.18735   | 0.706938  | 2.368214  |
| 6  | -1.718424 | 2.386044  | 0.434326  |
| 6  | -2.17724  | 3.581017  | -0.140396 |
| 6  | -1.897967 | 3.849235  | -1.483033 |

|    |           |           |           |
|----|-----------|-----------|-----------|
| 6  | -1.193204 | 2.932239  | -2.266397 |
| 6  | -0.755787 | 1.741242  | -1.680907 |
| 6  | -0.992157 | 1.422156  | -0.322134 |
| 1  | -2.730466 | 4.308176  | 0.441876  |
| 1  | -2.242027 | 4.78414   | -1.916431 |
| 1  | -0.993213 | 3.137687  | -3.313562 |
| 12 | -2.261053 | -0.348252 | -0.414959 |
| 35 | -3.600763 | -1.597231 | -1.998055 |
| 8  | -1.959245 | 2.054775  | 1.734377  |
| 6  | -2.607708 | 3.001291  | 2.588911  |
| 1  | -3.62518  | 3.216179  | 2.243082  |
| 1  | -2.64819  | 2.531323  | 3.571481  |
| 1  | -2.030991 | 3.92986   | 2.65059   |
| 1  | -0.226562 | 1.031612  | -2.312506 |

**PC<sub>1b-r</sub> 4**

E = -4570.642617      ZPVE = 0.523837      NIMAG = 0.

|   |          |           |           |
|---|----------|-----------|-----------|
| 6 | 2.164595 | -0.24692  | -0.847064 |
| 6 | 4.633424 | -0.053611 | -0.161929 |
| 6 | 3.471091 | 1.961584  | -1.23598  |
| 6 | 2.389554 | 0.996213  | -1.746413 |
| 6 | 4.78898  | 1.198157  | -1.040126 |
| 6 | 3.425758 | -2.369096 | 0.063285  |
| 6 | 3.638479 | 3.153878  | -2.186454 |
| 6 | 2.751678 | -3.425009 | -0.832787 |
| 6 | 4.786061 | -2.917103 | 0.530645  |
| 1 | 1.482439 | -0.910889 | -1.388964 |
| 1 | 5.58758  | -0.58869  | -0.15662  |

|    |           |           |           |
|----|-----------|-----------|-----------|
| 1  | 4.4297    | 0.239676  | 0.871424  |
| 1  | 3.155246  | 2.350838  | -0.258276 |
| 1  | 1.453732  | 1.535374  | -1.91483  |
| 1  | 2.700445  | 0.615454  | -2.730594 |
| 1  | 5.545086  | 1.863168  | -0.603154 |
| 1  | 5.169693  | 0.900787  | -2.0298   |
| 1  | 2.812543  | -2.238041 | 0.962851  |
| 1  | 2.701715  | 3.712723  | -2.295787 |
| 1  | 4.401947  | 3.847515  | -1.816003 |
| 1  | 3.947721  | 2.819479  | -3.185052 |
| 1  | 3.393265  | -3.657106 | -1.692512 |
| 1  | 2.584548  | -4.35555  | -0.279523 |
| 1  | 1.783009  | -3.099572 | -1.220542 |
| 1  | 5.486334  | -3.017802 | -0.30843  |
| 1  | 4.653023  | -3.91215  | 0.969693  |
| 1  | 5.253184  | -2.282383 | 1.288579  |
| 6  | 0.236784  | -1.342569 | 1.205603  |
| 6  | 0.109518  | -1.652902 | 2.571444  |
| 6  | -0.402806 | -2.172863 | 0.27009   |
| 6  | -0.636264 | -2.759087 | 2.987108  |
| 1  | 0.59717   | -1.029903 | 3.311363  |
| 6  | -1.15085  | -3.276949 | 0.686156  |
| 1  | -0.328578 | -1.984745 | -0.794362 |
| 6  | -1.269289 | -3.57476  | 2.045914  |
| 1  | -0.718142 | -2.981153 | 4.047033  |
| 1  | -1.642117 | -3.897119 | -0.056722 |
| 1  | -1.848641 | -4.435149 | 2.367688  |
| 17 | -5.077721 | 1.058493  | 1.439329  |
| 6  | 3.527658  | -1.00095  | -0.676325 |
| 1  | 3.808139  | -1.247835 | -1.714686 |

|    |           |           |           |
|----|-----------|-----------|-----------|
| 15 | 1.209121  | 0.170539  | 0.74871   |
| 5  | 2.266494  | 0.722365  | 2.317967  |
| 1  | 1.477617  | 0.95641   | 3.202978  |
| 1  | 2.938007  | -0.261591 | 2.547871  |
| 1  | 2.929152  | 1.681685  | 2.010979  |
| 6  | -0.352508 | 2.615268  | 0.696379  |
| 6  | -1.365006 | 3.444618  | 0.17216   |
| 6  | -2.138416 | 3.022927  | -0.902382 |
| 6  | -1.931355 | 1.755944  | -1.466981 |
| 6  | -0.918765 | 0.938021  | -0.94398  |
| 6  | -0.118116 | 1.330531  | 0.138904  |
| 1  | -1.541363 | 4.422486  | 0.601162  |
| 1  | -2.900405 | 3.68402   | -1.303717 |
| 1  | -2.458779 | 1.453651  | -2.367224 |
| 12 | -3.830446 | 0.180426  | -0.273694 |
| 35 | -3.499878 | -1.528629 | -2.003374 |
| 8  | 0.429511  | 2.993886  | 1.724493  |
| 6  | 0.225761  | 4.263225  | 2.354503  |
| 1  | -0.780887 | 4.333815  | 2.779359  |
| 1  | 0.96469   | 4.307141  | 3.153825  |
| 1  | 0.395764  | 5.084784  | 1.650909  |
| 1  | -0.751646 | -0.019118 | -1.422115 |

**R1<sub>III</sub> + b S<sub>N</sub>2@P-f pathways 2 and 3 in THF**

**RC<sub>IIIb-r 2</sub>**

E = -4409.698343      ZPVE = 0.339543      NIMAG = 0.

|    |           |          |           |
|----|-----------|----------|-----------|
| 17 | -1.23333  | 0.523287 | 1.748426  |
| 15 | -1.969792 | 0.103002 | -0.17056  |
| 12 | 3.197878  | 1.288975 | -0.423256 |

|    |           |           |           |
|----|-----------|-----------|-----------|
| 35 | 2.820985  | 3.694486  | -0.196581 |
| 5  | -0.758204 | 0.788665  | -1.517393 |
| 1  | -0.754658 | 1.98693   | -1.366951 |
| 1  | 0.307854  | 0.259084  | -1.302574 |
| 1  | -1.262027 | 0.423251  | -2.558153 |
| 6  | 3.78626   | -0.697255 | -0.882259 |
| 6  | 4.213364  | -1.639697 | -1.825146 |
| 6  | 3.633591  | -1.178278 | 0.425743  |
| 6  | 4.46945   | -2.977673 | -1.472549 |
| 6  | 3.872289  | -2.489403 | 0.832976  |
| 6  | 4.298533  | -3.396209 | -0.15136  |
| 1  | 4.7998    | -3.688188 | -2.226197 |
| 1  | 3.740129  | -2.818024 | 1.858632  |
| 1  | 4.495353  | -4.428105 | 0.126329  |
| 6  | -2.170294 | -1.709298 | -0.157004 |
| 6  | -3.40614  | -2.331414 | 0.082927  |
| 6  | -1.034125 | -2.496386 | -0.418785 |
| 6  | -3.500164 | -3.724897 | 0.068802  |
| 1  | -4.293914 | -1.738584 | 0.272068  |
| 6  | -1.134801 | -3.887857 | -0.425838 |
| 1  | -0.076708 | -2.026276 | -0.618201 |
| 6  | -2.367031 | -4.503499 | -0.182499 |
| 1  | -4.459545 | -4.199108 | 0.251439  |
| 1  | -0.253537 | -4.488656 | -0.627654 |
| 1  | -2.44408  | -5.586546 | -0.192663 |
| 6  | -3.629755 | 0.854481  | -0.161476 |
| 6  | -4.454846 | 0.868459  | 0.975515  |
| 6  | -4.085549 | 1.429593  | -1.359751 |
| 6  | -5.724483 | 1.443586  | 0.908791  |
| 1  | -4.106596 | 0.446953  | 1.912762  |

|   |           |           |           |
|---|-----------|-----------|-----------|
| 6 | -5.361054 | 1.996553  | -1.420509 |
| 1 | -3.449949 | 1.438588  | -2.238495 |
| 6 | -6.180189 | 2.004945  | -0.288884 |
| 1 | -6.354936 | 1.455703  | 1.792482  |
| 1 | -5.706465 | 2.439822  | -2.349286 |
| 1 | -7.168    | 2.45317   | -0.336419 |
| 8 | 3.199833  | -0.15217  | 1.292446  |
| 6 | 3.004351  | -0.418772 | 2.684822  |
| 1 | 2.688456  | 0.521243  | 3.136568  |
| 1 | 2.226108  | -1.175731 | 2.825226  |
| 1 | 3.938808  | -0.755031 | 3.145969  |
| 1 | 4.354298  | -1.343951 | -2.864015 |

**TS<sub>mb-r</sub> 2**

E = -4409.636881    ZPVE = 0.339140    NIMAG = 1.

|    |           |           |           |
|----|-----------|-----------|-----------|
| 17 | -0.1678   | -1.664814 | 1.355191  |
| 15 | 0.851507  | -0.583664 | -0.432035 |
| 12 | -2.095516 | -1.051169 | -0.087134 |
| 35 | -4.371358 | -1.893574 | -0.259879 |
| 5  | 0.01472   | -1.443359 | -2.01559  |
| 1  | 0.499062  | -2.540291 | -2.079137 |
| 1  | -1.19288  | -1.527776 | -1.811065 |
| 1  | 0.209271  | -0.742534 | -2.975348 |
| 6  | -1.145448 | 0.92701   | -0.194332 |
| 6  | -1.654841 | 1.409941  | -1.418581 |
| 6  | -1.210117 | 1.815261  | 0.911468  |
| 6  | -2.217745 | 2.683641  | -1.557063 |
| 6  | -1.763947 | 3.099493  | 0.790033  |

|   |           |           |           |
|---|-----------|-----------|-----------|
| 6 | -2.263082 | 3.52484   | -0.444902 |
| 1 | -2.614081 | 3.009171  | -2.514343 |
| 1 | -1.809463 | 3.772241  | 1.63828   |
| 1 | -2.68655  | 4.521879  | -0.52875  |
| 6 | 1.677753  | 1.062232  | -0.477344 |
| 6 | 2.449697  | 1.507472  | 0.606654  |
| 6 | 1.597898  | 1.843706  | -1.641877 |
| 6 | 3.12513   | 2.727405  | 0.530038  |
| 1 | 2.53193   | 0.91054   | 1.508139  |
| 6 | 2.305344  | 3.043949  | -1.723809 |
| 1 | 0.999061  | 1.515733  | -2.483885 |
| 6 | 3.06001   | 3.495431  | -0.635834 |
| 1 | 3.710509  | 3.069106  | 1.378434  |
| 1 | 2.257321  | 3.630252  | -2.636535 |
| 1 | 3.596457  | 4.437363  | -0.698719 |
| 6 | 2.423904  | -1.554947 | -0.075841 |
| 6 | 2.929634  | -1.906839 | 1.182094  |
| 6 | 3.186408  | -1.853    | -1.218586 |
| 6 | 4.165258  | -2.55223  | 1.296181  |
| 1 | 2.368406  | -1.690215 | 2.083926  |
| 6 | 4.419685  | -2.499716 | -1.103245 |
| 1 | 2.820837  | -1.593971 | -2.207615 |
| 6 | 4.913436  | -2.852403 | 0.15548   |
| 1 | 4.537604  | -2.821229 | 2.280372  |
| 1 | 4.987035  | -2.731576 | -1.999814 |
| 1 | 5.869895  | -3.358567 | 0.245803  |
| 8 | -0.692847 | 1.351976  | 2.087041  |
| 6 | -0.750691 | 2.178442  | 3.250782  |
| 1 | -0.299556 | 1.5914    | 4.051167  |
| 1 | -0.180809 | 3.103819  | 3.111012  |



|   |           |          |           |
|---|-----------|----------|-----------|
| 1 | -1.786441 | 2.419652 | 3.5153    |
| 1 | -1.614415 | 0.773802 | -2.299847 |

**PC<sub>stab-r</sub> 2**

E = -4409.775783    ZPVE = 0.342739    NIMAG = 0.

|    |           |           |           |
|----|-----------|-----------|-----------|
| 17 | -4.253534 | 3.200067  | 0.16086   |
| 15 | 0.688776  | 0.337914  | 0.214942  |
| 12 | -3.489555 | 1.027459  | 0.227896  |
| 35 | -4.315339 | -1.283884 | 0.11263   |
| 5  | -1.028347 | 1.170964  | 0.615765  |
| 1  | -0.75633  | 2.235159  | 1.105277  |
| 1  | -1.553726 | 1.336604  | -0.476352 |
| 1  | -1.6946   | 0.482518  | 1.369285  |
| 6  | 0.569117  | -1.328732 | -0.520155 |
| 6  | -0.691294 | -1.933391 | -0.623269 |
| 6  | 1.711532  | -2.050858 | -0.946638 |
| 6  | -0.833455 | -3.225944 | -1.130214 |
| 6  | 1.568163  | -3.344221 | -1.465483 |
| 6  | 0.298929  | -3.92283  | -1.55094  |
| 1  | -1.81938  | -3.673327 | -1.196526 |
| 1  | 2.434007  | -3.903771 | -1.796472 |
| 1  | 0.204157  | -4.928205 | -1.950659 |
| 6  | 1.706953  | 0.227638  | 1.735855  |
| 6  | 3.103736  | 0.365664  | 1.717673  |
| 6  | 1.054341  | -0.027252 | 2.953391  |
| 6  | 3.834246  | 0.25223   | 2.902319  |
| 1  | 3.620351  | 0.560152  | 0.78535   |
| 6  | 1.790684  | -0.148882 | 4.134206  |

|   |           |           |           |
|---|-----------|-----------|-----------|
| 1 | -0.025355 | -0.13201  | 2.986104  |
| 6 | 3.180895  | -0.007809 | 4.110895  |
| 1 | 4.913998  | 0.364983  | 2.878746  |
| 1 | 1.275954  | -0.347005 | 5.06932   |
| 1 | 3.752407  | -0.097111 | 5.029912  |
| 6 | 1.53538   | 1.445187  | -0.972836 |
| 6 | 1.539203  | 1.14991   | -2.343779 |
| 6 | 2.072535  | 2.663073  | -0.526711 |
| 6 | 2.0917    | 2.053488  | -3.254654 |
| 1 | 1.112459  | 0.21958   | -2.704251 |
| 6 | 2.625753  | 3.562648  | -1.440849 |
| 1 | 2.062733  | 2.915105  | 0.529071  |
| 6 | 2.638559  | 3.258807  | -2.805404 |
| 1 | 2.09298   | 1.81357   | -4.313645 |
| 1 | 3.042747  | 4.499927  | -1.085246 |
| 1 | 3.06841   | 3.959523  | -3.514811 |
| 8 | 2.905394  | -1.417004 | -0.820671 |
| 6 | 4.102109  | -2.085725 | -1.234143 |
| 1 | 4.912052  | -1.385615 | -1.031575 |
| 1 | 4.257293  | -3.004205 | -0.658961 |
| 1 | 4.073009  | -2.314336 | -2.304557 |
| 1 | -1.579112 | -1.401739 | -0.304602 |

### RC<sub>mb-r</sub> 3

E = -4409.697117    ZPVE = 0.339878    NIMAG = 0.

|    |           |           |           |
|----|-----------|-----------|-----------|
| 17 | -0.960799 | 0.129735  | 1.87812   |
| 15 | -1.725234 | -0.043899 | -0.062515 |
| 12 | 2.319443  | 1.352938  | -0.617014 |

|    |           |           |           |
|----|-----------|-----------|-----------|
| 35 | 2.125556  | 3.797772  | -0.669782 |
| 5  | -0.590737 | 0.905765  | -1.312722 |
| 1  | 0.504422  | 0.373377  | -1.243155 |
| 1  | -1.109271 | 0.712122  | -2.388392 |
| 1  | -0.62174  | 2.053647  | -0.959684 |
| 6  | 3.381661  | -0.480271 | -0.56556  |
| 6  | 3.8801    | -1.285368 | -1.601661 |
| 6  | 3.593442  | -0.959072 | 0.740648  |
| 6  | 4.547714  | -2.49956  | -1.362127 |
| 6  | 4.255991  | -2.159911 | 1.022845  |
| 6  | 4.734659  | -2.929001 | -0.048377 |
| 1  | 4.919291  | -3.096687 | -2.191258 |
| 1  | 4.409539  | -2.506172 | 2.039275  |
| 1  | 5.250895  | -3.863175 | 0.157001  |
| 6  | -1.882416 | -1.833659 | -0.315892 |
| 6  | -2.548935 | -2.654249 | 0.611334  |
| 6  | -1.310497 | -2.397693 | -1.467566 |
| 6  | -2.65263  | -4.024241 | 0.376734  |
| 1  | -2.980736 | -2.229128 | 1.512036  |
| 6  | -1.424665 | -3.77126  | -1.698008 |
| 1  | -0.783662 | -1.772718 | -2.180351 |
| 6  | -2.093252 | -4.58293  | -0.778948 |
| 1  | -3.166774 | -4.655491 | 1.094673  |
| 1  | -0.985432 | -4.203006 | -2.591654 |
| 1  | -2.175915 | -5.650616 | -0.958112 |
| 6  | -3.394873 | 0.670208  | 0.073121  |
| 6  | -4.531742 | -0.038566 | -0.345289 |
| 6  | -3.524589 | 1.99738   | 0.520266  |
| 6  | -5.787132 | 0.574704  | -0.307215 |
| 1  | -4.446494 | -1.058344 | -0.703267 |

|   |           |           |           |
|---|-----------|-----------|-----------|
| 6 | -4.781352 | 2.599321  | 0.560643  |
| 1 | -2.652335 | 2.558244  | 0.841243  |
| 6 | -5.914127 | 1.88917   | 0.146921  |
| 1 | -6.662647 | 0.020974  | -0.631677 |
| 1 | -4.875373 | 3.622003  | 0.912028  |
| 1 | -6.891318 | 2.361321  | 0.177703  |
| 8 | 3.082735  | -0.128472 | 1.730412  |
| 6 | 3.266641  | -0.485155 | 3.098221  |
| 1 | 2.791019  | 0.303158  | 3.683297  |
| 1 | 2.788631  | -1.445087 | 3.327704  |
| 1 | 4.331491  | -0.537937 | 3.355413  |
| 1 | 3.748567  | -0.970885 | -2.636813 |

**TS<sub>mb-r</sub> 3**

E = -4409.637017    ZPVE = 0.339073    NIMAG = 1.

|    |           |           |           |
|----|-----------|-----------|-----------|
| 17 | 0.107208  | -1.824188 | 1.344931  |
| 15 | 1.080071  | -0.489814 | -0.475646 |
| 12 | -1.791194 | -1.309268 | -0.104688 |
| 35 | -4.082074 | -2.012813 | -0.540543 |
| 5  | 0.309251  | -1.362685 | -2.082492 |
| 1  | -0.894274 | -1.492561 | -1.920596 |
| 1  | 0.519564  | -0.599841 | -2.990801 |
| 1  | 0.851094  | -2.424949 | -2.197437 |
| 6  | -1.246144 | 0.811478  | -0.153874 |
| 6  | -1.570781 | 1.400115  | -1.390788 |
| 6  | -1.632681 | 1.520685  | 1.010569  |
| 6  | -2.268593 | 2.608106  | -1.489846 |
| 6  | -2.333421 | 2.734864  | 0.933278  |

|   |           |           |           |
|---|-----------|-----------|-----------|
| 6 | -2.643303 | 3.271771  | -0.319432 |
| 1 | -2.518282 | 3.021041  | -2.462869 |
| 1 | -2.638183 | 3.264886  | 1.828268  |
| 1 | -3.180515 | 4.214671  | -0.372791 |
| 6 | 1.609805  | 1.272271  | -0.51883  |
| 6 | 1.624161  | 2.092469  | 0.6174    |
| 6 | 2.087908  | 1.761573  | -1.743987 |
| 6 | 2.108642  | 3.398282  | 0.525447  |
| 1 | 1.248162  | 1.7214    | 1.565161  |
| 6 | 2.563174  | 3.074562  | -1.827723 |
| 1 | 2.087992  | 1.135747  | -2.630337 |
| 6 | 2.576167  | 3.893473  | -0.696756 |
| 1 | 2.115337  | 4.029782  | 1.4087    |
| 1 | 2.920788  | 3.4507    | -2.781541 |
| 1 | 2.946482  | 4.911737  | -0.765992 |
| 6 | 2.693745  | -1.289029 | -0.037561 |
| 6 | 3.786394  | -0.549614 | 0.448943  |
| 6 | 2.857182  | -2.673183 | -0.251146 |
| 6 | 5.013549  | -1.1725   | 0.694765  |
| 1 | 3.694987  | 0.512942  | 0.634456  |
| 6 | 4.083712  | -3.288122 | -0.012543 |
| 1 | 2.026901  | -3.272265 | -0.604504 |
| 6 | 5.167666  | -2.539794 | 0.462406  |
| 1 | 5.845498  | -0.582731 | 1.067358  |
| 1 | 4.192738  | -4.352928 | -0.19443  |
| 1 | 6.121818  | -3.022267 | 0.65198   |
| 8 | -1.296053 | 0.942188  | 2.205666  |
| 6 | -1.717934 | 1.555449  | 3.424435  |
| 1 | -1.36051  | 0.902016  | 4.220776  |
| 1 | -1.276688 | 2.55158   | 3.544338  |

|   |           |          |           |
|---|-----------|----------|-----------|
| 1 | -2.810088 | 1.629858 | 3.475711  |
| 1 | -1.282825 | 0.898044 | -2.310744 |

**PC<sub>imp-r</sub> 3**

E = -4409.773758    ZPVE = 0.342946    NIMAG = 0.

|    |           |           |           |
|----|-----------|-----------|-----------|
| 17 | 3.713712  | -2.789553 | 0.377905  |
| 15 | -0.694772 | 0.249942  | 0.165566  |
| 12 | 3.489061  | -0.487218 | 0.24106   |
| 35 | 5.164903  | 1.267668  | -0.085371 |
| 5  | 1.202169  | 0.478225  | 0.533598  |
| 1  | 1.589783  | -0.604227 | 0.946309  |
| 1  | 1.774451  | 0.846649  | -0.472829 |
| 1  | 1.273244  | 1.304691  | 1.405377  |
| 6  | -1.044025 | -0.806468 | -1.281643 |
| 6  | 0.021839  | -1.28272  | -2.058876 |
| 6  | -2.363545 | -1.198417 | -1.618812 |
| 6  | -0.195824 | -2.132723 | -3.144236 |
| 6  | -2.583222 | -2.054343 | -2.706272 |
| 6  | -1.50031  | -2.514252 | -3.459653 |
| 1  | 0.643401  | -2.491251 | -3.730383 |
| 1  | -3.587374 | -2.361839 | -2.970469 |
| 1  | -1.686397 | -3.176793 | -4.299666 |
| 6  | -1.438366 | 1.901009  | -0.106054 |
| 6  | -2.017815 | 2.255403  | -1.332424 |
| 6  | -1.349959 | 2.859638  | 0.91841   |
| 6  | -2.516123 | 3.546717  | -1.526355 |
| 1  | -2.081637 | 1.532401  | -2.138125 |
| 6  | -1.854137 | 4.146185  | 0.721923  |

|   |           |           |           |
|---|-----------|-----------|-----------|
| 1 | -0.885029 | 2.609714  | 1.866907  |
| 6 | -2.43872  | 4.491979  | -0.500658 |
| 1 | -2.962749 | 3.810678  | -2.480141 |
| 1 | -1.784302 | 4.877443  | 1.521363  |
| 1 | -2.82759  | 5.494245  | -0.653148 |
| 6 | -1.496278 | -0.516271 | 1.630606  |
| 6 | -2.674627 | -0.009425 | 2.196635  |
| 6 | -0.896791 | -1.656687 | 2.190376  |
| 6 | -3.239608 | -0.630039 | 3.313417  |
| 1 | -3.156883 | 0.862212  | 1.768836  |
| 6 | -1.471343 | -2.280482 | 3.299991  |
| 1 | 0.016197  | -2.064066 | 1.768243  |
| 6 | -2.641262 | -1.76606  | 3.866064  |
| 1 | -4.149798 | -0.226813 | 3.747086  |
| 1 | -0.999322 | -3.16201  | 3.722832  |
| 1 | -3.083248 | -2.247253 | 4.733386  |
| 8 | -3.354779 | -0.692096 | -0.843171 |
| 6 | -4.712455 | -1.06611  | -1.103396 |
| 1 | -5.305232 | -0.555723 | -0.345036 |
| 1 | -5.025648 | -0.735979 | -2.099359 |
| 1 | -4.845553 | -2.148478 | -1.007747 |
| 1 | 1.034644  | -0.988041 | -1.812901 |

**R1<sub>IV</sub> + b S<sub>N</sub>2@P-f pathways 2, 3 and 4 in THF**

**RC<sub>IVb-r</sub> 2**

E = -4217.960228      ZPVE = 0.286359      NIMAG = 0.

|    |           |           |           |
|----|-----------|-----------|-----------|
| 17 | 1.757926  | -1.637892 | -1.839196 |
| 15 | 2.267331  | 0.265745  | -1.173434 |
| 12 | -1.832753 | 0.753363  | -0.506773 |

|    |           |           |           |
|----|-----------|-----------|-----------|
| 35 | -2.524205 | 3.097181  | -0.082499 |
| 6  | 3.207448  | 0.946838  | -2.577855 |
| 1  | 3.566299  | 1.939135  | -2.289286 |
| 1  | 4.055558  | 0.311796  | -2.838713 |
| 1  | 2.539707  | 1.040095  | -3.437175 |
| 5  | 0.702081  | 1.312657  | -0.738454 |
| 1  | 0.019062  | 1.292476  | -1.741474 |
| 1  | 0.1816    | 0.804776  | 0.233372  |
| 1  | 1.118548  | 2.41525   | -0.492229 |
| 6  | -2.624686 | -1.224941 | -0.680556 |
| 6  | -2.696945 | -1.433162 | 0.704618  |
| 6  | -3.061628 | -2.297171 | -1.469313 |
| 6  | -3.174943 | -2.586741 | 1.323875  |
| 6  | -3.552547 | -3.487711 | -0.902112 |
| 1  | -3.034473 | -2.217783 | -2.55573  |
| 6  | -3.611766 | -3.626229 | 0.48662   |
| 1  | -3.215925 | -2.69815  | 2.402746  |
| 1  | -3.890873 | -4.299693 | -1.541265 |
| 1  | -3.99367  | -4.541836 | 0.92996   |
| 8  | -2.194912 | -0.316035 | 1.407909  |
| 6  | -2.425614 | -0.181705 | 2.813228  |
| 1  | -1.898801 | -0.963994 | 3.36897   |
| 1  | -2.034056 | 0.796009  | 3.093516  |
| 1  | -3.498161 | -0.227194 | 3.030247  |
| 6  | 3.425895  | -0.000756 | 0.196131  |
| 6  | 4.690452  | -0.575687 | -0.022193 |
| 6  | 3.047824  | 0.38606   | 1.49246   |
| 6  | 5.565808  | -0.757466 | 1.047382  |
| 1  | 4.993042  | -0.891204 | -1.015746 |
| 6  | 3.932598  | 0.20431   | 2.558061  |



|   |          |           |          |
|---|----------|-----------|----------|
| 1 | 2.07445  | 0.8294    | 1.672451 |
| 6 | 5.188236 | -0.366408 | 2.337247 |
| 1 | 6.540259 | -1.203404 | 0.875197 |
| 1 | 3.638058 | 0.508595  | 3.557432 |
| 1 | 5.872983 | -0.508375 | 3.167766 |

**TS<sub>IVb-r</sub> 2**

E = -4217.904667      ZPVE = 0.287431      NIMAG = 1.

|    |           |           |           |
|----|-----------|-----------|-----------|
| 17 | -0.385389 | 2.932113  | 1.357918  |
| 15 | -1.123515 | 1.594252  | -0.326802 |
| 12 | 1.718746  | 0.553421  | -0.56198  |
| 35 | 4.087054  | 0.010722  | -0.363123 |
| 6  | -2.44222  | 2.895844  | -0.619084 |
| 1  | -2.962868 | 2.615836  | -1.540784 |
| 1  | -3.16311  | 2.92587   | 0.201471  |
| 1  | -1.98121  | 3.877913  | -0.732988 |
| 5  | 0.170286  | 1.848147  | -1.794981 |
| 1  | 1.150441  | 2.369017  | -1.279429 |
| 1  | 0.42866   | 0.771229  | -2.286371 |
| 1  | -0.283969 | 2.604635  | -2.606247 |
| 6  | 0.027089  | -0.071948 | 0.961418  |
| 6  | 0.319438  | -1.352651 | 0.44028   |
| 6  | -0.26227  | -0.041755 | 2.336342  |
| 6  | 0.304944  | -2.5266   | 1.191289  |
| 6  | -0.291658 | -1.198242 | 3.124284  |
| 1  | -0.495477 | 0.906617  | 2.806222  |
| 6  | -0.025767 | -2.440728 | 2.547371  |
| 1  | 0.559552  | -3.484228 | 0.752373  |

|   |           |           |           |
|---|-----------|-----------|-----------|
| 1 | -0.530198 | -1.126533 | 4.181352  |
| 1 | -0.054026 | -3.345178 | 3.147559  |
| 8 | 0.742535  | -1.318184 | -0.893667 |
| 6 | 1.141851  | -2.527321 | -1.565407 |
| 1 | 0.314941  | -3.241159 | -1.568441 |
| 1 | 1.376813  | -2.232691 | -2.587515 |
| 1 | 2.023664  | -2.959681 | -1.085105 |
| 6 | -2.315691 | 0.179616  | -0.524244 |
| 6 | -3.256771 | -0.120785 | 0.471828  |
| 6 | -2.346834 | -0.524939 | -1.73674  |
| 6 | -4.20752  | -1.121518 | 0.263443  |
| 1 | -3.246545 | 0.413347  | 1.417645  |
| 6 | -3.302897 | -1.526779 | -1.940489 |
| 1 | -1.636562 | -0.299114 | -2.524511 |
| 6 | -4.232008 | -1.829826 | -0.943088 |
| 1 | -4.927676 | -1.348029 | 1.044187  |
| 1 | -3.318164 | -2.06487  | -2.884046 |
| 1 | -4.971598 | -2.608474 | -1.103847 |

**PC<sub>IVb-r</sub> 2**

E = -4218.041518    ZPVE = 0.289312    NIMAG = 0.

|    |           |           |           |
|----|-----------|-----------|-----------|
| 17 | -3.083728 | 2.369505  | 0.84233   |
| 15 | 1.461471  | 0.242077  | 1.323144  |
| 12 | -2.189539 | 0.285528  | 0.399501  |
| 35 | -3.169727 | -1.883768 | -0.239404 |
| 6  | 2.818697  | 0.704162  | 2.462632  |
| 1  | 2.943312  | -0.125061 | 3.163357  |
| 1  | 3.759542  | 0.86569   | 1.932361  |

|   |           |           |           |
|---|-----------|-----------|-----------|
| 1 | 2.544612  | 1.59946   | 3.02619   |
| 5 | -0.168791 | -0.052133 | 2.353736  |
| 1 | -0.533081 | 1.042867  | 2.701698  |
| 1 | -0.978793 | -0.648706 | 1.660777  |
| 1 | 0.12482   | -0.774001 | 3.274005  |
| 6 | 1.327143  | 1.61493   | 0.111886  |
| 6 | 0.326699  | 1.589556  | -0.872675 |
| 6 | 2.158054  | 2.745995  | 0.168185  |
| 6 | 0.149821  | 2.636312  | -1.772235 |
| 6 | 2.00083   | 3.798378  | -0.736087 |
| 1 | 2.936808  | 2.81352   | 0.918894  |
| 6 | 0.998072  | 3.743248  | -1.705984 |
| 1 | -0.647531 | 2.591093  | -2.505987 |
| 1 | 2.65769   | 4.659955  | -0.676202 |
| 1 | 0.863106  | 4.564172  | -2.402724 |
| 8 | -0.533019 | 0.480837  | -0.917957 |
| 6 | -0.435839 | -0.325266 | -2.138049 |
| 1 | 0.597555  | -0.652558 | -2.258971 |
| 1 | -1.098703 | -1.174219 | -1.982942 |
| 1 | -0.763574 | 0.263193  | -2.996343 |
| 6 | 2.059376  | -1.224069 | 0.406085  |
| 6 | 3.053851  | -1.11031  | -0.579566 |
| 6 | 1.534276  | -2.487398 | 0.719021  |
| 6 | 3.516876  | -2.248537 | -1.242047 |
| 1 | 3.465541  | -0.138463 | -0.836021 |
| 6 | 1.999645  | -3.623622 | 0.051019  |
| 1 | 0.766128  | -2.588082 | 1.478201  |
| 6 | 2.987631  | -3.505518 | -0.929766 |
| 1 | 4.285306  | -2.153241 | -2.003231 |
| 1 | 1.585136  | -4.596838 | 0.295097  |

|   |         |           |           |
|---|---------|-----------|-----------|
| 1 | 3.34566 | -4.389164 | -1.449352 |
|---|---------|-----------|-----------|

**RC<sub>IVb-r</sub> 3**

E = -4217.960430    ZPVE = 0.286746    NIMAG = 0.

|    |           |           |           |
|----|-----------|-----------|-----------|
| 17 | 3.092499  | 1.839349  | -2.181465 |
| 15 | 1.985806  | 0.579449  | -0.952386 |
| 12 | -2.023874 | 0.680174  | -0.350013 |
| 35 | -3.14766  | 2.742272  | 0.392048  |
| 5  | 0.435077  | 1.52928   | -0.289318 |
| 1  | -0.250376 | 1.747066  | -1.265574 |
| 1  | -0.060527 | 0.746459  | 0.499988  |
| 1  | 0.796074  | 2.536506  | 0.254339  |
| 6  | -2.133646 | -1.364236 | -0.986486 |
| 6  | -2.256527 | -1.87239  | 0.315583  |
| 6  | -2.142199 | -2.327236 | -2.004015 |
| 6  | -2.386419 | -3.21937  | 0.649428  |
| 6  | -2.269266 | -3.701982 | -1.730039 |
| 1  | -2.053616 | -2.017036 | -3.04495  |
| 6  | -2.392375 | -4.141484 | -0.409985 |
| 1  | -2.482375 | -3.562302 | 1.674656  |
| 1  | -2.277268 | -4.423864 | -2.543109 |
| 1  | -2.495054 | -5.201129 | -0.192512 |
| 8  | -2.220477 | -0.828872 | 1.264436  |
| 6  | -2.488005 | -1.08959  | 2.645104  |
| 1  | -1.728688 | -1.755915 | 3.067126  |
| 1  | -2.452696 | -0.123461 | 3.148139  |
| 1  | -3.482073 | -1.53308  | 2.764828  |
| 6  | 1.630961  | -0.840246 | -2.037213 |

|   |          |           |           |
|---|----------|-----------|-----------|
| 1 | 1.058199 | -0.492003 | -2.89936  |
| 1 | 2.548763 | -1.325833 | -2.373345 |
| 1 | 1.021819 | -1.549121 | -1.468479 |
| 6 | 3.141403 | 0.027106  | 0.3324    |
| 6 | 4.287684 | -0.720231 | 0.009203  |
| 6 | 2.874247 | 0.355182  | 1.671854  |
| 6 | 5.153853 | -1.136693 | 1.018905  |
| 1 | 4.515452 | -0.968476 | -1.02279  |
| 6 | 3.746625 | -0.067664 | 2.67781   |
| 1 | 1.991552 | 0.929337  | 1.931928  |
| 6 | 4.883526 | -0.811507 | 2.353323  |
| 1 | 6.038342 | -1.712436 | 0.765324  |
| 1 | 3.536013 | 0.186609  | 3.711751  |
| 1 | 5.560707 | -1.13698  | 3.137078  |

**TS<sub>IVb-r</sub> 3**

E = -4217.903907      ZPVE = 0.288186      NIMAG = 1.

|    |           |           |           |
|----|-----------|-----------|-----------|
| 17 | -1.316247 | -0.5999   | -1.878584 |
| 15 | -1.321693 | -0.027748 | 0.349896  |
| 12 | 1.560426  | -0.952491 | 0.208634  |
| 35 | 3.619076  | -2.088802 | -0.463624 |
| 5  | -0.491847 | -1.58067  | 1.234276  |
| 1  | -0.031222 | -2.282855 | 0.347088  |
| 1  | 0.359874  | -1.134074 | 1.972949  |
| 1  | -1.301548 | -2.204111 | 1.859016  |
| 6  | 0.705438  | 1.143788  | -0.379359 |
| 6  | 1.727902  | 1.60241   | 0.48053   |
| 6  | 0.429605  | 1.983459  | -1.471369 |

|   |           |           |           |
|---|-----------|-----------|-----------|
| 6 | 2.433954  | 2.791002  | 0.30185   |
| 6 | 1.10566   | 3.191628  | -1.681426 |
| 1 | -0.345664 | 1.699338  | -2.174353 |
| 6 | 2.097307  | 3.59977   | -0.788402 |
| 1 | 3.232005  | 3.085214  | 0.973704  |
| 1 | 0.85251   | 3.811011  | -2.536695 |
| 1 | 2.625266  | 4.536343  | -0.940264 |
| 8 | 2.050005  | 0.677586  | 1.485449  |
| 6 | 3.134599  | 0.935047  | 2.398114  |
| 1 | 2.942461  | 1.855974  | 2.953443  |
| 1 | 3.150748  | 0.088314  | 3.082979  |
| 1 | 4.082517  | 1.001922  | 1.857772  |
| 6 | -1.371778 | 1.46168   | 1.467698  |
| 1 | -0.407306 | 1.549707  | 1.965632  |
| 1 | -1.573943 | 2.383824  | 0.920045  |
| 1 | -2.167551 | 1.294931  | 2.199696  |
| 6 | -3.177608 | -0.2592   | 0.257871  |
| 6 | -4.033193 | 0.840283  | 0.084225  |
| 6 | -3.737761 | -1.542732 | 0.358016  |
| 6 | -5.418204 | 0.663028  | 0.024092  |
| 1 | -3.631924 | 1.843939  | -0.015875 |
| 6 | -5.123194 | -1.717232 | 0.310547  |
| 1 | -3.097546 | -2.410419 | 0.474036  |
| 6 | -5.968182 | -0.616146 | 0.142421  |
| 1 | -6.063546 | 1.525751  | -0.113864 |
| 1 | -5.539841 | -2.716203 | 0.401131  |
| 1 | -7.044533 | -0.754152 | 0.100451  |

E = -4218.040069    ZPVE = 0.289381    NIMAG = 0.

|    |           |           |           |
|----|-----------|-----------|-----------|
| 17 | -2.088284 | 0.430753  | 2.918612  |
| 15 | 1.239494  | -0.576782 | -0.712104 |
| 12 | -2.156765 | -0.433117 | 0.762871  |
| 35 | -4.14249  | -1.378864 | -0.406606 |
| 5  | -0.06303  | -1.737303 | 0.165253  |
| 1  | -0.231583 | -1.305919 | 1.289607  |
| 1  | -1.065847 | -1.713675 | -0.515816 |
| 1  | 0.397885  | -2.847788 | 0.192111  |
| 6  | 0.999028  | 1.222911  | -0.394764 |
| 6  | -0.28027  | 1.803536  | -0.402955 |
| 6  | 2.093409  | 2.057486  | -0.109546 |
| 6  | -0.472536 | 3.156283  | -0.129721 |
| 6  | 1.915668  | 3.417593  | 0.145104  |
| 1  | 3.093414  | 1.639377  | -0.083771 |
| 6  | 0.631555  | 3.966389  | 0.13803   |
| 1  | -1.475479 | 3.568324  | -0.115521 |
| 1  | 2.777424  | 4.041486  | 0.358317  |
| 1  | 0.483194  | 5.019741  | 0.352849  |
| 8  | -1.388555 | 0.984017  | -0.664226 |
| 6  | -2.180422 | 1.366896  | -1.833388 |
| 1  | -1.530398 | 1.384019  | -2.710413 |
| 1  | -2.951606 | 0.604941  | -1.929051 |
| 1  | -2.635978 | 2.345068  | -1.673687 |
| 6  | 1.210845  | -0.792776 | -2.531444 |
| 1  | 0.194112  | -0.602729 | -2.88215  |
| 1  | 1.896435  | -0.106426 | -3.031996 |
| 1  | 1.473414  | -1.826733 | -2.770376 |
| 6  | 2.933124  | -0.954114 | -0.142406 |

|   |          |           |           |
|---|----------|-----------|-----------|
| 6 | 4.034188 | -0.952867 | -1.013313 |
| 6 | 3.127665 | -1.257465 | 1.216225  |
| 6 | 5.311865 | -1.248433 | -0.529828 |
| 1 | 3.909332 | -0.727743 | -2.067037 |
| 6 | 4.406727 | -1.544448 | 1.695454  |
| 1 | 2.284198 | -1.276271 | 1.899371  |
| 6 | 5.50005  | -1.541057 | 0.823427  |
| 1 | 6.156421 | -1.249035 | -1.211999 |
| 1 | 4.54633  | -1.776115 | 2.74675   |
| 1 | 6.493689 | -1.769178 | 1.197028  |

**RC<sub>IVb-r</sub> 4**

E = -4217.957703    ZPVE = 0.285736    NIMAG = 0.

|    |           |           |           |
|----|-----------|-----------|-----------|
| 17 | -1.575153 | 0.046117  | 1.795042  |
| 15 | -2.195767 | 0.202492  | -0.201184 |
| 12 | 2.986664  | 0.5951    | -0.531094 |
| 35 | 3.910183  | 2.835529  | -0.161605 |
| 5  | -1.255174 | 1.616175  | -1.12277  |
| 1  | -0.093163 | 1.282848  | -1.08011  |
| 1  | -1.721667 | 1.550521  | -2.242497 |
| 1  | -1.495483 | 2.654593  | -0.553659 |
| 6  | 2.397292  | -1.379904 | -1.041513 |
| 6  | 1.969943  | -2.297758 | -2.008495 |
| 6  | 2.542077  | -1.893446 | 0.255307  |
| 6  | 1.704314  | -3.642285 | -1.688841 |
| 6  | 2.292542  | -3.212194 | 0.630355  |
| 6  | 1.865552  | -4.092856 | -0.37693  |
| 1  | 1.373899  | -4.332831 | -2.460815 |



|   |           |           |           |
|---|-----------|-----------|-----------|
| 1 | 2.418862  | -3.565677 | 1.648454  |
| 1 | 1.663079  | -5.130201 | -0.125052 |
| 6 | -1.859687 | -1.474144 | -0.837074 |
| 1 | -0.780133 | -1.643054 | -0.838869 |
| 1 | -2.352669 | -2.243471 | -0.240302 |
| 1 | -2.228957 | -1.516951 | -1.866324 |
| 6 | -4.003335 | 0.377611  | -0.092262 |
| 6 | -4.822459 | -0.654093 | 0.398564  |
| 6 | -4.584262 | 1.57943   | -0.528677 |
| 6 | -6.205655 | -0.483365 | 0.447572  |
| 1 | -4.389965 | -1.584976 | 0.751652  |
| 6 | -5.971179 | 1.742761  | -0.480446 |
| 1 | -3.958042 | 2.380249  | -0.906982 |
| 6 | -6.781128 | 0.713828  | 0.006064  |
| 1 | -6.833428 | -1.282778 | 0.828784  |
| 1 | -6.414761 | 2.672596  | -0.82253  |
| 1 | -7.858634 | 0.842672  | 0.043907  |
| 8 | 2.981645  | -0.892252 | 1.145838  |
| 6 | 3.203654  | -1.197467 | 2.526442  |
| 1 | 3.979662  | -1.962793 | 2.630293  |
| 1 | 3.534961  | -0.270743 | 2.99429   |
| 1 | 2.276836  | -1.53955  | 2.9981    |
| 1 | 1.834032  | -1.976107 | -3.040252 |

**TS<sub>IVb-r</sub> 4**

E = -4217.898860    ZPVE = 0.286121    NIMAG = 1.

|    |           |           |           |
|----|-----------|-----------|-----------|
| 17 | -0.866076 | -0.816931 | -1.480932 |
| 15 | -1.310204 | 0.028563  | 0.783182  |

|    |           |           |           |
|----|-----------|-----------|-----------|
| 12 | 1.247955  | -1.169779 | -0.3202   |
| 35 | 3.371668  | -2.381563 | -0.327994 |
| 5  | -0.620293 | -1.40962  | 1.950623  |
| 1  | 0.391056  | -1.870627 | 1.440339  |
| 1  | -0.358038 | -0.837659 | 2.978564  |
| 1  | -1.461919 | -2.257824 | 2.051562  |
| 6  | 1.203794  | 0.874625  | 0.480454  |
| 6  | 1.90092   | 0.891795  | 1.70782   |
| 6  | 1.459999  | 1.950193  | -0.406945 |
| 6  | 2.826193  | 1.887809  | 2.038424  |
| 6  | 2.388235  | 2.957501  | -0.094985 |
| 6  | 3.065377  | 2.918144  | 1.127213  |
| 1  | 3.354731  | 1.854651  | 2.986588  |
| 1  | 2.588885  | 3.768514  | -0.785244 |
| 1  | 3.777723  | 3.704082  | 1.362749  |
| 6  | -1.377791 | 1.765924  | 1.398475  |
| 1  | -0.533493 | 1.915669  | 2.068789  |
| 1  | -1.305604 | 2.482474  | 0.577829  |
| 1  | -2.328698 | 1.904736  | 1.920523  |
| 6  | -3.091623 | -0.194681 | 0.33764   |
| 6  | -3.862375 | 0.881237  | -0.139585 |
| 6  | -3.702848 | -1.452026 | 0.488402  |
| 6  | -5.215504 | 0.708626  | -0.434942 |
| 1  | -3.417313 | 1.858359  | -0.292861 |
| 6  | -5.059124 | -1.618106 | 0.202593  |
| 1  | -3.125639 | -2.300351 | 0.835471  |
| 6  | -5.819303 | -0.540124 | -0.259542 |
| 1  | -5.795685 | 1.550096  | -0.801257 |
| 1  | -5.518632 | -2.59241  | 0.338832  |
| 1  | -6.873248 | -0.672512 | -0.484686 |

|   |          |          |           |
|---|----------|----------|-----------|
| 8 | 0.751274 | 1.949122 | -1.578192 |
| 6 | 0.992886 | 2.973057 | -2.544018 |
| 1 | 2.034893 | 2.962664 | -2.883429 |
| 1 | 0.335479 | 2.746064 | -3.383774 |
| 1 | 0.746447 | 3.964214 | -2.146116 |
| 1 | 1.719836 | 0.102574 | 2.432815  |

**PC<sub>IVb-r</sub> 4**

E = -4218.042832    ZPVE = 0.289617    NIMAG = 0.

|    |           |           |           |
|----|-----------|-----------|-----------|
| 17 | -2.281279 | -3.497761 | 0.716709  |
| 15 | 1.199913  | 0.247902  | -1.237185 |
| 12 | -1.863569 | -1.38163  | -0.144539 |
| 35 | -3.535874 | 0.375785  | -0.666076 |
| 5  | 0.060841  | -1.251792 | -1.760487 |
| 1  | 0.05827   | -2.063973 | -0.85975  |
| 1  | -1.032205 | -0.768989 | -1.985293 |
| 1  | 0.514521  | -1.729721 | -2.765937 |
| 6  | 0.41597   | 1.46483   | -0.109103 |
| 6  | 0.54885   | 2.848305  | -0.314756 |
| 6  | -0.336953 | 1.037589  | 0.996935  |
| 6  | -0.022982 | 3.765425  | 0.56811   |
| 6  | -0.923193 | 1.942048  | 1.878057  |
| 6  | -0.755158 | 3.311152  | 1.666806  |
| 1  | 0.098726  | 4.829063  | 0.391822  |
| 1  | -1.517031 | 1.582825  | 2.710678  |
| 1  | -1.210694 | 4.01801   | 2.352692  |
| 6  | 1.693883  | 1.186522  | -2.731719 |
| 1  | 0.805502  | 1.605486  | -3.211287 |

|   |           |           |           |
|---|-----------|-----------|-----------|
| 1 | 2.407039  | 1.980482  | -2.502228 |
| 1 | 2.163008  | 0.475982  | -3.416458 |
| 6 | 2.754666  | -0.286631 | -0.4323   |
| 6 | 3.491057  | 0.583503  | 0.388036  |
| 6 | 3.237542  | -1.581664 | -0.679234 |
| 6 | 4.69617   | 0.160952  | 0.952936  |
| 1 | 3.127525  | 1.585809  | 0.593111  |
| 6 | 4.445531  | -1.998273 | -0.113741 |
| 1 | 2.674169  | -2.265157 | -1.306096 |
| 6 | 5.174666  | -1.129209 | 0.702556  |
| 1 | 5.258026  | 0.837994  | 1.589162  |
| 1 | 4.811249  | -3.001765 | -0.308373 |
| 1 | 6.110681  | -1.456281 | 1.145169  |
| 8 | -0.531693 | -0.338429 | 1.165205  |
| 6 | -0.146072 | -0.899847 | 2.457126  |
| 1 | -0.818779 | -0.543864 | 3.238976  |
| 1 | -0.239052 | -1.979382 | 2.350646  |
| 1 | 0.886199  | -0.618376 | 2.670622  |
| 1 | 1.109794  | 3.22051   | -1.164056 |

**R1v + b** S<sub>N</sub>2@P-f pathway 2 in THF

**RC<sub>v<sub>b</sub>-r</sub> 2**

E = -4026.216045      ZPVE = 0.231651      NIMAG = 0.

|    |           |           |           |
|----|-----------|-----------|-----------|
| 17 | 2.24689   | -1.214253 | 1.579392  |
| 15 | 2.9769    | -1.414531 | -0.367944 |
| 12 | -2.092252 | 0.107343  | -0.453253 |
| 35 | -3.634236 | -1.769849 | -0.251998 |
| 6  | 3.381407  | 0.304139  | -0.827296 |
| 1  | 2.464123  | 0.895582  | -0.877011 |

|   |           |           |           |
|---|-----------|-----------|-----------|
| 1 | 4.074353  | 0.750925  | -0.111018 |
| 1 | 3.843279  | 0.282536  | -1.819477 |
| 6 | 4.573383  | -2.260909 | -0.111519 |
| 1 | 5.068571  | -2.340564 | -1.084362 |
| 1 | 5.209642  | -1.703848 | 0.579504  |
| 1 | 4.392479  | -3.265682 | 0.276495  |
| 5 | 1.746166  | -2.32519  | -1.538785 |
| 1 | 0.774744  | -1.614631 | -1.651168 |
| 1 | 2.408081  | -2.383161 | -2.558398 |
| 1 | 1.529962  | -3.409059 | -1.04801  |
| 6 | -0.877946 | 1.786534  | -0.90185  |
| 6 | -0.310011 | 2.646157  | -1.849453 |
| 6 | -0.557504 | 2.062185  | 0.43418   |
| 6 | 0.5274    | 3.712779  | -1.474156 |
| 6 | 0.264591  | 3.101715  | 0.864819  |
| 6 | 0.811007  | 3.935252  | -0.124979 |
| 1 | 0.955843  | 4.36431   | -2.231688 |
| 1 | 0.486761  | 3.279063  | 1.91201   |
| 1 | 1.456572  | 4.757807  | 0.170261  |
| 8 | -1.181505 | 1.138216  | 1.300326  |
| 6 | -0.995687 | 1.24042   | 2.716232  |
| 1 | -1.571624 | 0.429214  | 3.160718  |
| 1 | 0.06237   | 1.12606   | 2.972249  |
| 1 | -1.366912 | 2.202934  | 3.082951  |
| 1 | -0.512212 | 2.495972  | -2.909139 |

**TS<sub>vb-r</sub> 2**

E = -4026.159871    ZPVE = 0.232783    NIMAG = 1.

|    |           |           |           |
|----|-----------|-----------|-----------|
| 17 | 0.530333  | -1.813807 | 1.504536  |
| 15 | 1.591903  | -1.552221 | -0.586328 |
| 12 | -1.118738 | -0.56882  | 0.137147  |
| 35 | -3.534894 | -0.209855 | 0.140879  |
| 6  | 3.051558  | -0.487135 | -0.973225 |
| 1  | 2.782471  | 0.266103  | -1.712192 |
| 1  | 3.382833  | 0.012625  | -0.059143 |
| 1  | 3.859245  | -1.13051  | -1.334853 |
| 6  | 2.565868  | -3.071662 | -0.125416 |
| 1  | 3.105016  | -3.3719   | -1.032045 |
| 1  | 3.291394  | -2.867978 | 0.666469  |
| 1  | 1.902096  | -3.879786 | 0.180239  |
| 5  | 0.223863  | -2.156708 | -1.87351  |
| 1  | -0.848071 | -1.624444 | -1.598839 |
| 1  | 0.587131  | -1.799181 | -2.966806 |
| 1  | 0.164286  | -3.350181 | -1.726355 |
| 6  | 0.546556  | 0.727017  | -0.481225 |
| 6  | 0.215028  | 1.191662  | -1.772925 |
| 6  | 0.98442   | 1.706619  | 0.44745   |
| 6  | 0.279486  | 2.54173   | -2.133424 |
| 6  | 1.052184  | 3.067468  | 0.105644  |
| 6  | 0.698316  | 3.474963  | -1.183576 |
| 1  | 0.003456  | 2.857636  | -3.135027 |
| 1  | 1.376945  | 3.810343  | 0.82459   |
| 1  | 0.758598  | 4.528963  | -1.44034  |
| 8  | 1.339991  | 1.245933  | 1.684725  |
| 6  | 1.721396  | 2.17927   | 2.697166  |
| 1  | 1.918559  | 1.581928  | 3.58762   |
| 1  | 2.628951  | 2.725319  | 2.41594   |
| 1  | 0.913879  | 2.890022  | 2.906008  |

1 -0.102973 0.476338 -2.527077

**PC<sub>vb-r</sub> 2**

E = -4026.295374 ZPVE = 0.235475 NIMAG = 0.

17 4.897 1.409503 -1.031054  
15 -0.722566 1.263137 0.070356  
12 3.081389 0.244722 -0.210744  
35 2.429352 -1.801 1.002911  
6 -1.513905 2.912894 -0.020412  
1 -1.733741 3.14139 -1.06608  
1 -2.433099 2.936728 0.565048  
1 -0.808346 3.656676 0.359927  
6 -0.459564 0.907602 1.847933  
1 0.149075 1.710134 2.274905  
1 -1.415072 0.853079 2.37124  
1 0.080311 -0.037608 1.945687  
5 0.95766 1.337289 -0.913686  
1 1.29187 0.205263 -1.216542  
1 0.822382 2.005931 -1.9036  
1 1.730667 1.878619 -0.132457  
6 -1.894689 0.0285 -0.589364  
6 -1.503051 -0.805026 -1.646725  
6 -3.202224 -0.109868 -0.062784  
6 -2.372967 -1.759494 -2.178371  
6 -4.077234 -1.06468 -0.595508  
6 -3.655522 -1.885524 -1.645159  
1 -2.046917 -2.396982 -2.993359  
1 -5.077397 -1.179622 -0.196781

|   |           |           |           |
|---|-----------|-----------|-----------|
| 1 | -4.343248 | -2.624785 | -2.044848 |
| 8 | -3.530491 | 0.723089  | 0.964134  |
| 6 | -4.847028 | 0.658898  | 1.525171  |
| 1 | -4.871862 | 1.425245  | 2.299441  |
| 1 | -5.606577 | 0.876875  | 0.767295  |
| 1 | -5.035374 | -0.322219 | 1.972977  |
| 1 | -0.504454 | -0.709973 | -2.05655  |
